# Supplementary material for: Quality of Artemisinin-Based Combination Formulations for Malaria Treatment: Prevalence and Risk Factors for Poor Quality Medicines in Public Facilities and Private Sector Drug Outlets in Enugu, Nigeria
Source: PubMed Central journal article supplement (PMC4446036; doi:10.1371/journal.pone.0125577), 2015-05-27
Supplement: pone.0125577.s005.pdf [file pone.0125577.s005.pdf]

| <b>Sampling</b> | <b>country</b>  | <b>dateofpurchase</b> | <b>interviewcode</b> | <b>districtcode</b> | <b>wardcode</b> |
|-----------------|-----------------|-----------------------|----------------------|---------------------|-----------------|
| Convenience     | Nigeria (Enugu) | 01/06/2012            | 1                    | 2                   | 8               |
| Convenience     | Nigeria (Enugu) | 06/06/2012            | 1                    | 2                   | 6               |
| Convenience     | Nigeria (Enugu) | 12/06/2012            | 1                    | 3                   | 11              |
| Convenience     | Nigeria (Enugu) | 11/06/2012            | 1                    | 1                   | 1               |
| Convenience     | Nigeria (Enugu) | 05/06/2012            | 1                    | 1                   | 2               |
| Convenience     | Nigeria (Enugu) | 05/06/2012            | 1                    | 1                   | 1               |
| Convenience     | Nigeria (Enugu) | 05/06/2012            | 1                    | 1                   | 2               |
| Convenience     | Nigeria (Enugu) | 06/06/2012            | 1                    | 2                   | 6               |
| Convenience     | Nigeria (Enugu) | 05/06/2012            | 1                    | 1                   | 2               |
| Convenience     | Nigeria (Enugu) | 11/06/2012            | 1                    | 3                   | 10              |
| Convenience     | Nigeria (Enugu) | 01/06/2012            | 1                    | 2                   | 8               |
| Convenience     | Nigeria (Enugu) | 06/06/2012            | 1                    | 2                   | 6               |
| Convenience     | Nigeria (Enugu) | 11/06/2012            | 1                    | 2                   | 9               |
| Convenience     | Nigeria (Enugu) | 11/06/2012            | 1                    | 2                   | 9               |
| Convenience     | Nigeria (Enugu) | 11/06/2012            | 1                    | 1                   | 1               |
| Convenience     | Nigeria (Enugu) | 07/06/2012            | 1                    | 1                   | 3               |
| Convenience     | Nigeria (Enugu) | 05/06/2012            | 1                    | 1                   | 2               |
| Convenience     | Nigeria (Enugu) | 05/06/2012            | 1                    | 1                   | 1               |
| Convenience     | Nigeria (Enugu) | 06/06/2012            | 1                    | 2                   | 5               |
| Convenience     | Nigeria (Enugu) | 06/06/2012            | 1                    | 2                   | 6               |
| Convenience     | Nigeria (Enugu) | 11/06/2012            | 1                    | 2                   | 9               |
| Convenience     | Nigeria (Enugu) | 07/06/2012            | 1                    | 1                   | 3               |
| Convenience     | Nigeria (Enugu) | 05/06/2012            | 1                    | 1                   | 2               |
| Convenience     | Nigeria (Enugu) | 05/06/2012            | 1                    | 1                   | 2               |
| Convenience     | Nigeria (Enugu) | 05/06/2012            | 1                    | 1                   | 1               |
| Convenience     | Nigeria (Enugu) | 07/06/2012            | 1                    | 2                   | 7               |
| Convenience     | Nigeria (Enugu) | 12/06/2012            | 1                    | 3                   | 13              |
| Convenience     | Nigeria (Enugu) | 13/06/2012            | 1                    | 3                   | 12              |
| Convenience     | Nigeria (Enugu) | 07/06/2012            | 1                    | 2                   | 8               |
| Convenience     | Nigeria (Enugu) | 14/06/2012            | 1                    | 1                   | 0               |
| Convenience     | Nigeria (Enugu) | 06/06/2012            | 1                    | 2                   | 6               |
| Convenience     | Nigeria (Enugu) | 07/06/2012            | 1                    | 2                   | 7               |
| Convenience     | Nigeria (Enugu) | 11/06/2012            | 1                    | 3                   | 16              |
| Convenience     | Nigeria (Enugu) | 13/06/2012            | 1                    | 3                   | 15              |
| Convenience     | Nigeria (Enugu) | 11/06/2012            | 1                    | 3                   | 10              |
| Convenience     | Nigeria (Enugu) | 11/06/2012            | 1                    | 3                   | 10              |
| Convenience     | Nigeria (Enugu) | 12/06/2012            | 1                    | 3                   | 11              |
| Convenience     | Nigeria (Enugu) | 11/06/2012            | 1                    | 1                   | 1               |
| Convenience     | Nigeria (Enugu) | 12/06/2012            | 1                    | 3                   | 13              |
| Convenience     | Nigeria (Enugu) | 11/06/2012            | 1                    | 3                   | 16              |
| Convenience     | Nigeria (Enugu) | 13/06/2012            | 1                    | 3                   | 15              |
| Convenience     | Nigeria (Enugu) | 06/06/2012            | 1                    | 2                   | 5               |
| Convenience     | Nigeria (Enugu) | 13/06/2012            | 1                    | 1                   | 0               |
| Convenience     | Nigeria (Enugu) | 14/06/2012            | 1                    | 1                   | 0               |
| Convenience     | Nigeria (Enugu) | 07/06/2012            | 1                    | 2                   | 7               |
| Convenience     | Nigeria (Enugu) | 07/06/2012            | 1                    | 2                   | 4               |

|             |                 |            |   |   |    |
|-------------|-----------------|------------|---|---|----|
| Convenience | Nigeria (Enugu) | 05/06/2012 | 1 | 1 | 1  |
| Convenience | Nigeria (Enugu) | 06/06/2012 | 1 | 2 | 6  |
| Convenience | Nigeria (Enugu) | 11/06/2012 | 1 | 2 | 9  |
| Convenience | Nigeria (Enugu) | 07/06/2012 | 1 | 1 | 3  |
| Convenience | Nigeria (Enugu) | 05/06/2012 | 1 | 1 | 1  |
| Convenience | Nigeria (Enugu) | 07/06/2012 | 1 | 2 | 4  |
| Convenience | Nigeria (Enugu) | 12/06/2012 | 1 | 3 | 14 |
| Convenience | Nigeria (Enugu) | 11/06/2012 | 1 | 3 | 16 |
| Convenience | Nigeria (Enugu) | 11/06/2012 | 1 | 3 | 10 |
| Convenience | Nigeria (Enugu) | 01/06/2012 | 1 | 2 | 8  |
| Convenience | Nigeria (Enugu) | 05/06/2012 | 1 | 1 | 2  |
| Convenience | Nigeria (Enugu) | 06/06/2012 | 1 | 2 | 6  |
| Convenience | Nigeria (Enugu) | 01/06/2012 | 1 | 2 | 8  |
| Convenience | Nigeria (Enugu) | 06/06/2012 | 1 | 2 | 6  |
| Convenience | Nigeria (Enugu) | 07/06/2012 | 1 | 2 | 8  |
| Convenience | Nigeria (Enugu) | 06/06/2012 | 1 | 2 | 5  |
| Convenience | Nigeria (Enugu) | 01/06/2012 | 1 | 2 | 8  |
| Convenience | Nigeria (Enugu) | 11/06/2012 | 1 | 1 | 1  |
| Convenience | Nigeria (Enugu) | 07/06/2012 | 1 | 2 | 4  |
| Convenience | Nigeria (Enugu) | 06/06/2012 | 1 | 2 | 5  |
| Convenience | Nigeria (Enugu) | 01/06/2012 | 1 | 2 | 8  |
| Convenience | Nigeria (Enugu) | 11/06/2012 | 1 | 1 | 1  |
| Convenience | Nigeria (Enugu) | 07/06/2012 | 1 | 1 | 3  |
| Convenience | Nigeria (Enugu) | 07/06/2012 | 1 | 2 | 8  |
| Convenience | Nigeria (Enugu) | 01/06/2012 | 1 | 2 | 8  |
| Convenience | Nigeria (Enugu) | 07/06/2012 | 1 | 1 | 3  |
| Convenience | Nigeria (Enugu) | 01/06/2012 | 1 | 2 | 8  |
| Convenience | Nigeria (Enugu) | 06/06/2012 | 1 | 2 | 6  |
| Convenience | Nigeria (Enugu) | 11/06/2012 | 1 | 2 | 9  |
| Convenience | Nigeria (Enugu) | 11/06/2012 | 1 | 3 | 10 |
| Convenience | Nigeria (Enugu) | 06/06/2012 | 1 | 2 | 5  |
| Convenience | Nigeria (Enugu) | 01/06/2012 | 1 | 2 | 8  |
| Convenience | Nigeria (Enugu) | 06/06/2012 | 1 | 2 | 6  |
| Convenience | Nigeria (Enugu) | 13/06/2012 | 1 | 3 | 15 |
| Convenience | Nigeria (Enugu) | 01/06/2012 | 1 | 2 | 8  |
| Convenience | Nigeria (Enugu) | 06/06/2012 | 1 | 2 | 6  |
| Convenience | Nigeria (Enugu) | 01/06/2012 | 1 | 2 | 8  |
| Convenience | Nigeria (Enugu) | 06/06/2012 | 1 | 2 | 6  |
| Convenience | Nigeria (Enugu) | 11/06/2012 | 1 | 2 | 9  |
| Convenience | Nigeria (Enugu) | 11/06/2012 | 1 | 2 | 9  |
| Convenience | Nigeria (Enugu) | 12/06/2012 | 1 | 3 | 14 |
| Convenience | Nigeria (Enugu) | 01/06/2012 | 1 | 2 | 8  |
| Convenience | Nigeria (Enugu) | 06/06/2012 | 1 | 2 | 6  |
| Convenience | Nigeria (Enugu) | 11/06/2012 | 1 | 2 | 9  |
| Convenience | Nigeria (Enugu) | 12/06/2012 | 1 | 3 | 11 |
| Convenience | Nigeria (Enugu) | 11/06/2012 | 1 | 1 | 1  |
| Convenience | Nigeria (Enugu) | 07/06/2012 | 1 | 1 | 3  |
| Convenience | Nigeria (Enugu) | 05/06/2012 | 1 | 1 | 2  |
| Convenience | Nigeria (Enugu) | 05/06/2012 | 1 | 1 | 2  |
| Convenience | Nigeria (Enugu) | 05/06/2012 | 1 | 1 | 1  |

|             |                 |            |   |   |    |
|-------------|-----------------|------------|---|---|----|
| Convenience | Nigeria (Enugu) | 07/06/2012 | 1 | 2 | 7  |
| Convenience | Nigeria (Enugu) | 12/06/2012 | 1 | 3 | 14 |
| Convenience | Nigeria (Enugu) | 07/06/2012 | 1 | 2 | 8  |
| Convenience | Nigeria (Enugu) | 11/06/2012 | 1 | 3 | 10 |
| Convenience | Nigeria (Enugu) | 06/06/2012 | 1 | 2 | 5  |
| Convenience | Nigeria (Enugu) | 14/06/2012 | 1 | 1 | 0  |
| Convenience | Nigeria (Enugu) | 01/06/2012 | 1 | 2 | 8  |
| Convenience | Nigeria (Enugu) | 06/06/2012 | 1 | 2 | 6  |
| Convenience | Nigeria (Enugu) | 11/06/2012 | 1 | 1 | 1  |
| Convenience | Nigeria (Enugu) | 11/06/2012 | 1 | 3 | 10 |
| Convenience | Nigeria (Enugu) | 06/06/2012 | 1 | 2 | 6  |
| Convenience | Nigeria (Enugu) | 01/06/2012 | 1 | 2 | 8  |
| Convenience | Nigeria (Enugu) | 06/06/2012 | 1 | 2 | 6  |
| Convenience | Nigeria (Enugu) | 05/06/2012 | 1 | 1 | 2  |
| Convenience | Nigeria (Enugu) | 07/06/2012 | 1 | 2 | 8  |
| Convenience | Nigeria (Enugu) | 11/06/2012 | 1 | 3 | 10 |
| Convenience | Nigeria (Enugu) | 06/06/2012 | 1 | 2 | 5  |
| Convenience | Nigeria (Enugu) | 14/06/2012 | 1 | 1 | 0  |
| Convenience | Nigeria (Enugu) | 01/06/2012 | 1 | 2 | 8  |
| Convenience | Nigeria (Enugu) | 06/06/2012 | 1 | 2 | 6  |
| Convenience | Nigeria (Enugu) | 11/06/2012 | 1 | 2 | 9  |
| Convenience | Nigeria (Enugu) | 05/06/2012 | 1 | 1 | 2  |
| Convenience | Nigeria (Enugu) | 01/06/2012 | 1 | 2 | 8  |
| Convenience | Nigeria (Enugu) | 06/06/2012 | 1 | 2 | 6  |
| Convenience | Nigeria (Enugu) | 11/06/2012 | 1 | 2 | 9  |
| Convenience | Nigeria (Enugu) | 07/06/2012 | 1 | 1 | 3  |
| Convenience | Nigeria (Enugu) | 05/06/2012 | 1 | 1 | 2  |
| Convenience | Nigeria (Enugu) | 07/06/2012 | 1 | 2 | 8  |
| Convenience | Nigeria (Enugu) | 11/06/2012 | 1 | 3 | 10 |
| Convenience | Nigeria (Enugu) | 11/06/2012 | 1 | 1 | 1  |
| Convenience | Nigeria (Enugu) | 13/06/2012 | 1 | 3 | 12 |
| Convenience | Nigeria (Enugu) | 11/06/2012 | 1 | 3 | 16 |
| Convenience | Nigeria (Enugu) | 06/06/2012 | 1 | 2 | 5  |
| Convenience | Nigeria (Enugu) | 06/06/2012 | 1 | 2 | 5  |
| Convenience | Nigeria (Enugu) | 12/06/2012 | 1 | 3 | 11 |
| Convenience | Nigeria (Enugu) | 12/06/2012 | 1 | 3 | 13 |
| Convenience | Nigeria (Enugu) | 11/06/2012 | 1 | 3 | 10 |
| Convenience | Nigeria (Enugu) | 11/06/2012 | 1 | 3 | 16 |
| Convenience | Nigeria (Enugu) | 12/06/2012 | 1 | 3 | 13 |
| Convenience | Nigeria (Enugu) | 07/06/2012 | 1 | 1 | 3  |
| Convenience | Nigeria (Enugu) | 05/06/2012 | 1 | 1 | 2  |
| Convenience | Nigeria (Enugu) | 07/06/2012 | 1 | 2 | 7  |
| Convenience | Nigeria (Enugu) | 12/06/2012 | 1 | 3 | 14 |
| Convenience | Nigeria (Enugu) | 06/06/2012 | 1 | 2 | 6  |
| Convenience | Nigeria (Enugu) | 11/06/2012 | 1 | 3 | 10 |
| Convenience | Nigeria (Enugu) | 13/06/2012 | 1 | 1 | 0  |
| Convenience | Nigeria (Enugu) | 14/06/2012 | 1 | 1 | 0  |
| Convenience | Nigeria (Enugu) | 01/06/2012 | 1 | 2 | 8  |
| Convenience | Nigeria (Enugu) | 06/06/2012 | 1 | 2 | 6  |

|             |                 |            |   |   |    |
|-------------|-----------------|------------|---|---|----|
| Convenience | Nigeria (Enugu) | 11/06/2012 | 1 | 2 | 9  |
| Convenience | Nigeria (Enugu) | 05/06/2012 | 1 | 1 | 2  |
| Convenience | Nigeria (Enugu) | 05/06/2012 | 1 | 1 | 1  |
| Convenience | Nigeria (Enugu) | 07/06/2012 | 1 | 2 | 4  |
| Convenience | Nigeria (Enugu) | 01/06/2012 | 1 | 2 | 8  |
| Convenience | Nigeria (Enugu) | 13/06/2012 | 1 | 1 | 0  |
| Convenience | Nigeria (Enugu) | 07/06/2012 | 1 | 2 | 4  |
| Convenience | Nigeria (Enugu) | 06/06/2012 | 1 | 2 | 6  |
| Convenience | Nigeria (Enugu) | 07/06/2012 | 1 | 2 | 8  |
| Convenience | Nigeria (Enugu) | 07/06/2012 | 1 | 1 | 3  |
| Convenience | Nigeria (Enugu) | 05/06/2012 | 1 | 1 | 2  |
| Convenience | Nigeria (Enugu) | 01/06/2012 | 1 | 2 | 8  |
| Convenience | Nigeria (Enugu) | 07/06/2012 | 1 | 2 | 4  |
| Convenience | Nigeria (Enugu) | 11/06/2012 | 1 | 3 | 10 |
| Convenience | Nigeria (Enugu) | 01/06/2012 | 1 | 2 | 8  |
| Convenience | Nigeria (Enugu) | 11/06/2012 | 1 | 2 | 9  |
| Convenience | Nigeria (Enugu) | 11/06/2012 | 1 | 2 | 9  |
| Convenience | Nigeria (Enugu) | 07/06/2012 | 1 | 1 | 3  |
| Convenience | Nigeria (Enugu) | 11/06/2012 | 1 | 3 | 10 |
| Convenience | Nigeria (Enugu) | 06/06/2012 | 1 | 2 | 5  |
| Convenience | Nigeria (Enugu) | 13/06/2012 | 1 | 3 | 16 |
| Convenience | Nigeria (Enugu) | 01/06/2012 | 1 | 2 | 8  |
| Convenience | Nigeria (Enugu) | 01/06/2012 | 1 | 2 | 8  |
| Convenience | Nigeria (Enugu) | 01/06/2012 | 1 | 2 | 8  |
| Convenience | Nigeria (Enugu) | 07/06/2012 | 1 | 1 | 3  |
| Convenience | Nigeria (Enugu) | 01/06/2012 | 1 | 2 | 8  |
| Convenience | Nigeria (Enugu) | 06/06/2012 | 1 | 2 | 6  |
| Convenience | Nigeria (Enugu) | 07/06/2012 | 1 | 1 | 3  |
| Convenience | Nigeria (Enugu) | 11/06/2012 | 1 | 3 | 10 |
| Convenience | Nigeria (Enugu) | 13/06/2012 | 1 | 3 | 16 |
| Convenience | Nigeria (Enugu) | 01/06/2012 | 1 | 2 | 8  |
| Convenience | Nigeria (Enugu) | 06/06/2012 | 1 | 2 | 6  |
| Convenience | Nigeria (Enugu) | 12/06/2012 | 1 | 3 | 11 |
| Convenience | Nigeria (Enugu) | 11/06/2012 | 1 | 2 | 9  |
| Convenience | Nigeria (Enugu) | 11/06/2012 | 1 | 1 | 1  |
| Convenience | Nigeria (Enugu) | 07/06/2012 | 1 | 1 | 3  |
| Convenience | Nigeria (Enugu) | 05/06/2012 | 1 | 1 | 2  |
| Convenience | Nigeria (Enugu) | 05/06/2012 | 1 | 1 | 2  |
| Convenience | Nigeria (Enugu) | 07/06/2012 | 1 | 2 | 7  |
| Convenience | Nigeria (Enugu) | 12/06/2012 | 1 | 3 | 14 |
| Convenience | Nigeria (Enugu) | 12/06/2012 | 1 | 3 | 13 |
| Convenience | Nigeria (Enugu) | 13/06/2012 | 1 | 3 | 12 |
| Convenience | Nigeria (Enugu) | 11/06/2012 | 1 | 3 | 16 |
| Convenience | Nigeria (Enugu) | 06/06/2012 | 1 | 2 | 5  |
| Convenience | Nigeria (Enugu) | 14/06/2012 | 1 | 1 | 0  |
| Convenience | Nigeria (Enugu) | 01/06/2012 | 1 | 2 | 8  |
| Convenience | Nigeria (Enugu) | 06/06/2012 | 1 | 2 | 6  |
| Convenience | Nigeria (Enugu) | 11/06/2012 | 1 | 2 | 9  |



|             |                 |            |   |   |    |
|-------------|-----------------|------------|---|---|----|
| Convenience | Nigeria (Enugu) | 11/06/2012 | 1 | 1 | 1  |
| Convenience | Nigeria (Enugu) | 07/06/2012 | 1 | 1 | 3  |
| Convenience | Nigeria (Enugu) | 05/06/2012 | 1 | 1 | 1  |
| Convenience | Nigeria (Enugu) | 11/06/2012 | 1 | 3 | 16 |
| Convenience | Nigeria (Enugu) | 07/06/2012 | 1 | 2 | 8  |
| Convenience | Nigeria (Enugu) | 01/06/2012 | 1 | 2 | 8  |
| Convenience | Nigeria (Enugu) | 05/06/2012 | 1 | 1 | 2  |

| Sampling meth | country         | interviewcode | districtcode | wardcode | outletcode |
|---------------|-----------------|---------------|--------------|----------|------------|
| mystery       | Nigeria (Enugu) | 1             | 3            | 1        | 57         |
| mystery       | Nigeria (Enugu) | 5             | 1            | 2        | 17         |
| mystery       | Nigeria (Enugu) | 15            | 2            | 3        | 34         |
| mystery       | Nigeria (Enugu) | 1             | 3            | 1        | 4          |
| mystery       | Nigeria (Enugu) | 1             | 3            | 1        | 21         |
| mystery       | Nigeria (Enugu) | 1             | 3            | 1        | 80         |
| mystery       | Nigeria (Enugu) | 2             | 3            | 5        | 7          |
| mystery       | Nigeria (Enugu) | 2             | 3            | 5        | 29         |
| mystery       | Nigeria (Enugu) | 3             | 2            | 1        | 2          |
| mystery       | Nigeria (Enugu) | 3             | 2            | 4        | 42         |
| mystery       | Nigeria (Enugu) | 4             | 1            | 2        | 12         |
| mystery       | Nigeria (Enugu) | 5             | 1            | 2        | 0          |
| mystery       | Nigeria (Enugu) | 5             | 1            | 2        | 21         |
| mystery       | Nigeria (Enugu) | 5             | 1            | 2        | 30         |
| mystery       | Nigeria (Enugu) | 5             | 1            | 2        | 31         |
| mystery       | Nigeria (Enugu) | 5             | 1            | 2        | 46         |
| mystery       | Nigeria (Enugu) | 5             | 1            | 2        | 49         |
| mystery       | Nigeria (Enugu) | 5             | 2            | 1        | 0          |
| mystery       | Nigeria (Enugu) | 6             | 2            | 1        | 26         |
| mystery       | Nigeria (Enugu) | 6             | 2            | 1        | 28         |
| mystery       | Nigeria (Enugu) | 6             | 2            | 1        | 28         |
| mystery       | Nigeria (Enugu) | 6             | 2            | 3        | 6          |
| mystery       | Nigeria (Enugu) | 6             | 2            | 3        | 39         |
| mystery       | Nigeria (Enugu) | 7             | 2            | 4        | 20         |
| mystery       | Nigeria (Enugu) | 7             | 3            | 5        | 0          |
| mystery       | Nigeria (Enugu) | 8             | 2            | 1        | 0          |
| mystery       | Nigeria (Enugu) | 8             | 2            | 4        | 44         |
| mystery       | Nigeria (Enugu) | 9             | 2            | 1        | 0          |
| mystery       | Nigeria (Enugu) | 9             | 2            | 2        | 10         |
| mystery       | Nigeria (Enugu) | 10            | 3            | 1        | 18         |
| mystery       | Nigeria (Enugu) | 10            | 3            | 1        | 31         |
| mystery       | Nigeria (Enugu) | 10            | 3            | 1        | 53         |
| mystery       | Nigeria (Enugu) | 10            | 3            | 1        | 65         |
| mystery       | Nigeria (Enugu) | 11            | 2            | 5        | 2          |
| mystery       | Nigeria (Enugu) | 12            | 2            | 5        | 24         |
| mystery       | Nigeria (Enugu) | 12            | 3            | 7        | 18         |
| mystery       | Nigeria (Enugu) | 13            | 2            | 1        | 0          |
| mystery       | Nigeria (Enugu) | 14            | 1            | 1        | 7          |
| mystery       | Nigeria (Enugu) | 14            | 1            | 1        | 7          |

|         |                 |    |   |    |    |
|---------|-----------------|----|---|----|----|
| mystery | Nigeria (Enugu) | 14 | 1 | 1  | 18 |
| mystery | Nigeria (Enugu) | 14 | 1 | 3  | 5  |
| mystery | Nigeria (Enugu) | 14 | 1 | 3  | 10 |
| mystery | Nigeria (Enugu) | 14 | 1 | 3  | 23 |
| mystery | Nigeria (Enugu) | 15 | 2 | 1  | 0  |
| mystery | Nigeria (Enugu) | 16 | 1 | 1  | 7  |
| mystery | Nigeria (Enugu) | 16 | 2 | 3  | 0  |
| mystery | Nigeria (Enugu) | 1  | 3 | 1  | 21 |
| mystery | Nigeria (Enugu) | 2  | 3 | 5  | 28 |
| mystery | Nigeria (Enugu) | 2  | 3 | 5  | 29 |
| mystery | Nigeria (Enugu) | 3  | 3 | 71 | 0  |
| mystery | Nigeria (Enugu) | 4  | 1 | 2  | 5  |
| mystery | Nigeria (Enugu) | 4  | 1 | 2  | 9  |
| mystery | Nigeria (Enugu) | 8  | 2 | 1  | 0  |
| mystery | Nigeria (Enugu) | 9  | 2 | 1  | 0  |
| mystery | Nigeria (Enugu) | 10 | 3 | 1  | 25 |
| mystery | Nigeria (Enugu) | 10 | 3 | 1  | 31 |
| mystery | Nigeria (Enugu) | 10 | 3 | 1  | 65 |
| mystery | Nigeria (Enugu) | 11 | 2 | 5  | 26 |
| mystery | Nigeria (Enugu) | 12 | 2 | 5  | 24 |
| mystery | Nigeria (Enugu) | 13 | 2 | 1  | 0  |
| mystery | Nigeria (Enugu) | 15 | 2 | 1  | 0  |
| mystery | Nigeria (Enugu) | 16 | 2 | 3  | 0  |
| mystery | Nigeria (Enugu) | 0  | 0 | 0  | 0  |
| mystery | Nigeria (Enugu) | 1  | 3 | 1  | 4  |
| mystery | Nigeria (Enugu) | 1  | 3 | 1  | 57 |
| mystery | Nigeria (Enugu) | 2  | 3 | 2  | 5  |
| mystery | Nigeria (Enugu) | 2  | 3 | 2  | 7  |
| mystery | Nigeria (Enugu) | 2  | 3 | 2  | 7  |
| mystery | Nigeria (Enugu) | 2  | 3 | 2  | 8  |
| mystery | Nigeria (Enugu) | 2  | 3 | 5  | 7  |
| mystery | Nigeria (Enugu) | 2  | 3 | 5  | 34 |
| mystery | Nigeria (Enugu) | 3  | 2 | 4  | 42 |
| mystery | Nigeria (Enugu) | 4  | 1 | 2  | 38 |
| mystery | Nigeria (Enugu) | 5  | 1 | 2  | 0  |
| mystery | Nigeria (Enugu) | 5  | 1 | 2  | 2  |
| mystery | Nigeria (Enugu) | 5  | 1 | 2  | 21 |
| mystery | Nigeria (Enugu) | 5  | 1 | 2  | 22 |
| mystery | Nigeria (Enugu) | 5  | 2 | 1  | 0  |
| mystery | Nigeria (Enugu) | 6  | 2 | 1  | 28 |
| mystery | Nigeria (Enugu) | 6  | 2 | 3  | 1  |
| mystery | Nigeria (Enugu) | 6  | 2 | 3  | 14 |
| mystery | Nigeria (Enugu) | 6  | 2 | 3  | 39 |
| mystery | Nigeria (Enugu) | 7  | 2 | 4  | 20 |
| mystery | Nigeria (Enugu) | 7  | 2 | 4  | 22 |
| mystery | Nigeria (Enugu) | 7  | 2 | 4  | 36 |
| mystery | Nigeria (Enugu) | 7  | 3 | 5  | 0  |
| mystery | Nigeria (Enugu) | 8  | 2 | 1  | 0  |
| mystery | Nigeria (Enugu) | 9  | 2 | 1  | 0  |
| mystery | Nigeria (Enugu) | 9  | 2 | 2  | 10 |

|         |                 |    |   |   |    |
|---------|-----------------|----|---|---|----|
| mystery | Nigeria (Enugu) | 9  | 2 | 5 | 11 |
| mystery | Nigeria (Enugu) | 9  | 3 | 3 | 3  |
| mystery | Nigeria (Enugu) | 10 | 3 | 1 | 18 |
| mystery | Nigeria (Enugu) | 10 | 3 | 1 | 21 |
| mystery | Nigeria (Enugu) | 10 | 3 | 1 | 31 |
| mystery | Nigeria (Enugu) | 10 | 3 | 1 | 33 |
| mystery | Nigeria (Enugu) | 10 | 3 | 1 | 65 |
| mystery | Nigeria (Enugu) | 13 | 2 | 1 | 0  |
| mystery | Nigeria (Enugu) | 14 | 1 | 1 | 5  |
| mystery | Nigeria (Enugu) | 14 | 1 | 1 | 6  |
| mystery | Nigeria (Enugu) | 14 | 1 | 1 | 16 |
| mystery | Nigeria (Enugu) | 15 | 2 | 1 | 0  |
| mystery | Nigeria (Enugu) | 16 | 1 | 1 | 7  |
| mystery | Nigeria (Enugu) | 16 | 1 | 3 | 30 |
| mystery | Nigeria (Enugu) | 16 | 2 | 3 | 0  |
| mystery | Nigeria (Enugu) | 1  | 3 | 1 | 10 |
| mystery | Nigeria (Enugu) | 1  | 3 | 1 | 33 |
| mystery | Nigeria (Enugu) | 1  | 3 | 1 | 42 |
| mystery | Nigeria (Enugu) | 1  | 3 | 1 | 57 |
| mystery | Nigeria (Enugu) | 1  | 3 | 1 | 60 |
| mystery | Nigeria (Enugu) | 1  | 3 | 1 | 63 |
| mystery | Nigeria (Enugu) | 1  | 3 | 1 | 69 |
| mystery | Nigeria (Enugu) | 1  | 3 | 1 | 76 |
| mystery | Nigeria (Enugu) | 2  | 3 | 2 | 5  |
| mystery | Nigeria (Enugu) | 2  | 3 | 2 | 6  |
| mystery | Nigeria (Enugu) | 2  | 3 | 5 | 33 |
| mystery | Nigeria (Enugu) | 3  | 2 | 4 | 7  |
| mystery | Nigeria (Enugu) | 3  | 2 | 4 | 13 |
| mystery | Nigeria (Enugu) | 3  | 2 | 4 | 14 |
| mystery | Nigeria (Enugu) | 3  | 2 | 4 | 15 |
| mystery | Nigeria (Enugu) | 3  | 2 | 4 | 39 |
| mystery | Nigeria (Enugu) | 3  | 2 | 4 | 42 |
| mystery | Nigeria (Enugu) | 3  | 2 | 4 | 43 |
| mystery | Nigeria (Enugu) | 4  | 1 | 2 | 23 |
| mystery | Nigeria (Enugu) | 5  | 1 | 2 | 22 |
| mystery | Nigeria (Enugu) | 5  | 1 | 2 | 55 |
| mystery | Nigeria (Enugu) | 5  | 1 | 2 | 56 |
| mystery | Nigeria (Enugu) | 5  | 2 | 1 | 0  |
| mystery | Nigeria (Enugu) | 6  | 2 | 1 | 26 |
| mystery | Nigeria (Enugu) | 6  | 2 | 1 | 28 |
| mystery | Nigeria (Enugu) | 6  | 2 | 3 | 37 |
| mystery | Nigeria (Enugu) | 7  | 2 | 4 | 6  |
| mystery | Nigeria (Enugu) | 7  | 2 | 4 | 27 |
| mystery | Nigeria (Enugu) | 7  | 2 | 4 | 36 |
| mystery | Nigeria (Enugu) | 7  | 3 | 5 | 0  |
| mystery | Nigeria (Enugu) | 8  | 2 | 1 | 0  |
| mystery | Nigeria (Enugu) | 8  | 2 | 4 | 16 |
| mystery | Nigeria (Enugu) | 8  | 2 | 4 | 34 |
| mystery | Nigeria (Enugu) | 9  | 2 | 1 | 0  |
| mystery | Nigeria (Enugu) | 9  | 2 | 2 | 2  |

|         |                 |    |   |   |    |
|---------|-----------------|----|---|---|----|
| mystery | Nigeria (Enugu) | 9  | 3 | 5 | 8  |
| mystery | Nigeria (Enugu) | 10 | 3 | 1 | 14 |
| mystery | Nigeria (Enugu) | 10 | 3 | 1 | 18 |
| mystery | Nigeria (Enugu) | 10 | 3 | 1 | 65 |
| mystery | Nigeria (Enugu) | 10 | 3 | 1 | 67 |
| mystery | Nigeria (Enugu) | 11 | 2 | 5 | 22 |
| mystery | Nigeria (Enugu) | 11 | 3 | 7 | 15 |
| mystery | Nigeria (Enugu) | 12 | 2 | 5 | 24 |
| mystery | Nigeria (Enugu) | 12 | 3 | 7 | 18 |
| mystery | Nigeria (Enugu) | 13 | 2 | 1 | 0  |
| mystery | Nigeria (Enugu) | 13 | 2 | 3 | 16 |
| mystery | Nigeria (Enugu) | 13 | 3 | 7 | 1  |
| mystery | Nigeria (Enugu) | 14 | 1 | 3 | 25 |
| mystery | Nigeria (Enugu) | 15 | 2 | 1 | 0  |
| mystery | Nigeria (Enugu) | 15 | 2 | 3 | 20 |
| mystery | Nigeria (Enugu) | 15 | 2 | 3 | 26 |
| mystery | Nigeria (Enugu) | 16 | 1 | 3 | 11 |
| mystery | Nigeria (Enugu) | 16 | 2 | 3 | 0  |
| mystery | Nigeria (Enugu) | 1  | 3 | 1 | 12 |
| mystery | Nigeria (Enugu) | 3  | 2 | 4 | 2  |
| mystery | Nigeria (Enugu) | 3  | 2 | 4 | 8  |
| mystery | Nigeria (Enugu) | 3  | 2 | 4 | 15 |
| mystery | Nigeria (Enugu) | 4  | 1 | 2 | 9  |
| mystery | Nigeria (Enugu) | 4  | 1 | 2 | 23 |
| mystery | Nigeria (Enugu) | 4  | 1 | 2 | 36 |
| mystery | Nigeria (Enugu) | 5  | 2 | 3 | 12 |
| mystery | Nigeria (Enugu) | 7  | 2 | 4 | 6  |
| mystery | Nigeria (Enugu) | 7  | 2 | 4 | 36 |
| mystery | Nigeria (Enugu) | 9  | 2 | 2 | 2  |
| mystery | Nigeria (Enugu) | 14 | 1 | 3 | 32 |
| mystery | Nigeria (Enugu) | 15 | 2 | 1 | 4  |
| mystery | Nigeria (Enugu) | 15 | 2 | 1 | 14 |
| mystery | Nigeria (Enugu) | 15 | 2 | 3 | 10 |
| mystery | Nigeria (Enugu) | 1  | 3 | 1 | 4  |
| mystery | Nigeria (Enugu) | 2  | 3 | 5 | 33 |
| mystery | Nigeria (Enugu) | 4  | 1 | 2 | 1  |
| mystery | Nigeria (Enugu) | 5  | 1 | 2 | 8  |
| mystery | Nigeria (Enugu) | 6  | 2 | 1 | 11 |
| mystery | Nigeria (Enugu) | 6  | 2 | 3 | 36 |
| mystery | Nigeria (Enugu) | 7  | 2 | 4 | 6  |
| mystery | Nigeria (Enugu) | 7  | 2 | 4 | 27 |
| mystery | Nigeria (Enugu) | 11 | 2 | 5 | 22 |
| mystery | Nigeria (Enugu) | 13 | 2 | 5 | 9  |
| mystery | Nigeria (Enugu) | 15 | 2 | 3 | 38 |
| mystery | Nigeria (Enugu) | 5  | 1 | 2 | 2  |
| mystery | Nigeria (Enugu) | 1  | 3 | 1 | 75 |
| mystery | Nigeria (Enugu) | 2  | 3 | 5 | 33 |
| mystery | Nigeria (Enugu) | 4  | 2 | 3 | 3  |
| mystery | Nigeria (Enugu) | 5  | 1 | 2 | 8  |
| mystery | Nigeria (Enugu) | 5  | 1 | 2 | 10 |

|         |                 |    |   |   |    |
|---------|-----------------|----|---|---|----|
| mystery | Nigeria (Enugu) | 5  | 1 | 2 | 59 |
| mystery | Nigeria (Enugu) | 9  | 2 | 2 | 11 |
| mystery | Nigeria (Enugu) | 10 | 3 | 1 | 8  |
| mystery | Nigeria (Enugu) | 11 | 2 | 5 | 1  |
| mystery | Nigeria (Enugu) | 11 | 2 | 5 | 2  |
| mystery | Nigeria (Enugu) | 16 | 1 | 3 | 2  |
| mystery | Nigeria (Enugu) | 16 | 1 | 3 | 26 |
| mystery | Nigeria (Enugu) | 1  | 3 | 1 | 74 |
| mystery | Nigeria (Enugu) | 3  | 2 | 1 | 2  |
| mystery | Nigeria (Enugu) | 4  | 2 | 3 | 3  |
| mystery | Nigeria (Enugu) | 6  | 2 | 1 | 1  |
| mystery | Nigeria (Enugu) | 6  | 2 | 1 | 11 |
| mystery | Nigeria (Enugu) | 6  | 2 | 3 | 6  |
| mystery | Nigeria (Enugu) | 7  | 2 | 4 | 6  |
| mystery | Nigeria (Enugu) | 10 | 3 | 1 | 37 |
| mystery | Nigeria (Enugu) | 12 | 2 | 5 | 10 |
| mystery | Nigeria (Enugu) | 14 | 1 | 1 | 16 |
| mystery | Nigeria (Enugu) | 14 | 1 | 3 | 4  |
| mystery | Nigeria (Enugu) | 15 | 2 | 3 | 38 |
| mystery | Nigeria (Enugu) | 4  | 1 | 2 | 4  |
| mystery | Nigeria (Enugu) | 4  | 2 | 3 | 3  |
| mystery | Nigeria (Enugu) | 5  | 1 | 2 | 31 |
| mystery | Nigeria (Enugu) | 11 | 2 | 5 | 6  |
| mystery | Nigeria (Enugu) | 14 | 1 | 3 | 4  |
| mystery | Nigeria (Enugu) | 1  | 3 | 1 | 12 |
| mystery | Nigeria (Enugu) | 1  | 3 | 1 | 42 |
| mystery | Nigeria (Enugu) | 1  | 3 | 1 | 77 |
| mystery | Nigeria (Enugu) | 1  | 3 | 1 | 83 |
| mystery | Nigeria (Enugu) | 2  | 3 | 6 | 1  |
| mystery | Nigeria (Enugu) | 3  | 2 | 1 | 2  |
| mystery | Nigeria (Enugu) | 3  | 2 | 4 | 2  |
| mystery | Nigeria (Enugu) | 3  | 2 | 6 | 6  |
| mystery | Nigeria (Enugu) | 4  | 1 | 2 | 9  |
| mystery | Nigeria (Enugu) | 5  | 1 | 2 | 57 |
| mystery | Nigeria (Enugu) | 5  | 2 | 3 | 7  |
| mystery | Nigeria (Enugu) | 6  | 2 | 1 | 1  |
| mystery | Nigeria (Enugu) | 6  | 2 | 1 | 11 |
| mystery | Nigeria (Enugu) | 6  | 2 | 1 | 28 |
| mystery | Nigeria (Enugu) | 6  | 2 | 3 | 9  |
| mystery | Nigeria (Enugu) | 6  | 2 | 3 | 25 |
| mystery | Nigeria (Enugu) | 6  | 2 | 3 | 31 |
| mystery | Nigeria (Enugu) | 6  | 2 | 3 | 37 |
| mystery | Nigeria (Enugu) | 7  | 2 | 4 | 6  |
| mystery | Nigeria (Enugu) | 8  | 2 | 1 | 8  |
| mystery | Nigeria (Enugu) | 8  | 2 | 4 | 10 |
| mystery | Nigeria (Enugu) | 9  | 2 | 2 | 1  |
| mystery | Nigeria (Enugu) | 10 | 3 | 1 | 8  |
| mystery | Nigeria (Enugu) | 10 | 3 | 1 | 33 |
| mystery | Nigeria (Enugu) | 10 | 3 | 1 | 71 |
| mystery | Nigeria (Enugu) | 11 | 2 | 5 | 1  |

|         |                 |    |   |   |    |
|---------|-----------------|----|---|---|----|
| mystery | Nigeria (Enugu) | 11 | 2 | 5 | 11 |
| mystery | Nigeria (Enugu) | 11 | 2 | 5 | 22 |
| mystery | Nigeria (Enugu) | 11 | 2 | 5 | 26 |
| mystery | Nigeria (Enugu) | 13 | 2 | 3 | 16 |
| mystery | Nigeria (Enugu) | 13 | 3 | 7 | 33 |
| mystery | Nigeria (Enugu) | 14 | 1 | 3 | 1  |
| mystery | Nigeria (Enugu) | 14 | 1 | 3 | 5  |
| mystery | Nigeria (Enugu) | 14 | 1 | 3 | 35 |
| mystery | Nigeria (Enugu) | 15 | 2 | 1 | 7  |
| mystery | Nigeria (Enugu) | 15 | 2 | 3 | 10 |
| mystery | Nigeria (Enugu) | 15 | 2 | 3 | 11 |
| mystery | Nigeria (Enugu) | 15 | 2 | 3 | 24 |
| mystery | Nigeria (Enugu) | 15 | 2 | 3 | 38 |
| mystery | Nigeria (Enugu) | 16 | 1 | 3 | 38 |
| mystery | Nigeria (Enugu) | 3  | 2 | 4 | 21 |
| mystery | Nigeria (Enugu) | 4  | 1 | 2 | 4  |
| mystery | Nigeria (Enugu) | 4  | 1 | 2 | 12 |
| mystery | Nigeria (Enugu) | 6  | 2 | 1 | 13 |
| mystery | Nigeria (Enugu) | 8  | 2 | 4 | 5  |
| mystery | Nigeria (Enugu) | 9  | 3 | 5 | 31 |
| mystery | Nigeria (Enugu) | 10 | 3 | 1 | 67 |
| mystery | Nigeria (Enugu) | 10 | 3 | 1 | 1  |
| mystery | Nigeria (Enugu) | 11 | 2 | 5 | 1  |
| mystery | Nigeria (Enugu) | 14 | 1 | 1 | 15 |
| mystery | Nigeria (Enugu) | 15 | 2 | 3 | 24 |
| mystery | Nigeria (Enugu) | 15 | 2 | 3 | 38 |
| mystery | Nigeria (Enugu) | 1  | 3 | 1 | 36 |
| mystery | Nigeria (Enugu) | 1  | 3 | 1 | 4  |
| mystery | Nigeria (Enugu) | 1  | 3 | 1 | 57 |
| mystery | Nigeria (Enugu) | 1  | 3 | 1 | 59 |
| mystery | Nigeria (Enugu) | 1  | 3 | 1 | 60 |
| mystery | Nigeria (Enugu) | 1  | 3 | 1 | 69 |
| mystery | Nigeria (Enugu) | 1  | 3 | 1 | 81 |
| mystery | Nigeria (Enugu) | 2  | 3 | 4 | 3  |
| mystery | Nigeria (Enugu) | 2  | 3 | 5 | 25 |
| mystery | Nigeria (Enugu) | 3  | 2 | 4 | 15 |
| mystery | Nigeria (Enugu) | 3  | 2 | 4 | 18 |
| mystery | Nigeria (Enugu) | 3  | 2 | 4 | 2  |
| mystery | Nigeria (Enugu) | 3  | 2 | 4 | 7  |
| mystery | Nigeria (Enugu) | 3  | 2 | 6 | 6  |
| mystery | Nigeria (Enugu) | 3  | 3 | 7 | 0  |
| mystery | Nigeria (Enugu) | 4  | 1 | 2 | 23 |
| mystery | Nigeria (Enugu) | 4  | 1 | 2 | 35 |
| mystery | Nigeria (Enugu) | 4  | 1 | 2 | 36 |
| mystery | Nigeria (Enugu) | 4  | 1 | 2 | 53 |
| mystery | Nigeria (Enugu) | 4  | 1 | 2 | 5  |
| mystery | Nigeria (Enugu) | 5  | 1 | 2 | 33 |
| mystery | Nigeria (Enugu) | 5  | 1 | 2 | 37 |
| mystery | Nigeria (Enugu) | 5  | 1 | 2 | 55 |
| mystery | Nigeria (Enugu) | 5  | 1 | 2 | 57 |

|         |                 |    |   |   |    |
|---------|-----------------|----|---|---|----|
| mystery | Nigeria (Enugu) | 5  | 1 | 2 | 59 |
| mystery | Nigeria (Enugu) | 6  | 2 | 1 | 13 |
| mystery | Nigeria (Enugu) | 6  | 2 | 1 | 15 |
| mystery | Nigeria (Enugu) | 6  | 2 | 1 | 26 |
| mystery | Nigeria (Enugu) | 6  | 2 | 3 | 1  |
| mystery | Nigeria (Enugu) | 6  | 2 | 3 | 39 |
| mystery | Nigeria (Enugu) | 7  | 2 | 4 | 1  |
| mystery | Nigeria (Enugu) | 7  | 2 | 4 | 1  |
| mystery | Nigeria (Enugu) | 7  | 2 | 4 | 22 |
| mystery | Nigeria (Enugu) | 8  | 2 | 4 | 16 |
| mystery | Nigeria (Enugu) | 8  | 2 | 4 | 23 |
| mystery | Nigeria (Enugu) | 8  | 2 | 4 | 34 |
| mystery | Nigeria (Enugu) | 8  | 2 | 4 | 5  |
| mystery | Nigeria (Enugu) | 9  | 2 | 2 | 11 |
| mystery | Nigeria (Enugu) | 2  | 3 | 2 | 5  |
| mystery | Nigeria (Enugu) | 9  | 3 | 5 | 20 |
| mystery | Nigeria (Enugu) | 9  | 3 | 5 | 31 |
| mystery | Nigeria (Enugu) | 9  | 3 | 6 | 8  |
| mystery | Nigeria (Enugu) | 1  | 3 | 1 | 21 |
| mystery | Nigeria (Enugu) | 10 | 3 | 1 | 1  |
| mystery | Nigeria (Enugu) | 10 | 3 | 1 | 8  |
| mystery | Nigeria (Enugu) | 11 | 2 | 5 | 21 |
| mystery | Nigeria (Enugu) | 12 | 2 | 5 | 10 |
| mystery | Nigeria (Enugu) | 13 | 2 | 3 | 21 |
| mystery | Nigeria (Enugu) | 13 | 2 | 5 | 25 |
| mystery | Nigeria (Enugu) | 13 | 2 | 5 | 9  |
| mystery | Nigeria (Enugu) | 13 | 3 | 7 | 28 |
| mystery | Nigeria (Enugu) | 13 | 3 | 7 | 32 |
| mystery | Nigeria (Enugu) | 14 | 1 | 1 | 20 |
| mystery | Nigeria (Enugu) | 14 | 1 | 3 | 23 |
| mystery | Nigeria (Enugu) | 14 | 1 | 3 | 4  |
| mystery | Nigeria (Enugu) | 14 | 1 | 3 | 5  |
| mystery | Nigeria (Enugu) | 15 | 2 | 1 | 4  |
| mystery | Nigeria (Enugu) | 15 | 2 | 1 | 7  |
| mystery | Nigeria (Enugu) | 15 | 2 | 3 | 10 |
| mystery | Nigeria (Enugu) | 15 | 2 | 3 | 26 |
| mystery | Nigeria (Enugu) | 16 | 1 | 1 | 28 |
| mystery | Nigeria (Enugu) | 16 | 1 | 3 | 11 |
| mystery | Nigeria (Enugu) | 16 | 1 | 3 | 6  |
| mystery | Nigeria (Enugu) | 16 | 1 | 3 | 7  |
| mystery | Nigeria (Enugu) | 5  | 1 | 2 | 27 |
| mystery | Nigeria (Enugu) | 1  | 3 | 1 | 21 |
| mystery | Nigeria (Enugu) | 1  | 3 | 1 | 60 |
| mystery | Nigeria (Enugu) | 1  | 3 | 1 | 75 |
| mystery | Nigeria (Enugu) | 2  | 3 | 2 | 5  |
| mystery | Nigeria (Enugu) | 2  | 3 | 2 | 6  |
| mystery | Nigeria (Enugu) | 2  | 3 | 5 | 34 |
| mystery | Nigeria (Enugu) | 3  | 2 | 4 | 2  |
| mystery | Nigeria (Enugu) | 3  | 3 | 7 | 0  |
| mystery | Nigeria (Enugu) | 5  | 1 | 2 | 21 |

|         |                 |    |   |   |    |
|---------|-----------------|----|---|---|----|
| mystery | Nigeria (Enugu) | 5  | 1 | 2 | 22 |
| mystery | Nigeria (Enugu) | 5  | 1 | 2 | 33 |
| mystery | Nigeria (Enugu) | 5  | 1 | 2 | 49 |
| mystery | Nigeria (Enugu) | 5  | 2 | 3 | 12 |
| mystery | Nigeria (Enugu) | 6  | 2 | 1 | 13 |
| mystery | Nigeria (Enugu) | 6  | 2 | 3 | 37 |
| mystery | Nigeria (Enugu) | 8  | 2 | 4 | 16 |
| mystery | Nigeria (Enugu) | 8  | 2 | 4 | 23 |
| mystery | Nigeria (Enugu) | 9  | 3 | 5 | 20 |
| mystery | Nigeria (Enugu) | 9  | 3 | 5 | 31 |
| mystery | Nigeria (Enugu) | 9  | 3 | 6 | 8  |
| mystery | Nigeria (Enugu) | 10 | 3 | 1 | 1  |
| mystery | Nigeria (Enugu) | 10 | 3 | 4 | 20 |
| mystery | Nigeria (Enugu) | 12 | 3 | 7 | 6  |
| mystery | Nigeria (Enugu) | 13 | 2 | 3 | 21 |
| mystery | Nigeria (Enugu) | 13 | 3 | 7 | 28 |
| mystery | Nigeria (Enugu) | 13 | 3 | 7 | 8  |
| mystery | Nigeria (Enugu) | 13 | 3 | 7 | 9  |
| mystery | Nigeria (Enugu) | 14 | 1 | 1 | 1  |
| mystery | Nigeria (Enugu) | 14 | 1 | 1 | 7  |
| mystery | Nigeria (Enugu) | 15 | 2 | 1 | 17 |
| mystery | Nigeria (Enugu) | 15 | 2 | 1 | 5  |
| mystery | Nigeria (Enugu) | 15 | 2 | 3 | 26 |
| mystery | Nigeria (Enugu) | 15 | 2 | 3 | 38 |
| mystery | Nigeria (Enugu) | 16 | 1 | 1 | 17 |
| mystery | Nigeria (Enugu) | 16 | 1 | 3 | 2  |
| mystery | Nigeria (Enugu) | 16 | 1 | 3 | 31 |
| mystery | Nigeria (Enugu) | 1  | 3 | 1 | 12 |
| mystery | Nigeria (Enugu) | 1  | 3 | 1 | 21 |
| mystery | Nigeria (Enugu) | 1  | 3 | 1 | 42 |
| mystery | Nigeria (Enugu) | 1  | 3 | 1 | 59 |
| mystery | Nigeria (Enugu) | 1  | 3 | 1 | 60 |
| mystery | Nigeria (Enugu) | 2  | 3 | 2 | 5  |
| mystery | Nigeria (Enugu) | 2  | 3 | 2 | 6  |
| mystery | Nigeria (Enugu) | 2  | 3 | 5 | 34 |
| mystery | Nigeria (Enugu) | 3  | 2 | 1 | 2  |
| mystery | Nigeria (Enugu) | 3  | 2 | 6 | 6  |
| mystery | Nigeria (Enugu) | 3  | 3 | 7 | 0  |
| mystery | Nigeria (Enugu) | 4  | 1 | 2 | 23 |
| mystery | Nigeria (Enugu) | 5  | 1 | 2 | 2  |
| mystery | Nigeria (Enugu) | 5  | 1 | 2 | 8  |
| mystery | Nigeria (Enugu) | 5  | 1 | 2 | 10 |
| mystery | Nigeria (Enugu) | 7  | 2 | 4 | 22 |
| mystery | Nigeria (Enugu) | 8  | 2 | 4 | 34 |
| mystery | Nigeria (Enugu) | 9  | 2 | 2 | 6  |
| mystery | Nigeria (Enugu) | 9  | 3 | 5 | 31 |
| mystery | Nigeria (Enugu) | 9  | 3 | 6 | 8  |
| mystery | Nigeria (Enugu) | 10 | 3 | 1 | 14 |
| mystery | Nigeria (Enugu) | 10 | 3 | 1 | 15 |
| mystery | Nigeria (Enugu) | 10 | 3 | 1 | 33 |



|         |                 |    |   |   |    |
|---------|-----------------|----|---|---|----|
| mystery | Nigeria (Enugu) | 10 | 3 | 1 | 53 |
| mystery | Nigeria (Enugu) | 10 | 3 | 1 | 67 |
| mystery | Nigeria (Enugu) | 11 | 2 | 5 | 2  |
| mystery | Nigeria (Enugu) | 12 | 2 | 5 | 24 |
| mystery | Nigeria (Enugu) | 13 | 2 | 3 | 21 |
| mystery | Nigeria (Enugu) | 13 | 2 | 5 | 18 |
| mystery | Nigeria (Enugu) | 14 | 1 | 3 | 21 |
| mystery | Nigeria (Enugu) | 16 | 1 | 3 | 27 |
| mystery | Nigeria (Enugu) | 16 | 1 | 3 | 30 |
| mystery | Nigeria (Enugu) | 5  | 1 | 2 | 8  |
| mystery | Nigeria (Enugu) | 14 | 1 | 3 | 5  |
| mystery | Nigeria (Enugu) | 15 | 2 | 1 | 7  |
| mystery | Nigeria (Enugu) | 5  | 1 | 2 | 8  |
| mystery | Nigeria (Enugu) | 5  | 2 | 3 | 7  |
| mystery | Nigeria (Enugu) | 6  | 2 | 1 | 1  |
| mystery | Nigeria (Enugu) | 7  | 2 | 4 | 1  |
| mystery | Nigeria (Enugu) | 8  | 2 | 4 | 10 |
| mystery | Nigeria (Enugu) | 11 | 2 | 5 | 1  |
| mystery | Nigeria (Enugu) | 11 | 2 | 5 | 6  |
| mystery | Nigeria (Enugu) | 12 | 2 | 5 | 10 |
| mystery | Nigeria (Enugu) | 15 | 2 | 1 | 29 |
| mystery | Nigeria (Enugu) | 15 | 2 | 3 | 38 |
| mystery | Nigeria (Enugu) | 5  | 1 | 2 | 33 |
| mystery | Nigeria (Enugu) | 3  | 1 | 2 | 0  |
| mystery | Nigeria (Enugu) | 5  | 1 | 2 | 30 |
| mystery | Nigeria (Enugu) | 6  | 2 | 3 | 14 |
| mystery | Nigeria (Enugu) | 3  | 2 | 4 | 7  |
| mystery | Nigeria (Enugu) | 10 | 3 | 1 | 18 |
| mystery | Nigeria (Enugu) | 10 | 3 | 1 | 21 |
| mystery | Nigeria (Enugu) | 16 | 1 | 1 | 7  |
| mystery | Nigeria (Enugu) | 1  | 3 | 1 | 57 |
| mystery | Nigeria (Enugu) | 3  | 2 | 1 | 2  |
| mystery | Nigeria (Enugu) | 4  | 1 | 2 | 12 |
| mystery | Nigeria (Enugu) | 5  | 1 | 2 | 8  |
| mystery | Nigeria (Enugu) | 12 | 3 | 7 | 6  |
| mystery | Nigeria (Enugu) | 13 | 2 | 5 | 25 |
| mystery | Nigeria (Enugu) | 13 | 3 | 7 | 28 |
| mystery | Nigeria (Enugu) | 14 | 1 | 1 | 16 |
| mystery | Nigeria (Enugu) | 16 | 1 | 3 | 27 |
| mystery | Nigeria (Enugu) | 11 | 3 | 7 | 24 |
| mystery | Nigeria (Enugu) | 12 | 2 | 5 | 28 |
| mystery | Nigeria (Enugu) | 5  | 1 | 2 | 22 |
| mystery | Nigeria (Enugu) | 7  | 2 | 4 | 22 |
| mystery | Nigeria (Enugu) | 9  | 2 | 1 | 0  |
| mystery | Nigeria (Enugu) | 6  | 2 | 3 | 6  |
| mystery | Nigeria (Enugu) | 2  | 3 | 2 | 5  |
| mystery | Nigeria (Enugu) | 3  | 2 | 4 | 7  |
| mystery | Nigeria (Enugu) | 3  | 2 | 4 | 21 |
| mystery | Nigeria (Enugu) | 4  | 1 | 2 | 19 |
| mystery | Nigeria (Enugu) | 4  | 1 | 2 | 38 |

|         |                 |    |   |   |    |
|---------|-----------------|----|---|---|----|
| mystery | Nigeria (Enugu) | 5  | 1 | 2 | 8  |
| mystery | Nigeria (Enugu) | 5  | 1 | 2 | 10 |
| mystery | Nigeria (Enugu) | 5  | 1 | 2 | 21 |
| mystery | Nigeria (Enugu) | 5  | 1 | 2 | 22 |
| mystery | Nigeria (Enugu) | 5  | 2 | 3 | 12 |
| mystery | Nigeria (Enugu) | 7  | 2 | 4 | 20 |
| mystery | Nigeria (Enugu) | 7  | 2 | 4 | 36 |
| mystery | Nigeria (Enugu) | 8  | 2 | 1 | 8  |
| mystery | Nigeria (Enugu) | 9  | 2 | 2 | 6  |
| mystery | Nigeria (Enugu) | 11 | 2 | 5 | 21 |
| mystery | Nigeria (Enugu) | 11 | 3 | 7 | 24 |
| mystery | Nigeria (Enugu) | 14 | 1 | 3 | 25 |
| mystery | Nigeria (Enugu) | 15 | 2 | 3 | 11 |
| mystery | Nigeria (Enugu) | 15 | 2 | 3 | 26 |
| mystery | Nigeria (Enugu) | 1  | 3 | 1 | 4  |
| mystery | Nigeria (Enugu) | 1  | 3 | 1 | 39 |
| mystery | Nigeria (Enugu) | 2  | 3 | 2 | 5  |
| mystery | Nigeria (Enugu) | 4  | 1 | 2 | 8  |
| mystery | Nigeria (Enugu) | 4  | 1 | 2 | 38 |
| mystery | Nigeria (Enugu) | 4  | 2 | 3 | 3  |
| mystery | Nigeria (Enugu) | 5  | 1 | 2 | 49 |
| mystery | Nigeria (Enugu) | 6  | 2 | 3 | 14 |
| mystery | Nigeria (Enugu) | 7  | 2 | 4 | 1  |
| mystery | Nigeria (Enugu) | 7  | 2 | 4 | 22 |
| mystery | Nigeria (Enugu) | 8  | 2 | 4 | 10 |
| mystery | Nigeria (Enugu) | 8  | 2 | 4 | 17 |
| mystery | Nigeria (Enugu) | 9  | 2 | 2 | 10 |
| mystery | Nigeria (Enugu) | 2  | 3 | 2 | 5  |
| mystery | Nigeria (Enugu) | 9  | 3 | 5 | 19 |
| mystery | Nigeria (Enugu) | 10 | 3 | 1 | 14 |
| mystery | Nigeria (Enugu) | 13 | 2 | 5 | 25 |
| mystery | Nigeria (Enugu) | 13 | 2 | 5 | 25 |
| mystery | Nigeria (Enugu) | 13 | 3 | 7 | 4  |
| mystery | Nigeria (Enugu) | 13 | 3 | 7 | 32 |
| mystery | Nigeria (Enugu) | 14 | 1 | 1 | 7  |
| mystery | Nigeria (Enugu) | 14 | 1 | 3 | 1  |
| mystery | Nigeria (Enugu) | 15 | 2 | 1 | 14 |
| mystery | Nigeria (Enugu) | 6  | 2 | 3 | 36 |
| mystery | Nigeria (Enugu) | 10 | 3 | 1 | 66 |
| mystery | Nigeria (Enugu) | 15 | 2 | 1 | 7  |
| mystery | Nigeria (Enugu) | 1  | 3 | 1 | 4  |
| mystery | Nigeria (Enugu) | 1  | 3 | 1 | 12 |
| mystery | Nigeria (Enugu) | 1  | 3 | 1 | 13 |
| mystery | Nigeria (Enugu) | 1  | 3 | 1 | 21 |
| mystery | Nigeria (Enugu) | 1  | 3 | 1 | 42 |
| mystery | Nigeria (Enugu) | 1  | 3 | 1 | 57 |
| mystery | Nigeria (Enugu) | 1  | 3 | 1 | 60 |
| mystery | Nigeria (Enugu) | 1  | 3 | 1 | 74 |
| mystery | Nigeria (Enugu) | 1  | 3 | 1 | 77 |
| mystery | Nigeria (Enugu) | 1  | 3 | 1 | 80 |

|         |                 |    |   |   |    |
|---------|-----------------|----|---|---|----|
| mystery | Nigeria (Enugu) | 1  | 3 | 1 | 81 |
| mystery | Nigeria (Enugu) | 2  | 3 | 5 | 28 |
| mystery | Nigeria (Enugu) | 2  | 3 | 5 | 29 |
| mystery | Nigeria (Enugu) | 2  | 3 | 5 | 33 |
| mystery | Nigeria (Enugu) | 2  | 3 | 5 | 34 |
| mystery | Nigeria (Enugu) | 2  | 3 | 6 | 2  |
| mystery | Nigeria (Enugu) | 3  | 2 | 1 | 2  |
| mystery | Nigeria (Enugu) | 3  | 2 | 4 | 14 |
| mystery | Nigeria (Enugu) | 3  | 2 | 4 | 43 |
| mystery | Nigeria (Enugu) | 3  | 2 | 6 | 6  |
| mystery | Nigeria (Enugu) | 4  | 1 | 2 | 9  |
| mystery | Nigeria (Enugu) | 4  | 1 | 2 | 15 |
| mystery | Nigeria (Enugu) | 4  | 1 | 2 | 18 |
| mystery | Nigeria (Enugu) | 4  | 1 | 2 | 23 |
| mystery | Nigeria (Enugu) | 4  | 1 | 2 | 35 |
| mystery | Nigeria (Enugu) | 4  | 1 | 2 | 38 |
| mystery | Nigeria (Enugu) | 5  | 1 | 2 | 21 |
| mystery | Nigeria (Enugu) | 5  | 1 | 2 | 30 |
| mystery | Nigeria (Enugu) | 5  | 1 | 2 | 55 |
| mystery | Nigeria (Enugu) | 5  | 1 | 2 | 57 |
| mystery | Nigeria (Enugu) | 6  | 2 | 1 | 15 |
| mystery | Nigeria (Enugu) | 6  | 2 | 3 | 14 |
| mystery | Nigeria (Enugu) | 6  | 2 | 3 | 36 |
| mystery | Nigeria (Enugu) | 6  | 2 | 3 | 39 |
| mystery | Nigeria (Enugu) | 7  | 2 | 4 | 25 |
| mystery | Nigeria (Enugu) | 8  | 2 | 1 | 8  |
| mystery | Nigeria (Enugu) | 8  | 2 | 4 | 5  |
| mystery | Nigeria (Enugu) | 8  | 2 | 4 | 16 |
| mystery | Nigeria (Enugu) | 8  | 2 | 4 | 44 |
| mystery | Nigeria (Enugu) | 9  | 2 | 2 | 10 |
| mystery | Nigeria (Enugu) | 9  | 2 | 2 | 11 |
| mystery | Nigeria (Enugu) | 9  | 3 | 5 | 8  |
| mystery | Nigeria (Enugu) | 9  | 3 | 5 | 16 |
| mystery | Nigeria (Enugu) | 9  | 3 | 5 | 19 |
| mystery | Nigeria (Enugu) | 10 | 3 | 1 | 5  |
| mystery | Nigeria (Enugu) | 10 | 3 | 1 | 14 |
| mystery | Nigeria (Enugu) | 10 | 3 | 1 | 24 |
| mystery | Nigeria (Enugu) | 10 | 3 | 1 | 33 |
| mystery | Nigeria (Enugu) | 10 | 3 | 1 | 37 |
| mystery | Nigeria (Enugu) | 10 | 3 | 1 | 66 |
| mystery | Nigeria (Enugu) | 10 | 3 | 1 | 67 |
| mystery | Nigeria (Enugu) | 10 | 3 | 1 | 78 |
| mystery | Nigeria (Enugu) | 11 | 2 | 5 | 5  |
| mystery | Nigeria (Enugu) | 11 | 2 | 5 | 11 |
| mystery | Nigeria (Enugu) | 11 | 2 | 5 | 21 |
| mystery | Nigeria (Enugu) | 11 | 2 | 5 | 26 |
| mystery | Nigeria (Enugu) | 11 | 3 | 7 | 14 |
| mystery | Nigeria (Enugu) | 11 | 3 | 7 | 15 |
| mystery | Nigeria (Enugu) | 12 | 2 | 5 | 3  |
| mystery | Nigeria (Enugu) | 12 | 3 | 7 | 12 |

|         |                 |    |   |   |    |
|---------|-----------------|----|---|---|----|
| mystery | Nigeria (Enugu) | 13 | 2 | 3 | 21 |
| mystery | Nigeria (Enugu) | 13 | 2 | 5 | 25 |
| mystery | Nigeria (Enugu) | 13 | 3 | 7 | 28 |
| mystery | Nigeria (Enugu) | 14 | 1 | 1 | 18 |
| mystery | Nigeria (Enugu) | 14 | 1 | 3 | 4  |
| mystery | Nigeria (Enugu) | 14 | 1 | 3 | 5  |
| mystery | Nigeria (Enugu) | 15 | 2 | 1 | 5  |
| mystery | Nigeria (Enugu) | 15 | 2 | 1 | 7  |
| mystery | Nigeria (Enugu) | 15 | 2 | 1 | 14 |
| mystery | Nigeria (Enugu) | 15 | 2 | 1 | 19 |
| mystery | Nigeria (Enugu) | 15 | 2 | 3 | 10 |
| mystery | Nigeria (Enugu) | 15 | 2 | 3 | 20 |
| mystery | Nigeria (Enugu) | 15 | 2 | 3 | 26 |
| mystery | Nigeria (Enugu) | 15 | 2 | 3 | 30 |
| mystery | Nigeria (Enugu) | 16 | 1 | 1 | 7  |
| mystery | Nigeria (Enugu) | 16 | 1 | 1 | 28 |
| mystery | Nigeria (Enugu) | 16 | 1 | 3 | 4  |
| mystery | Nigeria (Enugu) | 16 | 1 | 3 | 7  |
| mystery | Nigeria (Enugu) | 16 | 1 | 3 | 27 |
| mystery | Nigeria (Enugu) | 2  | 3 | 6 | 1  |
| mystery | Nigeria (Enugu) | 2  | 3 | 6 | 1  |
| mystery | Nigeria (Enugu) | 4  | 1 | 2 | 9  |
| mystery | Nigeria (Enugu) | 11 | 2 | 5 | 1  |
| mystery | Nigeria (Enugu) | 14 | 1 | 3 | 5  |
| mystery | Nigeria (Enugu) | 11 | 2 | 5 | 1  |
| mystery | Nigeria (Enugu) | 11 | 2 | 5 | 1  |
| mystery | Nigeria (Enugu) | 1  | 3 | 1 | 21 |
| mystery | Nigeria (Enugu) | 1  | 3 | 1 | 59 |
| mystery | Nigeria (Enugu) | 4  | 1 | 2 | 1  |
| mystery | Nigeria (Enugu) | 4  | 1 | 2 | 4  |
| mystery | Nigeria (Enugu) | 4  | 1 | 2 | 9  |
| mystery | Nigeria (Enugu) | 4  | 1 | 2 | 36 |
| mystery | Nigeria (Enugu) | 5  | 1 | 2 | 7  |
| mystery | Nigeria (Enugu) | 5  | 1 | 2 | 8  |
| mystery | Nigeria (Enugu) | 5  | 1 | 2 | 17 |
| mystery | Nigeria (Enugu) | 5  | 2 | 3 | 12 |
| mystery | Nigeria (Enugu) | 7  | 2 | 4 | 6  |
| mystery | Nigeria (Enugu) | 14 | 1 | 3 | 4  |
| mystery | Nigeria (Enugu) | 15 | 2 | 1 | 5  |
| mystery | Nigeria (Enugu) | 15 | 2 | 3 | 10 |
| mystery | Nigeria (Enugu) | 16 | 1 | 3 | 2  |
| mystery | Nigeria (Enugu) | 4  | 1 | 2 | 23 |
| mystery | Nigeria (Enugu) | 5  | 1 | 2 | 37 |
| mystery | Nigeria (Enugu) | 12 | 2 | 5 | 10 |
| mystery | Nigeria (Enugu) | 4  | 1 | 2 | 8  |
| mystery | Nigeria (Enugu) | 5  | 1 | 2 | 8  |
| mystery | Nigeria (Enugu) | 6  | 2 | 1 | 11 |
| mystery | Nigeria (Enugu) | 8  | 2 | 4 | 5  |
| mystery | Nigeria (Enugu) | 12 | 3 | 7 | 6  |
| mystery | Nigeria (Enugu) | 13 | 3 | 7 | 3  |

|         |                 |    |   |   |    |
|---------|-----------------|----|---|---|----|
| mystery | Nigeria (Enugu) | 1  | 3 | 1 | 21 |
| mystery | Nigeria (Enugu) | 1  | 3 | 1 | 59 |
| mystery | Nigeria (Enugu) | 2  | 3 | 5 | 34 |
| mystery | Nigeria (Enugu) | 4  | 1 | 2 | 36 |
| mystery | Nigeria (Enugu) | 5  | 1 | 2 | 8  |
| mystery | Nigeria (Enugu) | 6  | 2 | 1 | 11 |
| mystery | Nigeria (Enugu) | 6  | 2 | 3 | 6  |
| mystery | Nigeria (Enugu) | 9  | 2 | 2 | 11 |
| mystery | Nigeria (Enugu) | 9  | 3 | 5 | 8  |
| mystery | Nigeria (Enugu) | 10 | 3 | 1 | 2  |
| mystery | Nigeria (Enugu) | 11 | 2 | 5 | 6  |
| mystery | Nigeria (Enugu) | 13 | 2 | 5 | 9  |
| mystery | Nigeria (Enugu) | 13 | 3 | 7 | 7  |
| mystery | Nigeria (Enugu) | 14 | 1 | 3 | 1  |
| mystery | Nigeria (Enugu) | 15 | 2 | 1 | 29 |
| mystery | Nigeria (Enugu) | 15 | 2 | 3 | 38 |
| mystery | Nigeria (Enugu) | 15 | 2 | 1 | 19 |
| mystery | Nigeria (Enugu) | 15 | 2 | 3 | 28 |
| mystery | Nigeria (Enugu) | 3  | 2 | 4 | 13 |
| mystery | Nigeria (Enugu) | 4  | 1 | 2 | 36 |
| mystery | Nigeria (Enugu) | 5  | 2 | 3 | 7  |
| mystery | Nigeria (Enugu) | 11 | 2 | 5 | 1  |
| mystery | Nigeria (Enugu) | 12 | 2 | 5 | 16 |
| mystery | Nigeria (Enugu) | 14 | 1 | 3 | 4  |
| mystery | Nigeria (Enugu) | 4  | 1 | 2 | 1  |
| mystery | Nigeria (Enugu) | 4  | 1 | 2 | 1  |
| mystery | Nigeria (Enugu) | 5  | 2 | 3 | 7  |
| mystery | Nigeria (Enugu) | 1  | 3 | 1 | 10 |
| mystery | Nigeria (Enugu) | 1  | 3 | 1 | 81 |
| mystery | Nigeria (Enugu) | 2  | 3 | 6 | 2  |
| mystery | Nigeria (Enugu) | 3  | 2 | 1 | 2  |
| mystery | Nigeria (Enugu) | 5  | 2 | 3 | 7  |
| mystery | Nigeria (Enugu) | 6  | 2 | 3 | 6  |
| mystery | Nigeria (Enugu) | 7  | 2 | 4 | 1  |
| mystery | Nigeria (Enugu) | 8  | 2 | 4 | 5  |
| mystery | Nigeria (Enugu) | 9  | 2 | 2 | 1  |
| mystery | Nigeria (Enugu) | 9  | 3 | 6 | 8  |
| mystery | Nigeria (Enugu) | 10 | 3 | 1 | 2  |
| mystery | Nigeria (Enugu) | 10 | 3 | 1 | 15 |
| mystery | Nigeria (Enugu) | 11 | 2 | 5 | 5  |
| mystery | Nigeria (Enugu) | 11 | 2 | 5 | 12 |
| mystery | Nigeria (Enugu) | 12 | 2 | 5 | 16 |
| mystery | Nigeria (Enugu) | 14 | 1 | 1 | 1  |
| mystery | Nigeria (Enugu) | 14 | 1 | 3 | 29 |
| mystery | Nigeria (Enugu) | 15 | 2 | 3 | 20 |
| mystery | Nigeria (Enugu) | 15 | 2 | 3 | 38 |
| mystery | Nigeria (Enugu) | 16 | 1 | 3 | 7  |
| mystery | Nigeria (Enugu) | 16 | 1 | 3 | 11 |
| mystery | Nigeria (Enugu) | 16 | 1 | 3 | 14 |
| mystery | Nigeria (Enugu) | 16 | 1 | 3 | 30 |

|         |                 |    |   |   |    |
|---------|-----------------|----|---|---|----|
| mystery | Nigeria (Enugu) | 4  | 1 | 2 | 9  |
| mystery | Nigeria (Enugu) | 4  | 1 | 2 | 53 |
| mystery | Nigeria (Enugu) | 5  | 1 | 2 | 31 |
| mystery | Nigeria (Enugu) | 5  | 1 | 2 | 59 |
| mystery | Nigeria (Enugu) | 6  | 2 | 3 | 36 |
| mystery | Nigeria (Enugu) | 7  | 2 | 4 | 1  |
| mystery | Nigeria (Enugu) | 7  | 2 | 4 | 25 |
| mystery | Nigeria (Enugu) | 9  | 3 | 5 | 8  |
| mystery | Nigeria (Enugu) | 10 | 3 | 1 | 33 |
| mystery | Nigeria (Enugu) | 10 | 3 | 1 | 71 |
| mystery | Nigeria (Enugu) | 11 | 2 | 5 | 1  |
| mystery | Nigeria (Enugu) | 11 | 2 | 5 | 5  |
| mystery | Nigeria (Enugu) | 11 | 2 | 5 | 6  |
| mystery | Nigeria (Enugu) | 12 | 2 | 5 | 3  |
| mystery | Nigeria (Enugu) | 12 | 2 | 5 | 16 |
| mystery | Nigeria (Enugu) | 12 | 2 | 5 | 28 |
| mystery | Nigeria (Enugu) | 14 | 1 | 1 | 1  |
| mystery | Nigeria (Enugu) | 14 | 1 | 3 | 4  |
| mystery | Nigeria (Enugu) | 16 | 1 | 3 | 38 |
| mystery | Nigeria (Enugu) | 3  | 2 | 1 | 2  |
| mystery | Nigeria (Enugu) | 6  | 2 | 1 | 11 |
| mystery | Nigeria (Enugu) | 6  | 2 | 3 | 6  |
| mystery | Nigeria (Enugu) | 9  | 2 | 2 | 1  |
| mystery | Nigeria (Enugu) | 9  | 2 | 2 | 11 |
| mystery | Nigeria (Enugu) | 11 | 2 | 5 | 1  |
| mystery | Nigeria (Enugu) | 16 | 1 | 3 | 2  |
| mystery | Nigeria (Enugu) | 7  | 2 | 4 | 1  |
| mystery | Nigeria (Enugu) | 11 | 2 | 5 | 1  |
| mystery | Nigeria (Enugu) | 11 | 2 | 5 | 6  |
| mystery | Nigeria (Enugu) | 4  | 1 | 2 | 19 |
| mystery | Nigeria (Enugu) | 6  | 2 | 3 | 9  |
| mystery | Nigeria (Enugu) | 15 | 2 | 3 | 38 |
| mystery | Nigeria (Enugu) | 5  | 2 | 3 | 12 |
| mystery | Nigeria (Enugu) | 9  | 2 | 2 | 10 |
| mystery | Nigeria (Enugu) | 15 | 2 | 1 | 19 |
| mystery | Nigeria (Enugu) | 5  | 1 | 2 | 57 |
| mystery | Nigeria (Enugu) | 1  | 3 | 1 | 60 |
| mystery | Nigeria (Enugu) | 2  | 3 | 5 | 30 |
| mystery | Nigeria (Enugu) | 4  | 1 | 2 | 1  |
| mystery | Nigeria (Enugu) | 9  | 3 | 5 | 11 |
| mystery | Nigeria (Enugu) | 4  | 1 | 2 | 1  |
| mystery | Nigeria (Enugu) | 4  | 1 | 2 | 36 |
| mystery | Nigeria (Enugu) | 5  | 1 | 2 | 31 |
| mystery | Nigeria (Enugu) | 9  | 3 | 6 | 8  |
| mystery | Nigeria (Enugu) | 12 | 2 | 5 | 16 |
| mystery | Nigeria (Enugu) | 14 | 1 | 3 | 9  |
| mystery | Nigeria (Enugu) | 15 | 2 | 1 | 5  |
| mystery | Nigeria (Enugu) | 5  | 1 | 2 | 57 |
| mystery | Nigeria (Enugu) | 1  | 3 | 1 | 81 |
| mystery | Nigeria (Enugu) | 3  | 2 | 4 | 42 |

|         |                 |    |   |   |    |
|---------|-----------------|----|---|---|----|
| mystery | Nigeria (Enugu) | 7  | 3 | 7 | 0  |
| mystery | Nigeria (Enugu) | 8  | 2 | 1 | 8  |
| mystery | Nigeria (Enugu) | 8  | 2 | 4 | 10 |
| mystery | Nigeria (Enugu) | 10 | 3 | 1 | 2  |
| mystery | Nigeria (Enugu) | 14 | 1 | 1 | 1  |
| mystery | Nigeria (Enugu) | 14 | 1 | 1 | 16 |
| mystery | Nigeria (Enugu) | 14 | 1 | 3 | 4  |
| mystery | Nigeria (Enugu) | 15 | 2 | 1 | 5  |
| mystery | Nigeria (Enugu) | 15 | 2 | 1 | 14 |
| mystery | Nigeria (Enugu) | 15 | 2 | 3 | 10 |
| mystery | Nigeria (Enugu) | 1  | 3 | 1 | 77 |
| mystery | Nigeria (Enugu) | 3  | 2 | 4 | 21 |
| mystery | Nigeria (Enugu) | 4  | 1 | 2 | 1  |
| mystery | Nigeria (Enugu) | 5  | 1 | 2 | 7  |
| mystery | Nigeria (Enugu) | 5  | 2 | 3 | 7  |
| mystery | Nigeria (Enugu) | 6  | 2 | 3 | 31 |
| mystery | Nigeria (Enugu) | 7  | 2 | 4 | 1  |
| mystery | Nigeria (Enugu) | 7  | 2 | 4 | 25 |
| mystery | Nigeria (Enugu) | 8  | 2 | 4 | 44 |
| mystery | Nigeria (Enugu) | 9  | 2 | 2 | 1  |
| mystery | Nigeria (Enugu) | 9  | 3 | 6 | 8  |
| mystery | Nigeria (Enugu) | 10 | 3 | 1 | 15 |
| mystery | Nigeria (Enugu) | 11 | 2 | 5 | 1  |
| mystery | Nigeria (Enugu) | 11 | 2 | 5 | 5  |
| mystery | Nigeria (Enugu) | 12 | 2 | 5 | 16 |
| mystery | Nigeria (Enugu) | 14 | 1 | 1 | 18 |
| mystery | Nigeria (Enugu) | 16 | 1 | 3 | 11 |
| mystery | Nigeria (Enugu) | 1  | 3 | 1 | 4  |
| mystery | Nigeria (Enugu) | 1  | 3 | 1 | 57 |
| mystery | Nigeria (Enugu) | 1  | 3 | 1 | 82 |
| mystery | Nigeria (Enugu) | 5  | 1 | 2 | 56 |
| mystery | Nigeria (Enugu) | 9  | 3 | 6 | 8  |
| mystery | Nigeria (Enugu) | 10 | 3 | 1 | 2  |
| mystery | Nigeria (Enugu) | 10 | 3 | 1 | 21 |
| mystery | Nigeria (Enugu) | 10 | 3 | 1 | 3  |
| mystery | Nigeria (Enugu) | 11 | 3 | 7 | 24 |
| mystery | Nigeria (Enugu) | 12 | 2 | 5 | 16 |
| mystery | Nigeria (Enugu) | 6  | 2 | 3 | 14 |
| mystery | Nigeria (Enugu) | 4  | 1 | 2 | 8  |
| mystery | Nigeria (Enugu) | 4  | 1 | 2 | 53 |
| mystery | Nigeria (Enugu) | 4  | 1 | 2 | 19 |
| mystery | Nigeria (Enugu) | 8  | 2 | 4 | 5  |
| mystery | Nigeria (Enugu) | 9  | 2 | 2 | 6  |
| mystery | Nigeria (Enugu) | 15 | 2 | 1 | 29 |
| mystery | Nigeria (Enugu) | 1  | 3 | 1 | 57 |
| mystery | Nigeria (Enugu) | 3  | 2 | 4 | 14 |
| mystery | Nigeria (Enugu) | 5  | 1 | 2 | 31 |
| mystery | Nigeria (Enugu) | 6  | 2 | 1 | 11 |
| mystery | Nigeria (Enugu) | 6  | 2 | 3 | 6  |
| mystery | Nigeria (Enugu) | 8  | 2 | 4 | 10 |

|         |                 |    |   |   |    |
|---------|-----------------|----|---|---|----|
| mystery | Nigeria (Enugu) | 9  | 2 | 2 | 1  |
| mystery | Nigeria (Enugu) | 11 | 2 | 5 | 1  |
| mystery | Nigeria (Enugu) | 11 | 2 | 5 | 5  |
| mystery | Nigeria (Enugu) | 13 | 3 | 7 | 9  |
| mystery | Nigeria (Enugu) | 15 | 2 | 1 | 7  |
| mystery | Nigeria (Enugu) | 4  | 1 | 2 | 4  |
| mystery | Nigeria (Enugu) | 4  | 2 | 3 | 3  |
| mystery | Nigeria (Enugu) | 3  | 2 | 4 | 7  |
| mystery | Nigeria (Enugu) | 4  | 1 | 2 | 23 |
| mystery | Nigeria (Enugu) | 5  | 1 | 2 | 7  |
| mystery | Nigeria (Enugu) | 5  | 1 | 2 | 17 |
| mystery | Nigeria (Enugu) | 5  | 1 | 2 | 22 |
| mystery | Nigeria (Enugu) | 6  | 2 | 1 | 28 |
| mystery | Nigeria (Enugu) | 6  | 2 | 3 | 1  |
| mystery | Nigeria (Enugu) | 7  | 2 | 4 | 20 |
| mystery | Nigeria (Enugu) | 7  | 2 | 4 | 25 |
| mystery | Nigeria (Enugu) | 10 | 3 | 1 | 33 |
| mystery | Nigeria (Enugu) | 11 | 2 | 5 | 1  |
| mystery | Nigeria (Enugu) | 11 | 2 | 5 | 5  |
| mystery | Nigeria (Enugu) | 11 | 2 | 5 | 6  |
| mystery | Nigeria (Enugu) | 11 | 2 | 5 | 11 |
| mystery | Nigeria (Enugu) | 13 | 2 | 3 | 16 |
| mystery | Nigeria (Enugu) | 13 | 2 | 5 | 9  |
| mystery | Nigeria (Enugu) | 13 | 2 | 5 | 25 |
| mystery | Nigeria (Enugu) | 15 | 2 | 1 | 5  |
| mystery | Nigeria (Enugu) | 15 | 2 | 1 | 19 |
| mystery | Nigeria (Enugu) | 15 | 2 | 3 | 20 |
| mystery | Nigeria (Enugu) | 15 | 2 | 3 | 34 |
| mystery | Nigeria (Enugu) | 15 | 2 | 1 | 19 |
| mystery | Nigeria (Enugu) | 3  | 2 | 4 | 7  |
| mystery | Nigeria (Enugu) | 6  | 2 | 3 | 37 |
| mystery | Nigeria (Enugu) | 7  | 2 | 4 | 1  |
| mystery | Nigeria (Enugu) | 8  | 2 | 4 | 5  |
| mystery | Nigeria (Enugu) | 15 | 2 | 1 | 5  |
| mystery | Nigeria (Enugu) | 15 | 2 | 3 | 28 |
| mystery | Nigeria (Enugu) | 1  | 3 | 1 | 77 |
| mystery | Nigeria (Enugu) | 2  | 3 | 2 | 5  |
| mystery | Nigeria (Enugu) | 4  | 1 | 2 | 53 |
| mystery | Nigeria (Enugu) | 5  | 1 | 2 | 57 |
| mystery | Nigeria (Enugu) | 5  | 1 | 2 | 59 |
| mystery | Nigeria (Enugu) | 5  | 2 | 3 | 12 |
| mystery | Nigeria (Enugu) | 6  | 2 | 1 | 11 |
| mystery | Nigeria (Enugu) | 6  | 2 | 3 | 37 |
| mystery | Nigeria (Enugu) | 7  | 2 | 4 | 1  |
| mystery | Nigeria (Enugu) | 7  | 2 | 4 | 25 |
| mystery | Nigeria (Enugu) | 9  | 2 | 2 | 1  |
| mystery | Nigeria (Enugu) | 11 | 2 | 5 | 1  |
| mystery | Nigeria (Enugu) | 11 | 2 | 5 | 5  |
| mystery | Nigeria (Enugu) | 12 | 2 | 5 | 10 |
| mystery | Nigeria (Enugu) | 13 | 2 | 5 | 9  |



|         |                 |    |   |   |    |
|---------|-----------------|----|---|---|----|
| mystery | Nigeria (Enugu) | 15 | 2 | 1 | 14 |
| mystery | Nigeria (Enugu) | 15 | 2 | 3 | 38 |
| mystery | Nigeria (Enugu) | 1  | 3 | 1 | 4  |
| mystery | Nigeria (Enugu) | 1  | 3 | 1 | 12 |
| mystery | Nigeria (Enugu) | 1  | 3 | 1 | 13 |
| mystery | Nigeria (Enugu) | 1  | 3 | 1 | 33 |
| mystery | Nigeria (Enugu) | 1  | 3 | 1 | 36 |
| mystery | Nigeria (Enugu) | 1  | 3 | 1 | 38 |
| mystery | Nigeria (Enugu) | 1  | 3 | 1 | 59 |
| mystery | Nigeria (Enugu) | 1  | 3 | 1 | 60 |
| mystery | Nigeria (Enugu) | 1  | 3 | 1 | 69 |
| mystery | Nigeria (Enugu) | 1  | 3 | 1 | 77 |
| mystery | Nigeria (Enugu) | 1  | 3 | 1 | 80 |
| mystery | Nigeria (Enugu) | 1  | 3 | 1 | 82 |
| mystery | Nigeria (Enugu) | 1  | 3 | 1 | 83 |
| mystery | Nigeria (Enugu) | 1  | 3 | 1 | 84 |
| mystery | Nigeria (Enugu) | 2  | 3 | 2 | 5  |
| mystery | Nigeria (Enugu) | 2  | 3 | 6 | 2  |
| mystery | Nigeria (Enugu) | 3  | 2 | 1 | 2  |
| mystery | Nigeria (Enugu) | 3  | 2 | 4 | 2  |
| mystery | Nigeria (Enugu) | 3  | 2 | 4 | 8  |
| mystery | Nigeria (Enugu) | 3  | 2 | 4 | 14 |
| mystery | Nigeria (Enugu) | 3  | 2 | 4 | 15 |
| mystery | Nigeria (Enugu) | 3  | 2 | 4 | 42 |
| mystery | Nigeria (Enugu) | 3  | 2 | 6 | 6  |
| mystery | Nigeria (Enugu) | 4  | 1 | 2 | 15 |
| mystery | Nigeria (Enugu) | 4  | 1 | 2 | 23 |
| mystery | Nigeria (Enugu) | 4  | 1 | 2 | 53 |
| mystery | Nigeria (Enugu) | 4  | 2 | 3 | 3  |
| mystery | Nigeria (Enugu) | 5  | 1 | 2 | 8  |
| mystery | Nigeria (Enugu) | 5  | 1 | 2 | 46 |
| mystery | Nigeria (Enugu) | 5  | 1 | 2 | 56 |
| mystery | Nigeria (Enugu) | 5  | 1 | 2 | 57 |
| mystery | Nigeria (Enugu) | 5  | 1 | 2 | 59 |
| mystery | Nigeria (Enugu) | 5  | 2 | 1 | 0  |
| mystery | Nigeria (Enugu) | 5  | 2 | 3 | 12 |
| mystery | Nigeria (Enugu) | 6  | 2 | 1 | 1  |
| mystery | Nigeria (Enugu) | 6  | 2 | 1 | 11 |
| mystery | Nigeria (Enugu) | 6  | 2 | 3 | 1  |
| mystery | Nigeria (Enugu) | 6  | 2 | 3 | 9  |
| mystery | Nigeria (Enugu) | 6  | 2 | 3 | 25 |
| mystery | Nigeria (Enugu) | 6  | 2 | 3 | 27 |
| mystery | Nigeria (Enugu) | 6  | 2 | 3 | 31 |
| mystery | Nigeria (Enugu) | 6  | 2 | 3 | 37 |
| mystery | Nigeria (Enugu) | 7  | 2 | 4 | 1  |
| mystery | Nigeria (Enugu) | 7  | 2 | 4 | 22 |
| mystery | Nigeria (Enugu) | 8  | 2 | 1 | 8  |
| mystery | Nigeria (Enugu) | 8  | 2 | 4 | 5  |
| mystery | Nigeria (Enugu) | 8  | 2 | 4 | 10 |
| mystery | Nigeria (Enugu) | 8  | 2 | 4 | 16 |

|         |                 |    |   |   |    |
|---------|-----------------|----|---|---|----|
| mystery | Nigeria (Enugu) | 8  | 2 | 4 | 23 |
| mystery | Nigeria (Enugu) | 9  | 2 | 2 | 2  |
| mystery | Nigeria (Enugu) | 9  | 2 | 2 | 10 |
| mystery | Nigeria (Enugu) | 9  | 2 | 2 | 11 |
| mystery | Nigeria (Enugu) | 9  | 3 | 5 | 19 |
| mystery | Nigeria (Enugu) | 9  | 3 | 6 | 8  |
| mystery | Nigeria (Enugu) | 10 | 3 | 1 | 1  |
| mystery | Nigeria (Enugu) | 10 | 3 | 1 | 2  |
| mystery | Nigeria (Enugu) | 10 | 3 | 1 | 5  |
| mystery | Nigeria (Enugu) | 10 | 3 | 1 | 8  |
| mystery | Nigeria (Enugu) | 10 | 3 | 1 | 14 |
| mystery | Nigeria (Enugu) | 10 | 3 | 1 | 21 |
| mystery | Nigeria (Enugu) | 10 | 3 | 1 | 31 |
| mystery | Nigeria (Enugu) | 10 | 3 | 1 | 33 |
| mystery | Nigeria (Enugu) | 10 | 3 | 1 | 37 |
| mystery | Nigeria (Enugu) | 10 | 3 | 1 | 53 |
| mystery | Nigeria (Enugu) | 10 | 3 | 1 | 66 |
| mystery | Nigeria (Enugu) | 10 | 3 | 1 | 71 |
| mystery | Nigeria (Enugu) | 10 | 3 | 1 | 78 |
| mystery | Nigeria (Enugu) | 10 | 3 | 1 | 79 |
| mystery | Nigeria (Enugu) | 11 | 2 | 5 | 1  |
| mystery | Nigeria (Enugu) | 11 | 2 | 5 | 3  |
| mystery | Nigeria (Enugu) | 11 | 2 | 5 | 5  |
| mystery | Nigeria (Enugu) | 11 | 2 | 5 | 6  |
| mystery | Nigeria (Enugu) | 11 | 2 | 5 | 11 |
| mystery | Nigeria (Enugu) | 11 | 2 | 5 | 12 |
| mystery | Nigeria (Enugu) | 11 | 2 | 5 | 22 |
| mystery | Nigeria (Enugu) | 11 | 2 | 5 | 26 |
| mystery | Nigeria (Enugu) | 11 | 3 | 7 | 15 |
| mystery | Nigeria (Enugu) | 12 | 2 | 5 | 10 |
| mystery | Nigeria (Enugu) | 12 | 2 | 5 | 16 |
| mystery | Nigeria (Enugu) | 12 | 3 | 7 | 18 |
| mystery | Nigeria (Enugu) | 12 | 3 | 7 | 23 |
| mystery | Nigeria (Enugu) | 13 | 2 | 3 | 16 |
| mystery | Nigeria (Enugu) | 13 | 3 | 7 | 3  |
| mystery | Nigeria (Enugu) | 13 | 2 | 5 | 9  |
| mystery | Nigeria (Enugu) | 13 | 3 | 7 | 4  |
| mystery | Nigeria (Enugu) | 13 | 3 | 7 | 8  |
| mystery | Nigeria (Enugu) | 13 | 3 | 7 | 28 |
| mystery | Nigeria (Enugu) | 13 | 3 | 7 | 31 |
| mystery | Nigeria (Enugu) | 13 | 3 | 7 | 33 |
| mystery | Nigeria (Enugu) | 14 | 1 | 1 | 1  |
| mystery | Nigeria (Enugu) | 14 | 1 | 1 | 6  |
| mystery | Nigeria (Enugu) | 14 | 1 | 1 | 7  |
| mystery | Nigeria (Enugu) | 14 | 1 | 3 | 4  |
| mystery | Nigeria (Enugu) | 14 | 1 | 3 | 5  |
| mystery | Nigeria (Enugu) | 14 | 1 | 3 | 9  |
| mystery | Nigeria (Enugu) | 14 | 1 | 3 | 10 |
| mystery | Nigeria (Enugu) | 14 | 1 | 3 | 23 |
| mystery | Nigeria (Enugu) | 14 | 1 | 3 | 35 |

|         |                 |    |   |   |    |
|---------|-----------------|----|---|---|----|
| mystery | Nigeria (Enugu) | 15 | 2 | 1 | 4  |
| mystery | Nigeria (Enugu) | 15 | 2 | 1 | 5  |
| mystery | Nigeria (Enugu) | 15 | 2 | 1 | 7  |
| mystery | Nigeria (Enugu) | 15 | 2 | 1 | 14 |
| mystery | Nigeria (Enugu) | 15 | 2 | 1 | 17 |
| mystery | Nigeria (Enugu) | 15 | 2 | 1 | 29 |
| mystery | Nigeria (Enugu) | 15 | 2 | 3 | 10 |
| mystery | Nigeria (Enugu) | 15 | 2 | 3 | 15 |
| mystery | Nigeria (Enugu) | 15 | 2 | 3 | 20 |
| mystery | Nigeria (Enugu) | 15 | 2 | 3 | 30 |
| mystery | Nigeria (Enugu) | 15 | 2 | 3 | 38 |
| mystery | Nigeria (Enugu) | 16 | 1 | 1 | 7  |
| mystery | Nigeria (Enugu) | 16 | 1 | 3 | 6  |
| mystery | Nigeria (Enugu) | 16 | 1 | 3 | 7  |
| mystery | Nigeria (Enugu) | 16 | 1 | 3 | 11 |
| mystery | Nigeria (Enugu) | 16 | 1 | 3 | 30 |
| mystery | Nigeria (Enugu) | 16 | 1 | 3 | 38 |
| mystery | Nigeria (Enugu) | 5  | 1 | 2 | 2  |
| mystery | Nigeria (Enugu) | 4  | 1 | 2 | 53 |
| mystery | Nigeria (Enugu) | 5  | 1 | 2 | 7  |
| mystery | Nigeria (Enugu) | 13 | 2 | 5 | 9  |
| mystery | Nigeria (Enugu) | 14 | 1 | 3 | 4  |
| mystery | Nigeria (Enugu) | 14 | 1 | 3 | 29 |
| mystery | Nigeria (Enugu) | 15 | 2 | 3 | 38 |
| mystery | Nigeria (Enugu) | 1  | 3 | 1 | 33 |
| mystery | Nigeria (Enugu) | 2  | 3 | 6 | 1  |
| mystery | Nigeria (Enugu) | 4  | 1 | 2 | 36 |
| mystery | Nigeria (Enugu) | 5  | 1 | 2 | 8  |
| mystery | Nigeria (Enugu) | 5  | 1 | 2 | 57 |
| mystery | Nigeria (Enugu) | 6  | 2 | 1 | 11 |
| mystery | Nigeria (Enugu) | 6  | 2 | 3 | 37 |
| mystery | Nigeria (Enugu) | 7  | 2 | 4 | 6  |
| mystery | Nigeria (Enugu) | 8  | 2 | 4 | 5  |
| mystery | Nigeria (Enugu) | 10 | 3 | 1 | 21 |
| mystery | Nigeria (Enugu) | 10 | 3 | 1 | 33 |
| mystery | Nigeria (Enugu) | 11 | 2 | 5 | 6  |
| mystery | Nigeria (Enugu) | 11 | 2 | 5 | 11 |
| mystery | Nigeria (Enugu) | 12 | 3 | 7 | 23 |
| mystery | Nigeria (Enugu) | 13 | 3 | 7 | 33 |
| mystery | Nigeria (Enugu) | 14 | 1 | 3 | 9  |
| mystery | Nigeria (Enugu) | 15 | 2 | 3 | 38 |
| mystery | Nigeria (Enugu) | 16 | 1 | 3 | 4  |
| mystery | Nigeria (Enugu) | 16 | 1 | 3 | 11 |
| mystery | Nigeria (Enugu) | 2  | 3 | 5 | 33 |
| mystery | Nigeria (Enugu) | 5  | 1 | 2 | 8  |
| mystery | Nigeria (Enugu) | 5  | 1 | 2 | 31 |
| mystery | Nigeria (Enugu) | 11 | 2 | 5 | 1  |
| mystery | Nigeria (Enugu) | 14 | 1 | 3 | 4  |
| mystery | Nigeria (Enugu) | 2  | 3 | 5 | 33 |
| mystery | Nigeria (Enugu) | 6  | 2 | 3 | 6  |

|         |                 |    |   |   |    |
|---------|-----------------|----|---|---|----|
| mystery | Nigeria (Enugu) | 10 | 3 | 1 | 15 |
| mystery | Nigeria (Enugu) | 16 | 1 | 3 | 2  |
| mystery | Nigeria (Enugu) | 1  | 3 | 1 | 10 |
| mystery | Nigeria (Enugu) | 3  | 2 | 4 | 7  |
| mystery | Nigeria (Enugu) | 3  | 2 | 4 | 42 |
| mystery | Nigeria (Enugu) | 4  | 1 | 2 | 1  |
| mystery | Nigeria (Enugu) | 4  | 1 | 2 | 9  |
| mystery | Nigeria (Enugu) | 5  | 1 | 2 | 8  |
| mystery | Nigeria (Enugu) | 6  | 2 | 1 | 11 |
| mystery | Nigeria (Enugu) | 7  | 2 | 4 | 6  |
| mystery | Nigeria (Enugu) | 10 | 3 | 1 | 2  |
| mystery | Nigeria (Enugu) | 10 | 3 | 1 | 8  |
| mystery | Nigeria (Enugu) | 10 | 3 | 1 | 15 |
| mystery | Nigeria (Enugu) | 10 | 3 | 1 | 33 |
| mystery | Nigeria (Enugu) | 10 | 3 | 1 | 37 |
| mystery | Nigeria (Enugu) | 10 | 3 | 1 | 71 |
| mystery | Nigeria (Enugu) | 11 | 2 | 5 | 6  |
| mystery | Nigeria (Enugu) | 11 | 2 | 5 | 12 |
| mystery | Nigeria (Enugu) | 11 | 2 | 5 | 26 |
| mystery | Nigeria (Enugu) | 12 | 2 | 5 | 16 |
| mystery | Nigeria (Enugu) | 13 | 3 | 7 | 33 |
| mystery | Nigeria (Enugu) | 15 | 2 | 3 | 38 |
| mystery | Nigeria (Enugu) | 16 | 1 | 3 | 2  |
| mystery | Nigeria (Enugu) | 3  | 2 | 4 | 8  |
| mystery | Nigeria (Enugu) | 4  | 1 | 2 | 9  |
| mystery | Nigeria (Enugu) | 5  | 1 | 2 | 8  |
| mystery | Nigeria (Enugu) | 5  | 1 | 2 | 11 |
| mystery | Nigeria (Enugu) | 6  | 2 | 3 | 25 |
| mystery | Nigeria (Enugu) | 6  | 2 | 3 | 31 |
| mystery | Nigeria (Enugu) | 7  | 2 | 4 | 6  |
| mystery | Nigeria (Enugu) | 8  | 2 | 4 | 5  |
| mystery | Nigeria (Enugu) | 10 | 3 | 1 | 21 |
| mystery | Nigeria (Enugu) | 11 | 2 | 5 | 5  |
| mystery | Nigeria (Enugu) | 15 | 2 | 3 | 30 |
| mystery | Nigeria (Enugu) | 16 | 1 | 3 | 26 |
| mystery | Nigeria (Enugu) | 3  | 2 | 1 | 2  |
| mystery | Nigeria (Enugu) | 3  | 2 | 4 | 14 |
| mystery | Nigeria (Enugu) | 3  | 2 | 6 | 6  |
| mystery | Nigeria (Enugu) | 4  | 1 | 2 | 8  |
| mystery | Nigeria (Enugu) | 5  | 1 | 2 | 8  |
| mystery | Nigeria (Enugu) | 6  | 2 | 1 | 28 |
| mystery | Nigeria (Enugu) | 6  | 2 | 3 | 6  |
| mystery | Nigeria (Enugu) | 8  | 2 | 4 | 23 |
| mystery | Nigeria (Enugu) | 9  | 3 | 5 | 20 |
| mystery | Nigeria (Enugu) | 11 | 2 | 5 | 1  |
| mystery | Nigeria (Enugu) | 11 | 2 | 5 | 6  |
| mystery | Nigeria (Enugu) | 14 | 1 | 3 | 32 |
| mystery | Nigeria (Enugu) | 15 | 2 | 1 | 17 |
| mystery | Nigeria (Enugu) | 15 | 2 | 3 | 34 |
| mystery | Nigeria (Enugu) | 1  | 3 | 1 | 82 |

|         |                 |    |   |   |    |
|---------|-----------------|----|---|---|----|
| mystery | Nigeria (Enugu) | 3  | 2 | 4 | 2  |
| mystery | Nigeria (Enugu) | 3  | 2 | 6 | 6  |
| mystery | Nigeria (Enugu) | 4  | 1 | 2 | 1  |
| mystery | Nigeria (Enugu) | 5  | 1 | 2 | 31 |
| mystery | Nigeria (Enugu) | 5  | 2 | 3 | 12 |
| mystery | Nigeria (Enugu) | 6  | 2 | 3 | 14 |
| mystery | Nigeria (Enugu) | 8  | 2 | 4 | 5  |
| mystery | Nigeria (Enugu) | 10 | 3 | 1 | 2  |
| mystery | Nigeria (Enugu) | 10 | 3 | 1 | 31 |
| mystery | Nigeria (Enugu) | 10 | 3 | 1 | 71 |
| mystery | Nigeria (Enugu) | 12 | 2 | 5 | 16 |
| mystery | Nigeria (Enugu) | 14 | 1 | 3 | 32 |
| mystery | Nigeria (Enugu) | 15 | 2 | 1 | 7  |
| mystery | Nigeria (Enugu) | 10 | 3 | 1 | 79 |
| mystery | Nigeria (Enugu) | 5  | 1 | 2 | 22 |
| mystery | Nigeria (Enugu) | 1  | 3 | 1 | 4  |
| mystery | Nigeria (Enugu) | 1  | 3 | 1 | 10 |
| mystery | Nigeria (Enugu) | 1  | 3 | 1 | 12 |
| mystery | Nigeria (Enugu) | 1  | 3 | 1 | 13 |
| mystery | Nigeria (Enugu) | 1  | 3 | 1 | 38 |
| mystery | Nigeria (Enugu) | 1  | 3 | 1 | 39 |
| mystery | Nigeria (Enugu) | 1  | 3 | 1 | 57 |
| mystery | Nigeria (Enugu) | 1  | 3 | 1 | 68 |
| mystery | Nigeria (Enugu) | 1  | 3 | 1 | 69 |
| mystery | Nigeria (Enugu) | 1  | 3 | 1 | 70 |
| mystery | Nigeria (Enugu) | 1  | 3 | 1 | 74 |
| mystery | Nigeria (Enugu) | 1  | 3 | 1 | 81 |
| mystery | Nigeria (Enugu) | 1  | 3 | 1 | 82 |
| mystery | Nigeria (Enugu) | 2  | 3 | 2 | 8  |
| mystery | Nigeria (Enugu) | 2  | 3 | 4 | 3  |
| mystery | Nigeria (Enugu) | 2  | 3 | 5 | 4  |
| mystery | Nigeria (Enugu) | 2  | 3 | 5 | 25 |
| mystery | Nigeria (Enugu) | 2  | 3 | 6 | 1  |
| mystery | Nigeria (Enugu) | 2  | 3 | 6 | 2  |
| mystery | Nigeria (Enugu) | 3  | 2 | 4 | 26 |
| mystery | Nigeria (Enugu) | 4  | 1 | 2 | 9  |
| mystery | Nigeria (Enugu) | 4  | 1 | 2 | 15 |
| mystery | Nigeria (Enugu) | 4  | 1 | 2 | 19 |
| mystery | Nigeria (Enugu) | 4  | 1 | 2 | 53 |
| mystery | Nigeria (Enugu) | 5  | 1 | 2 | 11 |
| mystery | Nigeria (Enugu) | 5  | 1 | 2 | 27 |
| mystery | Nigeria (Enugu) | 6  | 2 | 1 | 11 |
| mystery | Nigeria (Enugu) | 6  | 2 | 1 | 13 |
| mystery | Nigeria (Enugu) | 6  | 2 | 1 | 15 |
| mystery | Nigeria (Enugu) | 6  | 2 | 3 | 14 |
| mystery | Nigeria (Enugu) | 6  | 2 | 3 | 39 |
| mystery | Nigeria (Enugu) | 16 | 1 | 3 | 38 |
| mystery | Nigeria (Enugu) | 9  | 2 | 2 | 2  |
| mystery | Nigeria (Enugu) | 9  | 2 | 2 | 7  |
| mystery | Nigeria (Enugu) | 9  | 2 | 2 | 10 |

|         |                 |    |   |   |    |
|---------|-----------------|----|---|---|----|
| mystery | Nigeria (Enugu) | 11 | 2 | 5 | 5  |
| mystery | Nigeria (Enugu) | 9  | 3 | 3 | 3  |
| mystery | Nigeria (Enugu) | 9  | 3 | 5 | 8  |
| mystery | Nigeria (Enugu) | 9  | 3 | 5 | 11 |
| mystery | Nigeria (Enugu) | 9  | 3 | 5 | 31 |
| mystery | Nigeria (Enugu) | 9  | 3 | 6 | 8  |
| mystery | Nigeria (Enugu) | 10 | 3 | 1 | 20 |
| mystery | Nigeria (Enugu) | 10 | 3 | 1 | 25 |
| mystery | Nigeria (Enugu) | 10 | 3 | 1 | 33 |
| mystery | Nigeria (Enugu) | 10 | 3 | 1 | 66 |
| mystery | Nigeria (Enugu) | 10 | 3 | 1 | 72 |
| mystery | Nigeria (Enugu) | 11 | 2 | 5 | 11 |
| mystery | Nigeria (Enugu) | 11 | 3 | 7 | 27 |
| mystery | Nigeria (Enugu) | 12 | 2 | 5 | 4  |
| mystery | Nigeria (Enugu) | 12 | 2 | 5 | 24 |
| mystery | Nigeria (Enugu) | 12 | 3 | 7 | 12 |
| mystery | Nigeria (Enugu) | 13 | 2 | 3 | 16 |
| mystery | Nigeria (Enugu) | 13 | 3 | 7 | 3  |
| mystery | Nigeria (Enugu) | 13 | 3 | 7 | 4  |
| mystery | Nigeria (Enugu) | 13 | 3 | 7 | 9  |
| mystery | Nigeria (Enugu) | 13 | 3 | 7 | 32 |
| mystery | Nigeria (Enugu) | 14 | 1 | 1 | 5  |
| mystery | Nigeria (Enugu) | 14 | 1 | 1 | 6  |
| mystery | Nigeria (Enugu) | 14 | 1 | 1 | 6  |
| mystery | Nigeria (Enugu) | 14 | 1 | 1 | 7  |
| mystery | Nigeria (Enugu) | 14 | 1 | 1 | 15 |
| mystery | Nigeria (Enugu) | 14 | 1 | 3 | 1  |
| mystery | Nigeria (Enugu) | 14 | 1 | 3 | 5  |
| mystery | Nigeria (Enugu) | 14 | 1 | 3 | 9  |
| mystery | Nigeria (Enugu) | 14 | 1 | 3 | 25 |
| mystery | Nigeria (Enugu) | 14 | 1 | 3 | 35 |
| mystery | Nigeria (Enugu) | 15 | 2 | 1 | 4  |
| mystery | Nigeria (Enugu) | 15 | 2 | 1 | 7  |
| mystery | Nigeria (Enugu) | 15 | 2 | 1 | 14 |
| mystery | Nigeria (Enugu) | 15 | 2 | 1 | 29 |
| mystery | Nigeria (Enugu) | 15 | 2 | 3 | 15 |
| mystery | Nigeria (Enugu) | 15 | 2 | 3 | 38 |
| mystery | Nigeria (Enugu) | 16 | 1 | 1 | 17 |
| mystery | Nigeria (Enugu) | 16 | 1 | 1 | 28 |
| mystery | Nigeria (Enugu) | 16 | 1 | 3 | 7  |
| mystery | Nigeria (Enugu) | 16 | 1 | 3 | 26 |
| mystery | Nigeria (Enugu) | 16 | 1 | 3 | 31 |
| mystery | Nigeria (Enugu) | 13 | 3 | 7 | 8  |
| mystery | Nigeria (Enugu) | 3  | 2 | 4 | 13 |
| mystery | Nigeria (Enugu) | 4  | 1 | 2 | 4  |
| mystery | Nigeria (Enugu) | 5  | 1 | 2 | 33 |
| mystery | Nigeria (Enugu) | 6  | 2 | 1 | 28 |
| mystery | Nigeria (Enugu) | 7  | 2 | 4 | 27 |
| mystery | Nigeria (Enugu) | 13 | 2 | 5 | 25 |
| mystery | Nigeria (Enugu) | 3  | 1 | 2 | 0  |

|         |                 |    |   |   |    |
|---------|-----------------|----|---|---|----|
| mystery | Nigeria (Enugu) | 4  | 1 | 2 | 9  |
| mystery | Nigeria (Enugu) | 5  | 1 | 2 | 8  |
| mystery | Nigeria (Enugu) | 5  | 1 | 2 | 59 |
| mystery | Nigeria (Enugu) | 15 | 2 | 3 | 38 |
| mystery | Nigeria (Enugu) | 6  | 2 | 1 | 28 |
| mystery | Nigeria (Enugu) | 9  | 3 | 5 | 31 |
| mystery | Nigeria (Enugu) | 15 | 2 | 1 | 5  |
| mystery | Nigeria (Enugu) | 1  | 3 | 1 | 38 |
| mystery | Nigeria (Enugu) | 2  | 3 | 2 | 7  |
| mystery | Nigeria (Enugu) | 4  | 2 | 3 | 2  |
| mystery | Nigeria (Enugu) | 5  | 1 | 2 | 2  |
| mystery | Nigeria (Enugu) | 5  | 1 | 2 | 31 |
| mystery | Nigeria (Enugu) | 6  | 2 | 1 | 1  |
| mystery | Nigeria (Enugu) | 6  | 2 | 1 | 11 |
| mystery | Nigeria (Enugu) | 6  | 2 | 3 | 14 |
| mystery | Nigeria (Enugu) | 7  | 2 | 4 | 4  |
| mystery | Nigeria (Enugu) | 7  | 3 | 5 | 0  |
| mystery | Nigeria (Enugu) | 8  | 2 | 1 | 0  |
| mystery | Nigeria (Enugu) | 9  | 2 | 1 | 0  |
| mystery | Nigeria (Enugu) | 9  | 2 | 5 | 0  |
| mystery | Nigeria (Enugu) | 9  | 3 | 5 | 31 |
| mystery | Nigeria (Enugu) | 10 | 3 | 1 | 21 |
| mystery | Nigeria (Enugu) | 10 | 3 | 1 | 53 |
| mystery | Nigeria (Enugu) | 10 | 3 | 1 | 72 |
| mystery | Nigeria (Enugu) | 11 | 2 | 5 | 12 |
| mystery | Nigeria (Enugu) | 12 | 2 | 5 | 3  |
| mystery | Nigeria (Enugu) | 13 | 2 | 3 | 16 |
| mystery | Nigeria (Enugu) | 13 | 2 | 5 | 25 |
| mystery | Nigeria (Enugu) | 16 | 1 | 3 | 2  |
| mystery | Nigeria (Enugu) | 16 | 1 | 3 | 11 |
| mystery | Nigeria (Enugu) | 16 | 1 | 3 | 26 |
| mystery | Nigeria (Enugu) | 4  | 1 | 2 | 1  |
| mystery | Nigeria (Enugu) | 7  | 2 | 4 | 1  |
| mystery | Nigeria (Enugu) | 2  | 3 | 5 | 27 |
| mystery | Nigeria (Enugu) | 4  | 1 | 2 | 53 |
| mystery | Nigeria (Enugu) | 5  | 1 | 2 | 21 |
| mystery | Nigeria (Enugu) | 5  | 1 | 2 | 49 |
| mystery | Nigeria (Enugu) | 6  | 2 | 1 | 15 |
| mystery | Nigeria (Enugu) | 6  | 2 | 1 | 26 |
| mystery | Nigeria (Enugu) | 10 | 3 | 1 | 21 |
| mystery | Nigeria (Enugu) | 12 | 2 | 5 | 3  |
| mystery | Nigeria (Enugu) | 12 | 2 | 5 | 4  |
| mystery | Nigeria (Enugu) | 12 | 2 | 5 | 24 |
| mystery | Nigeria (Enugu) | 13 | 3 | 7 | 1  |
| mystery | Nigeria (Enugu) | 14 | 1 | 3 | 4  |
| mystery | Nigeria (Enugu) | 14 | 1 | 3 | 25 |
| mystery | Nigeria (Enugu) | 16 | 1 | 1 | 7  |
| mystery | Nigeria (Enugu) | 1  | 3 | 1 | 75 |
| mystery | Nigeria (Enugu) | 6  | 2 | 3 | 14 |
| mystery | Nigeria (Enugu) | 1  | 3 | 1 | 21 |

|         |                 |    |   |    |    |
|---------|-----------------|----|---|----|----|
| mystery | Nigeria (Enugu) | 1  | 3 | 1  | 63 |
| mystery | Nigeria (Enugu) | 2  | 3 | 2  | 5  |
| mystery | Nigeria (Enugu) | 2  | 3 | 2  | 8  |
| mystery | Nigeria (Enugu) | 4  | 1 | 2  | 9  |
| mystery | Nigeria (Enugu) | 5  | 1 | 2  | 2  |
| mystery | Nigeria (Enugu) | 5  | 1 | 2  | 21 |
| mystery | Nigeria (Enugu) | 5  | 1 | 2  | 33 |
| mystery | Nigeria (Enugu) | 5  | 1 | 2  | 59 |
| mystery | Nigeria (Enugu) | 7  | 2 | 4  | 22 |
| mystery | Nigeria (Enugu) | 9  | 3 | 3  | 3  |
| mystery | Nigeria (Enugu) | 14 | 1 | 3  | 21 |
| mystery | Nigeria (Enugu) | 5  | 2 | 3  | 12 |
| mystery | Nigeria (Enugu) | 5  | 2 | 1  | 0  |
| mystery | Nigeria (Enugu) | 9  | 2 | 1  | 0  |
| mystery | Nigeria (Enugu) | 3  | 2 | 4  | 39 |
| mystery | Nigeria (Enugu) | 1  | 3 | 1  | 77 |
| mystery | Nigeria (Enugu) | 7  | 2 | 4  | 1  |
| mystery | Nigeria (Enugu) | 16 | 1 | 3  | 7  |
| mystery | Nigeria (Enugu) | 5  | 1 | 2  | 7  |
| mystery | Nigeria (Enugu) | 5  | 1 | 2  | 22 |
| mystery | Nigeria (Enugu) | 2  | 3 | 5  | 28 |
| mystery | Nigeria (Enugu) | 6  | 2 | 3  | 37 |
| mystery | Nigeria (Enugu) | 13 | 3 | 7  | 28 |
| mystery | Nigeria (Enugu) | 1  | 3 | 1  | 81 |
| mystery | Nigeria (Enugu) | 2  | 3 | 2  | 7  |
| mystery | Nigeria (Enugu) | 4  | 1 | 2  | 19 |
| mystery | Nigeria (Enugu) | 5  | 1 | 2  | 11 |
| mystery | Nigeria (Enugu) | 5  | 2 | 1  | 0  |
| mystery | Nigeria (Enugu) | 6  | 2 | 1  | 1  |
| mystery | Nigeria (Enugu) | 6  | 2 | 1  | 11 |
| mystery | Nigeria (Enugu) | 6  | 2 | 3  | 14 |
| mystery | Nigeria (Enugu) | 7  | 2 | 4  | 4  |
| mystery | Nigeria (Enugu) | 9  | 2 | 1  | 0  |
| mystery | Nigeria (Enugu) | 10 | 3 | 1  | 21 |
| mystery | Nigeria (Enugu) | 10 | 3 | 1  | 72 |
| mystery | Nigeria (Enugu) | 13 | 2 | 3  | 16 |
| mystery | Nigeria (Enugu) | 13 | 2 | 5  | 25 |
| mystery | Nigeria (Enugu) | 14 | 1 | 1  | 1  |
| mystery | Nigeria (Enugu) | 14 | 1 | 3  | 4  |
| mystery | Nigeria (Enugu) | 14 | 1 | 3  | 10 |
| mystery | Nigeria (Enugu) | 16 | 1 | 3  | 11 |
| mystery | Nigeria (Enugu) | 1  | 3 | 1  | 38 |
| mystery | Nigeria (Enugu) | 1  | 3 | 1  | 60 |
| mystery | Nigeria (Enugu) | 1  | 3 | 1  | 63 |
| mystery | Nigeria (Enugu) | 2  | 3 | 2  | 7  |
| mystery | Nigeria (Enugu) | 2  | 3 | 5  | 33 |
| mystery | Nigeria (Enugu) | 3  | 2 | 4  | 21 |
| mystery | Nigeria (Enugu) | 3  | 2 | 4  | 39 |
| mystery | Nigeria (Enugu) | 3  | 2 | 4  | 42 |
| mystery | Nigeria (Enugu) | 3  | 3 | 71 | 0  |



|         |                 |    |   |   |    |
|---------|-----------------|----|---|---|----|
| mystery | Nigeria (Enugu) | 4  | 1 | 2 | 4  |
| mystery | Nigeria (Enugu) | 4  | 1 | 2 | 18 |
| mystery | Nigeria (Enugu) | 4  | 1 | 2 | 35 |
| mystery | Nigeria (Enugu) | 4  | 1 | 2 | 53 |
| mystery | Nigeria (Enugu) | 5  | 1 | 2 | 0  |
| mystery | Nigeria (Enugu) | 5  | 1 | 2 | 7  |
| mystery | Nigeria (Enugu) | 6  | 2 | 1 | 1  |
| mystery | Nigeria (Enugu) | 6  | 2 | 3 | 14 |
| mystery | Nigeria (Enugu) | 6  | 2 | 3 | 25 |
| mystery | Nigeria (Enugu) | 7  | 2 | 4 | 1  |
| mystery | Nigeria (Enugu) | 7  | 2 | 4 | 27 |
| mystery | Nigeria (Enugu) | 7  | 3 | 5 | 0  |
| mystery | Nigeria (Enugu) | 8  | 2 | 1 | 0  |
| mystery | Nigeria (Enugu) | 8  | 2 | 4 | 17 |
| mystery | Nigeria (Enugu) | 8  | 2 | 4 | 23 |
| mystery | Nigeria (Enugu) | 8  | 2 | 4 | 44 |
| mystery | Nigeria (Enugu) | 9  | 2 | 1 | 0  |
| mystery | Nigeria (Enugu) | 9  | 3 | 5 | 8  |
| mystery | Nigeria (Enugu) | 9  | 3 | 5 | 20 |
| mystery | Nigeria (Enugu) | 9  | 3 | 5 | 31 |
| mystery | Nigeria (Enugu) | 10 | 3 | 1 | 1  |
| mystery | Nigeria (Enugu) | 10 | 3 | 1 | 14 |
| mystery | Nigeria (Enugu) | 10 | 3 | 1 | 21 |
| mystery | Nigeria (Enugu) | 10 | 3 | 1 | 43 |
| mystery | Nigeria (Enugu) | 10 | 3 | 1 | 53 |
| mystery | Nigeria (Enugu) | 10 | 3 | 1 | 78 |
| mystery | Nigeria (Enugu) | 11 | 3 | 7 | 14 |
| mystery | Nigeria (Enugu) | 12 | 2 | 5 | 4  |
| mystery | Nigeria (Enugu) | 12 | 3 | 7 | 6  |
| mystery | Nigeria (Enugu) | 13 | 2 | 3 | 16 |
| mystery | Nigeria (Enugu) | 13 | 2 | 5 | 25 |
| mystery | Nigeria (Enugu) | 13 | 3 | 7 | 8  |
| mystery | Nigeria (Enugu) | 14 | 1 | 1 | 1  |
| mystery | Nigeria (Enugu) | 14 | 1 | 1 | 15 |
| mystery | Nigeria (Enugu) | 14 | 1 | 3 | 4  |
| mystery | Nigeria (Enugu) | 15 | 2 | 1 | 4  |
| mystery | Nigeria (Enugu) | 15 | 2 | 1 | 14 |
| mystery | Nigeria (Enugu) | 15 | 2 | 3 | 30 |
| mystery | Nigeria (Enugu) | 16 | 1 | 3 | 2  |
| mystery | Nigeria (Enugu) | 1  | 3 | 1 | 38 |
| mystery | Nigeria (Enugu) | 3  | 2 | 6 | 6  |
| mystery | Nigeria (Enugu) | 4  | 1 | 2 | 19 |
| mystery | Nigeria (Enugu) | 7  | 2 | 4 | 20 |
| mystery | Nigeria (Enugu) | 16 | 1 | 3 | 26 |
| mystery | Nigeria (Enugu) | 4  | 1 | 2 | 9  |
| mystery | Nigeria (Enugu) | 7  | 2 | 4 | 20 |
| mystery | Nigeria (Enugu) | 1  | 3 | 1 | 42 |
| mystery | Nigeria (Enugu) | 2  | 3 | 5 | 28 |
| mystery | Nigeria (Enugu) | 2  | 3 | 6 | 1  |
| mystery | Nigeria (Enugu) | 3  | 2 | 4 | 11 |

|         |                 |    |    |   |    |
|---------|-----------------|----|----|---|----|
| mystery | Nigeria (Enugu) | 3  | 22 | 6 | 6  |
| mystery | Nigeria (Enugu) | 4  | 1  | 2 | 9  |
| mystery | Nigeria (Enugu) | 4  | 1  | 2 | 12 |
| mystery | Nigeria (Enugu) | 4  | 1  | 2 | 53 |
| mystery | Nigeria (Enugu) | 5  | 1  | 2 | 8  |
| mystery | Nigeria (Enugu) | 6  | 2  | 3 | 14 |
| mystery | Nigeria (Enugu) | 6  | 2  | 3 | 37 |
| mystery | Nigeria (Enugu) | 10 | 3  | 1 | 5  |
| mystery | Nigeria (Enugu) | 11 | 2  | 5 | 12 |
| mystery | Nigeria (Enugu) | 12 | 3  | 7 | 6  |
| mystery | Nigeria (Enugu) | 13 | 2  | 3 | 16 |
| mystery | Nigeria (Enugu) | 14 | 1  | 1 | 1  |
| mystery | Nigeria (Enugu) | 14 | 1  | 1 | 15 |
| mystery | Nigeria (Enugu) | 14 | 1  | 3 | 1  |
| mystery | Nigeria (Enugu) | 15 | 2  | 3 | 10 |
| mystery | Nigeria (Enugu) | 15 | 2  | 3 | 11 |
| mystery | Nigeria (Enugu) | 15 | 2  | 3 | 30 |
| mystery | Nigeria (Enugu) | 15 | 2  | 3 | 38 |
| mystery | Nigeria (Enugu) | 16 | 1  | 3 | 2  |
| mystery | Nigeria (Enugu) | 16 | 1  | 3 | 14 |
| mystery | Nigeria (Enugu) | 16 | 1  | 3 | 30 |
| mystery | Nigeria (Enugu) | 1  | 3  | 1 | 12 |
| mystery | Nigeria (Enugu) | 1  | 3  | 1 | 13 |
| mystery | Nigeria (Enugu) | 1  | 3  | 1 | 42 |
| mystery | Nigeria (Enugu) | 3  | 2  | 1 | 2  |
| mystery | Nigeria (Enugu) | 3  | 2  | 4 | 11 |
| mystery | Nigeria (Enugu) | 3  | 2  | 4 | 21 |
| mystery | Nigeria (Enugu) | 3  | 2  | 4 | 39 |
| mystery | Nigeria (Enugu) | 4  | 1  | 2 | 6  |
| mystery | Nigeria (Enugu) | 6  | 2  | 1 | 13 |
| mystery | Nigeria (Enugu) | 6  | 2  | 3 | 6  |
| mystery | Nigeria (Enugu) | 7  | 2  | 4 | 25 |
| mystery | Nigeria (Enugu) | 9  | 2  | 2 | 1  |
| mystery | Nigeria (Enugu) | 10 | 3  | 1 | 5  |
| mystery | Nigeria (Enugu) | 10 | 3  | 1 | 71 |
| mystery | Nigeria (Enugu) | 11 | 2  | 5 | 12 |
| mystery | Nigeria (Enugu) | 13 | 2  | 3 | 21 |
| mystery | Nigeria (Enugu) | 13 | 3  | 7 | 8  |
| mystery | Nigeria (Enugu) | 13 | 3  | 7 | 28 |
| mystery | Nigeria (Enugu) | 15 | 2  | 3 | 10 |
| mystery | Nigeria (Enugu) | 15 | 2  | 3 | 38 |
| mystery | Nigeria (Enugu) | 16 | 1  | 3 | 7  |
| mystery | Nigeria (Enugu) | 16 | 1  | 3 | 38 |
| mystery | Nigeria (Enugu) | 10 | 3  | 1 | 21 |
| mystery | Nigeria (Enugu) | 4  | 1  | 2 | 8  |
| mystery | Nigeria (Enugu) | 11 | 2  | 5 | 5  |
| mystery | Nigeria (Enugu) | 14 | 1  | 3 | 21 |
| mystery | Nigeria (Enugu) | 9  | 2  | 1 | 0  |
| mystery | Nigeria (Enugu) | 4  | 2  | 3 | 3  |
| mystery | Nigeria (Enugu) | 5  | 1  | 2 | 2  |

|         |                 |    |   |   |    |
|---------|-----------------|----|---|---|----|
| mystery | Nigeria (Enugu) | 10 | 3 | 1 | 21 |
| mystery | Nigeria (Enugu) | 3  | 2 | 6 | 6  |
| mystery | Nigeria (Enugu) | 9  | 3 | 5 | 31 |
| mystery | Nigeria (Enugu) | 2  | 3 | 5 | 28 |
| mystery | Nigeria (Enugu) | 2  | 3 | 6 | 1  |
| mystery | Nigeria (Enugu) | 6  | 2 | 1 | 13 |
| mystery | Nigeria (Enugu) | 6  | 2 | 3 | 37 |
| mystery | Nigeria (Enugu) | 13 | 2 | 3 | 16 |
| mystery | Nigeria (Enugu) | 14 | 1 | 1 | 7  |
| mystery | Nigeria (Enugu) | 15 | 2 | 3 | 10 |
| mystery | Nigeria (Enugu) | 15 | 2 | 3 | 30 |
| mystery | Nigeria (Enugu) | 1  | 3 | 1 | 80 |
| mystery | Nigeria (Enugu) | 2  | 3 | 6 | 1  |
| mystery | Nigeria (Enugu) | 4  | 1 | 2 | 23 |
| mystery | Nigeria (Enugu) | 4  | 2 | 3 | 3  |
| mystery | Nigeria (Enugu) | 5  | 1 | 2 | 2  |
| mystery | Nigeria (Enugu) | 5  | 1 | 2 | 7  |
| mystery | Nigeria (Enugu) | 5  | 1 | 2 | 17 |
| mystery | Nigeria (Enugu) | 5  | 2 | 3 | 7  |
| mystery | Nigeria (Enugu) | 6  | 2 | 1 | 13 |
| mystery | Nigeria (Enugu) | 6  | 2 | 3 | 9  |
| mystery | Nigeria (Enugu) | 6  | 2 | 3 | 14 |
| mystery | Nigeria (Enugu) | 6  | 2 | 3 | 37 |
| mystery | Nigeria (Enugu) | 9  | 3 | 5 | 31 |
| mystery | Nigeria (Enugu) | 10 | 3 | 1 | 14 |
| mystery | Nigeria (Enugu) | 13 | 2 | 5 | 9  |
| mystery | Nigeria (Enugu) | 13 | 3 | 7 | 3  |
| mystery | Nigeria (Enugu) | 14 | 1 | 1 | 15 |
| mystery | Nigeria (Enugu) | 14 | 1 | 3 | 1  |
| mystery | Nigeria (Enugu) | 14 | 1 | 3 | 9  |
| mystery | Nigeria (Enugu) | 14 | 1 | 3 | 23 |
| mystery | Nigeria (Enugu) | 14 | 1 | 3 | 35 |
| mystery | Nigeria (Enugu) | 16 | 1 | 1 | 28 |
| mystery | Nigeria (Enugu) | 16 | 1 | 3 | 27 |
| mystery | Nigeria (Enugu) | 16 | 1 | 3 | 30 |
| mystery | Nigeria (Enugu) | 16 | 1 | 3 | 38 |
| mystery | Nigeria (Enugu) | 1  | 3 | 1 | 13 |
| mystery | Nigeria (Enugu) | 1  | 3 | 1 | 21 |
| mystery | Nigeria (Enugu) | 4  | 1 | 2 | 9  |
| mystery | Nigeria (Enugu) | 5  | 1 | 2 | 8  |
| mystery | Nigeria (Enugu) | 5  | 1 | 2 | 17 |
| mystery | Nigeria (Enugu) | 6  | 2 | 3 | 9  |
| mystery | Nigeria (Enugu) | 11 | 2 | 5 | 12 |
| mystery | Nigeria (Enugu) | 11 | 2 | 5 | 26 |
| mystery | Nigeria (Enugu) | 15 | 2 | 3 | 38 |
| mystery | Nigeria (Enugu) | 1  | 3 | 1 | 74 |
| mystery | Nigeria (Enugu) | 5  | 1 | 2 | 8  |
| mystery | Nigeria (Enugu) | 14 | 1 | 3 | 4  |
| mystery | Nigeria (Enugu) | 1  | 3 | 1 | 13 |
| mystery | Nigeria (Enugu) | 1  | 3 | 1 | 21 |

|         |                 |    |   |   |    |
|---------|-----------------|----|---|---|----|
| mystery | Nigeria (Enugu) | 1  | 3 | 1 | 42 |
| mystery | Nigeria (Enugu) | 2  | 3 | 6 | 1  |
| mystery | Nigeria (Enugu) | 3  | 2 | 4 | 14 |
| mystery | Nigeria (Enugu) | 5  | 1 | 2 | 2  |
| mystery | Nigeria (Enugu) | 5  | 1 | 2 | 57 |
| mystery | Nigeria (Enugu) | 6  | 2 | 1 | 11 |
| mystery | Nigeria (Enugu) | 7  | 2 | 4 | 1  |
| mystery | Nigeria (Enugu) | 7  | 2 | 4 | 4  |
| mystery | Nigeria (Enugu) | 8  | 2 | 4 | 5  |
| mystery | Nigeria (Enugu) | 10 | 3 | 1 | 2  |
| mystery | Nigeria (Enugu) | 10 | 3 | 1 | 33 |
| mystery | Nigeria (Enugu) | 11 | 2 | 5 | 6  |
| mystery | Nigeria (Enugu) | 11 | 2 | 5 | 12 |
| mystery | Nigeria (Enugu) | 11 | 2 | 5 | 22 |
| mystery | Nigeria (Enugu) | 11 | 2 | 5 | 26 |
| mystery | Nigeria (Enugu) | 12 | 3 | 7 | 6  |
| mystery | Nigeria (Enugu) | 13 | 3 | 7 | 28 |
| mystery | Nigeria (Enugu) | 13 | 3 | 7 | 33 |
| mystery | Nigeria (Enugu) | 14 | 1 | 1 | 1  |
| mystery | Nigeria (Enugu) | 14 | 1 | 1 | 20 |
| mystery | Nigeria (Enugu) | 14 | 1 | 3 | 1  |
| mystery | Nigeria (Enugu) | 14 | 1 | 3 | 29 |
| mystery | Nigeria (Enugu) | 14 | 1 | 3 | 35 |
| mystery | Nigeria (Enugu) | 15 | 2 | 1 | 7  |
| mystery | Nigeria (Enugu) | 15 | 2 | 1 | 14 |
| mystery | Nigeria (Enugu) | 15 | 2 | 3 | 10 |
| mystery | Nigeria (Enugu) | 15 | 2 | 3 | 11 |
| mystery | Nigeria (Enugu) | 15 | 2 | 3 | 15 |
| mystery | Nigeria (Enugu) | 15 | 2 | 3 | 28 |
| mystery | Nigeria (Enugu) | 15 | 2 | 3 | 38 |
| mystery | Nigeria (Enugu) | 16 | 1 | 3 | 7  |
| mystery | Nigeria (Enugu) | 16 | 1 | 3 | 38 |
| mystery | Nigeria (Enugu) | 5  | 1 | 2 | 7  |
| mystery | Nigeria (Enugu) | 11 | 2 | 5 | 12 |
| mystery | Nigeria (Enugu) | 1  | 3 | 1 | 68 |
| mystery | Nigeria (Enugu) | 3  | 2 | 6 | 6  |
| mystery | Nigeria (Enugu) | 4  | 1 | 2 | 9  |
| mystery | Nigeria (Enugu) | 4  | 1 | 2 | 19 |
| mystery | Nigeria (Enugu) | 5  | 1 | 2 | 57 |
| mystery | Nigeria (Enugu) | 9  | 3 | 5 | 31 |
| mystery | Nigeria (Enugu) | 7  | 2 | 4 | 1  |
| mystery | Nigeria (Enugu) | 14 | 1 | 3 | 29 |
| mystery | Nigeria (Enugu) | 4  | 1 | 2 | 1  |
| mystery | Nigeria (Enugu) | 7  | 2 | 4 | 1  |
| mystery | Nigeria (Enugu) | 5  | 1 | 2 | 2  |
| mystery | Nigeria (Enugu) | 5  | 1 | 2 | 8  |
| mystery | Nigeria (Enugu) | 5  | 1 | 2 | 17 |
| mystery | Nigeria (Enugu) | 6  | 2 | 1 | 11 |
| mystery | Nigeria (Enugu) | 6  | 2 | 3 | 6  |
| mystery | Nigeria (Enugu) | 7  | 2 | 4 | 20 |

|         |                 |    |   |   |    |
|---------|-----------------|----|---|---|----|
| mystery | Nigeria (Enugu) | 11 | 2 | 5 | 12 |
| mystery | Nigeria (Enugu) | 14 | 1 | 3 | 35 |
| mystery | Nigeria (Enugu) | 15 | 2 | 1 | 29 |
| mystery | Nigeria (Enugu) | 10 | 3 | 1 | 21 |
| mystery | Nigeria (Enugu) | 1  | 2 | 4 | 1  |
| mystery | Nigeria (Enugu) | 1  | 3 | 1 | 59 |
| mystery | Nigeria (Enugu) | 4  | 1 | 2 | 4  |
| mystery | Nigeria (Enugu) | 4  | 1 | 2 | 9  |
| mystery | Nigeria (Enugu) | 5  | 2 | 3 | 7  |
| mystery | Nigeria (Enugu) | 6  | 2 | 1 | 11 |
| mystery | Nigeria (Enugu) | 6  | 2 | 3 | 6  |
| mystery | Nigeria (Enugu) | 8  | 2 | 4 | 5  |
| mystery | Nigeria (Enugu) | 11 | 2 | 5 | 11 |
| mystery | Nigeria (Enugu) | 11 | 2 | 5 | 12 |
| mystery | Nigeria (Enugu) | 12 | 3 | 7 | 6  |
| mystery | Nigeria (Enugu) | 13 | 3 | 7 | 7  |
| mystery | Nigeria (Enugu) | 14 | 1 | 3 | 1  |
| mystery | Nigeria (Enugu) | 15 | 2 | 1 | 29 |
| mystery | Nigeria (Enugu) | 15 | 2 | 3 | 10 |
| mystery | Nigeria (Enugu) | 15 | 2 | 3 | 11 |
| mystery | Nigeria (Enugu) | 15 | 2 | 3 | 38 |
| mystery | Nigeria (Enugu) | 16 | 1 | 1 | 28 |
| mystery | Nigeria (Enugu) | 16 | 1 | 3 | 38 |
| mystery | Nigeria (Enugu) | 2  | 3 | 5 | 33 |
| mystery | Nigeria (Enugu) | 4  | 1 | 2 | 9  |
| mystery | Nigeria (Enugu) | 4  | 1 | 2 | 23 |
| mystery | Nigeria (Enugu) | 7  | 2 | 4 | 22 |
| mystery | Nigeria (Enugu) | 9  | 2 | 2 | 1  |
| mystery | Nigeria (Enugu) | 13 | 2 | 3 | 16 |
| mystery | Nigeria (Enugu) | 14 | 1 | 1 | 15 |
| mystery | Nigeria (Enugu) | 14 | 1 | 3 | 4  |
| mystery | Nigeria (Enugu) | 14 | 1 | 3 | 5  |
| mystery | Nigeria (Enugu) | 15 | 2 | 3 | 38 |
| mystery | Nigeria (Enugu) | 4  | 1 | 2 | 1  |
| mystery | Nigeria (Enugu) | 5  | 2 | 3 | 7  |
| mystery | Nigeria (Enugu) | 13 | 3 | 7 | 1  |
| mystery | Nigeria (Enugu) | 2  | 3 | 5 | 27 |
| mystery | Nigeria (Enugu) | 4  | 1 | 2 | 9  |
| mystery | Nigeria (Enugu) | 5  | 1 | 2 | 2  |
| mystery | Nigeria (Enugu) | 1  | 3 | 1 | 10 |
| mystery | Nigeria (Enugu) | 1  | 3 | 1 | 12 |
| mystery | Nigeria (Enugu) | 1  | 3 | 1 | 13 |
| mystery | Nigeria (Enugu) | 1  | 3 | 1 | 36 |
| mystery | Nigeria (Enugu) | 1  | 3 | 1 | 59 |
| mystery | Nigeria (Enugu) | 1  | 3 | 1 | 68 |
| mystery | Nigeria (Enugu) | 1  | 3 | 1 | 69 |
| mystery | Nigeria (Enugu) | 1  | 3 | 1 | 70 |
| mystery | Nigeria (Enugu) | 1  | 3 | 1 | 76 |
| mystery | Nigeria (Enugu) | 1  | 3 | 1 | 80 |
| mystery | Nigeria (Enugu) | 1  | 3 | 1 | 81 |

|         |                 |   |   |   |    |
|---------|-----------------|---|---|---|----|
| mystery | Nigeria (Enugu) | 1 | 3 | 1 | 82 |
| mystery | Nigeria (Enugu) | 1 | 3 | 1 | 84 |
| mystery | Nigeria (Enugu) | 2 | 3 | 2 | 5  |
| mystery | Nigeria (Enugu) | 2 | 3 | 2 | 7  |
| mystery | Nigeria (Enugu) | 2 | 3 | 2 | 8  |
| mystery | Nigeria (Enugu) | 2 | 3 | 4 | 3  |
| mystery | Nigeria (Enugu) | 2 | 3 | 5 | 4  |
| mystery | Nigeria (Enugu) | 2 | 3 | 5 | 25 |
| mystery | Nigeria (Enugu) | 2 | 3 | 6 | 1  |
| mystery | Nigeria (Enugu) | 3 | 2 | 4 | 2  |
| mystery | Nigeria (Enugu) | 3 | 2 | 4 | 7  |
| mystery | Nigeria (Enugu) | 3 | 2 | 4 | 11 |
| mystery | Nigeria (Enugu) | 3 | 2 | 4 | 15 |
| mystery | Nigeria (Enugu) | 3 | 2 | 4 | 21 |
| mystery | Nigeria (Enugu) | 3 | 2 | 4 | 26 |
| mystery | Nigeria (Enugu) | 3 | 2 | 4 | 43 |
| mystery | Nigeria (Enugu) | 3 | 2 | 6 | 6  |
| mystery | Nigeria (Enugu) | 4 | 1 | 2 | 4  |
| mystery | Nigeria (Enugu) | 4 | 1 | 2 | 5  |
| mystery | Nigeria (Enugu) | 4 | 1 | 2 | 8  |
| mystery | Nigeria (Enugu) | 4 | 1 | 2 | 9  |
| mystery | Nigeria (Enugu) | 4 | 1 | 2 | 15 |
| mystery | Nigeria (Enugu) | 4 | 1 | 2 | 19 |
| mystery | Nigeria (Enugu) | 4 | 1 | 2 | 23 |
| mystery | Nigeria (Enugu) | 4 | 1 | 2 | 35 |
| mystery | Nigeria (Enugu) | 4 | 1 | 2 | 36 |
| mystery | Nigeria (Enugu) | 4 | 1 | 2 | 53 |
| mystery | Nigeria (Enugu) | 5 | 1 | 2 | 2  |
| mystery | Nigeria (Enugu) | 5 | 1 | 2 | 7  |
| mystery | Nigeria (Enugu) | 5 | 1 | 2 | 8  |
| mystery | Nigeria (Enugu) | 5 | 1 | 2 | 10 |
| mystery | Nigeria (Enugu) | 5 | 1 | 2 | 21 |
| mystery | Nigeria (Enugu) | 5 | 1 | 2 | 22 |
| mystery | Nigeria (Enugu) | 5 | 1 | 2 | 30 |
| mystery | Nigeria (Enugu) | 5 | 1 | 2 | 31 |
| mystery | Nigeria (Enugu) | 5 | 1 | 2 | 33 |
| mystery | Nigeria (Enugu) | 5 | 1 | 2 | 46 |
| mystery | Nigeria (Enugu) | 5 | 1 | 2 | 49 |
| mystery | Nigeria (Enugu) | 5 | 1 | 2 | 56 |
| mystery | Nigeria (Enugu) | 5 | 1 | 2 | 59 |
| mystery | Nigeria (Enugu) | 5 | 1 | 2 | 59 |
| mystery | Nigeria (Enugu) | 5 | 2 | 3 | 7  |
| mystery | Nigeria (Enugu) | 5 | 2 | 3 | 12 |
| mystery | Nigeria (Enugu) | 6 | 2 | 1 | 1  |
| mystery | Nigeria (Enugu) | 6 | 2 | 1 | 13 |
| mystery | Nigeria (Enugu) | 6 | 2 | 1 | 15 |
| mystery | Nigeria (Enugu) | 6 | 2 | 1 | 28 |
| mystery | Nigeria (Enugu) | 6 | 2 | 3 | 1  |
| mystery | Nigeria (Enugu) | 6 | 2 | 3 | 14 |
| mystery | Nigeria (Enugu) | 6 | 2 | 3 | 25 |

|         |                 |    |   |   |    |
|---------|-----------------|----|---|---|----|
| mystery | Nigeria (Enugu) | 6  | 2 | 3 | 37 |
| mystery | Nigeria (Enugu) | 7  | 2 | 4 | 1  |
| mystery | Nigeria (Enugu) | 7  | 2 | 4 | 22 |
| mystery | Nigeria (Enugu) | 8  | 2 | 1 | 8  |
| mystery | Nigeria (Enugu) | 8  | 2 | 4 | 5  |
| mystery | Nigeria (Enugu) | 8  | 2 | 4 | 5  |
| mystery | Nigeria (Enugu) | 8  | 2 | 4 | 10 |
| mystery | Nigeria (Enugu) | 8  | 2 | 4 | 16 |
| mystery | Nigeria (Enugu) | 8  | 2 | 4 | 17 |
| mystery | Nigeria (Enugu) | 8  | 2 | 4 | 23 |
| mystery | Nigeria (Enugu) | 8  | 2 | 4 | 33 |
| mystery | Nigeria (Enugu) | 8  | 2 | 4 | 44 |
| mystery | Nigeria (Enugu) | 9  | 2 | 2 | 1  |
| mystery | Nigeria (Enugu) | 9  | 2 | 2 | 7  |
| mystery | Nigeria (Enugu) | 9  | 3 | 5 | 11 |
| mystery | Nigeria (Enugu) | 9  | 3 | 5 | 16 |
| mystery | Nigeria (Enugu) | 9  | 3 | 5 | 19 |
| mystery | Nigeria (Enugu) | 10 | 3 | 1 | 1  |
| mystery | Nigeria (Enugu) | 10 | 3 | 1 | 5  |
| mystery | Nigeria (Enugu) | 10 | 3 | 1 | 14 |
| mystery | Nigeria (Enugu) | 10 | 3 | 1 | 15 |
| mystery | Nigeria (Enugu) | 10 | 3 | 1 | 20 |
| mystery | Nigeria (Enugu) | 10 | 3 | 1 | 25 |
| mystery | Nigeria (Enugu) | 10 | 3 | 1 | 33 |
| mystery | Nigeria (Enugu) | 10 | 3 | 1 | 37 |
| mystery | Nigeria (Enugu) | 10 | 3 | 1 | 53 |
| mystery | Nigeria (Enugu) | 10 | 3 | 1 | 65 |
| mystery | Nigeria (Enugu) | 10 | 3 | 1 | 79 |
| mystery | Nigeria (Enugu) | 11 | 2 | 5 | 1  |
| mystery | Nigeria (Enugu) | 11 | 2 | 5 | 5  |
| mystery | Nigeria (Enugu) | 11 | 2 | 5 | 22 |
| mystery | Nigeria (Enugu) | 11 | 2 | 5 | 26 |
| mystery | Nigeria (Enugu) | 11 | 3 | 7 | 14 |
| mystery | Nigeria (Enugu) | 11 | 3 | 7 | 15 |
| mystery | Nigeria (Enugu) | 11 | 3 | 7 | 24 |
| mystery | Nigeria (Enugu) | 11 | 3 | 7 | 27 |
| mystery | Nigeria (Enugu) | 12 | 2 | 5 | 2  |
| mystery | Nigeria (Enugu) | 12 | 2 | 5 | 10 |
| mystery | Nigeria (Enugu) | 12 | 2 | 5 | 16 |
| mystery | Nigeria (Enugu) | 12 | 2 | 5 | 24 |
| mystery | Nigeria (Enugu) | 12 | 3 | 7 | 6  |
| mystery | Nigeria (Enugu) | 12 | 3 | 7 | 23 |
| mystery | Nigeria (Enugu) | 13 | 2 | 3 | 16 |
| mystery | Nigeria (Enugu) | 13 | 2 | 3 | 21 |
| mystery | Nigeria (Enugu) | 13 | 2 | 5 | 25 |
| mystery | Nigeria (Enugu) | 13 | 3 | 7 | 1  |
| mystery | Nigeria (Enugu) | 13 | 3 | 7 | 4  |
| mystery | Nigeria (Enugu) | 13 | 3 | 7 | 7  |
| mystery | Nigeria (Enugu) | 13 | 3 | 7 | 8  |
| mystery | Nigeria (Enugu) | 13 | 3 | 7 | 28 |

|         |                 |    |   |   |    |
|---------|-----------------|----|---|---|----|
| mystery | Nigeria (Enugu) | 13 | 3 | 7 | 31 |
| mystery | Nigeria (Enugu) | 13 | 3 | 7 | 32 |
| mystery | Nigeria (Enugu) | 13 | 3 | 7 | 33 |
| mystery | Nigeria (Enugu) | 14 | 1 | 1 | 1  |
| mystery | Nigeria (Enugu) | 14 | 1 | 1 | 5  |
| mystery | Nigeria (Enugu) | 14 | 1 | 1 | 6  |
| mystery | Nigeria (Enugu) | 14 | 1 | 1 | 7  |
| mystery | Nigeria (Enugu) | 14 | 1 | 1 | 15 |
| mystery | Nigeria (Enugu) | 14 | 1 | 1 | 16 |
| mystery | Nigeria (Enugu) | 14 | 1 | 1 | 18 |
| mystery | Nigeria (Enugu) | 14 | 1 | 1 | 20 |
| mystery | Nigeria (Enugu) | 14 | 1 | 3 | 5  |
| mystery | Nigeria (Enugu) | 14 | 1 | 3 | 9  |
| mystery | Nigeria (Enugu) | 14 | 1 | 3 | 21 |
| mystery | Nigeria (Enugu) | 14 | 1 | 3 | 23 |
| mystery | Nigeria (Enugu) | 14 | 1 | 3 | 25 |
| mystery | Nigeria (Enugu) | 14 | 1 | 3 | 32 |
| mystery | Nigeria (Enugu) | 14 | 1 | 3 | 35 |
| mystery | Nigeria (Enugu) | 15 | 2 | 1 | 4  |
| mystery | Nigeria (Enugu) | 15 | 2 | 1 | 5  |
| mystery | Nigeria (Enugu) | 15 | 2 | 1 | 7  |
| mystery | Nigeria (Enugu) | 15 | 2 | 1 | 14 |
| mystery | Nigeria (Enugu) | 15 | 2 | 3 | 10 |
| mystery | Nigeria (Enugu) | 15 | 2 | 3 | 15 |
| mystery | Nigeria (Enugu) | 15 | 2 | 3 | 20 |
| mystery | Nigeria (Enugu) | 15 | 2 | 3 | 24 |
| mystery | Nigeria (Enugu) | 15 | 2 | 3 | 26 |
| mystery | Nigeria (Enugu) | 15 | 2 | 3 | 30 |
| mystery | Nigeria (Enugu) | 15 | 2 | 3 | 34 |
| mystery | Nigeria (Enugu) | 15 | 2 | 3 | 38 |
| mystery | Nigeria (Enugu) | 16 | 1 | 1 | 17 |
| mystery | Nigeria (Enugu) | 16 | 1 | 3 | 7  |
| mystery | Nigeria (Enugu) | 16 | 1 | 3 | 11 |
| mystery | Nigeria (Enugu) | 16 | 1 | 3 | 14 |
| mystery | Nigeria (Enugu) | 16 | 1 | 3 | 26 |
| mystery | Nigeria (Enugu) | 16 | 1 | 3 | 30 |
| mystery | Nigeria (Enugu) | 16 | 1 | 3 | 31 |
| mystery | Nigeria (Enugu) | 16 | 1 | 3 | 38 |
| mystery | Nigeria (Enugu) | 4  | 1 | 2 | 53 |
| mystery | Nigeria (Enugu) | 5  | 1 | 2 | 2  |
| mystery | Nigeria (Enugu) | 5  | 1 | 2 | 8  |
| mystery | Nigeria (Enugu) | 10 | 3 | 1 | 14 |
| mystery | Nigeria (Enugu) | 11 | 2 | 5 | 22 |
| mystery | Nigeria (Enugu) | 15 | 2 | 1 | 4  |
| mystery | Nigeria (Enugu) | 4  | 1 | 2 | 4  |
| mystery | Nigeria (Enugu) | 4  | 1 | 2 | 9  |
| mystery | Nigeria (Enugu) | 4  | 1 | 2 | 53 |
| mystery | Nigeria (Enugu) | 5  | 1 | 2 | 8  |
| mystery | Nigeria (Enugu) | 5  | 2 | 3 | 12 |
| mystery | Nigeria (Enugu) | 15 | 2 | 1 | 17 |



|         |                 |    |   |   |    |
|---------|-----------------|----|---|---|----|
| mystery | Nigeria (Enugu) | 1  | 3 | 1 | 59 |
| mystery | Nigeria (Enugu) | 13 | 3 | 7 | 7  |
| mystery | Nigeria (Enugu) | 3  | 2 | 4 | 21 |
| mystery | Nigeria (Enugu) | 6  | 2 | 1 | 11 |
| mystery | Nigeria (Enugu) | 6  | 2 | 1 | 28 |
| mystery | Nigeria (Enugu) | 4  | 1 | 2 | 53 |
| mystery | Nigeria (Enugu) | 5  | 1 | 2 | 8  |
| mystery | Nigeria (Enugu) | 13 | 3 | 7 | 3  |
| mystery | Nigeria (Enugu) | 14 | 1 | 1 | 18 |
| mystery | Nigeria (Enugu) | 15 | 2 | 3 | 38 |
| mystery | Nigeria (Enugu) | 8  | 2 | 1 | 8  |
| mystery | Nigeria (Enugu) | 5  | 1 | 2 | 2  |
| mystery | Nigeria (Enugu) | 14 | 1 | 3 | 1  |
| mystery | Nigeria (Enugu) | 11 | 2 | 5 | 5  |
| mystery | Nigeria (Enugu) | 15 | 2 | 1 | 29 |
| mystery | Nigeria (Enugu) | 15 | 2 | 3 | 26 |
| mystery | Nigeria (Enugu) | 4  | 1 | 2 | 9  |
| mystery | Nigeria (Enugu) | 5  | 2 | 3 | 12 |
| mystery | Nigeria (Enugu) | 6  | 2 | 3 | 1  |
| mystery | Nigeria (Enugu) | 6  | 2 | 3 | 6  |
| mystery | Nigeria (Enugu) | 1  | 3 | 1 | 10 |
| mystery | Nigeria (Enugu) | 1  | 3 | 1 | 13 |
| mystery | Nigeria (Enugu) | 1  | 3 | 1 | 38 |
| mystery | Nigeria (Enugu) | 1  | 3 | 1 | 42 |
| mystery | Nigeria (Enugu) | 1  | 3 | 1 | 59 |
| mystery | Nigeria (Enugu) | 1  | 3 | 1 | 75 |
| mystery | Nigeria (Enugu) | 1  | 3 | 1 | 83 |
| mystery | Nigeria (Enugu) | 1  | 3 | 1 | 84 |
| mystery | Nigeria (Enugu) | 2  | 3 | 2 | 5  |
| mystery | Nigeria (Enugu) | 2  | 3 | 5 | 30 |
| mystery | Nigeria (Enugu) | 3  | 2 | 4 | 2  |
| mystery | Nigeria (Enugu) | 3  | 2 | 4 | 7  |
| mystery | Nigeria (Enugu) | 3  | 2 | 4 | 8  |
| mystery | Nigeria (Enugu) | 3  | 2 | 4 | 13 |
| mystery | Nigeria (Enugu) | 3  | 2 | 4 | 15 |
| mystery | Nigeria (Enugu) | 3  | 2 | 4 | 21 |
| mystery | Nigeria (Enugu) | 3  | 2 | 6 | 6  |
| mystery | Nigeria (Enugu) | 4  | 1 | 2 | 15 |
| mystery | Nigeria (Enugu) | 4  | 1 | 2 | 19 |
| mystery | Nigeria (Enugu) | 4  | 1 | 2 | 36 |
| mystery | Nigeria (Enugu) | 5  | 1 | 2 | 17 |
| mystery | Nigeria (Enugu) | 5  | 1 | 2 | 57 |
| mystery | Nigeria (Enugu) | 5  | 1 | 2 | 59 |
| mystery | Nigeria (Enugu) | 5  | 2 | 3 | 7  |
| mystery | Nigeria (Enugu) | 5  | 2 | 3 | 12 |
| mystery | Nigeria (Enugu) | 6  | 2 | 1 | 15 |
| mystery | Nigeria (Enugu) | 6  | 2 | 1 | 28 |
| mystery | Nigeria (Enugu) | 6  | 2 | 3 | 1  |
| mystery | Nigeria (Enugu) | 6  | 2 | 3 | 25 |
| mystery | Nigeria (Enugu) | 6  | 2 | 3 | 31 |

|         |                 |    |   |   |    |
|---------|-----------------|----|---|---|----|
| mystery | Nigeria (Enugu) | 6  | 2 | 3 | 37 |
| mystery | Nigeria (Enugu) | 7  | 2 | 4 | 4  |
| mystery | Nigeria (Enugu) | 7  | 2 | 4 | 22 |
| mystery | Nigeria (Enugu) | 7  | 2 | 4 | 25 |
| mystery | Nigeria (Enugu) | 8  | 2 | 4 | 16 |
| mystery | Nigeria (Enugu) | 9  | 2 | 2 | 1  |
| mystery | Nigeria (Enugu) | 9  | 3 | 5 | 19 |
| mystery | Nigeria (Enugu) | 9  | 3 | 5 | 20 |
| mystery | Nigeria (Enugu) | 10 | 3 | 1 | 5  |
| mystery | Nigeria (Enugu) | 10 | 3 | 1 | 8  |
| mystery | Nigeria (Enugu) | 10 | 3 | 1 | 14 |
| mystery | Nigeria (Enugu) | 10 | 3 | 1 | 20 |
| mystery | Nigeria (Enugu) | 10 | 3 | 1 | 33 |
| mystery | Nigeria (Enugu) | 10 | 3 | 1 | 66 |
| mystery | Nigeria (Enugu) | 10 | 3 | 1 | 71 |
| mystery | Nigeria (Enugu) | 10 | 3 | 1 | 78 |
| mystery | Nigeria (Enugu) | 10 | 3 | 1 | 79 |
| mystery | Nigeria (Enugu) | 11 | 2 | 5 | 1  |
| mystery | Nigeria (Enugu) | 11 | 2 | 5 | 5  |
| mystery | Nigeria (Enugu) | 11 | 2 | 5 | 11 |
| mystery | Nigeria (Enugu) | 11 | 2 | 5 | 22 |
| mystery | Nigeria (Enugu) | 11 | 2 | 5 | 26 |
| mystery | Nigeria (Enugu) | 12 | 3 | 7 | 18 |
| mystery | Nigeria (Enugu) | 13 | 2 | 3 | 16 |
| mystery | Nigeria (Enugu) | 13 | 2 | 5 | 9  |
| mystery | Nigeria (Enugu) | 13 | 3 | 7 | 1  |
| mystery | Nigeria (Enugu) | 13 | 3 | 7 | 33 |
| mystery | Nigeria (Enugu) | 14 | 1 | 1 | 6  |
| mystery | Nigeria (Enugu) | 14 | 1 | 1 | 20 |
| mystery | Nigeria (Enugu) | 14 | 1 | 3 | 1  |
| mystery | Nigeria (Enugu) | 14 | 1 | 3 | 4  |
| mystery | Nigeria (Enugu) | 14 | 1 | 3 | 5  |
| mystery | Nigeria (Enugu) | 14 | 1 | 3 | 29 |
| mystery | Nigeria (Enugu) | 14 | 1 | 3 | 35 |
| mystery | Nigeria (Enugu) | 15 | 2 | 1 | 5  |
| mystery | Nigeria (Enugu) | 15 | 2 | 1 | 7  |
| mystery | Nigeria (Enugu) | 15 | 2 | 1 | 19 |
| mystery | Nigeria (Enugu) | 15 | 2 | 1 | 29 |
| mystery | Nigeria (Enugu) | 15 | 2 | 3 | 10 |
| mystery | Nigeria (Enugu) | 15 | 2 | 3 | 11 |
| mystery | Nigeria (Enugu) | 15 | 2 | 3 | 20 |
| mystery | Nigeria (Enugu) | 15 | 2 | 3 | 30 |
| mystery | Nigeria (Enugu) | 15 | 2 | 3 | 38 |
| mystery | Nigeria (Enugu) | 16 | 1 | 1 | 7  |
| mystery | Nigeria (Enugu) | 16 | 1 | 3 | 2  |
| mystery | Nigeria (Enugu) | 16 | 1 | 3 | 6  |
| mystery | Nigeria (Enugu) | 16 | 1 | 3 | 27 |
| mystery | Nigeria (Enugu) | 16 | 1 | 3 | 30 |
| mystery | Nigeria (Enugu) | 16 | 1 | 3 | 31 |
| mystery | Nigeria (Enugu) | 16 | 1 | 3 | 38 |

|         |                 |    |   |   |    |
|---------|-----------------|----|---|---|----|
| mystery | Nigeria (Enugu) | 1  | 3 | 1 | 10 |
| mystery | Nigeria (Enugu) | 5  | 1 | 2 | 7  |
| mystery | Nigeria (Enugu) | 6  | 2 | 1 | 11 |
| mystery | Nigeria (Enugu) | 11 | 2 | 5 | 1  |
| mystery | Nigeria (Enugu) | 13 | 3 | 7 | 1  |
| mystery | Nigeria (Enugu) | 13 | 3 | 7 | 33 |
| mystery | Nigeria (Enugu) | 1  | 3 | 1 | 4  |
| mystery | Nigeria (Enugu) | 9  | 2 | 2 | 6  |
| mystery | Nigeria (Enugu) | 10 | 3 | 1 | 21 |
| mystery | Nigeria (Enugu) | 11 | 3 | 7 | 24 |
| mystery | Nigeria (Enugu) | 12 | 2 | 5 | 16 |
| mystery | Nigeria (Enugu) | 1  | 3 | 1 | 39 |
| mystery | Nigeria (Enugu) | 1  | 3 | 1 | 74 |
| mystery | Nigeria (Enugu) | 3  | 2 | 6 | 6  |
| mystery | Nigeria (Enugu) | 6  | 2 | 1 | 28 |
| mystery | Nigeria (Enugu) | 11 | 2 | 5 | 22 |
| mystery | Nigeria (Enugu) | 12 | 2 | 5 | 3  |
| mystery | Nigeria (Enugu) | 13 | 3 | 7 | 9  |
| mystery | Nigeria (Enugu) | 15 | 2 | 1 | 4  |
| mystery | Nigeria (Enugu) | 15 | 2 | 1 | 5  |
| mystery | Nigeria (Enugu) | 3  | 2 | 4 | 21 |
| mystery | Nigeria (Enugu) | 4  | 1 | 2 | 15 |
| mystery | Nigeria (Enugu) | 4  | 1 | 2 | 53 |
| mystery | Nigeria (Enugu) | 5  | 1 | 2 | 22 |
| mystery | Nigeria (Enugu) | 6  | 2 | 1 | 11 |
| mystery | Nigeria (Enugu) | 14 | 1 | 3 | 9  |
| mystery | Nigeria (Enugu) | 15 | 2 | 1 | 29 |
| mystery | Nigeria (Enugu) | 15 | 2 | 3 | 28 |
| mystery | Nigeria (Enugu) | 16 | 1 | 3 | 7  |
| mystery | Nigeria (Enugu) | 16 | 1 | 3 | 11 |
| mystery | Nigeria (Enugu) | 16 | 1 | 3 | 38 |
| mystery | Nigeria (Enugu) | 5  | 1 | 2 | 59 |
| mystery | Nigeria (Enugu) | 6  | 2 | 1 | 11 |
| mystery | Nigeria (Enugu) | 6  | 2 | 3 | 37 |
| mystery | Nigeria (Enugu) | 6  | 2 | 1 | 11 |
| mystery | Nigeria (Enugu) | 16 | 1 | 3 | 4  |
| mystery | Nigeria (Enugu) | 4  | 1 | 2 | 8  |
| mystery | Nigeria (Enugu) | 5  | 1 | 2 | 17 |
| mystery | Nigeria (Enugu) | 9  | 2 | 2 | 2  |
| mystery | Nigeria (Enugu) | 9  | 3 | 5 | 16 |
| mystery | Nigeria (Enugu) | 16 | 1 | 1 | 28 |
| mystery | Nigeria (Enugu) | 1  | 3 | 1 | 60 |
| mystery | Nigeria (Enugu) | 1  | 3 | 1 | 60 |
| mystery | Nigeria (Enugu) | 5  | 1 | 2 | 7  |
| mystery | Nigeria (Enugu) | 5  | 1 | 2 | 55 |
| mystery | Nigeria (Enugu) | 5  | 1 | 2 | 59 |
| mystery | Nigeria (Enugu) | 14 | 1 | 1 | 15 |
| mystery | Nigeria (Enugu) | 14 | 1 | 3 | 9  |
| mystery | Nigeria (Enugu) | 15 | 2 | 3 | 38 |
| mystery | Nigeria (Enugu) | 16 | 1 | 3 | 7  |

|         |                 |    |   |   |    |
|---------|-----------------|----|---|---|----|
| mystery | Nigeria (Enugu) | 13 | 2 | 5 | 25 |
| mystery | Nigeria (Enugu) | 3  | 2 | 4 | 21 |
| mystery | Nigeria (Enugu) | 4  | 1 | 2 | 9  |
| mystery | Nigeria (Enugu) | 4  | 1 | 2 | 19 |
| mystery | Nigeria (Enugu) | 5  | 1 | 2 | 55 |
| mystery | Nigeria (Enugu) | 5  | 2 | 1 | 0  |
| mystery | Nigeria (Enugu) | 6  | 2 | 3 | 37 |
| mystery | Nigeria (Enugu) | 9  | 2 | 2 | 1  |
| mystery | Nigeria (Enugu) | 9  | 3 | 6 | 8  |
| mystery | Nigeria (Enugu) | 15 | 2 | 1 | 14 |
| mystery | Nigeria (Enugu) | 16 | 1 | 3 | 11 |
| mystery | Nigeria (Enugu) | 5  | 1 | 2 | 59 |
| mystery | Nigeria (Enugu) | 4  | 1 | 2 | 53 |
| mystery | Nigeria (Enugu) | 5  | 1 | 2 | 7  |
| mystery | Nigeria (Enugu) | 6  | 2 | 3 | 14 |
| mystery | Nigeria (Enugu) | 15 | 2 | 1 | 14 |
| mystery | Nigeria (Enugu) | 2  | 3 | 5 | 4  |
| mystery | Nigeria (Enugu) | 6  | 2 | 1 | 11 |
| mystery | Nigeria (Enugu) | 9  | 3 | 5 | 8  |
| mystery | Nigeria (Enugu) | 13 | 3 | 7 | 8  |
| mystery | Nigeria (Enugu) | 16 | 1 | 3 | 11 |
| mystery | Nigeria (Enugu) | 5  | 1 | 2 | 8  |
| mystery | Nigeria (Enugu) | 15 | 2 | 3 | 38 |
| mystery | Nigeria (Enugu) | 6  | 2 | 3 | 14 |
| mystery | Nigeria (Enugu) | 1  | 3 | 1 | 60 |
| mystery | Nigeria (Enugu) | 2  | 3 | 2 | 6  |
| mystery | Nigeria (Enugu) | 2  | 3 | 2 | 7  |
| mystery | Nigeria (Enugu) | 2  | 3 | 6 | 1  |
| mystery | Nigeria (Enugu) | 3  | 2 | 4 | 13 |
| mystery | Nigeria (Enugu) | 3  | 2 | 4 | 21 |
| mystery | Nigeria (Enugu) | 4  | 1 | 2 | 9  |
| mystery | Nigeria (Enugu) | 4  | 1 | 2 | 19 |
| mystery | Nigeria (Enugu) | 6  | 2 | 3 | 1  |
| mystery | Nigeria (Enugu) | 6  | 2 | 1 | 11 |
| mystery | Nigeria (Enugu) | 6  | 2 | 1 | 15 |
| mystery | Nigeria (Enugu) | 6  | 2 | 1 | 28 |
| mystery | Nigeria (Enugu) | 6  | 2 | 3 | 31 |
| mystery | Nigeria (Enugu) | 6  | 2 | 3 | 36 |
| mystery | Nigeria (Enugu) | 8  | 2 | 4 | 16 |
| mystery | Nigeria (Enugu) | 8  | 2 | 4 | 44 |
| mystery | Nigeria (Enugu) | 9  | 2 | 2 | 1  |
| mystery | Nigeria (Enugu) | 9  | 2 | 2 | 10 |
| mystery | Nigeria (Enugu) | 9  | 2 | 2 | 11 |
| mystery | Nigeria (Enugu) | 9  | 3 | 5 | 16 |
| mystery | Nigeria (Enugu) | 9  | 3 | 5 | 19 |
| mystery | Nigeria (Enugu) | 9  | 3 | 6 | 8  |
| mystery | Nigeria (Enugu) | 14 | 1 | 1 | 6  |
| mystery | Nigeria (Enugu) | 14 | 1 | 1 | 15 |
| mystery | Nigeria (Enugu) | 14 | 1 | 3 | 10 |
| mystery | Nigeria (Enugu) | 14 | 1 | 3 | 5  |

|         |                 |    |   |   |    |
|---------|-----------------|----|---|---|----|
| mystery | Nigeria (Enugu) | 14 | 1 | 3 | 9  |
| mystery | Nigeria (Enugu) | 15 | 2 | 1 | 29 |
| mystery | Nigeria (Enugu) | 15 | 2 | 3 | 10 |
| mystery | Nigeria (Enugu) | 15 | 2 | 3 | 20 |
| mystery | Nigeria (Enugu) | 16 | 1 | 1 | 28 |
| mystery | Nigeria (Enugu) | 16 | 1 | 3 | 11 |
| mystery | Nigeria (Enugu) | 16 | 1 | 3 | 2  |
| mystery | Nigeria (Enugu) | 16 | 1 | 3 | 31 |
| mystery | Nigeria (Enugu) | 16 | 1 | 3 | 38 |
| mystery | Nigeria (Enugu) | 4  | 1 | 2 | 4  |
| mystery | Nigeria (Enugu) | 4  | 1 | 2 | 19 |
| mystery | Nigeria (Enugu) | 5  | 1 | 2 | 22 |
| mystery | Nigeria (Enugu) | 15 | 2 | 3 | 30 |
| mystery | Nigeria (Enugu) | 4  | 1 | 2 | 9  |
| mystery | Nigeria (Enugu) | 7  | 2 | 4 | 4  |
| mystery | Nigeria (Enugu) | 9  | 2 | 1 | 0  |
| mystery | Nigeria (Enugu) | 11 | 2 | 5 | 1  |
| mystery | Nigeria (Enugu) | 12 | 2 | 5 | 4  |
| mystery | Nigeria (Enugu) | 6  | 2 | 3 | 6  |
| mystery | Nigeria (Enugu) | 4  | 1 | 2 | 53 |
| mystery | Nigeria (Enugu) | 3  | 2 | 4 | 21 |
| mystery | Nigeria (Enugu) | 5  | 1 | 2 | 11 |
| mystery | Nigeria (Enugu) | 13 | 3 | 7 | 32 |
| mystery | Nigeria (Enugu) | 15 | 2 | 1 | 5  |
| mystery | Nigeria (Enugu) | 1  | 3 | 1 | 60 |
| mystery | Nigeria (Enugu) | 2  | 3 | 5 | 27 |
| mystery | Nigeria (Enugu) | 6  | 2 | 1 | 15 |
| mystery | Nigeria (Enugu) | 9  | 2 | 2 | 1  |
| mystery | Nigeria (Enugu) | 9  | 2 | 2 | 7  |
| mystery | Nigeria (Enugu) | 9  | 2 | 2 | 10 |
| mystery | Nigeria (Enugu) | 9  | 3 | 5 | 20 |
| mystery | Nigeria (Enugu) | 9  | 3 | 6 | 8  |
| mystery | Nigeria (Enugu) | 14 | 1 | 1 | 15 |
| mystery | Nigeria (Enugu) | 14 | 1 | 3 | 1  |
| mystery | Nigeria (Enugu) | 14 | 1 | 3 | 23 |
| mystery | Nigeria (Enugu) | 14 | 1 | 3 | 35 |
| mystery | Nigeria (Enugu) | 15 | 2 | 3 | 38 |
| mystery | Nigeria (Enugu) | 16 | 1 | 1 | 28 |
| mystery | Nigeria (Enugu) | 16 | 1 | 3 | 11 |
| mystery | Nigeria (Enugu) | 16 | 1 | 3 | 31 |
| mystery | Nigeria (Enugu) | 9  | 2 | 2 | 10 |
| mystery | Nigeria (Enugu) | 15 | 2 | 3 | 28 |
| mystery | Nigeria (Enugu) | 15 | 2 | 1 | 29 |
| mystery | Nigeria (Enugu) | 1  | 3 | 1 | 4  |
| mystery | Nigeria (Enugu) | 1  | 3 | 1 | 13 |
| mystery | Nigeria (Enugu) | 1  | 3 | 1 | 60 |
| mystery | Nigeria (Enugu) | 4  | 1 | 2 | 12 |
| mystery | Nigeria (Enugu) | 4  | 1 | 2 | 23 |
| mystery | Nigeria (Enugu) | 4  | 1 | 2 | 38 |
| mystery | Nigeria (Enugu) | 6  | 2 | 1 | 11 |

|         |                 |    |   |   |    |
|---------|-----------------|----|---|---|----|
| mystery | Nigeria (Enugu) | 6  | 2 | 1 | 15 |
| mystery | Nigeria (Enugu) | 6  | 2 | 1 | 28 |
| mystery | Nigeria (Enugu) | 6  | 2 | 3 | 9  |
| mystery | Nigeria (Enugu) | 6  | 2 | 3 | 25 |
| mystery | Nigeria (Enugu) | 6  | 2 | 3 | 37 |
| mystery | Nigeria (Enugu) | 8  | 2 | 4 | 16 |
| mystery | Nigeria (Enugu) | 8  | 2 | 4 | 23 |
| mystery | Nigeria (Enugu) | 8  | 2 | 4 | 33 |
| mystery | Nigeria (Enugu) | 9  | 2 | 2 | 1  |
| mystery | Nigeria (Enugu) | 9  | 2 | 2 | 7  |
| mystery | Nigeria (Enugu) | 9  | 3 | 5 | 19 |
| mystery | Nigeria (Enugu) | 9  | 3 | 5 | 20 |
| mystery | Nigeria (Enugu) | 9  | 3 | 6 | 8  |
| mystery | Nigeria (Enugu) | 10 | 3 | 1 | 1  |
| mystery | Nigeria (Enugu) | 13 | 3 | 7 | 32 |
| mystery | Nigeria (Enugu) | 14 | 1 | 1 | 15 |
| mystery | Nigeria (Enugu) | 14 | 1 | 3 | 1  |
| mystery | Nigeria (Enugu) | 14 | 1 | 3 | 5  |
| mystery | Nigeria (Enugu) | 14 | 1 | 3 | 9  |
| mystery | Nigeria (Enugu) | 14 | 1 | 3 | 23 |
| mystery | Nigeria (Enugu) | 15 | 2 | 1 | 19 |
| mystery | Nigeria (Enugu) | 15 | 2 | 1 | 29 |
| mystery | Nigeria (Enugu) | 15 | 2 | 3 | 10 |
| mystery | Nigeria (Enugu) | 15 | 2 | 3 | 38 |
| mystery | Nigeria (Enugu) | 16 | 1 | 1 | 28 |
| mystery | Nigeria (Enugu) | 16 | 1 | 3 | 7  |
| mystery | Nigeria (Enugu) | 16 | 1 | 3 | 11 |
| mystery | Nigeria (Enugu) | 16 | 1 | 3 | 4  |
| mystery | Nigeria (Enugu) | 16 | 1 | 3 | 31 |
| mystery | Nigeria (Enugu) | 16 | 1 | 3 | 38 |
| mystery | Nigeria (Enugu) | 1  | 3 | 1 | 4  |
| mystery | Nigeria (Enugu) | 5  | 1 | 2 | 8  |
| mystery | Nigeria (Enugu) | 6  | 2 | 1 | 11 |
| mystery | Nigeria (Enugu) | 6  | 2 | 3 | 14 |
| mystery | Nigeria (Enugu) | 16 | 1 | 3 | 38 |
| mystery | Nigeria (Enugu) | 6  | 2 | 3 | 9  |
| overt   | Nigeria (Enugu) | 4  | 2 | 3 | 34 |
| overt   | Nigeria (Enugu) | 3  | 1 | 3 | 10 |
| overt   | Nigeria (Enugu) | 3  | 1 | 3 | 21 |
| mystery | Nigeria (Enugu) | 4  | 1 | 2 | 43 |
| overt   | Nigeria (Enugu) | 4  | 2 | 3 | 1  |
| overt   | Nigeria (Enugu) | 11 | 3 | 7 | 4  |
| overt   | Nigeria (Enugu) | 11 | 3 | 7 | 29 |
| overt   | Nigeria (Enugu) | 12 | 2 | 1 | 2  |
| overt   | Nigeria (Enugu) | 12 | 2 | 1 | 27 |
| overt   | Nigeria (Enugu) | 12 | 2 | 1 | 28 |
| overt   | Nigeria (Enugu) | 14 | 2 | 5 | 22 |
| overt   | Nigeria (Enugu) | 14 | 3 | 1 | 53 |
| overt   | Nigeria (Enugu) | 15 | 2 | 4 | 17 |
| overt   | Nigeria (Enugu) | 15 | 2 | 4 | 23 |

|       |                 |    |   |   |    |
|-------|-----------------|----|---|---|----|
| overt | Nigeria (Enugu) | 16 | 3 | 1 | 72 |
| overt | Nigeria (Enugu) | 16 | 3 | 1 | 83 |
| overt | Nigeria (Enugu) | 3  | 1 | 3 | 34 |
| overt | Nigeria (Enugu) | 11 | 3 | 7 | 9  |
| overt | Nigeria (Enugu) | 11 | 3 | 7 | 33 |
| overt | Nigeria (Enugu) | 15 | 2 | 4 | 17 |
| overt | Nigeria (Enugu) | 3  | 1 | 3 | 30 |
| overt | Nigeria (Enugu) | 4  | 2 | 3 | 27 |
| overt | Nigeria (Enugu) | 9  | 1 | 1 | 5  |
| overt | Nigeria (Enugu) | 11 | 3 | 5 | 20 |
| overt | Nigeria (Enugu) | 11 | 3 | 7 | 33 |
| overt | Nigeria (Enugu) | 12 | 2 | 6 | 6  |
| overt | Nigeria (Enugu) | 15 | 2 | 4 | 17 |
| overt | Nigeria (Enugu) | 15 | 2 | 4 | 42 |
| overt | Nigeria (Enugu) | 16 | 3 | 2 | 5  |
| overt | Nigeria (Enugu) | 17 | 1 | 2 | 51 |
| overt | Nigeria (Enugu) | 3  | 1 | 3 | 27 |
| overt | Nigeria (Enugu) | 4  | 2 | 3 | 20 |
| overt | Nigeria (Enugu) | 4  | 2 | 3 | 26 |
| overt | Nigeria (Enugu) | 4  | 2 | 3 | 37 |
| overt | Nigeria (Enugu) | 11 | 3 | 7 | 1  |
| overt | Nigeria (Enugu) | 11 | 3 | 7 | 28 |
| overt | Nigeria (Enugu) | 11 | 3 | 7 | 31 |
| overt | Nigeria (Enugu) | 12 | 2 | 1 | 28 |
| overt | Nigeria (Enugu) | 14 | 2 | 5 | 22 |
| overt | Nigeria (Enugu) | 14 | 3 | 1 | 14 |
| overt | Nigeria (Enugu) | 15 | 2 | 4 | 11 |
| overt | Nigeria (Enugu) | 15 | 2 | 4 | 14 |
| overt | Nigeria (Enugu) | 15 | 2 | 4 | 17 |
| overt | Nigeria (Enugu) | 15 | 2 | 4 | 34 |
| overt | Nigeria (Enugu) | 15 | 2 | 4 | 36 |
| overt | Nigeria (Enugu) | 15 | 2 | 4 | 39 |
| overt | Nigeria (Enugu) | 15 | 2 | 4 | 42 |
| overt | Nigeria (Enugu) | 16 | 3 | 1 | 69 |
| overt | Nigeria (Enugu) | 16 | 3 | 1 | 72 |
| overt | Nigeria (Enugu) | 16 | 3 | 2 | 5  |
| overt | Nigeria (Enugu) | 17 | 1 | 3 | 2  |
| overt | Nigeria (Enugu) | 3  | 1 | 3 | 10 |
| overt | Nigeria (Enugu) | 3  | 1 | 3 | 32 |
| overt | Nigeria (Enugu) | 4  | 2 | 1 | 10 |
| overt | Nigeria (Enugu) | 9  | 1 | 1 | 6  |
| overt | Nigeria (Enugu) | 9  | 1 | 2 | 29 |
| overt | Nigeria (Enugu) | 12 | 2 | 6 | 5  |
| overt | Nigeria (Enugu) | 14 | 2 | 5 | 2  |
| overt | Nigeria (Enugu) | 15 | 2 | 4 | 8  |
| overt | Nigeria (Enugu) | 16 | 3 | 1 | 74 |
| overt | Nigeria (Enugu) | 17 | 1 | 2 | 36 |
| overt | Nigeria (Enugu) | 3  | 1 | 3 | 34 |
| overt | Nigeria (Enugu) | 9  | 1 | 2 | 18 |
| overt | Nigeria (Enugu) | 15 | 2 | 4 | 11 |

|       |                 |    |   |   |    |
|-------|-----------------|----|---|---|----|
| overt | Nigeria (Enugu) | 17 | 1 | 2 | 19 |
| overt | Nigeria (Enugu) | 11 | 3 | 7 | 1  |
| overt | Nigeria (Enugu) | 14 | 2 | 5 | 2  |
| overt | Nigeria (Enugu) | 3  | 1 | 3 | 21 |
| overt | Nigeria (Enugu) | 9  | 1 | 1 | 6  |
| overt | Nigeria (Enugu) | 12 | 2 | 1 | 10 |
| overt | Nigeria (Enugu) | 17 | 1 | 2 | 59 |
| overt | Nigeria (Enugu) | 16 | 3 | 1 | 10 |
| overt | Nigeria (Enugu) | 4  | 2 | 3 | 28 |
| overt | Nigeria (Enugu) | 4  | 2 | 3 | 38 |
| overt | Nigeria (Enugu) | 3  | 1 | 3 | 9  |
| overt | Nigeria (Enugu) | 3  | 1 | 3 | 10 |
| overt | Nigeria (Enugu) | 3  | 1 | 3 | 11 |
| overt | Nigeria (Enugu) | 3  | 1 | 3 | 21 |
| overt | Nigeria (Enugu) | 3  | 1 | 3 | 33 |
| overt | Nigeria (Enugu) | 3  | 1 | 3 | 34 |
| overt | Nigeria (Enugu) | 3  | 2 | 3 | 3  |
| overt | Nigeria (Enugu) | 4  | 2 | 1 | 10 |
| overt | Nigeria (Enugu) | 4  | 2 | 3 | 8  |
| overt | Nigeria (Enugu) | 4  | 2 | 3 | 16 |
| overt | Nigeria (Enugu) | 4  | 2 | 3 | 20 |
| overt | Nigeria (Enugu) | 4  | 2 | 3 | 31 |
| overt | Nigeria (Enugu) | 4  | 2 | 3 | 38 |
| overt | Nigeria (Enugu) | 9  | 1 | 1 | 16 |
| overt | Nigeria (Enugu) | 11 | 3 | 7 | 28 |
| overt | Nigeria (Enugu) | 12 | 2 | 1 | 1  |
| overt | Nigeria (Enugu) | 12 | 2 | 1 | 10 |
| overt | Nigeria (Enugu) | 12 | 2 | 1 | 14 |
| overt | Nigeria (Enugu) | 12 | 2 | 6 | 1  |
| overt | Nigeria (Enugu) | 12 | 2 | 6 | 5  |
| overt | Nigeria (Enugu) | 14 | 3 | 1 | 8  |
| overt | Nigeria (Enugu) | 14 | 3 | 1 | 31 |
| overt | Nigeria (Enugu) | 14 | 3 | 1 | 62 |
| overt | Nigeria (Enugu) | 14 | 3 | 2 | 1  |
| overt | Nigeria (Enugu) | 15 | 2 | 4 | 8  |
| overt | Nigeria (Enugu) | 15 | 2 | 4 | 14 |
| overt | Nigeria (Enugu) | 15 | 2 | 4 | 25 |
| overt | Nigeria (Enugu) | 16 | 3 | 1 | 74 |
| overt | Nigeria (Enugu) | 16 | 3 | 1 | 76 |
| overt | Nigeria (Enugu) | 17 | 1 | 2 | 36 |
| overt | Nigeria (Enugu) | 17 | 1 | 2 | 57 |
| overt | Nigeria (Enugu) | 17 | 1 | 3 | 2  |
| overt | Nigeria (Enugu) | 17 | 1 | 3 | 3  |
| overt | Nigeria (Enugu) | 3  | 1 | 3 | 14 |
| overt | Nigeria (Enugu) | 9  | 1 | 2 | 20 |
| overt | Nigeria (Enugu) | 11 | 3 | 7 | 4  |
| overt | Nigeria (Enugu) | 16 | 3 | 1 | 72 |
| overt | Nigeria (Enugu) | 16 | 3 | 3 | 5  |
| overt | Nigeria (Enugu) | 3  | 1 | 3 | 7  |
| overt | Nigeria (Enugu) | 3  | 1 | 3 | 10 |



|         |                 |    |   |   |    |
|---------|-----------------|----|---|---|----|
| overt   | Nigeria (Enugu) | 3  | 1 | 3 | 27 |
| overt   | Nigeria (Enugu) | 3  | 1 | 3 | 31 |
| overt   | Nigeria (Enugu) | 4  | 2 | 1 | 10 |
| overt   | Nigeria (Enugu) | 4  | 2 | 3 | 1  |
| overt   | Nigeria (Enugu) | 4  | 2 | 3 | 26 |
| overt   | Nigeria (Enugu) | 4  | 2 | 3 | 27 |
| overt   | Nigeria (Enugu) | 4  | 2 | 3 | 28 |
| overt   | Nigeria (Enugu) | 4  | 2 | 3 | 37 |
| mystery | Nigeria (Enugu) | 5  | 1 | 2 | 44 |
| mystery | Nigeria (Enugu) | 5  | 1 | 2 | 51 |
| overt   | Nigeria (Enugu) | 9  | 1 | 2 | 28 |
| overt   | Nigeria (Enugu) | 11 | 3 | 5 | 20 |
| overt   | Nigeria (Enugu) | 11 | 3 | 7 | 25 |
| overt   | Nigeria (Enugu) | 12 | 2 | 1 | 10 |
| overt   | Nigeria (Enugu) | 12 | 2 | 6 | 6  |
| overt   | Nigeria (Enugu) | 14 | 2 | 5 | 2  |
| overt   | Nigeria (Enugu) | 14 | 2 | 5 | 6  |
| overt   | Nigeria (Enugu) | 14 | 2 | 5 | 25 |
| overt   | Nigeria (Enugu) | 14 | 3 | 1 | 10 |
| overt   | Nigeria (Enugu) | 14 | 3 | 1 | 21 |
| overt   | Nigeria (Enugu) | 14 | 3 | 1 | 59 |
| overt   | Nigeria (Enugu) | 15 | 2 | 4 | 34 |
| overt   | Nigeria (Enugu) | 16 | 3 | 2 | 5  |
| overt   | Nigeria (Enugu) | 17 | 1 | 2 | 33 |
| overt   | Nigeria (Enugu) | 17 | 1 | 2 | 60 |
| overt   | Nigeria (Enugu) | 3  | 1 | 3 | 10 |
| overt   | Nigeria (Enugu) | 3  | 1 | 3 | 34 |
| overt   | Nigeria (Enugu) | 4  | 2 | 1 | 10 |
| overt   | Nigeria (Enugu) | 4  | 2 | 3 | 27 |
| overt   | Nigeria (Enugu) | 4  | 2 | 3 | 28 |
| mystery | Nigeria (Enugu) | 5  | 1 | 2 | 42 |
| overt   | Nigeria (Enugu) | 9  | 1 | 1 | 7  |
| overt   | Nigeria (Enugu) | 11 | 3 | 5 | 20 |
| overt   | Nigeria (Enugu) | 11 | 3 | 7 | 9  |
| overt   | Nigeria (Enugu) | 12 | 2 | 1 | 17 |
| mystery | Nigeria (Enugu) | 4  | 1 | 2 | 43 |
| overt   | Nigeria (Enugu) | 9  | 1 | 1 | 6  |
| overt   | Nigeria (Enugu) | 11 | 3 | 7 | 25 |
| overt   | Nigeria (Enugu) | 12 | 2 | 1 | 2  |
| overt   | Nigeria (Enugu) | 14 | 3 | 1 | 14 |
| overt   | Nigeria (Enugu) | 16 | 3 | 2 | 5  |
| overt   | Nigeria (Enugu) | 4  | 2 | 1 | 10 |
| overt   | Nigeria (Enugu) | 4  | 2 | 3 | 8  |
| overt   | Nigeria (Enugu) | 12 | 2 | 1 | 1  |
| overt   | Nigeria (Enugu) | 12 | 2 | 1 | 10 |
| overt   | Nigeria (Enugu) | 14 | 2 | 5 | 6  |
| overt   | Nigeria (Enugu) | 14 | 3 | 2 | 1  |
| overt   | Nigeria (Enugu) | 15 | 2 | 4 | 7  |
| mystery | Nigeria (Enugu) | 5  | 1 | 2 | 42 |
| overt   | Nigeria (Enugu) | 14 | 3 | 1 | 21 |

|         |                 |    |   |   |    |
|---------|-----------------|----|---|---|----|
| overt   | Nigeria (Enugu) | 9  | 1 | 1 | 6  |
| overt   | Nigeria (Enugu) | 11 | 3 | 7 | 28 |
| overt   | Nigeria (Enugu) | 12 | 2 | 1 | 2  |
| overt   | Nigeria (Enugu) | 14 | 3 | 1 | 14 |
| overt   | Nigeria (Enugu) | 15 | 2 | 4 | 36 |
| overt   | Nigeria (Enugu) | 16 | 3 | 1 | 75 |
| overt   | Nigeria (Enugu) | 17 | 1 | 2 | 19 |
| mystery | Nigeria (Enugu) | 4  | 1 | 2 | 45 |
| mystery | Nigeria (Enugu) | 5  | 1 | 2 | 42 |
| overt   | Nigeria (Enugu) | 9  | 1 | 1 | 6  |
| overt   | Nigeria (Enugu) | 14 | 3 | 1 | 14 |
| overt   | Nigeria (Enugu) | 15 | 2 | 4 | 7  |
| overt   | Nigeria (Enugu) | 15 | 2 | 4 | 36 |
| overt   | Nigeria (Enugu) | 16 | 3 | 2 | 5  |
| overt   | Nigeria (Enugu) | 3  | 1 | 3 | 10 |
| overt   | Nigeria (Enugu) | 3  | 1 | 3 | 30 |
| overt   | Nigeria (Enugu) | 4  | 2 | 3 | 27 |
| overt   | Nigeria (Enugu) | 4  | 2 | 3 | 28 |
| overt   | Nigeria (Enugu) | 4  | 2 | 3 | 34 |
| mystery | Nigeria (Enugu) | 5  | 1 | 2 | 44 |
| overt   | Nigeria (Enugu) | 9  | 1 | 1 | 7  |
| overt   | Nigeria (Enugu) | 9  | 1 | 2 | 29 |
| overt   | Nigeria (Enugu) | 11 | 3 | 7 | 4  |
| overt   | Nigeria (Enugu) | 12 | 2 | 1 | 27 |
| overt   | Nigeria (Enugu) | 16 | 3 | 2 | 5  |
| overt   | Nigeria (Enugu) | 16 | 3 | 1 | 83 |
| overt   | Nigeria (Enugu) | 3  | 1 | 3 | 7  |
| overt   | Nigeria (Enugu) | 3  | 1 | 3 | 21 |
| overt   | Nigeria (Enugu) | 3  | 1 | 3 | 34 |
| mystery | Nigeria (Enugu) | 4  | 1 | 2 | 13 |
| overt   | Nigeria (Enugu) | 4  | 2 | 3 | 26 |
| overt   | Nigeria (Enugu) | 4  | 2 | 3 | 34 |
| overt   | Nigeria (Enugu) | 9  | 1 | 1 | 16 |
| overt   | Nigeria (Enugu) | 9  | 1 | 1 | 11 |
| overt   | Nigeria (Enugu) | 11 | 3 | 7 | 29 |
| overt   | Nigeria (Enugu) | 11 | 3 | 7 | 9  |
| overt   | Nigeria (Enugu) | 11 | 3 | 7 | 12 |
| overt   | Nigeria (Enugu) | 14 | 3 | 1 | 10 |
| overt   | Nigeria (Enugu) | 14 | 3 | 1 | 21 |
| overt   | Nigeria (Enugu) | 15 | 2 | 4 | 27 |
| overt   | Nigeria (Enugu) | 15 | 2 | 4 | 44 |
| overt   | Nigeria (Enugu) | 16 | 3 | 1 | 69 |
| overt   | Nigeria (Enugu) | 16 | 3 | 2 | 5  |
| overt   | Nigeria (Enugu) | 17 | 1 | 2 | 15 |
| overt   | Nigeria (Enugu) | 3  | 1 | 3 | 10 |
| overt   | Nigeria (Enugu) | 3  | 1 | 3 | 14 |
| overt   | Nigeria (Enugu) | 3  | 1 | 3 | 27 |
| mystery | Nigeria (Enugu) | 4  | 1 | 2 | 39 |
| mystery | Nigeria (Enugu) | 4  | 1 | 2 | 45 |
| overt   | Nigeria (Enugu) | 4  | 2 | 1 | 10 |

|         |                 |    |   |   |    |
|---------|-----------------|----|---|---|----|
| overt   | Nigeria (Enugu) | 4  | 2 | 3 | 1  |
| overt   | Nigeria (Enugu) | 4  | 2 | 3 | 24 |
| overt   | Nigeria (Enugu) | 4  | 2 | 3 | 27 |
| overt   | Nigeria (Enugu) | 4  | 2 | 3 | 28 |
| overt   | Nigeria (Enugu) | 4  | 2 | 3 | 31 |
| overt   | Nigeria (Enugu) | 9  | 1 | 1 | 10 |
| overt   | Nigeria (Enugu) | 9  | 1 | 2 | 19 |
| overt   | Nigeria (Enugu) | 9  | 1 | 2 | 25 |
| overt   | Nigeria (Enugu) | 9  | 1 | 2 | 28 |
| overt   | Nigeria (Enugu) | 11 | 3 | 6 | 1  |
| overt   | Nigeria (Enugu) | 11 | 3 | 7 | 4  |
| overt   | Nigeria (Enugu) | 11 | 3 | 7 | 28 |
| overt   | Nigeria (Enugu) | 11 | 3 | 7 | 31 |
| overt   | Nigeria (Enugu) | 12 | 2 | 1 | 10 |
| overt   | Nigeria (Enugu) | 12 | 2 | 6 | 6  |
| overt   | Nigeria (Enugu) | 14 | 2 | 5 | 2  |
| overt   | Nigeria (Enugu) | 14 | 2 | 5 | 25 |
| overt   | Nigeria (Enugu) | 15 | 2 | 4 | 22 |
| overt   | Nigeria (Enugu) | 15 | 2 | 4 | 34 |
| overt   | Nigeria (Enugu) | 16 | 3 | 1 | 74 |
| overt   | Nigeria (Enugu) | 16 | 3 | 3 | 5  |
| overt   | Nigeria (Enugu) | 17 | 1 | 2 | 18 |
| overt   | Nigeria (Enugu) | 17 | 1 | 2 | 39 |
| overt   | Nigeria (Enugu) | 17 | 1 | 2 | 57 |
| overt   | Nigeria (Enugu) | 14 | 2 | 5 | 2  |
| overt   | Nigeria (Enugu) | 17 | 1 | 2 | 33 |
| overt   | Nigeria (Enugu) | 3  | 1 | 3 | 33 |
| overt   | Nigeria (Enugu) | 3  | 1 | 3 | 11 |
| mystery | Nigeria (Enugu) | 4  | 1 | 2 | 43 |
| overt   | Nigeria (Enugu) | 9  | 1 | 1 | 16 |
| overt   | Nigeria (Enugu) | 9  | 1 | 2 | 18 |
| overt   | Nigeria (Enugu) | 9  | 1 | 2 | 20 |
| overt   | Nigeria (Enugu) | 15 | 2 | 4 | 4  |
| overt   | Nigeria (Enugu) | 14 | 2 | 5 | 6  |
| overt   | Nigeria (Enugu) | 3  | 1 | 3 | 33 |
| overt   | Nigeria (Enugu) | 14 | 2 | 5 | 2  |
| overt   | Nigeria (Enugu) | 15 | 2 | 4 | 4  |
| overt   | Nigeria (Enugu) | 3  | 1 | 3 | 10 |
| overt   | Nigeria (Enugu) | 3  | 1 | 3 | 31 |
| overt   | Nigeria (Enugu) | 3  | 1 | 3 | 32 |
| overt   | Nigeria (Enugu) | 3  | 1 | 3 | 33 |
| overt   | Nigeria (Enugu) | 3  | 2 | 3 | 3  |
| overt   | Nigeria (Enugu) | 3  | 2 | 5 | 12 |
| overt   | Nigeria (Enugu) | 11 | 3 | 7 | 9  |
| overt   | Nigeria (Enugu) | 11 | 3 | 7 | 28 |
| overt   | Nigeria (Enugu) | 12 | 2 | 1 | 14 |
| overt   | Nigeria (Enugu) | 14 | 3 | 1 | 42 |
| overt   | Nigeria (Enugu) | 15 | 2 | 4 | 7  |
| overt   | Nigeria (Enugu) | 16 | 3 | 1 | 77 |
| overt   | Nigeria (Enugu) | 16 | 3 | 1 | 83 |

|         |                 |    |   |   |    |
|---------|-----------------|----|---|---|----|
| overt   | Nigeria (Enugu) | 17 | 1 | 2 | 36 |
| overt   | Nigeria (Enugu) | 17 | 1 | 2 | 59 |
| overt   | Nigeria (Enugu) | 17 | 1 | 3 | 2  |
| overt   | Nigeria (Enugu) | 17 | 1 | 2 | 57 |
| overt   | Nigeria (Enugu) | 15 | 2 | 4 | 4  |
| overt   | Nigeria (Enugu) | 3  | 2 | 3 | 3  |
| overt   | Nigeria (Enugu) | 14 | 3 | 1 | 42 |
| overt   | Nigeria (Enugu) | 9  | 1 | 2 | 18 |
| overt   | Nigeria (Enugu) | 9  | 1 | 2 | 18 |
| overt   | Nigeria (Enugu) | 9  | 1 | 2 | 20 |
| overt   | Nigeria (Enugu) | 3  | 1 | 3 | 14 |
| overt   | Nigeria (Enugu) | 3  | 1 | 3 | 31 |
| overt   | Nigeria (Enugu) | 3  | 1 | 3 | 33 |
| overt   | Nigeria (Enugu) | 3  | 2 | 3 | 3  |
| overt   | Nigeria (Enugu) | 3  | 2 | 5 | 12 |
| overt   | Nigeria (Enugu) | 4  | 2 | 1 | 10 |
| overt   | Nigeria (Enugu) | 4  | 2 | 3 | 37 |
| overt   | Nigeria (Enugu) | 9  | 1 | 2 | 19 |
| overt   | Nigeria (Enugu) | 11 | 3 | 7 | 28 |
| overt   | Nigeria (Enugu) | 12 | 2 | 1 | 10 |
| overt   | Nigeria (Enugu) | 12 | 2 | 1 | 14 |
| overt   | Nigeria (Enugu) | 14 | 3 | 1 | 8  |
| overt   | Nigeria (Enugu) | 14 | 3 | 1 | 62 |
| overt   | Nigeria (Enugu) | 15 | 2 | 4 | 25 |
| overt   | Nigeria (Enugu) | 15 | 2 | 4 | 34 |
| overt   | Nigeria (Enugu) | 15 | 2 | 4 | 36 |
| overt   | Nigeria (Enugu) | 16 | 3 | 1 | 76 |
| overt   | Nigeria (Enugu) | 16 | 3 | 1 | 83 |
| overt   | Nigeria (Enugu) | 17 | 1 | 3 | 2  |
| overt   | Nigeria (Enugu) | 3  | 1 | 3 | 30 |
| overt   | Nigeria (Enugu) | 3  | 1 | 3 | 34 |
| overt   | Nigeria (Enugu) | 3  | 2 | 5 | 12 |
| mystery | Nigeria (Enugu) | 4  | 1 | 2 | 43 |
| overt   | Nigeria (Enugu) | 9  | 1 | 1 | 16 |
| overt   | Nigeria (Enugu) | 9  | 1 | 2 | 28 |
| overt   | Nigeria (Enugu) | 14 | 3 | 1 | 31 |
| overt   | Nigeria (Enugu) | 14 | 3 | 1 | 37 |
| overt   | Nigeria (Enugu) | 3  | 1 | 3 | 11 |
| overt   | Nigeria (Enugu) | 3  | 1 | 3 | 21 |
| overt   | Nigeria (Enugu) | 3  | 1 | 3 | 32 |
| overt   | Nigeria (Enugu) | 14 | 3 | 1 | 62 |
| overt   | Nigeria (Enugu) | 14 | 3 | 2 | 1  |
| overt   | Nigeria (Enugu) | 17 | 1 | 3 | 2  |
| overt   | Nigeria (Enugu) | 3  | 2 | 3 | 3  |
| overt   | Nigeria (Enugu) | 3  | 2 | 3 | 6  |
| overt   | Nigeria (Enugu) | 4  | 2 | 3 | 38 |
| overt   | Nigeria (Enugu) | 15 | 2 | 4 | 4  |
| mystery | Nigeria (Enugu) | 4  | 1 | 2 | 13 |
| overt   | Nigeria (Enugu) | 16 | 3 | 5 | 11 |
| overt   | Nigeria (Enugu) | 9  | 1 | 1 | 7  |

|       |                 |    |   |   |    |
|-------|-----------------|----|---|---|----|
| overt | Nigeria (Enugu) | 9  | 1 | 2 | 18 |
| overt | Nigeria (Enugu) | 17 | 1 | 2 | 36 |
| overt | Nigeria (Enugu) | 14 | 3 | 1 | 42 |
| overt | Nigeria (Enugu) | 16 | 3 | 1 | 77 |
| overt | Nigeria (Enugu) | 17 | 1 | 2 | 57 |
| overt | Nigeria (Enugu) | 4  | 2 | 3 | 28 |
| overt | Nigeria (Enugu) | 11 | 3 | 7 | 9  |
| overt | Nigeria (Enugu) | 12 | 2 | 1 | 27 |
| overt | Nigeria (Enugu) | 14 | 2 | 5 | 2  |
| overt | Nigeria (Enugu) | 15 | 2 | 4 | 4  |
| overt | Nigeria (Enugu) | 15 | 2 | 4 | 11 |
| overt | Nigeria (Enugu) | 15 | 2 | 4 | 42 |
| overt | Nigeria (Enugu) | 3  | 1 | 3 | 11 |
| overt | Nigeria (Enugu) | 3  | 2 | 5 | 12 |
| overt | Nigeria (Enugu) | 4  | 2 | 3 | 16 |
| overt | Nigeria (Enugu) | 4  | 2 | 3 | 21 |
| overt | Nigeria (Enugu) | 4  | 2 | 3 | 31 |
| overt | Nigeria (Enugu) | 9  | 1 | 1 | 7  |
| overt | Nigeria (Enugu) | 11 | 3 | 7 | 28 |
| overt | Nigeria (Enugu) | 11 | 3 | 6 | 1  |
| overt | Nigeria (Enugu) | 11 | 3 | 7 | 28 |
| overt | Nigeria (Enugu) | 12 | 2 | 6 | 5  |
| overt | Nigeria (Enugu) | 17 | 1 | 2 | 19 |
| overt | Nigeria (Enugu) | 3  | 1 | 3 | 31 |
| overt | Nigeria (Enugu) | 4  | 2 | 3 | 38 |
| overt | Nigeria (Enugu) | 9  | 1 | 1 | 16 |
| overt | Nigeria (Enugu) | 11 | 3 | 7 | 28 |
| overt | Nigeria (Enugu) | 12 | 2 | 1 | 27 |
| overt | Nigeria (Enugu) | 3  | 2 | 5 | 12 |
| overt | Nigeria (Enugu) | 4  | 2 | 3 | 1  |
| overt | Nigeria (Enugu) | 4  | 2 | 3 | 20 |
| overt | Nigeria (Enugu) | 4  | 2 | 3 | 21 |
| overt | Nigeria (Enugu) | 9  | 1 | 2 | 25 |
| overt | Nigeria (Enugu) | 12 | 2 | 1 | 28 |
| overt | Nigeria (Enugu) | 14 | 3 | 2 | 1  |
| overt | Nigeria (Enugu) | 15 | 2 | 4 | 4  |
| overt | Nigeria (Enugu) | 15 | 2 | 4 | 7  |
| overt | Nigeria (Enugu) | 15 | 2 | 4 | 25 |
| overt | Nigeria (Enugu) | 15 | 2 | 4 | 42 |
| overt | Nigeria (Enugu) | 15 | 2 | 4 | 11 |
| overt | Nigeria (Enugu) | 9  | 1 | 1 | 6  |
| overt | Nigeria (Enugu) | 15 | 2 | 4 | 4  |
| overt | Nigeria (Enugu) | 4  | 2 | 3 | 21 |
| overt | Nigeria (Enugu) | 4  | 2 | 3 | 28 |
| overt | Nigeria (Enugu) | 4  | 2 | 3 | 34 |
| overt | Nigeria (Enugu) | 4  | 2 | 3 | 37 |
| overt | Nigeria (Enugu) | 12 | 2 | 1 | 28 |
| overt | Nigeria (Enugu) | 12 | 2 | 6 | 5  |
| overt | Nigeria (Enugu) | 15 | 2 | 4 | 7  |
| overt | Nigeria (Enugu) | 15 | 2 | 4 | 11 |

|         |                 |    |   |   |    |
|---------|-----------------|----|---|---|----|
| overt   | Nigeria (Enugu) | 16 | 3 | 2 | 5  |
| overt   | Nigeria (Enugu) | 3  | 1 | 3 | 7  |
| overt   | Nigeria (Enugu) | 3  | 1 | 3 | 9  |
| overt   | Nigeria (Enugu) | 3  | 1 | 3 | 11 |
| overt   | Nigeria (Enugu) | 3  | 2 | 5 | 12 |
| overt   | Nigeria (Enugu) | 4  | 2 | 3 | 30 |
| overt   | Nigeria (Enugu) | 4  | 2 | 3 | 37 |
| mystery | Nigeria (Enugu) | 5  | 1 | 2 | 44 |
| overt   | Nigeria (Enugu) | 9  | 1 | 2 | 29 |
| overt   | Nigeria (Enugu) | 11 | 3 | 7 | 28 |
| overt   | Nigeria (Enugu) | 12 | 2 | 1 | 27 |
| overt   | Nigeria (Enugu) | 12 | 2 | 6 | 5  |
| overt   | Nigeria (Enugu) | 14 | 3 | 2 | 1  |
| overt   | Nigeria (Enugu) | 16 | 3 | 2 | 5  |
| overt   | Nigeria (Enugu) | 17 | 1 | 2 | 36 |
| overt   | Nigeria (Enugu) | 17 | 1 | 2 | 59 |
| overt   | Nigeria (Enugu) | 3  | 1 | 3 | 7  |
| overt   | Nigeria (Enugu) | 3  | 1 | 3 | 10 |
| overt   | Nigeria (Enugu) | 3  | 1 | 3 | 14 |
| overt   | Nigeria (Enugu) | 3  | 1 | 3 | 27 |
| overt   | Nigeria (Enugu) | 3  | 1 | 3 | 30 |
| overt   | Nigeria (Enugu) | 3  | 1 | 3 | 31 |
| overt   | Nigeria (Enugu) | 3  | 1 | 3 | 32 |
| overt   | Nigeria (Enugu) | 3  | 1 | 3 | 33 |
| overt   | Nigeria (Enugu) | 3  | 1 | 3 | 34 |
| overt   | Nigeria (Enugu) | 3  | 2 | 3 | 3  |
| overt   | Nigeria (Enugu) | 3  | 2 | 3 | 6  |
| overt   | Nigeria (Enugu) | 3  | 2 | 5 | 12 |
| mystery | Nigeria (Enugu) | 4  | 1 | 2 | 13 |
| mystery | Nigeria (Enugu) | 4  | 1 | 2 | 39 |
| overt   | Nigeria (Enugu) | 4  | 2 | 1 | 10 |
| overt   | Nigeria (Enugu) | 4  | 2 | 3 | 8  |
| overt   | Nigeria (Enugu) | 4  | 2 | 3 | 16 |
| overt   | Nigeria (Enugu) | 4  | 2 | 3 | 24 |
| overt   | Nigeria (Enugu) | 4  | 2 | 3 | 30 |
| overt   | Nigeria (Enugu) | 4  | 2 | 3 | 31 |
| overt   | Nigeria (Enugu) | 4  | 2 | 3 | 37 |
| overt   | Nigeria (Enugu) | 4  | 2 | 3 | 38 |
| mystery | Nigeria (Enugu) | 5  | 1 | 2 | 42 |
| overt   | Nigeria (Enugu) | 9  | 1 | 1 | 10 |
| overt   | Nigeria (Enugu) | 9  | 1 | 1 | 16 |
| overt   | Nigeria (Enugu) | 9  | 1 | 2 | 19 |
| overt   | Nigeria (Enugu) | 9  | 1 | 2 | 20 |
| overt   | Nigeria (Enugu) | 9  | 1 | 2 | 25 |
| overt   | Nigeria (Enugu) | 9  | 1 | 2 | 28 |
| overt   | Nigeria (Enugu) | 9  | 1 | 2 | 29 |
| overt   | Nigeria (Enugu) | 11 | 3 | 5 | 20 |
| overt   | Nigeria (Enugu) | 11 | 3 | 6 | 1  |
| overt   | Nigeria (Enugu) | 11 | 3 | 7 | 4  |
| overt   | Nigeria (Enugu) | 11 | 3 | 7 | 28 |

|       |                 |    |   |   |    |
|-------|-----------------|----|---|---|----|
| overt | Nigeria (Enugu) | 11 | 3 | 7 | 33 |
| overt | Nigeria (Enugu) | 12 | 2 | 1 | 2  |
| overt | Nigeria (Enugu) | 12 | 2 | 1 | 10 |
| overt | Nigeria (Enugu) | 12 | 2 | 1 | 14 |
| overt | Nigeria (Enugu) | 12 | 2 | 1 | 15 |
| overt | Nigeria (Enugu) | 12 | 2 | 6 | 5  |
| overt | Nigeria (Enugu) | 14 | 2 | 5 | 6  |
| overt | Nigeria (Enugu) | 14 | 2 | 5 | 22 |
| overt | Nigeria (Enugu) | 14 | 2 | 5 | 25 |
| overt | Nigeria (Enugu) | 14 | 3 | 1 | 8  |
| overt | Nigeria (Enugu) | 14 | 3 | 1 | 10 |
| overt | Nigeria (Enugu) | 14 | 3 | 1 | 14 |
| overt | Nigeria (Enugu) | 14 | 3 | 1 | 21 |
| overt | Nigeria (Enugu) | 14 | 3 | 1 | 31 |
| overt | Nigeria (Enugu) | 14 | 3 | 1 | 37 |
| overt | Nigeria (Enugu) | 14 | 3 | 1 | 53 |
| overt | Nigeria (Enugu) | 14 | 3 | 1 | 59 |
| overt | Nigeria (Enugu) | 14 | 3 | 1 | 62 |
| overt | Nigeria (Enugu) | 14 | 3 | 2 | 1  |
| overt | Nigeria (Enugu) | 15 | 2 | 4 | 8  |
| overt | Nigeria (Enugu) | 15 | 2 | 4 | 11 |
| overt | Nigeria (Enugu) | 15 | 2 | 4 | 25 |
| overt | Nigeria (Enugu) | 15 | 2 | 4 | 34 |
| overt | Nigeria (Enugu) | 15 | 2 | 4 | 36 |
| overt | Nigeria (Enugu) | 15 | 2 | 4 | 42 |
| overt | Nigeria (Enugu) | 15 | 2 | 4 | 44 |
| overt | Nigeria (Enugu) | 16 | 3 | 1 | 10 |
| overt | Nigeria (Enugu) | 16 | 3 | 1 | 74 |
| overt | Nigeria (Enugu) | 16 | 3 | 1 | 75 |
| overt | Nigeria (Enugu) | 16 | 3 | 1 | 76 |
| overt | Nigeria (Enugu) | 16 | 3 | 2 | 5  |
| overt | Nigeria (Enugu) | 16 | 3 | 3 | 5  |
| overt | Nigeria (Enugu) | 17 | 1 | 2 | 15 |
| overt | Nigeria (Enugu) | 17 | 1 | 2 | 19 |
| overt | Nigeria (Enugu) | 17 | 1 | 2 | 36 |
| overt | Nigeria (Enugu) | 17 | 1 | 2 | 39 |
| overt | Nigeria (Enugu) | 17 | 1 | 2 | 46 |
| overt | Nigeria (Enugu) | 17 | 1 | 2 | 51 |
| overt | Nigeria (Enugu) | 17 | 1 | 2 | 57 |
| overt | Nigeria (Enugu) | 17 | 1 | 3 | 2  |
| overt | Nigeria (Enugu) | 17 | 1 | 3 | 3  |
| overt | Nigeria (Enugu) | 3  | 1 | 3 | 11 |
| overt | Nigeria (Enugu) | 3  | 1 | 3 | 30 |
| overt | Nigeria (Enugu) | 3  | 2 | 5 | 12 |
| overt | Nigeria (Enugu) | 14 | 3 | 1 | 42 |
| overt | Nigeria (Enugu) | 3  | 1 | 3 | 9  |
| overt | Nigeria (Enugu) | 3  | 1 | 3 | 14 |
| overt | Nigeria (Enugu) | 3  | 1 | 3 | 31 |
| overt | Nigeria (Enugu) | 3  | 1 | 3 | 34 |
| overt | Nigeria (Enugu) | 3  | 2 | 3 | 3  |

|         |                 |    |   |   |    |
|---------|-----------------|----|---|---|----|
| mystery | Nigeria (Enugu) | 4  | 1 | 2 | 39 |
| overt   | Nigeria (Enugu) | 4  | 2 | 1 | 10 |
| overt   | Nigeria (Enugu) | 9  | 1 | 1 | 16 |
| overt   | Nigeria (Enugu) | 9  | 1 | 2 | 20 |
| overt   | Nigeria (Enugu) | 12 | 2 | 1 | 10 |
| overt   | Nigeria (Enugu) | 14 | 3 | 1 | 42 |
| overt   | Nigeria (Enugu) | 16 | 3 | 1 | 83 |
| overt   | Nigeria (Enugu) | 17 | 1 | 2 | 36 |
| overt   | Nigeria (Enugu) | 17 | 1 | 2 | 39 |
| overt   | Nigeria (Enugu) | 17 | 1 | 2 | 57 |
| overt   | Nigeria (Enugu) | 3  | 1 | 3 | 31 |
| overt   | Nigeria (Enugu) | 9  | 1 | 2 | 25 |
| overt   | Nigeria (Enugu) | 14 | 2 | 5 | 6  |
| overt   | Nigeria (Enugu) | 15 | 2 | 4 | 4  |
| overt   | Nigeria (Enugu) | 17 | 1 | 2 | 15 |
| overt   | Nigeria (Enugu) | 17 | 1 | 3 | 2  |
| overt   | Nigeria (Enugu) | 3  | 1 | 3 | 11 |
| overt   | Nigeria (Enugu) | 4  | 2 | 3 | 30 |
| overt   | Nigeria (Enugu) | 11 | 3 | 7 | 31 |
| overt   | Nigeria (Enugu) | 14 | 2 | 5 | 6  |
| overt   | Nigeria (Enugu) | 14 | 3 | 1 | 8  |
| overt   | Nigeria (Enugu) | 15 | 2 | 4 | 4  |
| overt   | Nigeria (Enugu) | 15 | 2 | 4 | 34 |
| overt   | Nigeria (Enugu) | 15 | 2 | 4 | 42 |
| overt   | Nigeria (Enugu) | 16 | 3 | 1 | 76 |
| overt   | Nigeria (Enugu) | 17 | 1 | 3 | 2  |
| overt   | Nigeria (Enugu) | 3  | 1 | 3 | 21 |
| overt   | Nigeria (Enugu) | 4  | 2 | 3 | 31 |
| overt   | Nigeria (Enugu) | 4  | 2 | 3 | 38 |
| mystery | Nigeria (Enugu) | 5  | 1 | 2 | 44 |
| overt   | Nigeria (Enugu) | 11 | 3 | 7 | 9  |
| overt   | Nigeria (Enugu) | 14 | 3 | 1 | 42 |
| overt   | Nigeria (Enugu) | 16 | 3 | 1 | 10 |
| overt   | Nigeria (Enugu) | 3  | 1 | 3 | 32 |
| overt   | Nigeria (Enugu) | 4  | 2 | 3 | 16 |
| overt   | Nigeria (Enugu) | 11 | 3 | 7 | 9  |
| overt   | Nigeria (Enugu) | 11 | 3 | 7 | 12 |
| overt   | Nigeria (Enugu) | 12 | 2 | 1 | 15 |
| overt   | Nigeria (Enugu) | 12 | 2 | 1 | 17 |
| overt   | Nigeria (Enugu) | 12 | 2 | 1 | 28 |
| overt   | Nigeria (Enugu) | 15 | 2 | 4 | 14 |
| overt   | Nigeria (Enugu) | 14 | 2 | 5 | 6  |
| overt   | Nigeria (Enugu) | 3  | 1 | 3 | 33 |
| overt   | Nigeria (Enugu) | 4  | 2 | 1 | 10 |
| overt   | Nigeria (Enugu) | 9  | 1 | 2 | 18 |
| overt   | Nigeria (Enugu) | 12 | 2 | 1 | 10 |
| overt   | Nigeria (Enugu) | 12 | 2 | 6 | 6  |
| overt   | Nigeria (Enugu) | 14 | 3 | 2 | 1  |
| overt   | Nigeria (Enugu) | 15 | 2 | 4 | 39 |
| overt   | Nigeria (Enugu) | 17 | 1 | 2 | 22 |



|         |                 |    |   |   |    |
|---------|-----------------|----|---|---|----|
| overt   | Nigeria (Enugu) | 3  | 1 | 3 | 10 |
| overt   | Nigeria (Enugu) | 3  | 1 | 3 | 26 |
| overt   | Nigeria (Enugu) | 3  | 1 | 3 | 27 |
| overt   | Nigeria (Enugu) | 3  | 1 | 3 | 33 |
| overt   | Nigeria (Enugu) | 3  | 1 | 3 | 34 |
| overt   | Nigeria (Enugu) | 4  | 2 | 3 | 16 |
| overt   | Nigeria (Enugu) | 4  | 2 | 3 | 20 |
| overt   | Nigeria (Enugu) | 9  | 1 | 1 | 5  |
| overt   | Nigeria (Enugu) | 9  | 1 | 2 | 19 |
| overt   | Nigeria (Enugu) | 9  | 1 | 2 | 22 |
| overt   | Nigeria (Enugu) | 9  | 1 | 2 | 28 |
| overt   | Nigeria (Enugu) | 12 | 2 | 1 | 2  |
| overt   | Nigeria (Enugu) | 12 | 2 | 1 | 14 |
| overt   | Nigeria (Enugu) | 12 | 2 | 6 | 1  |
| overt   | Nigeria (Enugu) | 12 | 2 | 6 | 5  |
| overt   | Nigeria (Enugu) | 14 | 2 | 5 | 2  |
| overt   | Nigeria (Enugu) | 14 | 3 | 1 | 10 |
| overt   | Nigeria (Enugu) | 14 | 3 | 1 | 31 |
| overt   | Nigeria (Enugu) | 14 | 3 | 1 | 37 |
| overt   | Nigeria (Enugu) | 14 | 3 | 2 | 1  |
| overt   | Nigeria (Enugu) | 15 | 2 | 4 | 7  |
| overt   | Nigeria (Enugu) | 15 | 2 | 4 | 17 |
| overt   | Nigeria (Enugu) | 15 | 2 | 4 | 22 |
| overt   | Nigeria (Enugu) | 15 | 2 | 4 | 39 |
| overt   | Nigeria (Enugu) | 16 | 3 | 1 | 10 |
| overt   | Nigeria (Enugu) | 16 | 3 | 1 | 69 |
| overt   | Nigeria (Enugu) | 16 | 3 | 1 | 72 |
| overt   | Nigeria (Enugu) | 17 | 1 | 2 | 18 |
| overt   | Nigeria (Enugu) | 17 | 1 | 2 | 19 |
| overt   | Nigeria (Enugu) | 17 | 1 | 2 | 36 |
| overt   | Nigeria (Enugu) | 17 | 1 | 2 | 39 |
| overt   | Nigeria (Enugu) | 17 | 1 | 2 | 46 |
| overt   | Nigeria (Enugu) | 17 | 1 | 2 | 51 |
| overt   | Nigeria (Enugu) | 17 | 1 | 2 | 57 |
| overt   | Nigeria (Enugu) | 17 | 1 | 2 | 59 |
| overt   | Nigeria (Enugu) | 3  | 1 | 3 | 30 |
| overt   | Nigeria (Enugu) | 17 | 1 | 2 | 33 |
| overt   | Nigeria (Enugu) | 9  | 1 | 1 | 16 |
| overt   | Nigeria (Enugu) | 17 | 1 | 2 | 59 |
| overt   | Nigeria (Enugu) | 3  | 1 | 3 | 10 |
| overt   | Nigeria (Enugu) | 9  | 1 | 2 | 19 |
| overt   | Nigeria (Enugu) | 12 | 2 | 1 | 1  |
| overt   | Nigeria (Enugu) | 9  | 1 | 2 | 18 |
| overt   | Nigeria (Enugu) | 3  | 1 | 3 | 9  |
| overt   | Nigeria (Enugu) | 3  | 1 | 3 | 10 |
| mystery | Nigeria (Enugu) | 4  | 1 | 2 | 45 |
| overt   | Nigeria (Enugu) | 9  | 1 | 1 | 10 |
| overt   | Nigeria (Enugu) | 15 | 2 | 4 | 7  |
| overt   | Nigeria (Enugu) | 3  | 1 | 3 | 30 |
| overt   | Nigeria (Enugu) | 17 | 1 | 2 | 33 |

|         |                 |    |   |   |    |
|---------|-----------------|----|---|---|----|
| mystery | Nigeria (Enugu) | 5  | 1 | 2 | 42 |
| mystery | Nigeria (Enugu) | 4  | 1 | 2 | 45 |
| overt   | Nigeria (Enugu) | 15 | 2 | 4 | 4  |
| overt   | Nigeria (Enugu) | 3  | 1 | 3 | 7  |
| overt   | Nigeria (Enugu) | 3  | 1 | 3 | 26 |
| overt   | Nigeria (Enugu) | 3  | 1 | 3 | 31 |
| overt   | Nigeria (Enugu) | 3  | 2 | 3 | 6  |
| overt   | Nigeria (Enugu) | 4  | 2 | 3 | 21 |
| overt   | Nigeria (Enugu) | 4  | 2 | 3 | 26 |
| overt   | Nigeria (Enugu) | 4  | 2 | 3 | 30 |
| overt   | Nigeria (Enugu) | 11 | 3 | 5 | 20 |
| overt   | Nigeria (Enugu) | 11 | 3 | 7 | 1  |
| overt   | Nigeria (Enugu) | 12 | 2 | 1 | 15 |
| overt   | Nigeria (Enugu) | 12 | 2 | 1 | 28 |
| overt   | Nigeria (Enugu) | 14 | 3 | 1 | 14 |
| overt   | Nigeria (Enugu) | 14 | 3 | 1 | 53 |
| overt   | Nigeria (Enugu) | 15 | 2 | 4 | 4  |
| overt   | Nigeria (Enugu) | 15 | 2 | 4 | 7  |
| overt   | Nigeria (Enugu) | 15 | 2 | 4 | 17 |
| overt   | Nigeria (Enugu) | 15 | 2 | 4 | 22 |
| overt   | Nigeria (Enugu) | 15 | 2 | 4 | 27 |
| overt   | Nigeria (Enugu) | 15 | 2 | 4 | 39 |
| overt   | Nigeria (Enugu) | 15 | 2 | 4 | 42 |
| overt   | Nigeria (Enugu) | 16 | 3 | 1 | 10 |
| overt   | Nigeria (Enugu) | 16 | 3 | 2 | 5  |
| overt   | Nigeria (Enugu) | 16 | 3 | 3 | 63 |
| overt   | Nigeria (Enugu) | 17 | 1 | 2 | 18 |
| overt   | Nigeria (Enugu) | 17 | 1 | 3 | 2  |
| overt   | Nigeria (Enugu) | 3  | 1 | 3 | 26 |
| mystery | Nigeria (Enugu) | 4  | 1 | 2 | 45 |
| overt   | Nigeria (Enugu) | 12 | 2 | 1 | 1  |
| overt   | Nigeria (Enugu) | 17 | 1 | 2 | 51 |
| overt   | Nigeria (Enugu) | 11 | 3 | 7 | 28 |
| overt   | Nigeria (Enugu) | 17 | 1 | 2 | 19 |
| overt   | Nigeria (Enugu) | 12 | 2 | 6 | 6  |
| overt   | Nigeria (Enugu) | 3  | 1 | 3 | 7  |
| overt   | Nigeria (Enugu) | 3  | 1 | 3 | 10 |
| overt   | Nigeria (Enugu) | 3  | 1 | 3 | 14 |
| overt   | Nigeria (Enugu) | 3  | 1 | 3 | 30 |
| overt   | Nigeria (Enugu) | 3  | 1 | 3 | 31 |
| overt   | Nigeria (Enugu) | 4  | 2 | 3 | 1  |
| overt   | Nigeria (Enugu) | 4  | 2 | 3 | 37 |
| overt   | Nigeria (Enugu) | 11 | 3 | 7 | 28 |
| overt   | Nigeria (Enugu) | 12 | 2 | 6 | 1  |
| overt   | Nigeria (Enugu) | 12 | 2 | 6 | 6  |
| overt   | Nigeria (Enugu) | 14 | 2 | 5 | 2  |
| overt   | Nigeria (Enugu) | 14 | 2 | 5 | 6  |
| overt   | Nigeria (Enugu) | 14 | 3 | 2 | 1  |
| overt   | Nigeria (Enugu) | 15 | 2 | 4 | 39 |
| overt   | Nigeria (Enugu) | 17 | 1 | 2 | 59 |

|       |                 |    |   |   |    |
|-------|-----------------|----|---|---|----|
| overt | Nigeria (Enugu) | 17 | 1 | 3 | 3  |
| overt | Nigeria (Enugu) | 3  | 1 | 3 | 7  |
| overt | Nigeria (Enugu) | 3  | 1 | 3 | 10 |
| overt | Nigeria (Enugu) | 3  | 1 | 3 | 14 |
| overt | Nigeria (Enugu) | 12 | 2 | 6 | 1  |
| overt | Nigeria (Enugu) | 17 | 1 | 2 | 59 |
| overt | Nigeria (Enugu) | 3  | 1 | 3 | 21 |
| overt | Nigeria (Enugu) | 3  | 2 | 5 | 12 |
| overt | Nigeria (Enugu) | 3  | 1 | 3 | 11 |
| overt | Nigeria (Enugu) | 11 | 3 | 7 | 28 |
| overt | Nigeria (Enugu) | 16 | 3 | 1 | 77 |
| overt | Nigeria (Enugu) | 3  | 1 | 3 | 11 |
| overt | Nigeria (Enugu) | 3  | 2 | 3 | 3  |
| overt | Nigeria (Enugu) | 12 | 2 | 1 | 27 |
| overt | Nigeria (Enugu) | 12 | 2 | 6 | 1  |
| overt | Nigeria (Enugu) | 17 | 1 | 2 | 59 |
| overt | Nigeria (Enugu) | 3  | 1 | 3 | 9  |
| overt | Nigeria (Enugu) | 3  | 1 | 3 | 21 |
| overt | Nigeria (Enugu) | 3  | 1 | 3 | 33 |
| overt | Nigeria (Enugu) | 3  | 1 | 3 | 34 |
| overt | Nigeria (Enugu) | 3  | 2 | 3 | 6  |
| overt | Nigeria (Enugu) | 9  | 1 | 2 | 28 |
| overt | Nigeria (Enugu) | 11 | 3 | 7 | 25 |
| overt | Nigeria (Enugu) | 11 | 3 | 7 | 28 |
| overt | Nigeria (Enugu) | 12 | 2 | 1 | 14 |
| overt | Nigeria (Enugu) | 12 | 2 | 1 | 27 |
| overt | Nigeria (Enugu) | 12 | 2 | 6 | 1  |
| overt | Nigeria (Enugu) | 12 | 2 | 6 | 5  |
| overt | Nigeria (Enugu) | 14 | 2 | 5 | 2  |
| overt | Nigeria (Enugu) | 14 | 3 | 1 | 14 |
| overt | Nigeria (Enugu) | 16 | 3 | 1 | 77 |
| overt | Nigeria (Enugu) | 17 | 1 | 2 | 18 |
| overt | Nigeria (Enugu) | 17 | 1 | 2 | 36 |
| overt | Nigeria (Enugu) | 17 | 1 | 2 | 57 |
| overt | Nigeria (Enugu) | 17 | 1 | 3 | 3  |
| overt | Nigeria (Enugu) | 3  | 1 | 3 | 33 |
| overt | Nigeria (Enugu) | 12 | 2 | 6 | 1  |
| overt | Nigeria (Enugu) | 3  | 1 | 3 | 33 |
| overt | Nigeria (Enugu) | 12 | 2 | 6 | 6  |
| overt | Nigeria (Enugu) | 17 | 1 | 2 | 57 |
| overt | Nigeria (Enugu) | 3  | 1 | 3 | 7  |
| overt | Nigeria (Enugu) | 3  | 1 | 3 | 31 |
| overt | Nigeria (Enugu) | 3  | 1 | 3 | 34 |
| overt | Nigeria (Enugu) | 12 | 2 | 6 | 1  |
| overt | Nigeria (Enugu) | 14 | 2 | 5 | 2  |
| overt | Nigeria (Enugu) | 14 | 3 | 1 | 59 |
| overt | Nigeria (Enugu) | 1  | 1 | 3 | 9  |
| overt | Nigeria (Enugu) | 3  | 1 | 3 | 11 |
| overt | Nigeria (Enugu) | 3  | 1 | 3 | 30 |
| overt | Nigeria (Enugu) | 3  | 1 | 3 | 33 |

|         |                 |    |   |   |    |
|---------|-----------------|----|---|---|----|
| overt   | Nigeria (Enugu) | 3  | 2 | 3 | 6  |
| overt   | Nigeria (Enugu) | 3  | 2 | 5 | 12 |
| overt   | Nigeria (Enugu) | 4  | 2 | 1 | 10 |
| overt   | Nigeria (Enugu) | 4  | 2 | 3 | 16 |
| overt   | Nigeria (Enugu) | 4  | 2 | 3 | 30 |
| overt   | Nigeria (Enugu) | 12 | 2 | 1 | 27 |
| overt   | Nigeria (Enugu) | 11 | 3 | 7 | 28 |
| overt   | Nigeria (Enugu) | 12 | 2 | 6 | 1  |
| overt   | Nigeria (Enugu) | 16 | 3 | 1 | 77 |
| overt   | Nigeria (Enugu) | 17 | 1 | 2 | 59 |
| overt   | Nigeria (Enugu) | 17 | 1 | 3 | 3  |
| overt   | Nigeria (Enugu) | 17 | 1 | 2 | 51 |
| overt   | Nigeria (Enugu) | 3  | 1 | 3 | 7  |
| overt   | Nigeria (Enugu) | 3  | 1 | 3 | 9  |
| overt   | Nigeria (Enugu) | 3  | 1 | 3 | 10 |
| overt   | Nigeria (Enugu) | 3  | 1 | 3 | 11 |
| overt   | Nigeria (Enugu) | 3  | 1 | 3 | 21 |
| overt   | Nigeria (Enugu) | 3  | 1 | 3 | 26 |
| overt   | Nigeria (Enugu) | 3  | 1 | 3 | 27 |
| overt   | Nigeria (Enugu) | 3  | 1 | 3 | 32 |
| overt   | Nigeria (Enugu) | 3  | 1 | 3 | 34 |
| mystery | Nigeria (Enugu) | 4  | 1 | 2 | 13 |
| mystery | Nigeria (Enugu) | 4  | 1 | 2 | 39 |
| mystery | Nigeria (Enugu) | 4  | 1 | 2 | 40 |
| mystery | Nigeria (Enugu) | 4  | 1 | 2 | 43 |
| mystery | Nigeria (Enugu) | 4  | 1 | 2 | 45 |
| overt   | Nigeria (Enugu) | 4  | 2 | 1 | 10 |
| overt   | Nigeria (Enugu) | 4  | 2 | 3 | 1  |
| overt   | Nigeria (Enugu) | 4  | 2 | 3 | 16 |
| overt   | Nigeria (Enugu) | 4  | 2 | 3 | 20 |
| overt   | Nigeria (Enugu) | 4  | 2 | 3 | 24 |
| overt   | Nigeria (Enugu) | 4  | 2 | 3 | 26 |
| overt   | Nigeria (Enugu) | 4  | 2 | 3 | 37 |
| mystery | Nigeria (Enugu) | 5  | 1 | 2 | 44 |
| overt   | Nigeria (Enugu) | 9  | 1 | 1 | 5  |
| overt   | Nigeria (Enugu) | 9  | 1 | 1 | 7  |
| overt   | Nigeria (Enugu) | 9  | 1 | 1 | 10 |
| overt   | Nigeria (Enugu) | 9  | 1 | 2 | 25 |
| overt   | Nigeria (Enugu) | 9  | 1 | 2 | 28 |
| overt   | Nigeria (Enugu) | 11 | 3 | 5 | 20 |
| overt   | Nigeria (Enugu) | 11 | 3 | 7 | 1  |
| overt   | Nigeria (Enugu) | 11 | 3 | 7 | 4  |
| overt   | Nigeria (Enugu) | 11 | 3 | 7 | 25 |
| overt   | Nigeria (Enugu) | 11 | 3 | 7 | 28 |
| overt   | Nigeria (Enugu) | 11 | 3 | 7 | 33 |
| overt   | Nigeria (Enugu) | 12 | 2 | 1 | 2  |
| overt   | Nigeria (Enugu) | 12 | 2 | 1 | 10 |
| overt   | Nigeria (Enugu) | 12 | 2 | 1 | 14 |
| overt   | Nigeria (Enugu) | 12 | 2 | 1 | 15 |
| overt   | Nigeria (Enugu) | 12 | 2 | 6 | 1  |

|         |                 |    |   |   |    |
|---------|-----------------|----|---|---|----|
| overt   | Nigeria (Enugu) | 12 | 2 | 6 | 5  |
| overt   | Nigeria (Enugu) | 14 | 2 | 5 | 2  |
| overt   | Nigeria (Enugu) | 14 | 2 | 5 | 6  |
| overt   | Nigeria (Enugu) | 14 | 2 | 5 | 22 |
| overt   | Nigeria (Enugu) | 14 | 2 | 5 | 25 |
| overt   | Nigeria (Enugu) | 14 | 3 | 1 | 8  |
| overt   | Nigeria (Enugu) | 14 | 3 | 1 | 10 |
| overt   | Nigeria (Enugu) | 14 | 3 | 1 | 21 |
| overt   | Nigeria (Enugu) | 14 | 3 | 1 | 37 |
| overt   | Nigeria (Enugu) | 14 | 3 | 1 | 53 |
| overt   | Nigeria (Enugu) | 14 | 3 | 1 | 59 |
| overt   | Nigeria (Enugu) | 14 | 3 | 2 | 1  |
| overt   | Nigeria (Enugu) | 15 | 2 | 4 | 7  |
| overt   | Nigeria (Enugu) | 15 | 2 | 4 | 8  |
| overt   | Nigeria (Enugu) | 15 | 2 | 4 | 11 |
| overt   | Nigeria (Enugu) | 15 | 2 | 4 | 14 |
| overt   | Nigeria (Enugu) | 15 | 2 | 4 | 22 |
| overt   | Nigeria (Enugu) | 15 | 2 | 4 | 23 |
| overt   | Nigeria (Enugu) | 15 | 2 | 4 | 25 |
| overt   | Nigeria (Enugu) | 15 | 2 | 4 | 39 |
| overt   | Nigeria (Enugu) | 15 | 2 | 4 | 44 |
| overt   | Nigeria (Enugu) | 16 | 3 | 1 | 74 |
| overt   | Nigeria (Enugu) | 16 | 3 | 1 | 80 |
| overt   | Nigeria (Enugu) | 16 | 3 | 1 | 83 |
| overt   | Nigeria (Enugu) | 16 | 3 | 3 | 5  |
| overt   | Nigeria (Enugu) | 17 | 1 | 2 | 15 |
| overt   | Nigeria (Enugu) | 17 | 1 | 2 | 33 |
| overt   | Nigeria (Enugu) | 17 | 1 | 2 | 36 |
| overt   | Nigeria (Enugu) | 17 | 1 | 2 | 39 |
| overt   | Nigeria (Enugu) | 17 | 1 | 2 | 57 |
| overt   | Nigeria (Enugu) | 17 | 1 | 3 | 3  |
| mystery | Nigeria (Enugu) | 4  | 1 | 2 | 43 |
| overt   | Nigeria (Enugu) | 17 | 1 | 2 | 22 |
| overt   | Nigeria (Enugu) | 9  | 1 | 2 | 20 |
| overt   | Nigeria (Enugu) | 12 | 2 | 1 | 17 |
| overt   | Nigeria (Enugu) | 14 | 3 | 1 | 59 |
| mystery | Nigeria (Enugu) | 5  | 1 | 2 | 42 |
| overt   | Nigeria (Enugu) | 3  | 1 | 3 | 7  |
| overt   | Nigeria (Enugu) | 12 | 2 | 6 | 1  |
| overt   | Nigeria (Enugu) | 14 | 3 | 7 | 62 |
| overt   | Nigeria (Enugu) | 15 | 2 | 4 | 25 |
| overt   | Nigeria (Enugu) | 17 | 1 | 2 | 22 |
| overt   | Nigeria (Enugu) | 3  | 1 | 3 | 10 |
| overt   | Nigeria (Enugu) | 3  | 1 | 3 | 14 |
| overt   | Nigeria (Enugu) | 3  | 1 | 3 | 21 |
| overt   | Nigeria (Enugu) | 3  | 1 | 3 | 27 |
| overt   | Nigeria (Enugu) | 3  | 1 | 3 | 30 |
| overt   | Nigeria (Enugu) | 3  | 1 | 3 | 34 |
| overt   | Nigeria (Enugu) | 3  | 2 | 5 | 12 |
| mystery | Nigeria (Enugu) | 4  | 1 | 2 | 43 |

|       |                 |    |   |   |    |
|-------|-----------------|----|---|---|----|
| overt | Nigeria (Enugu) | 4  | 2 | 1 | 10 |
| overt | Nigeria (Enugu) | 4  | 2 | 3 | 8  |
| overt | Nigeria (Enugu) | 4  | 2 | 3 | 20 |
| overt | Nigeria (Enugu) | 4  | 2 | 3 | 21 |
| overt | Nigeria (Enugu) | 9  | 1 | 1 | 6  |
| overt | Nigeria (Enugu) | 9  | 1 | 1 | 16 |
| overt | Nigeria (Enugu) | 9  | 1 | 2 | 19 |
| overt | Nigeria (Enugu) | 9  | 1 | 2 | 29 |
| overt | Nigeria (Enugu) | 11 | 3 | 5 | 20 |
| overt | Nigeria (Enugu) | 11 | 3 | 7 | 1  |
| overt | Nigeria (Enugu) | 11 | 3 | 7 | 28 |
| overt | Nigeria (Enugu) | 11 | 3 | 7 | 33 |
| overt | Nigeria (Enugu) | 12 | 2 | 1 | 2  |
| overt | Nigeria (Enugu) | 12 | 2 | 1 | 14 |
| overt | Nigeria (Enugu) | 12 | 2 | 1 | 28 |
| overt | Nigeria (Enugu) | 12 | 2 | 6 | 1  |
| overt | Nigeria (Enugu) | 14 | 2 | 5 | 2  |
| overt | Nigeria (Enugu) | 14 | 2 | 5 | 6  |
| overt | Nigeria (Enugu) | 14 | 3 | 1 | 37 |
| overt | Nigeria (Enugu) | 14 | 3 | 1 | 59 |
| overt | Nigeria (Enugu) | 14 | 3 | 2 | 1  |
| overt | Nigeria (Enugu) | 15 | 2 | 4 | 8  |
| overt | Nigeria (Enugu) | 15 | 2 | 4 | 14 |
| overt | Nigeria (Enugu) | 15 | 2 | 4 | 22 |
| overt | Nigeria (Enugu) | 15 | 2 | 4 | 25 |
| overt | Nigeria (Enugu) | 15 | 2 | 4 | 36 |
| overt | Nigeria (Enugu) | 15 | 2 | 4 | 42 |
| overt | Nigeria (Enugu) | 16 | 3 | 1 | 77 |
| overt | Nigeria (Enugu) | 16 | 3 | 1 | 83 |
| overt | Nigeria (Enugu) | 16 | 3 | 2 | 5  |
| overt | Nigeria (Enugu) | 17 | 1 | 2 | 15 |
| overt | Nigeria (Enugu) | 17 | 1 | 2 | 19 |
| overt | Nigeria (Enugu) | 17 | 1 | 2 | 22 |
| overt | Nigeria (Enugu) | 17 | 1 | 2 | 36 |
| overt | Nigeria (Enugu) | 17 | 1 | 2 | 46 |
| overt | Nigeria (Enugu) | 17 | 1 | 2 | 57 |
| overt | Nigeria (Enugu) | 17 | 1 | 2 | 59 |
| overt | Nigeria (Enugu) | 17 | 1 | 3 | 2  |
| overt | Nigeria (Enugu) | 17 | 1 | 3 | 3  |
| overt | Nigeria (Enugu) | 11 | 3 | 6 | 1  |
| overt | Nigeria (Enugu) | 3  | 1 | 3 | 10 |
| overt | Nigeria (Enugu) | 4  | 2 | 3 | 16 |
| overt | Nigeria (Enugu) | 12 | 2 | 6 | 6  |
| overt | Nigeria (Enugu) | 15 | 2 | 4 | 4  |
| overt | Nigeria (Enugu) | 15 | 2 | 4 | 4  |
| overt | Nigeria (Enugu) | 15 | 2 | 4 | 4  |
| overt | Nigeria (Enugu) | 11 | 3 | 7 | 31 |
| overt | Nigeria (Enugu) | 11 | 3 | 7 | 33 |
| overt | Nigeria (Enugu) | 3  | 1 | 3 | 9  |
| overt | Nigeria (Enugu) | 3  | 1 | 3 | 14 |

|         |                 |    |   |   |    |
|---------|-----------------|----|---|---|----|
| overt   | Nigeria (Enugu) | 4  | 2 | 3 | 37 |
| overt   | Nigeria (Enugu) | 12 | 2 | 6 | 5  |
| overt   | Nigeria (Enugu) | 14 | 3 | 1 | 8  |
| overt   | Nigeria (Enugu) | 16 | 3 | 1 | 83 |
| overt   | Nigeria (Enugu) | 12 | 2 | 6 | 5  |
| overt   | Nigeria (Enugu) | 3  | 1 | 3 | 10 |
| overt   | Nigeria (Enugu) | 4  | 2 | 1 | 10 |
| overt   | Nigeria (Enugu) | 12 | 2 | 1 | 10 |
| overt   | Nigeria (Enugu) | 3  | 2 | 3 | 3  |
| overt   | Nigeria (Enugu) | 12 | 2 | 1 | 27 |
| overt   | Nigeria (Enugu) | 3  | 1 | 3 | 30 |
| overt   | Nigeria (Enugu) | 16 | 3 | 1 | 10 |
| overt   | Nigeria (Enugu) | 9  | 1 | 1 | 6  |
| overt   | Nigeria (Enugu) | 9  | 1 | 2 | 29 |
| overt   | Nigeria (Enugu) | 12 | 2 | 1 | 27 |
| overt   | Nigeria (Enugu) | 12 | 2 | 6 | 5  |
| overt   | Nigeria (Enugu) | 3  | 1 | 3 | 10 |
| overt   | Nigeria (Enugu) | 3  | 1 | 3 | 11 |
| overt   | Nigeria (Enugu) | 3  | 1 | 3 | 33 |
| overt   | Nigeria (Enugu) | 4  | 2 | 1 | 10 |
| overt   | Nigeria (Enugu) | 4  | 2 | 3 | 16 |
| overt   | Nigeria (Enugu) | 4  | 2 | 3 | 28 |
| overt   | Nigeria (Enugu) | 9  | 1 | 2 | 29 |
| overt   | Nigeria (Enugu) | 11 | 3 | 7 | 33 |
| overt   | Nigeria (Enugu) | 12 | 2 | 1 | 1  |
| overt   | Nigeria (Enugu) | 12 | 2 | 1 | 27 |
| overt   | Nigeria (Enugu) | 12 | 2 | 6 | 1  |
| overt   | Nigeria (Enugu) | 14 | 2 | 5 | 2  |
| overt   | Nigeria (Enugu) | 16 | 3 | 5 | 11 |
| overt   | Nigeria (Enugu) | 15 | 2 | 4 | 4  |
| overt   | Nigeria (Enugu) | 3  | 1 | 3 | 11 |
| mystery | Nigeria (Enugu) | 4  | 1 | 2 | 13 |
| mystery | Nigeria (Enugu) | 4  | 1 | 2 | 43 |
| overt   | Nigeria (Enugu) | 9  | 1 | 2 | 25 |
| overt   | Nigeria (Enugu) | 12 | 2 | 6 | 5  |
| mystery | Nigeria (Enugu) | 4  | 1 | 2 | 43 |
| overt   | Nigeria (Enugu) | 12 | 2 | 1 | 14 |
| overt   | Nigeria (Enugu) | 17 | 1 | 2 | 22 |
| overt   | Nigeria (Enugu) | 14 | 3 | 1 | 8  |
| overt   | Nigeria (Enugu) | 14 | 3 | 1 | 14 |
| overt   | Nigeria (Enugu) | 14 | 3 | 2 | 1  |
| overt   | Nigeria (Enugu) | 4  | 2 | 3 | 38 |
| overt   | Nigeria (Enugu) | 16 | 3 | 1 | 83 |
| overt   | Nigeria (Enugu) | 3  | 1 | 3 | 30 |
| overt   | Nigeria (Enugu) | 3  | 1 | 3 | 9  |
| overt   | Nigeria (Enugu) | 3  | 1 | 3 | 10 |
| overt   | Nigeria (Enugu) | 3  | 1 | 3 | 11 |
| overt   | Nigeria (Enugu) | 3  | 1 | 3 | 14 |
| overt   | Nigeria (Enugu) | 3  | 1 | 3 | 21 |
| overt   | Nigeria (Enugu) | 3  | 1 | 3 | 27 |

|         |                 |    |   |   |    |
|---------|-----------------|----|---|---|----|
| overt   | Nigeria (Enugu) | 3  | 1 | 3 | 31 |
| overt   | Nigeria (Enugu) | 3  | 1 | 3 | 33 |
| overt   | Nigeria (Enugu) | 3  | 1 | 3 | 34 |
| overt   | Nigeria (Enugu) | 4  | 2 | 1 | 10 |
| overt   | Nigeria (Enugu) | 9  | 1 | 1 | 7  |
| overt   | Nigeria (Enugu) | 9  | 1 | 1 | 10 |
| overt   | Nigeria (Enugu) | 9  | 1 | 2 | 20 |
| overt   | Nigeria (Enugu) | 9  | 1 | 2 | 29 |
| overt   | Nigeria (Enugu) | 11 | 3 | 7 | 33 |
| overt   | Nigeria (Enugu) | 12 | 2 | 1 | 10 |
| overt   | Nigeria (Enugu) | 12 | 2 | 1 | 14 |
| overt   | Nigeria (Enugu) | 12 | 2 | 1 | 15 |
| overt   | Nigeria (Enugu) | 12 | 2 | 1 | 27 |
| overt   | Nigeria (Enugu) | 12 | 2 | 1 | 28 |
| overt   | Nigeria (Enugu) | 14 | 2 | 5 | 2  |
| overt   | Nigeria (Enugu) | 14 | 3 | 1 | 8  |
| overt   | Nigeria (Enugu) | 14 | 3 | 1 | 10 |
| overt   | Nigeria (Enugu) | 14 | 3 | 1 | 14 |
| overt   | Nigeria (Enugu) | 14 | 3 | 1 | 42 |
| overt   | Nigeria (Enugu) | 15 | 2 | 4 | 7  |
| overt   | Nigeria (Enugu) | 15 | 2 | 4 | 8  |
| overt   | Nigeria (Enugu) | 15 | 2 | 4 | 11 |
| overt   | Nigeria (Enugu) | 15 | 2 | 4 | 14 |
| overt   | Nigeria (Enugu) | 15 | 2 | 4 | 22 |
| overt   | Nigeria (Enugu) | 15 | 2 | 4 | 42 |
| overt   | Nigeria (Enugu) | 15 | 2 | 4 | 44 |
| overt   | Nigeria (Enugu) | 16 | 3 | 1 | 76 |
| overt   | Nigeria (Enugu) | 16 | 3 | 1 | 83 |
| mystery | Nigeria (Enugu) | 5  | 1 | 2 | 42 |
| overt   | Nigeria (Enugu) | 12 | 2 | 6 | 6  |
| overt   | Nigeria (Enugu) | 3  | 1 | 3 | 14 |
| overt   | Nigeria (Enugu) | 3  | 1 | 3 | 30 |
| overt   | Nigeria (Enugu) | 12 | 2 | 6 | 1  |
| overt   | Nigeria (Enugu) | 3  | 1 | 3 | 10 |
| overt   | Nigeria (Enugu) | 3  | 1 | 3 | 11 |
| overt   | Nigeria (Enugu) | 3  | 1 | 3 | 14 |
| overt   | Nigeria (Enugu) | 3  | 1 | 3 | 34 |
| mystery | Nigeria (Enugu) | 4  | 1 | 2 | 43 |
| mystery | Nigeria (Enugu) | 5  | 1 | 2 | 44 |
| overt   | Nigeria (Enugu) | 9  | 1 | 2 | 28 |
| overt   | Nigeria (Enugu) | 12 | 2 | 6 | 1  |
| overt   | Nigeria (Enugu) | 3  | 1 | 3 | 9  |
| overt   | Nigeria (Enugu) | 3  | 1 | 3 | 10 |
| overt   | Nigeria (Enugu) | 3  | 1 | 3 | 21 |
| overt   | Nigeria (Enugu) | 3  | 1 | 3 | 33 |
| overt   | Nigeria (Enugu) | 3  | 1 | 3 | 34 |
| overt   | Nigeria (Enugu) | 3  | 2 | 3 | 3  |
| mystery | Nigeria (Enugu) | 4  | 1 | 2 | 43 |
| mystery | Nigeria (Enugu) | 5  | 1 | 2 | 51 |
| overt   | Nigeria (Enugu) | 9  | 1 | 1 | 10 |



|         |                 |    |   |   |    |
|---------|-----------------|----|---|---|----|
| overt   | Nigeria (Enugu) | 9  | 1 | 2 | 25 |
| overt   | Nigeria (Enugu) | 12 | 2 | 6 | 1  |
| overt   | Nigeria (Enugu) | 12 | 2 | 6 | 5  |
| overt   | Nigeria (Enugu) | 14 | 3 | 1 | 10 |
| overt   | Nigeria (Enugu) | 14 | 3 | 1 | 14 |
| overt   | Nigeria (Enugu) | 14 | 3 | 1 | 21 |
| overt   | Nigeria (Enugu) | 15 | 2 | 4 | 8  |
| overt   | Nigeria (Enugu) | 15 | 2 | 4 | 14 |
| overt   | Nigeria (Enugu) | 15 | 2 | 4 | 27 |
| overt   | Nigeria (Enugu) | 17 | 1 | 3 | 3  |
| overt   | Nigeria (Enugu) | 3  | 1 | 3 | 10 |
| overt   | Nigeria (Enugu) | 3  | 1 | 3 | 26 |
| overt   | Nigeria (Enugu) | 3  | 1 | 3 | 34 |
| overt   | Nigeria (Enugu) | 3  | 2 | 5 | 12 |
| mystery | Nigeria (Enugu) | 4  | 1 | 2 | 13 |
| overt   | Nigeria (Enugu) | 4  | 2 | 1 | 10 |
| overt   | Nigeria (Enugu) | 4  | 2 | 3 | 8  |
| overt   | Nigeria (Enugu) | 4  | 2 | 3 | 16 |
| overt   | Nigeria (Enugu) | 4  | 2 | 3 | 38 |
| overt   | Nigeria (Enugu) | 9  | 1 | 1 | 6  |
| overt   | Nigeria (Enugu) | 9  | 1 | 1 | 16 |
| overt   | Nigeria (Enugu) | 12 | 2 | 1 | 15 |
| overt   | Nigeria (Enugu) | 12 | 2 | 6 | 1  |
| overt   | Nigeria (Enugu) | 15 | 2 | 4 | 14 |
| overt   | Nigeria (Enugu) | 15 | 2 | 4 | 7  |
| overt   | Nigeria (Enugu) | 15 | 2 | 4 | 8  |
| overt   | Nigeria (Enugu) | 15 | 2 | 4 | 11 |
| overt   | Nigeria (Enugu) | 15 | 2 | 4 | 27 |
| overt   | Nigeria (Enugu) | 15 | 2 | 4 | 44 |
| overt   | Nigeria (Enugu) | 16 | 3 | 1 | 83 |
| overt   | Nigeria (Enugu) | 3  | 1 | 3 | 10 |
| overt   | Nigeria (Enugu) | 3  | 1 | 3 | 11 |
| overt   | Nigeria (Enugu) | 3  | 2 | 5 | 12 |
| overt   | Nigeria (Enugu) | 12 | 2 | 6 | 1  |



|   |   |            |    |
|---|---|------------|----|
| 1 | X | Artemether | 20 |
| 1 | X | Artemether | 20 |
| 2 | X | Artemether | 20 |
| 2 | X | Artemether | 20 |
| 1 | X | Artemether | 20 |
| 2 | X | Artemether | 20 |
| 2 | X | Artemether | 20 |
| 2 | X | Artemether | 20 |
| 2 | X | Artemether | 20 |
| 1 | X | Artemether | 20 |
| 2 | X | Artemether | 20 |
| 1 | X | Artemether | 20 |
| 1 | X | Artemether | 40 |
| 1 | X | Artemether | 40 |
| 2 | X | Artemether | 40 |
| 1 | X | Artemether | 40 |
| 1 | X | Artemether | 40 |
| 2 | X | Artemether | 40 |
| 2 | X | Artemether | 40 |
| 1 | X | Artemether | 80 |
| 1 | X | Artemether | 80 |
| 2 | X | Artemether | 80 |
| 2 | X | Artemether | 80 |
| 2 | X | Artemether | 80 |
| 1 | X | Artemether | 80 |
| 2 | X | Artemether | 80 |
| 1 | X | Artemether | 80 |
| 1 | X | Artemether | 80 |
| 1 | X | Artemether | 80 |
| 2 | X | Artemether | 80 |
| 2 | X | Artemether | 80 |
| 2 | X | Artemether | 80 |
| 1 | X | Artemether | 80 |
| 1 | X | Artemether | 80 |
| 1 | X | Artemether | 80 |
| 2 | X | Artemether | 80 |
| 2 | X | Artemether | 80 |
| 2 | X | Artemether | 80 |
| 2 | X | Artemether | 80 |
| 2 | X | Artemether | 80 |
| 2 | X | Artemether | 80 |
| 1 | X | Artemether | 80 |

|   |   |            |     |      |
|---|---|------------|-----|------|
| 2 | X | Artemether | 80  |      |
| 2 | X | Artemether | 80  |      |
| 2 | X | Artemether | 80  |      |
| 2 | X | Artemether | 80  |      |
| 1 | X | Artemether | 80  |      |
| 4 | X | Artemether | 80  |      |
| 1 | X | Artemether | 80  |      |
| 1 | X | Artemether | 80  |      |
| 2 | X | Artemether | 80  |      |
| 2 | X | Artemether | 80  |      |
| 1 | X | Artemether | 80  |      |
| 1 | X | Artemether | 80  |      |
| 1 | X | Artemether | 80  |      |
| 2 | X | Artemether | 80  |      |
| 2 | X | Artemether | 80  |      |
| 2 | X | Artemether | 80  |      |
| 1 | X | Artemether | 80  |      |
| 4 | X | Artemether | 80  |      |
| 1 | X | Artemether | 80  |      |
| 1 | X | Artemether | 80  |      |
| 2 | X | Artemether | 80  |      |
| 2 | X | Artemether | 80  |      |
| 1 | X | Artemether | 80  |      |
| 1 | X | Artemether | 80  |      |
| 2 | X | Artemether | 80  |      |
| 2 | X | Artemether | 80  |      |
| 2 | X | Artemether | 80  |      |
| 2 | X | Artemether | 80  |      |
| 2 | X | Artemether | 80  |      |
| 2 | X | Artemether | 80  | 20/5 |
| 2 | X | Artemether | 80  | 20/5 |
| 2 | X | Artemether | 80  | 20/5 |
| 1 | X | Artemether | 80  | 20/5 |
| 1 | X | Artesunate | 50  |      |
| 2 | X | Artesunate | 50  |      |
| 2 | X | Artesunate | 50  |      |
| 2 | X | Artesunate | 50  |      |
| 2 | X | Artesunate | 50  |      |
| 2 | X | Artesunate | 50  |      |
| 2 | X | Artesunate | 50  |      |
| 2 | X | Artesunate | 50  |      |
| 2 | X | Artesunate | 50  |      |
| 2 | X | Artesunate | 50  |      |
| 1 | X | Artesunate | 100 |      |
| 2 | X | Artesunate | 100 |      |
| 3 | X | Artesunate | 100 |      |
| 4 | X | Artesunate | 100 |      |
| 1 | X | Artesunate | 100 |      |
| 1 | X | Artesunate | 100 |      |

|   |   |                    |     |
|---|---|--------------------|-----|
| 2 | X | Artesunate         | 100 |
| 2 | X | Artesunate         | 100 |
| 1 | X | Artesunate         | 100 |
| 2 | X | Artesunate         | 100 |
| 1 | X | Artesunate         | 100 |
| 3 | X | Artesunate         | 100 |
| 2 | X | Artesunate         | 100 |
| 1 | X | Artesunate         | 100 |
| 2 | X | Artesunate         | 100 |
| 2 | X | Artesunate         | 100 |
| 2 | X | Artesunate         | 100 |
| 1 | X | Artesunate         | 200 |
| 2 | X | Artesunate         | 200 |
| 2 | X | Artesunate         | 200 |
| 1 | X | Artesunate         | 200 |
| 2 | X | Artesunate         | 200 |
| 2 | X | Artesunate         | 200 |
| 2 | X | Artesunate         | 200 |
| 2 | X | Artesunate         | 200 |
| 2 | X | Artesunate         | 200 |
| 1 | X | Artesunate         | 200 |
| 3 | X | Artesunate         | 200 |
| 1 | X | Artesunate         | 200 |
| 1 | X | Artesunate         | 200 |
| 1 | X | Artesunate         | 200 |
| 2 | X | Artesunate         | 200 |
| 1 | X | Artesunate         | 200 |
| 1 | X | Artesunate         | 200 |
| 2 | X | Artesunate         | 200 |
| 2 | X | Artesunate         | 200 |
| 3 | X | Artesunate         | 200 |
| 1 | X | Dihydroartemisinin | 30  |
| 1 | X | Dihydroartemisinin | 30  |
| 2 | X | Dihydroartemisinin | 30  |
| 2 | X | Dihydroartemisinin | 30  |
| 2 | X | Dihydroartemisinin | 30  |
| 2 | X | Dihydroartemisinin | 30  |
| 2 | X | Dihydroartemisinin | 30  |
| 2 | X | Dihydroartemisinin | 30  |
| 2 | X | Dihydroartemisinin | 30  |
| 2 | X | Dihydroartemisinin | 30  |
| 2 | X | Dihydroartemisinin | 30  |
| 2 | X | Dihydroartemisinin | 30  |
| 2 | X | Dihydroartemisinin | 30  |
| 2 | X | Dihydroartemisinin | 30  |
| 1 | X | Dihydroartemisinin | 30  |
| 4 | X | Dihydroartemisinin | 30  |
| 1 | X | Dihydroartemisinin | 40  |
| 1 | X | Dihydroartemisinin | 40  |
| 2 | X | Dihydroartemisinin | 40  |

|   |   |                    |    |
|---|---|--------------------|----|
| 2 | X | Dihydroartemisinin | 40 |
| 2 | X | Dihydroartemisinin | 40 |
| 1 | X | Dihydroartemisinin | 40 |
| 2 | X | Dihydroartemisinin | 40 |
| 2 | X | Dihydroartemisinin | 40 |
| 1 | X | Dihydroartemisinin | 60 |
| 2 | X | Dihydroartemisinin | 60 |

---

| productid | outlet_type    | samplecode       | brandname | otherbname | dateofpurchase |
|-----------|----------------|------------------|-----------|------------|----------------|
| 57-67     | PMV            | 1-3-1-57-57-67   | x         |            | 15-Dec-12      |
| 17-67b    | Pharmacy       | 5-1-2-17-17-67b  | x         |            | 18-Dec-12      |
| 34-67a    | PMV            | 15-2-3-34-34-67a | x         |            | 08-Dec-12      |
| 4-46      | Pharmacy       | 1-3-1-4-04-46    | x         |            | 10-Dec-12      |
| 21-46A    | PMV            | 1-3-1-21-21-46A  | x         |            | 13-Dec-12      |
| 80-46     | PMV            | 1-3-1-80-80-46   | x         |            | 18-Dec-12      |
| 7-46      | PMV            | 2-3-5-7-7-46     | x         |            | 12-Dec-12      |
| 29-46     | PMV            | 2-3-5-29-29-46   | x         |            | 11-Dec-12      |
| 2-26      | Pharmacy       | 3-2-1-2-02-26    | x         |            | 10-Dec-12      |
| 42-46     | PMV            | 3-2-4-42-42-46   | x         |            | 13-Dec-12      |
| 12-46     | Pharmacy       | 4-1-2-12-12-46   | x         |            | 14-Dec-12      |
| 0-46      | Publichealth f | 5-1-2-0-0-46     | x         |            | 21-Dec-12      |
| 21-46     | Pharmacy       | 5-1-2-21-21-46   | x         |            | 14-Dec-12      |
| 30-46     | PMV            | 5-1-2-30-30-46   | x         |            | 10-Dec-12      |
| 31-46     | PMV            | 5-1-2-31-31-46   | x         |            | 12-Dec-12      |
| 46-46     | PMV            | 5-1-2-46-46-46   | x         |            | 14-Dec-12      |
| 49-496    | PMV            | 5-1-2-49-49-496  | x         |            | 14-Dec-12      |
| 0-40      | Publichealth f | 5-2-1-0-0-40     | x         |            | 20-Dec-12      |
| 26-46     | PMV            | 6-2-1-26-26-46   | x         |            | 14-Dec-12      |
| 28-46     | Pharmacy       | 6-2-1-28-28-46   | x         |            | 14-Dec-12      |
| 28-67A    | Pharmacy       | 6-2-1-28-28-67A  | x         |            | 14-Dec-12      |
| 6-46      | Pharmacy       | 6-2-3-6-06-46    | x         |            | 11-Dec-12      |
| 39-67     | PMV            | 6-2-3-39-39-67   | x         |            | 13-Dec-12      |
| 20-44     | PMV            | 7-2-4-20-20-44   | x         |            | 10-Dec-12      |
| 0-46      | Publichealth f | 7-3-5-0-0-46     | x         |            | 20-Dec-12      |
| 0-46b     | Publichealth f | 8-2-1-0-00-46b   | x         |            | 20-Dec-12      |
| 44-46     | PMV            | 8-2-4-44-44-46   | x         |            | 12-Dec-12      |
| 0-46A     | Publichealth f | 9-2-1-0-0-46A    | x         |            | 21-Dec-12      |
| 10-46     | PMV            | 9-2-2-10-10-46   | x         |            | 18-Dec-12      |
| 18-44     | PMV            | 10-3-1-18-18-44  | x         |            | 14-Dec-12      |
| 31-46     | PMV            | 10-3-1-31-31-46  | x         |            | 14-Dec-12      |
| 53-46     | PMV            | 10-3-1-53-53-46  | x         |            | 18-Dec-12      |
| 65-46a    | PMV            | 10-3-1-65-65-46a | x         |            | 14-Dec-12      |
| 2-46      | Pharmacy       | 11-2-5-2-02-46   | x         |            | 12-Dec-12      |
| 24-44     | PMV            | 12-2-5-24-24-44  | x         |            | 10-Dec-12      |
| 18-46     | PMV            | 12-3-7-18-18-46  | x         |            | 11-Dec-12      |
| 0-46      | Publichealth f | 13-2-1-0-0-46    | x         |            | 21-Dec-12      |
| 7-44      | Pharmacy       | 14-1-1-7-07-44   | x         |            | 14-Dec-12      |
| 7-46      | Pharmacy       | 14-1-1-7-07-46   | x         |            | 14-Dec-12      |

|        |                  |                 |   |           |
|--------|------------------|-----------------|---|-----------|
| 18-44  | PMV              | 14-1-1-18-18-44 | x | 14-Dec-12 |
| 5-45   | Pharmacy         | 14-1-3-5-05-45  | x | 11-Dec-12 |
| 10-46  | Pharmacy         | 14-1-3-10-10-46 | x | 13-Dec-12 |
| 23-44  | Pharmacy         | 14-1-3-23-23-44 | x | 12-Dec-12 |
| 0-46   | Publichealth fca | 15-2-1-0-0-46   | x | 20-Dec-12 |
| 7-45   | Pharmacy         | 16-1-1-7-07-45  | x | 14-Dec-12 |
| 0-46a  | Publichealth fca | 16-2-3-0-0-46a  | x | 10-Dec-12 |
| 21-46B | PMV              | 1-3-1-21-21-46B | x | 13-Dec-12 |
| 28-44  | PMV              | 2-3-5-28-28-44  | x | 11-Dec-12 |
| 29-44  | PMV              | 2-3-5-29-29-44  | x | 11-Dec-12 |
| 0-46   | Publichealth fca | 3-3-71-0-0-46   | x | 20-Dec-12 |
| 5-44   | Pharmacy         | 4-1-2-5-5-44    | x | 13-Dec-12 |
| 9-46   | Pharmacy         | 4-1-2-9-09-46   | x | 11-Dec-12 |
| 0-46a  | Publichealth fca | 8-2-1-0-00-46a  | x | 20-Dec-12 |
| 0-46B  | Publichealth fca | 9-2-1-0-0-46B   | x | 21-Dec-12 |
| 25-44  | PMV              | 10-3-1-25-25-44 | x | 15-Dec-12 |
| 31-45  | PMV              | 10-3-1-31-31-45 | x | 14-Dec-12 |
| 65-44  | PMV              | 10-3-1-65-65-44 | x | 14-Dec-12 |
| 26-46  | PMV              | 11-2-5-26-26-46 | x | 10-Dec-12 |
| 24-46  | PMV              | 12-2-5-24-24-46 | x | 10-Dec-12 |
| 0-46   | Publichealth fca | 13-2-1-0-0-46   | x | 21-Dec-12 |
| 0-67   | Publichealth fca | 15-2-1-0-0-67   | x | 20-Dec-12 |
| 0-46B  | Publichealth fca | 16-2-3-0-0-46B  | x | 10-Dec-12 |
| 0-00A  | Publichealth fca | 00-0-0-0-0-00A  | x | no date   |
| 4-45   | Pharmacy         | 1-3-1-4-04-45   | x | 10-Dec-12 |
| 57-44a | PMV              | 1-3-1-57-57-44a | x | 15-Dec-12 |
| 5-44   | PMV              | 2-3-2-5-05-44   | x | 10-Dec-12 |
| 7-44   | PMV              | 2-3-2-7-07-44   | x | 10-Dec-12 |
| 7-45   | PMV              | 2-3-2-7-07-45   | x | 10-Dec-12 |
| 8-45   | PMV              | 2-3-2-8-08-45   | x | 10-Dec-12 |
| 7-45   | PMV              | 2-3-5-7-7-45    | x | 12-Dec-12 |
| 34-44  | PMV              | 2-3-5-34-34-44  | x | 12-Dec-12 |
| 42-45  | PMV              | 3-2-4-42-42-45  | x | 13-Dec-12 |
| 38-46  | PMV              | 4-1-2-38-38-46  | x | 14-Dec-12 |
| 0-45   | Publichealth fca | 5-1-2-0-0-45    | x | 21-Dec-12 |
| 2-45   | Pharmacy         | 5-1-2-2-02-45   | x | 10-Dec-12 |
| 21-45  | PMV              | 5-1-2-21-21-45  | x | 14-Dec-12 |
| 22-45  | PMV              | 5-1-2-22-22-45  | x | 04-Dec-12 |
| 0-45   | Publichealth fca | 5-2-1-0-0-45    | x | 20-Dec-12 |
| 28-45  | Pharmacy         | 6-2-1-28-28-45  | x | 14-Dec-12 |
| 1-46   | Pharmacy         | 6-2-3-1-01-46   | x | 12-Dec-12 |
| 14-45  | Pharmacy         | 6-2-3-14-14-45  | x | 10-Dec-12 |
| 39-46  | PMV              | 6-2-3-39-39-46  | x | 13-Dec-12 |
| 20-45  | Pharmacy         | 7-2-4-20-20-45  | x | 10-Dec-12 |
| 22-45  | Pharmacy         | 7-2-4-22-22-45  | x | 13-Dec-12 |
| 36-46  | PMV              | 7-2-4-36-36-46  | x | 13-Dec-12 |
| 0-46   | Publichealth fca | 7-3-5-0-0-46    | x | 20-Dec-12 |
| 0-45   | Publichealth fca | 8-2-1-0-00-45   | x | 20-Dec-12 |
| 0-45   | Publichealth fca | 9-2-1-0-0-45    | x | 21-Dec-12 |
| 10-45  | PMV              | 9-2-2-10-10-45  | x | 18-Dec-12 |

|        |                |                 |   |           |
|--------|----------------|-----------------|---|-----------|
| 11-45  | Pharmacy       | 9-2-5-11-11-45  | x | 20-Dec-12 |
| 3-46   | PMV            | 9-3-3-3-03-46   | x | 13-Dec-12 |
| 18-45  | PMV            | 10-3-1-18-18-45 | x | 14-Dec-12 |
| 21-45  | PMV            | 10-3-1-21-21-45 | x | 13-Dec-12 |
| 31-44  | PMV            | 10-3-1-31-31-44 | x | 14-Dec-12 |
| 33-45  | PMV            | 10-3-1-33-33-45 | x | 15-Dec-12 |
| 65-45  | PMV            | 10-3-1-65-65-45 | x | 14-Dec-12 |
| 0-45   | Publichealth f | 13-2-1-0-0-45   | x | 21-Dec-12 |
| 5-45   | PMV            | 14-1-1-5-05-45  | x | 14-Dec-12 |
| 6-14   | PMV            | 14-1-1-6-6-14   | x | 14-Dec-12 |
| 16-45  | PMV            | 14-1-1-16-16-45 | x | 13-Dec-12 |
| 0-45   | Publichealth f | 15-2-1-0-0-45   | x | 20-Dec-12 |
| 7-44   | PMV            | 16-1-1-7-07-44  | x | 14-Dec-12 |
| 30-44  | PMV            | 16-1-3-30-30-44 | x | 18-Dec-12 |
| 0-45A  | Publichealth f | 16-2-3-0-0-45A  | x | 10-Dec-12 |
| 10-44  | Pharmacy       | 1-3-1-10-10-044 | x | 14-Dec-12 |
| 33-44  | PMV            | 1-3-1-33-33-44  | x | 15-Dec-12 |
| 42-44  | PMV            | 1-3-1-42-42-44  | x | 13-Dec-12 |
| 57-44b | PMV            | 1-3-1-57-57-44b | x | 15-Dec-12 |
| 60-44  | PMV            | 1-3-1-60-60-44  | x | 13-Dec-12 |
| 63-44  | PMV            | 1-3-1-63-63-44  | x | 13-Dec-12 |
| 69-44  | PMV            | 1-3-1-69-69-44  | x | 14-Dec-12 |
| 76-44  | PMV            | 1-3-1-76-76-44  | x | 18-Dec-12 |
| 5-67A  | PMV            | 2-3-2-5-05-67A  | x | 10-Dec-12 |
| 6-44   | PMV            | 2-3-2-6-06-44   | x | 10-Dec-12 |
| 33-46  | Pharmacy       | 2-3-5-33-33-46  | x | 12-Dec-12 |
| 7-44   | Pharmacy       | 3-2-4-7-07-44   | x | 11-Dec-12 |
|        | 13 PMV         | 3-2-4-13-13     | x | 13-Dec-12 |
| 14-44  | PMV            | 3-2-4-14-14-44  | x | 12-Dec-12 |
| 15-44  | PMV            | 3-2-4-15-15-44  | x | 11-Dec-12 |
| 39-44  | PMV            | 3-2-4-39-39-44  | x | 12-Dec-12 |
| 42-44  | PMV            | 3-2-4-42-42-44  | x | 13-Dec-12 |
| 43-44  | PMV            | 3-2-4-43-43-44  | x | 13-Dec-12 |
| 23-44  | Pharmacy       | 4-1-2-23-23-44  | x | 10-Dec-12 |
| 22-44  | Pharmacy       | 5-1-2-22-22-44  | x | 04-Dec-12 |
| 55-44  | PMV            | 5-1-2-55-55-44  | x | 13-Dec-12 |
| 56-44  | PMV            | 5-1-2-56-56-44  | x | 13-Dec-12 |
| 0-44   | Publichealth f | 5-2-1-0-0-44    | x | 20-Dec-12 |
| 26-44  | PMV            | 6-2-1-26-26-44  | x | 14-Dec-12 |
| 28-44  | PMV            | 6-2-1-28-28-44  | x | 14-Dec-12 |
| 37-44  | Pharmacy       | 6-2-3-37-37-44  | x | 12-Dec-12 |
| 6-45   | Pharmacy       | 7-2-4-6-06-45   | x | 11-Dec-12 |
| 27-44  | PMV            | 7-2-4-27-27-44  | x | 12-Dec-12 |
| 36-44  | PMV            | 7-2-4-36-36-44  | x | 13-Dec-12 |
| 0-44   | Publichealth f | 7-3-5-0-0-44    | x | 20-Dec-12 |
| 0-44   | Publichealth f | 8-2-1-0-0-44    | x | 20-Dec-12 |
| 16-44  | PMV            | 8-2-4-16-16-44  | x | 13-Dec-12 |
| 34-45  | PMV            | 8-2-4-34-34-45  | x | 11-Dec-12 |
| 0-44   | Publichealth f | 9-2-1-0-0-44    | x | 21-Dec-12 |
| 76-44  | PMV            | 9-2-2-2-76-44   | x | 18-Dec-12 |



|        |                |                  |   |           |
|--------|----------------|------------------|---|-----------|
| 8-67   | PMV            | 9-3-5-8-8-67     | x | 11-Dec-12 |
| 14-45  | Pharmacy       | 10-3-1-14-14-45  | x | 18-Dec-12 |
| 18-46  | PMV            | 10-3-1-18-18-46  | x | 14-Dec-12 |
| 65-46b | PMV            | 10-3-1-65-65-46b | x | 14-Dec-12 |
| 67-46  | PMV            | 10-3-1-67-67-46  | x | 14-Dec-12 |
| 22-45  | PMV            | 11-2-5-22-22-45  | x | 10-Dec-12 |
| 15-45  | PMV            | 11-3-7-15-15-45  | x | 11-Dec-12 |
| 24-45  | PMV            | 12-2-5-24-24-45  | x | 10-Dec-12 |
| 18-45  | PMV            | 12-3-7-18-18-45  | x | 11-Dec-12 |
| 0-44   | Publichealth f | 13-2-1-0-0-44    | x | 21-Dec-12 |
| 16-46  | Pharmacy       | 13-2-3-16-16-46  | x | 08-Dec-12 |
| 1-45   | Pharmacy       | 13-3-7-1-01-45   | x | 11-Dec-12 |
| 25-44  | PMV            | 14-1-3-25-25-44  | x | 14-Dec-12 |
| 0-44   | Publichealth f | 15-2-1-0-0-44    | x | 20-Dec-12 |
| 20-44  | PMV            | 15-2-3-20-20-44  | x | 12-Dec-12 |
| 26-44  | PMV            | 15-2-3-26-26-44  | x | 08-Dec-12 |
| 11-44  | Pharmacy       | 16-1-3-11-11-44  | x | 10-Dec-12 |
| 0-44   | Publichealth f | 16-2-3-0-0-44    | x | 10-Dec-12 |
| 12-3   | Pharmacy       | 1-3-1-12-12-3    | x | 13-Dec-12 |
| 2-3    | Pharmacy       | 3-2-4-2-02-03    | x | 10-Dec-12 |
| 8-3    | Pharmacy       | 3-2-4-8-08-03    | x | 11-Dec-12 |
| 15-3   | PMV            | 3-2-4-15-15-03   | x | 11-Dec-12 |
| 9-3    | Pharmacy       | 4-1-2-9-9-3      | x | 11-Dec-12 |
| 23-3   | Pharmacy       | 4-1-2-23-23-03   | x | 10-Dec-12 |
| 36-3   | PMV            | 4-1-2-36-36-03   | x | 12-Dec-12 |
| 12-3   | Pharmacy       | 5-2-3-12-12-03   | x | 08-Dec-12 |
| 6-3    | Pharmacy       | 7-2-4-6-06-03    | x | 11-Dec-12 |
| 36-3   | PMV            | 7-2-4-36-36-3    | x | 13-Dec-12 |
| 2-3    | PMV            | 9-2-2-2-02-03    | x | 18-Dec-12 |
| 32-4   | PMV            | 14-1-3-32-32-04  | x | 14-Dec-12 |
| 4-3    | Pharmacy       | 15-2-1-4-04-03   | x | 12-Dec-12 |
| 14-3   | PMV            | 15-2-1-14-14-03  | x | 17-Dec-12 |
| 10-3   | Pharmacy       | 15-2-3-10-10-3   | x | no date   |
| 4-5    | Pharmacy       | 1-3-1-4-04-05    | x | 10-Dec-12 |
| 33-5   | PMV            | 2-3-5-33-33-05   | x | 12-Dec-12 |
| 1-5    | Pharmacy       | 4-1-2-1-01-05    | x | 10-Dec-12 |
| 8-5    | Pharmacy       | 5-1-2-8-08-05    | x | 11-Dec-12 |
| 11-5   | Pharmacy       | 6-2-1-11-11-05   | x | 18-Dec-12 |
| 36-05C | PMV            | 6-2-3-36-36-05C  | x | 08-Dec-12 |
| 6-5    | Pharmacy       | 7-2-4-6-06-05    | x | 11-Dec-12 |
| 27-5   | PMV            | 7-2-4-27-27-05   | x | 12-Dec-12 |
| 22-5   | PMV            | 11-2-5-22-22-5   | x | 10-Dec-12 |
| 9-5    | Pharmacy       | 13-2-5-9-09-05   | x | 10-Dec-12 |
| 38-5   | Pharmacy       | 15-2-3-38-38-05  | x | 13-Dec-12 |
| 2-67   | Pharmacy       | 5-1-2-2-02-67    | x | 10-Dec-12 |
| 75-11  | PMV            | 1-3-1-75-75-11   | x | 15-Dec-12 |
| 33-67A | PMV            | 2-3-5-33-33-67A  | x | 12-Dec-12 |
| 3-11   | Pharmacy       | 4-2-3-3-03-11    | x | 08-Dec-12 |
| 8-11   | Pharmacy       | 5-1-2-8-08-11    | x | 11-Dec-12 |
| 10-11  | Pharmacy       | 5-1-2-10-10-11   | x | 14-Dec-12 |

|        |          |                  |   |           |
|--------|----------|------------------|---|-----------|
| 59-11  | Pharmacy | 5-1-2-59-59-11   | x | 13-Dec-12 |
| 11-11  | PMV      | 9-2-2-11-11-11   | x | 18-Dec-12 |
| 8-11   | Pharmacy | 10-3-1-8-08-11   | x | 18-Dec-12 |
| 1-67   | Pharmacy | 11-2-5-1-01-67   | x | 13-Dec-12 |
| 2-11   | Pharmacy | 11-2-5-2-02-11   | x | 12-Dec-12 |
| 2-11   | Pharmacy | 16-1-3-2-02-11   | x | 11-Dec-12 |
| 26-11  | Pharmacy | 16-1-3-26-26-11  | x | 12-Dec-12 |
| 74-67b | PMV      | 1-3-1-74-74-67b  | x | 14-Dec-12 |
| 2-18   | Pharmacy | 3-2-1-2-02-18    | x | 10-Dec-12 |
| 3-18   | Pharmacy | 4-2-3-3-03-18    | x | 08-Dec-12 |
| 1-18   | Pharmacy | 6-2-1-1-01-18    | x | 14-Dec-12 |
| 11-18  | Pharmacy | 6-2-1-11-11-18   | x | 18-Dec-12 |
| 6-18   | Pharmacy | 6-2-3-6-06-18    | x | 11-Dec-12 |
| 6-18   | Pharmacy | 7-2-4-6-06-18    | x | 11-Dec-12 |
| 37-18  | PMV      | 10-3-1-37-37-18  | x | 11-Dec-12 |
| 10-18  | Pharmacy | 12-2-5-10-10-18  | x | 12-Dec-12 |
| 16-18  | PMV      | 14-1-1-16-16-18  | x | 13-Dec-12 |
| 4-18   | Pharmacy | 14-1-3-4-4-18    | x | 10-Dec-12 |
| 38-18  | Pharmacy | 15-2-3-38-38-18  | x | 13-Dec-12 |
| 4-23   | Pharmacy | 4-1-2-4-04-23    | x | 12-Dec-12 |
| 3-23   | Pharmacy | 4-2-3-3-03-23    | x | 08-Dec-12 |
| 31-23  | PMV      | 5-1-2-31-31-23   | x | 12-Dec-12 |
| 6-23   | Pharmacy | 11-2-5-6-06-23   | x | 21-Dec-12 |
| 4-23   | Pharmacy | 14-1-3-4-4-23    | x | 10-Dec-12 |
| 12-25  | Pharmacy | 1-3-1-12-12-25   | x | 13-Dec-12 |
| 42-25  | PMV      | 1-3-1-42-42-25   | x | 13-Dec-12 |
| 77-25  | PMV      | 1-3-1-77-77-25   | x | 18-Dec-12 |
| 83-25  | PMV      | 1-3-1-83-83-25   | x | 18-Dec-12 |
| 1-25   | Pharmacy | 2-3-6-1-01-25    | x | 10-Dec-12 |
| 2-25   | PMV      | 3-2-1-2-02-25    | x | 10-Dec-12 |
| 2-25   | Pharmacy | 3-2-4-2-02-25    | x | 10-Dec-12 |
| 6-25A  | PMV      | 3-2-6-6-06-25A   | x | 19-Dec-12 |
| 9-25   | Pharmacy | 4-1-2-9-09-25    | x | 11-Dec-12 |
| 57-25  | PMV      | 5-1-2-57-57-25   | x | 14-Dec-12 |
| 7-25   | Pharmacy | 5-2-3-7-07-25    | x | 08-Dec-12 |
| 1-25   | Pharmacy | 6-2-1-1-01-25    | x | 14-Dec-12 |
| 11-25  | Pharmacy | 6-2-1-11-11-25   | x | 18-Dec-12 |
| 28-25  | Pharmacy | 6-2-1-28-28-25   | x | 14-Dec-12 |
| 9-25   | Pharmacy | 6-2-3-9-09-25    | x | 11-Dec-12 |
| 25-25  | PMV      | 6-2-3-25-25-25   | x | 08-Dec-12 |
| 31-25  | PMV      | 6-2-3-31-31-25   | x | 10-Dec-12 |
| 37-25  | Pharmacy | 6-2-3-37-37-25   | x | 12-Dec-12 |
| 6-25   | Pharmacy | 7-2-4-6-06-25    | x | 11-Dec-12 |
| 8-25   | Pharmacy | 8-2-1-8-08-25    | x | 10-Dec-12 |
| 10-25  | Pharmacy | 8-2-4-10-10-25   | x | 12-Dec-12 |
| 1-25   | Pharmacy | 9-2-2-1-01-25    | x | 18-Dec-12 |
| 8-25   | Pharmacy | 10-3-1-8-08-25   | x | 18-Dec-12 |
| 33-25B | PMV      | 10-3-1-33-33-25B | x | 15-Dec-12 |
| 71-25  | PMV      | 10-3-1-71-71-25  | x | 15-Dec-12 |
| 1-25   | Pharmacy | 11-2-5-1-01-25   | x | 13-Dec-12 |

|        |                |                  |   |           |
|--------|----------------|------------------|---|-----------|
| 11-25  | Pharmacy       | 11-2-5-11-11-25  | x | 12-Dec-12 |
| 22-25  | PMV            | 11-2-5-22-22-25  | x | 10-Dec-12 |
| 26-26  | PMV            | 11-2-5-26-26-26  | x | 10-Dec-12 |
| 16-25  | Pharmacy       | 13-2-3-16-16-25  | x | 08-Dec-12 |
| 33-25  | PMV            | 13-3-7-33-33-25  | x | 14-Dec-12 |
| 1-25   | Pharmacy       | 14-1-3-1-01-25   | x | 11-Dec-12 |
| 5-25   | Pharmacy       | 14-1-3-5-05-25   | x | 11-Dec-12 |
| 35-23  | PMV            | 14-1-3-35-35-23  | x | 14-Dec-12 |
| 7-25   | Pharmacy       | 15-2-1-7-07-25   | x | 14-Dec-12 |
| 10-25  | Pharmacy       | 15-2-3-10-10-25  | x | 11-Dec-12 |
| 11-25  | Pharmacy       | 15-2-3-11-11-25  | x | 12-Dec-12 |
| 24-25  | PMV            | 15-2-3-24-24-25  | x | 11-Dec-12 |
| 38-25  | Pharmacy       | 15-2-3-38-38-25  | x | 13-Dec-12 |
| 38-25  | PMV            | 16-1-3-38-38-25  | x | 14-Dec-12 |
| 21-27  | PMV            | 3-2-4-21-21-27   | x | 10-Dec-12 |
| 4-27   | Pharmacy       | 4-1-2-4-04-27    | x | 12-Dec-12 |
| 12-27  | Pharmacy       | 4-1-2-12-12-27   | x | 14-Dec-12 |
| 13-26A | PMV            | 6-2-1-13-13-26A  | x | 13-Dec-12 |
| 5-27   | Pharmacy       | 8-2-4-5-05-27    | x | 11-Dec-12 |
| 31-26A | PMV            | 9-3-5-31-31-26A  | x | 12-Dec-12 |
| 67-26  | PMV            | 10-3-1-67-67-26  | x | 14-Dec-12 |
| 1-27B  | Pharmacy       | 10-3-1-1-01-27B  | x | 14-Dec-12 |
| 1-26   | Pharmacy       | 11-2-5-1-01-26   | x | 13-Dec-12 |
| 15-26  | PMV            | 14-1-1-15-15-26  | x | 13-Dec-12 |
| 24-27  | PMV            | 15-2-3-24-24-27  | x | 11-Dec-12 |
| 38-67B | PMV            | 15-2-3-38-38-67B | x | 13-Dec-12 |
| 36-25  | PMV            | 1-3-1-36-36-25   | x | 15-Dec-12 |
| 4-26   | Pharmacy       | 1-3-1-4-04-26    | x | 10-Dec-12 |
| 57-26  | PMV            | 1-3-1-57-57-26   | x | 15-Dec-12 |
| 59-26  | PMV            | 1-3-1-59-59-26   | x | 11-Dec-12 |
| 60-26  | PMV            | 1-3-1-60-60-26   | x | 13-Dec-12 |
| 69-26  | PMV            | 1-3-1-69-69-26   | x | 14-Dec-12 |
| 81-26  | PMV            | 1-3-1-81-81-26   | x | 18-Dec-12 |
| 3-26   | PMV            | 2-3-4-3-3-26     | x | 10-Dec-12 |
| 25-26  | PMV            | 2-3-5-25-25-26   | x | 11-Dec-12 |
| 15-26  | PMV            | 3-2-4-15-15-26   | x | 11-Dec-12 |
| 18-26  | PMV            | 3-2-4-18-18-26   | x | 13-Dec-12 |
| 2-26   | PMV            | 3-2-4-2-02-26    | x | 10-Dec-12 |
| 7-26   | Pharmacy       | 3-2-4-7-07-26    | x | 11-Dec-12 |
| 6-25B  | PMV            | 3-2-6-6-06-25B   | x | 19-Dec-12 |
| 0-26   | Publichealth f | 3-3-7-0-0-26     | x | 20-Dec-12 |
| 23-26  | Pharmacy       | 4-1-2-23-23-26   | x | 10-Dec-12 |
| 35-26  | PMV            | 4-1-2-35-35-26   | x | 13-Dec-12 |
| 36-26  | PMV            | 4-1-2-36-36-26   | x | 12-Dec-12 |
| 53-26  | PMV            | 4-1-2-53-53-26   | x | 18-Dec-12 |
| 5-26   | Pharmacy       | 4-1-2-5-5-26     | x | 13-Dec-12 |
| 33-26  | PMV            | 5-1-2-33-33-26   | x | 12-Dec-12 |
| 37-25  | PMV            | 5-1-2-37-37-25   | x | 13-Dec-12 |
| 55-26  | PMV            | 5-1-2-55-55-26   | x | 13-Dec-12 |
| 57-26  | PMV            | 5-1-2-57-57-26   | x | 13-Dec-12 |

|        |                |                 |   |               |           |
|--------|----------------|-----------------|---|---------------|-----------|
| 59-7   | PMV            | 5-1-2-59-59-07  | x |               | 20-Dec-12 |
| 13-26B | PMV            | 6-2-1-13-13-26B | x |               | 13-Dec-12 |
| 15-26  | PMV            | 6-2-1-15-15-26  | x |               | 17-Dec-12 |
| 26-26  | PMV            | 6-2-1-26-26-26  | x |               | 14-Dec-12 |
| 1-26   | Pharmacy       | 6-2-3-1-01-26   | x |               | 12-Dec-12 |
| 39-26  | PMV            | 6-2-3-39-39-26  | x |               | 13-Dec-12 |
| 1-26A  | Pharmacy       | 7-2-4-1-01-26A  | x |               | 13-Dec-12 |
| 1-26B  | Pharmacy       | 7-2-4-1-01-26B  | x |               | 13-Dec-12 |
| 22-26  | PMV            | 7-2-4-22-22-26  | x |               | 10-Dec-12 |
| 16-26  | PMV            | 8-2-4-16-16-26  | x |               | 13-Dec-12 |
| 23-26  | PMV            | 8-2-4-23-23-26  | x |               | 10-Dec-12 |
| 34-26  | PMV            | 8-2-4-34-34-26  | x |               | 11-Dec-12 |
| 5-26   | Pharmacy       | 8-2-4-5-05-26   | x |               | 11-Dec-12 |
| 11-25  | PMV            | 9-2-2-11-11-25  | x |               | 18-Dec-12 |
| 5-26   | PMV            | 2-3-2-5-05-26   | x |               | 10-Dec-12 |
| 20-25  | PMV            | 9-3-5-20-20-25  | x |               | 11-Dec-12 |
| 31-25  | PMV            | 9-3-5-31-31-25  | x |               | 12-Dec-12 |
| 8-25   | PMV            | 9-3-6-8-08-25   | x |               | 13-Dec-12 |
| 21-26  | PMV            | 1-3-1-21-21-26  | x |               | 13-Dec-12 |
| 1-26   | Pharmacy       | 10-3-1-1-01-26  | x |               | 14-Dec-12 |
| 8-26   | Pharmacy       | 10-3-1-8-8-26   | x |               | 18-Dec-12 |
| 21-62  | PMV            | 11-2-5-21-21-62 | x |               | 10-Dec-12 |
| 10-26  | Pharmacy       | 12-2-5-10-10-26 | x |               | 12-Dec-12 |
| 21-26  | PMV            | 13-2-3-21-21-26 | x |               | 08-Dec-12 |
| 25-26  | PMV            | 13-2-5-25-25-26 | x |               | 10-Dec-12 |
| 9-26   | Pharmacy       | 13-2-5-9-09-26  | x |               | 10-Dec-12 |
| 28-26  | PMV            | 13-3-7-28-28-26 | x |               | 13-Dec-12 |
| 32-26  | PMV            | 13-3-7-32-32-26 | x |               | 14-Dec-12 |
| 20-26  | PMV            | 14-1-1-20-20-26 | x |               | 20-Dec-12 |
| 23-26  | PMV            | 14-1-3-23-23-26 | x |               | 10-Dec-12 |
| 4-25   | Pharmacy       | 14-1-3-4-4-25   | x |               | 12-Dec-12 |
| 5-26   | Pharmacy       | 14-1-3-5-05-26  | x |               | 11-Dec-12 |
| 4-26   | Pharmacy       | 15-2-1-4-04-26  | x |               | 17-Dec-12 |
| 7-26   | Pharmacy       | 15-2-1-7-07-26  | x |               | 14-Dec-12 |
| 10-26  | PMV            | 15-2-3-10-10-26 | x |               | 11-Dec-12 |
| 26-26  | PMV            | 15-2-3-26-26-26 | x |               | 08-Dec-12 |
| 28-26  | PMV            | 16-1-1-28-28-26 | x |               | 14-Dec-12 |
| 11-26  | Pharmacy       | 16-1-3-11-11-26 | x |               | 10-Dec-12 |
| 6-26   | Pharmacy       | 16-1-3-6-06-026 | x |               | 12-Dec-12 |
| 7-26   | Pharmacy       | 16-1-3-7-07-26  | x |               | 11-Dec-12 |
| 27-26  | PMV            | 5-1-2-27-27-26  | x | old packaging | 14-Dec-12 |
| 21-27A | PMV            | 1-3-1-21-21-27A | x |               | 13-Dec-12 |
| 60-27B | PMV            | 1-3-1-60-60-27B | x |               | 11-Dec-12 |
| 75-26  | PMV            | 1-3-1-75-75-26  | x |               | 15-Dec-12 |
| 5-67   | PMV            | 2-3-2-5-5-67    | x |               | 10-Dec-12 |
| 6-27A  | PMV            | 2-3-2-6-06-27A  | x |               | 10-Dec-12 |
| 34-27a | PMV            | 2-3-5-34-34-27a | x |               | 12-Dec-12 |
| 2-27   | Pharmacy       | 3-2-4-2-02-27   | x |               | 10-Dec-12 |
| 0-27a  | Publichealth f | 3-3-7-0-0-27a   | x |               | 20-Dec-12 |
| 21-27  | PMV            | 5-1-2-21-21-27  | x |               | 14-Dec-12 |

|        |                |                  |   |           |
|--------|----------------|------------------|---|-----------|
| 22-27  | PMV            | 5-1-2-22-22-27   | x | 04-Dec-12 |
| 33-27  | PMV            | 5-1-2-33-33-27   | x | 12-Dec-12 |
| 49-27  | PMV            | 5-1-2-49-49-27   | x | 14-Dec-12 |
| 12-27  | Pharmacy       | 5-2-3-12-12-27   | x | 08-Dec-12 |
| 13-27  | PMV            | 6-2-1-13-13-27   | x | 13-Dec-12 |
| 37-67C | Pharmacy       | 6-2-3-37-37-67C  | x | 12-Dec-12 |
| 16-27  | PMV            | 8-2-4-16-16-27   | x | 13-Dec-12 |
| 23-27  | PMV            | 8-2-4-23-23-27   | x | 13-Dec-12 |
| 20-27  | PMV            | 9-3-5-20-20-27   | x | 11-Dec-12 |
| 31-27  | PMV            | 9-3-5-31-31-27   | x | 12-Dec-12 |
| 8-27   | PMV            | 9-3-6-8-08-27    | x | 13-Dec-12 |
| 1-27A  | Pharmacy       | 10-3-1-1-01-27A  | x | 14-Dec-12 |
| 20-17A | PMV            | 10-3-4-20-20-17A | x | 13-Dec-12 |
| 6-77   | Pharmacy       | 12-3-7-6-06-77   | x | 11-Dec-12 |
| 21-27  | PMV            | 13-2-3-21-21-27  | x | 08-Dec-12 |
| 28-25  | PMV            | 13-3-7-28-28-25  | x | 13-Dec-12 |
| 8-27   | Pharmacy       | 13-3-7-8-08-27   | x | 11-Dec-12 |
| 9-27   | Pharmacy       | 13-3-7-9-09-27   | x | 11-Dec-12 |
| 1-25   | Pharmacy       | 14-1-1-1-01-25   | x | 13-Dec-12 |
| 7-25   | Pharmacy       | 14-1-1-7-07-25   | x | 14-Dec-12 |
| 17-67A | PMV            | 15-2-1-17-17-67A | x | 14-Dec-12 |
| 5-67b  | Pharmacy       | 15-2-1-5-05-67b  | x | 14-Dec-12 |
| 26-27  | PMV            | 15-2-3-26-26-27  | x | 08-Dec-12 |
| 38-67a | PMV            | 15-2-3-38-38-67a | x | 13-Dec-12 |
| 17-27  | PMV            | 16-1-1-17-17-27  | x | 14-Dec-12 |
| 2-26   | Pharmacy       | 16-1-3-2-02-26   | x | 11-Dec-12 |
| 31-27  | PMV            | 16-1-3-31-31-27  | x | 18-Dec-12 |
| 12-27  | Pharmacy       | 1-3-1-12-12-27   | x | 13-Dec-12 |
| 21-27B | PMV            | 1-3-1-21-21-27B  | x | 13-Dec-12 |
| 42-27  | PMV            | 1-3-1-42-42-27   | x | 13-Dec-12 |
| 59-67b | PMV            | 1-3-1-59-59-67b  | x | 11-Dec-12 |
| 60-27A | PMV            | 1-3-1-60-60-27A  | x | 11-Dec-12 |
| 5-27   | PMV            | 2-3-2-5-05-27    | x | 10-Dec-12 |
| 6-27B  | PMV            | 2-3-2-6-06-27B   | x | 10-Dec-12 |
| 34-27b | PMV            | 2-3-5-34-34-27b  | x | 12-Dec-12 |
| 2-27   | Pharmacy       | 3-2-1-2-02-27    | x | 10-Dec-12 |
| 6-27   | PMV            | 3-2-6-6-06-27    | x | 19-Dec-12 |
| 0-27b  | Publichealth f | 3-3-7-0-00-27b   | x | 20-Dec-12 |
| 23-27  | PMV            | 4-1-2-23-23-27   | x | 10-Dec-12 |
| 2-25   | Pharmacy       | 5-1-2-2-02-25    | x | 10-Dec-12 |
| 8-27   | Pharmacy       | 5-1-2-8-08-27    | x | 11-Dec-12 |
| 10-27  | Pharmacy       | 5-1-2-10-10-27   | x | 14-Dec-12 |
| 22-27  | PMV            | 7-2-4-22-22-27   | x | 13-Dec-12 |
| 34-27  | PMV            | 8-2-4-34-34-27   | x | 11-Dec-12 |
| 6-27   | PMV            | 9-2-2-6-06-27    | x | 18-Dec-12 |
| 31-26B | PMV            | 9-3-5-31-31-26B  | x | 12-Dec-12 |
| 8-26   | PMV            | 9-3-6-8-08-26    | x | 13-Dec-12 |
| 14-26  | Pharmacy       | 10-3-1-14-14-26  | x | 18-Dec-12 |
| 15-27  | Pharmacy       | 10-3-1-15-15-27  | x | 10-Dec-12 |
| 33-27  | PMV            | 10-3-1-33-33-27  | x | 15-Dec-12 |

|        |                |                  |   |           |
|--------|----------------|------------------|---|-----------|
| 53-26  | PMV            | 10-3-1-53-53-26  | x | 18-Dec-12 |
| 67-27  | PMV            | 10-3-1-67-67-27  | x | 14-Dec-12 |
| 2-27   | PMV            | 11-2-5-2-02-27   | x | 12-Dec-12 |
| 24-27  | PMV            | 12-2-5-24-24-27  | x | 10-Dec-12 |
| 21-25  | PMV            | 13-2-3-21-21-25  | x | 08-Dec-12 |
| 18-25  | PMV            | 13-2-5-18-18-25  | x | 10-Dec-12 |
| 21-26  | PMV            | 14-1-3-21-21-26  | x | 12-Dec-12 |
| 27-27  | PMV            | 16-1-3-27-27-27  | x | 12-Dec-12 |
| 30-27  | PMV            | 16-1-3-30-30-27  | x | 18-Dec-12 |
| 8-67C  | Pharmacy       | 5-1-2-8-08-67C   | x | 11-Dec-12 |
| 5-67A  | Pharmacy       | 14-1-3-5-05-67A  | x | 11-Dec-12 |
| 7-67a  | Pharmacy       | 15-2-1-7-07-67a  | x | 14-Dec-12 |
| 8-67D  | Pharmacy       | 5-1-2-8-08-67D   | x | 11-Dec-12 |
| 7-67   | Pharmacy       | 5-2-3-7-07-67    | x | 08-Dec-12 |
| 1-67a  | Pharmacy       | 6-2-1-1-01-67a   | x | 14-Dec-12 |
| 1-7    | Pharmacy       | 7-2-4-1-01-07    | x | 14-Dec-12 |
| 10-67A | Pharmacy       | 8-2-4-10-10-67A  | x | 12-Dec-12 |
| 1-67A  | Pharmacy       | 11-2-5-1-01-67A  | x | 13-Dec-12 |
| 6-67B  | Pharmacy       | 11-2-5-6-06-67B  | x | 21-Dec-12 |
| 10-67A | Pharmacy       | 12-2-5-10-10-67A | x | 12-Dec-12 |
| 29-67b | PMV            | 15-2-1-29-29-67b | x | 14-Dec-12 |
| 38-67A | PMV            | 15-2-3-38-38-67A | x | 13-Dec-12 |
| 33-31  | PMV            | 5-1-2-33-33-31   | x | 12-Dec-12 |
| 0-31   | Publichealth f | 3-1-2-0-00-31    | x | 21-Dec-12 |
| 30-31  | PMV            | 5-1-2-30-30-31   | x | 10-Dec-12 |
| 14-31  | PMV            | 6-2-3-14-14-31   | x | 10-Dec-12 |
| 7-31   | Pharmacy       | 3-2-4-7-07-31    | x | 11-Dec-12 |
| 18-31  | PMV            | 10-3-1-18-18-31  | x | 14-Dec-12 |
| 21-31  | PMV            | 10-3-1-21-21-31  | x | 13-Dec-12 |
| 7-20   | Pharmacy       | 16-1-1-7-07-20   | x | 14-Dec-12 |
| 57-31  | PMV            | 1-3-1-57-57-31   | x | 15-Dec-12 |
| 2-31   | Pharmacy       | 3-2-1-2-02-31    | x | 10-Dec-12 |
| 12-31  | Pharmacy       | 4-1-2-12-12-31   | x | 14-Dec-12 |
| 8-31   | Pharmacy       | 5-1-2-8-08-31    | x | 11-Dec-12 |
| 6-31   | Pharmacy       | 12-3-7-6-06-31   | x | 11-Dec-12 |
| 25-31  | PMV            | 13-2-5-25-25-31  | x | 10-Dec-12 |
| 28-31  | PMV            | 13-3-7-28-28-31  | x | 13-Dec-12 |
| 16-31  | PMV            | 14-1-1-16-16-31  | x | 13-Dec-12 |
| 27-31A | PMV            | 16-1-3-27-27-31A | x | 12-Dec-12 |
| 24-67a | PMV            | 11-3-7-24-24-67a | x | 11-Dec-12 |
| 28-67  | PMV            | 12-2-5-28-28-67  | x | 10-Dec-12 |
| 22-67b | PMV            | 5-1-2-22-22-67b  | x | 04-Dec-12 |
| 22-67  | PMV            | 7-2-4-22-22-67   | x | 13-Dec-12 |
| 0-48   | Publichealth f | 9-2-1-0-0-48     | x | 21-Dec-12 |
| 6-67A  | PMV            | 6-2-3-6-06-67A   | x | 11-Dec-12 |
| 5-52a  | Pharmacy       | 2-3-2-5-5-52a    | x | 10-Dec-12 |
| 7-52   | Pharmacy       | 3-2-4-7-07-52    | x | 11-Dec-12 |
| 21-52  | PMV            | 3-2-4-21-21-52   | x | 10-Dec-12 |
| 19-52  | Pharmacy       | 4-1-2-19-19-52   | x | 14-Dec-12 |
| 38-52a | PMV            | 4-1-2-38-38-52a  | x | 14-Dec-12 |

|        |          |                  |   |           |
|--------|----------|------------------|---|-----------|
| 8-52   | Pharmacy | 5-1-2-8-08-52    | x | 11-Dec-12 |
| 10-52  | Pharmacy | 5-1-2-10-10-52   | x | 14-Dec-12 |
| 21-67  | PMV      | 5-1-2-21-21-67   | x | 14-Dec-12 |
| 22-52  | PMV      | 5-1-2-22-22-52   | x | 04-Dec-12 |
| 12-67e | PMV      | 5-2-3-12-12-67e  | x | 08-Dec-12 |
| 20-52  | PMV      | 7-2-4-20-20-52   | x | 10-Dec-12 |
| 36-52  | PMV      | 7-2-4-36-36-52   | x | 13-Dec-12 |
| 8-67B  | Pharmacy | 8-2-1-8-08-67B   | x | 10-Dec-12 |
| 6-52   | Pharmacy | 9-2-2-6-06-52    | x | 18-Dec-12 |
| 21-52a | PMV      | 11-2-5-21-21-52a | x | 10-Dec-12 |
| 24-52  | PMV      | 11-3-7-24-24-52  | x | 11-Dec-12 |
| 25-52  | PMV      | 14-1-3-25-25-52  | x | 14-Dec-12 |
| 11-46  | Pharmacy | 15-2-3-11-11-46  | x | 12-Dec-12 |
| 26-67A | PMV      | 15-2-3-26-26-67A | x | 08-Dec-12 |
| 4-52A  | Pharmacy | 1-3-1-4-04-52A   | x | 10-Dec-12 |
| 39-52  | PMV      | 1-3-1-39-39-52   | x | 14-Dec-12 |
| 5-52b  | PMV      | 2-3-2-5-5-52b    | x | 10-Dec-12 |
| 8-52   | Pharmacy | 4-1-2-8-08-52    | x | 13-Dec-12 |
| 38-52b | PMV      | 4-1-2-38-38-52b  | x | 14-Dec-12 |
| 3-52   | Pharmacy | 4-2-3-3-03-52    | x | 08-Dec-12 |
| 49-52  | PMV      | 5-1-2-49-49-52   | x | 14-Dec-12 |
| 14-67A | Pharmacy | 6-2-3-14-14-67A  | x | 10-Dec-12 |
| 1-52   | Pharmacy | 7-2-4-1-01-52    | x | 13-Dec-12 |
| 22-52  | PMV      | 7-2-4-22-22-52   | x | 13-Dec-12 |
| 10-52  | Pharmacy | 8-2-4-10-10-52   | x | 12-Dec-12 |
| 17-52  | PMV      | 8-2-4-17-17-52   | x | 13-Dec-12 |
| 10-52a | PMV      | 9-2-2-10-10-52a  | x | 18-Dec-12 |
| 5-517  | Pharmacy | 2-3-2-5-5-517    | x | 10-Dec-12 |
| 19-50A | PMV      | 9-3-5-19-19-50A  | x | 11-Dec-12 |
| 14-52a | Pharmacy | 10-3-1-14-14-52a | x | 18-Dec-12 |
| 25-52A | PMV      | 13-2-5-25-25-52A | x | 10-Dec-12 |
| 25-52B | PMV      | 13-2-5-25-25-52B | x | 10-Dec-12 |
| 4-52   | Pharmacy | 13-3-7-4-04-52   | x | 11-Dec-12 |
| 32-52  | PMV      | 13-3-7-32-32-52  | x | 14-Dec-12 |
| 7-52   | PMV      | 14-1-1-7-07-52   | x | 14-Dec-12 |
| 1-52   | Pharmacy | 14-1-3-1-01-52   | x | 11-Dec-12 |
| 14-67B | PMV      | 15-2-1-14-14-67B | x | 17-Dec-12 |
| 36-52A | PMV      | 6-2-3-36-36-52A  | x | 08-Dec-12 |
| 66-52A | PMV      | 10-3-1-66-66-52A | x | 14-Dec-12 |
| 7-67b  | Pharmacy | 15-2-1-7-07-67b  | x | 14-Dec-12 |
| 4-52   | Pharmacy | 1-3-1-4-04-52    | x | 10-Dec-12 |
| 15-52  | Pharmacy | 1-3-1-12-15-52   | x | 13-Dec-12 |
| 13-52  | Pharmacy | 1-3-1-13-13-52   | x | 14-Dec-12 |
| 21-52  | PMV      | 1-3-1-21-21-52   | x | 13-Dec-12 |
| 42-52  | PMV      | 1-3-1-42-42-52   | x | 13-Dec-12 |
| 57-52  | PMV      | 1-3-1-57-57-52   | x | 15-Dec-12 |
| 60-52  | PMV      | 1-3-1-60-60-52   | x | 11-Dec-12 |
| 74-52  | PMV      | 1-3-1-74-74-52   | x | 14-Dec-12 |
| 77-52  | PMV      | 1-3-1-77-77-52   | x | 18-Dec-12 |
| 80-52  | PMV      | 1-3-1-80-80-52   | x | 18-Dec-12 |

|        |          |                  |   |           |
|--------|----------|------------------|---|-----------|
| 1-52   | PMV      | 1-3-1-81-01-52   | x | 18-Dec-12 |
| 28-52  | PMV      | 2-3-5-28-28-52   | x | 11-Dec-12 |
| 29-52  | PMV      | 2-3-5-29-29-52   | x | 11-Dec-12 |
| 33-52  | PMV      | 2-3-5-33-33-52   | x | 12-Dec-12 |
| 34-52  | PMV      | 2-3-5-34-34-52   | x | 12-Dec-12 |
| 2-52   | PMV      | 2-3-6-2-02-52    | x | 10-Dec-12 |
| 2-52   | Pharmacy | 3-2-1-2-02-52    | x | 10-Dec-12 |
| 14-52  | PMV      | 3-2-4-14-14-52   | x | 12-Dec-12 |
| 43-52  | PMV      | 3-2-4-43-43-52   | x | 13-Dec-12 |
| 6-52   | Pharmacy | 3-2-6-6-06-52    | x | 19-Dec-12 |
| 9-52   | Pharmacy | 4-1-2-9-09-52    | x | 11-Dec-12 |
| 15-52  | Pharmacy | 4-1-2-15-15-52   | x | 12-Dec-12 |
| 18-52  | PMV      | 4-1-2-18-18-52   | x | 14-Dec-12 |
| 23-52  | Pharmacy | 4-1-2-23-23-52   | x | 10-Dec-12 |
| 35-52  | PMV      | 4-1-2-35-35-52   | x | 13-Dec-12 |
| 38-52c | PMV      | 4-1-2-38-38-52c  | x | 14-Dec-12 |
| 21-0   | Pharmacy | 5-1-2-21-21-00   | x | 14-Dec-12 |
| 30-52  | PMV      | 5-1-2-30-30-52   | x | 10-Dec-12 |
| 55-52  | PMV      | 5-1-2-55-55-52   | x | 13-Dec-12 |
| 57-51b | Pharmacy | 5-1-2-57-57-51b  | x | 14-Dec-12 |
| 15-52  | PMV      | 6-2-1-15-15-52   | x | 17-Dec-12 |
| 14-52  | PMV      | 6-2-3-14-14-52   | x | 10-Dec-12 |
| 36-52B | PMV      | 6-2-3-36-36-52B  | x | 08-Dec-12 |
| 39-52  | PMV      | 6-2-3-39-39-52   | x | 13-Dec-12 |
| 25-52  | PMV      | 7-2-4-25-25-52   | x | 13-Dec-12 |
| 8-52   | Pharmacy | 8-2-1-8-08-52    | x | 10-Dec-12 |
| 5-52   | Pharmacy | 8-2-4-5-05-52    | x | 11-Dec-12 |
| 16-52  | PMV      | 8-2-4-16-16-52   | x | 13-Dec-12 |
| 44-52  | PMV      | 8-2-4-44-44-52   | x | 12-Dec-12 |
| 10-52b | PMV      | 9-2-2-10-10-52b  | x | 18-Dec-12 |
| 11-52  | PMV      | 9-2-2-11-11-52   | x | 18-Dec-12 |
| 8-52   | PMV      | 9-3-5-8-8-52     | x | 11-Dec-12 |
| 16-52  | PMV      | 9-3-5-16-16-52   | x | 12-Dec-12 |
| 19-52  | PMV      | 9-3-5-19-19-52   | x | 11-Dec-12 |
| 5-52   | Pharmacy | 10-3-1-5-05-52   | x | 13-Dec-12 |
| 14-52b | Pharmacy | 10-3-1-14-14-52b | x | 18-Dec-12 |
| 24-52  | PMV      | 10-3-1-24-24-52  | x | 15-Dec-12 |
| 33-52  | PMV      | 10-3-1-33-33-52  | x | 15-Dec-12 |
| 37-52  | PMV      | 10-3-1-37-37-52  | x | 11-Dec-12 |
| 66-52B | PMV      | 10-3-1-66-66-52B | x | 14-Dec-12 |
| 67-52  | PMV      | 10-3-1-67-67-52  | x | 14-Dec-12 |
| 78-52  | PMV      | 10-3-1-78-78-52  | x | 13-Dec-12 |
| 5-52   | Pharmacy | 11-2-5-5-05-52   | x | 12-Dec-12 |
| 11-52  | Pharmacy | 11-2-5-11-11-52  | x | 12-Dec-12 |
| 21-52b | PMV      | 11-2-5-21-21-52b | x | 10-Dec-12 |
| 26-52  | PMV      | 11-2-5-26-26-52  | x | 10-Dec-12 |
| 14-52  | PMV      | 11-3-7-14-14-52  | x | 11-Dec-12 |
| 15-52  | PMV      | 11-3-7-15-15-52  | x | 11-Dec-12 |
| 3-52   | Pharmacy | 12-2-5-3-03-52   | x | 12-Dec-12 |
| 12-52  | PMV      | 12-3-7-12-12-52  | x | 11-Dec-12 |



|        |          |                  |   |           |
|--------|----------|------------------|---|-----------|
| 21-52  | PMV      | 13-2-3-21-21-52  | x | 08-Dec-12 |
| 25-52  | PMV      | 13-2-5-25-25-52  | x | 10-Dec-12 |
| 28-52  | PMV      | 13-3-7-28-28-52  | x | 13-Dec-12 |
| 18-52  | PMV      | 14-1-1-18-18-52  | x | 14-Dec-12 |
| 4-52   | Pharmacy | 14-1-3-4-4-52    | x | 10-Dec-12 |
| 5-52   | Pharmacy | 14-1-3-5-05-52   | x | 11-Dec-12 |
| 5-52   | Pharmacy | 15-2-1-5-05-52   | x | 14-Dec-12 |
| 7-52   | Pharmacy | 15-2-1-7-07-52   | x | 14-Dec-12 |
| 14-52  | PMV      | 15-2-1-14-14-52  | x | 17-Dec-12 |
| 19-52  | PMV      | 15-2-1-19-19-52  | x | 18-Dec-12 |
| 10-52  | Pharmacy | 15-2-3-10-10-52  | x | 11-Dec-12 |
| 20-52  | PMV      | 15-2-3-20-20-52  | x | 12-Dec-12 |
| 26-52  | PMV      | 15-2-3-26-26-52  | x | 08-Dec-12 |
| 30-52  | PMV      | 15-2-3-30-30-52  | x | 10-Dec-12 |
| 7-52   | Pharmacy | 16-1-1-7-07-52   | x | 14-Dec-12 |
| 28-52  | PMV      | 16-1-1-28-28-52  | x | 14-Dec-12 |
| 14-52  | Pharmacy | 16-1-3-4-014-052 | x | 12-Dec-12 |
| 7-52   | Pharmacy | 16-1-3-7-07-52   | x | 11-Dec-12 |
| 27-52  | PMV      | 16-1-3-27-27-52  | x | 12-Dec-12 |
| 1-57   | Pharmacy | 2-3-6-1-01-57    | x | 10-Dec-12 |
| 1-67   | Pharmacy | 2-3-6-1-01-67    | x | 10-Dec-12 |
| 9-67B  | Pharmacy | 4-1-2-9-09-67B   | x | 11-Dec-12 |
| 1-67E  | Pharmacy | 11-2-5-1-01-67E  | x | 13-Dec-12 |
| 5-67B  | Pharmacy | 14-1-3-5-05-67B  | x | 11-Dec-12 |
| 1-67F  | Pharmacy | 11-2-5-1-01-67F  | x | 13-Dec-12 |
| 1-67G  | Pharmacy | 11-2-5-1-01-67G  | x | 13-Dec-12 |
| 21-59  | PMV      | 1-3-1-21-21-59   | x | 13-Dec-12 |
| 59-59  | PMV      | 1-3-1-59-59-59   | x | 11-Dec-12 |
| 1-59   | Pharmacy | 4-1-2-1-01-59    | x | 10-Dec-12 |
| 4-59   | Pharmacy | 4-1-2-4-04-59    | x | 12-Dec-12 |
| 9-59   | Pharmacy | 4-1-2-9-9-59     | x | 11-Dec-12 |
| 36-59  | PMV      | 4-1-2-36-36-59   | x | 12-Dec-12 |
| 7-59   | Pharmacy | 5-1-2-7-07-59    | x | 12-Dec-12 |
| 8-59   | Pharmacy | 5-1-2-8-08-59    | x | 11-Dec-12 |
| 17-59  | Pharmacy | 5-1-2-17-17-59   | x | 18-Dec-12 |
| 12-59  | Pharmacy | 5-2-3-12-12-59   | x | 08-Dec-12 |
| 6-59   | Pharmacy | 7-2-4-6-06-59    | x | 11-Dec-12 |
| 4-59   | Pharmacy | 14-1-3-4-04-59   | x | 10-Dec-12 |
| 5-59   | Pharmacy | 15-2-1-5-05-59   | x | 14-Dec-12 |
| 10-59  | Pharmacy | 15-2-3-10-10-59  | x | 11-Dec-12 |
| 2-59   | Pharmacy | 16-1-3-2-02-59   | x | 11-Dec-12 |
| 23-61  | PMV      | 4-1-2-23-23-61   | x | 10-Dec-12 |
| 37-67  | PMV      | 5-1-2-37-37-67   | x | 13-Dec-12 |
| 10-67B | Pharmacy | 12-2-5-10-10-67B | x | 12-Dec-12 |
| 8-67A  | Pharmacy | 4-1-2-8-08-67A   | x | 13-Dec-12 |
| 8-67G  | Pharmacy | 5-1-2-8-08-67G   | x | 11-Dec-12 |
| 11-67F | Pharmacy | 6-2-1-11-11-67F  | x | 18-Dec-12 |
| 5-067a | Pharmacy | 8-2-4-5-05-067a  | x | 13-Dec-12 |
| 6-67   | Pharmacy | 12-3-7-6-06-67   | x | 11-Dec-12 |
| 3-67A  | Pharmacy | 13-3-7-3-03-67A  | x | 11-Dec-12 |

|        |          |                  |   |           |
|--------|----------|------------------|---|-----------|
| 21-10  | Pharmacy | 1-3-1-21-21-10   | x | 13-Dec-12 |
| 59-10  | PMV      | 1-3-1-59-59-10   | x | 11-Dec-12 |
| 34-10  | PMV      | 2-3-5-34-34-10   | x | 12-Dec-12 |
| 36-10  | PMV      | 4-1-2-36-36-10   | x | 12-Dec-12 |
| 8-10   | Pharmacy | 5-1-2-8-08-10    | x | 11-Dec-12 |
| 11-10  | Pharmacy | 6-2-1-11-11-10   | x | 18-Dec-12 |
| 6-10   | Pharmacy | 6-2-3-6-06-10    | x | 11-Dec-12 |
| 11-10  | PMV      | 9-2-2-11-11-10   | x | 18-Dec-12 |
| 8-10   | PMV      | 9-3-5-8-8-10     | x | 11-Dec-12 |
| 2-10   | PMV      | 10-3-1-2-02-10   | x | 15-Dec-12 |
| 6-10   | Pharmacy | 11-2-5-6-06-10   | x | 21-Dec-12 |
| 9-10   | Pharmacy | 13-2-5-9-09-10   | x | 10-Dec-12 |
| 7-10   | Pharmacy | 13-3-7-7-07-10   | x | 11-Dec-12 |
| 1-10   | Pharmacy | 14-1-3-1-01-10   | x | 11-Dec-12 |
| 29-10  | Pharmacy | 15-2-1-29-29-10  | x | 14-Dec-12 |
| 38-10  | Pharmacy | 15-2-3-38-38-10  | x | 13-Dec-12 |
| 19-67B | PMV      | 15-2-1-19-19-67B | x | 18-Dec-12 |
| 28-67b | PMV      | 15-2-3-28-28-67b | x | 08-Dec-12 |
| 13-47  | PMV      | 3-2-4-13-13-47   | x | 13-Dec-12 |
| 36-47  | PMV      | 4-1-2-36-36-47   | x | 12-Dec-12 |
| 7-47   | Pharmacy | 5-2-3-7-07-47    | x | 08-Dec-12 |
| 1-47   | Pharmacy | 11-2-5-1-1-47    | x | 13-Dec-12 |
| 16-47  | Pharmacy | 12-2-5-16-16-47  | x | 10-Dec-12 |
| 4-47   | Pharmacy | 14-1-3-4-4-47    | x | 10-Dec-12 |
| 1-67C  | Pharmacy | 4-1-2-1-01-67C   | x | 10-Dec-12 |
| 1-61   | Pharmacy | 4-1-2-1-01-61    | x | 10-Dec-12 |
| 7-61   | Pharmacy | 5-2-3-7-07-61    | x | 08-Dec-12 |
| 10-2   | Pharmacy | 1-3-1-10-10-02   | x | 14-Dec-12 |
| 81-2   | Pharmacy | 1-3-1-81-81-02   | x | 18-Dec-12 |
| 2-2    | PMV      | 2-3-6-2-02-02    | x | 10-Dec-12 |
| 2-2    | Pharmacy | 3-2-1-2-02-02    | x | 10-Dec-12 |
| 7-2    | Pharmacy | 5-2-3-7-07-02    | x | 08-Dec-12 |
| 6-2    | Pharmacy | 6-2-3-6-06-02    | x | 11-Dec-12 |
| 1-2    | Pharmacy | 7-2-4-1-01-02    | x | 14-Dec-12 |
| 5-2    | Pharmacy | 8-2-4-5-05-02    | x | 11-Dec-12 |
| 1-2    | Pharmacy | 9-2-2-1-01-02    | x | 18-Dec-12 |
| 8-2    | PMV      | 9-3-6-8-08-02    | x | 13-Dec-12 |
| 2-2    | Pharmacy | 10-3-1-2-02-02   | x | 15-Dec-12 |
| 15-2   | Pharmacy | 10-3-1-15-15-02  | x | 10-Dec-12 |
| 5-2    | Pharmacy | 11-2-5-5-05-02   | x | 12-Dec-12 |
| 12-2   | Pharmacy | 11-2-5-12-12-2   | x | 12-Dec-12 |
| 16-2   | PMV      | 12-2-5-16-16-02  | x | 10-Dec-12 |
| 1-2    | Pharmacy | 14-1-1-1-01-02   | x | 13-Dec-12 |
| 29-2   | PMV      | 14-1-3-29-29-02  | x | 13-Dec-12 |
| 20-2   | PMV      | 15-2-3-20-20-02  | x | 12-Dec-12 |
| 38-2   | Pharmacy | 15-2-3-38-38-02  | x | 13-Dec-12 |
| 7-2    | Pharmacy | 16-1-3-7-07-02   | x | 11-Dec-12 |
| 11-2   | Pharmacy | 16-1-3-11-11-2   | x | 10-Dec-12 |
| 14-2   | PMV      | 16-1-3-14-14-02  | x | 12-Dec-12 |
| 30-2   | PMV      | 16-1-3-30-30-2   | x | 18-Dec-12 |

|        |          |                  |   |           |
|--------|----------|------------------|---|-----------|
| 9-5    | Pharmacy | 4-1-2-9-9-5      | x | 11-Dec-12 |
| 53-5   | PMV      | 4-1-2-53-53-05   | x | 18-Dec-12 |
| 31-5   | PMV      | 5-1-2-31-31-05   | x | 12-Dec-12 |
| 59-5   | Pharmacy | 5-1-2-59-59-05   | x | 13-Dec-12 |
| 36-05b | PMV      | 6-2-3-36-36-05b  | x | 08-Dec-12 |
| 1-5    | Pharmacy | 7-2-4-1-01-05    | x | 14-Dec-12 |
| 25-5   | PMV      | 7-2-4-25-25-05   | x | 13-Dec-12 |
| 8-5    | PMV      | 9-3-5-8-08-05    | x | 11-Dec-12 |
| 33-25A | PMV      | 10-3-1-33-33-25A | x | 15-Dec-12 |
| 71-5   | Pharmacy | 10-3-1-71-71-05  | x | 15-Dec-12 |
| 1-5    | Pharmacy | 11-2-5-1-01-05   | x | 13-Dec-12 |
| 5-5    | Pharmacy | 11-2-5-5-05-5    | x | 12-Dec-12 |
| 6-5    | Pharmacy | 11-2-5-6-06-05   | x | 21-Dec-12 |
| 3-5    | Pharmacy | 12-2-5-3-03-05   | x | 12-Dec-12 |
| 16-5   | PMV      | 12-2-5-16-16-05  | x | 10-Dec-12 |
| 28-5   | PMV      | 12-2-5-28-28-05  | x | 10-Dec-12 |
| 1-5    | Pharmacy | 14-1-1-1-01-05   | x | 13-Dec-12 |
| 4-5    | Pharmacy | 14-1-3-4-04-05   | x | 10-Dec-12 |
| 38-5   | Pharmacy | 16-1-3-38-38-05  | x | 14-Dec-12 |
| 2-6    | Pharmacy | 3-2-1-2-02-06    | x | 10-Dec-12 |
| 11-6   | Pharmacy | 6-2-1-11-11-06   | x | 18-Dec-12 |
| 6-6    | Pharmacy | 6-2-3-6-06-06    | x | 11-Dec-12 |
| 1-6    | Pharmacy | 9-2-2-1-01-06    | x | 18-Dec-12 |
| 11-6   | PMV      | 9-2-2-11-11-06   | x | 18-Dec-12 |
| 1-6    | Pharmacy | 11-2-5-1-01-06   | x | 13-Dec-12 |
| 2-6    | Pharmacy | 16-1-3-2-02-06   | x | 11-Dec-12 |
| 1-9    | Pharmacy | 7-2-4-1-01-09    | x | 14-Dec-12 |
| 1-9    | Pharmacy | 11-2-5-1-01-09   | x | 13-Dec-12 |
| 6-9    | Pharmacy | 11-2-5-6-06-09   | x | 21-Dec-12 |
| 19-67E | Pharmacy | 4-1-2-19-19-67E  | x | 14-Dec-12 |
| 9-67A  | Pharmacy | 6-2-3-9-09-67A   | x | 11-Dec-12 |
| 38-67B | Pharmacy | 15-2-3-38-38-67B | x | 13-Dec-12 |
| 12-67d | Pharmacy | 5-2-3-12-12-67d  | x | 08-Dec-12 |
| 10-67a | Pharmacy | 9-2-2-10-10-67a  | x | 18-Dec-12 |
| 19-67A | Pharmacy | 15-2-1-19-19-67A | x | 18-Dec-12 |
| 57-67a | PMV      | 5-1-2-57-57-67a  | x | 14-Dec-12 |
| 60-67B | PMV      | 1-3-1-60-60-67B  | x | 11-Dec-12 |
| 30-67  | PMV      | 2-3-5-30-30-67   | x | 11-Dec-12 |
| 1-67B  | Pharmacy | 4-1-2-1-01-67B   | x | 10-Dec-12 |
| 11-67  | PMV      | 9-3-5-11-11-67   | x | 11-Dec-12 |
| 1-19   | Pharmacy | 4-1-2-1-01-19    | x | 10-Dec-12 |
| 36-19  | PMV      | 4-1-2-36-36-19   | x | 12-Dec-12 |
| 31-19  | PMV      | 5-1-2-31-31-19   | x | 12-Dec-12 |
| 8-19   | PMV      | 9-3-6-8-08-19    | x | 13-Dec-12 |
| 16-19  | PMV      | 12-2-5-16-16-19  | x | 10-Dec-12 |
| 9-19   | Pharmacy | 14-1-3-9-9-19    | x | 12-Dec-12 |
| 5-19   | Pharmacy | 15-2-1-5-05-19   | x | 14-Dec-12 |
| 57-67b | PMV      | 5-1-2-57-57-67b  | x | 14-Dec-12 |
| 81-67  | Pharmacy | 1-3-1-81-81-67   | x | 18-Dec-12 |
| 42-67  | PMV      | 3-2-4-42-42-67   | x | 13-Dec-12 |

|        |                |                  |   |           |
|--------|----------------|------------------|---|-----------|
| 0-67   | Publichealth f | 7-3-7-0-0-67     | x | 21-Dec-12 |
| 8-67C  | Pharmacy       | 8-2-1-8-08-67C   | x | 10-Dec-12 |
| 10-67B | Pharmacy       | 8-2-4-10-10-67B  | x | 12-Dec-12 |
| 2-67   | PMV            | 10-3-1-2-02-67   | x | 15-Dec-12 |
| 1-67   | Pharmacy       | 14-1-1-1-01-67   | x | 13-Dec-12 |
| 16-67  | PMV            | 14-1-1-16-16-67  | x | 13-Dec-12 |
| 4-67D  | Pharmacy       | 14-1-3-4-04-67D  | x | 10-Dec-12 |
| 5-67a  | Pharmacy       | 15-2-1-5-05-67a  | x | 14-Dec-12 |
| 14-67A | PMV            | 15-2-1-14-14-67A | x | 17-Dec-12 |
| 10-67A | Pharmacy       | 15-2-3-10-10-67A | x | 11-Dec-12 |
| 77-29  | PMV            | 1-3-1-77-77-29   | x | 18-Dec-12 |
| 21-29  | PMV            | 3-2-4-21-21-29   | x | 10-Dec-12 |
| 1-29   | Pharmacy       | 4-1-2-1-01-29    | x | 10-Dec-12 |
| 7-29   | Pharmacy       | 5-1-2-7-07-29    | x | 12-Dec-12 |
| 7-29   | Pharmacy       | 5-2-3-7-07-29    | x | 08-Dec-12 |
| 31-29  | PMV            | 6-2-3-31-31-29   | x | 10-Dec-12 |
| 1-29   | Pharmacy       | 7-2-4-1-01-29    | x | 14-Dec-12 |
| 25-29  | PMV            | 7-2-4-25-25-29   | x | 13-Dec-12 |
| 44-29  | PMV            | 8-2-4-44-44-29   | x | 12-Dec-12 |
| 1-29   | Pharmacy       | 9-2-2-1-01-29    | x | 18-Dec-12 |
| 8-29   | PMV            | 9-3-6-8-08-29    | x | 13-Dec-12 |
| 15-29  | PMV            | 10-3-1-15-15-29  | x | 10-Dec-12 |
| 1-32   | Pharmacy       | 11-2-5-1-01-32   | x | 13-Dec-12 |
| 5-29   | Pharmacy       | 11-2-5-5-05-29   | x | 12-Dec-12 |
| 16-29  | PMV            | 12-2-5-16-16-29  | x | 10-Dec-12 |
| 18-28  | Pharmacy       | 14-1-1-18-18-28  | x | 14-Dec-12 |
| 11-29  | Pharmacy       | 16-1-3-11-11-29  | x | 10-Dec-12 |
| 4-32   | Pharmacy       | 1-3-1-4-04-32    | x | 10-Dec-12 |
| 57-32  | PMV            | 1-3-1-57-57-32   | x | 15-Dec-12 |
| 82-32  | PMV            | 1-3-1-82-82-32   | x | 18-Dec-12 |
| 56-32  | PMV            | 5-1-2-56-56-32   | x | 13-Dec-12 |
| 8-32   | PMV            | 9-3-6-8-08-32    | x | 13-Dec-12 |
| 2-32   | Pharmacy       | 10-3-1-2-02-32   | x | 15-Dec-12 |
| 21-67A | PMV            | 10-3-1-21-21-67A | x | 13-Dec-12 |
| 31-32  | Pharmacy       | 10-3-1-3-31-32   | x | 14-Dec-12 |
| 24-32  | PMV            | 11-3-7-24-24-32  | x | 11-Dec-12 |
| 16-37  | PMV            | 12-2-5-16-16-37  | x | 10-Dec-12 |
| 14-67B | PMV            | 6-2-3-14-14-67B  | x | 10-Dec-12 |
| 8-67C  | Pharmacy       | 4-1-2-8-08-67C   | x | 13-Dec-12 |
| 53-67B | PMV            | 4-1-2-53-53-67B  | x | 18-Dec-12 |
| 19-67C | PMV            | 4-1-2-19-19-67C  | x | 14-Dec-12 |
| 5-067b | Pharmacy       | 8-2-4-5-05-067b  | x | 13-Dec-12 |
| 6-67A  | Pharmacy       | 9-2-2-6-06-67A   | x | 18-Dec-12 |
| 29-67C | PMV            | 15-2-1-29-29-67C | x | 14-Dec-12 |
| 57-40  | PMV            | 1-3-1-57-57-40   | x | 15-Dec-12 |
| 14-40  | PMV            | 3-2-4-14-14-40   | x | 12-Dec-12 |
| 31-40  | PMV            | 5-1-2-31-31-40   | x | 12-Dec-12 |
| 11-40  | Pharmacy       | 6-2-1-11-11-40   | x | 18-Dec-12 |
| 6-40   | Pharmacy       | 6-2-3-6-06-40    | x | 11-Dec-12 |
| 10-40  | Pharmacy       | 8-2-4-10-10-40   | x | 12-Dec-12 |

|        |          |                  |   |           |
|--------|----------|------------------|---|-----------|
| 1-40   | Pharmacy | 9-2-2-1-01-40    | x | 18-Dec-12 |
| 1-40   | Pharmacy | 11-2-5-1-01-40   | x | 13-Dec-12 |
| 5-40   | Pharmacy | 11-2-5-5-05-40   | x | 12-Dec-12 |
| 9-40   | Pharmacy | 13-3-7-9-09-40   | x | 11-Dec-12 |
| 7-40   | Pharmacy | 15-2-1-7-07-40   | x | 14-Dec-12 |
| 4-41   | Pharmacy | 4-1-2-4-04-41    | x | 12-Dec-12 |
| 3-33   | Pharmacy | 4-2-3-3-03-33    | x | 08-Dec-12 |
| 7-67a  | Pharmacy | 3-2-4-7-07-67a   | x | 12-Dec-12 |
| 23-67  | PMV      | 4-1-2-23-23-67   | x | 18-Dec-12 |
| 7-67C  | Pharmacy | 5-1-2-7-07-67C   | x | 12-Dec-12 |
| 17-67a | PMV      | 5-1-2-17-17-67a  | x | 13-Dec-12 |
| 22-67c | PMV      | 5-1-2-22-22-67c  | x | 13-Dec-12 |
| 28-67D | PMV      | 6-2-1-28-28-67D  | x | 12-Dec-12 |
| 1-67A  | Pharmacy | 6-2-3-1-01-67A   | x | 21-Dec-12 |
| 20-67B | PMV      | 7-2-4-20-20-67B  | x | 08-Dec-12 |
| 25-67  | PMV      | 7-2-4-25-25-67   | x | 14-Dec-12 |
| 33-67  | PMV      | 10-3-1-33-33-67  | x | 08-Dec-12 |
| 1-67B  | Pharmacy | 11-2-5-1-01-67B  | x | 11-Dec-12 |
| 5-67A  | Pharmacy | 11-2-5-5-05-67A  | x | 10-Dec-12 |
| 6-67A  | Pharmacy | 11-2-5-6-06-67A  | x | 04-Dec-12 |
| 11-67  | Pharmacy | 11-2-5-11-11-67  | x | 14-Dec-12 |
| 16-67  | Pharmacy | 13-2-3-16-16-67  | x | 10-Dec-12 |
| 9-67   | Pharmacy | 13-2-5-9-09-67   | x | 15-Dec-12 |
| 25-67  | PMV      | 13-2-5-25-25-67  | x | 12-Dec-12 |
| 5-67c  | Pharmacy | 15-2-1-5-05-67c  | x | 10-Dec-12 |
| 19-67C | PMV      | 15-2-1-19-19-67C | x | 10-Dec-12 |
| 20-67  | PMV      | 15-2-3-20-20-67  | x | 18-Dec-12 |
| 34-67b | PMV      | 15-2-3-34-34-67b | x | 12-Dec-12 |
| 19-67D | PMV      | 15-2-1-19-19-67D | x | 18-Dec-12 |
| 7-67b  | Pharmacy | 3-2-4-7-07-67b   | x | 11-Dec-12 |
| 37-67F | PMV      | 6-2-3-37-37-67F  | x | 12-Dec-12 |
| 1-67C  | Pharmacy | 7-2-4-1-01-67C   | x | 13-Dec-12 |
| 5-067c | Pharmacy | 8-2-4-5-05-067c  | x | 13-Dec-12 |
| 5-67d  | Pharmacy | 15-2-1-5-05-67d  | x | 14-Dec-12 |
| 28-67a | PMV      | 15-2-3-28-28-67a | x | 08-Dec-12 |
| 77-48  | PMV      | 1-3-1-77-77-48   | x | 18-Dec-12 |
| 5-48   | PMV      | 2-3-2-5-05-48    | x | 10-Dec-12 |
| 53-48  | PMV      | 4-1-2-53-53-48   | x | 18-Dec-12 |
| 57-48  | PMV      | 5-1-2-57-57-48   | x | 14-Dec-12 |
| 59-48  | PMV      | 5-1-2-59-59-48   | x | 13-Dec-12 |
| 12-48  | Pharmacy | 5-2-3-12-12-48   | x | 08-Dec-12 |
| 11-48  | Pharmacy | 6-2-1-11-11-48   | x | 18-Dec-12 |
| 37-48  | PMV      | 6-2-3-37-37-48   | x | 12-Dec-12 |
| 1-48   | Pharmacy | 7-2-4-1-01-48    | x | 13-Dec-12 |
| 25-48  | PMV      | 7-2-4-25-25-48   | x | 13-Dec-12 |
| 1-45   | Pharmacy | 9-2-2-1-01-45    | x | 18-Dec-12 |
| 1-48   | Pharmacy | 11-2-5-1-01-48   | x | 13-Dec-12 |
| 5-48   | Pharmacy | 11-2-5-5-05-48   | x | 12-Dec-12 |
| 10-47  | Pharmacy | 12-2-5-10-10-47  | x | 12-Dec-12 |
| 9-48   | Pharmacy | 13-2-5-9-09-48   | x | 10-Dec-12 |

|        |                |                 |   |           |
|--------|----------------|-----------------|---|-----------|
| 14-48  | PMV            | 15-2-1-14-14-48 | x | 17-Dec-12 |
| 38-48  | PMV            | 15-2-3-38-38-48 | x | 13-Dec-12 |
| 4-51   | Pharmacy       | 1-3-1-4-04-51   | x | 10-Dec-12 |
| 12-51  | Pharmacy       | 1-3-1-12-12-51  | x | 13-Dec-12 |
| 13-51  | Pharmacy       | 1-3-1-13-13-51  | x | 14-Dec-12 |
| 33-51  | PMV            | 1-3-1-33-33-51  | x | 15-Dec-12 |
| 36-51  | PMV            | 1-3-1-36-36-51  | x | 18-Dec-12 |
| 38-51  | PMV            | 1-3-1-38-38-51  | x | 14-Dec-12 |
| 59-51  | PMV            | 1-3-1-59-59-51  | x | 11-Dec-12 |
| 60-51A | PMV            | 1-3-1-60-60-51A | x | 13-Dec-12 |
| 69-31  | PMV            | 1-3-1-69-69-31  | x | 14-Dec-12 |
| 77-51  | PMV            | 1-3-1-77-77-51  | x | 18-Dec-12 |
| 80-51  | PMV            | 1-3-1-80-80-51  | x | 18-Dec-12 |
| 82-51  | PMV            | 1-3-1-82-82-51  | x | 18-Dec-12 |
| 83-51  | PMV            | 1-3-1-83-83-51  | x | 18-Dec-12 |
| 84-51  | PMV            | 1-3-1-84-84-51  | x | 18-Dec-12 |
| 5-49   | PMV            | 2-3-2-5-05-49   | x | 10-Dec-12 |
| 2-49   | PMV            | 2-3-6-2-02-49   | x | 10-Dec-12 |
| 2-51   | Pharmacy       | 3-2-1-2-02-51   | x | 10-Dec-12 |
| 2-51   | Pharmacy       | 3-2-4-2-02-51   | x | 10-Dec-12 |
| 8-51   | Pharmacy       | 3-2-4-8-08-51   | x | 11-Dec-12 |
| 14-51  | Pharmacy       | 3-2-4-14-14-51  | x | 12-Dec-12 |
| 15-51  | PMV            | 3-2-4-15-15-51  | x | 11-Dec-12 |
| 42-51  | PMV            | 3-2-4-42-42-51  | x | 13-Dec-12 |
| 6-51   | PMV            | 3-2-6-6-06-51   | x | 19-Dec-12 |
| 15-51  | Pharmacy       | 4-1-2-15-15-51  | x | 12-Dec-12 |
| 23-51  | Pharmacy       | 4-1-2-23-23-51  | x | 10-Dec-12 |
| 53-51  | PMV            | 4-1-2-53-53-51  | x | 18-Dec-12 |
| 3-49   | Pharmacy       | 4-2-3-3-03-49   | x | 08-Dec-12 |
| 8-51   | Pharmacy       | 5-1-2-8-08-51   | x | 11-Dec-12 |
| 46-51  | PMV            | 5-1-2-46-46-51  | x | 14-Dec-12 |
| 56-51  | PMV            | 5-1-2-56-56-51  | x | 13-Dec-12 |
| 57-51a | PMV            | 5-1-2-57-57-51a | x | 14-Dec-12 |
| 59-51  | PMV            | 5-1-2-59-59-51  | x | 13-Dec-12 |
| 0-51   | Publichealth f | 5-2-1-0-0-51    | x | 20-Dec-12 |
| 12-51  | Pharmacy       | 5-2-3-12-12-51  | x | 08-Dec-12 |
| 1-51   | Pharmacy       | 6-2-1-1-01-51   | x | 14-Dec-12 |
| 11-51  | Pharmacy       | 6-2-1-11-11-51  | x | 18-Dec-12 |
| 1-51   | Pharmacy       | 6-2-3-1-01-51   | x | 12-Dec-12 |
| 9-51   | Pharmacy       | 6-2-3-9-09-51   | x | 11-Dec-12 |
| 25-51  | PMV            | 6-2-3-25-25-51  | x | 08-Dec-12 |
| 27-51  | PMV            | 6-2-3-27-27-51  | x | 08-Dec-12 |
| 31-51  | PMV            | 6-2-3-31-31-51  | x | 10-Dec-12 |
| 37-51  | PMV            | 6-2-3-37-37-51  | x | 12-Dec-12 |
| 1-51   | Pharmacy       | 7-2-4-1-01-51   | x | 14-Dec-12 |
| 22-51A | PMV            | 7-2-4-22-22-51A | x | 13-Dec-12 |
| 8-51   | Pharmacy       | 8-2-1-8-08-51   | x | 10-Dec-12 |
| 5-51   | Pharmacy       | 8-2-4-5-05-51   | x | 11-Dec-12 |
| 10-51  | Pharmacy       | 8-2-4-10-10-51  | x | 12-Dec-12 |
| 16-49  | PMV            | 8-2-4-16-16-49  | x | 13-Dec-12 |

|       |          |                 |   |           |
|-------|----------|-----------------|---|-----------|
| 23-51 | PMV      | 8-2-4-23-23-51  | x | 13-Dec-12 |
| 2-51  | Pharmacy | 9-2-2-2-02-51   | x | 18-Dec-12 |
| 10-51 | Pharmacy | 9-2-2-10-10-51  | x | 18-Dec-12 |
| 11-51 | Pharmacy | 9-2-2-11-11-51  | x | 18-Dec-12 |
| 19-51 | PMV      | 9-3-5-19-19-51  | x | 11-Dec-12 |
| 8-51  | PMV      | 9-3-6-8-08-51   | x | 13-Dec-12 |
| 1-51  | PMV      | 10-3-1-1-01-51  | x | 14-Dec-12 |
| 2-51  | Pharmacy | 10-3-1-2-02-51  | x | 15-Dec-12 |
| 5-51  | Pharmacy | 10-3-1-5-05-51  | x | 13-Dec-12 |
| 8-51  | Pharmacy | 10-3-1-8-08-51  | x | 18-Dec-12 |
| 14-51 | Pharmacy | 10-3-1-14-14-51 | x | 18-Dec-12 |
| 21-51 | PMV      | 10-3-1-21-21-51 | x | 13-Dec-12 |
| 31-51 | PMV      | 10-3-1-31-31-51 | x | 14-Dec-12 |
| 33-51 | PMV      | 10-3-1-33-33-51 | x | 15-Dec-12 |
| 37-51 | PMV      | 10-3-1-37-37-51 | x | 11-Dec-12 |
| 53-51 | PMV      | 10-3-1-53-53-51 | x | 18-Dec-12 |
| 66-51 | PMV      | 10-3-1-66-66-51 | x | 14-Dec-12 |
| 71-51 | PMV      | 10-3-1-71-71-51 | x | 15-Dec-12 |
| 78-51 | PMV      | 10-3-1-78-78-51 | x | 13-Dec-12 |
| 79-51 | PMV      | 10-3-1-79-79-51 | x | 11-Dec-12 |
| 1-51  | Pharmacy | 11-2-5-1-01-51  | x | 13-Dec-12 |
| 6-51  | Pharmacy | 11-2-5-3-06-51  | x | 12-Dec-12 |
| 5-51  | Pharmacy | 11-2-5-5-05-51  | x | 12-Dec-12 |
| 6-51  | Pharmacy | 11-2-5-6-06-51  | x | 21-Dec-12 |
| 11-51 | Pharmacy | 11-2-5-11-11-51 | x | 12-Dec-12 |
| 12-51 | PMV      | 11-2-5-12-12-51 | x | 12-Dec-12 |
| 22-51 | PMV      | 11-2-5-22-22-51 | x | 10-Dec-12 |
| 26-51 | PMV      | 11-2-5-26-26-51 | x | 10-Dec-12 |
| 15-51 | PMV      | 11-3-7-15-15-51 | x | 11-Dec-12 |
| 10-51 | Pharmacy | 12-2-5-10-10-51 | x | 12-Dec-12 |
| 16-51 | PMV      | 12-2-5-16-16-51 | x | 10-Dec-12 |
| 18-51 | PMV      | 12-3-7-18-18-51 | x | 11-Dec-12 |
| 23-51 | PMV      | 12-3-7-23-23-51 | x | 11-Dec-12 |
| 16-51 | PMV      | 13-2-3-16-16-51 | x | 08-Dec-12 |
| 3-49  | Pharmacy | 13-3-7-3-03-49  | x | 11-Dec-12 |
| 9-49  | Pharmacy | 13-2-5-9-09-49  | x | 10-Dec-12 |
| 4-51  | Pharmacy | 13-3-7-4-04-51  | x | 11-Dec-12 |
| 8-51  | Pharmacy | 13-3-7-8-08-51  | x | 11-Dec-12 |
| 28-57 | PMV      | 13-3-7-28-28-57 | x | 13-Dec-12 |
| 31-51 | PMV      | 13-3-7-31-31-51 | x | 14-Dec-12 |
| 33-51 | PMV      | 13-3-7-33-33-51 | x | 14-Dec-12 |
| 1-51  | PMV      | 14-1-1-1-01-51  | x | 13-Dec-12 |
| 6-51  | PMV      | 14-1-1-6-6-51   | x | 14-Dec-12 |
| 7-51  | PMV      | 14-1-1-7-07-51  | x | 14-Dec-12 |
| 4-51  | Pharmacy | 14-1-3-4-04-51  | x | 10-Dec-12 |
| 5-51  | Pharmacy | 14-1-3-5-05-51  | x | 11-Dec-12 |
| 9-51  | Pharmacy | 14-1-3-9-9-51   | x | 12-Dec-12 |
| 10-51 | Pharmacy | 14-1-3-10-10-51 | x | 13-Dec-12 |
| 23-51 | PMV      | 14-1-3-23-23-51 | x | 12-Dec-12 |
| 35-51 | PMV      | 14-1-3-35-35-51 | x | 14-Dec-12 |

|        |          |                  |   |           |
|--------|----------|------------------|---|-----------|
| 4-51   | Pharmacy | 15-2-1-4-4-51    | x | 12-Dec-12 |
| 5-51   | Pharmacy | 15-2-1-5-05-51   | x | 14-Dec-12 |
| 7-51   | Pharmacy | 15-2-1-7-07-51   | x | 14-Dec-12 |
| 14-51  | Pharmacy | 15-2-1-14-14-51  | x | 17-Dec-12 |
| 17-51  | PMV      | 15-2-1-17-17-51  | x | 14-Dec-12 |
| 29-51  | PMV      | 15-2-1-29-29-51  | x | 14-Dec-12 |
| 10-51  | Pharmacy | 15-2-3-10-10-51  | x | 11-Dec-12 |
| 15-51  | Pharmacy | 15-2-3-15-15-51  | x | 10-Dec-12 |
| 20-51  | PMV      | 15-2-3-20-20-51  | x | 12-Dec-12 |
| 30-51  | PMV      | 15-2-3-30-30-51  | x | 10-Dec-12 |
| 38-51  | PMV      | 15-2-3-38-38-51  | x | 13-Dec-12 |
| 7-51   | Pharmacy | 16-1-1-7-07-51   | x | 14-Dec-12 |
| 6-51   | Pharmacy | 16-1-3-6-06-051  | x | 12-Dec-12 |
| 7-51   | Pharmacy | 16-1-3-7-07-51   | x | 11-Dec-12 |
| 11-51  | Pharmacy | 16-1-3-11-11-51  | x | 10-Dec-12 |
| 30-51  | PMV      | 16-1-3-30-30-51  | x | 18-Dec-12 |
| 38-51  | PMV      | 16-1-3-38-38-51  | x | 14-Dec-12 |
| 2-19   | Pharmacy | 5-1-2-2-2-19     | x | 10-Dec-12 |
| 53-67C | PMV      | 4-1-2-53-53-67C  | x | 18-Dec-12 |
| 7-67E  | Pharmacy | 5-1-2-7-7-67E    | x | 12-Dec-12 |
| 9-67   | Pharmacy | 13-2-5-9-09-67   | x | 10-Dec-12 |
| 4-67A  | Pharmacy | 14-1-3-4-4-67A   | x | 10-Dec-12 |
| 29-67  | PMV      | 14-1-3-29-29-67  | x | 13-Dec-12 |
| 38-67J | PMV      | 15-2-3-38-38-67J | x | 13-Dec-12 |
| 33-53  | PMV      | 1-3-1-33-33-53   | x | 15-Dec-12 |
| 1-53   | Pharmacy | 2-3-6-1-01-53    | x | 10-Dec-12 |
| 36-53  | PMV      | 4-1-2-36-36-53   | x | 12-Dec-12 |
| 8-53   | Pharmacy | 5-1-2-8-08-53    | x | 11-Dec-12 |
| 57-53  | PMV      | 5-1-2-57-57-53   | x | 14-Dec-12 |
| 11-53  | Pharmacy | 6-2-1-11-11-53   | x | 18-Dec-12 |
| 37-53  | PMV      | 6-2-3-37-37-53   | x | 12-Dec-12 |
| 6-53   | Pharmacy | 7-2-4-6-06-53    | x | 11-Dec-12 |
| 5-53   | Pharmacy | 8-2-4-5-05-053   | x | 13-Dec-12 |
| 21-53  | PMV      | 10-3-1-21-21-53  | x | 13-Dec-12 |
| 33-53  | PMV      | 10-3-1-33-33-53  | x | 15-Dec-12 |
| 6-53   | Pharmacy | 11-2-5-6-06-53   | x | 21-Dec-12 |
| 11-53  | Pharmacy | 11-2-5-11-11-53  | x | 12-Dec-12 |
| 23-53  | PMV      | 12-3-7-23-23-53  | x | 11-Dec-12 |
| 33-53  | PMV      | 13-3-7-33-33-53  | x | 14-Dec-12 |
| 9-55   | Pharmacy | 14-1-3-9-9-55    | x | 12-Dec-12 |
| 38-53  | PMV      | 15-2-3-38-38-53  | x | 13-Dec-12 |
| 14-53  | Pharmacy | 16-1-3-4-014-053 | x | 12-Dec-12 |
| 11-53  | Pharmacy | 16-1-3-11-11-53  | x | 10-Dec-12 |
| 33-67B | PMV      | 2-3-5-33-33-67B  | x | 12-Dec-12 |
| 8-67H  | Pharmacy | 5-1-2-8-8-67H    | x | 11-Dec-12 |
| 31-67  | PMV      | 5-1-2-31-31-67   | x | 12-Dec-12 |
| 1-67C  | Pharmacy | 11-2-5-1-01-67C  | x | 13-Dec-12 |
| 4-067B | Pharmacy | 14-1-3-4-04-067B | x | 10-Dec-12 |
| 33-55  | PMV      | 2-3-5-33-33-55   | x | 12-Dec-12 |
| 6-55   | PMV      | 6-2-3-6-06-55    | x | 11-Dec-12 |



|        |          |                  |   |           |
|--------|----------|------------------|---|-----------|
| 15-55  | Pharmacy | 10-3-1-15-15-55  | x | 10-Dec-12 |
| 2-55   | Pharmacy | 16-1-3-2-02-55   | x | 11-Dec-12 |
| 10-56  | Pharmacy | 1-3-1-10-10-056  | x | 14-Dec-12 |
| 7-56   | Pharmacy | 3-2-4-7-07-56    | x | 11-Dec-12 |
| 42-56  | PMV      | 3-2-4-42-42-56   | x | 13-Dec-12 |
| 1-56   | Pharmacy | 4-1-2-1-01-56    | x | 10-Dec-12 |
| 9-56   | Pharmacy | 4-1-2-9-09-56    | x | 11-Dec-12 |
| 8-56   | Pharmacy | 5-1-2-8-08-56    | x | 11-Dec-12 |
| 11-56  | Pharmacy | 6-2-1-11-11-56   | x | 18-Dec-12 |
| 6-56   | Pharmacy | 7-2-4-6-06-56    | x | 11-Dec-12 |
| 2-56   | Pharmacy | 10-3-1-2-02-56   | x | 15-Dec-12 |
| 8-56   | Pharmacy | 10-3-1-8-08-56   | x | 18-Dec-12 |
| 15-56  | Pharmacy | 10-3-1-15-15-56  | x | 10-Dec-12 |
| 33-56  | PMV      | 10-3-1-33-33-56  | x | 15-Dec-12 |
| 37-56  | PMV      | 10-3-1-37-37-56  | x | 11-Dec-12 |
| 71-56  | PMV      | 10-3-1-71-71-56  | x | 15-Dec-12 |
| 6-56   | Pharmacy | 11-2-5-6-06-56   | x | 21-Dec-12 |
| 12-26  | Pharmacy | 11-2-5-12-12-26  | x | 12-Dec-12 |
| 26-67b | PMV      | 11-2-5-26-26-67b | x | 10-Dec-12 |
| 16-56  | PMV      | 12-2-5-16-16-56  | x | 10-Dec-12 |
| 33-56  | PMV      | 13-3-7-33-33-56  | x | 14-Dec-12 |
| 38-56  | PMV      | 15-2-3-38-38-56  | x | 13-Dec-12 |
| 2-56   | Pharmacy | 16-1-3-2-02-56   | x | 11-Dec-12 |
| 8-61   | Pharmacy | 3-2-4-8-08-61    | x | 11-Dec-12 |
| 9-61   | Pharmacy | 4-1-2-9-09-61    | x | 11-Dec-12 |
| 8-61   | Pharmacy | 5-1-2-8-08-61    | x | 11-Dec-12 |
| 11-61  | Pharmacy | 5-1-2-11-11-61   | x | 12-Dec-12 |
| 25-61  | PMV      | 6-2-3-25-25-61   | x | 08-Dec-12 |
| 31-61  | PMV      | 6-2-3-31-31-61   | x | 10-Dec-12 |
| 6-61   | Pharmacy | 7-2-4-6-06-61    | x | 11-Dec-12 |
| 5-61   | Pharmacy | 8-2-4-5-05-61    | x | 11-Dec-12 |
| 21-61  | PMV      | 10-3-1-21-21-61  | x | 13-Dec-12 |
| 5-61   | Pharmacy | 11-2-5-5-05-61   | x | 12-Dec-12 |
| 30-61  | PMV      | 15-2-3-30-30-61  | x | 10-Dec-12 |
| 26-61  | PMV      | 16-1-3-26-26-61  | x | 12-Dec-12 |
| 2-62   | Pharmacy | 3-2-1-2-02-62    | x | 10-Dec-12 |
| 14-62  | PMV      | 3-2-4-14-14-62   | x | 12-Dec-12 |
| 6-62   | PMV      | 3-2-6-6-06-62    | x | 19-Dec-12 |
| 8-62   | Pharmacy | 4-1-2-8-08-62    | x | 13-Dec-12 |
| 8-62   | Pharmacy | 5-1-2-8-08-62    | x | 11-Dec-12 |
| 28-62  | PMV      | 6-2-1-28-28-62   | x | 14-Dec-12 |
| 6-62   | Pharmacy | 6-2-3-6-06-62    | x | 11-Dec-12 |
| 23-62  | PMV      | 8-2-4-23-23-62   | x | 13-Dec-12 |
| 20-62  | PMV      | 9-3-5-20-20-62   | x | 11-Dec-12 |
| 1-62   | Pharmacy | 11-2-5-1-01-62   | x | 13-Dec-12 |
| 6-62   | Pharmacy | 11-2-5-6-06-62   | x | 21-Dec-12 |
| 32-62  | PMV      | 14-1-3-32-32-62  | x | 14-Dec-12 |
| 17-62  | PMV      | 15-2-1-17-17-62  | x | 14-Dec-12 |
| 34-62  | PMV      | 15-2-3-34-34-62  | x | 08-Dec-12 |
| 82-66  | PMV      | 1-3-1-82-82-66   | x | 18-Dec-12 |

|        |          |                 |   |           |
|--------|----------|-----------------|---|-----------|
| 2-66   | Pharmacy | 3-2-4-2-02-66   | x | 10-Dec-12 |
| 6-66   | PMV      | 3-2-6-6-06-66   | x | 19-Dec-12 |
| 1-66   | Pharmacy | 4-1-2-1-01-66   | x | 10-Dec-12 |
| 31-66  | PMV      | 5-1-2-31-31-66  | x | 12-Dec-12 |
| 12-66  | Pharmacy | 5-2-3-12-12-66  | x | 08-Dec-12 |
| 14-66  | Pharmacy | 6-2-3-14-14-66  | x | 10-Dec-12 |
| 5-66   | Pharmacy | 8-2-4-5-05-66   | x | 11-Dec-12 |
| 2-66   | Pharmacy | 10-3-1-2-02-66  | x | 15-Dec-12 |
| 31-12  | PMV      | 10-3-1-31-31-12 | x | 14-Dec-12 |
| 71-66  | PMV      | 10-3-1-71-71-66 | x | 15-Dec-12 |
| 16-66  | PMV      | 12-2-5-16-16-66 | x | 10-Dec-12 |
| 32-66  | PMV      | 14-1-3-32-32-66 | x | 14-Dec-12 |
| 7-66   | Pharmacy | 15-2-1-7-07-66  | x | 14-Dec-12 |
| 79-17  | PMV      | 10-3-1-79-79-17 | x | 11-Dec-12 |
| 22-67a | Pharmacy | 5-1-2-22-22-67a | x | 04-Dec-12 |
| 4-17   | Pharmacy | 1-3-1-4-04-17   | x | 10-Dec-12 |
| 10-17  | Pharmacy | 1-3-1-10-10-017 | x | 14-Dec-12 |
| 12-17  | Pharmacy | 1-3-1-12-12-17  | x | 13-Dec-12 |
| 13-17  | Pharmacy | 1-3-1-13-13-17  | x | 14-Dec-12 |
| 38-17  | PMV      | 1-3-1-38-38-17  | x | 14-Dec-12 |
| 39-17  | PMV      | 1-3-1-39-39-17  | x | 14-Dec-12 |
| 57-17  | PMV      | 1-3-1-57-57-17  | x | 15-Dec-12 |
| 68-17  | PMV      | 1-3-1-68-68-17  | x | 14-Dec-12 |
| 69-17  | PMV      | 1-3-1-69-69-17  | x | 14-Dec-12 |
| 70-17  | PMV      | 1-3-1-70-70-17  | x | 15-Dec-12 |
| 74-17  | PMV      | 1-3-1-74-74-17  | x | 14-Dec-12 |
| 81-17  | PMV      | 1-3-1-81-81-17  | x | 18-Dec-12 |
| 82-17  | PMV      | 1-3-1-82-82-17  | x | 18-Dec-12 |
| 8-17   | PMV      | 2-3-2-8-08-17   | x | 10-Dec-12 |
| 3-17   | PMV      | 2-3-4-3-3-17    | x | 10-Dec-12 |
| 4-17   | PMV      | 2-3-5-4-04-17   | x | 11-Dec-12 |
| 25-27  | PMV      | 2-3-5-25-25-27  | x | 11-Dec-12 |
| 1-17   | Pharmacy | 2-3-6-1-01-17   | x | 10-Dec-12 |
| 2-17   | PMV      | 2-3-6-2-02-17   | x | 10-Dec-12 |
| 26-17  | PMV      | 3-2-4-26-26-17  | x | 14-Dec-12 |
| 9-17   | Pharmacy | 4-1-2-9-9-17    | x | 11-Dec-12 |
| 15-17  | PMV      | 4-1-2-15-15-17  | x | 12-Dec-12 |
| 19-17  | PMV      | 4-1-2-19-19-17  | x | 14-Dec-12 |
| 53-12  | PMV      | 4-1-2-53-53-12  | x | 18-Dec-12 |
| 11-17  | Pharmacy | 5-1-2-11-11-17  | x | 12-Dec-12 |
| 27-17  | PMV      | 5-1-2-27-27-17  | x | 14-Dec-12 |
| 11-17  | Pharmacy | 6-2-1-11-11-17  | x | 18-Dec-12 |
| 13-17  | PMV      | 6-2-1-13-13-17  | x | 13-Dec-12 |
| 15-17  | PMV      | 6-2-1-15-15-17  | x | 17-Dec-12 |
| 14-17  | PMV      | 6-2-3-14-14-17  | x | 10-Dec-12 |
| 39-17  | PMV      | 6-2-3-39-39-17  | x | 13-Dec-12 |
| 38-17  | PMV      | 16-1-3-38-38-17 | x | 14-Dec-12 |
| 2-17   | PMV      | 9-2-2-2-02-17   | x | 18-Dec-12 |
| 7-17b  | PMV      | 9-2-2-7-07-17b  | x | 18-Dec-12 |
| 10-17a | PMV      | 9-2-2-10-10-17a | x | 18-Dec-12 |

|        |                |                  |   |           |
|--------|----------------|------------------|---|-----------|
| 5-17   | Pharmacy       | 11-2-5-5-05-17   | x | 12-Dec-12 |
| 3-17   | PMV            | 9-3-3-3-03-17    | x | 13-Dec-12 |
| 8-17   | PMV            | 9-3-5-8-08-17    | x | 11-Dec-12 |
| 11-17  | PMV            | 9-3-5-11-11-17   | x | 11-Dec-12 |
| 31-17  | PMV            | 9-3-5-31-31-17   | x | 12-Dec-12 |
| 8-17A  | PMV            | 9-3-6-8-08-17A   | x | 13-Dec-12 |
| 20-17B | PMV            | 10-3-1-20-20-17B | x | 13-Dec-12 |
| 25-17  | PMV            | 10-3-1-25-25-17  | x | 15-Dec-12 |
| 33-17  | PMV            | 10-3-1-33-33-17  | x | 15-Dec-12 |
| 66-17  | PMV            | 10-3-1-66-66-17  | x | 14-Dec-12 |
| 72-17  | PMV            | 10-3-1-72-72-17  | x | 15-Dec-12 |
| 11-17  | Pharmacy       | 11-2-5-11-11-17  | x | 12-Dec-12 |
| 27-17  | PMV            | 11-3-7-27-27-17  | x | 11-Dec-12 |
| 4-17   | Pharmacy       | 12-2-5-4-04-17   | x | 12-Dec-12 |
| 24-17  | PMV            | 12-2-5-24-24-17  | x | 10-Dec-12 |
| 12-17  | PMV            | 12-3-7-12-12-17  | x | 11-Dec-12 |
| 16-17  | Pharmacy       | 13-2-3-16-16-17  | x | 08-Dec-12 |
| 3-17   | Pharmacy       | 13-3-7-3-03-17   | x | 11-Dec-12 |
| 4-17   | Pharmacy       | 13-3-7-4-04-17   | x | 11-Dec-12 |
| 9-17   | Pharmacy       | 13-3-7-9-09-17   | x | 11-Dec-12 |
| 32-17  | PMV            | 13-3-7-32-32-17  | x | 14-Dec-12 |
| 5-17   | Pharmacy       | 14-1-1-5-05-17   | x | 14-Dec-12 |
| 6-17A  | Pharmacy       | 14-1-1-6-06-17A  | x | 14-Dec-12 |
| 6-17B  | Pharmacy       | 14-1-1-6-06-17B  | x | 14-Dec-12 |
| 7-17   | Pharmacy       | 14-1-1-7-07-17   | x | 14-Dec-12 |
| 15-17a | PMV            | 14-1-1-15-15-17a | x | 13-Dec-12 |
| 1-17   | Pharmacy       | 14-1-3-1-01-17   | x | 11-Dec-12 |
| 5-17   | Pharmacy       | 14-1-3-5-05-17   | x | 11-Dec-12 |
| 9-17   | Pharmacy       | 14-1-3-9-9-17    | x | 12-Dec-12 |
| 25-14  | PMV            | 14-1-3-25-25-14  | x | 14-Dec-12 |
| 35-17a | PMV            | 14-1-3-35-35-17a | x | 14-Dec-12 |
| 4-17   | Pharmacy       | 15-2-1-4-04-17   | x | 12-Dec-12 |
| 7-17   | Pharmacy       | 15-2-1-7-07-17   | x | 14-Dec-12 |
| 14-17  | PMV            | 15-2-1-14-14-17  | x | 17-Dec-12 |
| 29-17  | PMV            | 15-2-1-29-29-17  | x | 14-Dec-12 |
| 15-17  | Pharmacy       | 15-2-3-15-15-17  | x | 10-Dec-12 |
| 38-17  | PMV            | 15-2-3-38-38-17  | x | 13-Dec-12 |
| 17-17  | PMV            | 16-1-1-17-17-17  | x | 14-Dec-12 |
| 28-17A | PMV            | 16-1-1-28-28-17A | x | 14-Dec-12 |
| 7-17   | Pharmacy       | 16-1-3-7-07-17   | x | 11-Dec-12 |
| 26-17  | PMV            | 16-1-3-26-26-17  | x | 12-Dec-12 |
| 31-17A | PMV            | 16-1-3-31-31-17A | x | 18-Dec-12 |
| 8-17   | Pharmacy       | 13-3-7-8-08-17   | x | 11-Dec-12 |
| 13-42  | PMV            | 3-2-4-13-13-42   | x | 13-Dec-12 |
| 4-42   | Pharmacy       | 4-1-2-4-04-42    | x | 12-Dec-12 |
| 33-42  | PMV            | 5-1-2-33-33-42   | x | 12-Dec-12 |
| 28-42  | PMV            | 6-2-1-28-28-42   | x | 14-Dec-12 |
| 27-42  | PMV            | 7-2-4-27-27-42   | x | 12-Dec-12 |
| 25-42  | PMV            | 13-2-5-25-25-42  | x | 10-Dec-12 |
| 0-17   | Publichealth f | 3-1-2-0-00-17    | x | 21-Dec-12 |

|        |                |                  |   |           |
|--------|----------------|------------------|---|-----------|
| 9-67C  | Pharmacy       | 4-1-2-9-09-67C   | x | 11-Dec-12 |
| 8-67K  | Pharmacy       | 5-1-2-8-8-67K    | x | 11-Dec-12 |
| 59-43  | PMV            | 5-1-2-59-59-43   | x | 13-Dec-12 |
| 38-43  | PMV            | 15-2-3-38-38-43  | x | 13-Dec-12 |
| 28-67B | PMV            | 6-2-1-28-28-67B  | x | 14-Dec-12 |
| 31-65A | PMV            | 9-3-5-31-31-65A  | x | 12-Dec-12 |
| 5-67f  | Pharmacy       | 15-2-1-5-05-67f  | x | 14-Dec-12 |
| 38-65  | Pharmacy       | 1-3-1-38-38-65   | x | 14-Dec-12 |
| 7-64   | Pharmacy       | 2-3-2-7-07-64    | x | 10-Dec-12 |
| 2-65   | Pharmacy       | 4-2-3-2-02-65    | x | 08-Dec-12 |
| 2-65   | Pharmacy       | 5-1-2-2-02-65    | x | 10-Dec-12 |
| 31-65  | PMV            | 5-1-2-31-31-65   | x | 12-Dec-12 |
| 1-65   | Pharmacy       | 6-2-1-1-01-65    | x | 14-Dec-12 |
| 11-65  | Pharmacy       | 6-2-1-11-11-65   | x | 18-Dec-12 |
| 14-65  | Pharmacy       | 6-2-3-14-14-65   | x | 10-Dec-12 |
| 4-65A  | Pharmacy       | 7-2-4-4-04-65A   | x | 12-Dec-12 |
| 0-65   | Publichealth f | 7-3-5-0-0-65     | x | 20-Dec-12 |
| 0-65   | Publichealth f | 8-2-1-0-00-65    | x | 20-Dec-12 |
| 0-65B  | Publichealth f | 9-2-1-0-0-65B    | x | 21-Dec-12 |
| 0-65   | Publichealth f | 9-2-5-0-0-65     | x | 20-Dec-12 |
| 31-65B | PMV            | 9-3-5-31-31-65B  | x | 12-Dec-12 |
| 21-65A | PMV            | 10-3-1-21-21-65A | x | 13-Dec-12 |
| 53-65  | PMV            | 10-3-1-53-53-65  | x | 18-Dec-12 |
| 72-65  | PMV            | 10-3-1-72-72-65  | x | 15-Dec-12 |
| 12-65  | Pharmacy       | 11-2-5-12-12-65  | x | 12-Dec-12 |
| 3-65   | Pharmacy       | 12-2-5-3-03-65   | x | 12-Dec-12 |
| 16-65  | Pharmacy       | 13-2-3-16-16-65  | x | 08-Dec-12 |
| 25-64  | PMV            | 13-2-5-25-25-64  | x | 10-Dec-12 |
| 2-65   | Pharmacy       | 16-1-3-2-02-65   | x | 11-Dec-12 |
| 11-65  | Pharmacy       | 16-1-3-11-11-65  | x | 10-Dec-12 |
| 26-64  | PMV            | 16-1-3-26-26-64  | x | 12-Dec-12 |
| 1-67A  | Pharmacy       | 4-1-2-1-01-67A   | x | 10-Dec-12 |
| 1-67A  | Pharmacy       | 7-2-4-1-01-67A   | x | 13-Dec-12 |
| 27-7   | PMV            | 2-3-5-27-27-07   | x | 11-Dec-12 |
| 53-8   | PMV            | 4-1-2-53-53-08   | x | 18-Dec-12 |
| 21-08A | PMV            | 5-1-2-21-21-08A  | x | 14-Dec-12 |
| 49-8   | PMV            | 5-1-2-49-49-08   | x | 14-Dec-12 |
| 15-8   | PMV            | 6-2-1-15-15-8    | x | 17-Dec-12 |
| 26-67  | PMV            | 6-2-1-26-26-67   | x | 14-Dec-12 |
| 21-08B | PMV            | 10-3-1-21-21-08B | x | 13-Dec-12 |
| 3-8    | Pharmacy       | 12-2-5-3-03-08   | x | 12-Dec-12 |
| 4-8    | Pharmacy       | 12-2-5-4-04-08   | x | 12-Dec-12 |
| 24-8   | PMV            | 12-2-5-24-24-8   | x | 10-Dec-12 |
| 1-8    | Pharmacy       | 13-3-7-1-01-08   | x | 11-Dec-12 |
| 4-7    | Pharmacy       | 14-1-3-4-04-07   | x | 10-Dec-12 |
| 25-7   | PMV            | 14-1-3-25-25-07  | x | 14-Dec-12 |
| 7-7    | Pharmacy       | 16-1-1-7-07-07   | x | 14-Dec-12 |
| 75-7   | PMV            | 1-3-1-75-75-07   | x | 15-Dec-12 |
| 14-7   | Pharmacy       | 6-2-3-14-14-7    | x | 10-Dec-12 |
| 21-07A | PMV            | 1-3-1-21-21-07A  | x | 13-Dec-12 |

|        |                  |                  |   |           |
|--------|------------------|------------------|---|-----------|
| 63-7   | PMV              | 1-3-1-63-63-07   | x | 13-Dec-12 |
| 5-7    | PMV              | 2-3-2-5-05-07    | x | 10-Dec-12 |
| 8-7    | PMV              | 2-3-2-8-08-07    | x | 10-Dec-12 |
| 9-7    | Pharmacy         | 4-1-2-9-09-07    | x | 11-Dec-12 |
| 2-7    | Pharmacy         | 5-1-2-2-02-07    | x | 10-Dec-12 |
| 21-07B | PMV              | 5-1-2-21-21-07B  | x | 14-Dec-12 |
| 33-7   | PMV              | 5-1-2-33-33-07   | x | 12-Dec-12 |
| 59-26  | PMV              | 5-1-2-59-59-26   | x | 20-Dec-12 |
| 22-7   | PMV              | 7-2-4-22-22-7    | x | 13-Dec-12 |
| 3-7    | PMV              | 9-3-3-3-03-07    | x | 13-Dec-12 |
| 21-07C | PMV              | 14-1-3-21-21-07C | x | 12-Dec-12 |
| 12-67c | Pharmacy         | 5-2-3-12-12-67c  | x | 08-Dec-12 |
| 0-35   | Publichealth fca | 5-2-1-0-0-35     | x | 20-Dec-12 |
| 0-35A  | Publichealth fca | 9-2-1-0-0-35A    | x | 21-Dec-12 |
| 39-67  | PMV              | 3-2-4-39-39-67   | x | 12-Dec-12 |
| 77-34  | PMV              | 1-3-1-77-77-34   | x | 18-Dec-12 |
| 1-34   | Pharmacy         | 7-2-4-1-01-34    | x | 13-Dec-12 |
| 7-33   | Pharmacy         | 16-1-3-7-07-33   | x | 11-Dec-12 |
| 7-67D  | Pharmacy         | 5-1-2-7-07-67D   | x | 12-Dec-12 |
| 22-67d | Pharmacy         | 5-1-2-22-22-67d  | x | 04-Dec-12 |
| 28-67  | PMV              | 2-3-5-28-28-67   | x | 11-Dec-12 |
| 37-67E | Pharmacy         | 6-2-3-37-37-67E  | x | 12-Dec-12 |
| 28-67  | PMV              | 13-3-7-28-28-67  | x | 13-Dec-12 |
| 81-65  | Pharmacy         | 1-3-1-81-81-65   | x | 18-Dec-12 |
| 7-67b  | PMV              | 2-3-2-7-07-67b   | x | 10-Dec-12 |
| 19-64  | Pharmacy         | 4-1-2-19-19-64   | x | 14-Dec-12 |
| 11-65  | Pharmacy         | 5-1-2-11-11-65   | x | 12-Dec-12 |
| 0-65   | Publichealth fca | 5-2-1-0-0-65     | x | 20-Dec-12 |
| 1-67b  | Pharmacy         | 6-2-1-1-01-67b   | x | 14-Dec-12 |
| 11-67H | Pharmacy         | 6-2-1-11-11-67H  | x | 18-Dec-12 |
| 14-67C | Pharmacy         | 6-2-3-14-14-67C  | x | 10-Dec-12 |
| 4-65B  | Pharmacy         | 7-2-4-4-04-65B   | x | 12-Dec-12 |
| 0-65T  | Publichealth fca | 9-2-1-0-0-65T    | x | 21-Dec-12 |
| 21-65B | PMV              | 10-3-1-21-21-65B | x | 13-Dec-12 |
| 72-64  | PMV              | 10-3-1-72-72-64  | x | 15-Dec-12 |
| 16-64A | Pharmacy         | 13-2-3-16-16-64A | x | 08-Dec-12 |
| 25-64B | PMV              | 13-2-5-25-25-64B | x | 10-Dec-12 |
| 1-64A  | Pharmacy         | 14-1-1-1-01-64A  | x | 13-Dec-12 |
| 4-64A  | Pharmacy         | 14-1-3-4-04-64A  | x | 10-Dec-12 |
| 10-64  | Pharmacy         | 14-1-3-10-10-64  | x | 13-Dec-12 |
| 11-64  | Pharmacy         | 16-1-3-11-11-64  | x | 10-Dec-12 |
| 38-64  | PMV              | 1-3-1-38-38-64   | x | 14-Dec-12 |
| 60-64  | PMV              | 1-3-1-60-60-64   | x | 13-Dec-12 |
| 63-64  | PMV              | 1-3-1-63-63-64   | x | 13-Dec-12 |
| 7-67a  | PMV              | 2-3-2-7-07-67a   | x | 10-Dec-12 |
| 33-67a | PMV              | 2-3-5-33-33-67a  | x | 12-Dec-12 |
| 21-64  | PMV              | 3-2-4-21-21-64   | x | 10-Dec-12 |
| 39-64  | PMV              | 3-2-4-39-39-64   | x | 12-Dec-12 |
| 42-64  | PMV              | 3-2-4-42-42-64   | x | 13-Dec-12 |
| 0-64   | Publichealth fca | 3-3-71-0-0-64    | x | 20-Dec-12 |

|        |                |                  |   |           |
|--------|----------------|------------------|---|-----------|
| 4-64   | Pharmacy       | 4-1-2-4-04-64    | x | 12-Dec-12 |
| 18-64  | Pharmacy       | 4-1-2-18-18-64   | x | 14-Dec-12 |
| 35-64  | PMV            | 4-1-2-35-35-64   | x | 13-Dec-12 |
| 53-65  | PMV            | 4-1-2-53-53-65   | x | 18-Dec-12 |
| 0-65   | Publichealth f | 5-1-2-0-0-65     | x | 21-Dec-12 |
| 7-64   | Pharmacy       | 5-1-2-7-07-64    | x | 12-Dec-12 |
| 1-64   | Pharmacy       | 6-2-1-1-01-64    | x | 14-Dec-12 |
| 14-67E | Pharmacy       | 6-2-3-14-14-67E  | x | 10-Dec-12 |
| 25-64  | PMV            | 6-2-3-25-25-64   | x | 08-Dec-12 |
| 1-64   | Pharmacy       | 7-2-4-1-01-64    | x | 13-Dec-12 |
| 27-64  | PMV            | 7-2-4-27-27-64   | x | 12-Dec-12 |
| 0-64   | Publichealth f | 7-3-5-0-0-64     | x | 20-Dec-12 |
| 0-64   | Publichealth f | 8-2-1-0-00-64    | x | 20-Dec-12 |
| 17-64  | PMV            | 8-2-4-17-17-64   | x | 13-Dec-12 |
| 23-64  | PMV            | 8-2-4-23-23-64   | x | 13-Dec-12 |
| 44-64  | PMV            | 8-2-4-44-44-64   | x | 12-Dec-12 |
| 0-64   | Publichealth f | 9-2-1-0-0-64     | x | 21-Dec-12 |
| 8-64   | PMV            | 9-3-5-8-08-64    | x | 11-Dec-12 |
| 20-64  | PMV            | 9-3-5-20-20-64   | x | 11-Dec-12 |
| 31-64  | PMV            | 9-3-5-31-31-64   | x | 12-Dec-12 |
| 1-64   | Pharmacy       | 10-3-1-1-01-64   | x | 14-Dec-12 |
| 14-64  | Pharmacy       | 10-3-1-14-14-64  | x | 18-Dec-12 |
| 21-64  | PMV            | 10-3-1-21-21-64  | x | 13-Dec-12 |
| 43-64  | PMV            | 10-3-1-43-43-64  | x | 18-Dec-12 |
| 53-64  | PMV            | 10-3-1-53-53-64  | x | 18-Dec-12 |
| 78-64  | PMV            | 10-3-1-78-78-64  | x | 13-Dec-12 |
| 14-64  | PMV            | 11-3-7-14-14-64  | x | 11-Dec-12 |
| 4-64   | Pharmacy       | 12-2-5-4-04-64   | x | 12-Dec-12 |
| 6-64   | Pharmacy       | 12-3-7-6-06-64   | x | 11-Dec-12 |
| 16-64B | Pharmacy       | 13-2-3-16-16-64B | x | 08-Dec-12 |
| 25-64  | PMV            | 13-2-5-25-25-64  | x | 10-Dec-12 |
| 8-65   | Pharmacy       | 13-3-7-8-08-65   | x | 11-Dec-12 |
| 1-64R  | Pharmacy       | 14-1-1-1-01-64R  | x | 13-Dec-12 |
| 15-26  | PMV            | 14-1-1-15-15-26  | x | 13-Dec-12 |
| 4-64   | Pharmacy       | 14-1-3-4-4-64    | x | 10-Dec-12 |
| 4-64   | Pharmacy       | 15-2-1-4-04-64   | x | 12-Dec-12 |
| 14-64  | Pharmacy       | 15-2-1-14-14-64  | x | 17-Dec-12 |
| 30-64  | PMV            | 15-2-3-30-30-64  | x | 10-Dec-12 |
| 2-64   | Pharmacy       | 16-1-3-2-02-64   | x | 11-Dec-12 |
| 38-67  | PMV            | 1-3-1-38-38-67   | x | 14-Dec-12 |
| 6-07B  | Pharmacy       | 3-2-6-6-06-07B   | x | 19-Dec-12 |
| 19-67D | PMV            | 4-1-2-19-19-67D  | x | 14-Dec-12 |
| 20-67A | PMV            | 7-2-4-20-20-67A  | x | 10-Dec-12 |
| 26-67  | PMV            | 16-1-3-26-26-67  | x | 12-Dec-12 |
| 9-67E  | Pharmacy       | 4-1-2-9-9-67E    | x | 11-Dec-12 |
| 20-67C | PMV            | 7-2-4-20-20-67C  | x | 10-Dec-12 |
| 42-22  | PMV            | 1-3-1-42-42-22   | x | 13-Dec-12 |
| 28-22  | PMV            | 2-3-5-28-28-22   | x | 11-Dec-12 |
| 1-21   | Pharmacy       | 2-3-6-1-01-21    | x | 10-Dec-12 |
| 11-22  | Pharmacy       | 3-2-4-11-11-22   | x | 12-Dec-12 |

|        |                |                   |   |           |
|--------|----------------|-------------------|---|-----------|
| 6-22   | PMV            | 3-22-6-6-06-22    | x | 19-Dec-12 |
| 9-22   | Pharmacy       | 4-1-2-9-9-22      | x | 11-Dec-12 |
| 12-22  | Pharmacy       | 4-1-2-12-12-22    | x | 14-Dec-12 |
| 53-22  | PMV            | 4-1-2-53-53-22    | x | 18-Dec-12 |
| 8-22   | Pharmacy       | 5-1-2-8-08-22     | x | 11-Dec-12 |
| 14-22  | Pharmacy       | 6-2-3-14-14-22    | x | 10-Dec-12 |
| 37-22  | Pharmacy       | 6-2-3-37-37-22    | x | 12-Dec-12 |
| 5-22   | Pharmacy       | 10-3-1-5-05-22    | x | 13-Dec-12 |
| 12-22  | Pharmacy       | 11-2-5-12-12-22   | x | 12-Dec-12 |
| 6-22   | Pharmacy       | 12-3-7-6-06-22    | x | 11-Dec-12 |
| 16-22  | Pharmacy       | 13-2-3-16-16-22   | x | 08-Dec-12 |
| 1-22   | Pharmacy       | 14-1-1-1-01-22    | x | 13-Dec-12 |
| 15-22  | PMV            | 14-1-1-15-15-22   | x | 13-Dec-12 |
| 1-22   | Pharmacy       | 14-1-3-1-01-22    | x | 11-Dec-12 |
| 10-22  | Pharmacy       | 15-2-3-10-10-22   | x | 11-Dec-12 |
| 11-22  | Pharmacy       | 15-2-3-11-11-22   | x | 12-Dec-12 |
| 30-22  | PMV            | 15-2-3-30-30-22   | x | 10-Dec-12 |
| 38-22  | Pharmacy       | 15-2-3-38-38-22   | x | 13-Dec-12 |
| 2-22   | Pharmacy       | 16-1-3-2-02-22    | x | 11-Dec-12 |
| 14-22  | PMV            | 16-1-3-14-014-022 | x | 12-Dec-12 |
| 30-22  | PMV            | 16-1-3-30-30-22   | x | 18-Dec-12 |
| 12-20  | Pharmacy       | 1-3-1-12-12-20    | x | 13-Dec-12 |
| 13-20  | Pharmacy       | 1-3-1-13-13-20    | x | 14-Dec-12 |
| 42-20  | PMV            | 1-3-1-42-42-20    | x | 13-Dec-12 |
| 2-20   | Pharmacy       | 3-2-1-2-02-20     | x | 10-Dec-12 |
| 11-20  | PMV            | 3-2-4-11-11-20    | x | 12-Dec-12 |
| 21-20  | PMV            | 3-2-4-21-21-20    | x | 10-Dec-12 |
| 39-20  | PMV            | 3-2-4-39-39-20    | x | 12-Dec-12 |
| 6-20   | Pharmacy       | 4-1-2-6-06-20     | x | 13-Dec-12 |
| 13-20  | PMV            | 6-2-1-13-13-20    | x | 13-Dec-12 |
| 6-20   | Pharmacy       | 6-2-3-6-06-20     | x | 11-Dec-12 |
| 25-20  | PMV            | 7-2-4-25-25-20    | x | 13-Dec-12 |
| 1-21   | Pharmacy       | 9-2-2-1-01-21     | x | 18-Dec-12 |
| 5-20   | Pharmacy       | 10-3-1-5-05-20    | x | 13-Dec-12 |
| 71-21  | PMV            | 10-3-1-71-71-21   | x | 15-Dec-12 |
| 12-20  | Pharmacy       | 11-2-5-12-12-20   | x | 12-Dec-12 |
| 21-20  | PMV            | 13-2-3-21-21-20   | x | 08-Dec-12 |
| 8-20   | Pharmacy       | 13-3-7-8-08-20    | x | 11-Dec-12 |
| 28-20  | PMV            | 13-3-7-28-28-20   | x | 13-Dec-12 |
| 10-20  | Pharmacy       | 15-2-3-10-10-20   | x | 11-Dec-12 |
| 38-20  | Pharmacy       | 15-2-3-38-38-20   | x | 13-Dec-12 |
| 7-20   | Pharmacy       | 16-1-3-7-07-20    | x | 11-Dec-12 |
| 38-20  | Pharmacy       | 16-1-3-38-38-20   | x | 14-Dec-12 |
| 21-67B | PMV            | 10-3-1-21-21-67B  | x | 13-Dec-12 |
| 8-67B  | Pharmacy       | 4-1-2-8-08-67B    | x | 13-Dec-12 |
| 5-67B  | Pharmacy       | 11-2-5-5-05-67B   | x | 12-Dec-12 |
| 21-67  | PMV            | 14-1-3-21-21-67   | x | 12-Dec-12 |
| 0-35B  | Publichealth f | 9-2-1-0-0-35B     | x | 21-Dec-12 |
| 3-33   | Pharmacy       | 4-2-3-3-03-33     | x | 08-Dec-12 |
| 2-33   | Pharmacy       | 5-1-2-2-02-33     | x | 10-Dec-12 |

|        |          |                  |   |           |
|--------|----------|------------------|---|-----------|
| 21-33  | PMV      | 10-3-1-21-21-33  | x | 13-Dec-12 |
| 6-67A  | Pharmacy | 3-2-6-6-06-67A   | x | 19-Dec-12 |
| 31-67A | PMV      | 9-3-5-31-31-67A  | x | 12-Dec-12 |
| 28-21  | PMV      | 2-3-5-28-28-21   | x | 11-Dec-12 |
| 1-22b  | Pharmacy | 2-3-6-1-01-22b   | x | 10-Dec-12 |
| 13-67  | PMV      | 6-2-1-13-13-67   | x | 13-Dec-12 |
| 37-67B | Pharmacy | 6-2-3-37-37-67B  | x | 12-Dec-12 |
| 16-20  | Pharmacy | 13-2-3-16-16-20  | x | 08-Dec-12 |
| 7-22   | PMV      | 14-1-1-7-07-22   | x | 14-Dec-12 |
| 10-67B | Pharmacy | 15-2-3-10-10-67B | x | 11-Dec-12 |
| 30-67  | PMV      | 15-2-3-30-30-67  | x | 10-Dec-12 |
| 80-21  | PMV      | 1-3-1-80-80-21   | x | 18-Dec-12 |
| 1-22a  | Pharmacy | 2-3-6-1-01-22a   | x | 10-Dec-12 |
| 23-20  | Pharmacy | 4-1-2-23-23-20   | x | 10-Dec-12 |
| 3-21   | Pharmacy | 4-2-3-3-03-21    | x | 08-Dec-12 |
| 2-21   | Pharmacy | 5-1-2-2-02-21    | x | 10-Dec-12 |
| 7-21   | Pharmacy | 5-1-2-7-07-21    | x | 12-Dec-12 |
| 17-21  | Pharmacy | 5-1-2-17-17-21   | x | 18-Dec-12 |
| 7-21   | Pharmacy | 5-2-3-7-07-21    | x | 08-Dec-12 |
| 13-21  | PMV      | 6-2-1-13-13-21   | x | 13-Dec-12 |
| 9-21   | Pharmacy | 6-2-3-9-09-21    | x | 11-Dec-12 |
| 14-21  | Pharmacy | 6-2-3-14-14-21   | x | 10-Dec-12 |
| 37-21  | Pharmacy | 6-2-3-37-37-21   | x | 12-Dec-12 |
| 31-21  | PMV      | 9-3-5-31-31-21   | x | 12-Dec-12 |
| 14-21  | Pharmacy | 10-3-1-14-14-21  | x | 18-Dec-12 |
| 9-21   | Pharmacy | 13-2-5-9-09-21   | x | 10-Dec-12 |
| 3-21   | Pharmacy | 13-3-7-3-03-21   | x | 11-Dec-12 |
| 15-21  | PMV      | 14-1-1-15-15-21  | x | 13-Dec-12 |
| 1-21   | Pharmacy | 14-1-3-1-01-21   | x | 11-Dec-12 |
| 9-21   | Pharmacy | 14-1-3-9-9-21    | x | 12-Dec-12 |
| 23-21  | Pharmacy | 14-1-3-23-23-21  | x | 12-Dec-12 |
| 35-21  | PMV      | 14-1-3-35-35-21  | x | 14-Dec-12 |
| 28-22  | PMV      | 16-1-1-28-28-22  | x | 14-Dec-12 |
| 27-31T | PMV      | 16-1-3-27-27-31T | x | 12-Dec-12 |
| 30-21  | PMV      | 16-1-3-30-30-21  | x | 18-Dec-12 |
| 38-24  | Pharmacy | 16-1-3-38-38-24  | x | 14-Dec-12 |
| 13-15  | Pharmacy | 1-3-1-13-13-15   | x | 14-Dec-12 |
| 21-15  | PMV      | 1-3-1-21-21-15   | x | 13-Dec-12 |
| 9-14   | Pharmacy | 4-1-2-9-09-14    | x | 11-Dec-12 |
| 8-15   | Pharmacy | 5-1-2-8-08-15    | x | 11-Dec-12 |
| 17-15  | Pharmacy | 5-1-2-17-17-15   | x | 18-Dec-12 |
| 9-15   | Pharmacy | 6-2-3-9-09-15    | x | 11-Dec-12 |
| 12-15  | Pharmacy | 11-2-5-12-12-15  | x | 12-Dec-12 |
| 26-15  | PMV      | 11-2-5-26-26-15  | x | 10-Dec-12 |
| 38-67C | Pharmacy | 15-2-3-38-38-67C | x | 13-Dec-12 |
| 74-67a | PMV      | 1-3-1-74-74-67a  | x | 14-Dec-12 |
| 8-67A  | Pharmacy | 5-1-2-8-08-67A   | x | 11-Dec-12 |
| 4-067C | Pharmacy | 14-1-3-4-04-067C | x | 10-Dec-12 |
| 13-14  | Pharmacy | 1-3-1-13-13-14   | x | 14-Dec-12 |
| 21-14  | PMV      | 1-3-1-21-21-14   | x | 13-Dec-12 |



|        |          |                 |   |           |
|--------|----------|-----------------|---|-----------|
| 42-14  | PMV      | 1-3-1-42-42-14  | x | 13-Dec-12 |
| 1-14   | Pharmacy | 2-3-6-1-01-14   | x | 10-Dec-12 |
| 14-14  | PMV      | 3-2-4-14-14-14  | x | 12-Dec-12 |
| 2-14   | Pharmacy | 5-1-2-2-02-14   | x | 10-Dec-12 |
| 57-14  | PMV      | 5-1-2-57-57-14  | x | 14-Dec-12 |
| 11-14  | Pharmacy | 6-2-1-11-11-14  | x | 18-Dec-12 |
| 1-14   | Pharmacy | 7-2-4-1-01-14   | x | 14-Dec-12 |
| 4-14   | Pharmacy | 7-2-4-4-04-14   | x | 12-Dec-12 |
| 5-14   | Pharmacy | 8-2-4-5-05-14   | x | 11-Dec-12 |
| 2-14   | Pharmacy | 10-3-1-2-02-14  | x | 15-Dec-12 |
| 33-14  | PMV      | 10-3-1-33-33-14 | x | 15-Dec-12 |
| 6-14   | Pharmacy | 11-2-5-6-06-14  | x | 21-Dec-12 |
| 12-14  | Pharmacy | 11-2-5-12-12-14 | x | 12-Dec-12 |
| 22-14  | PMV      | 11-2-5-22-22-14 | x | 10-Dec-12 |
| 26-14  | PMV      | 11-2-5-26-26-14 | x | 10-Dec-12 |
| 6-14   | Pharmacy | 12-3-7-6-06-14  | x | 11-Dec-12 |
| 28-14  | PMV      | 13-3-7-28-28-14 | x | 13-Dec-12 |
| 33-14  | PMV      | 13-3-7-33-33-14 | x | 14-Dec-12 |
| 1-14   | Pharmacy | 14-1-1-1-01-14  | x | 13-Dec-12 |
| 20-14  | Pharmacy | 14-1-1-20-20-14 | x | 20-Dec-12 |
| 1-14   | Pharmacy | 14-1-3-1-01-14  | x | 11-Dec-12 |
| 29-14  | Pharmacy | 14-1-3-29-29-14 | x | 13-Dec-12 |
| 35-14  | PMV      | 14-1-3-35-35-14 | x | 14-Dec-12 |
| 7-14   | Pharmacy | 15-2-1-7-07-14  | x | 14-Dec-12 |
| 14-14  | PMV      | 15-2-1-14-14-14 | x | 17-Dec-12 |
| 10-14  | Pharmacy | 15-2-3-10-10-14 | x | 11-Dec-12 |
| 11-14  | Pharmacy | 15-2-3-11-11-14 | x | 12-Dec-12 |
| 15-14  | Pharmacy | 15-2-3-15-15-14 | x | 10-Dec-12 |
| 28-14  | PMV      | 15-2-3-28-28-14 | x | 08-Dec-12 |
| 38-14  | Pharmacy | 15-2-3-38-38-14 | x | 13-Dec-12 |
| 7-14   | Pharmacy | 16-1-3-7-07-14  | x | 11-Dec-12 |
| 38-14  | Pharmacy | 16-1-3-38-38-14 | x | 14-Dec-12 |
| 7-67B  | Pharmacy | 5-1-2-7-07-67B  | x | 12-Dec-12 |
| 12-39  | Pharmacy | 11-2-5-12-12-39 | x | 12-Dec-12 |
| 68-67  | PMV      | 1-3-1-68-68-67  | x | 14-Dec-12 |
| 6-67C  | Pharmacy | 3-2-6-6-06-67C  | x | 19-Dec-12 |
| 9-67F  | Pharmacy | 4-1-2-9-9-67F   | x | 11-Dec-12 |
| 19-67B | Pharmacy | 4-1-2-19-19-67B | x | 14-Dec-12 |
| 57-67c | PMV      | 5-1-2-57-57-67c | x | 14-Dec-12 |
| 31-67B | PMV      | 9-3-5-31-31-67B | x | 12-Dec-12 |
| 1-38   | Pharmacy | 7-2-4-1-01-38   | x | 13-Dec-12 |
| 29-32  | Pharmacy | 14-1-3-29-29-32 | x | 13-Dec-12 |
| 1-54   | Pharmacy | 4-1-2-1-01-54   | x | 10-Dec-12 |
| 1-54   | Pharmacy | 7-2-4-1-01-54   | x | 13-Dec-12 |
| 2-24   | Pharmacy | 5-1-2-2-02-24   | x | 10-Dec-12 |
| 8-24   | Pharmacy | 5-1-2-8-08-24   | x | 11-Dec-12 |
| 17-24  | Pharmacy | 5-1-2-17-17-24  | x | 18-Dec-12 |
| 11-67I | Pharmacy | 6-2-1-11-11-67I | x | 18-Dec-12 |
| 6-67L  | Pharmacy | 6-2-3-6-06-67L  | x | 11-Dec-12 |
| 20-24  | PMV      | 7-2-4-20-20-24  | x | 10-Dec-12 |

|        |          |                  |   |           |
|--------|----------|------------------|---|-----------|
| 12-67  | Pharmacy | 11-2-5-12-12-67  | x | 12-Dec-12 |
| 35-67  | PMV      | 14-1-3-35-35-67  | x | 14-Dec-12 |
| 29-67E | Pharmacy | 15-2-1-29-29-67E | x | 14-Dec-12 |
| 21-63  | PMV      | 10-3-1-21-21-63  | x | 13-Dec-12 |
| 1-24   | Pharmacy | 1-2-4-1-01-24    | x | 13-Dec-12 |
| 59-24  | PMV      | 1-3-1-59-59-24   | x | 11-Dec-12 |
| 4-24   | Pharmacy | 4-1-2-4-04-24    | x | 12-Dec-12 |
| 9-24   | Pharmacy | 4-1-2-9-09-24    | x | 11-Dec-12 |
| 7-24   | Pharmacy | 5-2-3-7-07-24    | x | 08-Dec-12 |
| 11-24  | Pharmacy | 6-2-1-11-11-24   | x | 18-Dec-12 |
| 6-24   | Pharmacy | 6-2-3-6-06-24    | x | 11-Dec-12 |
| 5-24   | Pharmacy | 8-2-4-5-05-24    | x | 11-Dec-12 |
| 11-24  | Pharmacy | 11-2-5-11-11-24  | x | 12-Dec-12 |
| 12-24  | Pharmacy | 11-2-5-12-12-24  | x | 12-Dec-12 |
| 6-24   | Pharmacy | 12-3-7-6-06-24   | x | 11-Dec-12 |
| 7-24   | Pharmacy | 13-3-7-7-07-24   | x | 11-Dec-12 |
| 1-24   | Pharmacy | 14-1-3-1-01-24   | x | 11-Dec-12 |
| 29-24  | Pharmacy | 15-2-1-29-29-24  | x | 14-Dec-12 |
| 10-24  | Pharmacy | 15-2-3-10-10-24  | x | 11-Dec-12 |
| 11-24  | Pharmacy | 15-2-3-11-11-24  | x | 12-Dec-12 |
| 38-24  | Pharmacy | 15-2-3-38-38-24  | x | 13-Dec-12 |
| 28-24  | Pharmacy | 16-1-1-28-28-24  | x | 14-Dec-12 |
| 38-24  | Pharmacy | 16-1-3-38-38-24  | x | 14-Dec-12 |
| 33-1   | PMV      | 2-3-5-33-33-01   | x | 12-Dec-12 |
| 9-1    | Pharmacy | 4-1-2-9-09-01    | x | 11-Dec-12 |
| 23-1   | Pharmacy | 4-1-2-23-23-01   | x | 10-Dec-12 |
| 22-1   | PMV      | 7-2-4-22-22-1    | x | 13-Dec-12 |
| 1-1    | Pharmacy | 9-2-2-1-01-01    | x | 18-Dec-12 |
| 16-1   | Pharmacy | 13-2-3-16-16-01  | x | 08-Dec-12 |
| 15-1   | PMV      | 14-1-1-15-15-01  | x | 13-Dec-12 |
| 4-1    | Pharmacy | 14-1-3-4-4-1     | x | 10-Dec-12 |
| 5-1    | Pharmacy | 14-1-3-5-05-01   | x | 11-Dec-12 |
| 38-1   | Pharmacy | 15-2-3-38-38-01  | x | 13-Dec-12 |
| 1-30   | Pharmacy | 4-1-2-1-01-30    | x | 10-Dec-12 |
| 7-30   | Pharmacy | 5-2-3-7-07-30    | x | 08-Dec-12 |
| 1-30   | Pharmacy | 13-3-7-1-01-30   | x | 11-Dec-12 |
| 27-67b | PMV      | 2-3-5-27-27-67b  | x | 11-Dec-12 |
| 9-67D  | Pharmacy | 4-1-2-9-9-67D    | x | 11-Dec-12 |
| 2-67C  | PMV      | 5-1-2-2-02-67C   | x | 10-Dec-12 |
| 10-67  | Pharmacy | 1-3-1-10-10-067  | x | 14-Dec-12 |
| 12-63  | Pharmacy | 1-3-1-12-12-63   | x | 13-Dec-12 |
| 13-63  | Pharmacy | 1-3-1-13-13-63   | x | 14-Dec-12 |
| 36-63  | PMV      | 1-3-1-36-36-63   | x | 18-Dec-12 |
| 59-63  | PMV      | 1-3-1-59-59-63   | x | 11-Dec-12 |
| 68-63  | Pharmacy | 1-3-1-68-68-63   | x | 14-Dec-12 |
| 69-63  | PMV      | 1-3-1-69-69-63   | x | 14-Dec-12 |
| 70-63  | PMV      | 1-3-1-70-70-63   | x | 15-Dec-12 |
| 76-63  | PMV      | 1-3-1-76-76-63   | x | 18-Dec-12 |
| 80-63  | PMV      | 1-3-1-80-80-63   | x | 18-Dec-12 |
| 81-63  | Pharmacy | 1-3-1-81-81-63   | x | 18-Dec-12 |

|        |          |                 |   |           |
|--------|----------|-----------------|---|-----------|
| 82-63  | PMV      | 1-3-1-82-82-63  | x | 18-Dec-12 |
| 84-63  | PMV      | 1-3-1-84-84-63  | x | 18-Dec-12 |
| 5-63   | PMV      | 2-3-2-5-05-63   | x | 10-Dec-12 |
| 7-63   | PMV      | 2-3-2-7-07-63   | x | 10-Dec-12 |
| 8-63   | PMV      | 2-3-2-8-08-63   | x | 10-Dec-12 |
| 3-63   | Pharmacy | 2-3-4-3-3-63    | x | 10-Dec-12 |
| 4-63   | Pharmacy | 2-3-5-4-04-63   | x | 11-Dec-12 |
| 25-63  | PMV      | 2-3-5-25-25-63  | x | 11-Dec-12 |
| 1-63   | Pharmacy | 2-3-6-1-01-63   | x | 10-Dec-12 |
| 2-63   | Pharmacy | 3-2-4-2-02-63   | x | 10-Dec-12 |
| 7-63   | Pharmacy | 3-2-4-7-07-63   | x | 11-Dec-12 |
| 11-63  | Pharmacy | 3-2-4-11-11-63  | x | 12-Dec-12 |
| 15-63  | PMV      | 3-2-4-15-15-63  | x | 11-Dec-12 |
| 21-63  | PMV      | 3-2-4-21-21-63  | x | 10-Dec-12 |
| 26-63  | PMV      | 3-2-4-26-26-63  | x | 14-Dec-12 |
| 43-63  | PMV      | 3-2-4-43-43-63  | x | 13-Dec-12 |
| 6-63   | PMV      | 3-2-6-6-06-63   | x | 19-Dec-12 |
| 4-63   | Pharmacy | 4-1-2-4-04-63   | x | 12-Dec-12 |
| 5-63   | Pharmacy | 4-1-2-5-5-63    | x | 13-Dec-12 |
| 8-63   | Pharmacy | 4-1-2-8-08-63   | x | 13-Dec-12 |
| 9-63   | Pharmacy | 4-1-2-9-9-63    | x | 11-Dec-12 |
| 15-63  | Pharmacy | 4-1-2-15-15-63  | x | 12-Dec-12 |
| 19-63  | Pharmacy | 4-1-2-19-19-63  | x | 14-Dec-12 |
| 23-63  | Pharmacy | 4-1-2-23-23-63  | x | 10-Dec-12 |
| 35-63  | PMV      | 4-1-2-35-35-63  | x | 13-Dec-12 |
| 36-63  | PMV      | 4-1-2-36-36-63  | x | 12-Dec-12 |
| 53-63  | PMV      | 4-1-2-53-53-63  | x | 18-Dec-12 |
| 2-63   | Pharmacy | 5-1-2-2-02-63   | x | 10-Dec-12 |
| 7-63   | Pharmacy | 5-1-2-7-07-63   | x | 12-Dec-12 |
| 8-63   | Pharmacy | 5-1-2-8-08-63   | x | 11-Dec-12 |
| 10-63  | Pharmacy | 5-1-2-10-10-63  | x | 14-Dec-12 |
| 21-63  | Pharmacy | 5-1-2-21-21-63  | x | 14-Dec-12 |
| 22-63  | Pharmacy | 5-1-2-22-22-63  | x | 04-Dec-12 |
| 30-63  | PMV      | 5-1-2-30-30-63  | x | 10-Dec-12 |
| 31-63  | PMV      | 5-1-2-31-31-63  | x | 12-Dec-12 |
| 33-63  | PMV      | 5-1-2-33-33-63  | x | 12-Dec-12 |
| 46-63  | PMV      | 5-1-2-46-46-63  | x | 14-Dec-12 |
| 49-63  | PMV      | 5-1-2-49-49-63  | x | 14-Dec-12 |
| 56-63  | PMV      | 5-1-2-56-56-63  | x | 13-Dec-12 |
| 59-63A | Pharmacy | 5-1-2-59-59-63A | x | 13-Dec-12 |
| 59-63B | Pharmacy | 5-1-2-59-59-63B | x | 20-Dec-12 |
| 7-63   | Pharmacy | 5-2-3-7-07-63   | x | 08-Dec-12 |
| 12-63  | Pharmacy | 5-2-3-12-12-63  | x | 08-Dec-12 |
| 1-63   | Pharmacy | 6-2-1-1-01-63   | x | 14-Dec-12 |
| 13-63  | PMV      | 6-2-1-13-13-63  | x | 13-Dec-12 |
| 15-63  | PMV      | 6-2-1-15-15-63  | x | 17-Dec-12 |
| 28-63  | Pharmacy | 6-2-1-28-28-63  | x | 14-Dec-12 |
| 1-63   | Pharmacy | 6-2-3-1-01-63   | x | 12-Dec-12 |
| 14-63  | Pharmacy | 6-2-3-14-14-63  | x | 10-Dec-12 |
| 25-63  | PMV      | 6-2-3-25-25-63  | x | 08-Dec-12 |

|        |          |                 |   |           |
|--------|----------|-----------------|---|-----------|
| 37-63  | PMV      | 6-2-3-37-37-63  | x | 12-Dec-12 |
| 1-63   | Pharmacy | 7-2-4-1-01-63   | x | 13-Dec-12 |
| 22-63  | PMV      | 7-2-4-22-22-63  | x | 13-Dec-12 |
| 8-63   | Pharmacy | 8-2-1-8-08-63   | x | 10-Dec-12 |
| 5-63A  | Pharmacy | 8-2-4-5-05-63A  | x | 11-Dec-12 |
| 5-063B | Pharmacy | 8-2-4-5-05-063B | x | 13-Dec-12 |
| 10-63  | Pharmacy | 8-2-4-10-10-63  | x | 12-Dec-12 |
| 16-63  | PMV      | 8-2-4-16-16-63  | x | 13-Dec-12 |
| 17-63  | PMV      | 8-2-4-17-17-63  | x | 13-Dec-12 |
| 23-63  | PMV      | 8-2-4-23-23-63  | x | 13-Dec-12 |
| 33-63  | PMV      | 8-2-4-33-33-63  | x | 13-Dec-12 |
| 44-63  | PMV      | 8-2-4-44-44-63  | x | 12-Dec-12 |
| 1-63   | Pharmacy | 9-2-2-1-01-63   | x | 18-Dec-12 |
| 7-63   | PMV      | 9-2-2-7-07-63   | x | 18-Dec-12 |
| 11-63  | PMV      | 9-3-5-11-11-63  | x | 11-Dec-12 |
| 16-63  | PMV      | 9-3-5-16-16-63  | x | 12-Dec-12 |
| 19-63  | PMV      | 9-3-5-19-19-63  | x | 11-Dec-12 |
| 1-63   | Pharmacy | 10-3-1-1-01-63  | x | 14-Dec-12 |
| 5-63   | Pharmacy | 10-3-1-5-05-63  | x | 13-Dec-12 |
| 14-63  | Pharmacy | 10-3-1-14-14-63 | x | 18-Dec-12 |
| 15-63  | Pharmacy | 10-3-1-15-15-63 | x | 10-Dec-12 |
| 20-63  | PMV      | 10-3-1-20-20-63 | x | 13-Dec-12 |
| 25-63  | PMV      | 10-3-1-25-25-63 | x | 15-Dec-12 |
| 33-63  | Pharmacy | 10-3-1-33-33-63 | x | 15-Dec-12 |
| 37-63  | PMV      | 10-3-1-37-37-63 | x | 11-Dec-12 |
| 53-63  | PMV      | 10-3-1-53-53-63 | x | 18-Dec-12 |
| 65-63  | PMV      | 10-3-1-65-65-63 | x | 14-Dec-12 |
| 79-63  | PMV      | 10-3-1-79-79-63 | x | 11-Dec-12 |
| 1-63   | Pharmacy | 11-2-5-1-01-63  | x | 13-Dec-12 |
| 5-63   | Pharmacy | 11-2-5-5-05-63  | x | 12-Dec-12 |
| 22-63  | PMV      | 11-2-5-22-22-63 | x | 10-Dec-12 |
| 26-63  | PMV      | 11-2-5-26-26-63 | x | 10-Dec-12 |
| 14-63  | PMV      | 11-3-7-14-14-63 | x | 11-Dec-12 |
| 15-63  | PMV      | 11-3-7-15-15-63 | x | 11-Dec-12 |
| 24-63  | PMV      | 11-3-7-24-24-63 | x | 11-Dec-12 |
| 27-63  | PMV      | 11-3-7-27-27-63 | x | 11-Dec-12 |
| 2-63   | Pharmacy | 12-2-5-02-02-63 | x | 12-Dec-12 |
| 10-63  | Pharmacy | 12-2-5-10-10-63 | x | 12-Dec-12 |
| 16-63  | PMV      | 12-2-5-16-16-63 | x | 10-Dec-12 |
| 24-63  | PMV      | 12-2-5-24-24-63 | x | 10-Dec-12 |
| 6-63   | Pharmacy | 12-3-7-6-06-63  | x | 11-Dec-12 |
| 23-63  | PMV      | 12-3-7-23-23-63 | x | 11-Dec-12 |
| 16-63  | Pharmacy | 13-2-3-16-16-63 | x | 08-Dec-12 |
| 21-63  | PMV      | 13-2-3-21-21-63 | x | 08-Dec-12 |
| 25-63  | PMV      | 13-2-5-25-25-63 | x | 10-Dec-12 |
| 1-63   | Pharmacy | 13-3-7-1-01-63  | x | 11-Dec-12 |
| 4-63   | Pharmacy | 13-3-7-4-04-63  | x | 11-Dec-12 |
| 7-63   | Pharmacy | 13-3-7-7-07-63  | x | 11-Dec-12 |
| 8-63   | Pharmacy | 13-3-7-8-08-63  | x | 11-Dec-12 |
| 28-63  | PMV      | 13-3-7-28-28-63 | x | 13-Dec-12 |

|        |          |                   |   |           |
|--------|----------|-------------------|---|-----------|
| 31-63  | PMV      | 13-3-7-31-31-63   | x | 14-Dec-12 |
| 32-63  | PMV      | 13-3-7-32-32-63   | x | 14-Dec-12 |
| 33-63  | PMV      | 13-3-7-33-33-63   | x | 14-Dec-12 |
| 1-63   | Pharmacy | 14-1-1-1-01-63    | x | 13-Dec-12 |
| 5-63   | PMV      | 14-1-1-5-05-63    | x | 14-Dec-12 |
| 6-63   | PMV      | 14-1-1-6-06-63    | x | 14-Dec-12 |
| 7-63   | PMV      | 14-1-1-7-07-63    | x | 14-Dec-12 |
| 15-63  | PMV      | 14-1-1-15-15-63   | x | 13-Dec-12 |
| 16-63  | PMV      | 14-1-1-16-16-63   | x | 13-Dec-12 |
| 18-63  | PMV      | 14-1-1-18-18-63   | x | 14-Dec-12 |
| 20-63  | Pharmacy | 14-1-1-20-20-63   | x | 20-Dec-12 |
| 5-63   | Pharmacy | 14-1-3-5-05-63    | x | 11-Dec-12 |
| 9-63   | Pharmacy | 14-1-3-9-9-63     | x | 12-Dec-12 |
| 21-63  | PMV      | 14-1-3-21-21-63   | x | 12-Dec-12 |
| 23-63  | PMV      | 14-1-3-23-23-63   | x | 12-Dec-12 |
| 25-63  | Pharmacy | 14-1-3-25-25-63   | x | 14-Dec-12 |
| 32-63  | Pharmacy | 14-1-3-32-32-63   | x | 14-Dec-12 |
| 35-63  | Pharmacy | 14-1-3-35-35-63   | x | 14-Dec-12 |
| 4-63   | Pharmacy | 15-2-1-4-04-63    | x | 12-Dec-12 |
| 5-63   | Pharmacy | 15-2-1-5-05-63    | x | 14-Dec-12 |
| 7-63   | Pharmacy | 15-2-1-7-07-63    | x | 14-Dec-12 |
| 14-63  | PMV      | 15-2-1-14-14-63   | x | 17-Dec-12 |
| 10-63  | Pharmacy | 15-2-3-10-10-63   | x | 11-Dec-12 |
| 15-63  | Pharmacy | 15-2-3-15-15-63   | x | 10-Dec-12 |
| 20-63  | PMV      | 15-2-3-20-20-63   | x | 12-Dec-12 |
| 24-63  | PMV      | 15-2-3-24-24-63   | x | 11-Dec-12 |
| 26-63  | PMV      | 15-2-3-26-26-63   | x | 08-Dec-12 |
| 30-63  | PMV      | 15-2-3-30-30-63   | x | 10-Dec-12 |
| 34-63  | PMV      | 15-2-3-34-34-63   | x | 08-Dec-12 |
| 38-63  | Pharmacy | 15-2-3-38-38-63   | x | 13-Dec-12 |
| 17-63  | PMV      | 16-1-1-17-17-63   | x | 14-Dec-12 |
| 7-63   | Pharmacy | 16-1-3-7-07-63    | x | 11-Dec-12 |
| 11-63  | Pharmacy | 16-1-3-11-11-63   | x | 10-Dec-12 |
| 14-63  | PMV      | 16-1-3-14-014-063 | x | 12-Dec-12 |
| 26-63  | PMV      | 16-1-3-26-26-63   | x | 12-Dec-12 |
| 30-63  | PMV      | 16-1-3-30-30-63   | x | 18-Dec-12 |
| 31-63  | Pharmacy | 16-1-3-31-31-63   | x | 18-Dec-12 |
| 38-63  | Pharmacy | 16-1-3-38-38-63   | x | 14-Dec-12 |
| 53-67E | PMV      | 4-1-2-53-53-67E   | x | 18-Dec-12 |
| 21-67b | Pharmacy | 5-1-2-2-21-67b    | x | 10-Dec-12 |
| 8-67B  | Pharmacy | 5-1-2-8-08-67B    | x | 11-Dec-12 |
| 14-67  | Pharmacy | 10-3-1-14-14-67   | x | 18-Dec-12 |
| 22-67  | PMV      | 11-2-5-22-22-67   | x | 10-Dec-12 |
| 4-67A  | Pharmacy | 15-2-1-4-04-67A   | x | 12-Dec-12 |
| 4-67   | Pharmacy | 4-1-2-4-04-67     | x | 12-Dec-12 |
| 9-67G  | Pharmacy | 4-1-2-9-9-67G     | x | 11-Dec-12 |
| 53-67F | PMV      | 4-1-2-53-53-67F   | x | 18-Dec-12 |
| 8-67E  | Pharmacy | 5-1-2-8-08-67E    | x | 11-Dec-12 |
| 12-67b | Pharmacy | 5-2-3-12-12-67b   | x | 08-Dec-12 |
| 17-67B | PMV      | 15-2-1-17-17-67B  | x | 14-Dec-12 |

|        |          |                  |   |           |
|--------|----------|------------------|---|-----------|
| 59-67a | PMV      | 1-3-1-59-59-67a  | x | 11-Dec-12 |
| 7-67   | Pharmacy | 13-3-7-7-07-67   | x | 11-Dec-12 |
| 21-67C | Pharmacy | 3-2-4-21-21-67C  | x | 10-Dec-12 |
| 11-67E | Pharmacy | 6-2-1-11-11-67E  | x | 18-Dec-12 |
| 28-67C | Pharmacy | 6-2-1-28-28-67C  | x | 14-Dec-12 |
| 53-67G | PMV      | 4-1-2-53-53-67G  | x | 18-Dec-12 |
| 8-67F  | Pharmacy | 5-1-2-8-08-67F   | x | 11-Dec-12 |
| 3-67B  | Pharmacy | 13-3-7-3-03-67B  | x | 11-Dec-12 |
| 18-67  | PMV      | 14-1-1-18-18-67  | x | 14-Dec-12 |
| 38-67F | Pharmacy | 15-2-3-38-38-67F | x | 13-Dec-12 |
| 8-67A  | Pharmacy | 8-2-1-8-08-67A   | x | 10-Dec-12 |
| 2-67A  | PMV      | 5-1-2-2-02-67A   | x | 10-Dec-12 |
| 1-67   | Pharmacy | 14-1-3-1-01-067  | x | 11-Dec-12 |
| 5-67C  | Pharmacy | 11-2-5-5-05-67C  | x | 12-Dec-12 |
| 29-67D | Pharmacy | 15-2-1-29-29-67D | x | 14-Dec-12 |
| 26-67B | PMV      | 15-2-3-26-26-67B | x | 08-Dec-12 |
| 9-67H  | Pharmacy | 4-1-2-9-09-67H   | x | 11-Dec-12 |
| 12-67a | Pharmacy | 5-2-3-12-12-67a  | x | 08-Dec-12 |
| 1-67B  | Pharmacy | 6-2-3-1-01-67B   | x | 12-Dec-12 |
| 6-67C  | Pharmacy | 6-2-3-6-06-67C   | x | 11-Dec-12 |
| 10-57  | Pharmacy | 1-3-1-10-10-57   | x | 14-Dec-12 |
| 13-57  | Pharmacy | 1-3-1-13-13-57   | x | 14-Dec-12 |
| 38-57  | PMV      | 1-3-1-38-38-57   | x | 14-Dec-12 |
| 42-57  | PMV      | 1-3-1-42-42-57   | x | 13-Dec-12 |
| 59-57  | PMV      | 1-3-1-59-59-57   | x | 11-Dec-12 |
| 75-57  | PMV      | 1-3-1-75-75-57   | x | 15-Dec-12 |
| 83-57  | PMV      | 1-3-1-83-83-57   | x | 18-Dec-12 |
| 84-57  | PMV      | 1-3-1-84-84-57   | x | 18-Dec-12 |
| 5-57   | PMV      | 2-3-2-5-5-57     | x | 10-Dec-12 |
| 30-57  | PMV      | 2-3-5-30-30-57   | x | 11-Dec-12 |
| 2-54   | Pharmacy | 3-2-4-2-02-54    | x | 10-Dec-12 |
| 7-57   | Pharmacy | 3-2-4-7-07-57    | x | 11-Dec-12 |
| 8-57   | Pharmacy | 3-2-4-8-08-57    | x | 11-Dec-12 |
| 13-57  | PMV      | 3-2-4-13-13-57   | x | 13-Dec-12 |
| 15-57  | PMV      | 3-2-4-15-15-57   | x | 11-Dec-12 |
| 21-57  | PMV      | 3-2-4-21-21-57   | x | 10-Dec-12 |
| 6-57   | Pharmacy | 3-2-6-6-06-57    | x | 19-Dec-12 |
| 15-57  | Pharmacy | 4-1-2-15-15-57   | x | 12-Dec-12 |
| 19-57  | Pharmacy | 4-1-2-19-19-57   | x | 14-Dec-12 |
| 36-57  | PMV      | 4-1-2-36-36-57   | x | 12-Dec-12 |
| 17-57  | Pharmacy | 5-1-2-17-17-57   | x | 18-Dec-12 |
| 57-57  | PMV      | 5-1-2-57-57-57   | x | 14-Dec-12 |
| 59-57  | Pharmacy | 5-1-2-59-59-57   | x | 13-Dec-12 |
| 7-57   | Pharmacy | 5-2-3-7-07-57    | x | 08-Dec-12 |
| 12-57  | Pharmacy | 5-2-3-12-12-57   | x | 08-Dec-12 |
| 15-57  | PMV      | 6-2-1-15-15-57   | x | 17-Dec-12 |
| 28-57  | Pharmacy | 6-2-1-28-28-57   | x | 14-Dec-12 |
| 1-57   | Pharmacy | 6-2-3-1-01-57    | x | 12-Dec-12 |
| 25-57  | PMV      | 6-2-3-25-25-57   | x | 08-Dec-12 |
| 31-57  | PMV      | 6-2-3-31-31-57   | x | 10-Dec-12 |

|        |          |                 |   |           |
|--------|----------|-----------------|---|-----------|
| 37-57  | Pharmacy | 6-2-3-37-37-57  | x | 12-Dec-12 |
| 4-57   | Pharmacy | 7-2-4-4-04-57   | x | 12-Dec-12 |
| 22-57B | PMV      | 7-2-4-22-22-57B | x | 13-Dec-12 |
| 25-27  | PMV      | 7-2-4-25-25-27  | x | 13-Dec-12 |
| 16-57  | PMV      | 8-2-4-16-16-57  | x | 13-Dec-12 |
| 1-57   | Pharmacy | 9-2-2-1-01-57   | x | 18-Dec-12 |
| 11-57  | PMV      | 9-3-5-19-11-57  | x | 11-Dec-12 |
| 20-57  | PMV      | 9-3-5-20-20-57  | x | 11-Dec-12 |
| 5-1    | Pharmacy | 10-3-1-5-05-01  | x | 13-Dec-12 |
| 8-57   | Pharmacy | 10-3-1-8-08-57  | x | 18-Dec-12 |
| 14-57  | Pharmacy | 10-3-1-14-14-57 | x | 18-Dec-12 |
| 20-57  | PMV      | 10-3-1-20-20-57 | x | 13-Dec-12 |
| 33-57  | Pharmacy | 10-3-1-33-33-57 | x | 15-Dec-12 |
| 66-1   | PMV      | 10-3-1-66-66-01 | x | 14-Dec-12 |
| 71-57  | Pharmacy | 10-3-1-71-71-57 | x | 15-Dec-12 |
| 78-1   | PMV      | 10-3-1-78-78-01 | x | 13-Dec-12 |
| 79-57  | PMV      | 10-3-1-79-79-57 | x | 11-Dec-12 |
| 1-57   | Pharmacy | 11-2-5-1-01-57  | x | 13-Dec-12 |
| 5-57   | Pharmacy | 11-2-5-5-05-57  | x | 12-Dec-12 |
| 11-57  | Pharmacy | 11-2-5-11-11-57 | x | 12-Dec-12 |
| 22-57  | PMV      | 11-2-5-22-22-57 | x | 10-Dec-12 |
| 26-57  | PMV      | 11-2-5-26-26-57 | x | 10-Dec-12 |
| 18-57  | PMV      | 12-3-7-18-18-57 | x | 11-Dec-12 |
| 16-57  | Pharmacy | 13-2-3-16-16-57 | x | 08-Dec-12 |
| 9-57   | Pharmacy | 13-2-5-9-09-57  | x | 10-Dec-12 |
| 1-57   | Pharmacy | 13-3-7-1-01-57  | x | 11-Dec-12 |
| 33-57  | PMV      | 13-3-7-33-33-57 | x | 14-Dec-12 |
| 6-57   | PMV      | 14-1-1-6-06-57  | x | 14-Dec-12 |
| 20-57  | Pharmacy | 14-1-1-20-20-57 | x | 20-Dec-12 |
| 1-57   | Pharmacy | 14-1-3-1-01-57  | x | 11-Dec-12 |
| 4-27   | Pharmacy | 14-1-3-4-4-27   | x | 10-Dec-12 |
| 5-37   | Pharmacy | 14-1-3-5-05-37  | x | 11-Dec-12 |
| 29-57  | Pharmacy | 14-1-3-29-29-57 | x | 13-Dec-12 |
| 35-57  | Pharmacy | 14-1-3-35-35-57 | x | 14-Dec-12 |
| 5-57   | Pharmacy | 15-2-1-5-05-57  | x | 14-Dec-12 |
| 7-57   | Pharmacy | 15-2-1-7-07-57  | x | 14-Dec-12 |
| 19-57  | PMV      | 15-2-1-19-19-57 | x | 18-Dec-12 |
| 29-57  | PMV      | 15-2-1-29-29-57 | x | 14-Dec-12 |
| 10-57  | Pharmacy | 15-2-3-10-10-57 | x | 11-Dec-12 |
| 11-57  | Pharmacy | 15-2-3-11-11-57 | x | 12-Dec-12 |
| 20-57  | PMV      | 15-2-3-20-20-57 | x | 12-Dec-12 |
| 30-57  | PMV      | 15-2-3-30-30-57 | x | 10-Dec-12 |
| 38-57  | PMV      | 15-2-3-38-38-57 | x | 13-Dec-12 |
| 7-57   | PMV      | 16-1-1-7-07-57  | x | 14-Dec-12 |
| 2-57   | Pharmacy | 16-1-3-2-02-57  | x | 11-Dec-12 |
| 6-57   | Pharmacy | 16-1-3-6-06-057 | x | 12-Dec-12 |
| 27-57  | PMV      | 16-1-3-27-27-57 | x | 12-Dec-12 |
| 30-57  | PMV      | 16-1-3-30-30-57 | x | 18-Dec-12 |
| 31-57  | Pharmacy | 16-1-3-31-31-57 | x | 18-Dec-12 |
| 38-57  | Pharmacy | 16-1-3-38-38-57 | x | 14-Dec-12 |

|         |          |                   |   |           |
|---------|----------|-------------------|---|-----------|
| 10-67   | Pharmacy | 1-3-1-10-10-067   | x | 14-Dec-12 |
| 7-67F   | Pharmacy | 5-1-2-7-7-67F     | x | 12-Dec-12 |
| 11-67B  | Pharmacy | 6-2-1-11-11-67B   | x | 18-Dec-12 |
| 1-67D   | Pharmacy | 11-2-5-1-01-67D   | x | 13-Dec-12 |
| 1-67    | Pharmacy | 13-3-7-1-01-67    | x | 11-Dec-12 |
| 33-67   | PMV      | 13-3-7-33-33-67   | x | 14-Dec-12 |
| 4-67    | Pharmacy | 1-3-1-4-04-67     | x | 10-Dec-12 |
| 6-67B   | PMV      | 9-2-2-6-06-67B    | x | 18-Dec-12 |
| 21-67A  | PMV      | 10-3-1-21-21-67A  | x | 13-Dec-12 |
| 24-67b  | PMV      | 11-3-7-24-24-67b  | x | 11-Dec-12 |
| 16-67   | PMV      | 12-2-5-16-16-67   | x | 10-Dec-12 |
| 39-67   | PMV      | 1-3-1-39-39-67    | x | 14-Dec-12 |
| 74-67c  | PMV      | 1-3-1-74-74-67c   | x | 14-Dec-12 |
| 6-67D   | PMV      | 3-2-6-6-06-67D    | x | 19-Dec-12 |
| 28-67E  | Pharmacy | 6-2-1-28-28-67E   | x | 14-Dec-12 |
| 22-67   | PMV      | 11-2-5-22-22-67   | x | 10-Dec-12 |
| 3-67    | Pharmacy | 12-2-5-3-3-67     | x | 12-Dec-12 |
| 9-67    | Pharmacy | 13-3-7-9-09-67    | x | 11-Dec-12 |
| 4-67B   | Pharmacy | 15-2-1-4-04-67B   | x | 12-Dec-12 |
| 5-67e   | Pharmacy | 15-2-1-5-05-67e   | x | 14-Dec-12 |
| 21-30   | PMV      | 3-2-4-21-21-30    | x | 10-Dec-12 |
| 15-28   | Pharmacy | 4-1-2-15-15-28    | x | 12-Dec-12 |
| 53-28   | PMV      | 4-1-2-53-53-28    | x | 18-Dec-12 |
| 22-28   | Pharmacy | 5-1-2-22-22-28    | x | 04-Dec-12 |
| 11-28   | Pharmacy | 6-2-1-11-11-28    | x | 18-Dec-12 |
| 9-28    | Pharmacy | 14-1-3-9-9-28     | x | 12-Dec-12 |
| 29-28   | PMV      | 15-2-1-29-29-28   | x | 14-Dec-12 |
| 28-28   | PMV      | 15-2-3-28-28-28   | x | 08-Dec-12 |
| 7-28    | Pharmacy | 16-1-3-7-07-28    | x | 11-Dec-12 |
| 11-28   | Pharmacy | 16-1-3-11-11-28   | x | 10-Dec-12 |
| 38-28   | PMV      | 16-1-3-38-38-28   | x | 14-Dec-12 |
| 59-67A  | Pharmacy | 5-1-2-59-59-67A   | x | 13-Dec-12 |
| 11-67A  | Pharmacy | 6-2-1-11-11-67A   | x | 18-Dec-12 |
| 37-67A  | Pharmacy | 6-2-3-37-37-67A   | x | 12-Dec-12 |
| 11-67C  | Pharmacy | 6-2-1-11-11-67C   | x | 18-Dec-12 |
| 14-067A | Pharmacy | 16-1-3-4-014-067A | x | 12-Dec-12 |
| 8-12    | Pharmacy | 4-1-2-8-08-12     | x | 13-Dec-12 |
| 17-12   | Pharmacy | 5-1-2-17-17-12    | x | 18-Dec-12 |
| 2-12    | Pharmacy | 9-2-2-2-02-12     | x | 18-Dec-12 |
| 16-12   | PMV      | 9-3-5-16-16-12    | x | 12-Dec-12 |
| 28-12   | PMV      | 16-1-1-28-28-12   | x | 14-Dec-12 |
| 60-67A  | PMV      | 1-3-1-60-60-67A   | x | 11-Dec-12 |
| 60-67D  | PMV      | 1-3-1-60-60-67D   | x | 13-Dec-12 |
| 7-67A   | Pharmacy | 5-1-2-7-07-67A    | x | 12-Dec-12 |
| 55-67A  | PMV      | 5-1-2-55-55-67A   | x | 13-Dec-12 |
| 59-67B  | Pharmacy | 5-1-2-59-59-67B   | x | 13-Dec-12 |
| 15-67   | PMV      | 14-1-1-15-15-67   | x | 13-Dec-12 |
| 9-67    | Pharmacy | 14-1-3-9-9-67     | x | 12-Dec-12 |
| 38-67G  | Pharmacy | 15-2-3-38-38-67G  | x | 13-Dec-12 |
| 7-67    | Pharmacy | 16-1-3-7-07-67    | x | 11-Dec-12 |



|        |                |                  |   |           |
|--------|----------------|------------------|---|-----------|
| 25-67  | PMV            | 13-2-5-25-25-67  | x | 10-Dec-12 |
| 21-67W | PMV            | 3-2-4-21-21-67W  | x | 10-Dec-12 |
| 9-48   | Pharmacy       | 4-1-2-9-09-48    | x | 11-Dec-12 |
| 19-67A | Pharmacy       | 4-1-2-19-19-67A  | x | 14-Dec-12 |
| 55-67B | PMV            | 5-1-2-55-55-67B  | x | 13-Dec-12 |
| 0-67   | Publichealth f | 5-2-1-0-0-67     | x | 20-Dec-12 |
| 37-67D | PMV            | 6-2-3-37-37-67D  | x | 12-Dec-12 |
| 1-48   | Pharmacy       | 9-2-2-1-01-48    | x | 18-Dec-12 |
| 8-48   | PMV            | 9-3-6-8-08-48    | x | 13-Dec-12 |
| 14-67C | PMV            | 15-2-1-14-14-67C | x | 17-Dec-12 |
| 11-48  | Pharmacy       | 16-1-3-11-11-48  | x | 10-Dec-12 |
| 59-67C | PMV            | 5-1-2-59-59-67C  | x | 13-Dec-12 |
| 53-67D | PMV            | 4-1-2-53-53-67D  | x | 18-Dec-12 |
| 7-67   | Pharmacy       | 5-1-2-7-7-67     | x | 12-Dec-12 |
| 14-67A | PMV            | 6-2-3-14-14-67A  | x | 10-Dec-12 |
| 14-67D | PMV            | 15-2-1-14-14-67D | x | 17-Dec-12 |
| 4-56   | Pharmacy       | 2-3-5-4-04-56    | x | 11-Dec-12 |
| 11-67G | Pharmacy       | 6-2-1-11-11-67G  | x | 18-Dec-12 |
| 8-56   | PMV            | 9-3-5-8-8-56     | x | 11-Dec-12 |
| 8-56   | Pharmacy       | 13-3-7-8-08-56   | x | 11-Dec-12 |
| 11-67  | Pharmacy       | 16-1-3-11-11-67  | x | 10-Dec-12 |
| 8-67J  | Pharmacy       | 5-1-2-8-08-67J   | x | 11-Dec-12 |
| 38-67D | PMV            | 15-2-3-38-38-67D | x | 13-Dec-12 |
| 14-67D | Pharmacy       | 6-2-3-14-14-67D  | x | 10-Dec-12 |
| 60-51B | PMV            | 1-3-1-60-60-51B  | x | 13-Dec-12 |
| 6-50   | PMV            | 2-3-2-6-06-50    | x | 10-Dec-12 |
| 7-50   | PMV            | 2-3-2-7-07-50    | x | 10-Dec-12 |
| 1-50   | Pharmacy       | 2-3-6-1-01-50    | x | 10-Dec-12 |
| 13-50  | PMV            | 3-2-4-13-13-50   | x | 13-Dec-12 |
| 21-50  | PMV            | 3-2-4-21-21-50   | x | 10-Dec-12 |
| 9-50   | Pharmacy       | 4-1-2-9-09-50    | x | 11-Dec-12 |
| 19-50  | Pharmacy       | 4-1-2-19-19-50   | x | 14-Dec-12 |
| 1-50   | Pharmacy       | 6-2-3-1-01-50    | x | 12-Dec-12 |
| 11-50  | Pharmacy       | 6-2-1-11-11-50   | x | 18-Dec-12 |
| 15-50  | PMV            | 6-2-1-15-15-50   | x | 17-Dec-12 |
| 28-50  | PMV            | 6-2-1-28-28-50   | x | 14-Dec-12 |
| 31-50  | PMV            | 6-2-3-31-31-50   | x | 10-Dec-12 |
| 36-49  | PMV            | 6-2-3-36-36-49   | x | 08-Dec-12 |
| 16-50  | PMV            | 8-2-4-16-16-50   | x | 13-Dec-12 |
| 44-50  | PMV            | 8-2-4-44-44-50   | x | 12-Dec-12 |
| 1-50   | Pharmacy       | 9-2-2-1-01-50    | x | 18-Dec-12 |
| 10-50  | PMV            | 9-2-2-10-10-50   | x | 18-Dec-12 |
| 11-50  | PMV            | 9-2-2-11-11-50   | x | 18-Dec-12 |
| 16-50  | PMV            | 9-3-5-16-16-50   | x | 12-Dec-12 |
| 19-50B | PMV            | 9-3-5-19-19-50B  | x | 11-Dec-12 |
| 8-50   | PMV            | 9-3-6-8-08-50    | x | 13-Dec-12 |
| 6-49   | PMV            | 14-1-1-6-06-49   | x | 14-Dec-12 |
| 15-63  | PMV            | 14-1-1-15-15-63  | x | 13-Dec-12 |
| 13-49  | PMV            | 14-1-3-10-13-49  | x | 13-Dec-12 |
| 5-50   | Pharmacy       | 14-1-3-5-05-50   | x | 11-Dec-12 |

|        |                |                  |   |           |
|--------|----------------|------------------|---|-----------|
| 9-50   | Pharmacy       | 14-1-3-9-9-50    | x | 12-Dec-12 |
| 29-50  | PMV            | 15-2-1-29-29-50  | x | 14-Dec-12 |
| 10-50  | Pharmacy       | 15-2-3-10-10-50  | x | 11-Dec-12 |
| 20-50  | PMV            | 15-2-3-20-20-50  | x | 12-Dec-12 |
| 28-50  | PMV            | 16-1-1-28-28-50  | x | 14-Dec-12 |
| 11-50  | PMV            | 16-1-3-11-11-50  | x | 10-Dec-12 |
| 2-50   | Pharmacy       | 16-1-3-2-02-50   | x | 11-Dec-12 |
| 31-50  | PMV            | 16-1-3-31-31-50  | x | 18-Dec-12 |
| 38-50  | PMV            | 16-1-3-38-38-50  | x | 14-Dec-12 |
| 4-60   | Pharmacy       | 4-1-2-4-04-60    | x | 12-Dec-12 |
| 19-60  | PMV            | 4-1-2-19-19-60   | x | 14-Dec-12 |
| 22-67e | PMV            | 5-1-2-22-22-67e  | x | 04-Dec-12 |
| 30-60  | PMV            | 15-2-3-30-30-60  | x | 10-Dec-12 |
| 9-37   | Pharmacy       | 4-1-2-9-9-37     | x | 11-Dec-12 |
| 4-37   | Pharmacy       | 7-2-4-4-04-37    | x | 12-Dec-12 |
| 0-37   | Publichealth f | 9-2-1-0-0-37     | x | 21-Dec-12 |
| 1-37   | Pharmacy       | 11-2-5-1-01-37   | x | 13-Dec-12 |
| 4-37   | Pharmacy       | 12-2-5-4-04-37   | x | 12-Dec-12 |
| 6-67B  | Pharmacy       | 6-2-3-6-06-67B   | x | 11-Dec-12 |
| 53-67A | PMV            | 4-1-2-53-53-67A  | x | 18-Dec-12 |
| 21-67B | PMV            | 3-2-4-21-21-67B  | x | 10-Dec-12 |
| 11-67  | Pharmacy       | 5-1-2-11-11-67   | x | 12-Dec-12 |
| 32-67d | PMV            | 13-3-7-32-32-67d | x | 14-Dec-12 |
| 5-60   | Pharmacy       | 15-2-1-5-05-60   | x | 14-Dec-12 |
| 60-67C | PMV            | 1-3-1-60-60-67C  | x | 11-Dec-12 |
| 27-67a | PMV            | 2-3-5-27-27-67a  | x | 11-Dec-12 |
| 15-67  | PMV            | 6-2-1-15-15-67   | x | 17-Dec-12 |
| 1-17   | Pharmacy       | 9-2-2-1-01-17    | x | 18-Dec-12 |
| 7-17a  | PMV            | 9-2-2-7-07-17a   | x | 18-Dec-12 |
| 10-17b | PMV            | 9-2-2-10-10-17b  | x | 18-Dec-12 |
| 20-17  | PMV            | 9-3-5-20-20-17   | x | 11-Dec-12 |
| 8-17B  | Pharmacy       | 9-3-6-8-08-17B   | x | 13-Dec-12 |
| 15-17b | PMV            | 14-1-1-15-15-17b | x | 13-Dec-12 |
| 1-17B  | Pharmacy       | 14-1-3-1-01-17B  | x | 11-Dec-12 |
| 23-17  | PMV            | 14-1-3-23-23-17  | x | 12-Dec-12 |
| 35-17b | PMV            | 14-1-3-35-35-17b | x | 14-Dec-12 |
| 38-67E | PMV            | 15-2-3-38-38-67E | x | 13-Dec-12 |
| 28-17B | PMV            | 16-1-1-28-28-17B | x | 14-Dec-12 |
| 11-17  | Pharmacy       | 16-1-3-11-11-17  | x | 10-Dec-12 |
| 31-17B | PMV            | 16-1-3-31-31-17B | x | 18-Dec-12 |
| 10-67b | PMV            | 9-2-2-10-10-67b  | x | 18-Dec-12 |
| 28-67c | PMV            | 15-2-3-28-28-67c | x | 08-Dec-12 |
| 29-67a | PMV            | 15-2-1-29-29-67a | x | 14-Dec-12 |
| 4-58   | Pharmacy       | 1-3-1-4-04-58    | x | 10-Dec-12 |
| 13-58  | Pharmacy       | 1-3-1-13-13-58   | x | 14-Dec-12 |
| 60-58  | PMV            | 1-3-1-60-60-58   | x | 13-Dec-12 |
| 12-57  | Pharmacy       | 4-1-2-12-12-57   | x | 14-Dec-12 |
| 23-57  | Pharmacy       | 4-1-2-23-23-57   | x | 10-Dec-12 |
| 38-58  | PMV            | 4-1-2-38-38-58   | x | 14-Dec-12 |
| 11-58  | Pharmacy       | 6-2-1-11-11-58   | x | 18-Dec-12 |

|        |          |                  |   |           |
|--------|----------|------------------|---|-----------|
| 15-58  | PMV      | 6-2-1-15-15-58   | x | 17-Dec-12 |
| 28-58  | PMV      | 6-2-1-28-28-58   | x | 14-Dec-12 |
| 9-58   | Pharmacy | 6-2-3-9-09-58    | x | 11-Dec-12 |
| 25-58  | PMV      | 6-2-3-25-25-58   | x | 08-Dec-12 |
| 37-58  | PMV      | 6-2-3-37-37-58   | x | 12-Dec-12 |
| 16-58  | PMV      | 8-2-4-16-16-58   | x | 13-Dec-12 |
| 23-58  | PMV      | 8-2-4-23-23-58   | x | 13-Dec-12 |
| 33-58  | PMV      | 8-2-4-33-33-58   | x | 13-Dec-12 |
| 1-58   | Pharmacy | 9-2-2-1-01-58    | x | 18-Dec-12 |
| 7-58   | PMV      | 9-2-2-7-07-58    | x | 18-Dec-12 |
| 19-58  | PMV      | 9-3-5-19-19-58   | x | 11-Dec-12 |
| 20-58  | PMV      | 9-3-5-20-20-58   | x | 11-Dec-12 |
| 8-58   | PMV      | 9-3-6-8-08-58    | x | 13-Dec-12 |
| 1-1    | Pharmacy | 10-3-1-1-01-01   | x | 14-Dec-12 |
| 32-58  | PMV      | 13-3-7-32-32-58  | x | 14-Dec-12 |
| 15-58  | PMV      | 14-1-1-15-15-58  | x | 13-Dec-12 |
| 1-57   | Pharmacy | 14-1-3-1-01-57   | x | 11-Dec-12 |
| 5-58   | Pharmacy | 14-1-3-5-05-58   | x | 11-Dec-12 |
| 9-58   | Pharmacy | 14-1-3-9-9-58    | x | 12-Dec-12 |
| 23-53  | PMV      | 14-1-3-23-23-53  | x | 12-Dec-12 |
| 19-58  | PMV      | 15-2-1-19-19-58  | x | 18-Dec-12 |
| 29-58  | Pharmacy | 15-2-1-29-29-58  | x | 14-Dec-12 |
| 10-58  | Pharmacy | 15-2-3-10-10-58  | x | 11-Dec-12 |
| 38-58  | Pharmacy | 15-2-3-38-38-58  | x | 13-Dec-12 |
| 28-58  | Pharmacy | 16-1-1-28-28-58  | x | 14-Dec-12 |
| 7-57   | Pharmacy | 16-1-3-7-07-57   | x | 11-Dec-12 |
| 11-57  | Pharmacy | 16-1-3-11-11-57  | x | 10-Dec-12 |
| 14-58  | Pharmacy | 16-1-3-4-014-058 | x | 12-Dec-12 |
| 31-58  | Pharmacy | 16-1-3-31-31-58  | x | 18-Dec-12 |
| 38-58  | Pharmacy | 16-1-3-38-38-58  | x | 14-Dec-12 |
| 4-67   | PMV      | 1-3-1-4-04-67    | x | 10-Dec-12 |
| 8-67L  | Pharmacy | 5-1-2-8-8-67L    | x | 11-Dec-12 |
| 11-67D | Pharmacy | 6-2-1-11-11-67D  | x | 18-Dec-12 |
| 14-67D | Pharmacy | 6-2-3-14-14-67D  | x | 10-Dec-12 |
| 38-67  | PMV      | 16-1-3-38-38-67  | x | 14-Dec-12 |
| 9-67B  | PMV      | 6-2-3-9-09-67B   | x | 11-Dec-12 |
| 34-67A | PMV      | 4-2-3-34-34-67A  | x | 06-Feb-13 |
| 10-46  | Pharmacy | 3-1-3-10-10-46   | x | 06-Feb-13 |
| 21-46  | Pharmacy | 3-1-3-21-21-46   | x | 07-Feb-13 |
| 43-11  | PMV      | 4-1-2-43-43-11   | x | 15-Dec-12 |
| 1-46   | Pharmacy | 4-2-3-1-1-46     | x | 05-Feb-13 |
| 4-46   | PMV      | 11-3-7-4-4-46    | x | 06-Feb-13 |
| 29-46  | PMV      | 11-3-7-29-29-46  | x | 06-Feb-13 |
| 2-46   | Pharmacy | 12-2-1-2-2-46    | x | 06-Feb-13 |
| 27-46  | Pharmacy | 12-2-1-27-27-46  | x | 06-Feb-13 |
| 28-44  | PMV      | 12-2-1-28-28-44  | x | 05-Feb-13 |
| 22-46  | PMV      | 14-2-5-22-22-46  | x | 07-Feb-13 |
| 53-46  | PMV      | 14-3-1-53-53-46  | x | 07-Feb-13 |
| 17-46  | PMV      | 15-2-4-17-17-46  | x | 07-Feb-13 |
| 23-67  | PMV      | 15-2-4-23-23-67  | x | 07-Feb-13 |

|        |          |                 |   |           |
|--------|----------|-----------------|---|-----------|
| 72-46  | PMV      | 16-3-1-72-72-46 | x | 09-Feb-13 |
| 83-46  | Pharmacy | 16-3-1-83-83-46 | x | 05-Feb-13 |
| 34-44  | Pharmacy | 3-1-3-34-34-44  | x | 05-Feb-13 |
| 9-44   | Pharmacy | 11-3-7-9-9-44   | x | 05-Feb-13 |
| 33-46  | PMV      | 11-3-7-33-33-46 | x | 06-Feb-13 |
| 17-67  | PMV      | 15-2-4-17-17-67 | x | 07-Feb-13 |
| 30-52  | Pharmacy | 3-1-3-30-30-52  | x | 09-Feb-13 |
| 27-44  | PMV      | 4-2-3-27-27-44  | x | 08-Feb-13 |
| 5-45   | PMV      | 9-1-1-5-5-45    | x | 07-Feb-13 |
| 20-45  | PMV      | 11-3-5-20-20-45 | x | 06-Feb-13 |
| 33-45  | PMV      | 11-3-7-33-33-45 | x | 06-Feb-13 |
| 6-45   | PMV      | 12-2-6-6-6-45   | x | 06-Feb-13 |
| 17-45  | PMV      | 15-2-4-17-17-45 | x | 07-Feb-13 |
| 42-45  | PMV      | 15-2-4-42-42-45 | x | 05-Feb-13 |
| 5-45   | PMV      | 16-3-2-5-5-45   | x | 08-Feb-13 |
| 51-45  | PMV      | 17-1-2-51-51-45 | x | 05-Feb-13 |
| 27-44  | PMV      | 3-1-3-27-27-44  | x | 08-Feb-13 |
| 20-44  | PMV      | 4-2-3-20-20-44  | x | 06-Feb-13 |
| 26-44  | PMV      | 4-2-3-26-26-44  | x | 06-Feb-13 |
| 37-45  | PMV      | 4-2-3-37-37-45  | x | 06-Feb-13 |
| 1-45   | Pharmacy | 11-3-7-1-1-45   | x | 05-Feb-13 |
| 28-44  | PMV      | 11-3-7-28-28-44 | x | 05-Feb-13 |
| 31-45  | PMV      | 11-3-7-31-31-45 | x | 07-Feb-13 |
| 28-45  | PMV      | 12-2-1-28-28-45 | x | 05-Feb-13 |
| 22-45  | PMV      | 14-2-5-22-22-45 | x | 07-Feb-13 |
| 14-46  | Pharmacy | 14-3-1-14-14-46 | x | 05-Jan-13 |
| 11-44  | Pharmacy | 15-2-4-11-11-44 | x | 05-Feb-13 |
| 14-44  | PMV      | 15-2-4-14-14-44 | x | 06-Feb-13 |
| 17-44  | PMV      | 15-2-4-17-17-44 | x | 07-Feb-13 |
| 34-44  | PMV      | 15-2-4-34-34-44 | x | 08-Feb-13 |
| 36-44  | PMV      | 15-2-4-36-36-44 | x | 06-Feb-13 |
| 39-44  | PMV      | 15-2-4-39-39-44 | x | 05-Feb-13 |
| 42-44  | PMV      | 15-2-4-42-42-44 | x | 05-Feb-13 |
| 69-44  | PMV      | 16-3-1-69-69-44 | x | 09-Feb-13 |
| 72-44  | PMV      | 16-3-1-72-72-44 | x | 09-Feb-13 |
| 5-44   | PMV      | 16-3-2-5-5-44   | x | 08-Feb-13 |
| 2-67   | PMV      | 17-1-3-2-2-67   | x | 06-Feb-13 |
| 10-3   | Pharmacy | 3-1-3-10-10-3   | x | 06-Feb-13 |
| 32-3   | Pharmacy | 3-1-3-32-32-3   | x | 08-Feb-13 |
| 10-3   | Pharmacy | 4-2-1-10-10-3   | x | 07-Feb-13 |
| 6-3    | PMV      | 9-1-1-6-6-3     | x | 07-Feb-13 |
| 29-3   | Pharmacy | 9-1-2-29-29-3   | x | 05-Feb-13 |
| 5-3    | Pharmacy | 12-2-6-5-5-3    | x | 09-Feb-13 |
| 2-3    | Pharmacy | 14-2-5-2-2-3    | x | 06-Feb-13 |
| 8-3    | Pharmacy | 15-2-4-8-8-3    | x | 06-Feb-13 |
| 74-67  | PMV      | 16-3-1-74-74-67 | x | 09-Feb-13 |
| 36-3   | PMV      | 17-1-2-36-36-3  | x | 08-Feb-13 |
| 34-05B | Pharmacy | 3-1-3-34-34-05B | x | 05-Feb-13 |
| 18-5   | Pharmacy | 9-1-2-18-18-5   | x | 05-Feb-13 |
| 11-5   | Pharmacy | 15-2-4-11-11-5  | x | 05-Feb-13 |

|        |          |                  |   |           |
|--------|----------|------------------|---|-----------|
| 19-5   | Pharmacy | 17-1-2-19-19-5   | x | 08-Jan-13 |
| 1-11   | Pharmacy | 11-3-7-1-1-11    | x | 05-Feb-13 |
| 2-11   | Pharmacy | 14-2-5-2-2-11    | x | 06-Feb-13 |
| 21-11  | Pharmacy | 3-1-3-21-21-11   | x | 07-Feb-13 |
| 6-11   | PMV      | 9-1-1-6-6-11     | x | 07-Feb-13 |
| 10-11  | Pharmacy | 12-2-1-10-10-11  | x | 04-Feb-13 |
| 59-11  | Pharmacy | 17-1-2-59-59-11  | x | 07-Feb-13 |
| 10-67A | PMV      | 16-3-1-10-10-67A | x | 06-Feb-13 |
| 28-18  | PMV      | 4-2-3-28-28-18   | x | 06-Feb-13 |
| 38-18  | Pharmacy | 4-2-3-38-38-18   | x | 05-Feb-13 |
| 9-25   | Pharmacy | 3-1-3-9-9-25     | x | 09-Feb-13 |
| 10-25  | Pharmacy | 3-1-3-10-10-25   | x | 06-Feb-13 |
| 11-25  | Pharmacy | 3-1-3-11-11-25   | x | 07-Feb-13 |
| 21-25  | Pharmacy | 3-1-3-21-21-25   | x | 07-Feb-13 |
| 33-25  | Pharmacy | 3-1-3-33-33-25   | x | 07-Feb-13 |
| 34-25  | Pharmacy | 3-1-3-34-34-25   | x | 05-Feb-13 |
| 3-25   | Pharmacy | 3-2-3-3-3-25     | x | 08-Feb-13 |
| 10-25  | Pharmacy | 4-2-1-10-10-25   | x | 07-Feb-13 |
| 8-25   | Pharmacy | 4-2-3-8-8-25     | x | 05-Feb-13 |
| 16-25  | Pharmacy | 4-2-3-16-16-25   | x | 06-Feb-13 |
| 20-25  | PMV      | 4-2-3-20-20-25   | x | 06-Feb-13 |
| 31-25  | PMV      | 4-2-3-31-31-25   | x | 05-Feb-13 |
| 38-25  | Pharmacy | 4-2-3-38-38-25   | x | 05-Feb-13 |
| 16-25  | Pharmacy | 9-1-1-16-16-25   | x | 06-Feb-13 |
| 28-25  | PMV      | 11-3-7-28-28-25  | x | 05-Feb-13 |
| 1-28B  | Pharmacy | 12-2-1-1-1-28B   | x | 05-Feb-13 |
| 10-25  | Pharmacy | 12-2-1-10-10-25  | x | 05-Feb-13 |
| 14-25  | PMV      | 12-2-1-14-14-25  | x | 06-Feb-13 |
| 1-25   | Pharmacy | 12-2-6-1-1-25    | x | 08-Feb-13 |
| 5-25   | Pharmacy | 12-2-6-5-5-25    | x | 09-Feb-13 |
| 8-25   | Pharmacy | 14-3-1-8-8-25    | x | 05-Jan-13 |
| 31-25  | PMV      | 14-3-1-31-31-25  | x | 07-Feb-13 |
| 62-25  | Pharmacy | 14-3-1-62-62-25  | x | 08-Feb-13 |
| 1-25   | Pharmacy | 14-3-2-1-1-25    | x | 06-Jan-13 |
| 8-25   | Pharmacy | 15-2-4-8-8-25    | x | 06-Feb-13 |
| 14-25  | PMV      | 15-2-4-14-14-25  | x | 06-Feb-13 |
| 25-25  | PMV      | 15-2-4-25-25-25  | x | 07-Feb-13 |
| 74-25  | PMV      | 16-3-1-74-74-25  | x | 09-Feb-13 |
| 76-25  | PMV      | 16-3-1-76-76-25  | x | 09-Feb-13 |
| 36-25  | PMV      | 17-1-2-36-36-25  | x | 08-Feb-13 |
| 57-25  | PMV      | 17-1-2-57-57-25  | x | 06-Feb-13 |
| 2-25   | PMV      | 17-1-3-2-2-25    | x | 06-Feb-13 |
| 3-25   | Pharmacy | 17-1-3-3-3-25    | x | 06-Feb-13 |
| 14-26  | Pharmacy | 3-1-3-14-14-26   | x | 05-Feb-13 |
| 20-26  | Pharmacy | 9-1-2-20-20-26   | x | 05-Jan-13 |
| 4-26   | PMV      | 11-3-7-4-4-26    | x | 06-Feb-13 |
| 72-27  | PMV      | 16-3-1-72-72-27  | x | 09-Feb-13 |
| 5-26   | PMV      | 16-3-3-5-5-26    | x | 09-Feb-13 |
| 7-26   | Pharmacy | 3-1-3-7-7-26     | x | 05-Feb-13 |
| 10-26  | Pharmacy | 3-1-3-10-10-26   | x | 06-Feb-13 |

|       |          |                 |   |           |
|-------|----------|-----------------|---|-----------|
| 27-26 | PMV      | 3-1-3-27-27-26  | x | 08-Feb-13 |
| 31-26 | Pharmacy | 3-1-3-31-31-26  | x | 08-Feb-13 |
| 10-0  | Pharmacy | 4-2-1-10-10-0   | x | 07-Feb-13 |
| 1-26  | Pharmacy | 4-2-3-1-1-26    | x | 05-Feb-13 |
| 26-26 | PMV      | 4-2-3-26-26-26  | x | 06-Feb-13 |
| 27-26 | PMV      | 4-2-3-27-27-26  | x | 08-Feb-13 |
| 28-26 | PMV      | 4-2-3-28-28-26  | x | 06-Feb-13 |
| 37-26 | PMV      | 4-2-3-37-37-26  | x | 06-Feb-13 |
| 44-26 | PMV      | 5-1-2-44-44-26  | x | 15-Dec-12 |
| 51-26 | PMV      | 5-1-2-51-51-26  | x | 15-Dec-12 |
| 28-26 | Pharmacy | 9-1-2-28-28-26  | x | 05-Feb-13 |
| 20-26 | PMV      | 11-3-5-20-20-26 | x | 06-Feb-13 |
| 25-26 | PMV      | 11-3-7-25-25-26 | x | 08-Feb-13 |
| 10-26 | Pharmacy | 12-2-1-10-10-26 | x | 04-Feb-13 |
| 6-26  | PMV      | 12-2-6-6-6-26   | x | 06-Feb-13 |
| 2-27  | Pharmacy | 14-2-5-2-2-27   | x | 06-Feb-13 |
| 6-27  | Pharmacy | 14-2-5-6-6-27   | x | 06-Feb-13 |
| 25-27 | Pharmacy | 14-2-5-25-25-27 | x | 06-Feb-13 |
| 10-25 | Pharmacy | 14-3-1-10-10-25 | x | 05-Jan-13 |
| 21-26 | Pharmacy | 14-3-1-21-21-26 | x | 09-Feb-13 |
| 59-27 | Pharmacy | 14-3-1-59-59-27 | x | 08-Feb-13 |
| 34-26 | PMV      | 15-2-4-34-34-26 | x | 08-Feb-13 |
| 5-25  | PMV      | 16-3-2-5-5-25   | x | 08-Feb-13 |
| 33-25 | PMV      | 17-1-2-33-33-25 | x | 05-Feb-13 |
| 60-25 | PMV      | 17-1-2-60-60-25 | x | 06-Feb-13 |
| 10-27 | Pharmacy | 3-1-3-10-10-27  | x | 06-Feb-13 |
| 34-27 | Pharmacy | 3-1-3-34-34-27  | x | 05-Feb-13 |
| 10-27 | Pharmacy | 4-2-1-10-10-27  | x | 07-Feb-13 |
| 27-27 | PMV      | 4-2-3-27-27-27  | x | 08-Feb-13 |
| 28-25 | PMV      | 4-2-3-28-28-25  | x | 06-Feb-13 |
| 42-27 | PMV      | 5-1-2-42-42-27  | x | 15-Dec-12 |
| 7-27  | PMV      | 9-1-1-7-7-27    | x | 06-Feb-13 |
| 20-27 | PMV      | 11-3-5-20-20-27 | x | 06-Feb-13 |
| 9-27  | Pharmacy | 11-3-7-9-9-27   | x | 05-Feb-13 |
| 17-27 | PMV      | 12-2-1-17-17-27 | x | 06-Feb-13 |
| 43-25 | PMV      | 4-1-2-43-43-25  | x | 15-Dec-12 |
| 6-27  | PMV      | 9-1-1-6-6-27    | x | 07-Feb-13 |
| 25-27 | PMV      | 11-3-7-25-25-27 | x | 09-Feb-13 |
| 2-25  | Pharmacy | 12-2-1-2-2-25   | x | 06-Feb-13 |
| 14-27 | Pharmacy | 14-3-1-14-14-27 | x | 05-Jan-13 |
| 5-27  | PMV      | 16-3-2-5-5-27   | x | 08-Feb-13 |
| 10-67 | Pharmacy | 4-2-1-10-10-67  | x | 07-Feb-13 |
| 8-67  | Pharmacy | 4-2-3-8-8-67    | x | 05-Feb-13 |
| 1-67  | Pharmacy | 12-2-1-1-1-67   | x | 05-Feb-13 |
| 10-68 | Pharmacy | 12-2-1-10-10-68 | x | 04-Feb-13 |
| 6-67B | Pharmacy | 14-2-5-6-6-67B  | x | 06-Feb-13 |
| 1-67B | Pharmacy | 14-3-2-1-1-67B  | x | 06-Jan-13 |
| 7-31  | Pharmacy | 15-2-4-7-7-31   | x | 06-Feb-13 |
| 42-31 | PMV      | 5-1-2-42-42-31  | x | 15-Dec-12 |
| 21-31 | Pharmacy | 14-3-1-21-21-31 | x | 09-Feb-13 |

|        |          |                  |   |    |           |
|--------|----------|------------------|---|----|-----------|
| 6-31   | PMV      | 9-1-1-6-6-31     | x |    | 07-Feb-13 |
| 28-31  | PMV      | 11-3-7-28-28-31  | x |    | 05-Feb-13 |
| 2-31   | Pharmacy | 12-2-1-2-2-31    | x |    | 06-Feb-13 |
| 14-57  | Pharmacy | 14-3-1-14-14-57  | x |    | 05-Jan-13 |
| 36-67B | PMV      | 15-2-4-36-36-67B | x |    | 06-Feb-13 |
| 75-52  | PMV      | 16-3-1-75-75-52  | x |    | 06-Feb-13 |
| 19-52  | Pharmacy | 17-1-2-19-19-52  | x |    | 08-Jan-13 |
| 45-67B | PMV      | 4-1-2-45-45-67B  | x | OP | 15-Dec-12 |
| 42-67B | PMV      | 5-1-2-42-42-67B  | x | OP | 15-Dec-12 |
| 6-52   | PMV      | 9-1-1-6-6-52     | x | OP | 07-Feb-13 |
| 14-52  | Pharmacy | 14-3-1-14-14-52  | x | OP | 05-Jan-13 |
| 7-67C  | Pharmacy | 15-2-4-7-7-67C   | x | OP | 06-Feb-13 |
| 36-67A | PMV      | 15-2-4-36-36-67A | x | OP | 06-Feb-13 |
| 5-52C  | PMV      | 16-3-2-5-5-52C   | x | OP | 08-Feb-13 |
| 10-52B | Pharmacy | 3-1-3-10-10-52B  | x | NP | 06-Feb-13 |
| 30-52  | Pharmacy | 3-1-3-30-30-52   | x | NP | 09-Feb-13 |
| 27-52A | PMV      | 4-2-3-27-27-52A  | x | NP | 08-Feb-13 |
| 28-52  | PMV      | 4-2-3-28-28-52   | x | NP | 06-Feb-13 |
| 34-46  | PMV      | 4-2-3-34-34-46   | x | NP | 06-Feb-13 |
| 44-67  | PMV      | 5-1-2-44-44-67   | x | NP | 15-Dec-12 |
| 7-52   | PMV      | 9-1-1-7-7-52     | x | NP | 06-Feb-13 |
| 29-52  | Pharmacy | 9-1-2-29-29-52   | x | NP | 05-Feb-13 |
| 4-52   | PMV      | 11-3-7-4-4-52    | x | NP | 06-Feb-13 |
| 27-52  | Pharmacy | 12-2-1-27-27-52  | x | NP | 06-Feb-13 |
| 5-52A  | PMV      | 16-3-2-5-5-52A   | x | NP | 08-Feb-13 |
| 83-52  | Pharmacy | 16-3-1-83-83-52  | x |    | 05-Feb-13 |
| 7-52   | Pharmacy | 3-1-3-7-7-52     | x | OP | 05-Feb-13 |
| 21-52  | Pharmacy | 3-1-3-21-21-52   | x | OP | 07-Feb-13 |
| 34-52  | Pharmacy | 3-1-3-34-34-52   | x | OP | 05-Feb-13 |
| 13-52  | Pharmacy | 4-1-2-13-13-52   | x | OP | 15-Dec-12 |
| 26-52  | PMV      | 4-2-3-26-26-52   | x | OP | 06-Feb-13 |
| 34-52  | PMV      | 4-2-3-34-34-52   | x | OP | 06-Feb-13 |
| 16-52  | Pharmacy | 9-1-1-16-16-52   | x | OP | 06-Feb-13 |
| 11-52  | PMV      | 9-1-1-11-11-52   | x | OP | 06-Feb-13 |
| 29-52  | PMV      | 11-3-7-29-29-52  | x | OP | 06-Feb-13 |
| 9-52   | Pharmacy | 11-3-7-9-9-52    | x | OP | 05-Feb-13 |
| 12-52  | PMV      | 11-3-7-12-12-52  | x | OP | 06-Feb-13 |
| 10-52  | Pharmacy | 14-3-1-10-10-52  | x | OP | 05-Jan-13 |
| 21-52  | Pharmacy | 14-3-1-21-21-52  | x | OP | 09-Feb-13 |
| 27-52  | PMV      | 15-2-4-27-27-52  | x | OP | 07-Feb-13 |
| 44-52  | PMV      | 15-2-4-44-44-52  | x | OP | 05-Feb-13 |
| 69-52  | PMV      | 16-3-1-69-69-52  | x | OP | 09-Feb-13 |
| 5-52B  | PMV      | 16-3-2-5-5-52B   | x | OP | 08-Feb-13 |
| 15-52  | Pharmacy | 17-1-2-15-15-52  | x | OP | 07-Feb-13 |
| 10-52A | Pharmacy | 3-1-3-10-10-52A  | x | NP | 06-Feb-13 |
| 14-52  | Pharmacy | 3-1-3-14-14-52   | x | NP | 05-Feb-13 |
| 27-52  | PMV      | 3-1-3-27-27-52   | x | NP | 08-Feb-13 |
| 39-59  | PMV      | 4-1-2-39-39-59   | x | NP | 15-Dec-12 |
| 45-52  | PMV      | 4-1-2-45-45-52   | x | NP | 15-Dec-12 |
| 10-52  | Pharmacy | 4-2-1-10-10-52   | x | NP | 07-Feb-13 |

|        |          |                  |   |    |           |
|--------|----------|------------------|---|----|-----------|
| 1-52   | Pharmacy | 4-2-3-1-1-52     | x | NP | 05-Feb-13 |
| 24-52  | PMV      | 4-2-3-24-24-52   | x | NP | 06-Feb-13 |
| 27-52B | PMV      | 4-2-3-27-27-52B  | x | NP | 08-Feb-13 |
| 28-52  | PMV      | 4-2-3-28-28-52   | x | NP | 06-Feb-13 |
| 31-52  | PMV      | 4-2-3-31-31-52   | x | NP | 05-Feb-13 |
| 10-52  | PMV      | 9-1-1-10-10-52   | x | NP | 06-Feb-13 |
| 19-52  | Pharmacy | 9-1-2-19-19-52   | x | NP | 05-Feb-13 |
| 25-52  | Pharmacy | 9-1-2-25-25-52   | x | NP | 06-Feb-13 |
| 28-52  | Pharmacy | 9-1-2-28-28-52   | x | NP | 05-Feb-13 |
| 1-44   | Pharmacy | 11-3-6-1-1-44    | x | NP | 07-Feb-13 |
| 4-67   | PMV      | 11-3-7-4-4-67    | x | NP | 06-Feb-13 |
| 28-52  | PMV      | 11-3-7-28-28-52  | x | NP | 05-Feb-13 |
| 31-51  | PMV      | 11-3-7-31-31-51  | x | NP | 07-Feb-13 |
| 10-52  | Pharmacy | 12-2-1-10-10-52  | x | NP | 05-Feb-13 |
| 6-52   | PMV      | 12-2-6-6-6-52    | x | NP | 06-Feb-13 |
| 2-52   | Pharmacy | 14-2-5-2-2-52    | x | NP | 06-Feb-13 |
| 25-52  | Pharmacy | 14-2-5-25-25-52  | x | NP | 06-Feb-13 |
| 22-52  | PMV      | 15-2-4-22-22-52  | x | NP | 08-Feb-13 |
| 34-52  | PMV      | 15-2-4-34-34-52  | x | NP | 08-Feb-13 |
| 74-52  | PMV      | 16-3-1-74-74-52  | x | NP | 09-Feb-13 |
| 5-52   | PMV      | 16-3-3-5-5-52    | x | NP | 08-Feb-13 |
| 18-52  | Pharmacy | 17-1-2-18-18-52  | x | NP | 05-Feb-13 |
| 39-52  | PMV      | 17-1-2-39-39-52  | x | NP | 05-Feb-13 |
| 57-52  | PMV      | 17-1-2-57-57-52  | x | NP | 06-Feb-13 |
| 2-67A  | Pharmacy | 14-2-5-2-2-67A   | x |    | 06-Feb-13 |
| 33-67B | PMV      | 17-1-2-33-33-67B | x |    | 05-Feb-13 |
| 33-56  | Pharmacy | 3-1-3-33-33-56   | x |    | 07-Feb-13 |
| 11-59  | Pharmacy | 3-1-3-11-11-59   | x |    | 07-Feb-13 |
| 43-59  | PMV      | 4-1-2-43-43-59   | x |    | 15-Dec-12 |
| 16-59  | Pharmacy | 9-1-1-16-16-59   | x |    | 06-Feb-13 |
| 18-59  | Pharmacy | 9-1-2-18-18-59   | x |    | 05-Feb-13 |
| 20-59  | Pharmacy | 9-1-2-20-20-59   | x |    | 05-Feb-13 |
| 4-59   | Pharmacy | 15-2-4-4-4-59    | x |    | 07-Feb-13 |
| 6-67C  | Pharmacy | 14-2-5-6-6-67C   | x |    | 06-Feb-13 |
| 33-67  | Pharmacy | 3-1-3-33-33-67   | x |    | 07-Feb-13 |
| 2-5    | Pharmacy | 14-2-5-2-2-5     | x |    | 06-Feb-13 |
| 4-67F  | Pharmacy | 15-2-4-4-4-67F   | x |    | 07-Feb-13 |
| 10-10  | Pharmacy | 3-1-3-10-10-10   | x |    | 06-Feb-13 |
| 31-10  | Pharmacy | 3-1-3-31-31-10   | x |    | 08-Feb-13 |
| 32-10  | Pharmacy | 3-1-3-32-32-10   | x |    | 08-Feb-13 |
| 33-10  | Pharmacy | 3-1-3-33-33-10   | x |    | 07-Feb-13 |
| 3-10   | Pharmacy | 3-2-3-3-03-10    | x |    | 08-Feb-13 |
| 12-10  | Pharmacy | 3-2-5-12-12-10   | x |    | 11-Feb-13 |
| 9-10   | Pharmacy | 11-3-7-9-9-10    | x |    | 05-Feb-13 |
| 28-10  | PMV      | 11-3-7-28-28-10  | x |    | 05-Feb-13 |
| 14-10  | PMV      | 12-2-1-14-14-10  | x |    | 06-Feb-13 |
| 42-10  | Pharmacy | 14-3-1-42-42-10  | x |    | 06-Feb-13 |
| 7-10   | Pharmacy | 15-2-4-7-7-10    | x |    | 06-Feb-13 |
| 77-10  | PMV      | 16-3-1-77-77-10  | x |    | 06-Feb-13 |
| 83-10  | Pharmacy | 16-3-1-83-83-10  | x |    | 05-Feb-13 |



|        |          |                  |   |           |
|--------|----------|------------------|---|-----------|
| 36-10  | PMV      | 17-1-2-36-36-10  | x | 08-Feb-13 |
| 59-10  | Pharmacy | 17-1-2-59-59-10  | x | 07-Feb-13 |
| 2-10   | PMV      | 17-1-3-2-2-10    | x | 06-Feb-13 |
| 57-67a | PMV      | 17-1-2-57-57-67a | x | 06-Feb-13 |
| 4-67H  | Pharmacy | 15-2-4-4-4-67H   | x | 07-Feb-13 |
| 3-47   | Pharmacy | 3-2-3-3-3-47     | x | 08-Feb-13 |
| 42-47  | Pharmacy | 14-3-1-42-42-47  | x | 06-Feb-13 |
| 18-67A | Pharmacy | 9-1-2-18-18-67A  | x | 05-Feb-13 |
| 18-60  | Pharmacy | 9-1-2-18-18-60   | x | 05-Feb-13 |
| 20-61  | Pharmacy | 9-1-2-20-20-61   | x | 05-Jan-13 |
| 14-2   | Pharmacy | 3-1-3-14-14-2    | x | 05-Feb-13 |
| 31-2   | Pharmacy | 3-1-3-31-31-2    | x | 08-Feb-13 |
| 33-2   | Pharmacy | 3-1-3-33-33-2    | x | 07-Feb-13 |
| 3-67B  | Pharmacy | 3-2-3-3-3-67B    | x | 08-Feb-13 |
| 12-2   | Pharmacy | 3-2-5-12-12-2    | x | 11-Feb-13 |
| 10-62  | Pharmacy | 4-2-1-10-10-62   | x | 07-Feb-13 |
| 37-2   | PMV      | 4-2-3-37-37-2    | x | 06-Feb-13 |
| 19-2   | Pharmacy | 9-1-2-19-19-2    | x | 05-Feb-13 |
| 28-2   | PMV      | 11-3-7-28-28-2   | x | 05-Feb-13 |
| 10-2   | Pharmacy | 12-2-1-10-10-2   | x | 05-Feb-13 |
| 14-2   | PMV      | 12-2-1-14-14-2   | x | 06-Feb-13 |
| 8-2    | Pharmacy | 14-3-1-8-8-2     | x | 05-Jan-13 |
| 62-2   | Pharmacy | 14-3-1-62-62-2   | x | 08-Feb-13 |
| 25-2   | PMV      | 15-2-4-25-25-2   | x | 07-Feb-13 |
| 34-2   | PMV      | 15-2-4-34-34-2   | x | 08-Feb-13 |
| 36-2   | PMV      | 15-2-4-36-36-2   | x | 06-Feb-13 |
| 76-2   | PMV      | 16-3-1-76-76-2   | x | 09-Feb-13 |
| 83-2   | Pharmacy | 16-3-1-83-83-2   | x | 05-Feb-13 |
| 2-2    | PMV      | 17-1-3-2-2-2     | x | 06-Feb-13 |
| 30-5   | Pharmacy | 3-1-3-30-30-5    | x | 09-Feb-13 |
| 34-5A  | Pharmacy | 3-1-3-34-34-5A   | x | 05-Feb-13 |
| 12-5   | Pharmacy | 3-2-5-12-12-5    | x | 11-Feb-13 |
| 43-5   | PMV      | 4-1-2-43-43-5    | x | 15-Dec-12 |
| 16-5   | Pharmacy | 9-1-1-16-16-5    | x | 06-Feb-13 |
| 28-5   | Pharmacy | 9-1-2-28-28-5    | x | 05-Feb-13 |
| 31-5   | PMV      | 14-3-1-31-31-5   | x | 07-Feb-13 |
| 37-5   | Pharmacy | 14-3-1-37-37-5   | x | 09-Feb-13 |
| 11-6   | Pharmacy | 3-1-3-11-11-6    | x | 07-Feb-13 |
| 21-6   | Pharmacy | 3-1-3-21-21-6    | x | 07-Feb-13 |
| 32-6   | Pharmacy | 3-1-3-32-32-6    | x | 08-Feb-13 |
| 62-6   | Pharmacy | 14-3-1-62-62-6   | x | 08-Feb-13 |
| 1-6    | Pharmacy | 14-3-2-1-1-6     | x | 06-Jan-13 |
| 2-6    | PMV      | 17-1-3-2-2-6     | x | 06-Feb-13 |
| 3-67A  | Pharmacy | 3-2-3-3-3-67A    | x | 08-Feb-13 |
| 6-67   | Pharmacy | 3-2-3-6-6-67     | x | 11-Feb-13 |
| 38-67A | Pharmacy | 4-2-3-38-38-67A  | x | 05-Feb-13 |
| 4-67K  | Pharmacy | 15-2-4-4-4-67K   | x | 07-Feb-13 |
| 13-67  | PMV      | 4-1-2-13-13-67   | x | 15-Dec-12 |
| 11-67A | PMV      | 16-3-5-11-11-67A | x | 05-Feb-13 |
| 7-19   | PMV      | 9-1-1-7-7-19     | x | 06-Feb-13 |

|        |          |                  |   |           |
|--------|----------|------------------|---|-----------|
| 18-19  | Pharmacy | 9-1-2-18-18-19   | x | 05-Feb-13 |
| 36-57  | PMV      | 17-1-2-36-36-57  | x | 08-Feb-13 |
| 42-67A | Pharmacy | 14-3-1-42-42-67A | x | 06-Feb-13 |
| 77-67  | PMV      | 16-3-1-77-77-67  | x | 06-Feb-13 |
| 57-67b | PMV      | 17-1-2-57-57-67b | x | 06-Feb-13 |
| 28-67A | PMV      | 4-2-3-28-28-67A  | x | 06-Feb-13 |
| 9-67   | Pharmacy | 11-3-7-9-9-67    | x | 05-Feb-13 |
| 27-67A | Pharmacy | 12-2-1-27-27-67A | x | 06-Feb-13 |
| 2-67   | Pharmacy | 14-2-5-2-2-67    | x | 06-Feb-13 |
| 4-67L  | Pharmacy | 15-2-4-4-4-67L   | x | 07-Feb-13 |
| 11-67A | Pharmacy | 15-2-4-11-11-67A | x | 05-Feb-13 |
| 42-67  | PMV      | 15-2-4-42-42-67  | x | 05-Feb-13 |
| 11-29  | Pharmacy | 3-1-3-11-11-29   | x | 07-Feb-13 |
| 12-29  | Pharmacy | 3-2-5-12-12-29   | x | 11-Feb-13 |
| 16-29  | Pharmacy | 4-2-3-16-16-29   | x | 06-Feb-13 |
| 21-29  | PMV      | 4-2-3-21-21-29   | x | 05-Feb-13 |
| 31-29  | PMV      | 4-2-3-31-31-29   | x | 05-Feb-13 |
| 7-29   | PMV      | 9-1-1-7-7-29     | x | 06-Feb-13 |
| 28-29  | PMV      | 11-3-7-28-28-29  | x | 05-Feb-13 |
| 1-32   | Pharmacy | 11-3-6-1-1-32    | x | 07-Feb-13 |
| 28-32  | PMV      | 11-3-7-28-28-32  | x | 05-Feb-13 |
| 5-67A  | Pharmacy | 12-2-6-5-5-67A   | x | 09-Feb-13 |
| 19-67  | Pharmacy | 17-1-2-19-19-67  | x | 08-Jan-13 |
| 31-40  | Pharmacy | 3-1-3-31-31-40   | x | 08-Feb-13 |
| 38-40  | Pharmacy | 4-2-3-38-38-40   | x | 05-Feb-13 |
| 16-40  | Pharmacy | 9-1-1-16-16-40   | x | 06-Feb-13 |
| 28-40  | PMV      | 11-3-7-28-28-40  | x | 05-Feb-13 |
| 27-40  | Pharmacy | 12-2-1-27-27-40  | x | 06-Feb-13 |
| 12-67C | Pharmacy | 3-2-5-12-12-67C  | x | 11-Feb-13 |
| 1-67   | Pharmacy | 4-2-3-1-1-67     | x | 05-Feb-13 |
| 20-67A | PMV      | 4-2-3-20-20-67A  | x | 06-Feb-13 |
| 21-67B | PMV      | 4-2-3-21-21-67B  | x | 05-Feb-13 |
| 25-67B | Pharmacy | 9-1-2-25-25-67B  | x | 06-Feb-13 |
| 28-67B | PMV      | 12-2-1-28-28-67B | x | 05-Feb-13 |
| 1-67A  | Pharmacy | 14-3-2-1-1-67A   | x | 06-Jan-13 |
| 4-67D  | Pharmacy | 15-2-4-4-4-67D   | x | 07-Feb-13 |
| 7-67B  | Pharmacy | 15-2-4-7-7-67B   | x | 06-Feb-13 |
| 25-67A | PMV      | 15-2-4-25-25-67A | x | 07-Feb-13 |
| 42-67  | PMV      | 15-2-4-42-42-67  | x | 05-Feb-13 |
| 11-67B | Pharmacy | 15-2-4-11-11-67B | x | 05-Feb-13 |
| 6-67A  | PMV      | 9-1-1-6-6-67A    | x | 07-Feb-13 |
| 4-67B  | Pharmacy | 15-2-4-4-4-67B   | x | 07-Feb-13 |
| 21-67A | PMV      | 4-2-3-21-21-67A  | x | 05-Feb-13 |
| 28-67  | PMV      | 4-2-3-28-28-67   | x | 06-Feb-13 |
| 34-67  | PMV      | 4-2-3-34-34-67   | x | 06-Feb-13 |
| 37-67  | PMV      | 4-2-3-37-37-67   | x | 06-Feb-13 |
| 28-67A | PMV      | 12-2-1-28-28-67A | x | 05-Feb-13 |
| 5-67C  | Pharmacy | 12-2-6-5-5-67C   | x | 09-Feb-13 |
| 7-67A  | Pharmacy | 15-2-4-7-7-67A   | x | 06-Feb-13 |
| 11-67C | Pharmacy | 15-2-4-11-11-67C | x | 05-Feb-13 |

|        |          |                 |   |           |
|--------|----------|-----------------|---|-----------|
| 5-67   | PMV      | 16-3-2-5-5-67   | x | 08-Feb-13 |
| 7-51   | Pharmacy | 3-1-3-7-7-51    | x | 05-Feb-13 |
| 9-48   | Pharmacy | 3-1-3-9-9-48    | x | 09-Feb-13 |
| 11-48B | Pharmacy | 3-1-3-11-11-48B | x | 07-Feb-13 |
| 12-48  | Pharmacy | 3-2-5-12-12-48  | x | 11-Feb-13 |
| 30-48  | PMV      | 4-2-3-30-30-48  | x | 05-Feb-13 |
| 37-48  | PMV      | 4-2-3-37-37-48  | x | 06-Feb-13 |
| 44-48  | PMV      | 5-1-2-44-44-48  | x | 15-Dec-12 |
| 29-48  | Pharmacy | 9-1-2-29-29-48  | x | 05-Feb-13 |
| 28-48  | PMV      | 11-3-7-28-28-48 | x | 05-Feb-13 |
| 27-48  | Pharmacy | 12-2-1-27-27-48 | x | 06-Feb-13 |
| 5-48   | Pharmacy | 12-2-6-5-5-48   | x | 09-Feb-13 |
| 1-48   | Pharmacy | 14-3-2-1-1-48   | x | 06-Jan-13 |
| 5-48   | PMV      | 16-3-2-5-5-48   | x | 08-Feb-13 |
| 36-48  | PMV      | 17-1-2-36-36-48 | x | 08-Feb-13 |
| 59-48  | Pharmacy | 17-1-2-59-59-48 | x | 07-Feb-13 |
| 7-51   | Pharmacy | 3-1-3-7-7-51    | x | 05-Feb-13 |
| 10-51  | Pharmacy | 3-1-3-10-10-51  | x | 06-Feb-13 |
| 14-51  | Pharmacy | 3-1-3-14-14-51  | x | 05-Feb-13 |
| 27-51  | PMV      | 3-1-3-27-27-51  | x | 08-Feb-13 |
| 30-51  | Pharmacy | 3-1-3-30-30-51  | x | 09-Feb-13 |
| 31-51  | Pharmacy | 3-1-3-31-31-51  | x | 08-Feb-13 |
| 32-51  | Pharmacy | 3-1-3-32-32-51  | x | 08-Feb-13 |
| 33-51  | Pharmacy | 3-1-3-33-33-51  | x | 07-Feb-13 |
| 34-51  | Pharmacy | 3-1-3-34-34-51  | x | 05-Feb-13 |
| 3-57   | Pharmacy | 3-2-3-3-3-57    | x | 08-Feb-13 |
| 6-51   | Pharmacy | 3-2-3-6-6-51    | x | 11-Feb-13 |
| 12-51  | Pharmacy | 3-2-5-12-12-51  | x | 11-Feb-13 |
| 13-51  | Pharmacy | 4-1-2-13-13-51  | x | 15-Dec-12 |
| 39-51  | PMV      | 4-1-2-39-39-51  | x | 15-Dec-12 |
| 10-51  | Pharmacy | 4-2-1-10-10-51  | x | 07-Feb-13 |
| 8-51   | Pharmacy | 4-2-3-8-8-51    | x | 05-Feb-13 |
| 16-51  | Pharmacy | 4-2-3-16-16-51  | x | 06-Feb-13 |
| 24-51  | PMV      | 4-2-3-24-24-51  | x | 06-Feb-13 |
| 30-51  | PMV      | 4-2-3-30-30-51  | x | 05-Feb-13 |
| 31-51  | PMV      | 4-2-3-31-31-51  | x | 05-Feb-13 |
| 37-51  | PMV      | 4-2-3-37-37-51  | x | 06-Feb-13 |
| 38-51  | Pharmacy | 4-2-3-38-38-51  | x | 05-Feb-13 |
| 42-51  | PMV      | 5-1-2-42-42-51  | x | 15-Dec-12 |
| 10-51  | PMV      | 9-1-1-10-10-51  | x | 06-Feb-13 |
| 16-51  | Pharmacy | 9-1-1-16-16-51  | x | 06-Feb-13 |
| 19-51  | Pharmacy | 9-1-2-19-19-51  | x | 05-Feb-13 |
| 20-51  | Pharmacy | 9-1-2-20-20-51  | x | 05-Feb-13 |
| 25-51  | Pharmacy | 9-1-2-25-25-51  | x | 06-Feb-13 |
| 28-51  | Pharmacy | 9-1-2-28-28-51  | x | 05-Feb-13 |
| 29-51  | Pharmacy | 9-1-2-29-29-51  | x | 05-Feb-13 |
| 20-51  | PMV      | 11-3-5-20-20-51 | x | 06-Feb-13 |
| 1-51   | Pharmacy | 11-3-6-1-1-51   | x | 07-Feb-13 |
| 4-51   | PMV      | 11-3-7-4-4-51   | x | 06-Feb-13 |
| 28-52  | PMV      | 11-3-7-28-28-52 | x | 05-Feb-13 |

|        |          |                  |   |           |
|--------|----------|------------------|---|-----------|
| 33-51  | PMV      | 11-3-7-33-33-51  | x | 06-Feb-13 |
| 2-51   | Pharmacy | 12-2-1-2-2-51    | x | 06-Feb-13 |
| 10-51  | Pharmacy | 12-2-1-10-10-51  | x | 04-Feb-13 |
| 14-51  | PMV      | 12-2-1-14-14-51  | x | 06-Feb-13 |
| 15-51  | PMV      | 12-2-1-15-15-51  | x | 06-Feb-13 |
| 5-51   | Pharmacy | 12-2-6-5-5-51    | x | 09-Feb-13 |
| 6-51   | Pharmacy | 14-2-5-6-6-51    | x | 06-Feb-13 |
| 22-51  | PMV      | 14-2-5-22-22-51  | x | 07-Feb-13 |
| 25-51  | Pharmacy | 14-2-5-25-25-51  | x | 06-Feb-13 |
| 8-51   | Pharmacy | 14-3-1-8-8-51    | x | 05-Jan-13 |
| 10-49  | Pharmacy | 14-3-1-10-10-49  | x | 05-Jan-13 |
| 14-51  | Pharmacy | 14-3-1-14-14-51  | x | 05-Jan-13 |
| 21-51  | Pharmacy | 14-3-1-21-21-51  | x | 09-Feb-13 |
| 31-51  | PMV      | 14-3-1-31-31-51  | x | 07-Feb-13 |
| 37-51  | Pharmacy | 14-3-1-37-37-51  | x | 09-Feb-13 |
| 53-51  | PMV      | 14-3-1-53-53-51  | x | 07-Feb-13 |
| 59-51  | Pharmacy | 14-3-1-59-59-51  | x | 08-Feb-13 |
| 62-51  | Pharmacy | 14-3-1-62-62-51  | x | 08-Feb-13 |
| 1-51   | Pharmacy | 14-3-2-1-1-51    | x | 06-Jan-13 |
| 8-51   | Pharmacy | 15-2-4-8-8-51    | x | 06-Feb-13 |
| 11-51  | Pharmacy | 15-2-4-11-11-51  | x | 05-Feb-13 |
| 25-51  | PMV      | 15-2-4-25-25-51  | x | 07-Feb-13 |
| 34-51  | PMV      | 15-2-4-34-34-51  | x | 08-Feb-13 |
| 36-51  | PMV      | 15-2-4-36-36-51  | x | 06-Feb-13 |
| 42-51  | PMV      | 15-2-4-42-42-51  | x | 05-Feb-13 |
| 44-51  | PMV      | 15-2-4-44-44-51  | x | 05-Feb-13 |
| 10-51  | PMV      | 16-3-1-10-10-51  | x | 06-Feb-13 |
| 74-49  | PMV      | 16-3-1-74-74-49  | x | 09-Feb-13 |
| 75-51  | PMV      | 16-3-1-75-75-51  | x | 06-Feb-13 |
| 76-50  | PMV      | 16-3-1-76-76-50  | x | 09-Feb-13 |
| 5-51   | PMV      | 16-3-2-5-5-51    | x | 08-Feb-13 |
| 5-49   | PMV      | 16-3-3-5-5-49    | x | 08-Feb-13 |
| 15-51  | Pharmacy | 17-1-2-15-15-51  | x | 07-Feb-13 |
| 19-51  | Pharmacy | 17-1-2-19-19-51  | x | 08-Feb-13 |
| 36-51  | PMV      | 17-1-2-36-36-51  | x | 08-Feb-13 |
| 39-51  | PMV      | 17-1-2-39-39-51  | x | 05-Feb-13 |
| 46-51  | PMV      | 17-1-2-46-46-51  | x | 05-Feb-13 |
| 51-51  | PMV      | 17-1-2-51-51-51  | x | 05-Feb-13 |
| 57-51  | PMV      | 17-1-2-57-57-51  | x | 06-Feb-13 |
| 2-51   | PMV      | 17-1-3-2-2-51    | x | 06-Feb-13 |
| 3-51   | Pharmacy | 17-1-3-3-3-51    | x | 06-Feb-13 |
| 11-67B | Pharmacy | 3-1-3-11-11-67B  | x | 07-Feb-13 |
| 30-67A | Pharmacy | 3-1-3-30-30-67A  | x | 09-Feb-13 |
| 12-67D | Pharmacy | 3-2-5-12-12-67D  | x | 11-Feb-13 |
| 42-67B | Pharmacy | 14-3-1-42-42-67B | x | 06-Feb-13 |
| 9-53   | Pharmacy | 3-1-3-9-9-53     | x | 09-Feb-13 |
| 14-53  | Pharmacy | 3-1-3-14-14-53   | x | 05-Feb-13 |
| 31-53  | Pharmacy | 3-1-3-31-31-53   | x | 08-Feb-13 |
| 34-53  | Pharmacy | 3-1-3-34-34-53   | x | 05-Feb-13 |
| 3-53   | Pharmacy | 3-2-3-3-3-53     | x | 08-Feb-13 |

|        |          |                  |   |           |
|--------|----------|------------------|---|-----------|
| 39-53  | PMV      | 4-1-2-39-39-53   | x | 15-Dec-12 |
| 10-53  | Pharmacy | 4-2-1-10-10-53   | x | 07-Feb-13 |
| 16-53  | Pharmacy | 9-1-1-16-16-53   | x | 06-Feb-13 |
| 20-53  | Pharmacy | 9-1-2-20-20-53   | x | 05-Jan-13 |
| 10-53  | Pharmacy | 12-2-1-10-10-53  | x | 05-Feb-13 |
| 42-53  | Pharmacy | 14-3-1-42-42-53  | x | 06-Feb-13 |
| 83-53  | Pharmacy | 16-3-1-83-83-53  | x | 05-Feb-13 |
| 36-53  | PMV      | 17-1-2-36-36-53  | x | 08-Feb-13 |
| 39-53  | PMV      | 17-1-2-39-39-53  | x | 05-Feb-13 |
| 57-53  | PMV      | 17-1-2-57-57-53  | x | 06-Feb-13 |
| 31-67  | Pharmacy | 3-1-3-31-31-67   | x | 08-Feb-13 |
| 25-67A | Pharmacy | 9-1-2-25-25-67A  | x | 06-Feb-13 |
| 6-67A  | Pharmacy | 14-2-5-6-6-67A   | x | 06-Feb-13 |
| 4-67E  | Pharmacy | 15-2-4-4-4-67E   | x | 07-Feb-13 |
| 15-67  | Pharmacy | 17-1-2-15-15-67  | x | 07-Feb-13 |
| 2-55   | PMV      | 17-1-3-2-2-55    | x | 06-Feb-13 |
| 11-56  | Pharmacy | 3-1-3-11-11-56   | x | 07-Feb-13 |
| 30-56  | PMV      | 4-2-3-30-30-56   | x | 05-Feb-13 |
| 31-56  | PMV      | 11-3-7-31-31-56  | x | 07-Feb-13 |
| 6-56   | Pharmacy | 14-2-5-6-6-56    | x | 06-Feb-13 |
| 8-56   | Pharmacy | 14-3-1-8-8-56    | x | 05-Jan-13 |
| 4-56   | Pharmacy | 15-2-4-4-4-56    | x | 07-Feb-13 |
| 34-56  | PMV      | 15-2-4-34-34-56  | x | 08-Feb-13 |
| 42-56  | PMV      | 15-2-4-42-42-56  | x | 05-Feb-13 |
| 76-56  | PMV      | 16-3-1-76-76-56  | x | 09-Feb-13 |
| 2-56   | PMV      | 17-1-3-2-2-56    | x | 06-Feb-13 |
| 21-61  | Pharmacy | 3-1-3-21-21-61   | x | 07-Feb-13 |
| 31-61  | PMV      | 4-2-3-31-31-61   | x | 05-Feb-13 |
| 38-61  | Pharmacy | 4-2-3-38-38-61   | x | 05-Feb-13 |
| 44-61  | PMV      | 5-1-2-44-44-61   | x | 15-Dec-12 |
| 9-61   | Pharmacy | 11-3-7-9-9-61    | x | 05-Feb-13 |
| 42-61  | Pharmacy | 14-3-1-42-42-61  | x | 06-Feb-13 |
| 10-61  | PMV      | 16-3-1-10-10-61  | x | 06-Feb-13 |
| 32-62  | Pharmacy | 3-1-3-32-32-62   | x | 08-Feb-13 |
| 16-62  | Pharmacy | 4-2-3-16-16-62   | x | 06-Feb-13 |
| 9-62   | Pharmacy | 11-3-7-9-9-62    | x | 05-Feb-13 |
| 12-62  | PMV      | 11-3-7-12-12-62  | x | 06-Feb-13 |
| 15-62  | PMV      | 12-2-1-15-15-62  | x | 06-Feb-13 |
| 17-62  | PMV      | 12-2-1-17-17-62  | x | 06-Feb-13 |
| 28-62  | PMV      | 12-2-1-28-28-62  | x | 05-Feb-13 |
| 14-62  | PMV      | 15-2-4-14-14-62  | x | 06-Feb-13 |
| 6-62   | Pharmacy | 14-2-5-6-6-62    | x | 06-Feb-13 |
| 33-66  | Pharmacy | 3-1-3-33-33-66   | x | 07-Feb-13 |
| 10-66  | Pharmacy | 4-2-1-10-10-66   | x | 07-Feb-13 |
| 18-66  | Pharmacy | 9-1-2-18-18-66   | x | 05-Feb-13 |
| 10-66  | Pharmacy | 12-2-1-10-10-66  | x | 04-Feb-13 |
| 6-66   | PMV      | 12-2-6-6-6-66    | x | 06-Feb-13 |
| 1-66   | Pharmacy | 14-3-2-1-1-66    | x | 06-Jan-13 |
| 39-67  | PMV      | 15-2-4-39-39-67  | x | 05-Feb-13 |
| 22-67B | Pharmacy | 17-1-2-22-22-67B | x | 05-Feb-13 |

|        |          |                  |   |           |
|--------|----------|------------------|---|-----------|
| 10-17  | Pharmacy | 3-1-3-10-10-17   | x | 06-Feb-13 |
| 26-17  | PMV      | 3-1-3-26-26-17   | x | 08-Feb-13 |
| 27-17  | PMV      | 3-1-3-27-27-17   | x | 08-Feb-13 |
| 33-17  | Pharmacy | 3-1-3-33-33-17   | x | 07-Feb-13 |
| 34-17  | Pharmacy | 3-1-3-34-34-17   | x | 05-Feb-13 |
| 16-17  | Pharmacy | 4-2-3-16-16-17   | x | 06-Feb-13 |
| 20-16  | PMV      | 4-2-3-20-20-16   | x | 06-Feb-13 |
| 5-17   | PMV      | 9-1-1-5-05-17    | x | 07-Feb-13 |
| 19-17  | Pharmacy | 9-1-2-19-19-17   | x | 05-Feb-13 |
| 22-17  | Pharmacy | 9-1-2-22-22-17   | x | 05-Feb-13 |
| 28-17  | Pharmacy | 9-1-2-28-28-17   | x | 05-Feb-13 |
| 2-17   | Pharmacy | 12-2-1-2-02-17   | x | 06-Feb-13 |
| 14-17  | PMV      | 12-2-1-14-14-17  | x | 06-Feb-13 |
| 1-17A  | Pharmacy | 12-2-6-1-01-17A  | x | 08-Feb-13 |
| 5-17   | Pharmacy | 12-2-6-5-05-17   | x | 09-Feb-13 |
| 2-17   | Pharmacy | 14-2-5-2-02-17   | x | 06-Feb-13 |
| 10-17A | Pharmacy | 14-3-1-10-10-17A | x | 05-Jan-13 |
| 31-17  | PMV      | 14-3-1-31-31-17  | x | 07-Feb-13 |
| 37-17  | Pharmacy | 14-3-1-37-37-17  | x | 09-Feb-13 |
| 1-17   | Pharmacy | 14-3-2-1-01-17   | x | 06-Jan-13 |
| 7-17   | Pharmacy | 15-2-4-7-07-17   | x | 06-Feb-13 |
| 17-17  | PMV      | 15-2-4-17-17-17  | x | 07-Feb-13 |
| 22-17  | PMV      | 15-2-4-22-22-17  | x | 08-Feb-13 |
| 39-17  | PMV      | 15-2-4-39-39-17  | x | 05-Feb-13 |
| 10-17  | PMV      | 16-3-1-10-10-17  | x | 06-Feb-13 |
| 69-17  | PMV      | 16-3-1-69-69-17  | x | 09-Feb-13 |
| 72-17  | PMV      | 16-3-1-72-72-17  | x | 09-Feb-13 |
| 18-17  | Pharmacy | 17-1-2-18-18-17  | x | 05-Feb-13 |
| 19-17  | Pharmacy | 17-1-2-19-19-17  | x | 08-Jan-13 |
| 36-17  | PMV      | 17-1-2-36-36-17  | x | 08-Feb-13 |
| 39-17  | PMV      | 17-1-2-39-39-17  | x | 05-Feb-13 |
| 46-17  | PMV      | 17-1-2-46-46-17  | x | 05-Feb-13 |
| 51-17B | PMV      | 17-1-2-51-51-17B | x | 05-Feb-13 |
| 57-17  | PMV      | 17-1-2-57-57-17  | x | 06-Feb-13 |
| 59-17  | Pharmacy | 17-1-2-59-59-17  | x | 07-Feb-13 |
| 30-42  | Pharmacy | 3-1-3-30-30-42   | x | 09-Feb-13 |
| 33-42  | PMV      | 17-1-2-33-33-42  | x | 05-Feb-13 |
| 16-43  | Pharmacy | 9-1-1-16-16-43   | x | 06-Feb-13 |
| 59-43  | Pharmacy | 17-1-2-59-59-43  | x | 07-Feb-13 |
| 10-65  | Pharmacy | 3-1-3-10-10-65   | x | 06-Feb-13 |
| 19-65  | Pharmacy | 9-1-2-19-19-65   | x | 05-Feb-13 |
| 1-65   | Pharmacy | 12-2-1-1-01-65   | x | 05-Feb-13 |
| 18-67B | Pharmacy | 9-1-2-18-18-67B  | x | 05-Feb-13 |
| 9-7    | Pharmacy | 3-1-3-9-09-07    | x | 09-Feb-13 |
| 10-8   | Pharmacy | 3-1-3-10-10-08   | x | 06-Feb-13 |
| 45-7   | PMV      | 4-1-2-45-45-07   | x | 15-Dec-12 |
| 10-8   | PMV      | 9-1-1-10-10-08   | x | 06-Feb-13 |
| 7-8    | Pharmacy | 15-2-4-7-07-08   | x | 06-Feb-13 |
| 30-7   | Pharmacy | 3-1-3-30-30-07   | x | 09-Feb-13 |
| 33-67A | PMV      | 17-1-2-33-33-67A | x | 05-Feb-13 |

|        |          |                  |   |           |
|--------|----------|------------------|---|-----------|
| 42-67C | PMV      | 5-1-2-42-42-67C  | x | 15-Dec-12 |
| 45-67B | PMV      | 4-1-2-45-45-67B  | x | 15-Dec-12 |
| 4-67I  | Pharmacy | 15-2-4-4-04-67I  | x | 07-Feb-13 |
| 7-33   | Pharmacy | 3-1-3-7-07-33    | x | 05-Feb-13 |
| 26-64  | PMV      | 3-1-3-26-26-64   | x | 08-Feb-13 |
| 31-64  | Pharmacy | 3-1-3-31-31-64   | x | 08-Feb-13 |
| 6-64   | Pharmacy | 3-2-3-6-06-64    | x | 11-Feb-13 |
| 21-64  | PMV      | 4-2-3-21-21-64   | x | 05-Feb-13 |
| 26-64  | PMV      | 4-2-3-26-26-64   | x | 06-Feb-13 |
| 30-64  | PMV      | 4-2-3-30-30-64   | x | 05-Feb-13 |
| 20-64  | PMV      | 11-3-5-20-20-64  | x | 06-Feb-13 |
| 1-64   | Pharmacy | 11-3-7-1-01-64   | x | 05-Feb-13 |
| 15-64  | PMV      | 12-2-1-15-15-64  | x | 06-Feb-13 |
| 28-64  | PMV      | 12-2-1-28-28-64  | x | 05-Feb-13 |
| 14-64  | Pharmacy | 14-3-1-14-14-64  | x | 05-Jan-13 |
| 53-64  | PMV      | 14-3-1-53-53-64  | x | 07-Feb-13 |
| 4-64   | Pharmacy | 15-2-4-4-04-64   | x | 07-Feb-13 |
| 7-64   | Pharmacy | 15-2-4-7-07-64   | x | 06-Feb-13 |
| 17-64  | PMV      | 15-2-4-17-17-64  | x | 07-Feb-13 |
| 22-64  | PMV      | 15-2-4-22-22-64  | x | 08-Feb-13 |
| 27-64  | PMV      | 15-2-4-27-27-64  | x | 07-Feb-13 |
| 39-64  | PMV      | 15-2-4-39-39-64  | x | 05-Feb-13 |
| 42-64  | PMV      | 15-2-4-42-42-64  | x | 05-Feb-13 |
| 10-64  | PMV      | 16-3-1-10-10-64  | x | 06-Feb-13 |
| 5-64   | PMV      | 16-3-2-5-05-64   | x | 08-Feb-13 |
| 63-64  | PMV      | 16-3-3-63-63-64  | x | 08-Feb-13 |
| 18-64  | Pharmacy | 17-1-2-18-18-64  | x | 05-Feb-13 |
| 2-64   | PMV      | 17-1-3-2-02-64   | x | 06-Feb-13 |
| 26-65  | PMV      | 3-1-3-26-26-65   | x | 08-Feb-13 |
| 45-64  | PMV      | 4-1-2-45-45-64   | x | 15-Dec-12 |
| 1-64   | Pharmacy | 12-2-1-1-01-64   | x | 05-Feb-13 |
| 51-17A | PMV      | 17-1-2-51-51-17A | x | 05-Feb-13 |
| 28-67  | PMV      | 11-3-7-28-28-67  | x | 05-Feb-13 |
| 19-67  | Pharmacy | 17-1-2-19-19-67  | x | 08-Jan-13 |
| 6-67C  | PMV      | 12-2-6-6-06-67C  | x | 06-Feb-13 |
| 7-20   | Pharmacy | 3-1-3-7-07-20    | x | 05-Feb-13 |
| 10-20  | Pharmacy | 3-1-3-10-10-20   | x | 06-Feb-13 |
| 14-20  | Pharmacy | 3-1-3-14-14-20   | x | 05-Feb-13 |
| 30-20  | Pharmacy | 3-1-3-30-30-20   | x | 09-Feb-13 |
| 31-20  | Pharmacy | 3-1-3-31-31-20   | x | 08-Feb-13 |
| 1-20   | Pharmacy | 4-2-3-1-01-20    | x | 05-Feb-13 |
| 37-20  | PMV      | 4-2-3-37-37-20   | x | 06-Feb-13 |
| 28-20  | PMV      | 11-3-7-28-28-20  | x | 05-Feb-13 |
| 1-20   | Pharmacy | 12-2-6-1-01-20   | x | 08-Feb-13 |
| 6-20   | PMV      | 12-2-6-6-06-20   | x | 06-Feb-13 |
| 2-20   | Pharmacy | 14-2-5-2-02-20   | x | 06-Feb-13 |
| 6-19   | Pharmacy | 14-2-5-6-06-19   | x | 06-Feb-13 |
| 1-20   | Pharmacy | 14-3-2-1-01-20   | x | 06-Jan-13 |
| 39-20  | PMV      | 15-2-4-39-39-20  | x | 05-Feb-13 |
| 59-20  | Pharmacy | 17-1-2-59-59-20  | x | 07-Feb-13 |

|        |          |                 |   |           |
|--------|----------|-----------------|---|-----------|
| 3-20   | Pharmacy | 17-1-3-3-03-20  | x | 06-Feb-13 |
| 7-22   | Pharmacy | 3-1-3-7-07-22   | x | 05-Feb-13 |
| 10-22  | Pharmacy | 3-1-3-10-10-22  | x | 06-Feb-13 |
| 14-22  | Pharmacy | 3-1-3-14-14-22  | x | 05-Feb-13 |
| 1-22   | Pharmacy | 12-2-6-1-01-22  | x | 08-Feb-13 |
| 59-22  | Pharmacy | 17-1-2-59-59-22 | x | 07-Feb-13 |
| 21-67B | Pharmacy | 3-1-3-21-21-67B | x | 07-Feb-13 |
| 12-67A | Pharmacy | 3-2-5-12-12-67A | x | 11-Feb-13 |
| 11-33  | Pharmacy | 3-1-3-11-11-33  | x | 07-Feb-13 |
| 28-33  | PMV      | 11-3-7-28-28-33 | x | 05-Feb-13 |
| 77-33  | PMV      | 16-3-1-77-77-33 | x | 06-Feb-13 |
| 11-15  | Pharmacy | 3-1-3-11-11-15  | x | 07-Feb-13 |
| 3-14   | Pharmacy | 3-2-3-3-03-14   | x | 08-Feb-13 |
| 27-15  | Pharmacy | 12-2-1-27-27-15 | x | 06-Feb-13 |
| 1-15   | Pharmacy | 12-2-6-1-01-15  | x | 08-Feb-13 |
| 59-14  | Pharmacy | 17-1-2-59-59-14 | x | 07-Feb-13 |
| 9-14   | Pharmacy | 3-1-3-9-09-14   | x | 09-Feb-13 |
| 21-14  | Pharmacy | 3-1-3-21-21-14  | x | 07-Feb-13 |
| 33-14  | Pharmacy | 3-1-3-33-33-14  | x | 07-Feb-13 |
| 34-14  | Pharmacy | 3-1-3-34-34-14  | x | 05-Feb-13 |
| 6-14   | Pharmacy | 3-2-3-6-06-14   | x | 11-Feb-13 |
| 28-14  | Pharmacy | 9-1-2-28-28-14  | x | 05-Feb-13 |
| 25-14  | PMV      | 11-3-7-25-25-14 | x | 08-Feb-13 |
| 28-14  | PMV      | 11-3-7-28-28-14 | x | 05-Feb-13 |
| 14-14  | PMV      | 12-2-1-14-14-14 | x | 06-Feb-13 |
| 27-14  | Pharmacy | 12-2-1-27-27-14 | x | 06-Feb-13 |
| 1-14   | Pharmacy | 12-2-6-1-01-14  | x | 08-Feb-13 |
| 5-14   | Pharmacy | 12-2-6-5-05-14  | x | 09-Feb-13 |
| 2-14   | Pharmacy | 14-2-5-2-02-14  | x | 06-Feb-13 |
| 14-14  | Pharmacy | 14-3-1-14-14-14 | x | 05-Jan-13 |
| 77-14  | PMV      | 16-3-1-77-77-14 | x | 06-Feb-13 |
| 18-14  | Pharmacy | 17-1-2-18-18-14 | x | 05-Feb-13 |
| 36-14  | PMV      | 17-1-2-36-36-14 | x | 08-Feb-13 |
| 57-14  | PMV      | 17-1-2-57-57-14 | x | 06-Feb-13 |
| 3-14   | Pharmacy | 17-1-3-3-03-14  | x | 06-Feb-13 |
| 33-61  | Pharmacy | 3-1-3-33-33-61  | x | 07-Feb-13 |
| 1-38   | Pharmacy | 12-2-6-1-01-38  | x | 08-Feb-13 |
| 33-54  | Pharmacy | 3-1-3-33-33-54  | x | 07-Feb-13 |
| 6-67B  | PMV      | 12-2-6-6-06-67B | x | 06-Feb-13 |
| 57-67  | PMV      | 17-1-2-57-57-67 | x | 06-Feb-13 |
| 7-24   | Pharmacy | 3-1-3-7-07-24   | x | 05-Feb-13 |
| 31-24  | Pharmacy | 3-1-3-31-31-24  | x | 08-Feb-13 |
| 34-24  | Pharmacy | 3-1-3-34-34-24  | x | 05-Feb-13 |
| 1-24   | Pharmacy | 12-2-6-1-01-24  | x | 08-Feb-13 |
| 2-24   | Pharmacy | 14-2-5-2-02-24  | x | 06-Feb-13 |
| 59-24  | Pharmacy | 14-3-1-59-59-24 | x | 08-Feb-13 |
| 9-24   | Pharmacy | 1-1-3-9-9-24    | x | 09-Feb-13 |
| 11-24  | Pharmacy | 3-1-3-11-11-24  | x | 07-Feb-13 |
| 30-24  | Pharmacy | 3-1-3-30-30-24  | x | 09-Feb-13 |
| 33-24  | Pharmacy | 3-1-3-33-33-24  | x | 07-Feb-13 |



|       |          |                 |   |           |
|-------|----------|-----------------|---|-----------|
| 6-24  | Pharmacy | 3-2-3-6-06-24   | x | 11-Feb-13 |
| 12-24 | Pharmacy | 3-2-5-12-12-24  | x | 11-Feb-13 |
| 10-50 | Pharmacy | 4-2-1-10-10-50  | x | 07-Feb-13 |
| 16-24 | Pharmacy | 4-2-3-16-16-24  | x | 06-Feb-13 |
| 30-24 | PMV      | 4-2-3-30-30-24  | x | 05-Feb-13 |
| 27-24 | Pharmacy | 12-2-1-27-27-24 | x | 06-Feb-13 |
| 28-24 | PMV      | 11-3-7-28-28-24 | x | 05-Feb-13 |
| 1-24  | Pharmacy | 12-2-6-1-01-24  | x | 08-Feb-13 |
| 77-24 | PMV      | 16-3-1-77-77-24 | x | 06-Feb-13 |
| 59-24 | Pharmacy | 17-1-2-59-59-24 | x | 07-Feb-13 |
| 3-24  | Pharmacy | 17-1-3-3-03-24  | x | 06-Feb-13 |
| 51-1  | PMV      | 17-1-2-51-51-1  | x | 05-Feb-13 |
| 7-63  | Pharmacy | 3-1-3-7-7-63    | x | 05-Feb-13 |
| 9-63  | Pharmacy | 3-1-3-9-9-63    | x | 09-Feb-13 |
| 10-63 | Pharmacy | 3-1-3-10-10-63  | x | 06-Feb-13 |
| 11-63 | Pharmacy | 3-1-3-11-11-63  | x | 07-Feb-13 |
| 21-63 | Pharmacy | 3-1-3-21-21-63  | x | 07-Feb-13 |
| 26-63 | PMV      | 3-1-3-26-26-63  | x | 08-Feb-13 |
| 27-63 | PMV      | 3-1-3-27-27-63  | x | 08-Feb-13 |
| 32-63 | Pharmacy | 3-1-3-32-32-63  | x | 08-Feb-13 |
| 34-63 | Pharmacy | 3-1-3-34-34-63  | x | 05-Feb-13 |
| 13-63 | Pharmacy | 4-1-2-13-13-63  | x | 15-Dec-12 |
| 39-63 | PMV      | 4-1-2-39-39-63  | x | 15-Dec-12 |
| 40-63 | PMV      | 4-1-2-40-40-63  | x | 15-Dec-12 |
| 43-63 | PMV      | 4-1-2-43-43-63  | x | 15-Dec-12 |
| 45-63 | PMV      | 4-1-2-45-45-63  | x | 15-Dec-12 |
| 10-63 | Pharmacy | 4-2-1-10-10-63  | x | 07-Feb-13 |
| 1-63  | Pharmacy | 4-2-3-1-1-63    | x | 05-Feb-13 |
| 16-63 | Pharmacy | 4-2-3-16-16-63  | x | 06-Feb-13 |
| 20-63 | PMV      | 4-2-3-20-20-63  | x | 06-Feb-13 |
| 24-63 | PMV      | 4-2-3-24-24-63  | x | 06-Feb-13 |
| 26-63 | PMV      | 4-2-3-26-26-63  | x | 06-Feb-13 |
| 37-63 | PMV      | 4-2-3-37-37-63  | x | 06-Feb-13 |
| 44-63 | PMV      | 5-1-2-44-44-63  | x | 15-Dec-12 |
| 5-63  | PMV      | 9-1-1-5-5-63    | x | 07-Feb-13 |
| 7-63  | PMV      | 9-1-1-7-7-63    | x | 06-Feb-13 |
| 10-63 | PMV      | 9-1-1-10-10-63  | x | 06-Feb-13 |
| 25-63 | Pharmacy | 9-1-2-25-25-63  | x | 06-Feb-13 |
| 28-63 | Pharmacy | 9-1-2-28-28-63  | x | 05-Feb-13 |
| 20-63 | PMV      | 11-3-5-20-20-63 | x | 06-Feb-13 |
| 1-63  | Pharmacy | 11-3-7-1-1-63   | x | 05-Feb-13 |
| 4-63  | PMV      | 11-3-7-4-4-63   | x | 06-Feb-13 |
| 25-63 | PMV      | 11-3-7-25-25-63 | x | 08-Feb-13 |
| 28-63 | PMV      | 11-3-7-28-28-63 | x | 05-Feb-13 |
| 33-63 | PMV      | 11-3-7-33-33-63 | x | 06-Feb-13 |
| 2-63  | Pharmacy | 12-2-1-2-2-63   | x | 06-Feb-13 |
| 10-63 | Pharmacy | 12-2-1-10-10-63 | x | 05-Feb-13 |
| 14-63 | PMV      | 12-2-1-14-14-63 | x | 06-Feb-13 |
| 15-63 | PMV      | 12-2-1-15-15-63 | x | 06-Feb-13 |
| 1-63  | Pharmacy | 12-2-6-1-1-63   | x | 08-Feb-13 |

|        |          |                  |   |           |
|--------|----------|------------------|---|-----------|
| 5-63   | Pharmacy | 12-2-6-5-5-63    | x | 09-Feb-13 |
| 2-63   | Pharmacy | 14-2-5-2-2-63    | x | 06-Feb-13 |
| 6-63   | Pharmacy | 14-2-5-6-6-63    | x | 06-Feb-13 |
| 22-63  | PMV      | 14-2-5-22-22-63  | x | 07-Feb-13 |
| 25-63  | Pharmacy | 14-2-5-25-25-63  | x | 06-Feb-13 |
| 8-63   | Pharmacy | 14-3-1-8-8-63    | x | 05-Jan-13 |
| 10-63  | Pharmacy | 14-3-1-10-10-63  | x | 05-Jan-13 |
| 21-63  | Pharmacy | 14-3-1-21-21-63  | x | 09-Feb-13 |
| 37-63  | Pharmacy | 14-3-1-37-37-63  | x | 09-Feb-13 |
| 53-63  | PMV      | 14-3-1-53-53-63  | x | 07-Feb-13 |
| 59-63  | Pharmacy | 14-3-1-59-59-63  | x | 08-Feb-13 |
| 1-63   | Pharmacy | 14-3-2-1-1-63    | x | 06-Jan-13 |
| 7-63   | Pharmacy | 15-2-4-7-7-63    | x | 06-Feb-13 |
| 8-63   | Pharmacy | 15-2-4-8-8-63    | x | 06-Feb-13 |
| 11-63  | Pharmacy | 15-2-4-11-11-63  | x | 05-Feb-13 |
| 14-63  | PMV      | 15-2-4-14-14-63  | x | 06-Feb-13 |
| 22-63  | PMV      | 15-2-4-22-22-63  | x | 08-Feb-13 |
| 23-63  | PMV      | 15-2-4-23-23-63  | x | 07-Feb-13 |
| 25-63  | PMV      | 15-2-4-25-25-63  | x | 07-Feb-13 |
| 39-63  | PMV      | 15-2-4-39-39-63  | x | 05-Feb-13 |
| 164-63 | PMV      | 15-2-4-44-164-63 | x | 05-Feb-13 |
| 74-63  | PMV      | 16-3-1-74-74-63  | x | 09-Feb-13 |
| 80-63  | PMV      | 16-3-1-80-80-63  | x | 06-Feb-13 |
| 83-63  | Pharmacy | 16-3-1-83-83-63  | x | 05-Feb-13 |
| 5-63   | PMV      | 16-3-3-5-5-63    | x | 08-Feb-13 |
| 15-63  | Pharmacy | 17-1-2-15-15-63  | x | 07-Feb-13 |
| 33-63  | PMV      | 17-1-2-33-33-63  | x | 05-Feb-13 |
| 36-63  | PMV      | 17-1-2-36-36-63  | x | 08-Feb-13 |
| 39-63  | PMV      | 17-1-2-39-39-63  | x | 05-Feb-13 |
| 57-63  | PMV      | 17-1-2-57-57-63  | x | 06-Feb-13 |
| 3-63   | Pharmacy | 17-1-3-3-3-63    | x | 06-Feb-13 |
| 43-67B | PMV      | 4-1-2-43-43-67B  | x | 15-Dec-12 |
| 22-67A | Pharmacy | 17-1-2-22-22-67A | x | 05-Feb-13 |
| 20-67  | Pharmacy | 9-1-2-20-20-67   | x | 05-Jan-13 |
| 17-67  | PMV      | 12-2-1-17-17-67  | x | 06-Feb-13 |
| 59-67  | Pharmacy | 14-3-1-59-59-67  | x | 08-Feb-13 |
| 42-67D | PMV      | 5-1-2-42-42-67D  | x | 15-Dec-12 |
| 7-67   | Pharmacy | 3-1-3-7-7-67     | x | 05-Feb-13 |
| 1-67A  | Pharmacy | 12-2-6-1-1-67A   | x | 08-Feb-13 |
| 62-67  | Pharmacy | 14-3-7-62-62-67  | x | 08-Feb-13 |
| 25-67B | PMV      | 15-2-4-25-25-67B | x | 07-Feb-13 |
| 22-67C | Pharmacy | 17-1-2-22-22-67C | x | 05-Feb-13 |
| 10-57  | Pharmacy | 3-1-3-10-10-57   | x | 06-Feb-13 |
| 14-57  | Pharmacy | 3-1-3-14-14-57   | x | 05-Feb-13 |
| 21-57  | Pharmacy | 3-1-3-21-21-57   | x | 07-Feb-13 |
| 27-57  | PMV      | 3-1-3-27-27-57   | x | 08-Feb-13 |
| 30-57  | Pharmacy | 3-1-3-30-30-57   | x | 09-Feb-13 |
| 34-57  | Pharmacy | 3-1-3-34-34-57   | x | 05-Feb-13 |
| 12-57  | Pharmacy | 3-2-5-12-12-57   | x | 11-Feb-13 |
| 43-57  | PMV      | 4-1-2-43-43-57   | x | 15-Dec-12 |

|        |          |                 |   |           |
|--------|----------|-----------------|---|-----------|
| 10-57  | Pharmacy | 4-2-1-10-10-57  | x | 07-Feb-13 |
| 8-57   | Pharmacy | 4-2-3-8-8-57    | x | 05-Feb-13 |
| 20-67B | PMV      | 4-2-3-20-20-67B | x | 06-Feb-13 |
| 21-57  | PMV      | 4-2-3-21-21-57  | x | 05-Feb-13 |
| 6-57   | PMV      | 9-1-1-6-6-57    | x | 07-Feb-13 |
| 16-57  | Pharmacy | 9-1-1-16-16-57  | x | 06-Feb-13 |
| 19-57  | Pharmacy | 9-1-2-19-19-57  | x | 05-Feb-13 |
| 29-57  | Pharmacy | 9-1-2-29-29-57  | x | 05-Feb-13 |
| 20-57  | PMV      | 11-3-5-20-20-57 | x | 06-Feb-13 |
| 1-57   | Pharmacy | 11-3-7-1-1-57   | x | 05-Feb-13 |
| 28-57  | PMV      | 11-3-7-28-28-57 | x | 05-Feb-13 |
| 33-57  | PMV      | 11-3-7-33-33-57 | x | 06-Feb-13 |
| 2-56   | Pharmacy | 12-2-1-2-2-56   | x | 06-Feb-13 |
| 14-57  | PMV      | 12-2-1-14-14-57 | x | 06-Feb-13 |
| 28-57  | PMV      | 12-2-1-28-28-57 | x | 05-Feb-13 |
| 1-57   | Pharmacy | 12-2-6-1-1-57   | x | 08-Feb-13 |
| 2-57   | Pharmacy | 14-2-5-2-2-57   | x | 06-Feb-13 |
| 6-57   | Pharmacy | 14-2-5-6-6-57   | x | 06-Feb-13 |
| 37-57  | Pharmacy | 14-3-1-37-37-57 | x | 09-Feb-13 |
| 59-56  | Pharmacy | 14-3-1-59-59-56 | x | 08-Feb-13 |
| 1-57   | Pharmacy | 14-3-2-1-1-57   | x | 06-Jan-13 |
| 8-57   | Pharmacy | 15-2-4-8-8-57   | x | 06-Feb-13 |
| 14-57  | PMV      | 15-2-4-14-14-57 | x | 06-Feb-13 |
| 22-57  | PMV      | 15-2-4-22-22-57 | x | 08-Feb-13 |
| 25-57  | PMV      | 15-2-4-25-25-57 | x | 07-Feb-13 |
| 36-57  | PMV      | 15-2-4-36-36-57 | x | 06-Feb-13 |
| 42-57  | PMV      | 15-2-4-42-42-57 | x | 05-Feb-13 |
| 77-57  | PMV      | 16-3-1-77-77-57 | x | 06-Feb-13 |
| 83-57  | Pharmacy | 16-3-1-83-83-57 | x | 05-Feb-13 |
| 5-57   | PMV      | 16-3-2-5-5-57   | x | 08-Feb-13 |
| 15-57  | Pharmacy | 17-1-2-15-15-57 | x | 07-Feb-13 |
| 19-57  | Pharmacy | 17-1-2-19-19-57 | x | 08-Jan-13 |
| 22-57  | Pharmacy | 17-1-2-22-22-57 | x | 05-Feb-13 |
| 36-19  | PMV      | 17-1-2-36-36-19 | x | 08-Feb-13 |
| 46-57  | PMV      | 17-1-2-46-46-57 | x | 05-Feb-13 |
| 57-57  | PMV      | 17-1-2-57-57-57 | x | 06-Feb-13 |
| 59-57  | Pharmacy | 17-1-2-59-59-57 | x | 07-Feb-13 |
| 2-57   | PMV      | 17-1-3-2-2-57   | x | 06-Feb-13 |
| 3-57   | Pharmacy | 17-1-3-3-3-57   | x | 06-Feb-13 |
| 1-69   | Pharmacy | 11-3-6-1-1-69   | x | 07-Feb-13 |
| 10-67D | Pharmacy | 3-1-3-10-10-67D | x | 06-Feb-13 |
| 16-67  | Pharmacy | 4-2-3-16-16-67  | x | 06-Feb-13 |
| 6-67D  | PMV      | 12-2-6-6-6-67D  | x | 06-Feb-13 |
| 4-67A  | Pharmacy | 15-2-4-4-4-67A  | x | 07-Feb-13 |
| 4-67J  | Pharmacy | 15-2-4-4-4-67J  | x | 07-Feb-13 |
| 4-67G  | Pharmacy | 15-2-4-4-4-67G  | x | 07-Feb-13 |
| 31-67  | PMV      | 11-3-7-31-31-67 | x | 07-Feb-13 |
| 33-67  | PMV      | 11-3-7-33-33-67 | x | 06-Feb-13 |
| 9-67   | Pharmacy | 3-1-3-9-9-67    | x | 09-Feb-13 |
| 14-3   | Pharmacy | 3-1-3-14-14-3   | x | 05-Feb-13 |

|        |          |                  |   |           |
|--------|----------|------------------|---|-----------|
| 37-67  | PMV      | 4-2-3-37-37-67   | x | 06-Feb-13 |
| 5-2    | Pharmacy | 12-2-6-5-5-2     | x | 09-Feb-13 |
| 8-3    | Pharmacy | 14-3-1-8-8-3     | x | 05-Jan-13 |
| 83-67  | Pharmacy | 16-3-1-83-83-67  | x | 05-Feb-13 |
| 5-67B  | Pharmacy | 12-2-6-5-5-67B   | x | 09-Feb-13 |
| 10-67B | Pharmacy | 3-1-3-10-10-67B  | x | 06-Feb-13 |
| 10-67  | Pharmacy | 4-2-1-10-10-67   | x | 07-Feb-13 |
| 10-67  | Pharmacy | 12-2-1-10-10-67  | x | 05-Feb-13 |
| 3-0    | Pharmacy | 3-2-3-3-3-0      | x | 08-Feb-13 |
| 27-12  | Pharmacy | 12-2-1-27-27-12  | x | 06-Feb-13 |
| 30-67B | Pharmacy | 3-1-3-30-30-67B  | x | 09-Feb-13 |
| 10-67B | PMV      | 16-3-1-10-10-67B | x | 06-Feb-13 |
| 6-7    | PMV      | 9-1-1-6-6-7      | x | 07-Feb-13 |
| 29-19  | Pharmacy | 9-1-2-29-29-19   | x | 05-Feb-13 |
| 27-67B | Pharmacy | 12-2-1-27-27-67B | x | 06-Feb-13 |
| 5-67   | Pharmacy | 12-2-6-5-5-67    | x | 09-Feb-13 |
| 10-67C | Pharmacy | 3-1-3-10-10-67C  | x | 06-Feb-13 |
| 11-28  | Pharmacy | 3-1-3-11-11-28   | x | 07-Feb-13 |
| 33-28  | Pharmacy | 3-1-3-33-33-28   | x | 07-Feb-13 |
| 10-28  | Pharmacy | 4-2-1-10-10-28   | x | 07-Feb-13 |
| 16-28  | Pharmacy | 4-2-3-16-16-28   | x | 06-Feb-13 |
| 28-28  | PMV      | 4-2-3-28-28-28   | x | 06-Feb-13 |
| 29-28  | Pharmacy | 9-1-2-29-29-28   | x | 05-Feb-13 |
| 33-28  | PMV      | 11-3-7-33-33-28  | x | 06-Feb-13 |
| 1-28A  | Pharmacy | 12-2-1-1-1-28A   | x | 05-Feb-13 |
| 27-28  | Pharmacy | 12-2-1-27-27-28  | x | 06-Feb-13 |
| 1-28   | Pharmacy | 12-2-6-1-1-28    | x | 06-Feb-13 |
| 2-28   | Pharmacy | 14-2-5-2-2-28    | x | 06-Feb-13 |
| 11-67B | PMV      | 16-3-5-11-11-67B | x | 05-Feb-13 |
| 4-67C  | Pharmacy | 15-2-4-4-4-67C   | x | 07-Feb-13 |
| 11-48A | Pharmacy | 3-1-3-11-11-48A  | x | 07-Feb-13 |
| 13-48  | Pharmacy | 4-1-2-13-13-48   | x | 15-Dec-12 |
| 43-48  | PMV      | 4-1-2-43-43-48   | x | 15-Dec-12 |
| 25-48  | Pharmacy | 9-1-2-25-25-48   | x | 06-Feb-13 |
| 5-56   | Pharmacy | 12-2-6-5-5-56    | x | 09-Feb-13 |
| 43-67A | PMV      | 4-1-2-43-43-67A  | x | 15-Dec-12 |
| 14-67  | PMV      | 12-2-1-14-14-67  | x | 06-Feb-13 |
| 22-67D | Pharmacy | 17-1-2-22-22-67D | x | 05-Feb-13 |
| 8-56   | Pharmacy | 14-3-1-8-8-56    | x | 05-Jan-13 |
| 14-56  | Pharmacy | 14-3-1-14-14-56  | x | 05-Jan-13 |
| 1-56   | Pharmacy | 14-3-2-1-1-56    | x | 06-Jan-13 |
| 38-67B | Pharmacy | 4-2-3-38-38-67B  | x | 05-Feb-13 |
| 83-28  | Pharmacy | 16-3-1-83-83-28  | x | 05-Feb-13 |
| 30-67C | Pharmacy | 3-1-3-30-30-67C  | x | 09-Feb-13 |
| 9-50   | Pharmacy | 3-1-3-9-9-50     | x | 09-Feb-13 |
| 10-50  | Pharmacy | 3-1-3-10-10-50   | x | 06-Feb-13 |
| 11-50  | Pharmacy | 3-1-3-11-11-50   | x | 07-Feb-13 |
| 14-50  | Pharmacy | 3-1-3-14-14-50   | x | 05-Feb-13 |
| 21-50  | Pharmacy | 3-1-3-21-21-50   | x | 07-Feb-13 |
| 27-50  | PMV      | 3-1-3-27-27-50   | x | 08-Feb-13 |

|        |          |                 |   |           |
|--------|----------|-----------------|---|-----------|
| 31-50  | Pharmacy | 3-1-3-31-31-50  | x | 08-Feb-13 |
| 33-50  | Pharmacy | 3-1-3-33-33-50  | x | 07-Feb-13 |
| 34-50  | Pharmacy | 3-1-3-34-34-50  | x | 05-Feb-13 |
| 10-50  | Pharmacy | 4-2-1-10-10-50  | x | 07-Feb-13 |
| 7-50   | PMV      | 9-1-1-7-7-50    | x | 06-Feb-13 |
| 10-50  | PMV      | 9-1-1-10-10-50  | x | 06-Feb-13 |
| 20-50  | Pharmacy | 9-1-2-20-20-50  | x | 05-Feb-13 |
| 29-50  | Pharmacy | 9-1-2-29-29-50  | x | 05-Feb-13 |
| 33-50  | PMV      | 11-3-7-33-33-50 | x | 06-Feb-13 |
| 10-50  | Pharmacy | 12-2-1-10-10-50 | x | 05-Feb-13 |
| 14-50  | PMV      | 12-2-1-14-14-50 | x | 06-Feb-13 |
| 15-50  | PMV      | 12-2-1-15-15-50 | x | 06-Feb-13 |
| 27-50  | Pharmacy | 12-2-1-27-27-50 | x | 06-Feb-13 |
| 28-50  | PMV      | 12-2-1-28-28-50 | x | 05-Feb-13 |
| 2-50   | Pharmacy | 14-2-5-2-2-50   | x | 06-Feb-13 |
| 8-50   | Pharmacy | 14-3-1-8-8-50   | x | 05-Jan-13 |
| 10-50  | Pharmacy | 14-3-1-10-10-50 | x | 05-Jan-13 |
| 14-50  | Pharmacy | 14-3-1-14-14-50 | x | 05-Jan-13 |
| 42-50  | Pharmacy | 14-3-1-42-42-50 | x | 06-Feb-13 |
| 7-50   | Pharmacy | 15-2-4-7-7-50   | x | 06-Feb-13 |
| 8-50   | Pharmacy | 15-2-4-8-8-50   | x | 06-Feb-13 |
| 11-50  | Pharmacy | 15-2-4-11-11-50 | x | 05-Feb-13 |
| 14-50  | PMV      | 15-2-4-14-14-50 | x | 06-Feb-13 |
| 22-50  | PMV      | 15-2-4-22-22-50 | x | 08-Feb-13 |
| 42-50  | PMV      | 15-2-4-42-42-50 | x | 05-Feb-13 |
| 44-50  | PMV      | 15-2-4-44-44-50 | x | 05-Feb-13 |
| 76-50  | PMV      | 16-3-1-76-76-50 | x | 09-Feb-13 |
| 83-49  | Pharmacy | 16-3-1-83-83-49 | x | 05-Feb-13 |
| 42-67A | PMV      | 5-1-2-42-42-67A | x | 15-Dec-12 |
| 6-67A  | PMV      | 12-2-6-6-06-67A | x | 06-Feb-13 |
| 14-21B | Pharmacy | 3-1-3-14-14-21B | x | 05-Feb-13 |
| 30-21  | Pharmacy | 3-1-3-30-30-21  | x | 09-Feb-13 |
| 1-21A  | Pharmacy | 12-2-6-1-01-21A | x | 08-Feb-13 |
| 10-21  | Pharmacy | 3-1-3-10-10-21  | x | 06-Feb-13 |
| 11-21  | Pharmacy | 3-1-3-11-11-21  | x | 07-Feb-13 |
| 14-21A | Pharmacy | 3-1-3-14-14-21A | x | 05-Feb-13 |
| 34-21  | Pharmacy | 3-1-3-34-34-21  | x | 05-Feb-13 |
| 43-21  | PMV      | 4-1-2-43-43-21  | x | 15-Dec-12 |
| 44-21  | PMV      | 5-1-2-44-44-21  | x | 15-Dec-12 |
| 28-21  | Pharmacy | 9-1-2-28-28-21  | x | 05-Feb-13 |
| 1-21B  | Pharmacy | 12-2-6-1-01-21B | x | 08-Feb-13 |
| 9-17   | Pharmacy | 3-1-3-9-09-17   | x | 09-Feb-13 |
| 10-17B | Pharmacy | 3-1-3-10-10-17B | x | 06-Feb-13 |
| 21-17  | Pharmacy | 3-1-3-21-21-17  | x | 07-Feb-13 |
| 33-17B | Pharmacy | 3-1-3-33-33-17B | x | 07-Feb-13 |
| 34-67  | Pharmacy | 3-1-3-34-34-67  | x | 05-Feb-13 |
| 3-11   | Pharmacy | 3-2-3-3-03-11   | x | 08-Feb-13 |
| 43-67  | PMV      | 4-1-2-43-43-67  | x | 15-Dec-12 |
| 51-67  | PMV      | 5-1-2-51-51-67  | x | 15-Dec-12 |
| 10-17  | PMV      | 9-1-1-10-10-17  | x | 06-Feb-13 |

|        |          |                  |   |           |
|--------|----------|------------------|---|-----------|
| 25-17  | Pharmacy | 9-1-2-25-25-17   | x | 06-Feb-13 |
| 1-17   | Pharmacy | 12-2-6-1-01-17   | x | 08-Feb-13 |
| 5-17   | Pharmacy | 12-2-6-5-05-17   | x | 09-Feb-13 |
| 10-17B | Pharmacy | 14-3-1-10-10-17B | x | 05-Jan-13 |
| 14-17  | Pharmacy | 14-3-1-14-14-17  | x | 05-Jan-13 |
| 21-17  | Pharmacy | 14-3-1-21-21-17  | x | 09-Feb-13 |
| 8-67   | Pharmacy | 15-2-4-8-08-67   | x | 06-Feb-13 |
| 14-58  | PMV      | 15-2-4-14-14-58  | x | 05-Feb-13 |
| 27-67  | PMV      | 15-2-4-27-27-67  | x | 07-Feb-13 |
| 3-17   | Pharmacy | 17-1-3-3-03-17   | x | 06-Feb-13 |
| 10-58  | Pharmacy | 3-1-3-10-10-58   | x | 06-Feb-13 |
| 26-58  | PMV      | 3-1-3-26-26-58   | x | 08-Feb-13 |
| 34-58  | Pharmacy | 3-1-3-34-34-58   | x | 05-Feb-13 |
| 12-58  | Pharmacy | 3-2-5-12-12-58   | x | 11-Feb-13 |
| 13-58  | Pharmacy | 4-1-2-13-13-58   | x | 15-Dec-12 |
| 10-58  | Pharmacy | 4-2-1-10-10-58   | x | 07-Feb-13 |
| 8-58   | Pharmacy | 4-2-3-8-08-58    | x | 05-Feb-13 |
| 16-58  | Pharmacy | 4-2-3-16-16-58   | x | 06-Feb-13 |
| 38-27  | Pharmacy | 4-2-3-38-38-27   | x | 05-Feb-13 |
| 6-58   | PMV      | 9-1-1-6-06-58    | x | 07-Feb-13 |
| 16-58  | Pharmacy | 9-1-1-16-16-58   | x | 06-Feb-13 |
| 15-58  | PMV      | 12-2-1-15-15-58  | x | 06-Feb-13 |
| 1-58   | Pharmacy | 12-2-6-1-01-58   | x | 08-Feb-13 |
| 14-58  | PMV      | 15-2-4-14-14-58  | x | 06-Feb-13 |
| 7-58   | Pharmacy | 15-2-4-7-07-58   | x | 06-Feb-13 |
| 8-58   | Pharmacy | 15-2-4-8-08-58   | x | 06-Feb-13 |
| 11-58  | Pharmacy | 15-2-4-11-11-58  | x | 05-Feb-13 |
| 27-58  | PMV      | 15-2-4-27-27-58  | x | 07-Feb-13 |
| 44-58  | PMV      | 15-2-4-44-44-58  | x | 05-Feb-13 |
| 83-58  | Pharmacy | 16-3-1-83-83-58  | x | 05-Feb-13 |
| 10-67A | Pharmacy | 3-1-3-10-10-67A  | x | 06-Feb-13 |
| 11-67A | Pharmacy | 3-1-3-11-11-67A  | x | 07-Feb-13 |
| 12-67B | Pharmacy | 3-2-5-12-12-67B  | x | 11-Feb-13 |
| 1-67   | Pharmacy | 12-2-6-1-01-67   | x | 08-Feb-13 |

| HPLC - LSHTM          | CDC results           | GT MS | genname2     |
|-----------------------|-----------------------|-------|--------------|
| 107.7                 |                       | Yes   | Lumefantrine |
| 105.1                 |                       | Yes   | Lumefantrine |
| 110.5                 |                       | Yes   | Lumefantrine |
| 91.6                  |                       | Yes   | Lumefantrine |
| 107.8                 |                       | Yes   | Lumefantrine |
| 100.6                 |                       | Yes   | Lumefantrine |
| 97.2                  |                       |       | Lumefantrine |
| 97.7                  |                       | Yes   | Lumefantrine |
| 108.6                 |                       | Yes   | Lumefantrine |
| 94.6                  |                       |       | Lumefantrine |
| 94.6                  |                       | Yes   | Lumefantrine |
| 86.1                  |                       | Yes   | Lumefantrine |
| 89.5                  |                       |       | Lumefantrine |
| 91.7                  |                       |       | Lumefantrine |
| 84.5                  |                       |       | Lumefantrine |
| 94.6                  |                       | Yes   | Lumefantrine |
| 98.8                  |                       | Yes   | Lumefantrine |
| 102.0                 |                       | Yes   | Lumefantrine |
| 98.2                  |                       | Yes   | Lumefantrine |
| 107.4                 |                       | Yes   | Lumefantrine |
| 92.3                  |                       | Yes   | Lumefantrine |
| 97.2                  |                       | Yes   | Lumefantrine |
| 93.7                  |                       | Yes   | Lumefantrine |
| 99.3                  |                       | Yes   | Lumefantrine |
| 111.9                 |                       | Yes   | Lumefantrine |
| <b>Not detectable</b> | <b>Not detectable</b> |       | Lumefantrine |
| 105.5                 |                       | Yes   | Lumefantrine |
| 99.0                  |                       | Yes   | Lumefantrine |
| 91.8                  |                       | Yes   | Lumefantrine |
| 97.2                  |                       | Yes   | Lumefantrine |
| 90.0                  |                       | Yes   | Lumefantrine |
| 99.0                  |                       | Yes   | Lumefantrine |
| 97.4                  |                       | Yes   | Lumefantrine |
| 108.9                 |                       | Yes   | Lumefantrine |
| 94.7                  |                       | Yes   | Lumefantrine |
| 90.9                  |                       | Yes   | Lumefantrine |
| 96.6                  |                       |       | Lumefantrine |
| 108.2                 |                       |       | Lumefantrine |
| 102.2                 |                       |       | Lumefantrine |
| 92.0                  |                       |       | Lumefantrine |
| 100.1                 |                       |       | Lumefantrine |
| 92.9                  |                       |       | Lumefantrine |
| 101.7                 |                       |       | Lumefantrine |
| 91.1                  |                       |       | Lumefantrine |
| 89.8                  |                       | Yes   | Lumefantrine |
| 102.2                 |                       | Yes   | Lumefantrine |

|                       |     |              |
|-----------------------|-----|--------------|
| 99.0                  |     | Lumefantrine |
| 91.6                  |     | Lumefantrine |
| 91.0                  |     | Lumefantrine |
| 95.6                  | Yes | Lumefantrine |
| 91.1                  |     | Lumefantrine |
| 97.2                  | Yes | Lumefantrine |
| 91.3                  |     | Lumefantrine |
| 98.7                  |     | Lumefantrine |
| 91.1                  |     | Lumefantrine |
| 95                    |     | Lumefantrine |
| 90.0                  |     | Lumefantrine |
| 93.0                  | Yes | Lumefantrine |
| 93.3                  |     | Lumefantrine |
| 91.6                  |     | Lumefantrine |
| 94.9                  | Yes | Lumefantrine |
| 93.0                  |     | Lumefantrine |
| 94.2                  | Yes | Lumefantrine |
| 96.3                  |     | Lumefantrine |
| 97.5                  |     | Lumefantrine |
| 89.1                  |     | Lumefantrine |
| 97.6                  | Yes | Lumefantrine |
| 93.1                  | Yes | Lumefantrine |
| 85.6                  | Yes | Lumefantrine |
| 93.6                  | Yes | Lumefantrine |
| <b>Not detectable</b> |     | Lumefantrine |
| 92.3                  | Yes | Lumefantrine |
| 90.9                  |     | Lumefantrine |
| 109.7                 | Yes | Lumefantrine |
| 98.9                  | Yes | Lumefantrine |
| 87.2                  | Yes | Lumefantrine |
| 92.5                  | Yes | Lumefantrine |
| 94.9                  | Yes | Lumefantrine |
| 101.2                 | Yes | Lumefantrine |
| 92.2                  |     | Lumefantrine |
| 88                    | Yes | Lumefantrine |
| 91.6                  | Yes | Lumefantrine |
| 96.3                  | Yes | Lumefantrine |
| 97.2                  | Yes | Lumefantrine |
| 93.8                  | Yes | Lumefantrine |
| 85.3                  | Yes | Lumefantrine |
| 89.9                  | Yes | Lumefantrine |
| 91.6                  |     | Lumefantrine |
| 91.0                  |     | Lumefantrine |
| 95.6                  |     | Lumefantrine |
| 91.1                  |     | Lumefantrine |
| 97.2                  |     | Lumefantrine |
| 91.3                  | yes | Lumefantrine |
| 98.7                  |     | Lumefantrine |
| 91.1                  |     | Lumefantrine |
| <b>Degraded</b>       |     | Lumefantrine |



|                       |                       |     |              |
|-----------------------|-----------------------|-----|--------------|
| 88.6                  |                       | yes | Lumefantrine |
| 90.4                  |                       |     | Lumefantrine |
| 93.3                  |                       | yes | Lumefantrine |
| 91.6                  |                       |     | Lumefantrine |
| 94.9                  |                       |     | Lumefantrine |
| 93.0                  |                       |     | Lumefantrine |
| 94.2                  |                       |     | Lumefantrine |
| 96.3                  |                       |     | Lumefantrine |
| 97.5                  |                       |     | Lumefantrine |
| 89.1                  |                       |     | Lumefantrine |
| 91.8                  |                       | Yes | Lumefantrine |
| 87.4                  |                       |     | Lumefantrine |
| 33.7                  | 15                    |     | Lumefantrine |
| 89.9                  |                       |     | Lumefantrine |
| <b>Degraded</b>       |                       |     | Lumefantrine |
| 91.8                  |                       | Yes | Lumefantrine |
| 95.9                  |                       | Yes | Lumefantrine |
| 91.2                  |                       | Yes | Lumefantrine |
| 96.1                  |                       |     | Lumefantrine |
| 98.1                  |                       |     | Lumefantrine |
| 102.9                 |                       |     | Lumefantrine |
| 90.8                  |                       |     | Lumefantrine |
| 95.6                  |                       | Yes | Lumefantrine |
| 95.1                  |                       |     | Lumefantrine |
| 91.6                  |                       | Yes | Lumefantrine |
| 90.1                  |                       |     | Lumefantrine |
| 98.4                  |                       |     | Lumefantrine |
| 96.8                  |                       | Yes | Lumefantrine |
| 94.7                  |                       | Yes | Lumefantrine |
| 94.2                  |                       |     | Lumefantrine |
| 96.3                  |                       |     | Lumefantrine |
| 97.5                  |                       |     | Lumefantrine |
| 89.1                  |                       |     | Lumefantrine |
| 101.1                 |                       |     | Sulfadoxine  |
| <b>Not detectable</b> | <b>Not detectable</b> |     | Amodiaquine  |
| 99                    | 99.7                  |     | Amodiaquine  |
| 92                    | 88                    |     | Amodiaquine  |
| 102                   | 102.8                 |     | Amodiaquine  |
| 96.7                  | 98.4                  |     | Amodiaquine  |
| 93.0                  | no sample             |     | Amodiaquine  |
| 95.2                  | 96.6                  |     | Amodiaquine  |
| 90.7                  | 91                    |     | Amodiaquine  |
| 95.1                  | 92.3                  | Yes | Amodiaquine  |
| 98.6                  | 57.3                  | yes | Amodiaquine  |
| 91.6                  | 88                    | yes | Amodiaquine  |
| 99.8                  | 99.7                  | yes | Amodiaquine  |
| 99.5                  | 99                    | yes | Amodiaquine  |
| 96.4                  | 94.9                  | Yes | Amodiaquine  |
| 102.5                 |                       |     | Amodiaquine  |

|                       |                       |  |     |                       |
|-----------------------|-----------------------|--|-----|-----------------------|
| <b>101.1</b>          |                       |  |     | Amodiaquine           |
| 97.8                  |                       |  | Yes | Amodiaquine           |
| <b>98.2</b>           | 94.7                  |  |     | Amodiaquine           |
| <b>89.6</b>           | not detected          |  |     | Amodiaquine           |
| 102.5                 | 87.3                  |  | Yes | Amodiaquine           |
| 89.5                  |                       |  |     | Amodiaquine           |
| 99.6                  |                       |  | Yes | Amodiaquine           |
| 107.9                 | 99                    |  | Yes | Mefloquine            |
| 101.4                 | 97.7                  |  | Yes | Mefloquine            |
| 90.5 mono             | 94.7/-                |  |     |                       |
| <b>89.6</b>           | 89.2                  |  |     |                       |
| 101.1                 | 101.6                 |  | Yes | Amodiaquine           |
| 96.7                  | 22.3                  |  |     | Amodiaquine           |
| 93.0                  | 100.4                 |  |     | Amodiaquine           |
| 93                    | 96.7                  |  | Yes | Mefloquine            |
| 83.9                  | 96.5                  |  | Yes | Mefloquine            |
| 91.6                  | 96.2                  |  | Yes | Mefloquine            |
| 86.4                  | 97.1                  |  | Yes | Mefloquine            |
| 98.1                  | 98                    |  | Yes | Mefloquine            |
| 87.5                  | 97.1                  |  | Yes | Mefloquine            |
| 86.4                  | 96.4                  |  | Yes | Mefloquine            |
| <b>Not detectable</b> |                       |  |     | Mefloquine            |
| 96.1                  | 69.7                  |  |     | Sulfadoxine           |
| <b>Degraded</b>       | 53.9                  |  |     | Sulfadoxine           |
| <b>Degraded</b>       | 67.1                  |  |     | Sulfadoxine           |
| <b>96.5</b>           | 93.6                  |  |     | Sulfamethoxypyrazine  |
| <b>99.3</b>           |                       |  |     | Sulfamethoxypyrazine  |
| <b>98.6</b>           | 92.5                  |  | yes | Sulfamethoxypyrazine  |
| <b>96.3</b>           | 93.1                  |  |     | Sulfamethoxypyrazine  |
| <b>99.5</b>           | 90.4                  |  |     | Sulfamethoxypyrazine  |
| <b>89.6</b>           | 87.2                  |  | Yes | Piperaquine phosphate |
| <b>100.4</b>          |                       |  | Yes | Piperaquine phosphate |
| <b>Not detectable</b> | <b>Not detectable</b> |  |     | Piperaquine phosphate |
| <b>99.6</b>           | 71.8                  |  | Yes | Piperaquine phosphate |
| <b>97.6</b>           | 74.2                  |  | Yes | Piperaquine phosphate |
| <b>100.5</b>          | 62.8                  |  | Yes | Piperaquine phosphate |
| <b>106.5</b>          | 67.1                  |  | Yes | Piperaquine phosphate |
| <b>Not detectable</b> | <b>Not detectable</b> |  |     | Piperaquine phosphate |
| <b>91.2</b>           | 78.6                  |  | yes | Piperaquine phosphate |
| <b>97.6</b>           | 71.3                  |  | yes | Piperaquine phosphate |
| <b>96.8</b>           |                       |  | yes | Piperaquine phosphate |
| <b>91.1</b>           | 74.8                  |  | yes | Piperaquine phosphate |
| <b>94.8</b>           | 90.1                  |  | yes | Piperaquine phosphate |
| <b>93.4</b>           | 72.4                  |  | yes | Piperaquine phosphate |
| <b>96.5</b>           | 73.2                  |  | yes | Piperaquine phosphate |
| <b>89.3</b>           |                       |  | yes | Piperaquine phosphate |
| <b>99.1</b>           | 96.4                  |  | yes | Piperaquine phosphate |
| <b>94.6</b>           | 97.6                  |  | yes | Piperaquine phosphate |

|       |       |     |                       |
|-------|-------|-----|-----------------------|
| 104.8 | 98    | yes | Piperaquine phosphate |
| 95.8  | 94.2  | yes | Piperaquine phosphate |
| 80.1  | 100.1 | yes | Piperaquine phosphate |
| 95.6  | 95.3  | yes | Piperaquine phosphate |
| 96.8  | 97.4  | yes | Piperaquine phosphate |
| 89.3  | 96.8  | yes |                       |
| 79.3  | 72.5  | yes |                       |

---

| <b>genname1</b> | <b>strengthgen1</b> | <b>Weight (g)</b> | <b>Width (mm)</b> |
|-----------------|---------------------|-------------------|-------------------|
| artemether      | 20                  | 0.2929            | 9.28              |
| artemether      | 20                  | 0.2953            | 9.22              |
| artemether      | 20                  | 0.2929            | 9.24              |
| artemether      | 20                  | 0.2446            | 9.15              |
| artemether      | 20                  | 0.2468            | 9.10              |
| artemether      | 20                  | 0.2474            | 9.10              |
| artemether      | 20                  | 0.2473            | 9.18              |
| artemether      | 20                  | 0.2484            | 9.17              |
| artemether      | 20                  | 0.2445            | 9.18              |
| artemether      | 20                  | 0.2517            | 9.17              |
| artemether      | 20                  | 0.2488            | 9.15              |
| artemether      | 20                  | 0.2489            | 9.15              |
| artemether      | 20                  | 0.2443            | 9.08              |
| artemether      | 20                  | 0.2475            | 9.17              |
| artemether      | 20                  | 0.2513            | 9.18              |
| artemether      | 20                  | 0.2487            | 9.16              |
| artemether      | 20                  | 0.2466            | 9.16              |
| artemether      | 20                  | 0.2458            | 9.11              |
| artemether      | 20                  | 0.2469            | 9.13              |
| artemether      | 20                  | 0.2492            | 9.20              |
| artemether      | 20                  | 0.2510            | 9.15              |
| artemether      | 20                  | 0.2490            | 9.10              |
| artemether      | 20                  | 0.2517            | 9.14              |
| artemether      | 20                  | 0.2493            | 9.10              |
| artemether      | 20                  | 0.2485            | 9.16              |
| artemether      | 20                  | 0.2506            | 9.19              |
| artemether      | 20                  | 0.2501            | 9.12              |
| artemether      | 20                  | 0.2485            | 9.18              |
| artemether      | 20                  | 0.2496            | 9.08              |
| artemether      | 20                  | 0.2482            | 9.13              |
| artemether      | 20                  | 0.2532            | 9.17              |
| artemether      | 20                  | 0.2457            | 9.09              |
| artemether      | 20                  | 0.2472            | 9.09              |
| artemether      | 20                  | 0.2478            | 9.06              |
| artemether      | 20                  | 0.2492            | 9.09              |
| artemether      | 20                  | 0.2499            | 9.06              |
| artemether      | 20                  | 0.2521            | 9.08              |
| artemether      | 20                  | 0.2464            | 9.09              |
| artemether      | 20                  | 0.2463            | 9.15              |

|            |    |    |        |      |
|------------|----|----|--------|------|
| artemether | 20 |    | 0.2473 | 9.04 |
| artemether | 20 |    | 0.2474 | 9.04 |
| artemether | 20 |    | 0.2485 | 9.06 |
| artemether | 20 |    | 0.2498 | 9.17 |
| artemether | 20 |    | 0.2513 | 9.18 |
| artemether | 20 |    | 0.2466 | 9.13 |
| artemether | 20 |    | 0.2478 | 9.17 |
| artemether | 20 |    | 0.2461 | 9.15 |
| artemether | 20 |    | 0.2522 | 9.16 |
| artemether | 20 |    | 0.2468 | 9.15 |
| artemether | 20 |    | 0.2498 | 9.14 |
| artemether | 20 |    | 0.2531 | 9.12 |
| artemether | 20 |    | 0.2506 | 9.08 |
| artemether | 20 |    | 0.2472 | 9.05 |
| artemether | 20 |    | 0.2501 | 9.21 |
| artemether | 20 |    | 0.2473 | 9.04 |
| artemether | 20 |    | 0.2459 | 9.04 |
| artemether | 20 |    | 0.2531 | 9.06 |
| artemether | 20 |    | 0.2493 | 9.17 |
| artemether | 20 |    | 0.2520 | 9.13 |
| artemether | 20 |    | 0.2519 | 9.05 |
| artemether | 20 |    | 0.2499 | 9.14 |
| artemether | 20 |    | 0.2493 | 9.04 |
| artemether |    | 20 | 0.2534 | 9.10 |
| artemether | 20 |    | 0.2472 | 9.10 |
| artemether | 20 |    | 0.2468 | 9.10 |
| artemether | 20 |    | 0.2504 | 9.14 |
| artemether | 20 |    | 0.2452 | 9.09 |
| artemether | 20 |    | 0.2518 | 9.09 |
| artemether | 20 |    | 0.2503 | 9.13 |
| artemether | 20 |    | 0.2444 | 9.13 |
| artemether | 20 |    | 0.2500 | 9.09 |
| artemether | 20 |    | 0.2467 | 9.15 |
| artemether | 20 |    | 0.2510 | 9.11 |
| artemether | 20 |    | 0.2490 | 9.14 |
| artemether | 20 |    | 0.2533 | 9.16 |
| artemether | 20 |    | 0.2479 | 9.13 |
| artemether | 20 |    | 0.2484 | 9.15 |
| artemether | 20 |    | 0.2510 | 9.20 |
| artemether | 20 |    | 0.2498 | 9.14 |
| artemether | 20 |    | 0.2457 | 9.11 |
| artemether | 20 |    | 0.2465 | 9.17 |
| artemether | 20 |    | 0.2486 | 9.12 |
| artemether | 20 |    | 0.2460 | 9.13 |
| artemether | 20 |    | 0.2488 | 9.13 |
| artemether | 20 |    | 0.2483 | 9.12 |
| artemether | 20 |    | 0.2486 | 9.15 |
| artemether | 20 |    | 0.2510 | 9.10 |
| artemether | 20 |    | 0.2474 | 9.18 |
| artemether | 20 |    | 0.2499 | 9.16 |

|            |    |        |      |
|------------|----|--------|------|
| artemether | 20 | 0.2473 | 9.10 |
| artemether | 20 | 0.2486 | 9.10 |
| artemether | 20 | 0.2449 | 9.11 |
| artemether | 20 | 0.2474 | 9.15 |
| artemether | 20 | 0.2497 | 9.15 |
| artemether | 20 | 0.2505 | 9.15 |
| artemether | 20 | 0.2483 | 9.12 |
| artemether | 20 | 0.2494 | 9.13 |
| artemether | 20 | 0.2461 | 9.12 |
| artemether | 20 | 0.2474 | 9.16 |
| artemether | 20 | 0.2471 | 9.14 |
| artemether | 20 | 0.2475 | 9.13 |
| artemether | 20 | 0.2455 | 9.11 |
| artemether | 20 | 0.2483 | 9.15 |
| artemether | 20 | 0.2528 | 9.19 |
| artemether | 20 | 0.2542 | 9.11 |
| artemether | 20 | 0.2509 | 9.18 |
| artemether | 20 | 0.2438 | 9.08 |
| artemether | 20 | 0.2464 | 9.09 |
| artemether | 20 | 0.2516 | 9.08 |
| artemether | 20 | 0.2447 | 9.12 |
| artemether | 20 | 0.2475 | 9.15 |
| artemether | 20 | 0.2466 | 9.16 |
| artemether | 20 | 0.2447 | 9.06 |
| artemether | 20 | 0.2451 | 9.13 |
| artemether | 20 | 0.2432 | 9.06 |
| artemether | 20 | 0.2489 | 9.18 |
| artemether | 20 | 0.2496 | 9.17 |
| artemether | 20 | 0.2442 | 9.10 |
| artemether | 20 | 0.2481 | 9.06 |
| artemether | 20 | 0.2511 | 9.13 |
| artemether | 20 | 0.2492 | 9.10 |
| artemether | 20 | 0.2533 | 9.17 |
| artemether | 20 | 0.2528 | 9.16 |
| artemether | 20 | 0.2457 | 9.09 |
| artemether | 20 | 0.2485 | 9.10 |
| artemether | 20 | 0.2440 | 9.12 |
| artemether | 20 | 0.2476 | 9.15 |
| artemether | 20 | 0.2453 | 9.14 |
| artemether | 20 | 0.2500 | 9.12 |
| artemether | 20 | 0.2507 | 9.11 |
| artemether | 20 | 0.2470 | 9.13 |
| artemether | 20 | 0.2469 | 9.16 |
| artemether | 20 | 0.2451 | 9.08 |
| artemether | 20 | 0.2484 | 9.15 |
| artemether | 20 | 0.2448 | 9.10 |
| artemether | 20 | 0.2448 | 9.07 |
| artemether | 20 | 0.2491 | 9.08 |
| artemether | 20 | 0.2483 | 9.12 |
| artemether | 20 | 0.2450 | 9.12 |

|            |    |    |        |      |
|------------|----|----|--------|------|
| artemether | 20 |    | 0.2470 | 9.14 |
| artemether | 20 |    | 0.2485 | 9.18 |
| artemether | 20 |    | 0.2492 | 9.12 |
| artemether | 20 |    | 0.2486 | 9.12 |
| artemether | 20 |    | 0.2469 | 9.05 |
| artemether | 20 |    | 0.2496 | 9.10 |
| artemether | 20 |    | 0.2482 | 9.07 |
| artemether | 20 |    | 0.2462 | 9.15 |
| artemether | 20 |    | 0.2531 | 9.10 |
| artemether | 20 |    | 0.2489 | 9.15 |
| artemether | 20 |    | 0.2476 | 9.06 |
| artemether | 20 |    | 0.2461 | 9.04 |
| artemether | 20 |    | 0.2444 | 9.06 |
| artemether | 20 |    | 0.2485 | 9.15 |
| artemether | 20 |    | 0.2477 | 9.16 |
| artemether | 20 |    | 0.2460 | 9.05 |
| artemether | 20 |    | 0.2468 | 9.07 |
| artemether | 20 |    | 0.2467 | 9.11 |
| artemether | 20 |    | 0.3303 | 9.65 |
| artemether | 20 |    | 0.3272 | 9.65 |
| artemether | 20 |    | 0.3326 | 9.63 |
| artemether | 20 |    | 0.3201 | 9.58 |
| artemether | 20 |    | 0.3343 | 9.64 |
| artemether | 20 |    | 0.3226 | 9.67 |
| artemether | 20 |    | 0.3341 | 9.61 |
| artemether | 20 |    | 0.3313 | 9.65 |
| artemether | 20 |    | 0.3282 | 9.64 |
| artemether | 20 |    | 0.3308 | 9.66 |
| artemether | 20 |    | 0.3336 | 9.71 |
| artemether | 20 |    | 0.3292 | 9.62 |
| artemether | 20 |    | 0.3333 | 9.64 |
| artemether | 20 |    | 0.3263 | 9.68 |
| artemether |    | 20 | 0.3337 | 9.65 |
| artemether | 20 |    | 0.3000 | 9.25 |
| artemether | 20 |    | 0.2802 | 9.22 |
| artemether | 20 |    | 0.2816 | 9.29 |
| artemether | 80 |    | 0.2913 | 9.25 |
| artemether | 20 |    | 0.3056 | 9.25 |
| artemether | 20 |    | 0.2957 | 9.35 |
| artemether | 20 |    | 0.2966 | 9.27 |
| artemether | 20 |    | 0.2968 | 9.23 |
| artemether | 20 |    | 0.2997 | 9.28 |
| artemether | 20 |    | 0.2877 | 9.28 |
| artemether | 20 |    | 0.2753 | 9.27 |
| artemether | 20 |    | 0.2382 | 9.21 |
| artemether | 20 |    | 0.3495 | 9.99 |
| artemether | 20 |    | 0.3527 | 9.93 |
| artemether | 20 |    | 0.3571 | 9.86 |
| artemether | 20 |    | 0.3483 | 9.88 |
| artemether | 20 |    | 0.3564 | 9.89 |

|            |    |        |       |
|------------|----|--------|-------|
| artemether | 20 | 0.3564 | 9.88  |
| artemether | 20 | 0.3509 | 9.87  |
| artemether | 20 | 0.3543 | 9.93  |
| artemether | 20 | 0.3532 | 9.88  |
| artemether | 20 | 0.3588 | 9.96  |
| artemether | 20 | 0.3571 | 9.99  |
| artemether | 20 | 0.3626 | 9.98  |
| artemether | 20 | 0.3492 | 10.81 |
| artemether | 20 | 0.2426 | 9.08  |
| artemether | 20 | 0.2404 | 9.06  |
| artemether | 20 | 0.2418 | 9.08  |
| artemether | 20 | 0.2374 | 9.07  |
| artemether | 20 | 0.2333 | 9.15  |
| artemether | 20 | 0.2435 | 9.07  |
| artemether | 20 | 0.2394 | 9.11  |
| artemether | 20 | 0.3401 | 9.12  |
| artemether | 20 | 0.2348 | 9.10  |
| artemether | 20 | 0.2390 | 9.04  |
| artemether | 20 | 0.2528 | 9.08  |
| artemether | 20 | 0.2598 | 9.37  |
| artemether | 20 | 0.2616 | 9.23  |
| artemether | 20 | 0.2639 | 9.23  |
| artemether | 20 | 0.2631 | 9.25  |
| artemether | 20 | 0.2645 | 9.25  |
| artemether | 20 | 0.2421 | 9.05  |
| artemether | 20 | 0.2424 | 9.04  |
| artemether | 20 | 0.2376 | 9.05  |
| artemether | 20 | 0.2436 | 9.03  |
| artemether | 20 | 0.2413 | 9.05  |
| artemether | 20 | 0.2423 | 9.11  |
| artemether | 20 | 0.2437 | 9.05  |
| artemether | 20 | 0.2436 | 9.05  |
| artemether | 20 | 0.2407 | 9.04  |
| artemether | 20 | 0.2412 | 9.05  |
| artemether | 20 | 0.2404 | 9.03  |
| artemether | 20 | 0.2411 | 9.03  |
| artemether | 20 | 0.2402 | 9.04  |
| artemether | 20 | 0.2453 | 9.08  |
| artemether | 20 | 0.2433 | 9.03  |
| artemether | 20 | 0.2412 | 9.05  |
| artemether | 20 | 0.2439 | 9.05  |
| artemether | 20 | 0.2401 | 9.04  |
| artemether | 20 | 0.2414 | 9.04  |
| artemether | 20 | 0.2425 | 9.05  |
| artemether | 20 | 0.2418 | 9.04  |
| artemether | 20 | 0.2423 | 9.09  |
| artemether | 20 | 0.2409 | 9.06  |
| artemether | 20 | 0.2421 | 9.05  |
| artemether | 20 | 0.2412 | 9.05  |
| artemether | 20 | 0.2396 | 9.05  |

|            |    |        |      |
|------------|----|--------|------|
| artemether | 20 | 0.2406 | 9.06 |
| artemether | 20 | 0.2429 | 9.05 |
| artemether | 20 | 0.2432 | 9.06 |
| artemether | 20 | 0.2429 | 9.06 |
| artemether | 20 | 0.2424 | 9.05 |
| artemether | 20 | 0.2405 | 9.04 |
| artemether | 20 | 0.2433 | 9.05 |
| artemether | 20 | 0.2393 | 9.06 |
| artemether | 20 | 0.2405 | 9.08 |
| artemether | 20 | 0.2435 | 9.07 |
| artemether | 20 | 0.2428 | 9.06 |
| artemether | 20 | 0.2410 | 9.03 |
| artemether | 20 | 0.2410 | 9.06 |
| artemether | 20 | 0.2401 | 9.05 |
| artemether | 20 | 0.3466 | 9.04 |
| artemether | 20 | 0.2435 | 9.02 |
| artemether | 20 | 0.2401 | 9.10 |
| artemether | 20 | 0.2427 | 9.02 |
| artemether | 20 | 0.2369 | 8.99 |
| artemether | 20 | 0.2432 | 8.99 |
| artemether | 20 | 0.2402 | 9.01 |
| artemether | 20 | 0.2383 | 8.98 |
| artemether | 20 | 0.2418 | 9.01 |
| artemether | 20 | 0.2447 | 9.01 |
| artemether | 20 | 0.2399 | 9.01 |
| artemether | 20 | 0.2389 | 8.99 |
| artemether | 20 | 0.2401 | 9.06 |
| artemether | 20 | 0.2432 | 9.08 |
| artemether | 20 | 0.2434 | 9.08 |
| artemether | 20 | 0.2398 | 9.11 |
| artemether | 20 | 0.2381 | 9.12 |
| artemether | 20 | 0.2396 | 9.10 |
| artemether | 20 | 0.2397 | 9.08 |
| artemether | 20 | 0.2397 | 9.10 |
| artemether | 20 | 0.2399 | 9.11 |
| artemether | 20 | 0.2394 | 9.11 |
| artemether | 20 | 0.2436 | 9.08 |
| artemether | 20 | 0.2381 | 9.06 |
| artemether | 20 | 0.2403 | 9.07 |
| artemether | 20 | 0.2438 | 9.04 |
| artemether | 20 | 0.2400 | 9.08 |
| artemether | 20 | 0.2406 | 9.12 |
| artemether | 20 | 0.2385 | 9.06 |
| artemether | 20 | 0.2391 | 9.11 |
| artemether | 20 | 0.2417 | 9.08 |
| artemether | 20 | 0.2400 | 9.06 |
| artemether | 20 | 0.2469 | 9.07 |
| artemether | 20 | 0.3240 | 9.47 |
| artemether | 20 | 0.2446 | 9.10 |
| artemether | 20 | 0.2395 | 9.07 |



|            |    |        |      |
|------------|----|--------|------|
| artemether | 20 | 0.2457 | 9.13 |
| artemether | 20 | 0.2420 | 9.09 |
| artemether | 20 | 0.2442 | 9.06 |
| artemether | 20 | 0.2438 | 9.06 |
| artemether | 20 | 0.2368 | 9.06 |
| artemether | 20 | 0.2412 | 9.12 |
| artemether | 20 | 0.2450 | 9.10 |
| artemether | 20 | 0.2480 | 9.08 |
| artemether | 20 | 0.2420 | 9.08 |
| artemether | 20 | 0.2394 | 9.09 |
| artemether | 20 | 0.2381 | 9.10 |
| artemether | 20 | 0.2406 | 9.04 |
| artemether | 20 | 0.2438 | 9.05 |
| artemether | 20 | 0.2410 | 9.04 |
| artemether | 20 | 0.2421 | 9.08 |
| artemether | 20 | 0.2435 | 9.07 |
| artemether | 20 | 0.2410 | 9.05 |
| artemether | 20 | 0.2449 | 9.06 |
| artemether | 20 | 0.2440 | 9.10 |
| artemether | 20 | 0.2387 | 9.06 |
| artemether | 20 | 0.2410 | 9.03 |
| artemether | 20 | 0.2425 | 9.04 |
| artemether | 20 | 0.2435 | 9.08 |
| artemether | 20 | 0.2428 | 9.03 |
| artemether | 20 | 0.2430 | 9.03 |
| artemether | 20 | 0.2419 | 9.09 |
| artemether | 20 | 0.2444 | 9.07 |
| artemether | 20 | 0.2417 | 9.08 |
| artemether | 20 | 0.2402 | 9.10 |
| artemether | 20 | 0.2454 | 9.04 |
| artemether | 20 | 0.2419 | 9.06 |
| artemether | 20 | 0.3099 | 9.50 |
| artemether | 20 | 0.2465 | 9.05 |
| artemether | 20 | 0.2333 | 9.07 |
| artemether | 20 | 0.2465 | 9.05 |
| artemether | 20 | 0.2433 | 9.07 |
| artemether | 20 | 0.2448 | 9.05 |
| artemether | 20 | 0.2410 | 9.08 |
| artemether | 20 | 0.2453 | 9.05 |
| artemether | 20 | 0.2447 | 9.11 |
| artemether | 20 | 0.2399 | 9.04 |
| artemether | 20 | 0.2863 | 9.15 |
| artemether | 20 | 0.2884 | 9.14 |
| artemether | 20 | 0.2923 | 9.13 |
| artemether | 20 | 0.2871 | 9.16 |
| artemether | 20 | 0.2864 | 9.18 |
| artemether | 20 | 0.2861 | 9.16 |
| artemether | 20 | 0.2885 | 9.14 |
| artemether | 20 | 0.2873 | 9.10 |
| artemether | 20 | 0.2887 | 9.18 |

|            |    |        |      |
|------------|----|--------|------|
| artemether | 20 | 0.2860 | 9.16 |
| artemether | 20 | 0.2850 | 9.11 |
| artemether | 20 | 0.2870 | 9.16 |
| artemether | 20 | 0.2856 | 9.14 |
| artemether | 20 | 0.2891 | 9.15 |
| artemether | 20 | 0.2855 | 9.14 |
| artemether | 20 | 0.2572 | 9.16 |
| artemether | 20 | 0.2856 | 9.13 |
| artemether | 20 | 0.2862 | 9.13 |
| artemether | 20 | 0.2862 | 9.15 |
| artemether | 20 | 0.2865 | 9.16 |
| artemether | 20 | 0.2846 | 9.12 |
| artemether | 20 | 0.2884 | 9.19 |
| artemether | 20 | 0.2880 | 9.13 |
| artemether | 20 | 0.2897 | 9.17 |
| artemether | 20 | 0.2854 | 9.15 |
| artemether | 20 | 0.2855 | 9.19 |
| artemether | 20 | 0.2882 | 9.14 |
| artemether | 20 | 0.2857 | 9.14 |
| artemether | 20 | 0.2863 | 9.16 |
| artemether | 20 | 0.2874 | 9.16 |
| artemether | 20 | 0.2896 | 9.15 |
| artemether | 20 | 0.2859 | 9.11 |
| artemether | 20 | 0.2939 | 9.17 |
| artemether | 20 | 0.2855 | 9.14 |
| artemether | 20 | 0.2893 | 9.13 |
| artemether | 20 | 0.2890 | 9.13 |
| artemether | 20 | 0.2880 | 9.12 |
| artemether | 20 | 0.2860 | 9.13 |
| artemether | 20 | 0.2902 | 9.14 |
| artemether | 20 | 0.2856 | 9.13 |
| artemether | 20 | 0.2882 | 9.11 |
| artemether | 20 | 0.2894 | 9.15 |
| artemether | 20 | 0.2880 | 9.13 |
| artemether | 20 | 0.2886 | 9.18 |
| artemether | 20 | 0.2824 | 9.19 |
| artemether | 20 | 0.2832 | 9.10 |
| artemether | 20 | 0.2860 | 9.09 |
| artemether | 20 | 0.2865 | 9.07 |
| artemether | 20 | 0.2831 | 9.10 |
| artemether | 20 | 0.2892 | 9.11 |
| artemether | 20 | 0.2875 | 9.07 |
| artemether | 20 | 0.2881 | 9.16 |
| artemether | 20 | 0.2894 | 9.14 |
| artemether | 20 | 0.2859 | 9.11 |
| artemether | 20 | 0.2845 | 9.10 |
| artemether | 20 | 0.2880 | 9.12 |
| artemether | 20 | 0.2886 | 9.12 |
| artemether | 20 | 0.2886 | 9.12 |
| artemether | 20 | 0.2881 | 9.13 |

|            |    |        |       |
|------------|----|--------|-------|
| artemether | 20 | 0.2899 | 9.13  |
| artemether | 20 | 0.2888 | 9.15  |
| artemether | 20 | 0.2864 | 9.07  |
| artemether | 20 | 0.2864 | 9.09  |
| artemether | 20 | 0.2854 | 9.00  |
| artemether | 20 | 0.2865 | 9.10  |
| artemether | 20 | 0.2918 | 9.05  |
| artemether | 20 | 0.2887 | 9.11  |
| artemether | 20 | 0.2875 | 9.09  |
| artemether | 20 | 0.2956 | 9.31  |
| artemether | 20 | 0.3066 | 9.26  |
| artemether | 20 | 0.2942 | 9.28  |
| artemether | 20 | 0.2488 | 9.27  |
| artemether | 20 | 0.2447 | 9.16  |
| artemether | 20 | 0.2471 | 9.15  |
| artemether | 20 | 0.2466 | 9.16  |
| artemether | 20 | 0.2453 | 9.18  |
| artemether | 20 | 0.2501 | 9.12  |
| artemether | 20 | 0.2477 | 9.16  |
| artemether | 20 | 0.2517 | 9.17  |
| artemether | 20 | 0.2448 | 9.20  |
| artemether | 20 | 0.2472 | 9.24  |
| artemether | 20 | 0.2452 | 9.22  |
| artemether | 20 | 0.2451 | 9.14  |
| artemether | 20 | 0.2450 | 9.14  |
| artemether | 20 | 0.2413 | 9.09  |
| artemether | 20 | 0.2508 | 9.13  |
| artemether | 20 | 0.2406 | 9.11  |
| artemether | 20 | 0.2466 | 9.09  |
| artemether | 20 | 0.2402 | 9.11  |
| artemether | 20 | 0.2408 | 9.08  |
| artemether | 20 | 0.2441 | 9.16  |
| artemether | 20 | 0.2397 | 9.11  |
| artemether | 20 | 0.2348 | 9.12  |
| artemether | 20 | 0.2461 | 9.14  |
| artemether | 20 | 0.2358 | 9.12  |
| artemether | 20 | 0.2413 | 9.10  |
| artemether | 20 | 0.2477 | 9.08  |
| artemether | 20 | 0.2436 | 9.10  |
| artemether | 20 | 0.2973 | 9.21  |
| artemether | 20 | 0.3057 | 9.23  |
| artemether | 20 | 0.3443 | 10.62 |
| artemether | 20 | 0.3189 | 9.33  |
| artemether | 20 | 0.3069 | 9.64  |
| artemether | 20 | 0.2965 | 10.37 |
| artemether | 20 | 0.3490 | 10.07 |
| artemether | 20 | 0.3517 | 10.03 |
| artemether | 20 | 0.3514 | 10.04 |
| artemether | 20 | 0.3541 | 10.10 |
| artemether | 20 | 0.3547 | 10.11 |

|            |    |        |        |       |
|------------|----|--------|--------|-------|
| artemether | 20 | 0.3452 | 10.05  |       |
| artemether | 20 | 0.3567 | 10.15  |       |
| artemether | 20 | 0.3540 | 10.04  |       |
| artemether | 20 | 0.3540 | 10.18  |       |
| artemether | 20 | 0.3578 | 10.10  |       |
| artemether | 20 | 0.3513 | 10.09  |       |
| artemether | 20 | 0.3536 | 10.11  |       |
| artemether | 20 | 0.3545 | 10.15  |       |
| artemether | 20 | 0.3524 | 10.05  |       |
| artemether | 20 | 0.3567 | 10.06  |       |
| artemether | 20 | 0.3584 | 10.11  |       |
| artemether | 20 | 0.3652 | 10.05  |       |
| artemether | 20 | 0.3514 | 10.10  |       |
| artemether | 20 | 0.3518 | 10.02  |       |
| artemether | 20 | 0.3574 | 10.06  |       |
| artemether | 20 | 0.3497 | 10.06  |       |
| artemether | 20 | 0.3550 | 10.06  |       |
| artemether | 20 | 0.3509 | 10.05  |       |
| artemether | 20 | 0.3511 | 10.11  |       |
| artemether | 20 | 0.3544 | 10.18  |       |
| artemether | 20 | 0.3548 | 10.07  |       |
| artemether | 20 | 0.3546 | 10.05  |       |
| artemether | 20 | 0.3541 | 10.13  |       |
| artemether | 20 | 0.3524 | 10.11  |       |
| artemether | 20 | 0.3595 | 10.08  |       |
| artemether | 20 | 0.3482 | 10.10  |       |
| artemether | 20 | 0.3571 | 10.11  |       |
| artesunate | 50 |        |        |       |
| artemether | 20 | 0.3544 | 10.06  |       |
| artemether | 20 | 0.3518 | 10.08  |       |
| artemether | 20 | 0.3514 | 10.05  |       |
| artemether | 20 | 0.3472 | 10.07  |       |
| artemether |    | 20     | 0.3559 | 10.16 |
| artemether | 20 | 0.3570 | 10.10  |       |
| artemether | 20 | 0.3548 | 10.06  |       |
| artemether | 20 | 0.3511 | 10.03  |       |
| artemether | 20 | 0.3515 | 10.04  |       |
| artemether | 20 | 0.3557 | 10.18  |       |
| artemether | 20 | 0.3532 | 10.13  |       |
| artemether | 20 | 0.3524 | 10.16  |       |
| artemether | 20 | 0.3514 | 10.04  |       |
| artemether | 20 | 0.3497 | 10.10  |       |
| artemether | 20 | 0.3577 | 10.15  |       |
| artemether | 20 | 0.3400 | 10.11  |       |
| artemether | 20 | 0.3547 | 10.11  |       |
| artemether | 20 | 0.3552 | 10.08  |       |
| artemether | 20 | 0.3450 | 10.06  |       |
| artemether | 20 | 0.3393 | 10.03  |       |
| artemether | 20 | 0.3524 | 10.10  |       |
| artemether | 20 | 0.3529 | 10.10  |       |

|            |    |        |       |
|------------|----|--------|-------|
| artemether | 20 | 0.3525 | 10.06 |
| artemether | 20 | 0.3540 | 10.03 |
| artemether | 20 | 0.3427 | 10.07 |
| artemether | 20 | 0.3555 | 10.12 |
| artemether | 20 | 0.3527 | 10.03 |
| artemether | 20 | 0.3499 | 10.03 |
| artemether | 20 | 0.3570 | 10.04 |
| artemether | 20 | 0.3466 | 10.04 |
| artemether | 20 | 0.3563 | 10.10 |
| artemether | 20 | 0.3530 | 10.08 |
| artemether | 20 | 0.3490 | 10.13 |
| artemether | 20 | 0.3541 | 10.05 |
| artemether | 20 | 0.3528 | 10.03 |
| artemether | 20 | 0.3462 | 10.09 |
| artemether | 20 | 0.3483 | 10.07 |
| artemether | 20 | 0.3524 | 10.10 |
| artemether | 20 | 0.3482 | 10.07 |
| artemether | 20 | 0.3497 | 10.07 |
| artemether | 20 | 0.3509 | 10.01 |
| artemether | 20 | 0.3479 | 10.05 |
| artemether | 20 | 0.3495 | 10.06 |
| artemether | 20 | 0.3554 | 10.02 |
| artemether | 20 | 0.3541 | 10.05 |
| artemether | 20 | 0.3500 | 10.06 |
| artemether | 20 | 0.3554 | 10.12 |
| artemether | 20 | 0.3499 | 10.06 |
| artemether | 20 | 0.3530 | 10.09 |
| artemether | 20 | 0.3498 | 10.04 |
| artemether | 20 | 0.3478 | 10.05 |
| artemether | 20 | 0.3522 | 10.07 |
| artemether | 20 | 0.3522 | 10.05 |
| artemether | 20 | 0.3585 | 10.01 |
| artemether | 20 | 0.3418 | 10.11 |
| artemether | 20 | 0.3539 | 10.04 |
| artemether | 20 | 0.3552 | 10.08 |
| artemether | 20 | 0.3567 | 10.07 |
| artemether | 20 | 0.3517 | 10.07 |
| artemether | 20 | 0.3502 | 10.07 |
| artemether | 20 | 0.3494 | 10.04 |
| artemether | 20 | 0.3515 | 10.02 |
| artemether | 20 | 0.3530 | 10.10 |
| artemether | 20 | 0.3502 | 10.16 |
| artemether | 20 | 0.3577 | 10.07 |
| artemether | 20 | 0.3551 | 10.04 |
| artemether | 20 | 0.3519 | 10.08 |
| artemether | 20 | 0.3457 | 10.08 |
| artemether | 20 | 0.3464 | 10.08 |
| artemether | 20 | 0.3534 | 10.09 |
| artemether | 20 | 0.3539 | 10.09 |
| artemether | 20 | 0.3537 | 10.07 |

|            |    |        |       |
|------------|----|--------|-------|
| artemether | 20 | 0.3485 | 10.07 |
| artemether | 20 | 0.3486 | 10.07 |
| artemether | 20 | 0.3501 | 10.07 |
| artemether | 20 | 0.3529 | 10.07 |
| artemether | 20 | 0.3501 | 10.08 |
| artemether | 20 | 0.3461 | 10.09 |
| artemether | 20 | 0.3546 | 10.09 |
| artemether | 20 | 0.3446 | 10.05 |
| artemether | 20 | 0.3406 | 10.12 |
| artemether | 20 | 0.3510 | 10.02 |
| artemether | 20 | 0.3463 | 10.02 |
| artemether | 20 | 0.3547 | 10.06 |
| artemether | 20 | 0.3582 | 10.00 |
| artemether | 20 | 0.3528 | 10.05 |
| artemether | 20 | 0.3488 | 10.09 |
| artemether | 20 | 0.3503 | 10.06 |
| artemether | 20 | 0.3550 | 10.06 |
| artemether | 20 | 0.3536 | 10.05 |
| artemether | 20 | 0.3407 | 10.07 |
| artemether | 20 | 0.2738 | 9.26  |
| artemether | 20 | 0.2668 | 9.23  |
| artemether | 20 | 0.2717 | 9.20  |
| artemether | 20 | 0.2111 | 8.07  |
| artemether | 20 | 0.2038 | 8.08  |
| artemether | 20 | 0.2109 | 8.06  |
| artemether | 20 | 0.2099 | 8.06  |
| artemether | 20 | 0.2652 | 9.13  |
| artemether | 20 | 0.2616 | 9.12  |
| artemether | 20 | 0.2694 | 9.11  |
| artemether | 20 | 0.2546 | 9.10  |
| artemether | 20 | 0.2607 | 9.14  |
| artemether | 20 | 0.2744 | 9.14  |
| artemether | 20 | 0.2716 | 9.13  |
| artemether | 20 | 0.2636 | 9.10  |
| artemether | 20 | 0.2763 | 9.10  |
| artemether | 20 | 0.2581 | 9.08  |
| artemether | 20 | 0.2677 | 9.13  |
| artemether | 20 | 0.2716 | 9.10  |
| artemether | 20 | 0.2790 | 9.13  |
| artemether | 20 | 0.2638 | 9.15  |
| artemether | 20 | 0.2701 | 9.20  |
| artemether | 20 | 0.2664 | 9.13  |
| artemether | 20 | 0.2663 | 9.08  |
| artemether | 20 | 0.2872 | 9.15  |
| artemether | 40 | 0.3686 | 10.23 |
| artemether | 40 | 0.4030 | 10.16 |
| artemether | 40 | 0.3891 | 10.08 |
| artemether | 40 | 0.3785 | 10.12 |
| artemether | 40 | 0.3883 | 10.11 |
| artemether | 40 | 0.3572 | 10.15 |

|            |    |    |        |       |
|------------|----|----|--------|-------|
| artemether |    | 40 | 0.4611 | 11.02 |
| artemether | 40 |    | 0.4496 | 11.03 |
| artemether |    | 40 | 0.4549 | 11.01 |
| artemether | 40 |    | 0.4452 | 11.03 |
| artemether |    | 40 | 0.4587 | 10.98 |
| artemether |    | 40 | 0.4601 | 11.03 |
| artemether | 40 |    | 0.4560 | 11.02 |
| artemether | 40 |    | 0.4639 | 11.02 |
| artemether | 40 |    | 0.4193 | 11.03 |
| artemether | 40 |    | 0.4670 | 11.04 |
| artemether | 40 |    | 0.4460 | 11.01 |
| artemether |    | 40 | 0.4516 | 11.02 |
| artemether |    | 40 | 0.4674 | 11.03 |
| artemether |    | 40 | 0.4577 | 11.01 |
| artemether | 40 |    | 0.4535 | 11.05 |
| artemether |    | 40 | 0.3782 | 11.02 |
| artemether | 40 |    | 0.5583 | 12.62 |
| artemether | 40 |    | 0.5625 | 12.66 |
| artemether | 40 |    | 0.5800 | 13.13 |
| artemether | 40 |    | 0.6076 | 13.09 |
| artemether | 40 |    | 0.6358 | 13.07 |
| artemether | 40 |    | 0.6167 | 13.12 |
| artemether | 40 |    | 0.5407 | 13.09 |
| artemether | 40 |    | 0.4911 | 13.16 |
| artemether | 40 |    | 0.3985 | 11.08 |
| artemether | 40 |    | 0.4502 | 10.13 |
| artemether | 40 |    | 0.3694 | 10.05 |
| artemether | 80 |    | 0.7310 | 12.54 |
| artemether | 80 |    | 0.7441 | 12.51 |
| artemether | 80 |    | 0.7338 | 12.50 |
| artemether | 80 |    | 0.7151 | 12.48 |
| artemether | 80 |    | 0.7467 | 12.50 |
| artemether | 80 |    | 0.7282 | 12.49 |
| artemether | 80 |    | 0.7353 | 12.51 |
| artemether | 80 |    | 0.7292 | 12.47 |
| artemether | 80 |    | 0.7275 | 12.49 |
| artemether | 80 |    | 0.7352 | 12.52 |
| artemether | 80 |    | 0.7228 | 12.44 |
| artemether | 80 |    | 0.7369 | 12.55 |
| artemether | 80 |    | 0.7382 | 12.53 |
| artemether | 80 |    | 0.7384 | 12.51 |
| artemether | 80 |    | 0.7417 | 12.49 |
| artemether | 80 |    | 0.7271 | 12.52 |
| artemether | 80 |    | 0.7521 | 12.48 |
| artemether | 80 |    | 0.7295 | 12.50 |
| artemether | 80 |    | 0.7411 | 12.46 |
| artemether | 80 |    | 0.7277 | 12.51 |
| artemether | 80 |    | 0.7190 | 12.53 |
| artemether | 80 |    | 0.7311 | 12.51 |
| artemether | 80 |    | 0.7369 | 12.50 |

|            |    |    |        |       |
|------------|----|----|--------|-------|
| artemether | 80 |    | 0.7643 | 12.97 |
| artemether | 80 |    | 0.7632 | 12.80 |
| artemether | 80 |    | 0.7869 | 12.89 |
| artemether | 80 |    | 0.7754 | 12.90 |
| artemether | 80 |    | 0.7356 | 12.87 |
| artemether | 80 |    | 0.7718 | 12.89 |
| artemether | 80 |    | 0.7764 | 12.92 |
| artemether | 80 |    | 0.7493 | 12.86 |
| artemether | 80 |    | 0.7989 | 12.97 |
| artemether | 80 |    | 0.7633 | 12.89 |
| artemether | 80 |    | 0.7774 | 12.91 |
| artemether | 80 |    | 0.7737 | 12.89 |
| artemether | 80 |    | 0.7694 | 12.92 |
| artemether | 80 |    | 0.7633 | 12.95 |
| artemether | 80 |    | 0.7764 | 12.90 |
| artemether | 80 |    | 0.7582 | 12.82 |
| artemether | 80 |    | 0.7724 | 12.89 |
| artemether | 80 |    | 0.7638 | 12.90 |
| artemether | 80 |    | 0.7671 | 12.89 |
| artemether | 80 |    | 0.6694 | 12.03 |
| artemether | 80 |    | 0.6966 | 12.07 |
| artemether | 80 |    | 0.6951 | 12.10 |
| artemether | 80 |    | 0.6887 | 12.02 |
| artemether | 80 |    | 0.6740 | 12.13 |
| artemether | 80 |    | 0.7036 | 12.01 |
| artemether | 80 |    | 0.7028 | 12.09 |
| artemether | 80 |    | 0.6824 | 13.03 |
| artemether | 80 |    | 0.7224 | 13.06 |
| artemether | 80 |    | 0.6723 | 13.03 |
| artemether |    | 80 | 0.6866 | 7.75  |
| artemether | 80 |    | 0.6604 | 7.70  |
| artemether | 80 |    | 0.6778 | 7.73  |
| artemether | 80 |    | 0.8063 | 13.19 |
| artemether | 80 |    | 0.8223 | 13.22 |
| artemether | 80 |    | 0.6371 | 12.29 |
| artemether |    | 40 |        |       |
| artemether | 80 |    | 0.6181 | 12.64 |
| artemether | 80 |    | 0.5936 | 12.61 |
| artemether | 80 |    |        |       |
| artemether | 80 |    |        |       |
| artemether | 80 |    | 0.7274 | 12.58 |
| artemether | 80 |    | 0.7625 | 12.66 |
| artemether | 80 |    |        |       |
| artemether | 80 |    |        |       |
| artemether | 80 |    |        |       |
| artemether | 80 |    | 0.6636 | 12.24 |
| artemether | 80 |    | 0.6318 | 12.68 |
| artemether | 80 |    |        |       |



























|            |     |     |        |       |
|------------|-----|-----|--------|-------|
| artesanate |     | 100 | 0.2988 | 9.18  |
| artesanate |     | 100 |        |       |
| artesanate |     | 100 |        |       |
| artesanate |     | 100 |        |       |
| artesanate |     | 100 |        |       |
| artesanate |     | 100 |        |       |
| artesanate |     | 100 |        |       |
| artesanate | 100 |     |        |       |
| artesanate |     | 100 |        |       |
| artesanate |     | 100 |        |       |
| artesanate | 100 |     |        |       |
| artesanate |     | 100 |        |       |
| artesanate |     | 100 |        |       |
| artesanate |     | 100 |        |       |
| artesanate |     | 100 |        |       |
| artesanate |     | 100 |        |       |
| artesanate |     | 100 |        |       |
| artesanate | 100 |     |        |       |
| artesanate |     | 100 |        |       |
| artesanate |     | 100 |        |       |
| artesanate |     | 100 | 0.3003 | 9.19  |
| artesanate | 100 |     | 0.2935 | 9.18  |
| artesanate | 100 |     | 0.3014 | 9.16  |
| artesanate |     | 100 | 0.3006 | 9.16  |
| artesanate | 100 |     | 0.3041 | 9.18  |
| artesanate |     | 100 |        |       |
| artesanate |     | 100 |        |       |
| artesanate |     | 100 |        |       |
| artesanate |     | 100 |        |       |
| artesanate | 100 |     |        |       |
| artesanate |     | 100 |        |       |
| artesanate |     | 100 |        |       |
| artesanate | 100 |     |        |       |
| artesanate |     | 100 |        |       |
| artesanate |     | 100 |        |       |
| artesanate |     | 100 |        |       |
| artesanate |     | 100 |        |       |
| artesanate | 100 |     |        |       |
| artesanate |     | 100 |        |       |
| artesanate |     | 100 |        |       |
| artesanate |     | 100 |        |       |
| artesanate | 100 |     |        |       |
| artesanate |     | 100 |        |       |
| artesanate | 100 |     | 0.2390 | 9.30  |
| artesanate | 100 |     | 0.2728 | 9.19  |
| artesanate | 100 |     | 0.2434 | 9.30  |
| artesanate | 100 |     | 0.2606 | 9.27  |
| artesanate | 100 |     |        |       |
| artesanate | 200 |     | 0.4983 | 16.24 |
| artesanate | 200 |     | 0.4830 | 18.67 |

|            |     |     |        |       |
|------------|-----|-----|--------|-------|
| artesanate |     | 200 | 0.5094 | 16.29 |
| artesanate |     | 25  |        |       |
| artesanate |     | 25  | 0.5073 |       |
| artesanate |     | 25  | 0.4779 |       |
| artesanate |     | 25  | 0.4885 |       |
| artesanate |     | 25  | 0.4849 |       |
| artesanate |     | 25  | 0.5118 |       |
| artesanate |     | 25  | 0.4873 |       |
| artesanate |     | 25  |        |       |
| artesanate |     | 25  |        |       |
| artesanate | 50  |     | 1.0272 |       |
| artesanate | 50  |     | 1.0439 |       |
| artesanate |     | 50  | 1.0049 |       |
| artesanate | 50  |     | 1.0612 |       |
| artesanate |     | 50  | 0.9848 |       |
| artesanate | 50  |     |        |       |
| artesanate | 50  |     |        |       |
| artesanate | 50  |     |        |       |
| artesanate | 50  |     |        |       |
| artesanate |     | 50  |        |       |
| artesanate |     | 50  |        |       |
| artesanate |     | 50  |        |       |
| artesanate | 50  |     |        |       |
| artesanate |     | 50  |        |       |
| artesanate |     | 50  |        |       |
| artesanate | 50  |     |        |       |
| artesanate | 50  |     |        |       |
| artesanate |     | 50  |        |       |
| artesanate | 50  |     |        |       |
| artesanate | 50  |     |        |       |
| artesanate |     | 50  |        |       |
| artesanate | 50  |     |        |       |
| artesanate | 50  |     |        |       |
| artesanate |     | 50  |        |       |
| artesanate | 50  |     |        |       |
| artesanate |     | 50  |        |       |
| artesanate | 100 |     | 0.2824 | 13.10 |
| artesanate | 100 |     | 0.2815 | 13.09 |
| artesanate | 100 |     | 0.2839 | 13.08 |
| artesanate | 100 |     | 0.2804 | 13.11 |
| artesanate | 100 |     | 0.2800 | 13.09 |
| artesanate | 100 |     |        |       |
| artesanate | 100 |     |        |       |
| artesanate | 100 |     |        |       |
| artesanate | 200 |     | 0.5720 | 18.37 |
| artesanate | 200 |     | 0.5597 | 18.40 |
| artesanate | 200 |     | 0.5464 | 18.48 |
| artesanate | 200 |     | 0.5545 | 19.16 |
| artesanate | 200 |     | 0.5629 | 19.13 |

|            |     |     |        |       |
|------------|-----|-----|--------|-------|
| artesanate | 200 |     | 0.5586 | 19.17 |
| artesanate | 200 |     | 0.5536 | 19.15 |
| artesanate | 200 |     | 0.5642 | 19.16 |
| artesanate | 200 |     |        |       |
| artesanate | 200 |     |        |       |
| artesanate | 200 |     |        |       |
| artesanate | 200 |     |        |       |
| artesanate | 200 |     |        |       |
| artesanate | 200 |     |        |       |
| artesanate | 200 |     |        |       |
| artesanate | 200 |     |        |       |
| artesanate | 200 |     |        |       |
| artesanate | 200 |     |        |       |
| artesanate | 200 |     |        |       |
| artesanate | 200 |     |        |       |
| artesanate | 200 |     |        |       |
| artesanate | 200 |     |        |       |
| artesanate | 200 |     |        |       |
| artesanate | 200 |     |        |       |
| artesanate | 200 |     |        |       |
| artesanate | 200 |     |        |       |
| artesanate | 200 |     |        |       |
| artesanate | 200 |     |        |       |
| artesanate | 200 |     |        |       |
| artesanate | 200 |     |        |       |
| artesanate | 200 |     |        |       |
| artesanate | 200 |     |        |       |
| artesanate | 200 |     |        |       |
| artesanate | 200 |     |        |       |
| artesanate | 200 |     |        |       |
| artesanate | 200 |     |        |       |
| artesanate | 200 |     |        |       |
| artesanate | 200 |     |        |       |
| artesanate | 200 |     |        |       |
| artesanate | 200 |     |        |       |
| artesanate | 200 |     |        |       |
| artesanate | 200 |     | 0.5428 | 12.93 |
| artesanate | 50  |     | 0.1922 | 8.31  |
| artesanate | 100 |     | 0.3894 | 11.43 |
| artesanate | 100 |     | 0.2831 | 10.22 |
| artesanate | 100 |     | 0.2810 | 10.18 |
| artesanate | 100 |     | 0.2879 | 10.26 |
| artesanate | 100 |     | 0.2797 | 10.27 |
| artesanate | 100 |     | 0.2863 | 10.22 |
| artesanate | 200 |     | 0.4881 | 16.17 |
| artesanate | 200 |     | 0.5188 | 16.25 |
| artesanate | 200 |     | 0.5300 | 12.22 |
| artesanate | 200 |     | 0.4716 |       |
| artesanate | 100 |     | 0.6055 | 12.62 |
| artesanate |     | 100 | 0.6062 | 12.58 |
| artesanate | 100 |     | 0.6006 | 12.60 |
| artesanate | 100 |     | 0.6004 | 12.60 |
| artesanate | 100 |     | 0.5901 | 12.57 |
| artesanate |     | 100 |        |       |

|                    |     |        |       |
|--------------------|-----|--------|-------|
| artesunate         | 100 |        |       |
| artesunate         | 100 |        |       |
| artesunate         | 100 |        |       |
| dihydroartemisinin | 30  |        |       |
| artesunate         | 200 | 1.2034 | 21.86 |
| artesunate         | 200 | 1.1977 | 21.82 |
| artesunate         | 200 | 1.2224 | 21.81 |
| artesunate         | 200 | 1.2178 | 21.79 |
| artesunate         | 200 | 1.2069 | 21.79 |
| artesunate         | 200 |        |       |
| artesunate         |     | 200    |       |
| artesunate         | 200 |        |       |
| artesunate         | 200 |        |       |
| artesunate         | 200 |        |       |
| artesunate         | 200 |        |       |
| artesunate         | 200 |        |       |
| artesunate         | 200 |        |       |
| artesunate         | 200 |        |       |
| artesunate         | 200 |        |       |
| artesunate         | 200 |        |       |
| artesunate         | 200 |        |       |
| artesunate         | 100 |        |       |
| artesunate         | 200 |        |       |
| dihydroartemisinin | 60  | 0.1969 | 8.21  |
| dihydroartemisinin | 60  | 0.2022 | 8.25  |
| dihydroartemisinin | 60  | 0.2032 | 8.17  |
| dihydroartemisinin | 60  |        |       |
| dihydroartemisinin | 60  |        |       |
| dihydroartemisinin | 60  |        |       |
| dihydroartemisinin | 60  |        |       |
| dihydroartemisinin | 60  |        |       |
| dihydroartemisinin | 60  |        |       |
| dihydroartemisinin | 60  |        |       |
| dihydroartemisinin | 60  | 0.2374 | 9.03  |
| dihydroartemisinin | 60  | 0.2376 | 9.07  |
| dihydroartemisinin | 60  | 0.2486 | 9.08  |
| dihydroartemisinin | 60  | 0.2498 | 9.28  |
| dihydroartemisinin | 60  | 0.2551 | 9.26  |
| dihydroartemisinin | 60  | 0.2514 | 9.28  |
| dihydroartemisinin | 30  | 0.5437 | 12.65 |
| dihydroartemisinin | 30  | 0.5283 | 12.69 |
| dihydroartemisinin | 30  | 0.5333 | 12.63 |
| dihydroartemisinin | 30  | 0.5476 | 12.68 |
| dihydroartemisinin | 30  | 0.5250 | 12.65 |
| dihydroartemisinin | 30  | 0.5271 | 12.68 |
| dihydroartemisinin | 30  | 0.6118 | 12.22 |
| dihydroartemisinin | 30  | 0.5730 | 12.65 |
| dihydroartemisinin | 30  | 0.5466 | 12.70 |
| dihydroartemisinin | 30  | 0.5334 | 12.68 |
| dihydroartemisinin | 30  |        |       |



























|            |    |        |      |
|------------|----|--------|------|
| artemether | 20 |        |      |
| artemether | 20 |        |      |
| artemether | 20 |        |      |
| artemether | 20 |        |      |
| artemether | 20 |        |      |
| artemether | 20 |        |      |
| artemether | 20 |        |      |
| artemether | 20 | 0.3360 | 9.44 |
| artemether | 20 | 0.3356 | 9.43 |
| artemether | 20 |        |      |
| artemether | 20 |        |      |
| artemether | 20 | 0.2427 | 9.08 |
| artemether | 20 |        |      |
| artemether | 20 | 0.2401 | 9.06 |
| artemether | 20 |        |      |
| artemether | 20 |        |      |
| artemether | 20 |        |      |
| artemether | 20 |        |      |
| artemether | 20 |        |      |
| artemether | 20 |        |      |
| artemether | 20 |        |      |
| artemether | 20 |        |      |
| artemether | 20 |        |      |
| artemether | 20 | 0.2863 | 9.2  |
| artemether | 20 | 0.2845 | 9.18 |
| artemether | 20 | 0.2879 | 9.24 |
| artemether | 20 | 0.2861 | 9.15 |
| artemether | 20 | 0.2863 | 9.17 |
| artemether | 20 |        |      |
| artemether | 20 |        |      |
| artemether | 20 |        |      |
| artemether | 20 |        |      |
| artemether | 20 |        |      |
| artemether | 20 |        |      |
| artemether | 20 |        |      |
| artemether | 20 |        |      |
| artemether | 20 |        |      |
| artemether | 20 |        |      |
| artemether | 20 |        |      |
| artemether | 20 | 0.2461 | 9.25 |
| artemether | 20 | 0.2502 | 9.17 |
| artemether | 20 | 0.2485 | 9.17 |
| artemether | 20 | 0.2494 | 9.17 |
| artemether | 20 | 0.2483 | 9.16 |
| artemether | 20 | 0.2450 | 9.16 |
| artemether | 20 | 0.2458 | 9.17 |
| artemether | 20 | 0.2437 | 9.22 |
| artemether | 20 | 0.2446 | 9.10 |







|            |    |        |       |
|------------|----|--------|-------|
| artemether | 80 | 0.7296 | 12.78 |
| artemether | 80 | 0.7527 | 12.75 |
| artemether | 80 | 0.6919 | 12.24 |
| artemether | 80 | 0.6982 | 12.29 |
| artemether | 80 | 0.7117 | 12.28 |
| artemether | 80 | 0.6156 | 12.72 |
| artemether | 80 | 0.6405 | 12.86 |
| artemether | 80 | 0.6254 | 12.72 |
| artemether | 80 | 0.6384 | 12.74 |
| artemether | 80 | 0.6405 | 12.71 |
| artemether | 80 |        |       |
| artemether | 80 |        |       |
| artemether | 80 | 0.8415 | 14.24 |
| artemether | 80 | 0.8309 | 14.27 |
| artemether | 80 | 0.8456 | 14.22 |
| artemether | 80 | 0.8552 | 14.14 |
| artemether | 80 | 0.8480 | 14.19 |
| artemether | 80 |        |       |
| artemether | 80 |        |       |
| artemether | 80 | 0.7738 | 12.25 |
| artemether | 80 | 0.7618 | 12.23 |
| artemether | 80 | 0.7470 | 12.00 |
| artemether | 80 | 0.6640 | 12.01 |
| artemether | 80 | 0.7738 | 12.89 |
| artemether | 80 | 0.7619 | 12.99 |
| artemether | 80 | 0.7807 | 12.88 |
| artemether | 80 | 0.7586 | 12.96 |
| artemether | 80 | 0.7688 | 12.87 |
| artemether | 80 | 0.6909 | 12.29 |
| artemether | 80 | 0.6929 | 12.13 |
| artemether | 80 | 0.6828 | 12.16 |
| artemether | 80 | 0.6990 | 12.15 |
| artemether | 80 | 0.6769 | 12.13 |
| artemether | 80 | 0.6840 | 12.16 |
| artemether | 80 |        |       |
| artemether | 80 |        |       |
| artemether | 80 |        |       |
| artemether | 80 |        |       |
| artemether | 80 | 0.6700 | 16.10 |
| artemether | 80 | 0.7018 | 12.49 |
| artemether | 80 | 0.6957 | 12.48 |
| artemether | 80 | 0.7015 | 11.92 |
| artemether | 80 | 0.6820 | 11.91 |
| artemether | 80 | 0.7750 | 11.92 |
| artemether | 80 | 0.6704 | 11.95 |
| artemether | 80 | 0.7126 | 11.92 |
| artemether | 80 |        |       |
| artemether | 80 |        |       |







|            |    |        |       |
|------------|----|--------|-------|
| artemether | 80 |        |       |
| artemether | 80 |        |       |
| artemether | 80 |        |       |
| artemether | 80 |        |       |
| artemether | 80 |        |       |
| artemether | 80 |        |       |
| artemether | 80 |        |       |
| artemether | 80 |        |       |
| artemether | 80 |        |       |
| artemether | 80 |        |       |
| artemether | 80 |        | 13.64 |
| artemether | 80 |        | 13.63 |
| artemether | 80 |        | 13.61 |
| artemether | 80 |        | 13.59 |
| artemether | 80 |        | 13.63 |
| artemether | 80 |        | 12.92 |
| artemether | 80 |        | 12.13 |
| artemether | 80 |        | 12.04 |
| artemether | 80 |        | 12.04 |
| artemether | 80 |        | 12.06 |
| artemether | 80 |        | 12.11 |
| artemether | 80 |        |       |
| artemether | 80 |        |       |
| artemether | 80 |        |       |
| artemether | 80 |        |       |
| artemether | 80 |        | 14.17 |
| artemether | 80 |        | 14.24 |
| artemether | 80 |        | 14.19 |
| artemether | 80 |        | 14.2  |
| artemether | 80 |        | 14.17 |
| artemether | 80 |        |       |
| artemether | 80 |        |       |
| artemether | 80 |        | 12.02 |
| artemether | 80 |        | 11.95 |
| artemether | 80 |        | 11.91 |
| artemether | 80 |        | 12.04 |
| artemether | 80 |        | 12.04 |
| artemether | 80 |        |       |
| artemether | 80 |        |       |
| artemether | 80 |        |       |
| artemether | 80 |        | 19.1  |
| artemether | 80 |        | 19.22 |
| artemether | 80 |        | 19.2  |
| artemether | 80 |        | 19.23 |
| artemether | 80 |        | 19.02 |
| artesunate | 50 | 0.2927 | 9.08  |
| artesunate | 50 | 0.2776 | 9.73  |





















| LSHTM                 | CDC | GT MS2 | strengthege2 |
|-----------------------|-----|--------|--------------|
| 103.1                 |     |        | 120          |
| 90.3                  |     |        | 120          |
| 94.7                  |     |        | 120          |
| 89.7                  |     |        | 120          |
| 92.5                  |     |        | 120          |
| 97.0                  |     |        | 120          |
| 97.5                  |     |        | 120          |
| 96.6                  |     |        | 120          |
| 97.3                  |     |        | 120          |
| 97.9                  |     |        | 120          |
| 92.3                  |     |        | 120          |
| 100.8                 |     |        | 120          |
| 90.7                  |     |        | 120          |
| 93.5                  |     |        | 120          |
| 95.6                  |     |        | 120          |
| 98.6                  |     |        | 120          |
| 93.7                  |     |        | 120          |
| 91.4                  |     |        | 120          |
| 109.7                 |     |        | 120          |
| 99.2                  |     |        | 120          |
| 89.4                  |     |        | 120          |
| 100.1                 |     |        | 120          |
| 94.6                  |     |        | 120          |
| 98.7                  |     |        | 120          |
| 99.5                  |     |        | 120          |
| <b>Not detectable</b> |     |        | 120          |
| 100.2                 |     |        | 120          |
| 94.2                  |     |        | 120          |
| 97.4                  |     |        | 120          |
| 100.5                 |     |        | 120          |
| 92.6                  |     |        | 120          |
| 98.1                  |     |        | 120          |
| 99.4                  |     |        | 120          |
| 99.6                  |     |        | 120          |
| 102.7                 |     |        | 120          |
| 100.3                 |     |        | 120          |
| 97.9                  |     |        | 120          |
| 96.5                  |     |        | 120          |
| 99.8                  |     |        | 120          |
| 98.4                  |     |        | 120          |
| 104.6                 |     |        | 120          |
| 106.2                 |     |        | 120          |
| 103.0                 |     |        | 120          |
| 107.7                 |     |        | 120          |
| 104.8                 |     |        | 120          |
| 112.4                 |     |        | 120          |

|                |       |     |
|----------------|-------|-----|
| 123.1          |       | 120 |
| 95.8           |       | 120 |
| 99.8           |       | 120 |
| 88.3           |       | 120 |
| 92.4           |       | 120 |
| 95.3           |       | 120 |
| 90.6           |       | 120 |
| 92.7           |       | 120 |
| 98.8           |       | 120 |
| 98.4           |       | 120 |
| 104.1          |       | 120 |
| 124.6          |       | 120 |
| 99.7           |       | 240 |
| 97.7           |       | 240 |
| 96             |       | 240 |
| 93.8           |       | 240 |
| 106.3          |       | 240 |
|                |       | 240 |
|                |       | 240 |
| 114.5          |       | 480 |
| 105.6          |       | 480 |
| 99.4           |       | 480 |
| 95.0           |       | 480 |
| 108.0          |       | 480 |
| Not detectable |       | 480 |
| 101.6          |       | 480 |
|                | 101.6 | 480 |
| 112.6          |       | 480 |
| 102.0          |       | 480 |
| 108.1          |       | 480 |
| 106.7          |       | 480 |
| 103.7          |       | 480 |
| 95.1           |       | 480 |
| 109.9          |       | 480 |
| 110            |       | 480 |
| 105.3          |       | 480 |
| 103.2          |       | 480 |
| 100.7          |       | 480 |
| 86.7           |       | 480 |
| 94.4           |       | 480 |
| 92.9           |       | 480 |
| 95.8           |       | 480 |
| 99.8           |       | 480 |
| 88.3           |       | 480 |
| 92.4           |       | 480 |
| 95.3           |       | 480 |
| 90.6           |       | 480 |
| 92.7           |       | 480 |
| 98.8           |       | 480 |
| Degraded       |       | 480 |

|                       |       |     |     |
|-----------------------|-------|-----|-----|
| 94.8                  |       |     | 480 |
| 96.5                  |       |     | 480 |
| 86.8                  |       |     | 480 |
| 98.3                  |       |     | 480 |
| 91.7                  |       |     | 480 |
| 95.3                  |       |     | 480 |
| 90.6                  |       |     | 480 |
| 92.9                  |       |     | 480 |
| 90.1                  |       |     | 480 |
| 91.9                  |       |     | 480 |
| 92.7                  |       |     | 480 |
| 101.1                 |       |     | 480 |
| 98.8                  | 10.2  |     | 480 |
| 100.4                 |       |     | 480 |
| <b>Degraded</b>       |       |     | 480 |
| 96.5                  |       |     | 480 |
| 86.8                  |       |     | 480 |
| 98.3                  |       |     | 480 |
| 91.7                  |       |     | 480 |
| 95.3                  |       |     | 480 |
| 90.6                  |       |     | 480 |
| 92.9                  |       |     | 480 |
| 90.1                  |       |     | 480 |
| 91.9                  |       |     | 480 |
| 92.7                  |       |     | 480 |
| 98.8                  |       |     | 480 |
| 100.4                 |       |     | 480 |
| 92.7                  |       |     | 480 |
| 90.3                  |       |     | 480 |
| 90.6                  |       |     |     |
| 92.9                  |       |     |     |
| 90.1                  |       |     |     |
| 91.9                  |       |     |     |
| 102.8                 | 102.9 |     | 500 |
| <b>Not detectable</b> |       |     |     |
| 99.4                  | 90.5  | Yes |     |
| 102.5                 | 101.3 | Yes |     |
| 99.9                  | 99    | Yes |     |
| 95.6                  | 93.1  |     | 270 |
| 99.6                  | 102.5 |     | 270 |
| 98.3                  | 95    |     | 270 |
| 96.5                  | 96.5  |     | 270 |
| 94.8                  | 98.9  |     | 300 |
|                       |       |     | 300 |

|                       |                       |                       |       |
|-----------------------|-----------------------|-----------------------|-------|
|                       |                       |                       | 300   |
| 98.9                  | 101.2                 |                       | 300   |
| 97.5                  | 103.4                 |                       | 300   |
|                       |                       |                       | 300   |
| 99.6                  | 99.5                  |                       | 300   |
| 87.9                  |                       |                       | 306.3 |
| 89.6                  | 100.3                 |                       | 300   |
| 96.3                  | 91.2                  |                       | 125   |
| 99.5                  | 102.1                 |                       | 125   |
|                       |                       |                       |       |
| 98.6                  | 94.2                  |                       |       |
| 102.8                 | 102.9                 |                       | 600   |
| 96.3                  | 63.4                  |                       | 600   |
|                       | 68/99                 |                       | 780   |
|                       |                       |                       | 250   |
| 99.6                  | 100.2                 |                       | 250   |
| 96.3                  | 108.7                 |                       | 250   |
| 99.3                  | 104.3                 |                       | 250   |
| 98.5                  | 104.4                 |                       | 250   |
| 100.2                 | 102.8                 |                       | 250   |
| 103.2                 | 104.7                 |                       | 250   |
| <b>Not detectable</b> |                       |                       | 250   |
| 91.7                  |                       |                       | 500   |
| <b>Degraded</b>       | 73.3 / 47.9           |                       | 500   |
| <b>Degraded</b>       | 16.8 / 91.5           |                       | 500   |
| <b>99.6/98.6</b>      | 93.1/102.8            |                       | 500   |
| <b>98.6/99.6</b>      |                       |                       | 500   |
| <b>98.8/100.2</b>     | 85.8/102.2            |                       | 500   |
| <b>98.6/99.5</b>      | 96.3/96               |                       | 500   |
| <b>89.3/96.3</b>      | 99.4/98.1             |                       | 500   |
| 102.3                 | 101                   | Yes                   | 225   |
| 99.6                  | 7                     | Yes                   | 225   |
| <b>Not detectable</b> | <b>Not detectable</b> | <b>Not detectable</b> | 225   |
| <b>105.3</b>          | 104.8                 | Yes                   | 225   |
| <b>103.5</b>          | 106.8                 | Yes                   | 225   |
| <b>98.6</b>           | 101                   | Yes                   | 225   |
| <b>110.3</b>          | 127.6                 | Yes                   | 225   |
| <b>Not detectable</b> | <b>Not detectable</b> | <b>Not detectable</b> | 225   |
| <b>78.3</b>           | 110.9                 | Yes                   | 225   |
| <b>98.5</b>           | 99.6                  | Yes                   | 225   |
| <b>100.3</b>          | 109.6                 | Yes                   | 225   |
| <b>95.8</b>           | 106.6                 | Yes                   | 225   |
| <b>96.8</b>           | 109.9                 | Yes                   | 225   |
| <b>87.3</b>           | 107                   | Yes                   | 225   |
| <b>89.6</b>           | 104.9                 | Yes                   | 225   |
| <b>87.9</b>           | 78.1                  | Yes                   | 320   |
| <b>88.9</b>           | 81.7                  | Yes                   | 320   |
| <b>89.2</b>           | 88                    | Yes                   | 320   |

|      |      |     |     |
|------|------|-----|-----|
| 98.6 | 63.7 | Yes | 320 |
| 90.3 | 78.7 | Yes | 320 |
| 89.6 | 73.9 | Yes | 320 |
| 92.6 | 77.6 | Yes | 320 |
| 85.6 | 81.4 | Yes | 320 |

---

| Height (mm) | Length (mm) | analysis date | HPLC (%) mean of t |
|-------------|-------------|---------------|--------------------|
|             | 3.58        | 06/02/2013    | 88.8               |
|             | 3.51        | 06/02/2013    | 112.3              |
|             | 3.61        | 06/02/2013    | 104.2              |
|             | 3.03        | 01/02/2013    | 97.0               |
|             | 3.03        | 01/02/2013    | 110.2              |
|             | 3.03        | 01/02/2013    | 101.2              |
|             | 3.01        | 01/02/2013    | 97.2               |
|             | 3.06        | 01/02/2013    | 93.4               |
|             | 3.00        | 01/02/2013    | 102.2              |
|             | 3.09        | 01/02/2013    | 97.8               |
|             | 9.04        | 01/02/2013    | 97.3               |
|             | 3.06        | 01/02/2013    | 101.8              |
|             | 3.02        | 01/02/2013    | 99.2               |
|             | 3.06        | 01/02/2013    | 103.1              |
|             | 3.16        | 01/02/2013    | 97.7               |
|             | 3.09        | 01/02/2013    | 100.6              |
|             | 3.10        | 01/02/2013    | 96.2               |
|             | 3.07        | 01/02/2013    | 105.5              |
|             | 3.08        | 01/02/2013    | 91.7               |
|             | 3.05        | 01/02/2013    | 103.0              |
|             | 3.07        | 01/02/2013    | 93.4               |
|             | 3.08        | 01/02/2013    | 100.0              |
|             | 3.10        | 01/02/2013    | 97.4               |
|             | 3.05        | 01/02/2013    | 103.0              |
|             | 3.07        | 01/02/2013    | 101.2              |
|             | 3.06        | 01/02/2013    | 98.5               |
|             | 3.06        | 01/02/2013    | 112.5              |
|             | 3.08        | 01/02/2013    | 110.3              |
|             | 3.04        | 01/02/2013    | 104.1              |
|             | 3.04        | 01/02/2013    | 101.4              |
|             | 3.10        | 01/02/2013    | 102.5              |
|             | 3.05        | 01/02/2013    | 98.2               |
|             | 3.05        | 01/02/2013    | 92.7               |
|             | 3.09        | 01/02/2013    | 94.9               |
|             | 3.07        | 01/02/2013    | 97.0               |
|             | 3.08        | 01/02/2013    | 104.3              |
|             | 3.09        | 01/02/2013    | 88.8               |
|             | 3.02        | 01/02/2013    | 87.0               |
|             | 3.10        | 01/02/2013    | 90.1               |



|      |            |       |
|------|------------|-------|
| 3.02 | 01/02/2013 | 109.3 |
| 3.04 | 01/02/2013 | 112.0 |
| 3.13 | 01/02/2013 | 101.4 |
| 3.08 | 01/02/2013 | 107.3 |
| 3.07 | 01/02/2013 | 93.5  |
| 3.04 | 01/02/2013 | 98.4  |
| 3.03 | 01/02/2013 | 96.9  |
| 3.08 | 04/02/2013 | 90.9  |
| 3.10 | 04/02/2013 | 97.3  |
| 3.04 | 04/02/2013 | 96.3  |
| 3.17 | 04/02/2013 | 95.9  |
| 3.07 | 04/02/2013 | 93.8  |
| 3.09 | 04/02/2013 | 96.1  |
| 2.98 | 04/02/2013 | 92.7  |
| 3.04 | 04/02/2013 | 90.6  |
| 3.03 | 04/02/2013 | 92.4  |
| 2.95 | 04/02/2013 | 96.2  |
| 3.06 | 04/02/2013 | 97.9  |
| 3.06 | 04/02/2013 | 89.0  |
| 3.05 | 04/02/2013 | 95.2  |
| 3.10 | 04/02/2013 | 94.1  |
| 3.02 | 04/02/2013 | 97.7  |
| 3.06 | 04/02/2013 | 95.2  |
| 3.08 | 04/02/2013 | 92.9  |
| 3.02 | 04/02/2013 | 96.1  |
| 3.03 | 04/02/2013 | 97.8  |
| 3.10 | 04/02/2013 | 95.4  |
| 3.04 | 04/02/2013 | 102.4 |
| 3.08 | 04/02/2013 | 95.7  |
| 3.02 | 04/02/2013 | 98.3  |
| 3.04 | 04/02/2013 | 91.5  |
| 3.09 | 04/02/2013 | 94.6  |
| 3.05 | 04/02/2013 | 93.9  |
| 3.08 | 04/02/2013 | 93.8  |
| 3.10 | 04/02/2013 | 95.1  |
| 3.10 | 04/02/2013 | 100.7 |
| 3.09 | 04/02/2013 | 96.8  |
| 3.13 | 04/02/2013 | 106.1 |
| 3.10 | 04/02/2013 | 100.5 |
| 3.04 | 04/02/2013 | 85.4  |
| 3.05 | 04/02/2013 | 109.7 |
| 3.10 | 04/02/2013 | 100.2 |
| 3.70 | 04/02/2013 | 105.4 |
| 3.04 | 04/02/2013 | 108.5 |
| 3.18 | 04/02/2013 | 113.2 |
| 3.13 | 04/02/2013 | 102.6 |
| 3.00 | 04/02/2013 | 106.3 |
| 3.09 | 04/02/2013 | 102.1 |
| 3.07 | 04/02/2013 | 100.4 |
| 3.10 | 04/02/2013 | 102.7 |

|      |            |       |
|------|------------|-------|
| 3.08 | 04/02/2013 | 93.5  |
| 3.12 | 04/02/2013 | 114.1 |
| 3.14 | 04/02/2013 | 98.1  |
| 3.05 | 04/02/2013 | 103.7 |
| 3.03 | 04/02/2013 | 103.0 |
| 3.14 | 04/02/2013 | 103.7 |
| 3.09 | 04/02/2013 | 96.8  |
| 3.11 | 04/02/2013 | 100.5 |
| 3.03 | 04/02/2013 | 95.7  |
| 3.09 | 04/02/2013 | 102.4 |
| 3.05 | 04/02/2013 | 98.9  |
| 3.09 | 04/02/2013 | 110.6 |
| 3.06 | 04/02/2013 | 97.4  |
| 3.07 | 04/02/2013 | 96.5  |
| 3.12 | 04/02/2013 | 95.1  |
| 3.11 | 05/02/2013 | 92.1  |
| 3.06 | 05/02/2013 | 94.5  |
| 3.00 | 05/02/2013 | 98.6  |
| 3.04 | 05/02/2013 | 86.8  |
| 3.10 | 05/02/2013 | 95.5  |
| 3.02 | 05/02/2013 | 92.8  |
| 3.04 | 05/02/2013 | 90.1  |
| 3.06 | 05/02/2013 | 90.5  |
| 3.00 | 05/02/2013 | 96.1  |
| 3.02 | 05/02/2013 | 93.6  |
| 2.99 | 05/02/2013 | 96.4  |
| 3.10 | 05/02/2013 | 103.8 |
| 3.07 | 05/02/2013 | 98.1  |
| 3.01 | 05/02/2013 | 99.0  |
| 3.04 | 05/02/2013 | 104.2 |
| 3.07 | 05/02/2013 | 92.0  |
| 3.10 | 05/02/2013 | 102.7 |
| 3.12 | 05/02/2013 | 99.8  |
| 3.11 | 05/02/2013 | 101.6 |
| 3.02 | 05/02/2013 | 107.5 |
| 3.13 | 05/02/2013 | 103.3 |
| 3.01 | 05/02/2013 | 96.1  |
| 3.05 | 05/02/2013 | 110.5 |
| 3.00 | 05/02/2013 | 99.2  |
| 3.02 | 05/02/2013 | 106.9 |
| 3.13 | 05/02/2013 | 98.2  |
| 3.07 | 05/02/2013 | 98.5  |
| 3.00 | 05/02/2013 | 104.6 |
| 3.01 | 05/02/2013 | 108.4 |
| 3.04 | 05/02/2013 | 105.9 |
| 3.08 | 05/02/2013 | 97.9  |
| 3.02 | 05/02/2013 | 101.2 |
| 3.13 | 05/02/2013 | 109.0 |
| 3.14 | 05/02/2013 | 98.0  |
| 3.05 | 05/02/2013 | 100.1 |

|      |            |              |
|------|------------|--------------|
| 3.06 | 05/02/2013 | <b>100.5</b> |
| 3.06 | 05/02/2013 | <b>99.9</b>  |
| 3.07 | 05/02/2013 | <b>97.5</b>  |
| 3.06 | 05/02/2013 | <b>103.1</b> |
| 3.01 | 05/02/2013 | <b>100.0</b> |
| 3.14 | 05/02/2013 | <b>100.3</b> |
| 3.03 | 05/02/2013 | <b>106.6</b> |
| 3.00 | 05/02/2013 | <b>104.1</b> |
| 3.17 | 05/02/2013 | <b>107.2</b> |
| 3.07 | 05/02/2013 | <b>108.7</b> |
| 3.02 | 05/02/2013 | <b>111.5</b> |
| 3.03 | 05/02/2013 | <b>104.2</b> |
| 3.03 | 05/02/2013 | <b>114.2</b> |
| 3.09 | 05/02/2013 | <b>112.3</b> |
| 3.08 | 05/02/2013 | <b>114.7</b> |
| 3.03 | 05/02/2013 | <b>114.5</b> |
| 3.02 | 05/02/2013 | <b>100.8</b> |
| 3.12 | 05/02/2013 | <b>100.5</b> |
| 3.67 | 06/02/2013 | <b>84.3</b>  |
| 3.62 | 06/02/2013 | <b>87.1</b>  |
| 3.67 | 06/02/2013 | <b>94.6</b>  |
| 3.63 | 06/02/2013 | <b>64.6</b>  |
| 3.71 | 06/02/2013 | <b>93.1</b>  |
| 3.64 | 06/02/2013 | <b>97.1</b>  |
| 3.73 | 06/02/2013 | <b>98.9</b>  |
| 3.66 | 06/02/2013 | <b>94.9</b>  |
| 3.65 | 06/02/2013 | <b>105.2</b> |
| 3.68 | 06/02/2013 | <b>95.2</b>  |
| 3.72 | 06/02/2013 | <b>109.8</b> |
| 3.69 | 06/02/2013 | <b>101.5</b> |
| 3.75 | 06/02/2013 | <b>43.0</b>  |
| 3.65 | 06/02/2013 | <b>90.7</b>  |
| 3.66 | 06/02/2013 | <b>111.6</b> |
| 4.68 | 06/02/2013 | <b>0.3</b>   |
| 4.56 | 06/02/2013 | <b>0.8</b>   |
| 4.65 | 06/02/2013 | <b>1.1</b>   |
| 4.68 | 06/02/2013 | <b>0.5</b>   |
| 4.80 | 06/02/2013 | <b>0.3</b>   |
| 4.65 | 06/02/2013 | <b>1.2</b>   |
| 4.70 | 06/02/2013 | <b>0.3</b>   |
| 4.76 | 06/02/2013 | <b>0.9</b>   |
| 4.67 | 06/02/2013 | <b>0.1</b>   |
| 4.66 | 06/02/2013 | <b>0.5</b>   |
| 4.57 | 06/02/2013 | <b>0.4</b>   |
| 3.15 | 06/02/2013 | <b>105.1</b> |
| 3.42 | 06/02/2013 | <b>103.9</b> |
| 3.34 | 06/02/2013 | <b>106.7</b> |
| 3.30 | 06/02/2013 | <b>109.5</b> |
| 3.24 | 06/02/2013 | <b>111.3</b> |
| 3.28 | 06/02/2013 | <b>109.3</b> |

|      |            |       |
|------|------------|-------|
| 3.28 | 06/02/2013 | 107.9 |
| 3.25 | 06/02/2013 | 108.4 |
| 3.26 | 06/02/2013 | 106.3 |
| 3.24 | 06/02/2013 | 111.8 |
| 3.45 | 06/02/2013 | 106.8 |
| 3.47 | 06/02/2013 | 106.8 |
| 3.46 | 06/02/2013 | 94.2  |
| 3.18 | 06/02/2013 | 99.0  |
| 3.25 | 07/02/2013 | 101.8 |
| 3.25 | 07/02/2013 | 100.5 |
| 3.08 | 07/02/2013 | 103.4 |
| 3.09 | 07/02/2013 | 103.5 |
| 2.99 | 07/02/2013 | 100.3 |
| 3.12 | 07/02/2013 | 104.9 |
| 3.04 | 07/02/2013 | 103.9 |
| 3.07 | 07/02/2013 | 84.6  |
| 3.04 | 07/02/2013 | 68.4  |
| 3.11 | 07/02/2013 | 62.9  |
| 3.23 | 07/02/2013 | 42.5  |
| 3.23 | 07/02/2013 | 102.9 |
| 3.16 | 07/02/2013 | 107.2 |
| 3.19 | 07/02/2013 | 107.1 |
| 3.18 | 07/02/2013 | 107.3 |
| 3.17 | 07/02/2013 | 88.5  |
| 3.16 | 08/02/2013 | 107.6 |
| 3.15 | 08/02/2013 | 107.5 |
| 3.10 | 08/02/2013 | 104.7 |
| 3.18 | 08/02/2013 | 108.4 |
| 3.16 | 08/02/2013 | 110.4 |
| 3.21 | 08/02/2013 | 103.8 |
| 3.18 | 08/02/2013 | 107.7 |
| 3.19 | 08/02/2013 | 112.7 |
| 3.14 | 08/02/2013 | 107.1 |
| 3.16 | 08/02/2013 | 108.8 |
| 3.14 | 08/02/2013 | 111.3 |
| 3.18 | 08/02/2013 | 109.4 |
| 3.18 | 08/02/2013 | 114.3 |
| 3.20 | 08/02/2013 | 100.0 |
| 3.17 | 08/02/2013 | 106.9 |
| 3.16 | 08/02/2013 | 109.7 |
| 3.16 | 08/02/2013 | 105.8 |
| 3.13 | 08/02/2013 | 109.0 |
| 3.15 | 08/02/2013 | 104.3 |
| 3.16 | 08/02/2013 | 104.3 |
| 3.14 | 08/02/2013 | 103.7 |
| 3.15 | 08/02/2013 | 92.1  |
| 3.16 | 08/02/2013 | 96.3  |
| 3.17 | 08/02/2013 | 94.1  |
| 3.16 | 08/02/2013 | 91.6  |
| 3.13 | 08/02/2013 | 91.5  |

|      |            |                |
|------|------------|----------------|
| 3.17 | 08/02/2013 | 87.4           |
| 3.16 | 08/02/2013 | 101.8          |
| 3.16 | 08/02/2013 | 96.4           |
| 3.16 | 08/02/2013 | 93.0           |
| 3.16 | 08/02/2013 | 96.3           |
| 3.15 | 08/02/2013 | 98.3           |
| 3.17 | 08/02/2013 | 94.2           |
| 3.14 | 08/02/2013 | 89.2           |
| 3.15 | 08/02/2013 | 99.4           |
| 3.17 | 08/02/2013 | 91.4           |
| 3.18 | 08/02/2013 | 92.5           |
| 3.16 | 08/02/2013 | 111.1          |
| 3.17 | 08/02/2013 | 95.0           |
| 3.18 | 08/02/2013 | 112.1          |
| 3.08 | 11/02/2013 | 106.8          |
| 3.09 | 11/02/2013 | 110.3          |
| 3.06 | 11/02/2013 | 107.3          |
| 3.09 | 11/02/2013 | 107.8          |
| 2.99 | 11/02/2013 | 106.0          |
| 3.11 | 11/02/2013 | 99.7           |
| 3.07 | 11/02/2013 | 99.9           |
| 3.09 | 11/02/2013 | 99.9           |
| 3.05 | 11/02/2013 | 110.3          |
| 3.15 | 11/02/2013 | 112.7          |
| 3.07 | 11/02/2013 | 106.2          |
| 3.04 | 11/02/2013 | 112.0          |
| 3.15 | 11/02/2013 | 86.4           |
| 3.22 | 11/02/2013 | 92.7           |
| 3.10 | 11/02/2013 | 94.8           |
| 3.18 | 11/02/2013 | 87.0           |
| 3.07 | 11/02/2013 | 94.4           |
| 3.16 | 11/02/2013 | 93.2           |
| 3.17 | 11/02/2013 | 87.1           |
| 3.13 | 11/02/2013 | 85.6           |
| 3.13 | 11/02/2013 | 90.6           |
| 3.19 | 11/02/2013 | 96.1           |
| 3.15 | 11/02/2013 | 95.6           |
| 3.14 | 11/02/2013 | 102.2          |
| 3.19 | 11/02/2013 | 105.6          |
| 3.22 | 11/02/2013 | 93.5           |
| 3.14 | 11/02/2013 | 90.9           |
| 3.11 | 11/02/2013 | 93.3           |
| 3.16 | 11/02/2013 | 103.5          |
| 3.16 | 11/02/2013 | 101.0          |
| 3.19 | 11/02/2013 | 108.6          |
| 3.17 | 11/02/2013 | 93.8           |
| 3.17 | 11/02/2013 | 90.1           |
| 3.40 | 11/02/2013 | Not detectable |
| 3.17 | 11/02/2013 | 106.1          |
| 3.10 | 11/02/2013 | 104.1          |

|      |            |                |
|------|------------|----------------|
| 3.18 | 11/02/2013 | 91.3           |
| 3.13 | 11/02/2013 | 97.2           |
| 3.18 | 11/02/2013 | 100.7          |
| 3.20 | 11/02/2013 | 92.5           |
| 3.13 | 11/02/2013 | 96.7           |
| 3.15 | 11/02/2013 | 98.2           |
| 3.19 | 11/02/2013 | 97.2           |
| 3.22 | 11/02/2013 | 92.7           |
| 3.15 | 11/02/2013 | 105.3          |
| 3.09 | 11/02/2013 | 100.0          |
| 3.06 | 11/02/2013 | 87.5           |
| 3.11 | 11/02/2013 | 109.3          |
| 3.14 | 11/02/2013 | 113.3          |
| 3.16 | 11/02/2013 | 107.6          |
| 3.11 | 11/02/2013 | 109.1          |
| 3.13 | 11/02/2013 | 110.6          |
| 3.13 | 11/02/2013 | 108.1          |
| 3.21 | 11/02/2013 | 100.2          |
| 3.10 | 11/02/2013 | 94.1           |
| 3.13 | 11/02/2013 | 96.1           |
| 3.15 | 11/02/2013 | 109.3          |
| 3.19 | 11/02/2013 | 98.2           |
| 3.12 | 11/02/2013 | 109.5          |
| 3.16 | 11/02/2013 | 92.6           |
| 3.18 | 11/02/2013 | 110.7          |
| 3.10 | 11/02/2013 | 91.8           |
| 3.12 | 11/02/2013 | 97.6           |
| 3.11 | 11/02/2013 | 96.3           |
| 3.12 | 11/02/2013 | 112.4          |
| 3.15 | 11/02/2013 | 114.8          |
| 3.21 | 11/02/2013 | 109.0          |
| 3.31 | 11/02/2013 | Not detectable |
| 3.18 | 11/02/2013 | 108.1          |
| 3.01 | 11/02/2013 | 100.3          |
| 3.18 | 11/02/2013 | 94.8           |
| 3.01 | 11/02/2013 | 101.6          |
| 3.16 | 11/02/2013 | 99.2           |
| 3.11 | 11/02/2013 | 92.4           |
| 3.21 | 11/02/2013 | 99.9           |
| 3.23 | 11/02/2013 | 91.9           |
| 3.10 | 11/02/2013 | 99.3           |
| 4.17 | 12/02/2013 | 106.5          |
| 4.28 | 12/02/2013 | 104.2          |
| 4.24 | 12/02/2013 | 102.2          |
| 4.25 | 12/02/2013 | 102.7          |
| 4.25 | 12/02/2013 | 104.5          |
| 4.14 | 12/02/2013 | 102.9          |
| 4.22 | 12/02/2013 | 105.0          |
| 4.21 | 12/02/2013 | 106.2          |
| 4.24 | 12/02/2013 | 102.0          |

|      |            |       |
|------|------------|-------|
| 4.20 | 12/02/2013 | 105.4 |
| 4.26 | 12/02/2013 | 97.4  |
| 4.27 | 12/02/2013 | 104.2 |
| 4.22 | 12/02/2013 | 100.7 |
| 4.23 | 12/02/2013 | 109.1 |
| 4.33 | 12/02/2013 | 106.1 |
| 4.18 | 12/02/2013 | 106.2 |
| 4.19 | 12/02/2013 | 107.9 |
| 4.23 | 12/02/2013 | 106.8 |
| 4.19 | 12/02/2013 | 101.1 |
| 4.20 | 12/02/2013 | 103.7 |
| 4.19 | 12/02/2013 | 98.1  |
| 4.27 | 12/02/2013 | 104.7 |
| 4.09 | 12/02/2013 | 114.7 |
| 4.17 | 12/02/2013 | 104.3 |
| 4.13 | 12/02/2013 | 106.9 |
| 4.22 | 12/02/2013 | 105.2 |
| 4.27 | 12/02/2013 | 104.1 |
| 4.20 | 12/02/2013 | 102.8 |
| 4.20 | 12/02/2013 | 107.3 |
| 4.19 | 12/02/2013 | 109.3 |
| 4.15 | 12/02/2013 | 106.8 |
| 4.15 | 12/02/2013 | 106.8 |
| 4.23 | 12/02/2013 | 102.3 |
| 4.16 | 12/02/2013 | 102.8 |
| 4.19 | 12/02/2013 | 103.6 |
| 4.24 | 12/02/2013 | 104.7 |
| 4.32 | 12/02/2013 | 103.1 |
| 4.21 | 12/02/2013 | 109.0 |
| 4.34 | 12/02/2013 | 108.9 |
| 4.22 | 12/02/2013 | 88.3  |
| 4.35 | 12/02/2013 | 100.1 |
| 4.20 | 12/02/2013 | 86.9  |
| 4.18 | 12/02/2013 | 102.8 |
| 4.29 | 12/02/2013 | 106.4 |
| 4.20 | 12/02/2013 | 108.8 |
| 4.24 | 12/02/2013 | 99.6  |
| 4.28 | 12/02/2013 | 113.0 |
| 4.23 | 12/02/2013 | 105.5 |
| 4.13 | 12/02/2013 | 105.3 |
| 4.20 | 12/02/2013 | 100.1 |
| 4.25 | 12/02/2013 | 109.2 |
| 4.21 | 12/02/2013 | 102.2 |
| 4.18 | 12/02/2013 | 104.1 |
| 4.33 | 12/02/2013 | 96.2  |
| 4.15 | 12/02/2013 | 107.3 |
| 4.15 | 12/02/2013 | 106.1 |
| 4.22 | 12/02/2013 | 101.8 |
| 4.22 | 12/02/2013 | 107.7 |
| 4.23 | 12/02/2013 | 104.2 |

|      |            |       |
|------|------------|-------|
| 4.21 | 12/02/2013 | 107.8 |
| 4.21 | 12/02/2013 | 104.0 |
| 4.28 | 12/02/2013 | 102.0 |
| 4.25 | 12/02/2013 | 104.8 |
| 4.18 | 12/02/2013 | 114.6 |
| 4.18 | 12/02/2013 | 104.3 |
| 4.19 | 12/02/2013 | 104.2 |
| 4.19 | 12/02/2013 | 109.9 |
| 4.29 | 12/02/2013 | 106.8 |
| 3.78 | 07/02/2013 | 113.7 |
| 3.85 | 07/02/2013 | 111.4 |
| 3.48 | 07/02/2013 | 101.7 |
| 3.13 | 07/02/2013 | 113.0 |
| 3.09 | 07/02/2013 | 106.3 |
| 3.11 | 07/02/2013 | 106.4 |
| 3.11 | 07/02/2013 | 95.8  |
| 3.09 | 07/02/2013 | 111.9 |
| 3.16 | 07/02/2013 | 97.8  |
| 3.11 | 07/02/2013 | 99.3  |
| 3.18 | 07/02/2013 | 111.8 |
| 3.09 | 07/02/2013 | 113.7 |
| 3.12 | 07/02/2013 | 92.7  |
| 3.23 | 07/02/2013 | 110.3 |
| 3.17 | 07/02/2013 | 106.5 |
| 3.20 | 07/02/2013 | 86.2  |
| 3.06 | 07/02/2013 | 108.3 |
| 3.23 | 07/02/2013 | 111.2 |
| 3.13 | 07/02/2013 | 100.4 |
| 3.17 | 07/02/2013 | 88.6  |
| 3.14 | 07/02/2013 | 110.5 |
| 3.11 | 07/02/2013 | 112.8 |
| 3.15 | 07/02/2013 | 105.1 |
| 3.11 | 07/02/2013 | 98.4  |
| 3.12 | 07/02/2013 | 99.5  |
| 3.22 | 07/02/2013 | 91.4  |
| 3.07 | 07/02/2013 | 113.6 |
| 3.13 | 07/02/2013 | 109.7 |
| 3.24 | 07/02/2013 | 92.1  |
| 3.16 | 07/02/2013 | 96.8  |
| 3.85 | 07/02/2013 | 95.7  |
| 3.93 | 07/02/2013 | 100.0 |
| 3.80 | 07/02/2013 | 100.6 |
| 4.95 | 07/02/2013 | 0.1   |
| 4.54 | 07/02/2013 | 94.0  |
| 4.43 | 19/02/2013 | 113.7 |
| 3.47 | 13/02/2013 | 92.2  |
| 3.46 | 13/02/2013 | 97.9  |
| 3.44 | 13/02/2013 | 100.4 |
| 3.61 | 13/02/2013 | 98.7  |
| 3.47 | 13/02/2013 | 96.8  |



|      |            |       |
|------|------------|-------|
| 3.41 | 13/02/2013 | 101.7 |
| 3.56 | 13/02/2013 | 111.8 |
| 3.56 | 13/02/2013 | 100.0 |
| 3.58 | 13/02/2013 | 94.6  |
| 3.63 | 13/02/2013 | 102.8 |
| 3.53 | 13/02/2013 | 92.1  |
| 3.57 | 13/02/2013 | 96.8  |
| 3.54 | 13/02/2013 | 105.6 |
| 3.54 | 13/02/2013 | 110.0 |
| 3.50 | 13/02/2013 | 106.6 |
| 3.62 | 13/02/2013 | 97.1  |
| 3.58 | 13/02/2013 | 100.8 |
| 3.52 | 13/02/2013 | 98.6  |
| 3.49 | 13/02/2013 | 97.8  |
| 3.68 | 13/02/2013 | 111.2 |
| 3.42 | 13/02/2013 | 99.6  |
| 3.66 | 13/02/2013 | 96.4  |
| 3.57 | 13/02/2013 | 108.1 |
| 3.54 | 13/02/2013 | 112.8 |
| 3.55 | 13/02/2013 | 107.2 |
| 3.64 | 13/02/2013 | 107.3 |
| 3.50 | 13/02/2013 | 100.5 |
| 3.56 | 13/02/2013 | 105.5 |
| 3.61 | 13/02/2013 | 106.9 |
| 3.70 | 13/02/2013 | 103.3 |
| 3.41 | 13/02/2013 | 102.7 |
| 3.66 | 13/02/2013 | 108.7 |
|      | 23/05/2013 | 105.5 |
| 3.66 | 13/02/2013 | 99.1  |
| 3.63 | 13/02/2013 | 100.9 |
| 3.47 | 13/02/2013 | 107.1 |
| 3.55 | 13/02/2013 | 111.3 |
| 3.67 | 13/02/2013 | 98.3  |
| 3.63 | 13/02/2013 | 107.1 |
| 3.63 | 13/02/2013 | 98.8  |
| 3.43 | 13/02/2013 | 105.9 |
| 3.45 | 13/02/2013 | 97.8  |
| 3.60 | 13/02/2013 | 104.2 |
| 3.48 | 13/02/2013 | 108.4 |
| 3.50 | 13/02/2013 | 108.8 |
| 3.53 | 14/02/2013 | 96.4  |
| 3.58 | 14/02/2013 | 98.4  |
| 3.62 | 14/02/2013 | 100.0 |
| 3.33 | 14/02/2013 | 98.0  |
| 3.51 | 14/02/2013 | 94.5  |
| 3.58 | 14/02/2013 | 101.5 |
| 3.48 | 14/02/2013 | 99.5  |
| 3.45 | 14/02/2013 | 96.8  |
| 3.56 | 14/02/2013 | 96.7  |
| 3.43 | 14/02/2013 | 97.3  |

|      |            |       |
|------|------------|-------|
| 3.48 | 14/02/2013 | 97.2  |
| 3.56 | 14/02/2013 | 105.5 |
| 3.45 | 14/02/2013 | 96.0  |
| 3.61 | 14/02/2013 | 100.1 |
| 3.57 | 14/02/2013 | 104.6 |
| 3.54 | 14/02/2013 | 100.0 |
| 3.53 | 14/02/2013 | 93.8  |
| 3.51 | 14/02/2013 | 94.6  |
| 3.62 | 14/02/2013 | 97.6  |
| 3.59 | 14/02/2013 | 96.0  |
| 3.54 | 14/02/2013 | 92.8  |
| 3.60 | 14/02/2013 | 87.0  |
| 3.59 | 14/02/2013 | 102.6 |
| 3.35 | 14/02/2013 | 100.5 |
| 3.45 | 14/02/2013 | 92.0  |
| 3.53 | 14/02/2013 | 90.7  |
| 3.43 | 14/02/2013 | 93.0  |
| 3.55 | 14/02/2013 | 93.0  |
| 3.55 | 14/02/2013 | 103.9 |
| 3.48 | 14/02/2013 | 100.0 |
| 3.47 | 14/02/2013 | 94.1  |
| 3.47 | 14/02/2013 | 92.4  |
| 3.58 | 14/02/2013 | 93.6  |
| 3.56 | 14/02/2013 | 96.1  |
| 3.60 | 14/02/2013 | 95.2  |
| 3.55 | 14/02/2013 | 87.1  |
| 3.51 | 14/02/2013 | 99.5  |
| 3.58 | 14/02/2013 | 101.5 |
| 3.46 | 14/02/2013 | 98.3  |
| 3.59 | 14/02/2013 | 100.1 |
| 3.57 | 14/02/2013 | 102.1 |
| 3.62 | 14/02/2013 | 103.6 |
| 3.50 | 14/02/2013 | 85.5  |
| 3.60 | 14/02/2013 | 101.0 |
| 3.63 | 14/02/2013 | 89.1  |
| 3.59 | 14/02/2013 | 91.7  |
| 3.59 | 14/02/2013 | 99.9  |
| 3.56 | 14/02/2013 | 88.9  |
| 3.54 | 14/02/2013 | 90.2  |
| 3.49 | 14/02/2013 | 89.6  |
| 3.53 | 14/02/2013 | 85.2  |
| 3.55 | 14/02/2013 | 102.4 |
| 3.63 | 14/02/2013 | 95.2  |
| 3.60 | 14/02/2013 | 98.3  |
| 3.59 | 14/02/2013 | 103.5 |
| 3.51 | 14/02/2013 | 95.5  |
| 3.41 | 14/02/2013 | 109.9 |
| 3.55 | 14/02/2013 | 110.0 |
| 3.59 | 14/02/2013 | 89.3  |
| 3.62 | 14/02/2013 | 103.9 |

|      |            |       |
|------|------------|-------|
| 3.48 | 14/02/2013 | 98.5  |
| 3.52 | 14/02/2013 | 96.3  |
| 3.53 | 14/02/2013 | 91.4  |
| 3.58 | 14/02/2013 | 103.2 |
| 3.49 | 14/02/2013 | 114.1 |
| 3.49 | 14/02/2013 | 94.5  |
| 3.55 | 14/02/2013 | 92.9  |
| 3.42 | 14/02/2013 | 93.8  |
| 3.47 | 14/02/2013 | 109.7 |
| 3.58 | 14/02/2013 | 109.7 |
| 3.43 | 14/02/2013 | 103.5 |
| 3.59 | 14/02/2013 | 100.1 |
| 3.59 | 14/02/2013 | 93.8  |
| 3.57 | 14/02/2013 | 93.8  |
| 3.57 | 14/02/2013 | 106.0 |
| 3.56 | 14/02/2013 | 99.8  |
| 3.56 | 14/02/2013 | 92.0  |
| 3.62 | 14/02/2013 | 109.6 |
| 3.46 | 14/02/2013 | 103.1 |
| 3.23 | 18/02/2013 | 100.4 |
| 3.18 | 18/02/2013 | 90.0  |
| 3.26 | 18/02/2013 | 95.1  |
| 3.36 | 18/02/2013 | 87.9  |
| 3.20 | 18/02/2013 | 93.2  |
| 3.33 | 18/02/2013 | 93.8  |
| 3.31 | 18/02/2013 | 90.5  |
| 3.44 | 18/02/2013 | 86.3  |
| 3.44 | 18/02/2013 | 90.7  |
| 3.46 | 18/02/2013 | 103.7 |
| 3.37 | 18/02/2013 | 87.5  |
| 3.39 | 18/02/2013 | 89.1  |
| 3.50 | 18/02/2013 | 91.2  |
| 3.55 | 18/02/2013 | 86.6  |
| 3.35 | 18/02/2013 | 101.1 |
| 3.61 | 18/02/2013 | 85.4  |
| 3.52 | 18/02/2013 | 91.1  |
| 3.51 | 18/02/2013 | 87.7  |
| 3.59 | 18/02/2013 | 102.9 |
| 3.55 | 18/02/2013 | 88.0  |
| 3.39 | 18/02/2013 | 89.8  |
| 3.46 | 18/02/2013 | 94.9  |
| 3.43 | 18/02/2013 | 92.5  |
| 3.43 | 18/02/2013 | 90.7  |
| 3.66 | 18/02/2013 | 103.2 |
| 4.60 | 19/02/2013 | 89.7  |
| 4.99 | 19/02/2013 | 105.0 |
| 4.89 | 19/02/2013 | 101.2 |
| 4.83 | 19/02/2013 | 100.4 |
| 4.94 | 19/02/2013 | 98.2  |
| 4.61 | 19/02/2013 | 94.0  |

|      |            |       |
|------|------------|-------|
| 5.07 | 19/02/2013 | 104.4 |
| 4.97 | 19/02/2013 | 99.5  |
| 5.00 | 19/02/2013 | 100.4 |
| 4.98 | 19/02/2013 | 106.3 |
| 5.00 | 19/02/2013 | 98.6  |
| 5.03 | 19/02/2013 | 100.8 |
| 5.04 | 19/02/2013 | 102.2 |
| 5.12 | 19/02/2013 | 96.9  |
| 4.87 | 19/02/2013 | 104.6 |
| 5.07 | 19/02/2013 | 101.0 |
| 4.95 | 19/02/2013 | 103.8 |
| 4.99 | 19/02/2013 | 100.5 |
| 5.11 | 19/02/2013 | 103.3 |
| 5.05 | 19/02/2013 | 99.2  |
| 5.05 | 19/02/2013 | 107.9 |
| 4.69 | 19/02/2013 | 110.1 |
| 4.07 | 19/02/2013 | 100.6 |
| 4.07 | 19/02/2013 | 101.3 |
| 3.61 | 19/02/2013 | 109.6 |
| 3.80 | 19/02/2013 | 100.5 |
| 3.85 | 19/02/2013 | 106.2 |
| 3.84 | 19/02/2013 | 105.6 |
| 3.38 | 19/02/2013 | 102.4 |
| 3.21 | 19/02/2013 | 87.3  |
| 4.56 | 19/02/2013 | 103.8 |
| 5.52 | 19/02/2013 | 98.5  |
| 4.75 | 19/02/2013 | 96.7  |
| 4.94 | 20/02/2013 | 91.7  |
| 4.96 | 20/02/2013 | 99.7  |
| 4.94 | 20/02/2013 | 99.7  |
| 4.98 | 20/02/2013 | 106.9 |
| 4.96 | 20/02/2013 | 94.4  |
| 4.85 | 20/02/2013 | 89.6  |
| 4.99 | 20/02/2013 | 94.0  |
| 4.93 | 20/02/2013 | 96.9  |
| 4.90 | 20/02/2013 | 98.1  |
| 4.98 | 20/02/2013 | 94.7  |
| 4.93 | 20/02/2013 | 0.1   |
| 4.89 | 20/02/2013 | 102.5 |
| 4.90 | 20/02/2013 | 97.0  |
| 4.85 | 20/02/2013 | 95.1  |
| 4.97 | 20/02/2013 | 107.5 |
| 4.94 | 20/02/2013 | 99.3  |
| 4.99 | 20/02/2013 | 105.4 |
| 4.91 | 20/02/2013 | 98.5  |
| 4.99 | 20/02/2013 | 97.1  |
| 4.92 | 20/02/2013 | 98.2  |
| 4.94 | 20/02/2013 | 94.8  |
| 4.95 | 20/02/2013 | 92.5  |
| 4.93 | 20/02/2013 | 102.4 |

|      |       |            |              |
|------|-------|------------|--------------|
| 6.22 |       | 20/02/2013 | <b>109.3</b> |
| 6.26 |       | 20/02/2013 | <b>100.2</b> |
| 6.21 |       | 20/02/2013 | <b>107.5</b> |
| 6.21 |       | 20/02/2013 | <b>111.8</b> |
| 6.13 |       | 20/02/2013 | <b>98.7</b>  |
| 6.24 |       | 20/02/2013 | <b>107.2</b> |
| 6.11 |       | 20/02/2013 | <b>102.2</b> |
| 6.19 |       | 20/02/2013 | <b>100.6</b> |
| 6.22 |       | 20/02/2013 | <b>106.4</b> |
| 6.26 |       | 20/02/2013 | <b>103.6</b> |
| 6.13 |       | 20/02/2013 | <b>101.6</b> |
| 6.25 |       | 20/02/2013 | <b>105.4</b> |
| 6.19 |       | 20/02/2013 | <b>102.3</b> |
| 6.08 |       | 20/02/2013 | <b>99.7</b>  |
| 6.27 |       | 20/02/2013 | <b>103.9</b> |
| 6.17 |       | 20/02/2013 | <b>106.7</b> |
| 6.24 |       | 20/02/2013 | <b>109.5</b> |
| 6.06 |       | 20/02/2013 | <b>96.9</b>  |
| 6.24 |       | 20/02/2013 | <b>108.9</b> |
| 6.15 |       | 20/02/2013 | <b>111.0</b> |
| 6.04 |       | 20/02/2013 | <b>100.4</b> |
| 6.19 |       | 20/02/2013 | <b>100.4</b> |
| 6.29 |       | 20/02/2013 | <b>105.4</b> |
| 5.90 |       | 20/02/2013 | <b>86.0</b>  |
| 6.39 |       | 20/02/2013 | <b>91.4</b>  |
| 6.34 |       | 20/02/2013 | <b>112.3</b> |
| 5.46 |       | 20/02/2013 | <b>104.3</b> |
| 5.69 |       | 20/02/2013 | <b>85.0</b>  |
| 5.53 |       | 20/02/2013 | <b>98.1</b>  |
| 5.59 | 16.29 | 20/02/2013 | <b>103.6</b> |
| 6.19 | 16.33 | 20/02/2013 | <b>110.4</b> |
| 5.78 | 16.31 | 20/02/2013 | <b>107.7</b> |
| 5.75 |       | 22/02/2013 | <b>95.8</b>  |
| 6.80 |       | 22/02/2013 | <b>108.5</b> |
| 6.45 |       | 22/02/2013 | <b>111.1</b> |
|      |       | 22/02/2013 | <b>112.4</b> |
| 4.67 |       | 22/02/2013 | <b>46.3</b>  |
| 4.46 |       | 22/02/2013 | <b>53.8</b>  |
|      |       | 22/02/2013 | <b>40.0</b>  |
|      |       | 22/02/2013 | <b>49.4</b>  |
| 6.39 |       | 22/02/2013 | <b>110.0</b> |
| 6.49 |       | 22/02/2013 | <b>111.0</b> |
|      |       | 22/02/2013 | <b>100.0</b> |
|      |       | 22/02/2013 | <b>92.5</b>  |
|      |       | 22/02/2013 | <b>90.5</b>  |
|      |       | 22/02/2013 | <b>92.5</b>  |
|      |       | 22/02/2013 | <b>95.0</b>  |
| 6.21 |       | 22/02/2013 | <b>91.5</b>  |
| 4.29 |       | 22/02/2013 | <b>96.2</b>  |
|      |       | 22/02/2013 | <b>95.8</b>  |

|      |       |            |              |
|------|-------|------------|--------------|
| 4.22 |       | 22/02/2013 | <b>92.3</b>  |
|      |       | 22/02/2013 | <b>93.0</b>  |
|      |       | 22/02/2013 | <b>93.1</b>  |
|      |       | 22/02/2013 | <b>92.6</b>  |
|      |       | 22/02/2013 | <b>93.6</b>  |
|      |       | 22/02/2013 | <b>90.1</b>  |
|      |       | 22/02/2013 | <b>90.1</b>  |
|      |       | 22/02/2013 | <b>88.5</b>  |
|      |       | 22/02/2013 | <b>89.3</b>  |
|      |       | 22/02/2013 | <b>92.5</b>  |
| 6.09 |       | 22/02/2013 | <b>89.5</b>  |
| 6.01 |       | 22/02/2013 | <b>88.9</b>  |
|      |       | 22/02/2013 | <b>95.5</b>  |
|      |       | 22/02/2013 | <b>103.1</b> |
|      |       | 22/02/2013 | <b>109.6</b> |
|      |       | 22/02/2013 | <b>99.3</b>  |
|      |       | 22/02/2013 | <b>87.7</b>  |
|      |       | 22/02/2013 | <b>86.6</b>  |
|      |       | 22/02/2013 | <b>89.7</b>  |
|      |       | 22/02/2013 | <b>102.8</b> |
|      |       | 22/02/2013 | <b>90.9</b>  |
|      |       | 22/02/2013 | <b>89.5</b>  |
|      |       | 22/02/2013 | <b>96.7</b>  |
|      |       | 22/02/2013 | <b>89.5</b>  |
|      |       | 22/02/2013 | <b>85.8</b>  |
|      |       | 22/02/2013 | <b>89.8</b>  |
|      |       | 22/02/2013 | <b>98.0</b>  |
| 5.89 |       | 22/02/2013 | <b>104.0</b> |
| 5.98 |       | 22/02/2013 | <b>89.6</b>  |
|      |       | 22/02/2013 | <b>87.6</b>  |
|      |       | 22/02/2013 | <b>95.6</b>  |
|      |       | 22/02/2013 | <b>102.1</b> |
|      |       | 22/02/2013 | <b>92.7</b>  |
|      |       | 22/02/2013 | <b>89.8</b>  |
|      |       | 22/02/2013 | <b>87.1</b>  |
|      |       | 22/02/2013 | <b>103.8</b> |
|      |       | 22/02/2013 | <b>93.7</b>  |
| 6.89 | 19.76 | 22/02/2013 | <b>88.3</b>  |
| 5.25 |       | 25/02/2013 | <b>92.8</b>  |
| 5.22 |       | 25/02/2013 | <b>91.8</b>  |
| 6.08 |       | 25/02/2013 | <b>107.7</b> |
| 6.32 |       | 25/02/2013 | <b>101.2</b> |
|      |       | 25/02/2013 | <b>94.4</b>  |
|      |       | 25/02/2013 | <b>91.6</b>  |
| 6.09 |       | 25/02/2013 | <b>99.4</b>  |
| 5.97 |       | 25/02/2013 | <b>102.7</b> |
|      |       | 25/02/2013 | <b>101.1</b> |
|      |       | 25/02/2013 | <b>103.7</b> |
|      |       | 25/02/2013 | <b>95.2</b>  |
|      |       | 25/02/2013 | <b>108.5</b> |

|      |       |            |       |
|------|-------|------------|-------|
|      |       | 25/02/2013 | 99.4  |
|      |       | 25/02/2013 | 85.1  |
|      |       | 25/02/2013 | 99.0  |
|      |       | 25/02/2013 | 97.3  |
|      |       | 25/02/2013 | 104.3 |
| 5.96 |       | 25/02/2013 | 96.1  |
| 5.93 |       | 25/02/2013 | 108.0 |
| 6.04 |       | 25/02/2013 | 100.9 |
| 6.10 |       | 25/02/2013 | 102.5 |
|      |       | 25/02/2013 | 101.6 |
|      |       | 25/02/2013 | 102.2 |
|      |       | 25/02/2013 | 89.5  |
|      |       | 25/02/2013 | 90.0  |
|      |       | 25/02/2013 | 103.9 |
|      |       | 25/02/2013 | 103.3 |
|      |       | 25/02/2013 | 106.6 |
|      |       | 25/02/2013 | 96.0  |
|      |       | 25/02/2013 | 106.8 |
|      |       | 25/02/2013 | 103.8 |
|      |       | 25/02/2013 | 103.8 |
|      |       | 25/02/2013 | 102.3 |
|      |       | 25/02/2013 | 106.0 |
|      |       | 25/02/2013 | 106.9 |
|      |       | 25/02/2013 | 93.9  |
|      |       | 25/02/2013 | 107.8 |
|      |       | 25/02/2013 | 105.1 |
|      |       | 25/02/2013 | 106.0 |
|      |       | 25/02/2013 | 106.3 |
| 5.73 | 16.15 | 25/02/2013 | 89.2  |
| 6.16 |       | 25/02/2013 | 99.2  |
| 6.35 |       | 25/02/2013 | 110.0 |
|      |       | 25/02/2013 | 101.0 |
|      |       | 25/02/2013 | 100.9 |
|      |       | 25/02/2013 | 104.8 |
|      |       | 25/02/2013 | 104.3 |
| 7.23 | 17.40 | 25/02/2013 | 105.7 |
|      |       | 25/02/2013 | 95.8  |
| 7.10 | 17.50 | 25/02/2013 | 104.4 |
|      |       | 25/02/2013 | 100.0 |
|      |       | 25/02/2013 | 106.2 |
|      |       | 25/02/2013 | 103.8 |
|      |       | 25/02/2013 | 104.1 |
|      |       | 25/02/2013 | 106.8 |
|      |       | 25/02/2013 | 99.5  |
|      |       | 25/02/2013 | 102.7 |
|      |       | 25/02/2013 | 113.5 |
|      |       | 25/02/2013 | 105.9 |
|      |       | 25/02/2013 | 99.0  |
|      |       | 25/02/2013 | 106.4 |
|      |       | 25/02/2013 | 102.8 |

|            |                |
|------------|----------------|
| 25/02/2013 | 104.0          |
| 25/02/2013 | 101.7          |
| 27/02/2013 | 110.0          |
| 27/02/2013 | 108.7          |
| 27/02/2013 | 107.1          |
| 27/02/2013 | 107.1          |
| 27/02/2013 | 105.3          |
| 27/02/2013 | 104.5          |
| 27/02/2013 | 100.4          |
| 27/02/2013 | 106.9          |
| 27/02/2013 | 107.1          |
| 27/02/2013 | 106.1          |
| 27/02/2013 | Not detectable |
| 27/02/2013 | 106.9          |
| 27/02/2013 | 108.9          |
| 27/02/2013 | 107.9          |
| 27/02/2013 | 112.6          |
| 27/02/2013 | 108.9          |
| 27/02/2013 | 104.9          |
| 27/02/2013 | 95.4           |
| 27/02/2013 | 109.8          |
| 27/02/2013 | 107.5          |
| 27/02/2013 | 108.7          |
| 27/02/2013 | 110.0          |
| 27/02/2013 | 110.0          |
| 27/02/2013 | 111.1          |
| 27/02/2013 | 100.7          |
| 27/02/2013 | 111.1          |
| 27/02/2013 | 109.6          |
| 27/02/2013 | 106.9          |
| 27/02/2013 | 109.9          |
| 27/02/2013 | 111.4          |
| 27/02/2013 | 113.4          |
| 27/02/2013 | 102.3          |
| 27/02/2013 | 113.6          |
| 27/02/2013 | 110.9          |
| 27/02/2013 | 110.7          |
| 27/02/2013 | 108.0          |
| 27/02/2013 | 111.0          |
| 27/02/2013 | 112.3          |
| 27/02/2013 | 110.8          |
| 27/02/2013 | 113.8          |
| 27/02/2013 | 109.7          |
| 27/02/2013 | Not detectable |
| 27/02/2013 | 103.8          |
| 27/02/2013 | 110.2          |
| 27/02/2013 | 105.0          |
| 27/02/2013 | 111.6          |
| 27/02/2013 | 105.9          |
| 28/02/2013 | 101.3          |

6.28  
6.47



|            |       |
|------------|-------|
| 28/02/2013 | 102.2 |
| 28/02/2013 | 96.7  |
| 28/02/2013 | 104.4 |
| 28/02/2013 | 98.5  |
| 28/02/2013 | 106.5 |
| 28/02/2013 | 93.5  |
| 28/02/2013 | 106.3 |
| 28/02/2013 | 107.6 |
| 28/02/2013 | 107.7 |
| 28/02/2013 | 97.8  |
| 28/02/2013 | 107.8 |
| 28/02/2013 | 108.4 |
| 28/02/2013 | 107.2 |
| 28/02/2013 | 102.6 |
| 28/02/2013 | 104.2 |
| 28/02/2013 | 112.4 |
| 28/02/2013 | 110.3 |
| 28/02/2013 | 86.3  |
| 28/02/2013 | 107.9 |
| 28/02/2013 | 108.9 |
| 28/02/2013 | 109.5 |
| 28/02/2013 | 110.0 |
| 28/02/2013 | 114.9 |
| 28/02/2013 | 111.2 |
| 28/02/2013 | 108.6 |
| 28/02/2013 | 111.9 |
| 28/02/2013 | 112.6 |
| 28/02/2013 | 110.4 |
| 28/02/2013 | 102.5 |
| 28/02/2013 | 109.9 |
| 28/02/2013 | 96.1  |
| 28/02/2013 | 110.7 |
| 28/02/2013 | 109.5 |
| 28/02/2013 | 108.3 |
| 28/02/2013 | 109.3 |
| 28/02/2013 | 109.8 |
| 28/02/2013 | 110.0 |
| 28/02/2013 | 107.8 |
| 28/02/2013 | 112.1 |
| 28/02/2013 | 112.5 |
| 28/02/2013 | 110.0 |
| 28/02/2013 | 104.6 |
| 28/02/2013 | 109.6 |
| 28/02/2013 | 111.4 |
| 28/02/2013 | 90.6  |
| 28/02/2013 | 113.6 |
| 28/02/2013 | 114.6 |
| 28/02/2013 | 110.8 |
| 28/02/2013 | 112.1 |
| 28/02/2013 | 111.2 |

|      |       |            |                       |
|------|-------|------------|-----------------------|
|      |       | 28/02/2013 | 111.7                 |
|      |       | 28/02/2013 | 112.0                 |
|      |       | 28/02/2013 | 113.0                 |
|      |       | 28/02/2013 | 111.6                 |
|      |       | 28/02/2013 | <b>Not detectable</b> |
|      |       | 28/02/2013 | 97.0                  |
|      |       | 28/02/2013 | 105.6                 |
|      |       | 28/02/2013 | 110.1                 |
|      |       | 28/02/2013 | 109.8                 |
|      |       | 28/02/2013 | 95.6                  |
|      |       | 28/02/2013 | 105.2                 |
|      |       | 28/02/2013 | 110.0                 |
|      |       | 28/02/2013 | 113.8                 |
|      |       | 28/02/2013 | 106.0                 |
|      |       | 28/02/2013 | 95.9                  |
|      |       | 28/02/2013 | 106.3                 |
|      |       | 28/02/2013 | 114.9                 |
|      |       | 28/02/2013 | 90.3                  |
| 6.29 |       | 25/02/2013 | 96.5                  |
| 5.97 |       | 25/02/2013 | 108.4                 |
|      |       | 25/02/2013 | 100.3                 |
|      |       | 25/02/2013 | 98.0                  |
|      |       | 25/02/2013 | 106.0                 |
|      |       | 25/02/2013 | 107.4                 |
| 5.86 | 18.07 | 26/02/2013 | 107.5                 |
| 6.06 | 18.04 | 26/02/2013 | 108.8                 |
|      |       | 26/02/2013 | 104.4                 |
|      |       | 26/02/2013 | 103.1                 |
|      |       | 26/02/2013 | 106.6                 |
|      |       | 26/02/2013 | 103.0                 |
|      |       | 26/02/2013 | 103.0                 |
|      |       | 26/02/2013 | 109.7                 |
|      |       | 26/02/2013 | 102.8                 |
|      |       | 26/02/2013 | 112.4                 |
|      |       | 26/02/2013 | 106.2                 |
|      |       | 26/02/2013 | 104.7                 |
|      |       | 26/02/2013 | 110.7                 |
|      |       | 26/02/2013 | 92.2                  |
|      |       | 26/02/2013 | 106.2                 |
|      |       | 26/02/2013 | 112.2                 |
|      |       | 26/02/2013 | 92.9                  |
|      |       | 26/02/2013 | 93.6                  |
|      |       | 26/02/2013 | 97.0                  |
| 5.64 | 18.99 | 26/02/2013 | 93.1                  |
| 5.64 |       | 26/02/2013 | 94.9                  |
| 5.67 |       | 26/02/2013 | 98.2                  |
|      |       | 26/02/2013 | 86.6                  |
|      |       | 26/02/2013 | 92.3                  |
| 6.08 |       | 26/02/2013 | 94.6                  |
| 6.18 |       | 26/02/2013 | 85.5                  |

|        |       |            |       |
|--------|-------|------------|-------|
|        |       | 26/02/2013 | 95.3  |
|        |       | 26/02/2013 | 92.5  |
| 6.14   |       | 26/02/2013 | 96.2  |
| 5.95   |       | 26/02/2013 | 107.6 |
|        |       | 26/02/2013 | 96.0  |
|        |       | 26/02/2013 | 93.2  |
|        |       | 26/02/2013 | 98.8  |
|        |       | 26/02/2013 | 108.8 |
|        |       | 26/02/2013 | 89.9  |
|        |       | 26/02/2013 | 113.9 |
|        |       | 26/02/2013 | 0.1   |
|        |       | 26/02/2013 | 105.2 |
|        |       | 26/02/2013 | 110.4 |
|        |       | 26/02/2013 | 107.2 |
|        |       | 26/02/2013 | 94.7  |
|        |       | 26/02/2013 | 114.9 |
|        |       | 26/02/2013 | 94.5  |
|        |       | 26/02/2013 | 97.7  |
|        |       | 26/02/2013 | 91.2  |
|        |       | 26/02/2013 | 96.0  |
|        |       | 26/02/2013 | 99.4  |
|        |       | 26/02/2013 | 93.7  |
|        |       | 26/02/2013 | 95.5  |
| 5.94   |       | 26/02/2013 | 102.1 |
| 6.04   |       | 26/02/2013 | 101.2 |
|        |       | 26/02/2013 | 104.8 |
|        |       | 26/02/2013 | 102.9 |
|        |       | 26/02/2013 | 109.1 |
|        |       | 26/02/2013 | 99.7  |
|        |       | 26/02/2013 | 105.1 |
|        |       | 26/02/2013 | 105.7 |
|        |       | 26/02/2013 | 107.6 |
|        |       | 26/02/2013 | 98.4  |
|        |       | 26/02/2013 | 113.2 |
|        |       | 26/02/2013 | 105.8 |
| 6.2300 |       | 26/02/2013 | 100.0 |
| 6.21   |       | 26/02/2013 | 108.6 |
|        |       | 26/02/2013 | 101.4 |
|        |       | 26/02/2013 | 95.8  |
|        |       | 26/02/2013 | 107.1 |
|        |       | 26/02/2013 | 104.2 |
|        |       | 26/02/2013 | 109.5 |
|        |       | 26/02/2013 | 106.3 |
|        |       | 26/02/2013 | 110.1 |
|        |       | 26/02/2013 | 107.7 |
|        |       | 26/02/2013 | 102.4 |
|        |       | 26/02/2013 | 97.4  |
|        |       | 26/02/2013 | 108.9 |
|        |       | 26/02/2013 | 107.0 |
| 5.93   | 19.08 | 26/02/2013 | 104.8 |

|      |       |            |                |
|------|-------|------------|----------------|
| 5.85 | 19.17 | 26/02/2013 | 104.6          |
|      |       | 26/02/2013 | 108.4          |
|      |       | 26/02/2013 | 101.1          |
|      |       | 26/02/2013 | 111.6          |
|      |       | 26/02/2013 | 108.0          |
|      |       | 26/02/2013 | 101.9          |
|      |       | 26/02/2013 | 105.0          |
|      |       | 26/02/2013 | 102.4          |
|      |       | 26/02/2013 | 111.8          |
|      |       | 26/02/2013 | 102.4          |
|      |       | 26/02/2013 | 105.3          |
|      |       | 26/02/2013 | 107.2          |
|      |       | 26/02/2013 | 103.3          |
| 4.38 |       | 23/05/2013 | 96.4           |
| 4.29 |       | 23/05/2013 | 90.2           |
| 2.91 |       | 23/05/2013 | 97.0           |
| 2.97 |       | 23/05/2013 | 96.4           |
| 3.11 |       | 23/05/2013 | 97.0           |
| 2.91 |       | 23/05/2013 | 97.5           |
| 3.12 |       | 23/05/2013 | 103.2          |
|      |       | 23/05/2013 | 99.4           |
|      |       | 23/05/2013 | 98.9           |
|      |       | 23/05/2013 | Not detectable |
|      |       | 23/05/2013 | 99.0           |
|      |       | 23/05/2013 | 101.4          |
|      |       | 23/05/2013 | 97.3           |
|      |       | 23/05/2013 | 100.9          |
|      |       | 23/05/2013 | 104.1          |
|      |       | 23/05/2013 | 99.5           |
|      |       | 23/05/2013 | 100.1          |
|      |       | 23/05/2013 | 100.1          |
|      |       | 23/05/2013 | Not detectable |
|      |       | 23/05/2013 | 102.0          |
|      |       | 23/05/2013 | 102.3          |
|      |       | 23/05/2013 | 106.5          |
|      |       | 23/05/2013 | 101.2          |
|      |       | 23/05/2013 | 99.4           |
|      |       | 23/05/2013 | 101.4          |
|      |       | 23/05/2013 | 97.6           |
|      |       | 23/05/2013 | 104.2          |
|      |       | 24/05/2013 | 108.1          |
|      |       | 24/05/2013 | 107.8          |
|      |       | 24/05/2013 | 107.9          |
|      |       | 24/05/2013 | 89.7           |
|      |       | 24/05/2013 | 90.3           |
|      |       | 24/05/2013 | 94.0           |
|      |       | 24/05/2013 | 101.1          |
|      |       | 24/05/2013 | 96.3           |
|      |       | 24/05/2013 | 97.1           |
|      |       | 24/05/2013 | 93.0           |

|      |            |                |
|------|------------|----------------|
|      | 24/05/2013 | 100.0          |
|      | 24/05/2013 | Not detectable |
|      | 24/05/2013 | 100.9          |
|      | 24/05/2013 | 99.6           |
|      | 24/05/2013 | 99.1           |
|      | 24/05/2013 | 101.6          |
|      | 24/05/2013 | 98.6           |
|      | 24/05/2013 | 98.6           |
|      | 24/05/2013 | 99.3           |
|      | 24/05/2013 | 99.0           |
|      | 24/05/2013 | 99.5           |
|      | 24/05/2013 | 103.5          |
|      | 24/05/2013 | 98.0           |
|      | 24/05/2013 | 99.3           |
|      | 24/05/2013 | 103.6          |
|      | 24/05/2013 | 104.1          |
|      | 24/05/2013 | 96.3           |
|      | 24/05/2013 | 99.9           |
|      | 24/05/2013 | 100.4          |
|      | 24/05/2013 | 102.8          |
|      | 24/05/2013 | 101.7          |
|      | 24/05/2013 | 104.3          |
|      | 24/05/2013 | 103.2          |
|      | 24/05/2013 | 101.6          |
|      | 24/05/2013 | 100.7          |
|      | 24/05/2013 | 101.5          |
|      | 24/05/2013 | 101.8          |
|      | 24/05/2013 | 100.3          |
|      | 24/05/2013 | 96.5           |
|      | 24/05/2013 | 100.7          |
|      | 24/05/2013 | 102.9          |
|      | 24/05/2013 | 99.3           |
|      | 24/05/2013 | 84.6           |
|      | 24/05/2013 | 103.8          |
|      | 24/05/2013 | 101.8          |
|      | 24/05/2013 | 102.8          |
|      | 24/05/2013 | 85.7           |
|      | 24/05/2013 | 101.0          |
|      | 24/05/2013 | 101.1          |
|      | 24/05/2013 | 98.8           |
|      | 24/05/2013 | 99.6           |
|      | 24/05/2013 | 102.0          |
| 4.76 | 24/05/2013 | 80.0           |
| 4.45 | 24/05/2013 | 95.2           |
| 4.87 | 24/05/2013 | 98.0           |
| 4.51 | 24/05/2013 | 97.1           |
| 4.68 | 24/05/2013 | 94.5           |
| 4.42 | 24/05/2013 | 100.1          |
| 4.34 | 24/05/2013 | 98.8           |
| 4.33 | 24/05/2013 | 98.2           |

|      |            |       |
|------|------------|-------|
| 4.24 | 24/05/2013 | 98.5  |
| 4.38 | 24/05/2013 | 100.2 |
| 3.92 | 24/05/2013 | 102.2 |
| 4.03 | 24/05/2013 | 101.2 |
| 4.18 | 24/05/2013 | 90.5  |
| 2.77 | 03/06/2013 | 99.3  |
| 2.79 | 03/06/2013 | 100.6 |
| 3.42 | 03/06/2013 | 100.1 |
| 3.53 | 03/06/2013 | 100.1 |
| 3.51 | 03/06/2013 | 103.6 |
| 3.47 | 03/06/2013 | 101.1 |
| 3.55 | 03/06/2013 | 105.7 |
|      | 03/06/2013 | 99.3  |
|      | 03/06/2013 | 102.0 |
|      | 03/06/2013 | 107.5 |
|      | 03/06/2013 | 100.3 |
|      | 03/06/2013 | 101.1 |
|      | 03/06/2013 | 103.0 |
|      | 03/06/2013 | 101.6 |
|      | 03/06/2013 | 103.7 |
|      | 03/06/2013 | 104.8 |
|      | 03/06/2013 | 105.3 |
|      | 03/06/2013 | 103.5 |
|      | 03/06/2013 | 105.4 |
|      | 03/06/2013 | 104.6 |
|      | 03/06/2013 | 102.0 |
|      | 03/06/2013 | 105.8 |
|      | 03/06/2013 | 106.6 |
|      | 03/06/2013 | 106.2 |
|      | 03/06/2013 | 106.4 |
|      | 03/06/2013 | 106.6 |
| 4.41 | 29/05/2013 | 94.8  |
| 4.48 | 29/05/2013 | 92.3  |
| 3.38 | 29/05/2013 | 101.0 |
| 3.35 | 29/05/2013 | 97.7  |
| 3.42 | 29/05/2013 | 97.9  |
| 3.37 | 29/05/2013 | 104.0 |
| 3.38 | 29/05/2013 | 99.1  |
|      | 29/05/2013 | 109.1 |
|      | 29/05/2013 | 101.5 |
|      | 29/05/2013 | 103.8 |
|      | 29/05/2013 | 102.0 |
|      | 29/05/2013 | 107.4 |
|      | 29/05/2013 | 108.0 |
|      | 29/05/2013 | 108.0 |
|      | 29/05/2013 | 98.0  |
|      | 29/05/2013 | 104.7 |
| 3.47 | 29/05/2013 | 105.3 |
| 3.36 | 29/05/2013 | 106.0 |
| 3.26 | 29/05/2013 | 105.9 |

|      |            |       |
|------|------------|-------|
| 3.42 | 29/05/2013 | 107.3 |
| 3.38 | 29/05/2013 | 107.7 |
| 3.40 | 29/05/2013 | 107.8 |
| 3.36 | 29/05/2013 | 105.1 |
|      | 29/05/2013 | 107.1 |
|      | 29/05/2013 | 105.5 |
|      | 29/05/2013 | 106.4 |
|      | 29/05/2013 | 111.4 |
|      | 29/05/2013 | 111.3 |
|      | 29/05/2013 | 109.6 |
|      | 29/05/2013 | 109.0 |
| 3.66 | 04/06/2013 | 70.4  |
| 4.80 | 04/06/2013 | 76.8  |
| 4.88 | 04/06/2013 | 72.0  |
| 3.38 | 29/05/2013 | 105.7 |
| 2.77 | 29/05/2013 | 105.0 |
| 2.87 | 29/05/2013 | 108.4 |
| 2.91 | 29/05/2013 | 107.6 |
| 4.33 | 29/05/2013 | 108.1 |
| 4.20 | 29/05/2013 | 103.3 |
| 4.32 | 29/05/2013 | 106.4 |
| 4.40 | 29/05/2013 | 111.4 |
| 4.36 | 29/05/2013 | 107.4 |
| 4.19 | 03/06/2013 | 103.7 |
| 4.24 | 03/06/2013 | 103.1 |
| 4.28 | 03/06/2013 | 103.4 |
| 4.28 | 03/06/2013 | 105.3 |
| 4.26 | 03/06/2013 | 105.0 |
|      | 03/06/2013 | 106.1 |
|      | 03/06/2013 | 100.5 |
|      | 03/06/2013 | 104.8 |
|      | 03/06/2013 | 105.7 |
|      | 03/06/2013 | 107.4 |
|      | 03/06/2013 | 102.0 |
|      | 03/06/2013 | 104.6 |
|      | 03/06/2013 | 104.9 |
|      | 03/06/2013 | 104.1 |
|      | 03/06/2013 | 100.9 |
|      | 03/06/2013 | 104.1 |
|      | 03/06/2013 | 103.0 |
|      | 03/06/2013 | 105.2 |
| 4.25 | 04/06/2013 | 105.0 |
| 4.26 | 04/06/2013 | 104.3 |
| 4.23 | 04/06/2013 | 101.5 |
| 4.22 | 04/06/2013 | 102.9 |
| 4.28 | 04/06/2013 | 101.4 |
|      | 04/06/2013 | 103.1 |
|      | 04/06/2013 | 100.8 |
|      | 04/06/2013 | 104.3 |
|      | 04/06/2013 | 104.1 |

|      |            |       |
|------|------------|-------|
|      | 04/06/2013 | 102.8 |
|      | 04/06/2013 | 104.2 |
|      | 04/06/2013 | 99.5  |
|      | 04/06/2013 | 105.9 |
|      | 04/06/2013 | 103.2 |
|      | 04/06/2013 | 104.4 |
|      | 04/06/2013 | 105.5 |
|      | 04/06/2013 | 106.1 |
|      | 04/06/2013 | 108.3 |
|      | 04/06/2013 | 103.3 |
|      | 04/06/2013 | 105.8 |
|      | 04/06/2013 | 106.2 |
|      | 04/06/2013 | 104.6 |
|      | 04/06/2013 | 105.7 |
|      | 04/06/2013 | 103.3 |
|      | 04/06/2013 | 103.9 |
|      | 04/06/2013 | 104.6 |
|      | 04/06/2013 | 107.0 |
|      | 04/06/2013 | 104.7 |
|      | 04/06/2013 | 107.0 |
|      | 04/06/2013 | 105.7 |
|      | 04/06/2013 | 107.1 |
|      | 04/06/2013 | 107.9 |
|      | 04/06/2013 | 105.5 |
|      | 04/06/2013 | 103.3 |
|      | 04/06/2013 | 105.5 |
|      | 04/06/2013 | 104.4 |
|      | 04/06/2013 | 102.0 |
|      | 04/06/2013 | 102.9 |
|      | 04/06/2013 | 105.6 |
|      | 04/06/2013 | 106.5 |
|      | 04/06/2013 | 99.4  |
|      | 04/06/2013 | 106.2 |
|      | 04/06/2013 | 107.1 |
|      | 04/06/2013 | 103.4 |
|      | 04/06/2013 | 105.8 |
|      | 04/06/2013 | 103.8 |
|      | 04/06/2013 | 100.7 |
|      | 04/06/2013 | 100.7 |
| 4.17 | 29/05/2013 | 102.9 |
| 4.23 | 29/05/2013 | 103.3 |
| 4.20 | 29/05/2013 | 107.0 |
| 4.10 | 29/05/2013 | 105.5 |
| 4.29 | 29/05/2013 | 108.1 |
| 4.44 | 29/05/2013 | 92.2  |
| 4.07 | 29/05/2013 | 101.3 |
| 4.34 | 30/05/2013 | 102.2 |
| 4.55 | 30/05/2013 | 102.2 |
| 4.41 | 30/05/2013 | 92.5  |
| 4.52 | 30/05/2013 | 102.3 |



|      |            |              |
|------|------------|--------------|
| 4.61 | 30/05/2013 | <b>100.3</b> |
|      | 30/05/2013 | <b>102.1</b> |
|      | 30/05/2013 | <b>93.8</b>  |
|      | 30/05/2013 | <b>102.2</b> |
|      | 30/05/2013 | <b>100.5</b> |
|      | 30/05/2013 | <b>97.2</b>  |
|      | 30/05/2013 | <b>98.9</b>  |
|      | 30/05/2013 | <b>96.0</b>  |
|      | 30/05/2013 | <b>100.6</b> |
|      | 30/05/2013 | <b>101.1</b> |
|      | 30/05/2013 | <b>100.7</b> |
|      | 30/05/2013 | <b>101.8</b> |
|      | 30/05/2013 | <b>104.0</b> |
|      | 30/05/2013 | <b>104.1</b> |
|      | 30/05/2013 | <b>102.1</b> |
|      | 30/05/2013 | <b>100.0</b> |
|      | 30/05/2013 | <b>102.6</b> |
|      | 30/05/2013 | <b>100.9</b> |
|      | 30/05/2013 | <b>103.2</b> |
|      | 30/05/2013 | <b>93.9</b>  |
|      | 30/05/2013 | <b>98.6</b>  |
| 4.52 | 30/05/2013 | <b>100.1</b> |
| 4.38 | 30/05/2013 | <b>96.7</b>  |
| 4.45 | 30/05/2013 | <b>101.7</b> |
| 4.47 | 30/05/2013 | <b>101.9</b> |
| 4.51 | 30/05/2013 | <b>102.2</b> |
|      | 30/05/2013 | <b>104.8</b> |
|      | 30/05/2013 | <b>103.7</b> |
|      | 30/05/2013 | <b>102.9</b> |
|      | 30/05/2013 | <b>102.6</b> |
|      | 30/05/2013 | <b>101.4</b> |
|      | 30/05/2013 | <b>102.0</b> |
|      | 30/05/2013 | <b>101.7</b> |
|      | 30/05/2013 | <b>102.9</b> |
|      | 30/05/2013 | <b>101.1</b> |
|      | 30/05/2013 | <b>102.9</b> |
|      | 30/05/2013 | <b>96.5</b>  |
|      | 30/05/2013 | <b>100.6</b> |
|      | 30/05/2013 | <b>104.2</b> |
|      | 30/05/2013 | <b>101.9</b> |
|      | 30/05/2013 | <b>106.1</b> |
|      | 30/05/2013 | <b>104.6</b> |
|      | 30/05/2013 | <b>103.9</b> |
| 3.95 | 05/06/2013 | <b>100.0</b> |
| 4.34 | 05/06/2013 | <b>86.7</b>  |
| 3.93 | 05/06/2013 | <b>102.0</b> |
| 4.07 | 05/06/2013 | <b>107.4</b> |
|      | 05/06/2013 | <b>81.5</b>  |
| 7.15 | 05/06/2013 | <b>105.3</b> |
| 7.17 | 05/06/2013 | <b>104.5</b> |

|      |            |       |
|------|------------|-------|
| 7.15 | 05/06/2013 | 108.7 |
|      | 05/06/2013 | 67.9  |
|      | 05/06/2013 | 85.6  |
|      | 05/06/2013 | 75.8  |
|      | 05/06/2013 | 77.2  |
|      | 05/06/2013 | 77.1  |
|      | 05/06/2013 | 82.3  |
|      | 05/06/2013 | 87.6  |
|      | 05/06/2013 | 81.3  |
|      | 05/06/2013 | 77.1  |
|      | 05/06/2013 | 84.2  |
|      | 05/06/2013 | 83.1  |
|      | 05/06/2013 | 82.3  |
|      | 05/06/2013 | 79.2  |
|      | 05/06/2013 | 113.1 |
|      | 05/06/2013 | 84.4  |
|      | 05/06/2013 | 92.6  |
|      | 05/06/2013 | 113.9 |
|      | 05/06/2013 | 111.9 |
|      | 05/06/2013 | 66.6  |
|      | 05/06/2013 | 82.8  |
|      | 05/06/2013 | 71.6  |
|      | 05/06/2013 | 112.5 |
|      | 05/06/2013 | 77.4  |
|      | 05/06/2013 | 89.0  |
|      | 05/06/2013 | 113.2 |
|      | 05/06/2013 | 86.4  |
|      | 05/06/2013 | 106.0 |
|      | 05/06/2013 | 82.1  |
|      | 05/06/2013 | 107.5 |
|      | 05/06/2013 | 74.3  |
|      | 05/06/2013 | 87.0  |
|      | 05/06/2013 | 108.5 |
|      | 05/06/2013 | 81.6  |
|      | 05/06/2013 | 84.8  |
|      | 05/06/2013 | 112.8 |
| 5.56 | 18/06/2013 | 95.4  |
| 5.59 | 18/06/2013 | 104.3 |
| 5.57 | 18/06/2013 | 105.5 |
| 5.58 | 18/06/2013 | 102.0 |
| 5.58 | 18/06/2013 | 102.9 |
|      | 18/06/2013 | 104.0 |
|      | 18/06/2013 | 106.5 |
|      | 18/06/2013 | 109.1 |
|      | 18/06/2013 | 106.8 |
| 8.12 | 18/06/2013 | 102.3 |
| 8.13 | 18/06/2013 | 98.2  |
| 8.13 | 18/06/2013 | 95.1  |
| 7.17 | 18/06/2013 | 102.1 |
| 7.16 | 18/06/2013 | 110.2 |

|      |            |       |
|------|------------|-------|
| 7.17 | 18/06/2013 | 104.5 |
| 7.18 | 18/06/2013 | 104.8 |
| 7.19 | 18/06/2013 | 106.0 |
|      | 18/06/2013 | 106.9 |
|      | 18/06/2013 | 107.2 |
|      | 18/06/2013 | 110.5 |
|      | 18/06/2013 | 109.9 |
|      | 18/06/2013 | 106.8 |
|      | 18/06/2013 | 109.7 |
|      | 18/06/2013 | 108.8 |
|      | 18/06/2013 | 106.8 |
|      | 18/06/2013 | 107.5 |
|      | 18/06/2013 | 109.3 |
|      | 18/06/2013 | 111.1 |
|      | 18/06/2013 | 108.3 |
|      | 18/06/2013 | 110.5 |
|      | 18/06/2013 | 109.5 |
|      | 18/06/2013 | 109.5 |
|      | 18/06/2013 | 108.6 |
|      | 18/06/2013 | 109.8 |
|      | 18/06/2013 | 109.1 |
|      | 18/06/2013 | 109.3 |
|      | 18/06/2013 | 109.8 |
|      | 18/06/2013 | 106.8 |
|      | 18/06/2013 | 109.1 |
|      | 18/06/2013 | 110.5 |
|      | 18/06/2013 | 109.4 |
|      | 18/06/2013 | 111.4 |
|      | 18/06/2013 | 111.5 |
|      | 18/06/2013 | 111.2 |
|      | 18/06/2013 | 105.9 |
|      | 18/06/2013 | 109.3 |
| 4.98 | 18/06/2013 | 102.8 |
| 2.93 | 18/06/2013 | 112.2 |
| 3.43 | 18/06/2013 | 99.6  |
| 3.79 | 18/06/2013 | 103.5 |
| 3.69 | 18/06/2013 | 102.8 |
| 3.77 | 18/06/2013 | 105.1 |
| 3.86 | 18/06/2013 | 100.5 |
| 3.88 | 18/06/2013 | 102.6 |
| 7.11 | 18/06/2013 | 111.2 |
| 7.14 | 18/06/2013 | 113.0 |
| 4.44 | 18/06/2013 | 98.8  |
|      | 18/06/2013 | 54.1  |
| 4.29 | 25/06/2013 | 93.5  |
| 4.18 | 25/06/2013 | 99.2  |
| 4.25 | 25/06/2013 | 96.4  |
| 4.15 | 25/06/2013 | 92.0  |
| 4.17 | 25/06/2013 | 102.2 |
|      | 25/06/2013 | 91.7  |

|       |            |                |
|-------|------------|----------------|
|       | 25/06/2013 | 88.9           |
|       | 25/06/2013 | 90.8           |
|       | 25/06/2013 | 91.9           |
|       | 27/03/2013 | 106.2          |
| 10.46 | 25/06/2013 | 97.1           |
| 10.46 | 25/06/2013 | 86.5           |
| 10.42 | 25/06/2013 | 85.7           |
| 10.42 | 25/06/2013 | 99.0           |
| 10.44 | 25/06/2013 | 93.6           |
|       | 25/06/2013 | 95.0           |
|       | 25/06/2013 | 96.3           |
|       | 25/06/2013 | 100.2          |
|       | 25/06/2013 | 92.6           |
|       | 25/06/2013 | 92.6           |
|       | 25/06/2013 | 89.1           |
|       | 25/06/2013 | 97.5           |
|       | 25/06/2013 | 98.7           |
|       | 25/06/2013 | 99.8           |
|       | 25/06/2013 | 95.7           |
|       | 25/06/2013 | 92.1           |
|       | 25/06/2013 | 90.5           |
|       | 25/06/2013 | 93.0           |
|       | 25/06/2013 | 88.8           |
| 3.76  | 09/04/2013 | 77.8           |
| 4.01  | 09/04/2013 | 80.8           |
| 3.88  | 09/04/2013 | 76.2           |
|       | 09/04/2013 | 76.7           |
|       | 09/04/2013 | 96.6           |
|       | 09/04/2013 | 85.2           |
|       | 09/04/2013 | 88.9           |
|       | 09/04/2013 | 75.7           |
|       | 09/04/2013 | 86.2           |
|       | 09/04/2013 | 80.7           |
| 3.80  | 09/04/2013 | 110.6          |
| 3.77  | 09/04/2013 | 78.0           |
| 3.83  | 09/04/2013 | 105.6          |
| 4.03  | 09/04/2013 | 88.0           |
| 4.08  | 09/04/2013 | 102.7          |
| 4.02  | 09/04/2013 | 102.0          |
| 3.55  | 26/03/2013 | 90.8           |
| 3.56  | 26/03/2013 | 92.0           |
| 3.45  | 26/03/2013 | 91.5           |
| 3.68  | 26/03/2013 | 92.3           |
| 3.51  | 26/03/2013 | 99.2           |
| 3.47  | 26/03/2013 | 98.8           |
| 4.00  | 26/03/2013 | Not detectable |
| 3.56  | 26/03/2013 | 88.7           |
| 3.58  | 26/03/2013 | 91.2           |
| 3.51  | 26/03/2013 | 97.6           |
|       | 26/03/2013 | 96.8           |

|            |                |
|------------|----------------|
| 26/03/2013 | 91.1           |
| 26/03/2013 | 94.8           |
| 26/03/2013 | 93.4           |
| 26/03/2013 | 96.5           |
| 26/03/2013 | 99.1           |
| 26/03/2013 | 94.6           |
| 26/03/2013 | 104.8          |
| 26/03/2013 | 105.5          |
| 26/03/2013 | 94.7           |
| 26/03/2013 | 88.6           |
| 26/03/2013 | 98.9           |
| 26/03/2013 | 99.1           |
| 26/03/2013 | 99.0           |
| 26/03/2013 | 99.9           |
| 26/03/2013 | 101.1          |
| 26/03/2013 | 99.2           |
| 26/03/2013 | 98.7           |
| 26/03/2013 | 97.6           |
| 26/03/2013 | 95.7           |
| 26/03/2013 | 98.8           |
| 26/03/2013 | 97.6           |
| 26/03/2013 | 105.8          |
| 26/03/2013 | 96.1           |
| 26/03/2013 | 103.3          |
| 26/03/2013 | 96.5           |
| 26/03/2013 | 93.5           |
| 26/03/2013 | 93.8           |
| 26/03/2013 | 92.4           |
| 26/03/2013 | 98.2           |
| 26/03/2013 | 101.4          |
| 26/03/2013 | 90.1           |
| 26/03/2013 | Not detectable |
| 26/03/2013 | 94.4           |
| 26/03/2013 | 98.7           |
| 26/03/2013 | 96.4           |
| 26/03/2013 | 97.6           |
| 26/03/2013 | 101.5          |
| 26/03/2013 | Not detectable |
| 26/03/2013 | 94.0           |
| 26/03/2013 | 97.2           |
| 26/03/2013 | 92.4           |
| 26/03/2013 | 99.9           |
| 26/03/2013 | 100.9          |
| 26/03/2013 | 108.2          |
| 26/03/2013 | 95.8           |
| 26/03/2013 | 100.9          |
| 26/03/2013 | Not detectable |
| 26/03/2013 | 101.5          |
| 26/03/2013 | 94.4           |
| 26/03/2013 | 101.0          |

|            |                |
|------------|----------------|
| 26/03/2013 | 92.4           |
| 26/03/2013 | 104.2          |
| 26/03/2013 | 102.0          |
| 26/03/2013 | 107.4          |
| 26/03/2013 | 103.0          |
| 26/03/2013 | Not detectable |
| 26/03/2013 | 101.0          |
| 26/03/2013 | 100.2          |
| 26/03/2013 | 103.1          |
| 26/03/2013 | 102.7          |
| 26/03/2013 | 112.2          |
| 27/03/2013 | Not detectable |
| 27/03/2013 | 99.7           |
| 27/03/2013 | 98.5           |
| 27/03/2013 | 91.6           |
| 27/03/2013 | 98.6           |
| 27/03/2013 | 97.8           |
| 27/03/2013 | 91.2           |
| 27/03/2013 | 97.1           |
| 27/03/2013 | 102.9          |
| 27/03/2013 | 100.1          |
| 27/03/2013 | 104.8          |
| 27/03/2013 | 98.9           |
| 27/03/2013 | 91.8           |
| 27/03/2013 | 99.5           |
| 27/03/2013 | 104.4          |
| 27/03/2013 | Not detectable |
| 27/03/2013 | 114.0          |
| 27/03/2013 | 98.1           |
| 27/03/2013 | 104.8          |
| 27/03/2013 | 108.8          |
| 27/03/2013 | 99.8           |
| 27/03/2013 | 101.2          |
| 27/03/2013 | 108.3          |
| 27/03/2013 | 108.6          |
| 27/03/2013 | 103.8          |
| 27/03/2013 | 106.7          |
| 27/03/2013 | 104.8          |
| 03/04/2013 | Not detectable |
| 03/04/2013 | 105.0          |
| 03/04/2013 | 99.8           |
| 03/04/2013 | 98.8           |
| 03/04/2013 | 107.6          |
| 03/04/2013 | 102.6          |
| 03/04/2013 | 106.4          |
| 03/04/2013 | 107.1          |
| 03/04/2013 | 109.5          |
| 03/04/2013 | 112.9          |
| 03/04/2013 | 110.8          |
| 03/04/2013 | 107.2          |

|      |            |                |
|------|------------|----------------|
|      | 03/04/2013 | 102.0          |
|      | 03/04/2013 | 99.5           |
|      | 03/04/2013 | 101.5          |
|      | 03/04/2013 | 91.2           |
|      | 03/04/2013 | Not detectable |
|      | 03/04/2013 | Not detectable |
|      | 03/04/2013 | Not detectable |
|      | 03/04/2013 | 106.8          |
|      | 03/04/2013 | 99.0           |
|      | 03/04/2013 | Not detectable |
|      | 03/04/2013 | 109.6          |
|      | 03/04/2013 | Not detectable |
|      | 03/04/2013 | 96.7           |
|      | 03/04/2013 | 114.7          |
|      | 03/04/2013 | 104.5          |
|      | 03/04/2013 | 97.8           |
|      | 03/04/2013 | 91.2           |
|      | 03/04/2013 | 98.1           |
|      | 03/04/2013 | 102.9          |
|      | 03/04/2013 | 100.1          |
|      | 03/04/2013 | 104.8          |
|      | 03/04/2013 | 106.2          |
|      | 03/04/2013 | 96.9           |
|      | 03/04/2013 | 90.8           |
|      | 03/04/2013 | 99.5           |
|      | 03/04/2013 | 104.4          |
|      | 03/04/2013 | 100.6          |
|      | 03/04/2013 | 114.0          |
|      | 03/04/2013 | 98.1           |
|      | 03/04/2013 | 104.8          |
|      | 03/04/2013 | 108.8          |
|      | 03/04/2013 | 99.8           |
|      | 03/04/2013 | 101.2          |
|      | 03/04/2013 | 108.3          |
|      | 03/04/2013 | 108.6          |
|      | 03/04/2013 | 103.8          |
|      | 03/04/2013 | 106.7          |
|      | 03/04/2013 | 104.8          |
| 6.70 | 08/04/2013 | 92.1           |
| 6.73 | 08/04/2013 | 91.2           |
| 6.74 | 08/04/2013 | 86.6           |
|      | 08/04/2013 | 88.2           |
|      | 08/04/2013 | 91.7           |
|      | 08/04/2013 | 85.0           |
| 6.69 | 08/04/2013 | 88.0           |
| 6.69 | 08/04/2013 | 88.9           |
| 6.68 | 08/04/2013 | 91.5           |
|      | 08/04/2013 | 98.6           |
|      | 08/04/2013 | 91.9           |
|      | 08/04/2013 | 92.8           |

|      |            |                |
|------|------------|----------------|
| 8.26 | 08/04/2013 | 97.8           |
| 8.26 | 08/04/2013 | 101.0          |
| 8.21 | 08/04/2013 | 91.7           |
| 8.09 | 08/04/2013 | 89.7           |
| 8.10 | 08/04/2013 | 86.6           |
| 4.96 | 08/04/2013 | 99.8           |
| 4.97 | 08/04/2013 | 98.4           |
| 4.98 | 08/04/2013 | 98.4           |
|      | 08/04/2013 | 98.5           |
|      | 08/04/2013 | 105.4          |
| 4.49 | 08/04/2013 | 41.1           |
| 4.79 | 08/04/2013 | Not detectable |
| 4.89 | 08/04/2013 | 98.3           |
| 4.72 | 08/04/2013 | 92.1           |
| 8.14 | 08/04/2013 | 99.1           |
| 8.11 | 08/04/2013 | 97.3           |
| 7.21 | 08/04/2013 | 100.9          |
| 7.03 | 08/04/2013 | 103.1          |
| 6.98 | 08/04/2013 | 100.4          |
|      | 08/04/2013 | 99.6           |
|      | 04/04/2013 | 94.2           |
|      | 04/04/2013 | 92.5           |
|      | 04/04/2013 | 90.4           |
|      | 04/04/2013 | 91.1           |
|      | 04/04/2013 | 97.1           |
|      | 04/04/2013 | 97.1           |
|      | 04/04/2013 | 91.2           |
|      | 04/04/2013 | 96.7           |
|      | 04/04/2013 | 85.3           |
|      | 04/04/2013 | 97.5           |
|      | 04/04/2013 | 94.6           |
|      | 04/04/2013 | 92.3           |
|      | 04/04/2013 | 97.6           |
|      | 04/04/2013 | 99.3           |
|      | 04/04/2013 | 96.0           |
|      | 04/04/2013 | 99.7           |
|      | 04/04/2013 | 95.5           |
|      | 04/04/2013 | 94.5           |
|      | 04/04/2013 | 108.6          |
|      | 04/04/2013 | 98.7           |
|      | 04/04/2013 | 93.4           |
|      | 04/04/2013 | 96.0           |
|      | 04/04/2013 | 101.4          |
|      | 04/04/2013 | 98.7           |
|      | 04/04/2013 | 101.4          |
|      | 04/04/2013 | 107.1          |
|      | 04/04/2013 | 103.5          |
|      | 04/04/2013 | 106.1          |
|      | 04/04/2013 | 104.9          |
|      | 04/04/2013 | 102.4          |



|      |            |       |
|------|------------|-------|
|      | 04/04/2013 | 99.7  |
|      | 04/04/2013 | 107.8 |
|      | 04/04/2013 | 106.3 |
|      | 04/04/2013 | 103.3 |
|      | 04/04/2013 | 100.0 |
|      | 04/04/2013 | 101.0 |
|      | 04/04/2013 | 99.8  |
|      | 04/04/2013 | 91.5  |
|      | 04/04/2013 | 100.8 |
|      | 04/04/2013 | 95.6  |
|      | 04/04/2013 | 94.4  |
|      | 04/04/2013 | 100.5 |
|      | 04/04/2013 | 99.2  |
|      | 04/04/2013 | 104.5 |
|      | 04/04/2013 | 95.0  |
|      | 04/04/2013 | 98.2  |
|      | 04/04/2013 | 91.0  |
|      | 04/04/2013 | 90.9  |
|      | 04/04/2013 | 90.8  |
|      | 04/04/2013 | 94.9  |
|      | 04/04/2013 | 106.1 |
|      | 04/04/2013 | 99.4  |
|      | 04/04/2013 | 105.2 |
|      | 04/04/2013 | 101.9 |
|      | 04/04/2013 | 100.7 |
|      | 04/04/2013 | 97.0  |
|      | 04/04/2013 | 91.1  |
|      | 04/04/2013 | 106.2 |
|      | 04/04/2013 | 105.9 |
|      | 04/04/2013 | 103.2 |
|      | 04/04/2013 | 101.4 |
|      | 04/04/2013 | 104.3 |
|      | 04/04/2013 | 102.7 |
|      | 04/04/2013 | 100.0 |
|      | 04/04/2013 | 104.4 |
|      | 04/04/2013 | 98.2  |
|      | 04/04/2013 | 104.2 |
|      | 04/04/2013 | 102.9 |
|      | 04/04/2013 | 107.4 |
|      | 04/04/2013 | 108.7 |
|      | 04/04/2013 | 110.1 |
|      | 04/04/2013 | 98.0  |
|      | 04/04/2013 | 103.8 |
|      | 04/04/2013 | 106.0 |
|      | 04/04/2013 | 101.9 |
| 5.03 | 04/04/2013 | 114.8 |
| 5.01 | 04/04/2013 | 103.5 |
| 5.11 | 04/04/2013 | 96.6  |
| 2.24 | 04/04/2013 | 93.4  |
| 5.24 | 04/04/2013 | 98.2  |

|      |     |            |              |
|------|-----|------------|--------------|
| 8.26 |     | 09/04/2013 | <b>101.3</b> |
| 8.30 |     | 09/04/2013 | <b>95.6</b>  |
| 8.31 |     | 09/04/2013 | <b>90.1</b>  |
|      |     | 09/04/2013 | <b>86</b>    |
|      |     | 09/04/2013 | <b>88.3</b>  |
|      |     | 09/04/2013 | <b>85.6</b>  |
| 4.72 |     | 09/04/2013 | <b>94.4</b>  |
| 4.68 |     | 09/04/2013 | <b>93.5</b>  |
| 4.64 |     | 09/04/2013 | <b>90.0</b>  |
|      |     | 09/04/2013 | <b>93.0</b>  |
|      |     | 09/04/2013 | <b>88.8</b>  |
| 8.16 |     | 09/04/2013 | <b>91.1</b>  |
| 8.22 |     | 09/04/2013 | <b>98.0</b>  |
| 8.17 |     | 09/04/2013 | <b>85.0</b>  |
|      |     | 09/04/2013 | <b>89.7</b>  |
|      |     | 09/04/2013 | <b>85.8</b>  |
|      |     | 09/04/2013 | <b>91.8</b>  |
|      |     | 09/04/2013 | <b>94.9</b>  |
|      |     | 09/04/2013 | <b>86.4</b>  |
|      |     | 09/04/2013 | <b>87.8</b>  |
| 8.12 |     | 09/04/2013 | <b>75.6</b>  |
|      |     | 01/07/2013 | <b>109.9</b> |
|      | CDC |            | <b>105.3</b> |
|      |     | 01/07/2013 | <b>115.0</b> |
|      |     | 01/07/2013 | <b>109.5</b> |
|      |     | 01/07/2013 | <b>109.2</b> |
|      |     | 01/07/2013 | <b>105.0</b> |
|      |     | 01/07/2013 | <b>106.3</b> |
|      |     | 01/07/2013 | <b>101.4</b> |
|      | CDC |            | <b>112.3</b> |
|      |     | 01/07/2013 | <b>111.5</b> |
|      |     | 01/07/2013 | <b>92.0</b>  |
|      |     | 01/07/2013 | <b>92.2</b>  |
|      | CDC |            | <b>84.5</b>  |
|      | CDC |            | <b>87.5</b>  |
|      |     | 01/07/2013 | <b>114.6</b> |
|      |     | 01/07/2013 | <b>89.2</b>  |
|      |     | 01/07/2013 | <b>105.9</b> |
|      |     | 01/07/2013 | <b>97.7</b>  |
|      | CDC |            | <b>117.0</b> |
|      | CDC |            | <b>102.9</b> |
|      |     | 01/07/2013 | <b>96.7</b>  |
|      | CDC |            | <b>111.2</b> |
|      | CDC |            | <b>102.9</b> |
|      |     | 01/07/2013 | <b>98.8</b>  |
|      |     | 01/07/2013 | <b>96.0</b>  |
|      |     | 01/07/2013 | <b>108.4</b> |
|      |     | 01/07/2013 | <b>114.6</b> |
|      | CDC |            | <b>100.9</b> |
|      | CDC |            | <b>104.9</b> |

|     |            |       |
|-----|------------|-------|
|     | 01/07/2013 | 104.6 |
|     | 01/07/2013 | 105.9 |
| CDC |            | 112.7 |
| CDC |            | 118.6 |
|     | 01/07/2013 | 95.7  |
|     | 01/07/2013 | 92.2  |
|     | 01/07/2013 | 106.4 |
|     | 01/07/2013 | 101.1 |
|     | 01/07/2013 | 95.1  |
| CDC |            | 117.6 |
| CDC |            | 98.8  |
|     | 01/07/2013 | 93.7  |
|     | 01/07/2013 | 101.2 |
|     | 01/07/2013 | 95.6  |
| CDC |            | 131.0 |
| CDC |            | 134.4 |
|     | 01/07/2013 | 100.8 |
|     | 01/07/2013 | 103.1 |
|     | 01/07/2013 | 99.1  |
|     | 01/07/2013 | 78.9  |
|     | 01/07/2013 | 92.8  |
|     | 01/07/2013 | 112.9 |
|     | 01/07/2013 | 107.9 |
|     | 01/07/2013 | 106.7 |
|     | 01/07/2013 | 113.0 |
|     | 01/07/2013 | 102.6 |
|     | 01/07/2013 | 101.3 |
|     | 01/07/2013 | 108.3 |
|     | 01/07/2013 | 103.1 |
|     | 01/07/2013 | 98.5  |
|     | 01/07/2013 | 102.9 |
|     | 01/07/2013 | 109.4 |
|     | 01/07/2013 | 103.7 |
|     | 01/07/2013 | 106.9 |
|     | 01/07/2013 | 105.5 |
|     | 01/07/2013 | 94.9  |
|     | 01/07/2013 | 101.8 |
|     | 01/07/2013 | 98.4  |
|     | 01/07/2013 | 102.5 |
|     | 01/07/2013 | 113.6 |
| CDC |            | 118.2 |
| CDC |            | 81.5  |
| CDC |            | 93.8  |
| CDC |            | 88.9  |
| CDC |            | 84.4  |
| CDC |            | 117.0 |
| CDC |            | 93.3  |
| CDC |            | 90.6  |
| CDC |            | 90.8  |
| CDC |            | 90.7  |

|      |     |            |              |
|------|-----|------------|--------------|
|      | CDC |            | <b>75.4</b>  |
|      | CDC |            | <b>86.7</b>  |
|      | CDC |            | <b>114.6</b> |
|      | CDC |            | <b>106.4</b> |
|      | CDC |            | <b>101.1</b> |
|      | CDC |            | <b>80.0</b>  |
|      | CDC |            | <b>87.5</b>  |
|      |     | 01/07/2013 | <b>99.8</b>  |
|      |     | 01/07/2013 | <b>99.8</b>  |
|      |     | 01/07/2013 | <b>103.8</b> |
|      |     | 01/07/2013 | <b>98.5</b>  |
|      | CDC |            | <b>85.4</b>  |
|      | CDC |            | <b>104.8</b> |
| 6.60 |     | 08/03/2013 | <b>85.0</b>  |
| 6.42 |     | 08/03/2013 | <b>75.1</b>  |
|      |     | 08/03/2013 | <b>85.9</b>  |
|      |     | 08/03/2013 | <b>89.7</b>  |
|      |     | 08/03/2013 | <b>87.6</b>  |
| 9.02 |     | 08/03/2013 | <b>73.0</b>  |
| 8.59 |     | 08/03/2013 | <b>34.6</b>  |
| 8.70 |     | 08/03/2013 | <b>78.9</b>  |
|      |     | 08/03/2013 | <b>82.5</b>  |
|      |     | 08/03/2013 | <b>54.0</b>  |
|      |     | 08/03/2013 | <b>73.1</b>  |
|      | CDC |            | <b>117.6</b> |
|      |     | 28/06/2013 | <b>107.5</b> |
|      | CDC |            | <b>94.9</b>  |
|      |     | 28/06/2013 | <b>84.6</b>  |
|      | CDC |            | <b>100.2</b> |
|      |     | 28/06/2013 | <b>107.2</b> |
|      | CDC |            | <b>81.9</b>  |
|      |     | 28/06/2013 | <b>104.0</b> |
|      | CDC |            | <b>92.2</b>  |
|      |     | 28/06/2013 | <b>92.8</b>  |
|      | CDC |            | <b>112.8</b> |
|      |     | 28/06/2013 | <b>105.3</b> |
|      | CDC |            | <b>105.5</b> |
|      |     | 28/06/2013 | <b>111.9</b> |
|      | CDC |            | <b>102.0</b> |
|      |     | 28/06/2013 | <b>93.6</b>  |
|      | CDC |            | <b>115.4</b> |
|      |     | 01/07/2013 | <b>98.7</b>  |
|      |     | 16/08/2013 | <b>209.9</b> |
|      |     | 16/08/2013 | <b>105.6</b> |
|      | CDC |            | <b>60.4</b>  |
|      |     | 16/08/2013 | <b>110.4</b> |
|      |     | 16/08/2013 | <b>109.1</b> |
|      | CDC |            | <b>43.8</b>  |
|      |     | 16/08/2013 | <b>125.3</b> |
|      |     | 16/08/2013 | <b>112.1</b> |

|      |     |            |              |
|------|-----|------------|--------------|
|      | CDC |            | <b>30.7</b>  |
|      |     | 16/08/2013 | <b>121.3</b> |
|      | CDC |            | <b>36.1</b>  |
|      |     | 16/08/2013 | <b>77.9</b>  |
|      |     | 16/08/2013 | <b>115.6</b> |
|      |     | 16/08/2013 | <b>110.5</b> |
|      | CDC |            | <b>92.7</b>  |
|      |     | 16/08/2013 | <b>105.8</b> |
|      | CDC |            | <b>111.2</b> |
|      |     | 16/08/2013 | <b>57.2</b>  |
|      |     | 16/08/2013 | <b>115.6</b> |
|      | CDC |            | <b>81.1</b>  |
|      |     | 16/08/2013 | <b>43.5</b>  |
|      | CDC |            | <b>73.5</b>  |
|      |     | 16/08/2013 | <b>113.0</b> |
|      | CDC |            | <b>69.8</b>  |
|      |     | 16/08/2013 | <b>109.0</b> |
|      | CDC |            | <b>71.1</b>  |
|      |     | 16/08/2013 | <b>104.7</b> |
|      | CDC |            | <b>74.8</b>  |
|      |     | 16/08/2013 | <b>94.5</b>  |
|      | CDC |            | <b>95.1</b>  |
|      |     | 16/08/2013 | <b>56.0</b>  |
|      | CDC |            | <b>52.1</b>  |
|      |     | 16/08/2013 | <b>23.0</b>  |
|      | CDC |            | <b>82.9</b>  |
|      |     | 16/08/2013 | <b>66.9</b>  |
|      | CDC |            | <b>87.0</b>  |
|      |     | 16/08/2013 | <b>101.2</b> |
|      | CDC |            | <b>74.8</b>  |
|      |     | 16/08/2013 | <b>86.0</b>  |
|      | CDC |            | <b>101.6</b> |
|      |     | 16/08/2013 | <b>114.4</b> |
|      | CDC |            | <b>99.1</b>  |
|      |     | 16/08/2013 | <b>118.8</b> |
|      |     | 16/08/2013 | <b>71.6</b>  |
| 3.56 |     | 02/05/2013 | <b>106.6</b> |
| 3.01 |     | 02/05/2013 | <b>93.6</b>  |
| 3.05 |     | 02/05/2013 | <b>101.3</b> |
| 3.16 |     | 02/05/2013 | <b>105.7</b> |
| 2.97 |     | 02/05/2013 | <b>96.9</b>  |
| 3.04 |     | 02/05/2013 | <b>108.0</b> |
|      |     | 02/05/2013 | <b>104.6</b> |
|      |     | 02/05/2013 | <b>107.4</b> |
|      |     | 02/05/2013 | <b>110.5</b> |
|      |     | 02/05/2013 | <b>110.1</b> |
|      |     | 02/05/2013 | <b>102.8</b> |
|      |     | 02/05/2013 | <b>86.9</b>  |
|      |     | 02/05/2013 | <b>105.0</b> |
|      |     | 02/05/2013 | <b>111.3</b> |

|      |            |       |
|------|------------|-------|
|      | 02/05/2013 | 110.8 |
|      | 02/05/2013 | 106.0 |
|      | 02/05/2013 | 105.1 |
|      | 02/05/2013 | 109.5 |
|      | 02/05/2013 | 107.3 |
|      | 02/05/2013 | 105.0 |
|      | 02/05/2013 | 113.0 |
|      | 02/05/2013 | 109.1 |
|      | 02/05/2013 | 106.3 |
|      | 02/05/2013 | 104.0 |
|      | 02/05/2013 | 106.7 |
|      | 02/05/2013 | 107.5 |
|      | 02/05/2013 | 109.7 |
|      | 02/05/2013 | 113.8 |
|      | 02/05/2013 | 109.3 |
|      | 02/05/2013 | 105.1 |
|      | 02/05/2013 | 104.1 |
|      | 02/05/2013 | 102.3 |
|      | 02/05/2013 | 103.6 |
|      | 02/05/2013 | 108.4 |
|      | 02/05/2013 | 111.4 |
|      | 02/05/2013 | 106.9 |
|      | 02/05/2013 | 107.6 |
|      | 02/05/2013 | 103.4 |
|      | 02/05/2013 | 103.8 |
|      | 02/05/2013 | 103.8 |
|      | 02/05/2013 | 105.6 |
|      | 02/05/2013 | 104.6 |
|      | 02/05/2013 | 86.4  |
|      | 02/05/2013 | 105.7 |
|      | 02/05/2013 | 111.3 |
|      | 02/05/2013 | 106.0 |
|      | 02/05/2013 | 106.7 |
|      | 02/05/2013 | 101.4 |
|      | 02/05/2013 | 103.6 |
|      | 02/05/2013 | 106.9 |
|      | 02/05/2013 | 109.3 |
| 3.68 | 02/05/2013 | 90.1  |
| 3.63 | 02/05/2013 | 106.5 |
| 3.66 | 02/05/2013 | 106.9 |
| 3.69 | 02/05/2013 | 65.9  |
| 3.64 | 02/05/2013 | 51.7  |
|      | 02/05/2013 | 98.2  |
|      | 02/05/2013 | 78.4  |
|      | 02/05/2013 | 105.2 |
|      | 02/05/2013 | 104.3 |
|      | 02/05/2013 | 94.0  |
| 4.62 | 02/05/2013 | 0.6   |
| 4.50 | 02/05/2013 | 0.1   |
| 4.58 | 02/05/2013 | 1.1   |

|      |            |              |
|------|------------|--------------|
| 4.61 | 02/05/2013 | <b>0.7</b>   |
| 3.53 | 02/05/2013 | <b>103.4</b> |
| 3.62 | 02/05/2013 | <b>108.9</b> |
| 3.52 | 02/05/2013 | <b>102.0</b> |
| 3.42 | 02/05/2013 | <b>106.3</b> |
| 3.47 | 02/05/2013 | <b>114.2</b> |
| 3.43 | 02/05/2013 | <b>106.3</b> |
| 2.98 | 02/05/2013 | <b>112.0</b> |
| 3.17 | 02/05/2013 | <b>108.0</b> |
| 3.07 | 02/05/2013 | <b>94.6</b>  |
| 3.08 | 03/05/2013 | <b>101.8</b> |
| 3.24 | 03/05/2013 | <b>106.5</b> |
| 3.18 | 03/05/2013 | <b>107.5</b> |
| 3.16 | 03/05/2013 | <b>105.0</b> |
| 3.21 | 03/05/2013 | <b>107.2</b> |
|      | 03/05/2013 | <b>107.8</b> |
|      | 03/05/2013 | <b>105.9</b> |
|      | 03/05/2013 | <b>105.2</b> |
|      | 03/05/2013 | <b>104.9</b> |
|      | 03/05/2013 | <b>107.0</b> |
|      | 03/05/2013 | <b>104.7</b> |
|      | 03/05/2013 | <b>107.7</b> |
|      | 03/05/2013 | <b>113.5</b> |
|      | 03/05/2013 | <b>97.9</b>  |
|      | 03/05/2013 | <b>108.7</b> |
|      | 03/05/2013 | <b>104.2</b> |
|      | 03/05/2013 | <b>105.8</b> |
|      | 03/05/2013 | <b>107.0</b> |
|      | 03/05/2013 | <b>110.4</b> |
|      | 03/05/2013 | <b>110.3</b> |
|      | 03/05/2013 | <b>104.0</b> |
|      | 03/05/2013 | <b>110.8</b> |
|      | 03/05/2013 | <b>104.3</b> |
|      | 03/05/2013 | <b>107.8</b> |
|      | 03/05/2013 | <b>111.0</b> |
|      | 03/05/2013 | <b>100.6</b> |
|      | 03/05/2013 | <b>102.2</b> |
|      | 03/05/2013 | <b>109.8</b> |
|      | 03/05/2013 | <b>107.8</b> |
|      | 03/05/2013 | <b>109.9</b> |
|      | 03/05/2013 | <b>107.3</b> |
|      | 03/05/2013 | <b>105.2</b> |
|      | 03/05/2013 | <b>112.2</b> |
|      | 03/05/2013 | <b>109.4</b> |
|      | 03/05/2013 | <b>112.2</b> |
|      | 03/05/2013 | <b>109.9</b> |
|      | 03/05/2013 | <b>106.1</b> |
|      | 03/05/2013 | <b>109.0</b> |
|      | 03/05/2013 | <b>105.2</b> |
|      | 03/05/2013 | <b>107.8</b> |

|      |            |                       |
|------|------------|-----------------------|
|      | 03/05/2013 | <b>Not detectable</b> |
|      | 03/05/2013 | <b>113.7</b>          |
|      | 03/05/2013 | <b>106.0</b>          |
|      | 03/05/2013 | <b>105.5</b>          |
|      | 03/05/2013 | <b>111.1</b>          |
|      | 03/05/2013 | <b>108.0</b>          |
|      | 03/05/2013 | <b>102.0</b>          |
| 3.45 | 03/05/2013 | <b>Not detectable</b> |
| 3.43 | 03/05/2013 | <b>Not detectable</b> |
|      | 03/05/2013 | <b>103.1</b>          |
|      | 03/05/2013 | <b>100.6</b>          |
| 3.12 | 03/05/2013 | <b>109.8</b>          |
|      | 03/05/2013 | <b>102.5</b>          |
| 3.14 | 03/05/2013 | <b>108.1</b>          |
|      | 03/05/2013 | <b>111.7</b>          |
|      | 03/05/2013 | <b>108.6</b>          |
|      | 03/05/2013 | <b>108.7</b>          |
|      | 03/05/2013 | <b>107.7</b>          |
|      | 03/05/2013 | <b>104.2</b>          |
|      | 03/05/2013 | <b>103.0</b>          |
|      | 03/05/2013 | <b>107.2</b>          |
|      | 03/05/2013 | <b>112.7</b>          |
|      | 03/05/2013 | <b>111.8</b>          |
|      | 03/05/2013 | <b>106.0</b>          |
|      | 03/05/2013 | <b>107.4</b>          |
| 4.21 | 03/05/2013 | <b>109.6</b>          |
| 4.25 | 03/05/2013 | <b>103.7</b>          |
| 4.28 | 03/05/2013 | <b>106.2</b>          |
| 4.27 | 03/05/2013 | <b>108.8</b>          |
| 4.21 | 03/05/2013 | <b>108.9</b>          |
|      | 03/05/2013 | <b>106.2</b>          |
|      | 03/05/2013 | <b>109.7</b>          |
|      | 03/05/2013 | <b>110.5</b>          |
|      | 03/05/2013 | <b>113.2</b>          |
|      | 03/05/2013 | <b>101.2</b>          |
|      | 03/05/2013 | <b>98.7</b>           |
|      | 03/05/2013 | <b>104.8</b>          |
|      | 03/05/2013 | <b>103.5</b>          |
|      | 03/05/2013 | <b>109.7</b>          |
|      | 03/05/2013 | <b>107.4</b>          |
|      | 03/05/2013 | <b>103.8</b>          |
| 3.12 | 07/05/2013 | <b>95.3</b>           |
| 3.17 | 07/05/2013 | <b>97.1</b>           |
| 3.13 | 07/05/2013 | <b>92.3</b>           |
| 3.15 | 07/05/2013 | <b>94.0</b>           |
| 3.13 | 07/05/2013 | <b>94.9</b>           |
| 3.13 | 07/05/2013 | <b>96.6</b>           |
| 3.13 | 07/05/2013 | <b>92.6</b>           |
| 3.19 | 07/05/2013 | <b>94.5</b>           |
| 3.23 | 07/05/2013 | <b>85.2</b>           |



|      |            |       |
|------|------------|-------|
| 3.18 | 07/05/2013 | 98.6  |
| 3.26 | 07/05/2013 | 99.9  |
| 3.20 | 07/05/2013 | 95.2  |
| 3.61 | 07/05/2013 | 111.8 |
| 3.54 | 07/05/2013 | 104.3 |
| 3.56 | 07/05/2013 | 98.9  |
| 3.63 | 07/05/2013 | 96.8  |
| 3.47 | 07/05/2013 | 95.9  |
| 3.50 | 07/05/2013 | 110.9 |
|      | 07/05/2013 | 102.9 |
|      | 07/05/2013 | 110.3 |
|      | 07/05/2013 | 111.6 |
|      | 07/05/2013 | 108.6 |
|      | 07/05/2013 | 111.2 |
|      | 07/05/2013 | 106.1 |
|      | 07/05/2013 | 112.5 |
|      | 07/05/2013 | 104.9 |
|      | 07/05/2013 | 113.3 |
|      | 07/05/2013 | 109.9 |
|      | 07/05/2013 | 106.7 |
|      | 07/05/2013 | 112.7 |
|      | 07/05/2013 | 111.6 |
|      | 07/05/2013 | 110.1 |
|      | 07/05/2013 | 106.8 |
|      | 07/05/2013 | 110.7 |
|      | 07/05/2013 | 94.9  |
|      | 07/05/2013 | 105.6 |
|      | 07/05/2013 | 108.0 |
|      | 07/05/2013 | 109.8 |
|      | 07/05/2013 | 98.6  |
|      | 07/05/2013 | 108.0 |
|      | 07/05/2013 | 109.7 |
|      | 07/05/2013 | 113.5 |
|      | 07/05/2013 | 105.0 |
|      | 07/05/2013 | 106.6 |
|      | 07/05/2013 | 114.0 |
|      | 07/05/2013 | 99.2  |
|      | 07/05/2013 | 103.6 |
|      | 07/05/2013 | 113.3 |
|      | 07/05/2013 | 107.7 |
|      | 07/05/2013 | 99.6  |
|      | 07/05/2013 | 98.5  |
|      | 07/05/2013 | 106.5 |
|      | 07/05/2013 | 99.5  |
|      | 07/05/2013 | 99.7  |
|      | 07/05/2013 | 103.5 |
|      | 07/05/2013 | 110.6 |
|      | 07/05/2013 | 108.7 |
|      | 07/05/2013 | 102.1 |
|      | 07/05/2013 | 110.5 |

|      |            |       |
|------|------------|-------|
|      | 07/05/2013 | 105.7 |
|      | 07/05/2013 | 113.5 |
|      | 07/05/2013 | 111.5 |
|      | 07/05/2013 | 106.1 |
|      | 07/05/2013 | 99.2  |
|      | 07/05/2013 | 103.6 |
|      | 07/05/2013 | 113.3 |
|      | 07/05/2013 | 107.7 |
|      | 07/05/2013 | 99.6  |
|      | 07/05/2013 | 98.5  |
|      | 07/05/2013 | 106.5 |
|      | 07/05/2013 | 99.5  |
|      | 07/05/2013 | 99.7  |
|      | 07/05/2013 | 103.5 |
|      | 07/05/2013 | 110.6 |
|      | 07/05/2013 | 108.7 |
|      | 07/05/2013 | 102.1 |
|      | 07/05/2013 | 110.0 |
|      | 07/05/2013 | 105.6 |
|      | 07/05/2013 | 112.8 |
|      | 07/05/2013 | 110.9 |
|      | 07/05/2013 | 106.1 |
|      | 07/05/2013 | 105.8 |
|      | 07/05/2013 | 108.8 |
| 3.83 | 08/05/2013 | 89.7  |
| 3.28 | 08/05/2013 | 98.5  |
| 3.83 | 08/05/2013 | 69.0  |
| 3.50 | 08/05/2013 | 104.0 |
| 3.48 | 08/05/2013 | 102.4 |
| 3.53 | 08/05/2013 | 103.7 |
| 3.47 | 08/05/2013 | 96.7  |
| 3.51 | 08/05/2013 | 104.2 |
| 3.52 | 08/05/2013 | 105.2 |
| 3.49 | 08/05/2013 | 103.2 |
| 4.34 | 09/05/2013 | 109.6 |
| 4.72 | 09/05/2013 | 100.8 |
| 4.79 | 09/05/2013 | 86.3  |
| 5.04 | 09/05/2013 | 108.8 |
| 4.95 | 09/05/2013 | 100.5 |
| 4.99 | 09/05/2013 | 102.3 |
| 5.01 | 09/05/2013 | 106.4 |
| 4.98 | 09/05/2013 | 104.5 |
|      | 09/05/2013 | 102.3 |
|      | 09/05/2013 | 109.5 |
|      | 09/05/2013 | 105.1 |
|      | 09/05/2013 | 108.6 |
|      | 09/05/2013 | 109.5 |
|      | 09/05/2013 | 101.9 |
|      | 09/05/2013 | 109.6 |
|      | 09/05/2013 | 106.7 |

|      |            |       |
|------|------------|-------|
|      | 09/05/2013 | 114.2 |
|      | 09/05/2013 | 101.6 |
|      | 09/05/2013 | 104.9 |
| 6.53 | 09/05/2013 | 103.3 |
| 4.11 | 09/05/2013 | 107.3 |
| 3.56 | 09/05/2013 | 107.7 |
| 3.68 | 09/05/2013 | 101.7 |
| 4.57 | 09/05/2013 | 92.3  |
| 5.48 | 09/05/2013 | 102.6 |
| 4.71 | 09/05/2013 | 98.1  |
| 4.98 | 10/05/2013 | 106.1 |
| 5.00 | 10/05/2013 | 101.5 |
| 4.93 | 10/05/2013 | 104.4 |
| 4.92 | 10/05/2013 | 104.4 |
| 4.92 | 10/05/2013 | 100.1 |
|      | 10/05/2013 | 113.3 |
|      | 10/05/2013 | 103.4 |
|      | 10/05/2013 | 101.0 |
|      | 10/05/2013 | 102.3 |
|      | 10/05/2013 | 109.6 |
|      | 10/05/2013 | 91.3  |
|      | 10/05/2013 | 104.1 |
|      | 10/05/2013 | 102.6 |
|      | 10/05/2013 | 110.7 |
|      | 10/05/2013 | 110.3 |
|      | 10/05/2013 | 110.3 |
|      | 10/05/2013 | 109.1 |
|      | 10/05/2013 | 106.2 |
|      | 10/05/2013 | 110.6 |
| 6.06 | 10/05/2013 | 110.0 |
| 6.24 | 10/05/2013 | 106.6 |
| 6.15 | 10/05/2013 | 105.6 |
| 6.04 | 10/05/2013 | 104.2 |
| 6.13 | 10/05/2013 | 109.1 |
|      | 10/05/2013 | 108.5 |
|      | 10/05/2013 | 110.6 |
|      | 10/05/2013 | 108.2 |
| 6.08 | 10/05/2013 | 87.9  |
| 6.07 | 10/05/2013 | 90.7  |
| 6.22 | 10/05/2013 | 97.1  |
| 6.25 | 10/05/2013 | 96.4  |
| 6.37 | 10/05/2013 | 98.5  |
|      | 10/05/2013 | 97.8  |
| 7.76 | 10/05/2013 | 97.0  |
| 7.77 | 10/05/2013 | 109.6 |
| 7.81 | 10/05/2013 | 101.6 |
| 7.85 | 10/05/2013 | 99.2  |
| 6.59 | 10/05/2013 | 114.6 |
| 4.73 | 10/05/2013 | 96.7  |
| 6.58 | 10/05/2013 | 99.1  |

|      |            |              |
|------|------------|--------------|
| 6.61 | 10/05/2013 | <b>110.3</b> |
| 6.60 | 10/05/2013 | <b>112.8</b> |
| 6.33 | 10/05/2013 | <b>114.0</b> |
| 6.30 | 10/05/2013 | <b>98.9</b>  |
| 6.30 | 10/05/2013 | <b>108.9</b> |
| 4.20 | 10/05/2013 | <b>96.0</b>  |
| 4.34 | 10/05/2013 | <b>111.3</b> |
| 4.24 | 10/05/2013 | <b>113.9</b> |
| 4.48 | 10/05/2013 | <b>115.0</b> |
| 4.41 | 10/05/2013 | <b>110.5</b> |
|      | 10/05/2013 | <b>109.9</b> |
|      | 10/05/2013 | <b>100.7</b> |
| 5.97 | 10/05/2013 | <b>106.4</b> |
| 6.04 | 10/05/2013 | <b>105.8</b> |
| 6.04 | 10/05/2013 | <b>106.9</b> |
| 6.11 | 10/05/2013 | <b>111.6</b> |
| 6.01 | 10/05/2013 | <b>107.9</b> |
|      | 10/05/2013 | <b>108.2</b> |
|      | 10/05/2013 | <b>104.8</b> |
| 6.04 | 10/05/2013 | <b>105.6</b> |
| 5.80 | 10/05/2013 | <b>114.3</b> |
| 6.44 | 14/05/2013 | <b>103.1</b> |
| 5.81 | 14/05/2013 | <b>100.0</b> |
| 6.11 | 14/05/2013 | <b>104.8</b> |
| 5.94 | 14/05/2013 | <b>92.1</b>  |
| 6.14 | 14/05/2013 | <b>108.7</b> |
| 5.93 | 14/05/2013 | <b>93.9</b>  |
| 6.10 | 14/05/2013 | <b>113.6</b> |
| 6.33 | 14/05/2013 | <b>114.7</b> |
| 6.28 | 14/05/2013 | <b>113.2</b> |
| 6.23 | 14/05/2013 | <b>110.9</b> |
| 6.16 | 14/05/2013 | <b>114.8</b> |
| 6.25 | 14/05/2013 | <b>111.9</b> |
| 6.23 | 14/05/2013 | <b>114.6</b> |
|      | 14/05/2013 | <b>110.1</b> |
|      | 14/05/2013 | <b>114.3</b> |
|      | 14/05/2013 | <b>113.5</b> |
|      | 14/05/2013 | <b>113.4</b> |
|      | 14/05/2013 | <b>113.4</b> |
| 9.23 | 14/05/2013 | <b>96.3</b>  |
| 5.21 | 14/05/2013 | <b>113.7</b> |
| 5.22 | 14/05/2013 | <b>106.6</b> |
| 6.45 | 14/05/2013 | <b>102.4</b> |
| 6.37 | 14/05/2013 | <b>105.2</b> |
| 6.70 | 14/05/2013 | <b>103.4</b> |
| 6.33 | 14/05/2013 | <b>103.9</b> |
| 6.49 | 14/05/2013 | <b>108.9</b> |
|      | 14/05/2013 | <b>106.1</b> |
|      | 14/05/2013 | <b>92.4</b>  |
|      | 14/05/2013 | <b>106.8</b> |

|      |            |              |
|------|------------|--------------|
|      | 14/05/2013 | <b>109.6</b> |
| 7.14 | 14/05/2013 | <b>105.1</b> |
| 7.17 | 14/05/2013 | <b>107.8</b> |
| 7.18 | 14/05/2013 | <b>114.9</b> |
| 7.14 | 14/05/2013 | <b>112.0</b> |
| 7.17 | 14/05/2013 | <b>108.0</b> |
|      | 14/05/2013 | <b>107.7</b> |
|      | 14/05/2013 | <b>95.4</b>  |
|      | 14/05/2013 | <b>108.7</b> |
|      | 14/05/2013 | <b>106.4</b> |
|      | 14/05/2013 | <b>110.7</b> |
|      | 14/05/2013 | <b>113.3</b> |
|      | 14/05/2013 | <b>112.8</b> |
|      | 14/05/2013 | <b>114.0</b> |
|      | 14/05/2013 | <b>107.3</b> |
|      | 14/05/2013 | <b>109.8</b> |
| 6.50 | 15/05/2013 | <b>109.6</b> |
| 6.07 | 15/05/2013 | <b>106.3</b> |
| 6.28 | 15/05/2013 | <b>108.2</b> |
| 6.46 | 15/05/2013 | <b>110.8</b> |
| 6.24 | 15/05/2013 | <b>110.8</b> |
|      | 15/05/2013 | <b>108.0</b> |
|      | 15/05/2013 | <b>107.6</b> |
|      | 15/05/2013 | <b>97.8</b>  |
|      | 15/05/2013 | <b>97.9</b>  |
|      | 15/05/2013 | <b>98.9</b>  |
|      | 15/05/2013 | <b>96.0</b>  |
|      | 15/05/2013 | <b>94.7</b>  |
|      | 15/05/2013 | <b>92.5</b>  |
|      | 15/05/2013 | <b>89.0</b>  |
|      | 15/05/2013 | <b>87.0</b>  |
|      | 15/05/2013 | <b>86.0</b>  |
|      | 15/05/2013 | <b>86.9</b>  |
|      | 15/05/2013 | <b>87.9</b>  |
|      | 15/05/2013 | <b>89.5</b>  |
|      | 15/05/2013 | <b>86.8</b>  |
|      | 15/05/2013 | <b>94.5</b>  |
|      | 15/05/2013 | <b>108.3</b> |
|      | 15/05/2013 | <b>109.6</b> |
|      | 15/05/2013 | <b>111.4</b> |
|      | 15/05/2013 | <b>103.4</b> |
|      | 15/05/2013 | <b>87.2</b>  |
|      | 15/05/2013 | <b>104.4</b> |
|      | 15/05/2013 | <b>86.4</b>  |
|      | 15/05/2013 | <b>104.3</b> |
|      | 15/05/2013 | <b>99.0</b>  |
|      | 15/05/2013 | <b>97.9</b>  |
|      | 15/05/2013 | <b>95.7</b>  |
|      | 15/05/2013 | <b>96.8</b>  |
|      | 15/05/2013 | <b>93.1</b>  |

|      |            |       |
|------|------------|-------|
|      | 15/05/2013 | 95.2  |
|      | 15/05/2013 | 101.1 |
|      | 15/05/2013 | 103.0 |
|      | 15/05/2013 | 95.7  |
|      | 15/05/2013 | 100.7 |
|      | 15/05/2013 | 104.0 |
|      | 15/05/2013 | 99.1  |
|      | 15/05/2013 | 96.5  |
|      | 15/05/2013 | 92.0  |
|      | 15/05/2013 | 92.6  |
|      | 15/05/2013 | 97.3  |
|      | 15/05/2013 | 94.2  |
|      | 15/05/2013 | 87.6  |
|      | 15/05/2013 | 105.8 |
|      | 15/05/2013 | 90.8  |
|      | 15/05/2013 | 90.8  |
|      | 15/05/2013 | 94.9  |
|      | 15/05/2013 | 94.4  |
|      | 15/05/2013 | 97.3  |
|      | 15/05/2013 | 97.9  |
|      | 15/05/2013 | 97.2  |
|      | 15/05/2013 | 99.5  |
|      | 15/05/2013 | 99.9  |
|      | 15/05/2013 | 95.7  |
|      | 15/05/2013 | 102.0 |
|      | 15/05/2013 | 98.3  |
|      | 15/05/2013 | 90.9  |
|      | 15/05/2013 | 96.8  |
|      | 15/05/2013 | 98.2  |
|      | 15/05/2013 | 94.5  |
|      | 15/05/2013 | 107.0 |
|      | 15/05/2013 | 104.1 |
|      | 15/05/2013 | 99.3  |
|      | 15/05/2013 | 99.3  |
|      | 15/05/2013 | 100.1 |
|      | 15/05/2013 | 98.3  |
|      | 15/05/2013 | 106.5 |
|      | 15/05/2013 | 96.6  |
|      | 15/05/2013 | 94.0  |
|      | 15/05/2013 | 93.6  |
|      | 15/05/2013 | 97.7  |
| 6.13 | 16/05/2013 | 99.7  |
| 6.03 | 16/05/2013 | 97.7  |
| 5.94 | 16/05/2013 | 101.4 |
| 6.08 | 16/05/2013 | 103.5 |
| 7.62 | 16/05/2013 | 91.8  |
| 7.7  | 16/05/2013 | 101.1 |
| 7.7  | 16/05/2013 | 91.5  |
| 7.67 | 16/05/2013 | 95.8  |
| 7.64 | 16/05/2013 | 95.7  |

|      |            |              |
|------|------------|--------------|
|      | 16/05/2013 | <b>103.9</b> |
|      | 16/05/2013 | <b>114.3</b> |
|      | 16/05/2013 | <b>108.6</b> |
|      | 16/05/2013 | <b>107.3</b> |
|      | 16/05/2013 | <b>104.6</b> |
|      | 16/05/2013 | <b>89.5</b>  |
|      | 16/05/2013 | <b>94.9</b>  |
|      | 16/05/2013 | <b>91.1</b>  |
|      | 16/05/2013 | <b>100.2</b> |
|      | 16/05/2013 | <b>89.0</b>  |
| 5.59 | 16/05/2013 | <b>88.8</b>  |
| 5.49 | 16/05/2013 | <b>91.2</b>  |
| 5.55 | 16/05/2013 | <b>86.5</b>  |
| 5.7  | 16/05/2013 | <b>93.9</b>  |
| 5.52 | 16/05/2013 | <b>101.4</b> |
| 6.13 | 16/05/2013 | <b>93.5</b>  |
| 6.4  | 16/05/2013 | <b>90.4</b>  |
| 6.06 | 16/05/2013 | <b>86.6</b>  |
| 6.21 | 16/05/2013 | <b>94.0</b>  |
| 6.09 | 16/05/2013 | <b>87.6</b>  |
| 6.35 | 16/05/2013 | <b>94.7</b>  |
|      | 16/05/2013 | <b>97.7</b>  |
|      | 16/05/2013 | <b>95.6</b>  |
|      | 16/05/2013 | <b>85.5</b>  |
|      | 16/05/2013 | <b>94.6</b>  |
|      | 16/05/2013 | <b>92.7</b>  |
| 6.21 | 16/05/2013 | <b>94.3</b>  |
| 6.21 | 16/05/2013 | <b>103.3</b> |
| 6.28 | 16/05/2013 | <b>101.7</b> |
| 6.29 | 16/05/2013 | <b>94.9</b>  |
| 6.22 | 16/05/2013 | <b>97.6</b>  |
|      | 16/05/2013 | <b>101.1</b> |
|      | 16/05/2013 | <b>96.4</b>  |
| 6.35 | 16/05/2013 | <b>98.3</b>  |
| 6.61 | 16/05/2013 | <b>95.9</b>  |
| 6.58 | 16/05/2013 | <b>102.5</b> |
| 6.56 | 16/05/2013 | <b>102.7</b> |
| 6.32 | 16/05/2013 | <b>97.3</b>  |
|      | 16/05/2013 | <b>107.8</b> |
|      | 16/05/2013 | <b>101.5</b> |
|      | 16/05/2013 | <b>103.0</b> |
|      | 16/05/2013 | <b>109.0</b> |
| 8.09 | 16/05/2013 | <b>102.3</b> |
| 8.11 | 16/05/2013 | <b>102.1</b> |
| 8.13 | 16/05/2013 | <b>106.6</b> |
| 8.17 | 16/05/2013 | <b>107.4</b> |
| 8.07 | 16/05/2013 | <b>107.5</b> |
|      | 16/05/2013 | <b>100.4</b> |
| 4.63 | 28/05/2013 | <b>100.5</b> |
| 4.39 | 28/05/2013 | <b>94.4</b>  |

|      |            |       |
|------|------------|-------|
| 2.91 | 28/05/2013 | 99.9  |
| 2.93 | 28/05/2013 | 101.6 |
| 2.88 | 28/05/2013 | 100.8 |
| 2.94 | 28/05/2013 | 100.3 |
| 2.99 | 28/05/2013 | 101.3 |
|      | 28/05/2013 | 98.1  |
|      | 28/05/2013 | 98.8  |
|      | 28/05/2013 | 100.2 |
|      | 28/05/2013 | 100.6 |
|      | 28/05/2013 | 99.7  |
|      | 28/05/2013 | 98.0  |
|      | 28/05/2013 | 103.4 |
|      | 28/05/2013 | 99.9  |
|      | 28/05/2013 | 102.0 |
|      | 28/05/2013 | 101.2 |
|      | 28/05/2013 | 98.8  |
|      | 28/05/2013 | 100.5 |
|      | 28/05/2013 | 100.8 |
|      | 28/05/2013 | 98.6  |
|      | 28/05/2013 | 96.2  |
|      | 28/05/2013 | 98.3  |
|      | 28/05/2013 | 99.6  |
|      | 28/05/2013 | 104.3 |
|      | 28/05/2013 | 100.9 |
|      | 28/05/2013 | 100.8 |
|      | 28/05/2013 | 102.5 |
|      | 28/05/2013 | 98.1  |
|      | 28/05/2013 | 100.2 |
|      | 28/05/2013 | 99.7  |
|      | 28/05/2013 | 100.9 |
|      | 28/05/2013 | 99.9  |
|      | 28/05/2013 | 99.7  |
|      | 28/05/2013 | 99.4  |
|      | 28/05/2013 | 101.7 |
|      | 28/05/2013 | 99.1  |
| 4.68 | 28/05/2013 | 91.3  |
| 4.45 | 28/05/2013 | 93.7  |
| 3.85 | 28/05/2013 | 96.4  |
| 4.02 | 28/05/2013 | 102.4 |
| 3.50 | 06/06/2013 | 107.3 |
| 3.55 | 06/06/2013 | 105.9 |
| 3.53 | 06/06/2013 | 102.6 |
|      | 06/06/2013 | 92.4  |
|      | 06/06/2013 | 98.3  |
|      | 06/06/2013 | 103.4 |
|      | 06/06/2013 | 109.6 |
|      | 06/06/2013 | 101.4 |
|      | 06/06/2013 | 103.1 |
|      | 06/06/2013 | 110.1 |
|      | 06/06/2013 | 106.0 |



|      |            |       |
|------|------------|-------|
| 3.72 | 06/06/2013 | 96.6  |
|      | 06/06/2013 | 111.0 |
|      | 06/06/2013 | 110.7 |
|      | 06/06/2013 | 107.7 |
| 4.27 | 06/06/2013 | 107.3 |
| 4.27 | 06/06/2013 | 106.6 |
| 4.27 | 06/06/2013 | 103.9 |
| 4.24 | 06/06/2013 | 107.5 |
| 4.29 | 06/06/2013 | 106.4 |
|      | 06/06/2013 | 103.5 |
|      | 06/06/2013 | 103.2 |
|      | 06/06/2013 | 107.7 |
|      | 06/06/2013 | 104.3 |
|      | 06/06/2013 | 107.0 |
|      | 06/06/2013 | 109.1 |
|      | 06/06/2013 | 107.4 |
|      | 06/06/2013 | 88.0  |
|      | 06/06/2013 | 107.3 |
|      | 06/06/2013 | 103.2 |
|      | 06/06/2013 | 108.3 |
|      | 06/06/2013 | 103.6 |
|      | 06/06/2013 | 104.9 |
|      | 06/06/2013 | 106.7 |
|      | 06/06/2013 | 112.2 |
|      | 06/06/2013 | 105.6 |
|      | 06/06/2013 | 99.5  |
|      | 06/06/2013 | 106.1 |
|      | 06/06/2013 | 111.6 |
| 4.25 | 06/06/2013 | 104.2 |
| 4.28 | 06/06/2013 | 106.0 |
| 4.24 | 06/06/2013 | 106.8 |
| 4.24 | 06/06/2013 | 106.0 |
| 4.16 | 06/06/2013 | 102.1 |
| 4.24 | 06/06/2013 | 102.9 |
| 4.29 | 06/06/2013 | 104.1 |
| 4.38 | 06/06/2013 | 103.6 |
| 4.16 | 06/06/2013 | 100.1 |
| 4.48 | 06/06/2013 | 102.5 |
| 4.13 | 06/06/2013 | 103.2 |
| 4.57 | 06/06/2013 | 100.0 |
|      | 06/06/2013 | 101.4 |
|      | 06/06/2013 | 99.9  |
|      | 06/06/2013 | 101.2 |
|      | 06/06/2013 | 102.2 |
|      | 06/06/2013 | 101.7 |
|      | 06/06/2013 | 99.1  |
|      | 06/06/2013 | 102.2 |
|      | 06/06/2013 | 90.4  |
|      | 06/06/2013 | 103.2 |
|      | 06/06/2013 | 102.9 |

|       |            |              |
|-------|------------|--------------|
|       | 06/06/2013 | <b>102.3</b> |
| 4.20  | 06/06/2013 | <b>105.2</b> |
| 4.24  | 06/06/2013 | <b>107.8</b> |
| 4.20  | 06/06/2013 | <b>104.7</b> |
| 4.38  | 06/06/2013 | <b>101.3</b> |
| 4.17  | 06/06/2013 | <b>99.1</b>  |
| 3.98  | 06/06/2013 | <b>101.1</b> |
| 4.00  | 06/06/2013 | <b>104.3</b> |
| 7.17  | 06/06/2013 | <b>107.4</b> |
| 7.19  | 06/06/2013 | <b>94.3</b>  |
| 7.20  | 06/06/2013 | <b>98.2</b>  |
| 5.55  | 18/06/2013 | <b>104.2</b> |
| 5.56  | 18/06/2013 | <b>104.7</b> |
| 5.57  | 18/06/2013 | <b>104.4</b> |
| 5.56  | 18/06/2013 | <b>104.6</b> |
| 5.55  | 18/06/2013 | <b>106.9</b> |
| 7.14  | 18/06/2013 | <b>105.8</b> |
| 7.09  | 18/06/2013 | <b>108.1</b> |
| 7.15  | 18/06/2013 | <b>106.6</b> |
| 7.11  | 18/06/2013 | <b>106.3</b> |
| 7.15  | 18/06/2013 | <b>104.8</b> |
|       | 18/06/2013 | <b>107.8</b> |
|       | 18/06/2013 | <b>108.1</b> |
|       | 18/06/2013 | <b>106.9</b> |
|       | 18/06/2013 | <b>111.3</b> |
|       | 18/06/2013 | <b>104.5</b> |
|       | 18/06/2013 | <b>106.9</b> |
|       | 18/06/2013 | <b>105.5</b> |
|       | 18/06/2013 | <b>106.3</b> |
|       | 18/06/2013 | <b>102.1</b> |
|       | 18/06/2013 | <b>108.2</b> |
|       | 18/06/2013 | <b>107.9</b> |
|       | 18/06/2013 | <b>101.5</b> |
|       | 18/06/2013 | <b>107.9</b> |
|       | 18/06/2013 | <b>114.9</b> |
|       | 18/06/2013 | <b>100.0</b> |
| 7.11  | 18/06/2013 | <b>108.7</b> |
|       | 18/06/2013 | <b>0.1</b>   |
| 3.80  | 18/06/2013 | <b>99.9</b>  |
|       | 26/09/2013 | <b>97.9</b>  |
| 4.14  | 25/06/2013 | <b>93.2</b>  |
| 4.16  | 25/06/2013 | <b>95.2</b>  |
| 4.27  | 25/06/2013 | <b>90.4</b>  |
| 4.17  | 25/06/2013 | <b>92.9</b>  |
| 4.27  | 25/06/2013 | <b>93.2</b>  |
|       | 25/06/2013 | <b>90.4</b>  |
| 10.43 | 25/06/2013 | <b>90.3</b>  |
| 10.45 | 25/06/2013 | <b>92.2</b>  |
| 10.43 | 25/06/2013 | <b>88.2</b>  |
| 10.43 | 25/06/2013 | <b>90.4</b>  |

|       |            |                |
|-------|------------|----------------|
| 10.58 | 25/06/2013 | 94.4           |
|       | 25/06/2013 | 95.3           |
|       | 25/06/2013 | 96.9           |
|       | 25/06/2013 | 92.3           |
|       | 25/06/2013 | 92.3           |
|       | 25/06/2013 | 98.1           |
|       | 25/06/2013 | 96.5           |
|       | 25/06/2013 | 96.8           |
|       | 25/06/2013 | 92.8           |
|       | 25/06/2013 | 95.2           |
|       | 25/06/2013 | 92.8           |
| 3.90  | 25/04/2013 | 93.5           |
| 3.46  | 25/04/2013 | 98.3           |
| 3.55  | 25/04/2013 | 92.6           |
| 3.62  | 25/04/2013 | 100.0          |
| 3.80  | 25/04/2013 | 96.3           |
| 3.57  | 25/04/2013 | 100.8          |
|       | 25/04/2013 | 94.6           |
|       | 25/04/2013 | Not detectable |
|       | 25/04/2013 | 94.2           |
|       | 25/04/2013 | 99.4           |
|       | 25/04/2013 | 105.6          |
|       | 25/04/2013 | 99.0           |
|       | 25/04/2013 | 97.6           |
|       | 25/04/2013 | 91.9           |
|       | 25/04/2013 | 97.3           |
|       | 25/04/2013 | 100.9          |
|       | 25/04/2013 | 98.0           |
|       | 25/04/2013 | 105.7          |
|       | 25/04/2013 | 99.9           |
|       | 25/04/2013 | 96.1           |
|       | 25/04/2013 | 103.3          |
|       | 25/04/2013 | 93.4           |
|       | 25/04/2013 | Not detectable |
|       | 25/04/2013 | 94.8           |
|       | 25/04/2013 | Not detectable |
|       | 25/04/2013 | 103.3          |
|       | 25/04/2013 | 98.7           |
|       | 25/04/2013 | 93.9           |
|       | 25/04/2013 | 107.9          |
|       | 25/04/2013 | 105.0          |
|       | 25/04/2013 | 105.7          |
|       | 25/04/2013 | 106.8          |
|       | 25/04/2013 | 106.1          |
|       | 25/04/2013 | Not detectable |
|       | 25/04/2013 | 111.4          |
|       | 25/04/2013 | 112.9          |
|       | 25/04/2013 | 102.2          |
|       | 25/04/2013 | 104.3          |
|       | 25/04/2013 | 105.3          |

|      |            |       |
|------|------------|-------|
|      | 25/04/2013 | 104.0 |
|      | 25/04/2013 | 99.0  |
|      | 25/04/2013 | 96.3  |
|      | 25/04/2013 | 108.1 |
|      | 25/04/2013 | 112.5 |
|      | 25/04/2013 | 97.0  |
|      | 25/04/2013 | 97.5  |
|      | 25/04/2013 | 97.2  |
|      | 25/04/2013 | 106.0 |
|      | 25/04/2013 | 97.1  |
|      | 25/04/2013 | 100.9 |
|      | 25/04/2013 | 111.4 |
|      | 25/04/2013 | 109.9 |
|      | 25/04/2013 | 106.0 |
|      | 25/04/2013 | 93.6  |
|      | 25/04/2013 | 96.6  |
|      | 25/04/2013 | 104.7 |
|      | 25/04/2013 | 90.3  |
|      | 25/04/2013 | 106.7 |
|      | 25/04/2013 | 99.5  |
|      | 25/04/2013 | 103.9 |
|      | 25/04/2013 | 104.3 |
|      | 25/04/2013 | 97.1  |
|      | 25/04/2013 | 94.7  |
|      | 25/04/2013 | 109.4 |
|      | 25/04/2013 | 100.0 |
|      | 25/04/2013 | 98.5  |
|      | 25/04/2013 | 102.9 |
|      | 25/04/2013 | 92.5  |
|      | 25/04/2013 | 94.8  |
|      | 25/04/2013 | 100.6 |
| 6.72 | 01/05/2013 | 98.0  |
| 6.81 | 01/05/2013 | 90.1  |
| 6.70 | 01/05/2013 | 90.7  |
| 6.70 | 01/05/2013 | 93.6  |
| 8.28 | 01/05/2013 | 96.6  |
| 7.22 | 01/05/2013 | 100.8 |
| 8.31 | 01/05/2013 | 96.4  |
| 8.29 | 01/05/2013 | 83.7  |
| 8.31 | 01/05/2013 | 95.3  |
| 8.25 | 01/05/2013 | 85.3  |
| 8.25 | 01/05/2013 | 87.3  |
| 5.23 | 30/04/2013 | 104.3 |
| 5.10 | 30/04/2013 | 93.9  |
| 5.27 | 30/04/2013 | 95.7  |
| 5.06 | 30/04/2013 | 90.4  |
| 5.07 | 30/04/2013 | 95.4  |
|      | 30/04/2013 | 101.7 |
|      | 30/04/2013 | 104.3 |
|      | 30/04/2013 | 90.5  |

|      |            |       |
|------|------------|-------|
|      | 30/04/2013 | 95.1  |
|      | 30/04/2013 | 90.4  |
|      | 30/04/2013 | 96.1  |
|      | 30/04/2013 | 99.4  |
|      | 30/04/2013 | 98.6  |
|      | 30/04/2013 | 90.3  |
|      | 30/04/2013 | 95.8  |
|      | 30/04/2013 | 100.9 |
|      | 30/04/2013 | 102.1 |
|      | 30/04/2013 | 102.7 |
|      | 30/04/2013 | 100.5 |
|      | 30/04/2013 | 99.6  |
|      | 30/04/2013 | 101.7 |
|      | 30/04/2013 | 103.1 |
|      | 30/04/2013 | 102.3 |
|      | 30/04/2013 | 103.1 |
|      | 30/04/2013 | 104.4 |
|      | 30/04/2013 | 103.8 |
|      | 30/04/2013 | 103.3 |
|      | 30/04/2013 | 104.2 |
|      | 30/04/2013 | 99.2  |
|      | 30/04/2013 | 104.8 |
|      | 30/04/2013 | 109.9 |
|      | 30/04/2013 | 105.2 |
|      | 30/04/2013 | 98.5  |
|      | 30/04/2013 | 103.0 |
|      | 30/04/2013 | 106.3 |
|      | 30/04/2013 | 102.6 |
|      | 30/04/2013 | 106.9 |
|      | 30/04/2013 | 102.0 |
|      | 30/04/2013 | 103.5 |
|      | 30/04/2013 | 109.7 |
|      | 30/04/2013 | 104.7 |
|      | 30/04/2013 | 104.2 |
|      | 30/04/2013 | 107.4 |
|      | 30/04/2013 | 107.9 |
|      | 30/04/2013 | 109.7 |
|      | 30/04/2013 | 102.6 |
|      | 30/04/2013 | 102.2 |
| 4.69 | 01/05/2013 | 89.5  |
| 8.18 | 01/05/2013 | 98.1  |
| 8.20 | 01/05/2013 | 99.9  |
| 8.22 | 01/05/2013 | 98.3  |
| 8.18 | 01/05/2013 | 93.5  |
| 6.5  | 17/05/2013 | 86.8  |
| 8.81 | 17/05/2013 | 67.0  |
| 8.94 | 17/05/2013 | 104.2 |
|      | 17/05/2013 | 102.2 |
|      | 01/08/2013 | 80.3  |
|      |            | 90.6  |

|     |            |              |
|-----|------------|--------------|
|     | 01/08/2013 | <b>79.0</b>  |
| CDC |            | <b>79.5</b>  |
|     | 01/08/2013 | <b>83.2</b>  |
| CDC |            | <b>52.8</b>  |
|     | 01/08/2013 | <b>90.5</b>  |
|     | 01/08/2013 | <b>103.3</b> |
| CDC |            | <b>80.7</b>  |
|     | 01/08/2013 | <b>100.8</b> |
|     | 01/08/2013 | <b>93.8</b>  |
| CDC |            | <b>113</b>   |
|     | 01/08/2013 | <b>88.0</b>  |
|     | 01/08/2013 | <b>90.9</b>  |
|     | 01/08/2013 | <b>99.3</b>  |
| CDC |            | <b>116.7</b> |
|     | 01/08/2013 | <b>97.3</b>  |
| CDC |            | <b>111.8</b> |
|     | 01/08/2013 | <b>90.2</b>  |
| CDC |            | <b>89</b>    |
|     | 01/08/2013 | <b>92.1</b>  |
|     | 01/08/2013 | <b>97.3</b>  |
| CDC |            | <b>101.4</b> |
|     | 01/08/2013 | <b>88.9</b>  |
| CDC |            | <b>90.2</b>  |
|     | 01/08/2013 | <b>91.7</b>  |
| CDC |            | <b>94.5</b>  |
|     | 01/08/2013 | <b>101.5</b> |
| CDC |            | <b>100.3</b> |
|     | 01/08/2013 | <b>93.5</b>  |
|     | 01/08/2013 | <b>97.6</b>  |
|     | 01/08/2013 | <b>79.7</b>  |
|     | 01/08/2013 | <b>96.2</b>  |
| CDC |            | <b>106.8</b> |
|     | 01/08/2013 | <b>98.3</b>  |
| CDC |            | <b>104.4</b> |
|     | 01/08/2013 | <b>52.7</b>  |
|     | 01/08/2013 | <b>75.5</b>  |
|     | 01/08/2013 | <b>80.9</b>  |
| CDC |            | <b>134.7</b> |
|     | 01/08/2013 | <b>69</b>    |
| CDC |            | <b>122.4</b> |
|     | 01/08/2013 | <b>67.6</b>  |
|     | 01/08/2013 | <b>95.4</b>  |
|     | 01/08/2013 | <b>98.2</b>  |
|     | 02/08/2013 | <b>89.3</b>  |
|     | 02/08/2013 | <b>92.4</b>  |
| CDC |            | <b>104.5</b> |
|     | 02/08/2013 | <b>89.4</b>  |
| CDC |            | <b>94.5</b>  |
|     | 02/08/2013 | <b>85.4</b>  |
| CDC |            | <b>97.4</b>  |

|     |            |              |
|-----|------------|--------------|
|     | 02/08/2013 | <b>90.3</b>  |
| CDC |            | <b>108.7</b> |
|     | 02/08/2013 | <b>93.3</b>  |
|     | 02/08/2013 | <b>93.7</b>  |
|     | 02/08/2013 | <b>74.5</b>  |
| CDC |            | <b>95.2</b>  |
|     | 02/08/2013 | <b>98.4</b>  |
|     | 02/08/2013 | <b>106.5</b> |
| CDC |            | <b>110.6</b> |
|     | 02/08/2013 | <b>91.8</b>  |
| CDC |            | <b>101.5</b> |
|     | 02/08/2013 | <b>88.9</b>  |
| CDC |            | <b>95.4</b>  |
|     | 02/08/2013 | <b>89.8</b>  |
| CDC |            | <b>102.0</b> |
|     | 02/08/2013 | <b>93.8</b>  |
| CDC |            | <b>96.9</b>  |
|     | 02/08/2013 | <b>98.8</b>  |
| CDC |            | <b>111.6</b> |
|     | 02/08/2013 | <b>99.4</b>  |
| CDC |            | <b>101.6</b> |
|     | 02/08/2013 | <b>86.1</b>  |
| CDC |            | <b>99.0</b>  |
|     | 02/08/2013 | <b>107.3</b> |
| CDC |            | <b>109.7</b> |
|     | 02/08/2013 | <b>92.0</b>  |
| CDC |            | <b>95.7</b>  |
|     | 02/08/2013 | <b>97.6</b>  |
|     | 02/08/2013 | <b>100.7</b> |
|     | 06/06/2013 | <b>72.0</b>  |
|     | 06/06/2013 | <b>58.1</b>  |
|     | 06/06/2013 | <b>80.1</b>  |
|     | 06/06/2013 | <b>79.9</b>  |
|     | 06/06/2013 | <b>109.2</b> |
|     | 06/06/2013 | <b>83.8</b>  |
|     | 06/06/2013 | <b>92.7</b>  |
|     | 06/06/2013 | <b>107.6</b> |
|     | 06/06/2013 | <b>85.4</b>  |
|     | 06/06/2013 | <b>78.5</b>  |
|     | 06/06/2013 | <b>67.3</b>  |
|     | 06/06/2013 | <b>108.6</b> |
|     | 28/06/2013 | <b>101.5</b> |
| CDC |            | <b>92.5</b>  |
|     | 28/06/2013 | <b>97.8</b>  |
| CDC |            | <b>105.0</b> |
|     | 28/06/2013 | <b>98.3</b>  |
| CDC |            | <b>110.0</b> |
|     | 28/06/2013 | <b>87.6</b>  |
| CDC |            | <b>103.0</b> |
|     | 28/06/2013 | <b>98.0</b>  |

|     |            |              |
|-----|------------|--------------|
| CDC |            | <b>109.5</b> |
|     | 28/06/2013 | <b>102.9</b> |
| CDC |            | <b>115.0</b> |
|     | 28/06/2013 | <b>104.7</b> |
| CDC |            | <b>99.5</b>  |
|     | 28/06/2013 | <b>101.1</b> |
| CDC |            | <b>103.5</b> |
|     | 28/06/2013 | <b>101.7</b> |
| CDC |            | <b>98.5</b>  |
|     | 28/06/2013 | <b>103.8</b> |
|     | 16/08/2013 | <b>92.9</b>  |
|     | 16/08/2013 | <b>74.5</b>  |
|     | 16/08/2013 | <b>84.1</b>  |
| CDC |            | <b>65.9</b>  |
|     | 16/08/2013 | <b>82.3</b>  |
|     | 16/08/2013 | <b>60.6</b>  |
| CDC |            | <b>73.9</b>  |
|     | 16/08/2013 | <b>84</b>    |
| CDC |            | <b>64.4</b>  |
|     | 16/08/2013 | <b>92.6</b>  |
| CDC |            | <b>72.1</b>  |
|     | 16/08/2013 | <b>79.8</b>  |
|     | 16/08/2013 | <b>90.8</b>  |
|     | 16/08/2013 | <b>81.2</b>  |
| CDC |            | <b>70.8</b>  |
|     | 16/08/2013 | <b>76</b>    |
| CDC |            | <b>67</b>    |
|     | 16/08/2013 | <b>110.3</b> |
|     | 16/08/2013 | <b>61.9</b>  |
| CDC |            | <b>67.6</b>  |
|     | 16/08/2013 | <b>93.3</b>  |
| CDC |            | <b>73.9</b>  |
|     | 16/08/2013 | <b>98.5</b>  |
| CDC |            | <b>63.1</b>  |





























|       |              |     |
|-------|--------------|-----|
| 96.7  | lumefantrine | 120 |
|       | lumefantrine | 120 |
|       | lumefantrine | 120 |
|       | lumefantrine | 120 |
|       | lumefantrine | 120 |
|       | lumefantrine | 120 |
|       | lumefantrine | 120 |
|       | lumefantrine | 120 |
| 94.1  | lumefantrine | 120 |
|       | lumefantrine | 120 |
|       | lumefantrine | 120 |
| 128.0 | lumefantrine | 120 |
|       | lumefantrine | 120 |
|       | lumefantrine | 120 |
|       | lumefantrine | 120 |
|       | lumefantrine | 120 |
|       | lumefantrine | 120 |
| 102.3 | lumefantrine | 120 |
|       | lumefantrine | 120 |
|       | lumefantrine | 120 |
|       | lumefantrine | 120 |
|       | lumefantrine | 120 |
|       | lumefantrine | 120 |
| 105.2 | lumefantrine | 120 |
|       | lumefantrine | 120 |
|       | lumefantrine | 120 |
|       | lumefantrine | 120 |
|       | lumefantrine | 120 |
|       | lumefantrine | 120 |
| 104.0 | lumefantrine | 120 |
|       | lumefantrine | 120 |
|       | lumefantrine | 120 |
|       | lumefantrine | 120 |
| 102.6 | lumefantrine | 120 |
|       | lumefantrine | 120 |
| 104.9 | lumefantrine | 120 |
|       | lumefantrine | 120 |
|       | lumefantrine | 120 |
|       | lumefantrine | 120 |
|       | lumefantrine | 120 |
|       | lumefantrine | 120 |
| 101.8 | lumefantrine | 120 |
|       | lumefantrine | 120 |
| 111.5 | lumefantrine | 120 |
|       | lumefantrine | 120 |
|       | lumefantrine | 120 |
|       | lumefantrine | 120 |
|       | lumefantrine | 120 |
|       | lumefantrine | 120 |
|       | lumefantrine | 120 |





















|               |              |      |     |
|---------------|--------------|------|-----|
|               | lumefantrine | 480  |     |
| 103.5         | lumefantrine | 480  |     |
|               | lumefantrine | 480  |     |
|               | lumefantrine | 480  |     |
| lot detectabl | lumefantrine | 480  |     |
|               | lumefantrine | 480  |     |
|               | lumefantrine | 480  |     |
|               | lumefantrine | 480  |     |
|               | lumefantrine | 480  |     |
|               | lumefantrine | 480  |     |
|               | lumefantrine | 480  |     |
|               | lumefantrine | 480  |     |
|               | lumefantrine | 480  |     |
|               | lumefantrine | 480  |     |
| 98.0          | lumefantrine | 480  |     |
|               | lumefantrine | 480  |     |
|               | lumefantrine |      | 120 |
|               | lumefantrine | 480  |     |
|               | lumefantrine | 480  |     |
|               | lumefantrine | 480  |     |
|               | lumefantrine | 480  |     |
|               | lumefantrine | 480  |     |
|               | lumefantrine | 480  |     |
|               | lumefantrine | 480  |     |
|               | lumefantrine | 480  |     |
|               | lumefantrine | 480  |     |
|               | lumefantrine | 480  |     |
|               | lumefantrine | 480  |     |
|               | lumefantrine | 480  |     |
| 107.9         | lumefantrine | 480  |     |
| 116.5         | lumefantrine | 480  |     |
|               | lumefantrine | 480  |     |
|               | lumefantrine | 480  |     |
|               | lumefantrine | 480  |     |
|               | lumefantrine | 480  |     |
|               | lumefantrine | 480  |     |
|               | lumefantrine | 480  |     |
|               | lumefantrine | 480  |     |
|               | lumefantrine | 480  |     |
|               | lumefantrine | 480  |     |
|               | lumefantrine | 480  |     |
|               | lumefantrine | 480  |     |
|               | lumefantrine | 480  |     |
|               | lumefantrine | 480  |     |
|               | lumefantrine | 1080 |     |
|               | lumefantrine | 480  |     |
| 91.4          | lumefantrine | 1080 |     |
|               | lumefantrine | 480  |     |
|               | lumefantrine | 480  |     |
|               | lumefantrine | 480  |     |





|       |              |     |
|-------|--------------|-----|
|       | lumefantrine | 480 |
|       | lumefantrine | 480 |
|       | lumefantrine | 480 |
|       | lumefantrine | 480 |
|       | lumefantrine | 480 |
|       | lumefantrine | 480 |
|       | lumefantrine | 480 |
| 104.1 | lumefantrine | 480 |
|       | lumefantrine | 480 |
|       | lumefantrine | 480 |
|       | lumefantrine | 480 |
|       | lumefantrine | 480 |
|       | lumefantrine | 480 |

96.0

89.0

92.0

lot detectabl

96.0

88.0

94.0

91.0

93.0

|      |             |      |        |      |      |
|------|-------------|------|--------|------|------|
|      | amodiaquine | 67.5 |        |      |      |
|      | amodiaquine | 67.5 |        |      |      |
|      | amodiaquine | 135  |        |      |      |
|      | amodiaquine | 135  |        |      |      |
|      | amodiaquine | 135  |        |      |      |
|      | amodiaquine | 135  |        |      |      |
|      | amodiaquine | 135  |        |      |      |
|      | amodiaquine | 135  |        |      |      |
|      | amodiaquine | 135  |        |      |      |
|      | amodiaquine | 135  |        |      |      |
|      | amodiaquine | 135  |        |      |      |
|      | amodiaquine | 135  |        |      |      |
|      | amodiaquine | 135  |        |      |      |
| 87.0 | amodiaquine | 135  |        |      |      |
|      | amodiaquine | 135  |        |      |      |
| 89.0 | amodiaquine | 135  |        |      |      |
|      | amodiaquine | 135  |        |      |      |
|      | amodiaquine | 135  |        |      |      |
|      | amodiaquine | 135  |        |      |      |
|      | amodiaquine | 135  |        |      |      |
|      | amodiaquine | 135  |        |      |      |
|      | amodiaquine | 135  |        |      |      |
|      | amodiaquine | 135  |        |      |      |
| 93.0 | amodiaquine | 135  |        |      |      |
|      | amodiaquine | 135  |        |      |      |
|      | amodiaquine | 135  |        |      |      |
|      | amodiaquine | 150  | 0.2499 | 9.16 | 4.34 |
|      | amodiaquine | 150  | 0.2552 | 9.19 | 4.15 |
|      | amodiaquine | 150  | 0.2644 | 9.17 | 3.68 |
|      | amodiaquine | 150  | 0.2704 | 9.08 | 3.56 |
|      | amodiaquine | 150  | 0.2702 | 9.09 | 3.55 |
|      | amodiaquine | 150  | 0.2633 | 9.1  | 3.51 |
|      | amodiaquine | 150  | 0.2654 | 9.07 | 3.56 |
| 84.0 | amodiaquine | 150  |        |      |      |
| 90.0 | amodiaquine | 150  |        |      |      |
|      | amodiaquine | 150  |        |      |      |
|      | amodiaquine | 150  |        |      |      |
|      | amodiaquine | 150  |        |      |      |
|      | amodiaquine | 150  |        |      |      |
|      | amodiaquine | 150  |        |      |      |
|      | amodiaquine | 150  |        |      |      |
|      | amodiaquine | 150  |        |      |      |
| 87.0 | amodiaquine | 150  | 0.2674 | 9.19 | 3.7  |
|      | amodiaquine | 150  | 0.2677 | 9.07 | 3.51 |
|      | amodiaquine | 150  | 0.2691 | 9.09 | 3.53 |





|      |             |       |     |        |       |      |
|------|-------------|-------|-----|--------|-------|------|
| 90.0 | amodiaquine |       | 300 | 0.5079 | 12.63 | 4.67 |
|      | amodiaquine |       | 300 |        |       |      |
|      | amodiaquine |       | 300 |        |       |      |
|      | amodiaquine |       | 300 |        |       |      |
|      | amodiaquine |       | 300 |        |       |      |
|      | amodiaquine |       | 300 |        |       |      |
| 92.0 | amodiaquine |       | 300 |        |       |      |
| 81.0 | amodiaquine | 300   |     |        |       |      |
|      | amodiaquine |       | 300 |        |       |      |
|      | amodiaquine |       | 300 |        |       |      |
|      | amodiaquine | 300   |     |        |       |      |
|      | amodiaquine |       | 300 |        |       |      |
|      | amodiaquine | 300   |     |        |       |      |
|      | amodiaquine |       | 300 |        |       |      |
|      | amodiaquine |       | 300 |        |       |      |
|      | amodiaquine |       | 300 |        |       |      |
|      | amodiaquine |       | 300 |        |       |      |
|      | amodiaquine | 300   |     |        |       |      |
|      | amodiaquine |       | 300 |        |       |      |
|      | amodiaquine |       | 300 | 0.5086 | 12.68 | 4.74 |
|      | amodiaquine | 300   |     | 0.4956 | 12.69 | 4.91 |
|      | amodiaquine | 300   |     | 0.5005 | 12.63 | 4.66 |
|      | amodiaquine |       | 300 | 0.514  | 12.7  | 4.76 |
|      | amodiaquine | 300   |     | 0.5077 | 12.7  | 4.76 |
|      | amodiaquine |       | 300 |        |       |      |
|      | amodiaquine |       | 300 |        |       |      |
|      | amodiaquine |       | 300 |        |       |      |
|      | amodiaquine |       | 300 |        |       |      |
|      | amodiaquine | 300   |     |        |       |      |
|      | amodiaquine |       | 300 |        |       |      |
|      | amodiaquine |       | 300 |        |       |      |
|      | amodiaquine | 300   |     |        |       |      |
|      | amodiaquine |       | 300 |        |       |      |
|      | amodiaquine |       | 300 |        |       |      |
|      | amodiaquine | 300   |     |        |       |      |
|      | amodiaquine |       | 300 |        |       |      |
|      | amodiaquine |       | 300 |        |       |      |
|      | amodiaquine | 300   |     |        |       |      |
| 89.0 | amodiaquine |       | 300 |        |       |      |
| 90.0 | amodiaquine |       | 300 |        |       |      |
| 91.0 | amodiaquine |       | 300 |        |       |      |
|      | amodiaquine | 300   |     |        |       |      |
| 91.0 | amodiaquine |       | 300 |        |       |      |
|      | amodiaquine | 300   |     |        |       |      |
| 89.0 | amodiaquine | 300   |     |        |       |      |
|      | amodiaquine | 300   |     |        |       |      |
|      | amodiaquine | 300   |     |        |       |      |
|      | amodiaquine | 306.3 |     |        |       |      |
|      | amodiaquine |       | 600 |        |       |      |
|      | amodiaquine | 600   |     | 0.861  | 19.18 | 9.1  |

|      |             |     |     |        |       |      |
|------|-------------|-----|-----|--------|-------|------|
|      | amodiaquine |     | 600 |        |       |      |
|      | amodiaquine |     | 75  | 0.512  |       |      |
|      | amodiaquine |     | 75  | 0.5136 |       |      |
|      | amodiaquine |     | 75  | 0.4903 |       |      |
|      | amodiaquine |     | 75  | 0.5036 |       |      |
|      | amodiaquine |     | 75  | 0.4689 |       |      |
|      | amodiaquine |     | 75  | 0.5193 |       |      |
|      | amodiaquine |     | 75  | 0.501  |       |      |
|      | amodiaquine |     | 75  |        |       |      |
|      | amodiaquine |     | 75  |        |       |      |
|      | amodiaquine |     | 75  |        |       |      |
|      | amodiaquine | 150 |     | 0.9547 |       |      |
|      | amodiaquine | 150 |     | 0.9848 |       |      |
|      | amodiaquine |     | 150 | 1.0268 |       |      |
|      | amodiaquine | 150 |     | 0.9882 |       |      |
|      | amodiaquine |     | 150 | 0.9918 |       |      |
|      | amodiaquine | 150 |     |        |       |      |
|      | amodiaquine | 150 |     |        |       |      |
|      | amodiaquine | 150 |     |        |       |      |
|      | amodiaquine | 150 |     |        |       |      |
|      | amodiaquine |     | 150 |        |       |      |
|      | amodiaquine |     | 150 |        |       |      |
|      | amodiaquine |     | 150 |        |       |      |
|      | amodiaquine | 150 |     |        |       |      |
|      | amodiaquine |     | 150 |        |       |      |
|      | amodiaquine |     | 150 |        |       |      |
|      | amodiaquine | 150 |     |        |       |      |
|      | amodiaquine | 150 |     |        |       |      |
|      | amodiaquine |     | 150 |        |       |      |
|      | amodiaquine | 150 |     |        |       |      |
|      | amodiaquine | 150 |     |        |       |      |
|      | amodiaquine |     | 150 |        |       |      |
|      | amodiaquine | 150 |     |        |       |      |
|      | amodiaquine | 150 |     |        |       |      |
|      | amodiaquine |     | 150 |        |       |      |
|      | amodiaquine | 150 |     |        |       |      |
|      | amodiaquine |     | 150 |        |       |      |
|      | amodiaquine | 150 |     |        |       |      |
|      | amodiaquine |     | 150 |        |       |      |
|      | amodiaquine | 150 |     |        |       |      |
|      | amodiaquine |     | 150 |        |       |      |
| 93.0 | mefloquine  | 125 |     | 0.265  | 9.59  | 4.1  |
|      | mefloquine  | 125 |     | 0.2701 | 9.57  | 4.14 |
| 96.0 | mefloquine  | 125 |     | 0.2683 | 9.59  | 4.18 |
| 94.0 | mefloquine  | 125 |     | 0.2683 | 9.56  | 4.14 |
|      | mefloquine  | 125 |     | 0.2707 | 9.6   | 4.05 |
|      | mefloquine  | 125 |     |        |       |      |
|      | mefloquine  | 125 |     |        |       |      |
|      | mefloquine  | 125 |     |        |       |      |
| 77.0 | mefloquine  | 250 |     | 0.5091 | 12.2  | 4.86 |
|      | mefloquine  | 250 |     | 0.5288 | 12.32 | 5.07 |
|      | mefloquine  | 250 |     | 0.5184 | 12.23 | 4.99 |
|      | mefloquine  | 250 |     | 0.5451 | 12.11 | 4.36 |
|      | mefloquine  | 250 |     | 0.5398 | 12.1  | 4.71 |





|                     |     |
|---------------------|-----|
| sulfamethoxyprazine | 250 |
| sulfamethoxyprazine | 250 |
| sulfamethoxyprazine | 250 |
| piperaquine         | 225 |
| sulfamethoxyprazine | 500 |
| sulfamethoxyprazine | 500 |
| sulfamethoxyprazine | 500 |
| sulfamethoxyprazine | 500 |
| sulfamethoxyprazine | 500 |
| sulfamethoxyprazine | 500 |
| sulfamethoxyprazine | 500 |
| sulfamethoxyprazine | 500 |
| sulfamethoxyprazine | 500 |
| sulfamethoxyprazine | 500 |
| sulfamethoxyprazine | 500 |
| sulfamethoxyprazine | 500 |
| sulfamethoxyprazine | 500 |
| sulfamethoxyprazine | 500 |
| sulfamethoxyprazine | 500 |
| sulfamethoxyprazine | 500 |
| sulfamethoxyprazine | 500 |
| sulfamethoxyprazine | 500 |
| sulfamethoxyprazine | 500 |
| sulfamethoxyprazine | 250 |
| sulfamethoxyprazine | 500 |

80.9

|      |             |     |        |       |      |
|------|-------------|-----|--------|-------|------|
|      | amodiaquine | 300 | 0.4941 | 12.69 | 4.86 |
|      | amodiaquine | 300 | 0.4908 | 12.71 | 4.84 |
|      | amodiaquine | 300 | 0.5034 | 12.69 | 4.84 |
|      | piperaquine | 225 |        |       |      |
|      | piperaquine | 225 |        |       |      |
|      | piperaquine | 225 |        |       |      |
|      | piperaquine | 225 |        |       |      |
|      | piperaquine | 225 |        |       |      |
|      | piperaquine | 225 |        |       |      |
|      | piperaquine | 225 |        |       |      |
|      | piperaquine | 225 |        |       |      |
|      | piperaquine | 225 |        |       |      |
|      | piperaquine | 225 |        |       |      |
| 88.2 | piperaquine | 225 |        |       |      |



|                      |             |     |
|----------------------|-------------|-----|
| 91.6                 | piperaquine | 225 |
|                      | piperaquine | 225 |
|                      | piperaquine | 225 |
|                      | piperaquine | 225 |
|                      | piperaquine | 225 |
| <b>lot detectabl</b> | piperaquine | 225 |
| 93.2                 | piperaquine | 225 |
|                      | piperaquine | 225 |
|                      | piperaquine | 225 |
|                      | piperaquine | 225 |
| 88.6                 | piperaquine | 225 |
| <b>lot detectabl</b> | piperaquine | 225 |
|                      | piperaquine | 225 |
|                      | piperaquine | 225 |
|                      | piperaquine | 225 |
|                      | piperaquine | 225 |
| 94.2                 | piperaquine | 225 |
|                      | piperaquine | 225 |
|                      | piperaquine | 225 |
|                      | piperaquine | 225 |
|                      | piperaquine | 225 |
|                      | piperaquine | 225 |
|                      | piperaquine | 225 |
|                      | piperaquine | 225 |
|                      | piperaquine | 225 |
|                      | piperaquine | 225 |
| <b>lot detectabl</b> | piperaquine | 225 |
|                      | piperaquine | 225 |
|                      | piperaquine | 225 |
|                      | piperaquine | 225 |
|                      | piperaquine | 225 |
|                      | piperaquine | 225 |
|                      | piperaquine | 225 |
|                      | piperaquine | 225 |
|                      | piperaquine | 225 |
| 85.7                 | piperaquine | 225 |
|                      | piperaquine | 225 |
|                      | piperaquine | 225 |
|                      | piperaquine | 225 |
|                      | piperaquine | 225 |
|                      | piperaquine | 225 |
|                      | piperaquine | 225 |
|                      | piperaquine | 225 |
|                      | piperaquine | 225 |
| 83.7                 | piperaquine | 225 |
|                      | piperaquine | 225 |
|                      | piperaquine | 225 |
|                      | piperaquine | 225 |
|                      | piperaquine | 225 |
| 95.1                 | piperaquine | 225 |
|                      | piperaquine | 225 |
|                      | piperaquine | 225 |
|                      | piperaquine | 225 |



|       |             |     |     |
|-------|-------------|-----|-----|
|       | piperaquine | 320 |     |
| 109.2 | piperaquine |     | 320 |
|       | piperaquine | 320 |     |
|       | piperaquine | 320 |     |
|       | piperaquine | 320 |     |
|       | piperaquine | 320 |     |
|       | piperaquine | 320 |     |
|       | piperaquine | 320 |     |
|       | piperaquine | 320 |     |
|       | piperaquine | 320 |     |
|       | piperaquine | 320 |     |
|       | piperaquine | 320 |     |
| 103.0 | piperaquine | 320 |     |
|       | piperaquine | 320 |     |
|       | piperaquine | 320 |     |
|       | piperaquine | 320 |     |
|       | piperaquine | 320 |     |
|       | piperaquine | 320 |     |
|       | piperaquine | 320 |     |
|       | piperaquine | 320 |     |
|       | piperaquine | 320 |     |
|       | piperaquine | 320 |     |
|       | piperaquine | 320 |     |
|       | piperaquine | 320 |     |
|       | piperaquine | 320 |     |
|       | piperaquine | 320 |     |
|       | piperaquine | 320 |     |
|       | piperaquine | 320 |     |
|       | piperaquine | 320 |     |
|       | piperaquine | 320 |     |
|       | piperaquine | 320 |     |
| 102.7 | piperaquine | 320 |     |
|       | piperaquine | 320 |     |
|       | piperaquine | 320 |     |
|       | piperaquine | 320 |     |
|       | piperaquine | 320 |     |
|       | piperaquine | 320 |     |
|       | piperaquine | 320 |     |
|       | piperaquine | 320 |     |
| 83.0  | piperaquine | 320 |     |
| 74.4  | piperaquine | 320 |     |
|       | piperaquine | 320 |     |
|       | piperaquine | 320 |     |
|       | piperaquine | 320 |     |
|       | piperaquine | 320 |     |
| 92.7  | piperaquine | 320 |     |



|      |              |      |      |
|------|--------------|------|------|
| 65.5 | piperaquine  | 320  |      |
|      | piperaquine  |      | 320  |
|      | piperaquine  | 320  |      |
|      | piperaquine  | 320  |      |
|      | piperaquine  | 320  |      |
|      | piperaquine  | 320  |      |
|      | piperaquine  | 320  |      |
|      | piperaquine  | 320  |      |
| 89.5 | piperaquine  | 320  |      |
|      | piperaquine  | 320  |      |
|      | piperaquine  | 320  |      |
|      | piperaquine  | 320  |      |
|      | piperaquine  | 320  |      |
|      | piperaquine  | 320  |      |
|      | piperaquine  | 320  |      |
|      | piperaquine  | 320  |      |
|      | piperaquine  | 320  |      |
|      | piperaquine  | 320  |      |
|      | lumefantrine |      | 1080 |
| CDC  | lumefantrine |      | 1080 |
|      | lumefantrine |      | 1080 |
|      | lumefantrine |      | 1080 |
|      | lumefantrine |      | 1080 |
|      | lumefantrine |      | 1080 |
|      | lumefantrine |      | 1080 |
| CDC  | lumefantrine |      | 1080 |
|      | lumefantrine |      | 1080 |
|      | lumefantrine | 1080 |      |
|      | lumefantrine | 1080 |      |
| CDC  | lumefantrine | 1080 |      |
| CDC  | lumefantrine | 1080 |      |
|      | lumefantrine | 1080 |      |
|      | lumefantrine | 1080 |      |
|      | lumefantrine | 1080 |      |
|      | lumefantrine | 1080 |      |
| CDC  | lumefantrine | 1080 |      |
| CDC  | lumefantrine | 1080 |      |
|      | lumefantrine | 1080 |      |
| CDC  | lumefantrine | 1080 |      |
| CDC  | lumefantrine | 1080 |      |
|      | lumefantrine | 1080 |      |
|      | lumefantrine | 1080 |      |
|      | lumefantrine | 1080 |      |
|      | lumefantrine | 1080 |      |
| CDC  | lumefantrine | 1080 |      |
| CDC  | lumefantrine | 1080 |      |





|     |              |      |       |
|-----|--------------|------|-------|
| CDC | lumefantrine | 1440 |       |
| CDC | lumefantrine | 1440 |       |
| CDC | lumefantrine | 1440 |       |
| CDC | lumefantrine | 1440 |       |
| CDC | lumefantrine | 1440 |       |
| CDC | lumefantrine | 1440 |       |
| CDC | lumefantrine | 1440 |       |
|     | lumefantrine | 1440 |       |
|     | lumefantrine | 1440 |       |
|     | lumefantrine | 1440 |       |
|     | lumefantrine | 1440 |       |
| CDC | lumefantrine | 1440 |       |
| CDC | lumefantrine |      | 1440  |
|     | lumefantrine | 240  |       |
|     | lumefantrine | 240  |       |
|     | lumefantrine | 240  |       |
|     | lumefantrine | 240  |       |
|     | lumefantrine | 240  |       |
|     | lumefantrine | 480  |       |
|     | lumefantrine | 240  |       |
|     | lumefantrine | 240  |       |
|     | lumefantrine | 120  |       |
|     | lumefantrine | 120  |       |
|     | lumefantrine | 120  |       |
| CDC |              |      |       |
| CDC |              |      |       |
| CDC |              |      |       |
| CDC |              |      |       |
| CDC |              |      |       |
| CDC |              |      |       |
| CDC |              |      |       |
| CDC |              |      |       |
| CDC |              |      |       |
| CDC | amodiaquine  |      | 612.4 |
|     | amodiaquine  |      | 612.4 |
|     | piperaquine  | 640  |       |
|     | piperaquine  | 640  |       |
|     | piperaquine  | 640  |       |
| CDC | piperaquine  | 640  |       |
|     | piperaquine  | 640  |       |
|     | piperaquine  | 640  |       |
| CDC | piperaquine  | 640  |       |
|     | piperaquine  | 640  |       |























|       |              |     |
|-------|--------------|-----|
|       | lumefantrine | 480 |
|       | lumefantrine | 480 |
|       | lumefantrine | 480 |
|       | lumefantrine | 480 |
|       | lumefantrine | 480 |
|       | lumefantrine | 480 |
|       | lumefantrine | 480 |
|       | lumefantrine | 480 |
| 97.4  | lumefantrine | 480 |
|       | lumefantrine | 480 |
|       | lumefantrine | 480 |
|       | lumefantrine | 480 |
|       | lumefantrine | 480 |
|       | lumefantrine | 480 |
|       | lumefantrine | 480 |
|       | lumefantrine | 480 |
|       | lumefantrine | 480 |
|       | lumefantrine | 480 |
|       | lumefantrine | 480 |
|       | lumefantrine | 480 |
| 98.0  | lumefantrine | 480 |
|       | lumefantrine | 480 |
| 97.0  | lumefantrine | 480 |
|       | lumefantrine | 480 |
|       | lumefantrine | 480 |
|       | lumefantrine | 480 |
|       | lumefantrine | 480 |
|       | lumefantrine | 480 |
|       | lumefantrine | 480 |
| 101.3 | lumefantrine | 480 |
|       | lumefantrine | 480 |
| 101.6 | lumefantrine | 480 |
|       | lumefantrine | 480 |
|       | lumefantrine | 480 |
|       | lumefantrine | 480 |
|       | lumefantrine | 480 |
|       | lumefantrine | 480 |
| 87.7  | lumefantrine | 480 |
| 88.5  | lumefantrine | 480 |
|       | lumefantrine | 480 |
|       | lumefantrine | 480 |
|       | lumefantrine | 480 |
|       | lumefantrine | 480 |
|       | lumefantrine | 480 |
|       | lumefantrine | 480 |
|       | lumefantrine | 480 |
|       | lumefantrine | 480 |
| 93.6  | lumefantrine | 480 |
|       | lumefantrine | 480 |





|      |                     |     |        |       |      |
|------|---------------------|-----|--------|-------|------|
|      | amodiaquine         | 300 |        |       |      |
|      | amodiaquine         | 300 | 0.5094 | 12.59 | 4.87 |
|      | amodiaquine         | 300 | 0.5062 | 12.56 | 4.83 |
|      | amodiaquine         | 300 | 0.5166 | 12.58 | 4.92 |
|      | amodiaquine         | 300 | 0.5036 | 12.65 | 4.67 |
|      | amodiaquine         | 300 | 0.5211 | 12.56 | 4.88 |
|      | amodiaquine         | 300 | 0.568  | 18.42 | 8.13 |
|      | amodiaquine         | 300 | 0.5802 | 18.34 | 8.12 |
|      | amodiaquine         | 780 | 0.8553 | 19.12 | 9.08 |
| 93.0 | amodiaquine         | 780 | 0.8614 | 19.12 | 9.07 |
| 90.0 | amodiaquine         | 780 | 0.8549 | 19.13 | 9.08 |
|      | mefloquine          | 125 | 0.2683 | 9.6   | 4.02 |
|      | mefloquine          | 125 | 0.2060 | 9.59  | 4.2  |
|      | mefloquine          | 125 | 0.2744 | 9.62  | 4.2  |
|      | mefloquine          | 125 | 0.2668 | 9.59  | 4.08 |
|      | mefloquine          | 125 | 0.2661 | 9.57  | 4.17 |
|      | mefloquine          | 250 | 0.5333 | 12.07 | 4.62 |
|      | mefloquine          | 250 | 0.5400 | 12.07 | 4.69 |
|      | mefloquine          | 250 | 0.5318 | 12.07 | 4.62 |
|      | mefloquine          | 250 | 0.5347 | 12.14 | 4.69 |
|      | mefloquine          | 250 | 0.5260 | 12.12 | 4.6  |
|      | mefloquine          | 250 |        |       |      |
|      | mefloquine          | 250 |        |       |      |
|      | mefloquine          | 250 |        |       |      |
|      | mefloquine          | 250 |        |       |      |
|      | mefloquine          | 250 |        |       |      |
|      | mefloquine          | 250 |        |       |      |
|      | mefloquine          | 250 |        |       |      |
|      | mefloquine          | 250 |        |       |      |
|      | mefloquine          | 250 |        |       |      |
|      | mefloquine          | 250 |        |       |      |
|      | mefloquine          | 250 |        |       |      |
|      | mefloquine          | 250 |        |       |      |
|      | mefloquine          | 250 |        |       |      |
|      | mefloquine          | 250 |        |       |      |
|      | mefloquine          | 250 |        |       |      |
|      | mefloquine          | 250 |        |       |      |
|      | mefloquine          | 250 |        |       |      |
|      | mefloquine          | 250 |        |       |      |
|      | mefloquine          | 250 |        |       |      |
|      | mefloquine          | 275 | 0.9594 | 19.14 | 9.09 |
|      | sulfadoxine         | 500 | 0.7044 | 13.08 | 4.31 |
|      | sulfadoxine         | 500 | 0.6587 | 19.11 | 7.05 |
|      | sulfadoxine         | 500 | 0.667  | 12.57 | 4.21 |
|      | sulfadoxine         | 500 | 0.6661 | 12.59 | 4.22 |
|      | sulfamethoxyprazine | 250 |        |       |      |
|      | sulfamethoxyprazine | 250 |        |       |      |
|      | sulfamethoxyprazine | 250 |        |       |      |
|      | sulfamethoxyprazine | 250 |        |       |      |
|      | sulfamethoxyprazine | 250 |        |       |      |
|      | sulfamethoxyprazine | 250 |        |       |      |
|      | sulfamethoxyprazine | 500 |        |       |      |
|      | sulfamethoxyprazine | 500 |        |       |      |
|      | sulfamethoxyprazine | 500 |        |       |      |
|      | sulfamethoxyprazine | 500 |        |       |      |









|     |              |      |      |
|-----|--------------|------|------|
| CDC | lumefantrine | 1080 |      |
|     | lumefantrine | 1080 |      |
| CDC | lumefantrine | 1080 |      |
|     | lumefantrine | 1080 |      |
| CDC | lumefantrine | 1080 |      |
|     | lumefantrine | 1080 |      |
|     | lumefantrine | 1080 |      |
| CDC | lumefantrine | 1080 |      |
|     | lumefantrine |      | 1080 |
|     | lumefantrine |      | 1080 |
| CDC | lumefantrine | 1080 |      |
|     | lumefantrine | 1080 |      |
|     | lumefantrine | 1080 |      |
|     | lumefantrine | 1080 |      |
| CDC | lumefantrine | 1080 |      |
|     | lumefantrine | 1080 |      |
| CDC | lumefantrine |      | 1080 |
|     | lumefantrine |      | 1080 |
| CDC | lumefantrine |      | 1080 |
|     | lumefantrine |      | 1080 |
|     | lumefantrine |      | 1080 |
| CDC | lumefantrine |      | 1080 |
|     | lumefantrine |      | 1080 |
| CDC | lumefantrine |      | 1080 |
|     | lumefantrine |      | 1080 |
|     | lumefantrine | 1080 |      |
|     | lumefantrine | 1080 |      |
| CDC | lumefantrine | 1080 |      |
|     | lumefantrine | 1080 |      |
| CDC | lumefantrine | 1080 |      |
|     | lumefantrine | 1080 |      |
|     | lumefantrine | 1080 |      |
|     | lumefantrine | 1080 |      |
| CDC | lumefantrine | 1080 |      |
|     | lumefantrine | 1080 |      |
| CDC | lumefantrine | 1080 |      |
|     | lumefantrine |      | 1080 |
|     | lumefantrine | 2160 |      |
|     | lumefantrine | 1440 |      |
|     | lumefantrine | 1440 |      |
|     | lumefantrine | 1440 |      |
| CDC | lumefantrine | 1440 |      |
|     | lumefantrine | 1440 |      |
| CDC | lumefantrine | 1440 |      |
|     | lumefantrine | 1440 |      |

|     |              |      |    |        |
|-----|--------------|------|----|--------|
| CDC | lumefantrine | 1440 |    |        |
|     | lumefantrine | 1440 |    |        |
| CDC | lumefantrine | 1440 |    |        |
|     | lumefantrine | 1440 |    |        |
|     | lumefantrine | 1440 |    |        |
| CDC | lumefantrine | 1440 |    |        |
|     | lumefantrine | 1440 |    |        |
|     | lumefantrine | 1440 |    |        |
| CDC | lumefantrine | 1440 |    |        |
|     | lumefantrine | 1440 |    |        |
| CDC | lumefantrine | 1440 |    |        |
|     | lumefantrine | 1440 |    |        |
| CDC | lumefantrine | 1440 |    |        |
|     | lumefantrine | 1440 |    |        |
| CDC | lumefantrine | 1440 |    |        |
|     | lumefantrine | 1440 |    |        |
| CDC | lumefantrine | 1440 |    |        |
|     | lumefantrine | 1440 |    |        |
| CDC | lumefantrine | 1440 |    |        |
|     | lumefantrine | 1440 |    |        |
| CDC | lumefantrine | 1440 |    |        |
|     | lumefantrine | 1440 |    |        |
| CDC | lumefantrine | 1440 |    |        |
|     | lumefantrine | 1440 |    |        |
| CDC | lumefantrine | 1440 |    |        |
|     | lumefantrine | 1440 |    |        |
|     | amodiaquine  |      | 75 | 0.474  |
|     | amodiaquine  | 75   |    | 0.4832 |
|     | amodiaquine  | 75   |    | 0.5265 |
|     | amodiaquine  | 75   |    | 0.516  |
|     | amodiaquine  | 150  |    | 0.9376 |
|     | amodiaquine  | 150  |    | 1.0417 |
|     | amodiaquine  | 150  |    | 0.9444 |
|     | amodiaquine  | 150  |    | 1.0215 |
|     | amodiaquine  | 150  |    | 1.0089 |
|     | amodiaquine  | 150  |    |        |
|     | amodiaquine  | 150  |    |        |
|     | amodiaquine  | 150  |    |        |

CDC

CDC

CDC

CDC

CDC

CDC

CDC

CDC

CDC

piperaquine phosphate 640

piperaquine phosphate 640

piperaquine phosphate 640

piperaquine phosphate 640

CDC piperaquine phosphate 640

piperaquine phosphate 640

piperaquine phosphate 640

CDC piperaquine phosphate 640

piperaquine phosphate 640

CDC piperaquine phosphate 640

piperaquine phosphate 640

CDC piperaquine phosphate 640

piperaquine phosphate 640

piperaquine phosphate 640

CDC piperaquine 720

piperaquine 720

CDC piperaquine 720

piperaquine 720











|     |   |   |       |
|-----|---|---|-------|
| XXX | y | n | XXXXX |
| XXX | y | n | XXXXX |
| XXX | y | n | XXXXX |
| XXX | y | n | XXXXX |
| XXX | y | n | XXXXX |
| XXX | y | n | XXXXX |
| XXX | y | n | XXXXX |

---

| <b>analysis date</b> | <b>mean of two deterri</b> | <b>CDC % API2</b> | <b>gennar strengthg analysis date</b> |
|----------------------|----------------------------|-------------------|---------------------------------------|
| 06/02/2013           | <b>83.6</b>                |                   |                                       |
| 06/02/2013           | <b>83.8</b>                |                   |                                       |
| 06/02/2013           | <b>86.7</b>                |                   |                                       |
| 01/02/2013           | <b>94.4</b>                |                   |                                       |
| 01/02/2013           | <b>92.9</b>                |                   |                                       |
| 01/02/2013           | <b>95.8</b>                |                   |                                       |
| 01/02/2013           | <b>99.8</b>                |                   |                                       |
| 01/02/2013           | <b>88.3</b>                |                   |                                       |
| 01/02/2013           | <b>92.4</b>                |                   |                                       |
| 01/02/2013           | <b>93.3</b>                |                   |                                       |
| 01/02/2013           | <b>93.4</b>                |                   |                                       |
| 01/02/2013           | <b>92.6</b>                |                   |                                       |
| 01/02/2013           | <b>94.8</b>                |                   |                                       |
| 01/02/2013           | <b>96.5</b>                |                   |                                       |
| 01/02/2013           | <b>86.8</b>                |                   |                                       |
| 01/02/2013           | <b>98.3</b>                |                   |                                       |
| 01/02/2013           | <b>91.7</b>                |                   |                                       |
| 01/02/2013           | <b>95.3</b>                |                   |                                       |
| 01/02/2013           | <b>90.6</b>                |                   |                                       |
| 01/02/2013           | <b>92.9</b>                |                   |                                       |
| 01/02/2013           | <b>90.1</b>                |                   |                                       |
| 01/02/2013           | <b>91.9</b>                |                   |                                       |
| 01/02/2013           | <b>92.7</b>                |                   |                                       |
| 01/02/2013           | <b>98.8</b>                |                   |                                       |
| 01/02/2013           | <b>100.4</b>               |                   |                                       |
| 01/02/2013           | <b>92.7</b>                |                   |                                       |
| 01/02/2013           | <b>90.3</b>                |                   |                                       |
| 01/02/2013           | <b>95.3</b>                | 93.0              |                                       |
| 01/02/2013           | <b>94.6</b>                |                   |                                       |
| 01/02/2013           | <b>92.1</b>                |                   |                                       |
| 01/02/2013           | <b>94.9</b>                |                   |                                       |
| 01/02/2013           | <b>96.6</b>                |                   |                                       |
| 01/02/2013           | <b>95.7</b>                |                   |                                       |
| 01/02/2013           | <b>98.3</b>                |                   |                                       |
| 01/02/2013           | <b>96.4</b>                |                   |                                       |
| 01/02/2013           | <b>96.2</b>                |                   |                                       |
| 01/02/2013           | <b>96.7</b>                |                   |                                       |
| 01/02/2013           | <b>93.6</b>                |                   |                                       |
| 01/02/2013           | <b>89.5</b>                |                   |                                       |

|            |              |       |
|------------|--------------|-------|
| 01/02/2013 | <b>97.7</b>  |       |
| 01/02/2013 | <b>95.5</b>  |       |
| 01/02/2013 | <b>96.9</b>  |       |
| 01/02/2013 | <b>93.5</b>  |       |
| 01/02/2013 | <b>95.1</b>  |       |
| 01/02/2013 | <b>91.4</b>  |       |
| 01/02/2013 | <b>87.7</b>  |       |
| 04/02/2013 | <b>94.0</b>  |       |
| 04/02/2013 | <b>100.7</b> | 95.8  |
| 04/02/2013 | <b>96.7</b>  | 102.3 |
| 04/02/2013 | <b>95.8</b>  |       |
| 04/02/2013 | <b>92.4</b>  | 87.4  |
| 04/02/2013 | <b>93.0</b>  |       |
| 04/02/2013 | <b>98.0</b>  |       |
| 04/02/2013 | <b>97.2</b>  |       |
| 04/02/2013 | <b>95.5</b>  | 102.6 |
| 04/02/2013 | <b>94.0</b>  |       |
| 04/02/2013 | <b>106.1</b> | 100.7 |
| 04/02/2013 | <b>98.1</b>  |       |
| 04/02/2013 | <b>95.8</b>  |       |
| 04/02/2013 | <b>94.6</b>  |       |
| 04/02/2013 | <b>93.8</b>  |       |
| 04/02/2013 | <b>94.7</b>  |       |
| 04/02/2013 | <b>98.8</b>  |       |
| 04/02/2013 | <b>98.7</b>  |       |
| 04/02/2013 | <b>96.3</b>  |       |
| 04/02/2013 | <b>97.8</b>  |       |
| 04/02/2013 | <b>100.3</b> |       |
| 04/02/2013 | <b>95.3</b>  |       |
| 04/02/2013 | <b>97.8</b>  |       |
| 04/02/2013 | <b>98.9</b>  |       |
| 04/02/2013 | <b>104.7</b> | 99.4  |
| 04/02/2013 | <b>98.0</b>  |       |
| 04/02/2013 | <b>97.0</b>  |       |
| 04/02/2013 | <b>93.8</b>  |       |
| 04/02/2013 | <b>102.8</b> |       |
| 04/02/2013 | <b>98.3</b>  |       |
| 04/02/2013 | <b>97.7</b>  |       |
| 04/02/2013 | <b>91.0</b>  |       |
| 04/02/2013 | <b>99.2</b>  |       |
| 04/02/2013 | <b>100.8</b> |       |
| 04/02/2013 | <b>93.8</b>  |       |
| 04/02/2013 | <b>98.1</b>  | 98.6  |
| 04/02/2013 | <b>96.3</b>  |       |
| 04/02/2013 | <b>99.8</b>  |       |
| 04/02/2013 | <b>91.4</b>  |       |
| 04/02/2013 | <b>96.8</b>  |       |
| 04/02/2013 | <b>99.2</b>  |       |
| 04/02/2013 | <b>94.9</b>  |       |
| 04/02/2013 | <b>98.3</b>  |       |

|            |              |       |
|------------|--------------|-------|
| 04/02/2013 | <b>97.0</b>  |       |
| 04/02/2013 | <b>94.1</b>  |       |
| 04/02/2013 | <b>96.2</b>  | 100.5 |
| 04/02/2013 | <b>93.1</b>  |       |
| 04/02/2013 | <b>92.9</b>  |       |
| 04/02/2013 | <b>101.9</b> |       |
| 04/02/2013 | <b>100.9</b> |       |
| 04/02/2013 | <b>104.5</b> |       |
| 04/02/2013 | <b>93.1</b>  |       |
| 04/02/2013 | <b>93.0</b>  |       |
| 04/02/2013 | <b>95.4</b>  |       |
| 04/02/2013 | <b>100.0</b> |       |
| 04/02/2013 | <b>94.2</b>  |       |
| 04/02/2013 | <b>98.2</b>  |       |
| 04/02/2013 | <b>98.1</b>  |       |
| 05/02/2013 | <b>92.1</b>  |       |
| 05/02/2013 | <b>95.4</b>  |       |
| 05/02/2013 | <b>93.4</b>  |       |
| 05/02/2013 | <b>89.8</b>  |       |
| 05/02/2013 | <b>97.2</b>  |       |
| 05/02/2013 | <b>95.1</b>  |       |
| 05/02/2013 | <b>93.5</b>  |       |
| 05/02/2013 | <b>91.6</b>  |       |
| 05/02/2013 | <b>96.8</b>  |       |
| 05/02/2013 | <b>96.4</b>  |       |
| 05/02/2013 | <b>95.9</b>  |       |
| 05/02/2013 | <b>97.9</b>  |       |
| 05/02/2013 | <b>97.8</b>  |       |
| 05/02/2013 | <b>95.0</b>  |       |
| 05/02/2013 | <b>98.9</b>  |       |
| 05/02/2013 | <b>96.8</b>  |       |
| 05/02/2013 | <b>96.8</b>  |       |
| 05/02/2013 | <b>95.5</b>  |       |
| 05/02/2013 | <b>100.4</b> |       |
| 05/02/2013 | <b>96.0</b>  |       |
| 05/02/2013 | <b>99.3</b>  |       |
| 05/02/2013 | <b>97.2</b>  |       |
| 05/02/2013 | <b>98.1</b>  | 105.8 |
| 05/02/2013 | <b>94.8</b>  |       |
| 05/02/2013 | <b>99.3</b>  |       |
| 05/02/2013 | <b>94.9</b>  |       |
| 05/02/2013 | <b>90.1</b>  |       |
| 05/02/2013 | <b>93.5</b>  |       |
| 05/02/2013 | <b>92.7</b>  |       |
| 05/02/2013 | <b>95.9</b>  |       |
| 05/02/2013 | <b>96.6</b>  |       |
| 05/02/2013 | <b>96.4</b>  |       |
| 05/02/2013 | <b>96.1</b>  |       |
| 05/02/2013 | <b>100.7</b> |       |
| 05/02/2013 | <b>95.5</b>  |       |

|            |       |       |
|------------|-------|-------|
| 05/02/2013 | 96.6  |       |
| 05/02/2013 | 96.4  |       |
| 05/02/2013 | 94.3  |       |
| 05/02/2013 | 98.0  |       |
| 05/02/2013 | 95.6  |       |
| 05/02/2013 | 96.7  | 100.5 |
| 05/02/2013 | 95.1  |       |
| 05/02/2013 | 90.9  |       |
| 05/02/2013 | 92.3  |       |
| 05/02/2013 | 93.7  |       |
| 05/02/2013 | 97.9  |       |
| 05/02/2013 | 94.6  | 99.2  |
| 05/02/2013 | 97.6  |       |
| 05/02/2013 | 97.1  |       |
| 05/02/2013 | 95.8  | 96.7  |
| 05/02/2013 | 97.6  |       |
| 05/02/2013 | 98.4  | 96.8  |
| 05/02/2013 | 98.3  | 102.3 |
| 06/02/2013 | 82.4  |       |
| 06/02/2013 | 81.0  |       |
| 06/02/2013 | 98.9  |       |
| 06/02/2013 | 71.0  |       |
| 06/02/2013 | 84.4  |       |
| 06/02/2013 | 90.0  |       |
| 06/02/2013 | 90.0  | 100.2 |
| 06/02/2013 | 89.5  |       |
| 06/02/2013 | 88.1  |       |
| 06/02/2013 | 88.7  |       |
| 06/02/2013 | 86.6  |       |
| 06/02/2013 | 91.1  |       |
| 06/02/2013 | 99.3  |       |
| 06/02/2013 | 89.8  |       |
| 06/02/2013 | 91.4  |       |
| 06/02/2013 | 105.6 |       |
| 06/02/2013 | 87.9  |       |
| 06/02/2013 | 86.0  |       |
| 06/02/2013 | 88.4  |       |
| 06/02/2013 | 90.0  |       |
| 06/02/2013 | 93.2  |       |
| 06/02/2013 | 90.1  |       |
| 06/02/2013 | 87.0  |       |
| 06/02/2013 | 92.5  |       |
| 06/02/2013 | 94.2  |       |
| 06/02/2013 | 86.4  |       |
| 06/02/2013 | 95.6  |       |
| 06/02/2013 | 94.4  |       |
| 06/02/2013 | 91.6  |       |
| 06/02/2013 | 97.3  |       |
| 06/02/2013 | 93.9  |       |
| 06/02/2013 | 96.6  | 99.1  |

|            |       |       |
|------------|-------|-------|
| 06/02/2013 | 96.5  |       |
| 06/02/2013 | 93.5  |       |
| 06/02/2013 | 99.1  |       |
| 06/02/2013 | 96.4  |       |
| 06/02/2013 | 90.7  |       |
| 06/02/2013 | 85.7  | 88.4  |
| 06/02/2013 | 86.8  |       |
| 06/02/2013 | 76.6  |       |
| 07/02/2013 | 98.5  |       |
| 07/02/2013 | 92.0  |       |
| 07/02/2013 | 94.3  |       |
| 07/02/2013 | 95.4  |       |
| 07/02/2013 | 94.4  | 112.2 |
| 07/02/2013 | 95.0  |       |
| 07/02/2013 | 101.8 |       |
| 07/02/2013 | 95.0  |       |
| 07/02/2013 | 95.2  |       |
| 07/02/2013 | 97.6  |       |
| 07/02/2013 | 91.1  |       |
| 07/02/2013 | 92.9  |       |
| 07/02/2013 | 100.8 | 91.5  |
| 07/02/2013 | 100.8 |       |
| 07/02/2013 | 92.3  |       |
| 07/02/2013 | 96.9  |       |
| 08/02/2013 | 96.5  |       |
| 08/02/2013 | 95.7  |       |
| 08/02/2013 | 93.1  |       |
| 08/02/2013 | 94.6  |       |
| 08/02/2013 | 94.7  |       |
| 08/02/2013 | 96.0  | 109.2 |
| 08/02/2013 | 96.9  |       |
| 08/02/2013 | 98.0  |       |
| 08/02/2013 | 92.8  |       |
| 08/02/2013 | 95.1  |       |
| 08/02/2013 | 95.2  |       |
| 08/02/2013 | 96.0  |       |
| 08/02/2013 | 93.6  |       |
| 08/02/2013 | 95.8  |       |
| 08/02/2013 | 96.0  |       |
| 08/02/2013 | 88.3  |       |
| 08/02/2013 | 93.0  |       |
| 08/02/2013 | 97.2  |       |
| 08/02/2013 | 97.9  |       |
| 08/02/2013 | 96.8  |       |
| 08/02/2013 | 96.4  |       |
| 08/02/2013 | 93.7  |       |
| 08/02/2013 | 94.3  |       |
| 08/02/2013 | 96.1  |       |
| 08/02/2013 | 92.7  |       |
| 08/02/2013 | 97.9  |       |

|            |                       |       |
|------------|-----------------------|-------|
| 08/02/2013 | <b>99.3</b>           |       |
| 08/02/2013 | <b>98.1</b>           |       |
| 08/02/2013 | <b>95.9</b>           |       |
| 08/02/2013 | <b>94.5</b>           |       |
| 08/02/2013 | <b>98.7</b>           | 96.8  |
| 08/02/2013 | <b>96.3</b>           |       |
| 08/02/2013 | <b>102.2</b>          |       |
| 08/02/2013 | <b>95.2</b>           |       |
| 08/02/2013 | <b>96.0</b>           | 107.8 |
| 08/02/2013 | <b>94.5</b>           |       |
| 08/02/2013 | <b>97.0</b>           | 94.2  |
| 08/02/2013 | <b>105.2</b>          |       |
| 08/02/2013 | <b>103.3</b>          |       |
| 08/02/2013 | <b>103.4</b>          | 111.0 |
| 11/02/2013 | <b>101.2</b>          |       |
| 11/02/2013 | <b>96.7</b>           |       |
| 11/02/2013 | <b>98.2</b>           |       |
| 11/02/2013 | <b>96.0</b>           |       |
| 11/02/2013 | <b>93.3</b>           | 110.2 |
| 11/02/2013 | <b>95.2</b>           |       |
| 11/02/2013 | <b>93.9</b>           |       |
| 11/02/2013 | <b>98.3</b>           |       |
| 11/02/2013 | <b>99.4</b>           |       |
| 11/02/2013 | <b>97.0</b>           | 98.2  |
| 11/02/2013 | <b>96.4</b>           |       |
| 11/02/2013 | <b>96.1</b>           |       |
| 11/02/2013 | <b>102.2</b>          |       |
| 11/02/2013 | <b>88.4</b>           |       |
| 11/02/2013 | <b>99.6</b>           |       |
| 11/02/2013 | <b>100.4</b>          |       |
| 11/02/2013 | <b>94.4</b>           |       |
| 11/02/2013 | <b>98.2</b>           |       |
| 11/02/2013 | <b>99.2</b>           | 103.2 |
| 11/02/2013 | <b>97.9</b>           |       |
| 11/02/2013 | <b>95.4</b>           | 101.2 |
| 11/02/2013 | <b>97.6</b>           |       |
| 11/02/2013 | <b>97.2</b>           |       |
| 11/02/2013 | <b>106.3</b>          |       |
| 11/02/2013 | <b>100.8</b>          |       |
| 11/02/2013 | <b>107.0</b>          |       |
| 11/02/2013 | <b>91.8</b>           |       |
| 11/02/2013 | <b>90.4</b>           |       |
| 11/02/2013 | <b>98.3</b>           |       |
| 11/02/2013 | <b>97.8</b>           |       |
| 11/02/2013 | <b>91.3</b>           |       |
| 11/02/2013 | <b>93.7</b>           |       |
| 11/02/2013 | <b>93.3</b>           |       |
| 11/02/2013 | <b>Not detectable</b> |       |
| 11/02/2013 | <b>92.1</b>           |       |
| 11/02/2013 | <b>95.2</b>           |       |

|            |                |                |
|------------|----------------|----------------|
| 11/02/2013 | 98.7           |                |
| 11/02/2013 | 93.1           |                |
| 11/02/2013 | 99.6           |                |
| 11/02/2013 | 88.5           |                |
| 11/02/2013 | 92.3           | 98.6           |
| 11/02/2013 | 94.7           | 105.5          |
| 11/02/2013 | 90.5           |                |
| 11/02/2013 | 99.9           |                |
| 11/02/2013 | 98.2           |                |
| 11/02/2013 | 90.5           | 88.0           |
| 11/02/2013 | 94.3           |                |
| 11/02/2013 | 92.7           | 100.9          |
| 11/02/2013 | 97.7           |                |
| 11/02/2013 | 95.5           |                |
| 11/02/2013 | 95.4           |                |
| 11/02/2013 | 96.4           |                |
| 11/02/2013 | 94.6           |                |
| 11/02/2013 | 91.8           | 93.0           |
| 11/02/2013 | 88.4           |                |
| 11/02/2013 | 91.1           |                |
| 11/02/2013 | 95.8           |                |
| 11/02/2013 | 93.5           |                |
| 11/02/2013 | 104.2          |                |
| 11/02/2013 | 88.0           |                |
| 11/02/2013 | 99.3           |                |
| 11/02/2013 | 96.0           |                |
| 11/02/2013 | 95.3           |                |
| 11/02/2013 | 85.7           |                |
| 11/02/2013 | 100.2          |                |
| 11/02/2013 | 95.0           |                |
| 11/02/2013 | 100.3          |                |
| 11/02/2013 | Not detectable | Not detectable |
| 11/02/2013 | 86.4           |                |
| 11/02/2013 | 93.7           |                |
| 11/02/2013 | 98.6           |                |
| 11/02/2013 | 91.2           |                |
| 11/02/2013 | 98.5           |                |
| 11/02/2013 | 95.0           |                |
| 11/02/2013 | 84.0           |                |
| 11/02/2013 | 102.5          |                |
| 11/02/2013 | 87.4           |                |
| 12/02/2013 | 96.1           |                |
| 12/02/2013 | 95.6           |                |
| 12/02/2013 | 98.3           |                |
| 12/02/2013 | 89.8           |                |
| 12/02/2013 | 102.1          |                |
| 12/02/2013 | 97.6           |                |
| 12/02/2013 | 106.7          | 103.9          |
| 12/02/2013 | 101.0          | 103.9          |
| 12/02/2013 | 89.6           |                |



|            |              |       |
|------------|--------------|-------|
| 12/02/2013 | <b>86.1</b>  |       |
| 12/02/2013 | <b>91.3</b>  |       |
| 12/02/2013 | <b>98.0</b>  |       |
| 12/02/2013 | <b>100.3</b> |       |
| 12/02/2013 | <b>102.9</b> |       |
| 12/02/2013 | <b>91.0</b>  |       |
| 12/02/2013 | <b>98.3</b>  |       |
| 12/02/2013 | <b>95.6</b>  |       |
| 12/02/2013 | <b>97.0</b>  |       |
| 12/02/2013 | <b>99.0</b>  |       |
| 12/02/2013 | <b>101.6</b> |       |
| 12/02/2013 | <b>102.2</b> |       |
| 12/02/2013 | <b>93.8</b>  |       |
| 12/02/2013 | <b>105.2</b> |       |
| 12/02/2013 | <b>104.4</b> |       |
| 12/02/2013 | <b>92.0</b>  |       |
| 12/02/2013 | <b>100.0</b> |       |
| 12/02/2013 | <b>99.8</b>  |       |
| 12/02/2013 | <b>103.6</b> |       |
| 12/02/2013 | <b>102.2</b> |       |
| 12/02/2013 | <b>103.7</b> |       |
| 12/02/2013 | <b>94.8</b>  |       |
| 12/02/2013 | <b>90.4</b>  |       |
| 12/02/2013 | <b>107.1</b> |       |
| 12/02/2013 | <b>107.3</b> |       |
| 12/02/2013 | <b>101.8</b> |       |
| 12/02/2013 | <b>105.0</b> |       |
| 12/02/2013 | <b>101.7</b> |       |
| 12/02/2013 | <b>101.7</b> |       |
| 12/02/2013 | <b>103.1</b> |       |
| 12/02/2013 | <b>104.4</b> |       |
| 12/02/2013 | <b>97.8</b>  |       |
| 12/02/2013 | <b>101.0</b> |       |
| 12/02/2013 | <b>98.8</b>  |       |
| 12/02/2013 | <b>106.2</b> |       |
| 12/02/2013 | <b>103.3</b> | 103.6 |
| 12/02/2013 | <b>96.2</b>  |       |
| 12/02/2013 | <b>99.5</b>  |       |
| 12/02/2013 | <b>101.4</b> |       |
| 12/02/2013 | <b>101.3</b> |       |
| 12/02/2013 | <b>102.8</b> |       |
| 12/02/2013 | <b>101.3</b> |       |
| 12/02/2013 | <b>101.1</b> | 110.8 |
| 12/02/2013 | <b>101.9</b> |       |
| 12/02/2013 | <b>100.8</b> |       |
| 12/02/2013 | <b>99.2</b>  |       |
| 12/02/2013 | <b>102.0</b> |       |
| 12/02/2013 | <b>104.6</b> |       |
| 12/02/2013 | <b>99.2</b>  | 96.1  |
| 12/02/2013 | <b>101.2</b> |       |

|            |              |       |
|------------|--------------|-------|
| 12/02/2013 | <b>98.8</b>  | 108.0 |
| 12/02/2013 | <b>101.2</b> |       |
| 12/02/2013 | <b>95.0</b>  |       |
| 12/02/2013 | <b>99.4</b>  |       |
| 12/02/2013 | <b>106.9</b> |       |
| 12/02/2013 | <b>102.0</b> |       |
| 12/02/2013 | <b>101.6</b> |       |
| 12/02/2013 | <b>104.1</b> |       |
| 12/02/2013 | <b>99.4</b>  | 107.6 |
| 07/02/2013 | <b>52.1</b>  |       |
| 07/02/2013 | <b>53.1</b>  |       |
| 07/02/2013 | <b>96.7</b>  | 104.0 |
| 07/02/2013 | <b>97.5</b>  |       |
| 07/02/2013 | <b>96.5</b>  |       |
| 07/02/2013 | <b>88.4</b>  |       |
| 07/02/2013 | <b>97.6</b>  |       |
| 07/02/2013 | <b>95.8</b>  |       |
| 07/02/2013 | <b>102.9</b> | 104.3 |
| 07/02/2013 | <b>96.4</b>  |       |
| 07/02/2013 | <b>97.6</b>  |       |
| 07/02/2013 | <b>98.2</b>  |       |
| 07/02/2013 | <b>96.7</b>  |       |
| 07/02/2013 | <b>99.4</b>  |       |
| 07/02/2013 | <b>99.8</b>  | 104.2 |
| 07/02/2013 | <b>99.4</b>  |       |
| 07/02/2013 | <b>96.4</b>  |       |
| 07/02/2013 | <b>99.4</b>  |       |
| 07/02/2013 | <b>94.9</b>  |       |
| 07/02/2013 | <b>94.9</b>  |       |
| 07/02/2013 | <b>99.1</b>  | 103.2 |
| 07/02/2013 | <b>97.4</b>  |       |
| 07/02/2013 | <b>95.1</b>  |       |
| 07/02/2013 | <b>99.7</b>  |       |
| 07/02/2013 | <b>90.4</b>  | 100.9 |
| 07/02/2013 | <b>97.9</b>  |       |
| 07/02/2013 | <b>94.7</b>  | 100.5 |
| 07/02/2013 | <b>92.7</b>  |       |
| 07/02/2013 | <b>93.6</b>  |       |
| 07/02/2013 | <b>97.8</b>  |       |
| 07/02/2013 | <b>98.0</b>  |       |
| 07/02/2013 | <b>100.1</b> |       |
| 07/02/2013 | <b>100.4</b> | 98.6  |
| 07/02/2013 | <b>98.3</b>  |       |
| 07/02/2013 | <b>91.0</b>  | 101.9 |
| 19/02/2013 | <b>95.5</b>  |       |
| 13/02/2013 | <b>99.4</b>  |       |
| 13/02/2013 | <b>96.0</b>  |       |
| 13/02/2013 | <b>99.2</b>  |       |
| 13/02/2013 | <b>104.6</b> |       |
| 13/02/2013 | <b>99.5</b>  |       |

|            |              |       |
|------------|--------------|-------|
| 13/02/2013 | <b>90.5</b>  |       |
| 13/02/2013 | <b>95.8</b>  |       |
| 13/02/2013 | <b>104.9</b> |       |
| 13/02/2013 | <b>97.1</b>  |       |
| 13/02/2013 | <b>103.9</b> |       |
| 13/02/2013 | <b>98.5</b>  |       |
| 13/02/2013 | <b>103.3</b> |       |
| 13/02/2013 | <b>92.9</b>  |       |
| 13/02/2013 | <b>100.9</b> |       |
| 13/02/2013 | <b>99.4</b>  |       |
| 13/02/2013 | <b>103.7</b> |       |
| 13/02/2013 | <b>108.0</b> |       |
| 13/02/2013 | <b>98.9</b>  |       |
| 13/02/2013 | <b>94.3</b>  |       |
| 13/02/2013 | <b>99.0</b>  |       |
| 13/02/2013 | <b>98.7</b>  |       |
| 13/02/2013 | <b>103.8</b> |       |
| 13/02/2013 | <b>94.2</b>  |       |
| 13/02/2013 | <b>99.2</b>  |       |
| 13/02/2013 | <b>101.6</b> |       |
| 13/02/2013 | <b>111.9</b> |       |
| 13/02/2013 | <b>101.9</b> |       |
| 13/02/2013 | <b>100.7</b> |       |
| 13/02/2013 | <b>108.5</b> |       |
| 13/02/2013 | <b>99.5</b>  |       |
| 13/02/2013 | <b>102.6</b> |       |
| 13/02/2013 | <b>89.8</b>  |       |
| -          | -            |       |
| 13/02/2013 | <b>106.1</b> | 96.3  |
| 13/02/2013 | <b>105.4</b> |       |
| 13/02/2013 | <b>95.9</b>  | 99.7  |
| 13/02/2013 | <b>101.9</b> |       |
| 13/02/2013 | <b>92.7</b>  |       |
| 13/02/2013 | <b>105.8</b> |       |
| 13/02/2013 | <b>90.7</b>  |       |
| 13/02/2013 | <b>104.6</b> |       |
| 13/02/2013 | <b>105.2</b> |       |
| 13/02/2013 | <b>97.5</b>  |       |
| 13/02/2013 | <b>94.5</b>  |       |
| 13/02/2013 | <b>100.6</b> |       |
| 14/02/2013 | <b>108.7</b> |       |
| 14/02/2013 | <b>99.6</b>  |       |
| 14/02/2013 | <b>105.8</b> |       |
| 14/02/2013 | <b>95.1</b>  |       |
| 14/02/2013 | <b>104.3</b> |       |
| 14/02/2013 | <b>101.9</b> | 103.1 |
| 14/02/2013 | <b>100.6</b> |       |
| 14/02/2013 | <b>98.6</b>  |       |
| 14/02/2013 | <b>101.8</b> |       |
| 14/02/2013 | <b>106.1</b> |       |

|            |              |       |
|------------|--------------|-------|
| 14/02/2013 | <b>101.7</b> |       |
| 14/02/2013 | <b>97.1</b>  |       |
| 14/02/2013 | <b>107.3</b> |       |
| 14/02/2013 | <b>98.0</b>  |       |
| 14/02/2013 | <b>105.3</b> |       |
| 14/02/2013 | <b>101.3</b> |       |
| 14/02/2013 | <b>105.6</b> |       |
| 14/02/2013 | <b>101.0</b> |       |
| 14/02/2013 | <b>101.8</b> |       |
| 14/02/2013 | <b>98.7</b>  |       |
| 14/02/2013 | <b>110.9</b> |       |
| 14/02/2013 | <b>106.5</b> |       |
| 14/02/2013 | <b>101.5</b> |       |
| 14/02/2013 | <b>95.5</b>  |       |
| 14/02/2013 | <b>102.6</b> |       |
| 14/02/2013 | <b>102.4</b> |       |
| 14/02/2013 | <b>107.6</b> |       |
| 14/02/2013 | <b>91.3</b>  | 104.3 |
| 14/02/2013 | <b>109.1</b> |       |
| 14/02/2013 | <b>100.1</b> |       |
| 14/02/2013 | <b>102.8</b> |       |
| 14/02/2013 | <b>109.9</b> | 102.4 |
| 14/02/2013 | <b>104.8</b> |       |
| 14/02/2013 | <b>106.2</b> |       |
| 14/02/2013 | <b>103.7</b> |       |
| 14/02/2013 | <b>99.0</b>  |       |
| 14/02/2013 | <b>110.0</b> |       |
| 14/02/2013 | <b>114.5</b> | 91.5  |
| 14/02/2013 | <b>97.1</b>  |       |
| 14/02/2013 | <b>95.9</b>  |       |
| 14/02/2013 | <b>96.7</b>  |       |
| 14/02/2013 | <b>97.8</b>  |       |
| 14/02/2013 | <b>99.9</b>  |       |
| 14/02/2013 | <b>96.7</b>  |       |
| 14/02/2013 | <b>103.7</b> |       |
| 14/02/2013 | <b>103.2</b> |       |
| 14/02/2013 | <b>107.5</b> |       |
| 14/02/2013 | <b>91.1</b>  | 98.5  |
| 14/02/2013 | <b>108.5</b> |       |
| 14/02/2013 | <b>105.1</b> |       |
| 14/02/2013 | <b>112.9</b> |       |
| 14/02/2013 | <b>101.1</b> |       |
| 14/02/2013 | <b>105.4</b> |       |
| 14/02/2013 | <b>104.0</b> |       |
| 14/02/2013 | <b>104.7</b> |       |
| 14/02/2013 | <b>103.7</b> |       |
| 14/02/2013 | <b>102.5</b> |       |
| 14/02/2013 | <b>105.6</b> |       |
| 14/02/2013 | <b>110.6</b> |       |
| 14/02/2013 | <b>99.6</b>  |       |

|            |              |       |
|------------|--------------|-------|
| 14/02/2013 | <b>105.3</b> |       |
| 14/02/2013 | <b>105.6</b> |       |
| 14/02/2013 | <b>108.6</b> |       |
| 14/02/2013 | <b>111.9</b> |       |
| 14/02/2013 | <b>105.4</b> |       |
| 14/02/2013 | <b>93.6</b>  |       |
| 14/02/2013 | <b>100.9</b> |       |
| 14/02/2013 | <b>105.1</b> |       |
| 14/02/2013 | <b>111.3</b> | 85.0  |
| 14/02/2013 | <b>102.0</b> |       |
| 14/02/2013 | <b>109.5</b> |       |
| 14/02/2013 | <b>114.1</b> |       |
| 14/02/2013 | <b>111.3</b> |       |
| 14/02/2013 | <b>100.6</b> |       |
| 14/02/2013 | <b>111.0</b> |       |
| 14/02/2013 | <b>98.8</b>  |       |
| 14/02/2013 | <b>106.6</b> |       |
| 14/02/2013 | <b>110.5</b> |       |
| 14/02/2013 | <b>102.2</b> | 104.2 |
| 18/02/2013 | <b>89.6</b>  | 102.4 |
| 18/02/2013 | <b>92.5</b>  |       |
| 18/02/2013 | <b>88.7</b>  |       |
| 18/02/2013 | <b>92.5</b>  |       |
| 18/02/2013 | <b>88.2</b>  | 94.3  |
| 18/02/2013 | <b>97.3</b>  |       |
| 18/02/2013 | <b>94.9</b>  |       |
| 18/02/2013 | <b>91.5</b>  |       |
| 18/02/2013 | <b>95.7</b>  |       |
| 18/02/2013 | <b>94.8</b>  |       |
| 18/02/2013 | <b>86.9</b>  |       |
| 18/02/2013 | <b>93.0</b>  | 98.1  |
| 18/02/2013 | <b>94.1</b>  |       |
| 18/02/2013 | <b>88.5</b>  |       |
| 18/02/2013 | <b>97.0</b>  | 100.8 |
| 18/02/2013 | <b>88.3</b>  |       |
| 18/02/2013 | <b>89.5</b>  |       |
| 18/02/2013 | <b>87.5</b>  |       |
| 18/02/2013 | <b>92.1</b>  |       |
| 18/02/2013 | <b>110.9</b> |       |
| 18/02/2013 | <b>86.7</b>  |       |
| 18/02/2013 | <b>86.1</b>  |       |
| 18/02/2013 | <b>91.8</b>  |       |
| 18/02/2013 | <b>92.9</b>  |       |
| 18/02/2013 | <b>95.1</b>  |       |
| 19/02/2013 | <b>89.7</b>  |       |
| 19/02/2013 | <b>95.1</b>  |       |
| 19/02/2013 | <b>88.8</b>  |       |
| 19/02/2013 | <b>89.4</b>  |       |
| 19/02/2013 | <b>86.5</b>  |       |
| 19/02/2013 | <b>90.8</b>  |       |

|            |              |       |
|------------|--------------|-------|
| 19/02/2013 | <b>92.7</b>  |       |
| 19/02/2013 | <b>89.3</b>  |       |
| 19/02/2013 | <b>95.2</b>  |       |
| 19/02/2013 | <b>90.7</b>  |       |
| 19/02/2013 | <b>94.3</b>  |       |
| 19/02/2013 | <b>93.7</b>  | 98.6  |
| 19/02/2013 | <b>93.3</b>  |       |
| 19/02/2013 | <b>93.5</b>  |       |
| 19/02/2013 | <b>93.5</b>  |       |
| 19/02/2013 | <b>92.5</b>  |       |
| 19/02/2013 | <b>93.7</b>  |       |
| 19/02/2013 | <b>86.8</b>  |       |
| 19/02/2013 | <b>90.9</b>  |       |
| 19/02/2013 | <b>85.8</b>  |       |
| 19/02/2013 | <b>95.5</b>  |       |
| 19/02/2013 | <b>96.5</b>  | 78.6  |
| 19/02/2013 | <b>94.1</b>  |       |
| 19/02/2013 | <b>94.5</b>  |       |
| 19/02/2013 | <b>99.4</b>  |       |
| 19/02/2013 | <b>98.5</b>  |       |
| 19/02/2013 | <b>93.4</b>  |       |
| 19/02/2013 | <b>102.3</b> |       |
| 19/02/2013 | <b>109.7</b> |       |
| 19/02/2013 | <b>94.1</b>  |       |
| 19/02/2013 | <b>89.9</b>  |       |
| 19/02/2013 | <b>104.0</b> |       |
| 19/02/2013 | <b>97.3</b>  |       |
| 20/02/2013 | <b>99.4</b>  |       |
| 20/02/2013 | <b>98.4</b>  |       |
| 20/02/2013 | <b>88.0</b>  |       |
| 20/02/2013 | <b>98.5</b>  | 99.1  |
| 20/02/2013 | <b>96.0</b>  |       |
| 20/02/2013 | <b>89.5</b>  | 108.6 |
| 20/02/2013 | <b>92.4</b>  |       |
| 20/02/2013 | <b>95.3</b>  |       |
| 20/02/2013 | <b>88.9</b>  |       |
| 20/02/2013 | <b>91.8</b>  |       |
| 20/02/2013 | <b>92.4</b>  |       |
| 20/02/2013 | <b>90.4</b>  |       |
| 20/02/2013 | <b>91.2</b>  | 70.9  |
| 20/02/2013 | <b>90.1</b>  | 67.4  |
| 20/02/2013 | <b>96.2</b>  |       |
| 20/02/2013 | <b>90.7</b>  |       |
| 20/02/2013 | <b>91.7</b>  |       |
| 20/02/2013 | <b>94.1</b>  |       |
| 20/02/2013 | <b>86.2</b>  |       |
| 20/02/2013 | <b>95.7</b>  |       |
| 20/02/2013 | <b>97.7</b>  |       |
| 20/02/2013 | <b>99.5</b>  |       |
| 20/02/2013 | <b>86.9</b>  |       |

|            |       |      |
|------------|-------|------|
| 20/02/2013 | 85.2  |      |
| 20/02/2013 | 90.5  |      |
| 20/02/2013 | 98.8  |      |
| 20/02/2013 | 86.6  |      |
| 20/02/2013 | 86.0  |      |
| 20/02/2013 | 92.5  |      |
| 20/02/2013 | 98.4  |      |
| 20/02/2013 | 104.3 |      |
| 20/02/2013 | 95.7  |      |
| 20/02/2013 | 96.8  |      |
| 20/02/2013 | 99.6  |      |
| 20/02/2013 | 88.8  |      |
| 20/02/2013 | 86.1  |      |
| 20/02/2013 | 88.7  |      |
| 20/02/2013 | 87.9  |      |
| 20/02/2013 | 94.9  |      |
| 20/02/2013 | 86.3  |      |
| 20/02/2013 | 103.7 |      |
| 20/02/2013 | 98.6  | 91.7 |
| 20/02/2013 | 103.6 |      |
| 20/02/2013 | 95.6  |      |
| 20/02/2013 | 90.9  |      |
| 20/02/2013 | 104.7 |      |
| 20/02/2013 | 86.5  |      |
| 20/02/2013 | 85.6  |      |
| 20/02/2013 | 92.0  |      |
| 20/02/2013 | 85.7  | 96.8 |
| 20/02/2013 | 92.3  |      |
| 20/02/2013 | 98.9  |      |
| 20/02/2013 | 99.6  |      |
| 20/02/2013 | 98.1  |      |
| 20/02/2013 | 91.5  |      |
| 22/02/2013 | 96.3  |      |
| 22/02/2013 | 88.2  | 98.6 |
| 22/02/2013 | 90.2  |      |
| 22/02/2013 | 95.0  |      |
| 22/02/2013 | 36.3  |      |
| 22/02/2013 | 38.2  |      |
| 22/02/2013 | 51.0  |      |
| 22/02/2013 | 34.0  |      |
| 22/02/2013 | 87.7  |      |
| 22/02/2013 | 90.8  |      |
| 22/02/2013 | 91.9  |      |
| 22/02/2013 | 85.7  |      |
| 22/02/2013 | 92.0  |      |
| 22/02/2013 | 96.5  |      |
| 22/02/2013 | 92.0  |      |
| 22/02/2013 | 90.2  |      |
| 22/02/2013 | 93.5  |      |
| 22/02/2013 | 95.4  |      |

|            |       |       |
|------------|-------|-------|
| 22/02/2013 | 86.7  |       |
| 22/02/2013 | 89.3  |       |
| 22/02/2013 | 86.2  |       |
| 22/02/2013 | 88.5  |       |
| 22/02/2013 | 89.9  |       |
| 22/02/2013 | 99.2  |       |
| 22/02/2013 | 90.0  |       |
| 22/02/2013 | 93.9  |       |
| 22/02/2013 | 90.7  |       |
| 22/02/2013 | 86.7  |       |
| 22/02/2013 | 89.5  |       |
| 22/02/2013 | 88.9  |       |
| 22/02/2013 | 95.5  |       |
| 22/02/2013 | 93.1  |       |
| 22/02/2013 | 99.6  |       |
| 22/02/2013 | 99.3  |       |
| 22/02/2013 | 87.7  |       |
| 22/02/2013 | 86.6  |       |
| 22/02/2013 | 89.7  |       |
| 22/02/2013 | 108.3 | 98.6  |
| 22/02/2013 | 90.9  |       |
| 22/02/2013 | 89.5  |       |
| 22/02/2013 | 90.4  |       |
| 22/02/2013 | 89.5  |       |
| 22/02/2013 | 85.8  |       |
| 22/02/2013 | 89.8  | 112.4 |
| 22/02/2013 | 98.0  |       |
| 22/02/2013 | 92.8  |       |
| 22/02/2013 | 89.6  |       |
| 22/02/2013 | 87.6  |       |
| 22/02/2013 | 91.8  |       |
| 22/02/2013 | 92.1  |       |
| 22/02/2013 | 92.7  |       |
| 22/02/2013 | 99.8  |       |
| 22/02/2013 | 87.1  |       |
| 22/02/2013 | 92.7  |       |
| 22/02/2013 | 92.5  |       |
| 22/02/2013 | 88.3  |       |
| 25/02/2013 | 91.7  |       |
| 25/02/2013 | 88.9  |       |
| 25/02/2013 | 91.2  |       |
| 25/02/2013 | 90.8  |       |
| 25/02/2013 | 93.5  |       |
| 25/02/2013 | 87.6  |       |
| 25/02/2013 | 86.2  |       |
| 25/02/2013 | 96.9  |       |
| 25/02/2013 | 92.6  | 97.6  |
| 25/02/2013 | 90.8  |       |
| 25/02/2013 | 99.4  |       |
| 25/02/2013 | 90.2  |       |



|            |              |       |
|------------|--------------|-------|
| 25/02/2013 | <b>93.8</b>  |       |
| 25/02/2013 | <b>92.7</b>  |       |
| 25/02/2013 | <b>98.5</b>  |       |
| 25/02/2013 | <b>93.2</b>  |       |
| 25/02/2013 | <b>87.0</b>  |       |
| 25/02/2013 | <b>94.9</b>  | 105.5 |
| 25/02/2013 | <b>99.9</b>  |       |
| 25/02/2013 | <b>90.5</b>  |       |
| 25/02/2013 | <b>90.4</b>  |       |
| 25/02/2013 | <b>94.5</b>  |       |
| 25/02/2013 | <b>89.3</b>  |       |
| 25/02/2013 | <b>86.9</b>  |       |
| 25/02/2013 | <b>90.1</b>  |       |
| 25/02/2013 | <b>85.9</b>  |       |
| 25/02/2013 | <b>88.3</b>  | 107.7 |
| 25/02/2013 | <b>90.7</b>  |       |
| 25/02/2013 | <b>93.4</b>  |       |
| 25/02/2013 | <b>93.1</b>  |       |
| 25/02/2013 | <b>90.6</b>  |       |
| 25/02/2013 | <b>92.3</b>  |       |
| 25/02/2013 | <b>93.9</b>  |       |
| 25/02/2013 | <b>95.8</b>  |       |
| 25/02/2013 | <b>86.6</b>  |       |
| 25/02/2013 | <b>91.8</b>  |       |
| 25/02/2013 | <b>91.4</b>  |       |
| 25/02/2013 | <b>92.3</b>  |       |
| 25/02/2013 | <b>90.7</b>  |       |
| 25/02/2013 | <b>89.0</b>  |       |
| 25/02/2013 | <b>101.8</b> | 76.3  |
| 25/02/2013 | <b>90.6</b>  |       |
| 25/02/2013 | <b>86.6</b>  |       |
| 25/02/2013 | <b>95.2</b>  |       |
| 25/02/2013 | <b>97.9</b>  |       |
| 25/02/2013 | <b>94.0</b>  |       |
| 25/02/2013 | <b>87.9</b>  | 98.6  |
| 25/02/2013 | <b>101.5</b> |       |
| 25/02/2013 | <b>90.8</b>  |       |
| 25/02/2013 | <b>108.7</b> | 91.8  |
| 25/02/2013 | <b>105.4</b> |       |
| 25/02/2013 | <b>94.0</b>  |       |
| 25/02/2013 | <b>102.2</b> |       |
| 25/02/2013 | <b>87.7</b>  |       |
| 25/02/2013 | <b>101.5</b> |       |
| 25/02/2013 | <b>86.3</b>  |       |
| 25/02/2013 | <b>92.8</b>  |       |
| 25/02/2013 | <b>109.7</b> |       |
| 25/02/2013 | <b>99.5</b>  |       |
| 25/02/2013 | <b>104.1</b> |       |
| 25/02/2013 | <b>94.1</b>  |       |
| 25/02/2013 | <b>107.0</b> |       |

|            |                |                |
|------------|----------------|----------------|
| 25/02/2013 | 91.8           |                |
| 25/02/2013 | 98.2           |                |
| 27/02/2013 | 87.8           |                |
| 27/02/2013 | 88.6           |                |
| 27/02/2013 | 97.0           |                |
| 27/02/2013 | 92.4           |                |
| 27/02/2013 | 95.7           |                |
| 27/02/2013 | 98.4           |                |
| 27/02/2013 | 89.7           |                |
| 27/02/2013 | 94.9           |                |
| 27/02/2013 | 101.2          |                |
| 27/02/2013 | 91.5           |                |
| 27/02/2013 | Not detectable |                |
| 27/02/2013 | 87.3           | 108.0          |
| 27/02/2013 | 86.8           |                |
| 27/02/2013 | 94.1           |                |
| 27/02/2013 | 94.2           |                |
| 27/02/2013 | 91.2           |                |
| 27/02/2013 | 86.5           |                |
| 27/02/2013 | 99.1           |                |
| 27/02/2013 | 94.8           |                |
| 27/02/2013 | 90.3           |                |
| 27/02/2013 | 92.6           |                |
| 27/02/2013 | 89.6           |                |
| 27/02/2013 | 93.5           |                |
| 27/02/2013 | 92.4           |                |
| 27/02/2013 | 87.9           |                |
| 27/02/2013 | 93.7           |                |
| 27/02/2013 | 91.7           |                |
| 27/02/2013 | 90.3           |                |
| 27/02/2013 | 88.5           |                |
| 27/02/2013 | 91.0           |                |
| 27/02/2013 | 90.2           |                |
| 27/02/2013 | 98.8           |                |
| 27/02/2013 | 91.1           |                |
| 27/02/2013 | 92.1           |                |
| 27/02/2013 | 93.8           |                |
| 27/02/2013 | 93.2           |                |
| 27/02/2013 | 91.5           |                |
| 27/02/2013 | 87.7           |                |
| 27/02/2013 | 94.5           |                |
| 27/02/2013 | 87.7           |                |
| 27/02/2013 | 88.0           |                |
| 27/02/2013 | Not detectable | Not detectable |
| 27/02/2013 | 92.7           |                |
| 27/02/2013 | 95.3           |                |
| 27/02/2013 | 90.4           |                |
| 27/02/2013 | 90.7           |                |
| 27/02/2013 | 94.1           |                |
| 28/02/2013 | 92.9           | 111.7          |

|            |       |       |
|------------|-------|-------|
| 28/02/2013 | 85.7  |       |
| 28/02/2013 | 90.3  |       |
| 28/02/2013 | 88.9  |       |
| 28/02/2013 | 91.5  |       |
| 28/02/2013 | 91.3  |       |
| 28/02/2013 | 86.8  | 104.4 |
| 28/02/2013 | 89.4  |       |
| 28/02/2013 | 87.2  |       |
| 28/02/2013 | 85.2  |       |
| 28/02/2013 | 90.9  |       |
| 28/02/2013 | 89.3  | 96.3  |
| 28/02/2013 | 90.5  |       |
| 28/02/2013 | 91.1  | 99.1  |
| 28/02/2013 | 85.9  |       |
| 28/02/2013 | 94.6  |       |
| 28/02/2013 | 92.1  |       |
| 28/02/2013 | 94.5  |       |
| 28/02/2013 | 85.4  |       |
| 28/02/2013 | 87.0  |       |
| 28/02/2013 | 99.4  |       |
| 28/02/2013 | 90.9  |       |
| 28/02/2013 | 100.8 |       |
| 28/02/2013 | 103.8 |       |
| 28/02/2013 | 88.9  |       |
| 28/02/2013 | 104.3 | 104.9 |
| 28/02/2013 | 103.5 |       |
| 28/02/2013 | 92.8  |       |
| 28/02/2013 | 86.4  |       |
| 28/02/2013 | 93.7  |       |
| 28/02/2013 | 99.6  |       |
| 28/02/2013 | 89.4  |       |
| 28/02/2013 | 104.4 |       |
| 28/02/2013 | 90.7  |       |
| 28/02/2013 | 100.7 |       |
| 28/02/2013 | 87.5  |       |
| 28/02/2013 | 104.8 |       |
| 28/02/2013 | 94.3  |       |
| 28/02/2013 | 103.9 |       |
| 28/02/2013 | 93.2  |       |
| 28/02/2013 | 102.7 |       |
| 28/02/2013 | 92.6  |       |
| 28/02/2013 | 94.4  |       |
| 28/02/2013 | 90.2  |       |
| 28/02/2013 | 92.1  |       |
| 28/02/2013 | 94.7  |       |
| 28/02/2013 | 93.8  |       |
| 28/02/2013 | 94.7  |       |
| 28/02/2013 | 94.9  |       |
| 28/02/2013 | 89.8  |       |
| 28/02/2013 | 96.2  |       |

|            |                       |                       |
|------------|-----------------------|-----------------------|
| 28/02/2013 | <b>102.1</b>          |                       |
| 28/02/2013 | <b>86.1</b>           | 108.3                 |
| 28/02/2013 | <b>104.8</b>          |                       |
| 28/02/2013 | <b>106.4</b>          |                       |
| 28/02/2013 | <b>Not detectable</b> | <b>Not detectable</b> |
| 28/02/2013 | <b>91.5</b>           |                       |
| 28/02/2013 | <b>93.3</b>           |                       |
| 28/02/2013 | <b>90.8</b>           |                       |
| 28/02/2013 | <b>91.0</b>           |                       |
| 28/02/2013 | <b>85.3</b>           |                       |
| 28/02/2013 | <b>95.9</b>           |                       |
| 28/02/2013 | <b>87.8</b>           |                       |
| 28/02/2013 | <b>90.9</b>           |                       |
| 28/02/2013 | <b>85.7</b>           |                       |
| 28/02/2013 | <b>93.2</b>           |                       |
| 28/02/2013 | <b>92.0</b>           | 85.5                  |
| 28/02/2013 | <b>93.1</b>           |                       |
| 28/02/2013 | <b>101.5</b>          |                       |
| 25/02/2013 | <b>102.9</b>          |                       |
| 25/02/2013 | <b>102.4</b>          |                       |
| 25/02/2013 | <b>93.7</b>           |                       |
| 25/02/2013 | <b>109.1</b>          |                       |
| 25/02/2013 | <b>107.7</b>          |                       |
| 25/02/2013 | <b>108.1</b>          |                       |
| 26/02/2013 | <b>95.8</b>           |                       |
| 26/02/2013 | <b>91.9</b>           |                       |
| 26/02/2013 | <b>88.9</b>           |                       |
| 26/02/2013 | <b>88.3</b>           |                       |
| 26/02/2013 | <b>85.1</b>           |                       |
| 26/02/2013 | <b>89.8</b>           | 95.1                  |
| 26/02/2013 | <b>92.4</b>           | 83.9                  |
| 26/02/2013 | <b>99.9</b>           |                       |
| 26/02/2013 | <b>88.4</b>           |                       |
| 26/02/2013 | <b>97.4</b>           |                       |
| 26/02/2013 | <b>88.6</b>           |                       |
| 26/02/2013 | <b>89.6</b>           |                       |
| 26/02/2013 | <b>92.0</b>           |                       |
| 26/02/2013 | <b>89.1</b>           |                       |
| 26/02/2013 | <b>91.3</b>           |                       |
| 26/02/2013 | <b>97.8</b>           |                       |
| 26/02/2013 | <b>100.9</b>          |                       |
| 26/02/2013 | <b>95.9</b>           |                       |
| 26/02/2013 | <b>85.3</b>           |                       |
| 26/02/2013 | <b>94.6</b>           |                       |
| 26/02/2013 | <b>90.4</b>           |                       |
| 26/02/2013 | <b>86.6</b>           |                       |
| 26/02/2013 | <b>97.4</b>           | 66.0                  |
| 26/02/2013 | <b>93.9</b>           |                       |
| 26/02/2013 | <b>94.0</b>           |                       |
| 26/02/2013 | <b>98.2</b>           |                       |

|            |              |      |
|------------|--------------|------|
| 26/02/2013 | <b>90.1</b>  |      |
| 26/02/2013 | <b>111.2</b> |      |
| 26/02/2013 | <b>88.0</b>  |      |
| 26/02/2013 | <b>85.9</b>  |      |
| 26/02/2013 | <b>94.2</b>  |      |
| 26/02/2013 | <b>85.2</b>  |      |
| 26/02/2013 | <b>85.1</b>  |      |
| 26/02/2013 | <b>90.9</b>  |      |
| 26/02/2013 | <b>88.5</b>  |      |
| 26/02/2013 | <b>89.7</b>  |      |
| 26/02/2013 | <b>83.9</b>  | 79.6 |
| 26/02/2013 | <b>91.0</b>  |      |
| 26/02/2013 | <b>86.7</b>  |      |
| 26/02/2013 | <b>86.2</b>  |      |
| 26/02/2013 | <b>87.5</b>  |      |
| 26/02/2013 | <b>87.5</b>  |      |
| 26/02/2013 | <b>86.1</b>  |      |
| 26/02/2013 | <b>85.6</b>  |      |
| 26/02/2013 | <b>90.8</b>  |      |
| 26/02/2013 | <b>88.2</b>  |      |
| 26/02/2013 | <b>91.5</b>  |      |
| 26/02/2013 | <b>86.3</b>  |      |
| 26/02/2013 | <b>88.3</b>  |      |
| 26/02/2013 | <b>89.1</b>  |      |
| 26/02/2013 | <b>92.3</b>  |      |
| 26/02/2013 | <b>87.5</b>  |      |
| 26/02/2013 | <b>86.0</b>  |      |
| 26/02/2013 | <b>94.8</b>  |      |
| 26/02/2013 | <b>100.6</b> |      |
| 26/02/2013 | <b>100.9</b> |      |
| 26/02/2013 | <b>108.2</b> |      |
| 26/02/2013 | <b>91.4</b>  |      |
| 26/02/2013 | <b>91.4</b>  |      |
| 26/02/2013 | <b>94.1</b>  |      |
| 26/02/2013 | <b>98.4</b>  |      |
| 26/02/2013 | <b>90.8</b>  |      |
| 26/02/2013 | <b>88.5</b>  |      |
| 26/02/2013 | <b>98.6</b>  |      |
| 26/02/2013 | <b>88.6</b>  | 99.0 |
| 26/02/2013 | <b>88.8</b>  |      |
| 26/02/2013 | <b>99.7</b>  |      |
| 26/02/2013 | <b>89.7</b>  |      |
| 26/02/2013 | <b>89.6</b>  |      |
| 26/02/2013 | <b>97.8</b>  |      |
| 26/02/2013 | <b>91.2</b>  | 86.3 |
| 26/02/2013 | <b>92.3</b>  |      |
| 26/02/2013 | <b>86.1</b>  |      |
| 26/02/2013 | <b>85.0</b>  |      |
| 26/02/2013 | <b>88.4</b>  |      |
| 26/02/2013 | <b>94.1</b>  |      |





|            |              |       |
|------------|--------------|-------|
|            | -            |       |
|            | -            |       |
|            | -            |       |
|            | -            |       |
|            | -            |       |
| 03/06/2013 | <b>93.8</b>  |       |
| 03/06/2013 | <b>103.8</b> |       |
| 03/06/2013 | <b>101.4</b> |       |
| 03/06/2013 | <b>99.9</b>  |       |
| 03/06/2013 | <b>101.9</b> |       |
| 03/06/2013 | <b>103.8</b> |       |
| 03/06/2013 | <b>100.8</b> |       |
| 03/06/2013 | <b>98.1</b>  |       |
| 03/06/2013 | <b>104.7</b> |       |
| 03/06/2013 | <b>104.1</b> |       |
| 03/06/2013 | <b>106.3</b> |       |
| 03/06/2013 | <b>107.1</b> |       |
| 03/06/2013 | <b>105.0</b> |       |
| 03/06/2013 | <b>102.1</b> | 98.5  |
| 03/06/2013 | <b>102.3</b> |       |
| 03/06/2013 | <b>107.1</b> | 96.6  |
| 03/06/2013 | <b>105.6</b> |       |
| 03/06/2013 | <b>110.1</b> |       |
| 03/06/2013 | <b>104.2</b> |       |
| 03/06/2013 | <b>98.6</b>  |       |
| 03/06/2013 | <b>101.0</b> |       |
| 03/06/2013 | <b>101.9</b> |       |
| 03/06/2013 | <b>105.9</b> |       |
| 03/06/2013 | <b>106.8</b> | 92.1  |
| 03/06/2013 | <b>101.7</b> |       |
| 03/06/2013 | <b>106.5</b> |       |
| 30/05/2013 | <b>102.8</b> |       |
| 30/05/2013 | <b>106.2</b> |       |
| 30/05/2013 | <b>104.1</b> |       |
| 30/05/2013 | <b>107.1</b> |       |
| 30/05/2013 | <b>108.8</b> |       |
| 30/05/2013 | <b>101.7</b> |       |
| 30/05/2013 | <b>103.2</b> |       |
| 30/05/2013 | <b>107.3</b> | 101.5 |
| 30/05/2013 | <b>107.8</b> | 97.4  |
| 30/05/2013 | <b>106.9</b> |       |
| 31/05/2013 | <b>110.8</b> |       |
| 31/05/2013 | <b>103.2</b> |       |
| 31/05/2013 | <b>98.4</b>  |       |
| 31/05/2013 | <b>101.4</b> |       |
| 31/05/2013 | <b>102.5</b> |       |
| 31/05/2013 | <b>107.7</b> |       |
| 31/05/2013 | <b>103.8</b> | 104.8 |
| 31/05/2013 | <b>104.9</b> |       |
| 31/05/2013 | <b>101.7</b> |       |



|            |              |       |
|------------|--------------|-------|
| 31/05/2013 | <b>104.4</b> |       |
| 31/05/2013 | <b>99.9</b>  |       |
| 31/05/2013 | <b>100.2</b> | 103.9 |
| 31/05/2013 | <b>103.1</b> |       |
| 31/05/2013 | <b>102.5</b> |       |
| 31/05/2013 | <b>105.3</b> |       |
| 31/05/2013 | <b>109.4</b> |       |
| 31/05/2013 | <b>105.8</b> |       |
| 31/05/2013 | <b>101.0</b> |       |
| 31/05/2013 | <b>101.8</b> |       |
| 31/05/2013 | <b>104.6</b> |       |
| 04/06/2013 | <b>100.2</b> |       |
| 04/06/2013 | <b>102.1</b> |       |
| 04/06/2013 | <b>100.2</b> |       |
| 31/05/2013 | <b>104.1</b> |       |
| 31/05/2013 | <b>100.4</b> |       |
| 31/05/2013 | <b>103.7</b> |       |
| 31/05/2013 | <b>99.5</b>  |       |
| 31/05/2013 | <b>105.7</b> |       |
| 31/05/2013 | <b>103.4</b> |       |
| 31/05/2013 | <b>101.0</b> | 107.0 |
| 31/05/2013 | <b>99.9</b>  |       |
| 31/05/2013 | <b>103.8</b> |       |
| 03/06/2013 | <b>95.6</b>  |       |
| 03/06/2013 | <b>96.8</b>  |       |
| 03/06/2013 | <b>102.0</b> |       |
| 03/06/2013 | <b>96.7</b>  | 92.1  |
| 03/06/2013 | <b>98.3</b>  |       |
| 03/06/2013 | <b>105.5</b> |       |
| 03/06/2013 | <b>110.3</b> |       |
| 03/06/2013 | <b>108.1</b> |       |
| 03/06/2013 | <b>106.1</b> |       |
| 03/06/2013 | <b>96.2</b>  |       |
| 03/06/2013 | <b>97.0</b>  |       |
| 03/06/2013 | <b>98.3</b>  |       |
| 03/06/2013 | <b>91.6</b>  |       |
| 03/06/2013 | <b>98.8</b>  |       |
| 03/06/2013 | <b>112.9</b> |       |
| 03/06/2013 | <b>105.4</b> |       |
| 03/06/2013 | <b>103.0</b> |       |
| 03/06/2013 | <b>103.1</b> |       |
| 04/06/2013 | <b>107.3</b> |       |
| 04/06/2013 | <b>108.0</b> |       |
| 04/06/2013 | <b>95.6</b>  |       |
| 04/06/2013 | <b>101.6</b> |       |
| 04/06/2013 | <b>99.7</b>  |       |
| 04/06/2013 | <b>102.5</b> |       |
| 04/06/2013 | <b>102.5</b> |       |
| 04/06/2013 | <b>109.5</b> |       |
| 04/06/2013 | <b>103.2</b> |       |

|            |              |       |
|------------|--------------|-------|
| 04/06/2013 | <b>100.3</b> |       |
| 04/06/2013 | <b>100.0</b> |       |
| 04/06/2013 | <b>103.1</b> |       |
| 04/06/2013 | <b>106.5</b> |       |
| 04/06/2013 | <b>112.2</b> |       |
| 04/06/2013 | <b>105.1</b> |       |
| 04/06/2013 | <b>96.7</b>  |       |
| 04/06/2013 | <b>100.6</b> |       |
| 04/06/2013 | <b>104.2</b> |       |
| 04/06/2013 | <b>109.2</b> |       |
| 04/06/2013 | <b>106.6</b> |       |
| 04/06/2013 | <b>106.8</b> |       |
| 04/06/2013 | <b>105.7</b> |       |
| 04/06/2013 | <b>96.9</b>  |       |
| 04/06/2013 | <b>98.5</b>  |       |
| 04/06/2013 | <b>97.3</b>  |       |
| 04/06/2013 | <b>104.8</b> |       |
| 04/06/2013 | <b>107.7</b> |       |
| 04/06/2013 | <b>106.3</b> |       |
| 04/06/2013 | <b>103.9</b> |       |
| 04/06/2013 | <b>106.0</b> |       |
| 04/06/2013 | <b>96.0</b>  |       |
| 04/06/2013 | <b>102.6</b> |       |
| 04/06/2013 | <b>112.6</b> |       |
| 04/06/2013 | <b>114.0</b> |       |
| 04/06/2013 | <b>102.1</b> |       |
| 04/06/2013 | <b>109.8</b> |       |
| 04/06/2013 | <b>100.2</b> |       |
| 04/06/2013 | <b>106.9</b> |       |
| 04/06/2013 | <b>104.3</b> |       |
| 04/06/2013 | <b>103.7</b> |       |
| 04/06/2013 | <b>113.9</b> |       |
| 04/06/2013 | <b>114.1</b> | 93.7  |
| 04/06/2013 | <b>111.4</b> |       |
| 04/06/2013 | <b>109.9</b> | 96.6  |
| 04/06/2013 | <b>110.4</b> | 98.5  |
| 04/06/2013 | <b>101.4</b> | 99.4  |
| 04/06/2013 | <b>106.2</b> |       |
| 04/06/2013 | <b>106.8</b> |       |
| 31/05/2013 | <b>105.1</b> |       |
| 31/05/2013 | <b>104.4</b> | 116.0 |
| 31/05/2013 | <b>108.6</b> | 101.6 |
| 31/05/2013 | <b>104.7</b> |       |
| 31/05/2013 | <b>107.6</b> |       |
| 31/05/2013 | <b>100.5</b> |       |
| 31/05/2013 | <b>104.4</b> |       |
| 31/05/2013 | <b>103.5</b> |       |
| 31/05/2013 | <b>107.7</b> |       |
| 31/05/2013 | <b>106.3</b> |       |
| 31/05/2013 | <b>108.9</b> |       |

|            |              |       |
|------------|--------------|-------|
| 31/05/2013 | <b>108.5</b> | 96.0  |
| 31/05/2013 | <b>109.6</b> |       |
| 31/05/2013 | <b>107.4</b> |       |
| 31/05/2013 | <b>101.4</b> |       |
| 31/05/2013 | <b>103.9</b> |       |
| 31/05/2013 | <b>104.0</b> |       |
| 31/05/2013 | <b>109.4</b> | 99.7  |
| 31/05/2013 | <b>108.0</b> | 96.8  |
| 31/05/2013 | <b>108.5</b> |       |
| 31/05/2013 | <b>104.2</b> |       |
| 31/05/2013 | <b>103.4</b> |       |
| 31/05/2013 | <b>93.6</b>  |       |
| 31/05/2013 | <b>103.3</b> |       |
| 31/05/2013 | <b>106.8</b> |       |
| 31/05/2013 | <b>108.7</b> |       |
| 31/05/2013 | <b>110.4</b> |       |
| 31/05/2013 | <b>108.5</b> |       |
| 31/05/2013 | <b>103.9</b> |       |
| 31/05/2013 | <b>102.3</b> |       |
| 31/05/2013 | <b>100.6</b> |       |
| 31/05/2013 | <b>109.1</b> |       |
| 31/05/2013 | <b>110.9</b> |       |
| 31/05/2013 | <b>108.0</b> |       |
| 31/05/2013 | <b>110.8</b> |       |
| 31/05/2013 | <b>109.3</b> |       |
| 31/05/2013 | <b>102.5</b> |       |
| 31/05/2013 | <b>103.7</b> |       |
| 31/05/2013 | <b>99.3</b>  |       |
| 31/05/2013 | <b>108.0</b> |       |
| 31/05/2013 | <b>108.9</b> |       |
| 31/05/2013 | <b>110.7</b> |       |
| 31/05/2013 | <b>110.3</b> |       |
| 31/05/2013 | <b>108.9</b> |       |
| 31/05/2013 | <b>105.7</b> |       |
| 31/05/2013 | <b>98.8</b>  |       |
| 31/05/2013 | <b>101.7</b> |       |
| 31/05/2013 | <b>101.3</b> |       |
| 31/05/2013 | <b>109.7</b> |       |
| 31/05/2013 | <b>106.1</b> | 96.0  |
| 31/05/2013 | <b>107.8</b> | 99.8  |
| 31/05/2013 | <b>100.0</b> | 102.1 |
| 15/10/2013 | <b>98.5</b>  |       |
| 15/10/2013 | <b>97.6</b>  | 100.7 |
| 05/06/2013 | <b>106.2</b> |       |
| 05/06/2013 | <b>90.8</b>  | 91.0  |
| 05/06/2013 | <b>103.5</b> |       |
| 05/06/2013 | <b>105.7</b> |       |
| 05/06/2013 | <b>102.5</b> |       |
| 05/06/2013 | <b>102.2</b> |       |
| 05/06/2013 | <b>106.4</b> |       |

|            |              |       |
|------------|--------------|-------|
| 05/06/2013 | <b>94.1</b>  |       |
| 05/06/2013 | <b>23.9</b>  |       |
| 05/06/2013 | <b>24.7</b>  |       |
| 05/06/2013 | <b>21.3</b>  |       |
| 05/06/2013 | <b>21.8</b>  |       |
| 05/06/2013 | <b>21.6</b>  |       |
| 05/06/2013 | <b>14.0</b>  |       |
| 05/06/2013 | <b>17.3</b>  |       |
| 05/06/2013 | <b>19.2</b>  |       |
| 05/06/2013 | <b>20.9</b>  |       |
| 05/06/2013 | <b>17.5</b>  |       |
| 05/06/2013 | <b>19.3</b>  |       |
| 05/06/2013 | <b>18.9</b>  |       |
| 05/06/2013 | <b>18.6</b>  |       |
| 05/06/2013 | <b>18.3</b>  |       |
| 05/06/2013 | <b>20.1</b>  |       |
| 05/06/2013 | <b>19.4</b>  |       |
| 05/06/2013 | <b>18.6</b>  |       |
| 05/06/2013 | <b>20.4</b>  |       |
| 05/06/2013 | <b>22.5</b>  |       |
| 05/06/2013 | <b>24.1</b>  |       |
| 05/06/2013 | <b>21.8</b>  |       |
| 05/06/2013 | <b>16.8</b>  |       |
| 05/06/2013 | <b>20.6</b>  |       |
| 05/06/2013 | <b>22.8</b>  |       |
| 05/06/2013 | <b>20.9</b>  |       |
| 05/06/2013 | <b>25.0</b>  |       |
| 05/06/2013 | <b>20.7</b>  |       |
| 05/06/2013 | <b>26.8</b>  |       |
| 05/06/2013 | <b>22.1</b>  |       |
| 05/06/2013 | <b>23.0</b>  |       |
| 05/06/2013 | <b>23.8</b>  |       |
| 05/06/2013 | <b>18.3</b>  |       |
| 05/06/2013 | <b>21.9</b>  |       |
| 05/06/2013 | <b>23.6</b>  |       |
| 05/06/2013 | <b>22.2</b>  |       |
| 24/06/2013 | <b>98.9</b>  | 114.0 |
| 24/06/2013 | <b>96.6</b>  |       |
| 24/06/2013 | <b>113.1</b> | 105.0 |
| 24/06/2013 | <b>95.3</b>  | 107.0 |
| 24/06/2013 | <b>90.5</b>  |       |
| 24/06/2013 | <b>92.2</b>  |       |
| 24/06/2013 | <b>98.3</b>  |       |
| 24/06/2013 | <b>92.7</b>  |       |
| 24/06/2013 | <b>91.1</b>  |       |
| 24/06/2013 | <b>98.7</b>  | 97.0  |
| 24/06/2013 | <b>105.1</b> |       |
| 24/06/2013 | <b>97.2</b>  |       |
| 24/06/2013 | <b>96.4</b>  |       |
| 24/06/2013 | <b>104.1</b> |       |

|            |       |       |             |            |
|------------|-------|-------|-------------|------------|
| 24/06/2013 | 95.4  | 104.0 |             |            |
| 24/06/2013 | 100.9 |       |             |            |
| 24/06/2013 | 98.0  |       |             |            |
| 24/06/2013 | 89.9  |       |             |            |
| 24/06/2013 | 100.3 | 106.0 |             |            |
| 24/06/2013 | 93.7  |       |             |            |
| 24/06/2013 | 98.8  |       |             |            |
| 24/06/2013 | 90.6  |       |             |            |
| 24/06/2013 | 95.0  |       |             |            |
| 24/06/2013 | 102.2 |       |             |            |
| 24/06/2013 | 90.9  |       |             |            |
| 24/06/2013 | 97.6  |       |             |            |
| 24/06/2013 | 95.1  |       |             |            |
| 24/06/2013 | 103.5 |       |             |            |
| 24/06/2013 | 92.5  |       |             |            |
| 24/06/2013 | 99.4  |       |             |            |
| 24/06/2013 | 93.5  |       |             |            |
| 24/06/2013 | 95.0  | 101.0 |             |            |
| 24/06/2013 | 92.5  |       |             |            |
| 24/06/2013 | 90.7  |       |             |            |
| 24/06/2013 | 93.1  |       |             |            |
| 24/06/2013 | 92.2  |       |             |            |
| 24/06/2013 | 90.1  |       |             |            |
| 24/06/2013 | 93.3  |       |             |            |
| 24/06/2013 | 93.9  |       |             |            |
| 24/06/2013 | 99.0  | 113.0 |             |            |
| 24/06/2013 | 94.8  |       |             |            |
| 24/06/2013 | 94.4  |       |             |            |
| 24/06/2013 | 95.8  |       |             |            |
| 24/06/2013 | 91.6  |       |             |            |
| 24/06/2013 | 96.8  |       |             |            |
| 24/06/2013 | 93.6  |       |             |            |
| 24/06/2013 | 90.8  |       |             |            |
| 25/06/2013 | 96.1  |       | pyrime 25   | 25/06/2013 |
| 25/06/2013 | 102.3 |       | pyrime 25   | 25/06/2013 |
| 25/06/2013 | 99.1  |       | pyrime 25   | 25/06/2013 |
| 25/06/2013 | 91.6  |       | pyrime 25   | 25/06/2013 |
| 25/06/2013 | 108.0 |       | pyrime 25   | 25/06/2013 |
| 25/06/2013 | 111.2 |       | pyrime 25   | 25/06/2013 |
| 25/06/2013 | 103.8 |       | pyrime 25   | 25/06/2013 |
| 25/06/2013 | 81.1  |       | pyrime 25   | 25/06/2013 |
| 25/06/2013 | 92.7  |       | pyrime 20   | 25/06/2013 |
| 25/06/2013 | 74.7  |       | pyrime 25   | 25/06/2013 |
| 25/06/2013 | 72.1  |       | pyrime 25   | 25/06/2013 |
| 25/06/2013 | 95.0  |       | pyrime 12.5 | 25/06/2013 |
| 25/06/2013 | 104.4 |       | pyrime 12.5 | 25/06/2013 |
| 25/06/2013 | 104.1 |       | pyrime 12.5 | 25/06/2013 |
| 25/06/2013 | 98.2  |       | pyrime 12.5 | 25/06/2013 |
| 25/06/2013 | 96.4  |       | pyrime 12.5 | 25/06/2013 |
| 25/06/2013 | 98.2  |       | pyrime 12.5 | 25/06/2013 |



|            |                |                |
|------------|----------------|----------------|
| 26/03/2013 | 95.6           | 86.0           |
| 26/03/2013 | 110.3          | 80.0           |
| 26/03/2013 | 111.8          |                |
| 26/03/2013 | 102.4          |                |
| 26/03/2013 | 102.8          |                |
| 26/03/2013 | 103.7          |                |
| 26/03/2013 | 103.7          |                |
| 26/03/2013 | 108.2          |                |
| 26/03/2013 | 108.0          |                |
| 26/03/2013 | 99.2           |                |
| 26/03/2013 | 96.8           | 83.5           |
| 26/03/2013 | 105.1          |                |
| 26/03/2013 | 103.3          | 111.4          |
| 26/03/2013 | 102.3          |                |
| 26/03/2013 | 107.3          |                |
| 26/03/2013 | 101.6          |                |
| 26/03/2013 | 88.5           |                |
| 26/03/2013 | 98.5           |                |
| 26/03/2013 | 104.6          |                |
| 26/03/2013 | 99.6           |                |
| 26/03/2013 | 97.6           |                |
| 26/03/2013 | 101.7          |                |
| 26/03/2013 | 106.7          |                |
| 26/03/2013 | 102.5          |                |
| 26/03/2013 | 98.0           |                |
| 26/03/2013 | 100.5          |                |
| 26/03/2013 | 103.2          |                |
| 26/03/2013 | 104.5          |                |
| 26/03/2013 | 86.3           |                |
| 26/03/2013 | 104.1          |                |
| 26/03/2013 | 102.1          |                |
| 26/03/2013 | Not detectable | Not detectable |
| 26/03/2013 | 99.0           |                |
| 26/03/2013 | 102.4          |                |
| 26/03/2013 | 101.9          |                |
| 26/03/2013 | 108.0          |                |
| 26/03/2013 | 91.4           |                |
| 26/03/2013 | Not detectable | Not detectable |
| 26/03/2013 | 112.7          |                |
| 26/03/2013 | 111.4          |                |
| 26/03/2013 | 93.4           |                |
| 26/03/2013 | 106.9          |                |
| 26/03/2013 | 102.4          |                |
| 26/03/2013 | 111.1          |                |
| 26/03/2013 | 111.8          |                |
| 26/03/2013 | 108.3          |                |
| 26/03/2013 | Not detectable |                |
| 26/03/2013 | 107.5          |                |
| 26/03/2013 | 107.9          |                |
| 26/03/2013 | 105.1          | 92.0           |

|            |                |                |
|------------|----------------|----------------|
| 26/03/2013 | 99.2           | 80.0           |
| 26/03/2013 | 110.4          |                |
| 26/03/2013 | 93.3           |                |
| 26/03/2013 | 112.4          |                |
| 26/03/2013 | 109.4          |                |
| 26/03/2013 | Not detectable | Not detectable |
| 26/03/2013 | 105.9          | 91.3           |
| 26/03/2013 | 112.8          |                |
| 26/03/2013 | 106.4          |                |
| 26/03/2013 | 110.5          |                |
| 26/03/2013 | 111.8          | 84.3           |
| 27/03/2013 | Not detectable | Not detectable |
| 27/03/2013 | 105.0          |                |
| 27/03/2013 | 108.6          |                |
| 27/03/2013 | 95.4           |                |
| 27/03/2013 | 110.0          |                |
| 27/03/2013 | 112.0          | 87.4           |
| 27/03/2013 | 106.5          |                |
| 27/03/2013 | 107.6          |                |
| 27/03/2013 | 105.3          |                |
| 27/03/2013 | 106.0          |                |
| 27/03/2013 | 104.0          |                |
| 27/03/2013 | 106.7          |                |
| 27/03/2013 | 112.1          |                |
| 27/03/2013 | 98.7           |                |
| 27/03/2013 | 93.1           |                |
| 27/03/2013 | Not detectable | Not detectable |
| 27/03/2013 | 108.4          |                |
| 27/03/2013 | 110.0          |                |
| 27/03/2013 | 90.3           |                |
| 27/03/2013 | 95.7           |                |
| 27/03/2013 | 111.3          |                |
| 27/03/2013 | 108.0          |                |
| 27/03/2013 | 100.3          |                |
| 27/03/2013 | 102.8          | 84.1           |
| 27/03/2013 | 105.8          |                |
| 27/03/2013 | 107.8          |                |
| 27/03/2013 | 108.4          |                |
| 03/04/2013 | Not detectable |                |
| 03/04/2013 | 98.8           |                |
| 03/04/2013 | 91.4           |                |
| 03/04/2013 | 109.2          |                |
| 03/04/2013 | 98.4           | 100.2          |
| 03/04/2013 | 107.6          |                |
| 03/04/2013 | 100.2          |                |
| 03/04/2013 | 106.9          |                |
| 03/04/2013 | 104.0          | 83.0           |
| 03/04/2013 | 102.9          |                |
| 03/04/2013 | 105.8          |                |
| 03/04/2013 | 104.6          |                |



|            |                       |                       |            |
|------------|-----------------------|-----------------------|------------|
| 03/04/2013 | <b>106.8</b>          |                       |            |
| 03/04/2013 | <b>106.2</b>          |                       |            |
| 03/04/2013 | <b>97.9</b>           |                       |            |
| 03/04/2013 | <b>104.9</b>          |                       |            |
| 03/04/2013 | <b>Not detectable</b> |                       |            |
| 03/04/2013 | <b>Not detectable</b> | <b>Not detectable</b> |            |
| 03/04/2013 | <b>Not detectable</b> | <b>Not detectable</b> |            |
| 03/04/2013 | <b>100.4</b>          |                       |            |
| 03/04/2013 | <b>100.6</b>          |                       |            |
| 03/04/2013 | <b>Not detectable</b> | <b>Not detectable</b> |            |
| 03/04/2013 | <b>101.6</b>          |                       |            |
| 03/04/2013 | <b>Not detectable</b> | <b>Not detectable</b> |            |
| 03/04/2013 | <b>104.2</b>          |                       |            |
| 03/04/2013 | <b>106.0</b>          |                       |            |
| 03/04/2013 | <b>97.1</b>           |                       |            |
| 03/04/2013 | <b>93.3</b>           | 88.6                  |            |
| 03/04/2013 | <b>102.3</b>          |                       |            |
| 03/04/2013 | <b>99.7</b>           |                       |            |
| 03/04/2013 | <b>105.8</b>          |                       |            |
| 03/04/2013 | <b>98.7</b>           |                       |            |
| 03/04/2013 | <b>104.8</b>          |                       |            |
| 03/04/2013 | <b>100.7</b>          |                       |            |
| 03/04/2013 | <b>100.3</b>          |                       |            |
| 03/04/2013 | <b>102.2</b>          |                       |            |
| 03/04/2013 | <b>99.9</b>           |                       |            |
| 03/04/2013 | <b>105.4</b>          |                       |            |
| 03/04/2013 | <b>104.7</b>          |                       |            |
| 03/04/2013 | <b>100.8</b>          |                       |            |
| 03/04/2013 | <b>105.5</b>          |                       |            |
| 03/04/2013 | <b>99.5</b>           |                       |            |
| 03/04/2013 | <b>99.5</b>           |                       |            |
| 03/04/2013 | <b>101.9</b>          |                       |            |
| 03/04/2013 | <b>107.7</b>          |                       |            |
| 03/04/2013 | <b>107.9</b>          | 81.9                  |            |
| 03/04/2013 | <b>109.5</b>          |                       |            |
| 03/04/2013 | <b>100.9</b>          |                       |            |
| 03/04/2013 | <b>101.6</b>          | 82.9                  |            |
| 03/04/2013 | <b>95.6</b>           |                       |            |
| 09/04/2013 | <b>109.0</b>          |                       | trimetf 90 |
| 09/04/2013 | <b>105.1</b>          |                       | trimetf 90 |
| 09/04/2013 | <b>101.1</b>          |                       | trimetf 90 |
| 09/04/2013 | <b>91.1</b>           |                       | trimetf 90 |
| 09/04/2013 | <b>90.2</b>           |                       | trimetf 90 |
| 09/04/2013 | <b>86.2</b>           |                       | trimetf 90 |
| 09/04/2013 | <b>91.0</b>           | 108.2                 | trimetf 90 |
| 09/04/2013 | <b>94.6</b>           |                       | trimetf 90 |
| 09/04/2013 | <b>95.5</b>           | 79.9                  | trimetf 90 |
| 09/04/2013 | <b>96.4</b>           | 114.0                 | trimetf 90 |
| 09/04/2013 | <b>94.7</b>           |                       | trimetf 90 |
| 09/04/2013 | <b>95.4</b>           |                       | trimetf 90 |

|            |                       |       |
|------------|-----------------------|-------|
| 09/04/2013 | <b>95.9</b>           |       |
| 09/04/2013 | <b>92.8</b>           | 109.9 |
| 09/04/2013 | <b>91.6</b>           |       |
| 09/04/2013 | <b>82.2</b>           |       |
| 09/04/2013 | <b>89.7</b>           |       |
| 09/04/2013 | <b>92.5</b>           |       |
| 09/04/2013 | <b>95.4</b>           |       |
| 09/04/2013 | <b>88.3</b>           |       |
| 09/04/2013 | <b>92.8</b>           |       |
| 09/04/2013 | <b>91.6</b>           |       |
| 09/04/2013 | <b>53.4</b>           |       |
| 09/04/2013 | <b>Not detectable</b> |       |
| 09/04/2013 | <b>89.5</b>           |       |
| 09/04/2013 | <b>88.0</b>           |       |
| 09/04/2013 | <b>90.9</b>           |       |
| 09/04/2013 | <b>90.3</b>           |       |
| 09/04/2013 | <b>96.6</b>           | 93.7  |
| 09/04/2013 | <b>92.2</b>           |       |
| 09/04/2013 | <b>94.2</b>           |       |
| 09/04/2013 | <b>91.9</b>           |       |
| 05/04/2013 | <b>113.6</b>          |       |
| 05/04/2013 | <b>110.8</b>          |       |
| 05/04/2013 | <b>104.8</b>          |       |
| 05/04/2013 | <b>94.3</b>           |       |
| 05/04/2013 | <b>113.5</b>          |       |
| 05/04/2013 | <b>104.2</b>          |       |
| 05/04/2013 | <b>110.8</b>          |       |
| 05/04/2013 | <b>94.8</b>           |       |
| 05/04/2013 | <b>95.3</b>           |       |
| 05/04/2013 | <b>108.8</b>          |       |
| 05/04/2013 | <b>111.7</b>          |       |
| 05/04/2013 | <b>95.7</b>           |       |
| 05/04/2013 | <b>101.7</b>          |       |
| 05/04/2013 | <b>107.2</b>          |       |
| 05/04/2013 | <b>109.2</b>          |       |
| 05/04/2013 | <b>91.7</b>           | 104.1 |
| 05/04/2013 | <b>110.7</b>          |       |
| 05/04/2013 | <b>110.6</b>          |       |
| 05/04/2013 | <b>115.0</b>          |       |
| 05/04/2013 | <b>105.3</b>          |       |
| 05/04/2013 | <b>102.9</b>          |       |
| 05/04/2013 | <b>110.2</b>          |       |
| 05/04/2013 | <b>105.7</b>          |       |
| 05/04/2013 | <b>110.9</b>          | 96.5  |
| 05/04/2013 | <b>102.5</b>          | 97.4  |
| 05/04/2013 | <b>109.4</b>          |       |
| 05/04/2013 | <b>103.8</b>          |       |
| 05/04/2013 | <b>97.8</b>           |       |
| 05/04/2013 | <b>109.4</b>          |       |
| 05/04/2013 | <b>110.0</b>          | 85.4  |

|            |              |       |
|------------|--------------|-------|
| 05/04/2013 | <b>101.8</b> |       |
| 05/04/2013 | <b>90.4</b>  |       |
| 05/04/2013 | <b>109.7</b> |       |
| 05/04/2013 | <b>111.3</b> | 101.8 |
| 05/04/2013 | <b>105.7</b> |       |
| 05/04/2013 | <b>96.3</b>  | 95.2  |
| 05/04/2013 | <b>96.5</b>  | 84.5  |
| 05/04/2013 | <b>105.5</b> |       |
| 05/04/2013 | <b>113.8</b> |       |
| 05/04/2013 | <b>86.6</b>  |       |
| 05/04/2013 | <b>101.5</b> |       |
| 05/04/2013 | <b>110.4</b> |       |
| 05/04/2013 | <b>107.1</b> |       |
| 05/04/2013 | <b>91.8</b>  |       |
| 05/04/2013 | <b>100.0</b> |       |
| 05/04/2013 | <b>109.9</b> |       |
| 05/04/2013 | <b>105.2</b> | 89.6  |
| 05/04/2013 | <b>90.8</b>  |       |
| 05/04/2013 | <b>88.7</b>  |       |
| 05/04/2013 | <b>103.7</b> |       |
| 05/04/2013 | <b>104.2</b> |       |
| 05/04/2013 | <b>91.6</b>  |       |
| 05/04/2013 | <b>112.0</b> |       |
| 05/04/2013 | <b>101.2</b> |       |
| 05/04/2013 | <b>106.5</b> |       |
| 05/04/2013 | <b>98.8</b>  |       |
| 05/04/2013 | <b>103.0</b> |       |
| 05/04/2013 | <b>98.4</b>  |       |
| 05/04/2013 | <b>93.5</b>  |       |
| 05/04/2013 | <b>93.7</b>  |       |
| 05/04/2013 | <b>90.6</b>  |       |
| 05/04/2013 | <b>93.2</b>  |       |
| 05/04/2013 | <b>96.9</b>  |       |
| 05/04/2013 | <b>91.8</b>  |       |
| 05/04/2013 | <b>101.5</b> |       |
| 05/04/2013 | <b>109.5</b> |       |
| 05/04/2013 | <b>105.4</b> |       |
| 05/04/2013 | <b>99.5</b>  |       |
| 05/04/2013 | <b>97.4</b>  |       |
| 05/04/2013 | <b>108.9</b> |       |
| 05/04/2013 | <b>100.9</b> |       |
| 05/04/2013 | <b>91.2</b>  |       |
| 05/04/2013 | <b>114.8</b> |       |
| 05/04/2013 | <b>111.9</b> |       |
| 05/04/2013 | <b>114.1</b> |       |
| 05/04/2013 | <b>97.5</b>  |       |
| 05/04/2013 | <b>109.7</b> |       |
| 05/04/2013 | <b>109.2</b> |       |
| 05/04/2013 | <b>105.2</b> |       |
| 05/04/2013 | <b>91.4</b>  |       |

|            |              |       |
|------------|--------------|-------|
| 09/04/2013 | <b>100.6</b> | 89.1  |
| 09/04/2013 | <b>97.7</b>  |       |
| 09/04/2013 | <b>92.1</b>  |       |
| 09/04/2013 | <b>82.2</b>  |       |
| 09/04/2013 | <b>86.7</b>  |       |
| 09/04/2013 | <b>86.2</b>  |       |
| 09/04/2013 | <b>92.5</b>  |       |
| 09/04/2013 | <b>88.5</b>  |       |
| 09/04/2013 | <b>94.9</b>  |       |
| 09/04/2013 | <b>94.9</b>  |       |
| 09/04/2013 | <b>88.7</b>  | 102.7 |
| 09/04/2013 | <b>85.2</b>  |       |
| 09/04/2013 | <b>92.9</b>  |       |
| 09/04/2013 | <b>92.4</b>  |       |
| 09/04/2013 | <b>91.0</b>  |       |
| 09/04/2013 | <b>88.8</b>  |       |
| 09/04/2013 | <b>89.4</b>  |       |
| 09/04/2013 | <b>92.5</b>  |       |
| 09/04/2013 | <b>85.0</b>  |       |
| 09/04/2013 | <b>88.2</b>  |       |
| 09/04/2013 | <b>84.8</b>  |       |
| 01/07/2013 | <b>102.8</b> |       |
| CDC        | <b>109.5</b> | CDC   |
| 01/07/2013 | <b>107.9</b> |       |
| 01/07/2013 | <b>105.1</b> |       |
| 01/07/2013 | <b>100.3</b> |       |
| 01/07/2013 | <b>104.3</b> |       |
| 01/07/2013 | <b>107.7</b> |       |
| 01/07/2013 | <b>105.1</b> |       |
| CDC        | <b>101.7</b> | CDC   |
| 01/07/2013 | <b>113.5</b> |       |
| 01/07/2013 | <b>107.0</b> |       |
| 01/07/2013 | <b>112.1</b> |       |
| CDC        | <b>98.7</b>  | CDC   |
| CDC        | <b>80.0</b>  | CDC   |
| 01/07/2013 | <b>107.1</b> |       |
| 01/07/2013 | <b>92.4</b>  |       |
| 01/07/2013 | <b>94.3</b>  |       |
| 01/07/2013 | <b>103.9</b> |       |
| CDC        | <b>117.0</b> | CDC   |
| CDC        | <b>102.9</b> | CDC   |
| 01/07/2013 | <b>98.6</b>  |       |
| CDC        | <b>111.9</b> | CDC   |
| CDC        | <b>102.9</b> | CDC   |
| 01/07/2013 | <b>110.3</b> |       |
| 01/07/2013 | <b>107.7</b> |       |
| 01/07/2013 | <b>99.9</b>  |       |
| 01/07/2013 | <b>107.0</b> |       |
| CDC        | <b>96.9</b>  | CDC   |
| CDC        | <b>108.8</b> | CDC   |

|            |              |     |
|------------|--------------|-----|
| 01/07/2013 | <b>107.9</b> |     |
| 01/07/2013 | <b>110.8</b> |     |
| CDC        | <b>113.4</b> | CDC |
| CDC        | <b>108.4</b> | CDC |
| 01/07/2013 | <b>101.5</b> |     |
| 01/07/2013 | <b>103.7</b> |     |
| 01/07/2013 | <b>106.5</b> |     |
| 01/07/2013 | <b>108.8</b> |     |
| 01/07/2013 | <b>100.1</b> |     |
| CDC        | <b>113.2</b> | CDC |
| CDC        | <b>88.2</b>  | CDC |
| 01/07/2013 | <b>109.8</b> |     |
| 01/07/2013 | <b>109.0</b> |     |
| 01/07/2013 | <b>90.9</b>  |     |
| CDC        | <b>87.6</b>  | CDC |
| CDC        | <b>90.7</b>  | CDC |
| 01/07/2013 | <b>93.9</b>  |     |
| 01/07/2013 | <b>113.7</b> |     |
| 01/07/2013 | <b>107.9</b> |     |
| 01/07/2013 | <b>98.1</b>  |     |
| 01/07/2013 | <b>96.1</b>  |     |
| 26/07/2013 | <b>98.8</b>  |     |
| 26/07/2013 | <b>96.4</b>  |     |
| 26/07/2013 | <b>100.8</b> |     |
| 26/07/2013 | <b>93.4</b>  |     |
| 26/07/2013 | <b>94.6</b>  |     |
| 26/07/2013 | <b>97.6</b>  |     |
| 26/07/2013 | <b>94.6</b>  |     |
| 26/07/2013 | <b>97.1</b>  |     |
| 26/07/2013 | <b>94.0</b>  |     |
| 26/07/2013 | <b>96.5</b>  |     |
| 26/07/2013 | <b>97.5</b>  |     |
| 26/07/2013 | <b>94.2</b>  |     |
| 26/07/2013 | <b>97.8</b>  |     |
| 26/07/2013 | <b>92.9</b>  |     |
| 26/07/2013 | <b>91.9</b>  |     |
| 26/07/2013 | <b>103.4</b> |     |
| 26/07/2013 | <b>98.9</b>  |     |
| 26/07/2013 | <b>103.0</b> |     |
| 26/07/2013 | <b>97.0</b>  |     |
| CDC        | <b>108.6</b> | CDC |
| CDC        | <b>88.9</b>  | CDC |
| CDC        | <b>90.4</b>  | CDC |
| CDC        | <b>90.6</b>  | CDC |
| CDC        | <b>97.1</b>  | CDC |
| CDC        | <b>105.0</b> | CDC |
| CDC        | <b>93.6</b>  | CDC |
| CDC        | <b>90.5</b>  | CDC |
| CDC        | <b>112.0</b> | CDC |
| CDC        | <b>93.3</b>  | CDC |



|            |              |      |
|------------|--------------|------|
| CDC        | <b>79.3</b>  |      |
| 16/08/2013 | <b>98.7</b>  | CDC  |
| CDC        | <b>46.0</b>  |      |
| 16/08/2013 | <b>95.0</b>  | CDC  |
| 16/08/2013 | <b>110.5</b> |      |
| 16/08/2013 | <b>88.5</b>  |      |
| CDC        | <b>102.9</b> |      |
| 16/08/2013 | <b>94.4</b>  | CDC  |
| CDC        | <b>110</b>   |      |
| 16/08/2013 | <b>91.7</b>  | CDC  |
| 16/08/2013 | <b>96.8</b>  |      |
| CDC        | <b>108.2</b> |      |
| 16/08/2013 | <b>98.2</b>  | CDC  |
| CDC        | <b>102.6</b> |      |
| 16/08/2013 | <b>104.8</b> | CDC  |
| CDC        | <b>110.6</b> |      |
| 16/08/2013 | <b>93.2</b>  | CDC  |
| CDC        | <b>107.9</b> |      |
| 16/08/2013 | <b>90.4</b>  | CDC  |
| CDC        | <b>113.5</b> |      |
| 16/08/2013 | <b>91.4</b>  | CDC  |
| CDC        | <b>119.6</b> |      |
| 16/08/2013 | <b>96.6</b>  | CDC  |
| CDC        | <b>119.6</b> |      |
| 16/08/2013 | <b>96.4</b>  | CDC  |
| CDC        | <b>108.9</b> |      |
| 16/08/2013 | <b>94.9</b>  | CDC  |
| CDC        | <b>105.8</b> |      |
| 16/08/2013 | <b>103.2</b> | CDC  |
| CDC        | <b>106.3</b> |      |
| 16/08/2013 | <b>91.3</b>  | CDC  |
| CDC        | <b>106.3</b> |      |
| 16/08/2013 | <b>94.6</b>  | CDC  |
| CDC        | <b>102.3</b> |      |
| 16/08/2013 | <b>102.8</b> | CDC  |
| 16/08/2013 | <b>88.0</b>  |      |
| 02/05/2013 | <b>92.9</b>  |      |
| 02/05/2013 | <b>86.1</b>  |      |
| 02/05/2013 | <b>89.1</b>  | 90.7 |
| 02/05/2013 | <b>90.5</b>  |      |
| 02/05/2013 | <b>90.1</b>  |      |
| 02/05/2013 | <b>94.6</b>  |      |
| 02/05/2013 | <b>91.6</b>  |      |
| 02/05/2013 | <b>87.9</b>  |      |
| 02/05/2013 | <b>88.3</b>  |      |
| 02/05/2013 | <b>98.8</b>  |      |
| 02/05/2013 | <b>89.6</b>  |      |
| 02/05/2013 | <b>96.3</b>  |      |
| 02/05/2013 | <b>83.1</b>  |      |
| 02/05/2013 | <b>85.8</b>  |      |

|            |       |       |
|------------|-------|-------|
| 02/05/2013 | 97.5  |       |
| 02/05/2013 | 95.7  |       |
| 02/05/2013 | 94.5  | 72.0  |
| 02/05/2013 | 88.9  |       |
| 02/05/2013 | 95.1  |       |
| 02/05/2013 | 96.4  |       |
| 02/05/2013 | 91.1  |       |
| 02/05/2013 | 91.6  |       |
| 02/05/2013 | 94.5  | 87.5  |
| 02/05/2013 | 90.0  |       |
| 02/05/2013 | 90.8  |       |
| 02/05/2013 | 94.8  |       |
| 02/05/2013 | 86.5  |       |
| 02/05/2013 | 89.7  |       |
| 02/05/2013 | 93.9  |       |
| 02/05/2013 | 89.8  |       |
| 02/05/2013 | 93.0  |       |
| 02/05/2013 | 91.1  |       |
| 02/05/2013 | 96.6  |       |
| 02/05/2013 | 92.2  |       |
| 02/05/2013 | 90.7  |       |
| 02/05/2013 | 85.4  |       |
| 02/05/2013 | 92.0  |       |
| 02/05/2013 | 87.4  |       |
| 02/05/2013 | 95.5  | 106.1 |
| 02/05/2013 | 93.5  |       |
| 02/05/2013 | 93.1  |       |
| 02/05/2013 | 94.8  |       |
| 02/05/2013 | 94.8  | 81.6  |
| 02/05/2013 | 88.0  |       |
| 02/05/2013 | 85.8  |       |
| 02/05/2013 | 86.3  |       |
| 02/05/2013 | 88.3  |       |
| 02/05/2013 | 92.2  |       |
| 02/05/2013 | 89.9  |       |
| 02/05/2013 | 88.4  |       |
| 02/05/2013 | 86.7  |       |
| 02/05/2013 | 84.7  |       |
| 02/05/2013 | 85.1  | 71.4  |
| 02/05/2013 | 88.7  |       |
| 02/05/2013 | 91.7  | 100.7 |
| 02/05/2013 | 92.2  |       |
| 02/05/2013 | 88.6  | 102.2 |
| 02/05/2013 | 96.0  |       |
| 02/05/2013 | 90.2  |       |
| 02/05/2013 | 88.5  |       |
| 02/05/2013 | 100.5 |       |
| 02/05/2013 | 92.2  |       |
| 02/05/2013 | 97.9  |       |
| 02/05/2013 | 85.8  |       |



|            |       |       |
|------------|-------|-------|
| 02/05/2013 | 84.0  |       |
| 02/05/2013 | 71.5  |       |
| 02/05/2013 | 75.9  |       |
| 02/05/2013 | 76.3  |       |
| 02/05/2013 | 87.0  |       |
| 02/05/2013 | 80.4  |       |
| 02/05/2013 | 84.1  |       |
| 02/05/2013 | 80.0  |       |
| 02/05/2013 | 104.8 |       |
| 02/05/2013 | 102.6 |       |
| 03/05/2013 | 101.7 |       |
| 03/05/2013 | 94.5  |       |
| 03/05/2013 | 93.5  |       |
| 03/05/2013 | 90.2  |       |
| 03/05/2013 | 90.0  |       |
| 03/05/2013 | 91.2  |       |
| 03/05/2013 | 90.9  |       |
| 03/05/2013 | 96.0  |       |
| 03/05/2013 | 90.3  |       |
| 03/05/2013 | 93.6  |       |
| 03/05/2013 | 96.3  |       |
| 03/05/2013 | 95.0  |       |
| 03/05/2013 | 96.6  |       |
| 03/05/2013 | 88.8  |       |
| 03/05/2013 | 93.1  |       |
| 03/05/2013 | 94.3  |       |
| 03/05/2013 | 93.6  |       |
| 03/05/2013 | 93.1  |       |
| 03/05/2013 | 93.7  |       |
| 03/05/2013 | 94.7  |       |
| 03/05/2013 | 92.3  |       |
| 03/05/2013 | 95.2  | 109.8 |
| 03/05/2013 | 96.5  |       |
| 03/05/2013 | 92.2  | 105.0 |
| 03/05/2013 | 93.0  |       |
| 03/05/2013 | 95.9  |       |
| 03/05/2013 | 94.9  |       |
| 03/05/2013 | 96.7  |       |
| 03/05/2013 | 97.8  |       |
| 03/05/2013 | 96.5  |       |
| 03/05/2013 | 97.1  |       |
| 03/05/2013 | 96.5  |       |
| 03/05/2013 | 98.4  |       |
| 03/05/2013 | 94.9  |       |
| 03/05/2013 | 94.0  |       |
| 03/05/2013 | 95.9  |       |
| 03/05/2013 | 92.8  |       |
| 03/05/2013 | 96.2  |       |
| 03/05/2013 | 96.7  |       |
| 03/05/2013 | 96.9  |       |

|            |                       |                       |
|------------|-----------------------|-----------------------|
| 03/05/2013 | <b>Not detectable</b> |                       |
| 03/05/2013 | <b>96.0</b>           | 0.0                   |
| 03/05/2013 | <b>96.8</b>           |                       |
| 03/05/2013 | <b>95.5</b>           |                       |
| 03/05/2013 | <b>95.8</b>           |                       |
| 03/05/2013 | <b>98.1</b>           |                       |
| 03/05/2013 | <b>96.5</b>           |                       |
| 03/05/2013 | <b>Not detectable</b> |                       |
| 03/05/2013 | <b>Not detectable</b> | <b>Not detectable</b> |
| 03/05/2013 | <b>97.7</b>           | 0.0                   |
| 03/05/2013 | <b>102.7</b>          |                       |
| 03/05/2013 | <b>97.8</b>           |                       |
| 03/05/2013 | <b>100.8</b>          | 100.7                 |
| 03/05/2013 | <b>92.9</b>           | 98.2                  |
| 03/05/2013 | <b>97.7</b>           |                       |
| 03/05/2013 | <b>94.9</b>           |                       |
| 03/05/2013 | <b>105.1</b>          |                       |
| 03/05/2013 | <b>102.5</b>          |                       |
| 03/05/2013 | <b>100.9</b>          |                       |
| 03/05/2013 | <b>99.4</b>           |                       |
| 03/05/2013 | <b>102.9</b>          |                       |
| 03/05/2013 | <b>95.1</b>           |                       |
| 03/05/2013 | <b>101.0</b>          |                       |
| 03/05/2013 | <b>97.7</b>           |                       |
| 03/05/2013 | <b>105.4</b>          |                       |
| 03/05/2013 | <b>105.7</b>          |                       |
| 03/05/2013 | <b>101.3</b>          |                       |
| 03/05/2013 | <b>102.4</b>          |                       |
| 03/05/2013 | <b>100.9</b>          |                       |
| 03/05/2013 | <b>103.1</b>          |                       |
| 03/05/2013 | <b>108.4</b>          |                       |
| 03/05/2013 | <b>111.5</b>          |                       |
| 03/05/2013 | <b>101.2</b>          |                       |
| 03/05/2013 | <b>105.8</b>          |                       |
| 03/05/2013 | <b>103.3</b>          |                       |
| 03/05/2013 | <b>95.1</b>           |                       |
| 03/05/2013 | <b>107.6</b>          |                       |
| 03/05/2013 | <b>106.6</b>          |                       |
| 03/05/2013 | <b>105.7</b>          |                       |
| 03/05/2013 | <b>87.5</b>           |                       |
| 03/05/2013 | <b>102.7</b>          | 104.8                 |
| 07/05/2013 | <b>99.0</b>           |                       |
| 07/05/2013 | <b>96.8</b>           |                       |
| 07/05/2013 | <b>95.7</b>           |                       |
| 07/05/2013 | <b>92.2</b>           |                       |
| 07/05/2013 | <b>92.3</b>           |                       |
| 07/05/2013 | <b>93.1</b>           |                       |
| 07/05/2013 | <b>95.7</b>           |                       |
| 07/05/2013 | <b>97.9</b>           |                       |
| 07/05/2013 | <b>93.0</b>           |                       |

|            |              |       |
|------------|--------------|-------|
| 07/05/2013 | <b>94.7</b>  |       |
| 07/05/2013 | <b>96.8</b>  |       |
| 07/05/2013 | <b>96.3</b>  |       |
| 07/05/2013 | <b>91.4</b>  |       |
| 07/05/2013 | <b>93.1</b>  |       |
| 07/05/2013 | <b>97.5</b>  |       |
| 07/05/2013 | <b>96.8</b>  |       |
| 07/05/2013 | <b>87.5</b>  |       |
| 07/05/2013 | <b>90.3</b>  |       |
| 07/05/2013 | <b>92.9</b>  |       |
| 07/05/2013 | <b>95.0</b>  | 100.7 |
| 07/05/2013 | <b>89.3</b>  |       |
| 07/05/2013 | <b>93.1</b>  |       |
| 07/05/2013 | <b>96.9</b>  | 92.3  |
| 07/05/2013 | <b>99.6</b>  | 87.9  |
| 07/05/2013 | <b>85.0</b>  |       |
| 07/05/2013 | <b>91.8</b>  |       |
| 07/05/2013 | <b>99.1</b>  |       |
| 07/05/2013 | <b>97.1</b>  |       |
| 07/05/2013 | <b>94.5</b>  |       |
| 07/05/2013 | <b>87.0</b>  |       |
| 07/05/2013 | <b>90.9</b>  |       |
| 07/05/2013 | <b>96.6</b>  |       |
| 07/05/2013 | <b>99.4</b>  |       |
| 07/05/2013 | <b>102.2</b> |       |
| 07/05/2013 | <b>85.3</b>  |       |
| 07/05/2013 | <b>95.9</b>  |       |
| 07/05/2013 | <b>97.8</b>  |       |
| 07/05/2013 | <b>88.6</b>  |       |
| 07/05/2013 | <b>94.6</b>  |       |
| 07/05/2013 | <b>90.3</b>  |       |
| 07/05/2013 | <b>90.9</b>  |       |
| 07/05/2013 | <b>89.6</b>  |       |
| 07/05/2013 | <b>90.4</b>  |       |
| 07/05/2013 | <b>95.0</b>  |       |
| 07/05/2013 | <b>93.8</b>  |       |
| 07/05/2013 | <b>86.9</b>  | 102.9 |
| 07/05/2013 | <b>88.1</b>  |       |
| 07/05/2013 | <b>105.7</b> |       |
| 07/05/2013 | <b>89.9</b>  |       |
| 07/05/2013 | <b>90.6</b>  |       |
| 07/05/2013 | <b>93.5</b>  |       |
| 07/05/2013 | <b>95.5</b>  |       |
| 07/05/2013 | <b>93.6</b>  | 102.5 |
| 07/05/2013 | <b>94.2</b>  | 103.1 |
| 07/05/2013 | <b>97.2</b>  | 103.3 |
| 07/05/2013 | <b>95.0</b>  | 91.5  |
| 07/05/2013 | <b>88.4</b>  |       |
| 07/05/2013 | <b>85.0</b>  |       |
| 07/05/2013 | <b>89.6</b>  |       |

|            |              |       |
|------------|--------------|-------|
| 07/05/2013 | <b>82.6</b>  |       |
| 07/05/2013 | <b>87.9</b>  |       |
| 07/05/2013 | <b>90.8</b>  |       |
| 07/05/2013 | <b>94.8</b>  |       |
| 07/05/2013 | <b>101.6</b> |       |
| 07/05/2013 | <b>87.5</b>  |       |
| 07/05/2013 | <b>91.8</b>  |       |
| 07/05/2013 | <b>90.3</b>  |       |
| 07/05/2013 | <b>92.3</b>  |       |
| 07/05/2013 | <b>94.9</b>  |       |
| 07/05/2013 | <b>90.9</b>  |       |
| 07/05/2013 | <b>90.7</b>  |       |
| 07/05/2013 | <b>93.2</b>  |       |
| 07/05/2013 | <b>88.4</b>  |       |
| 07/05/2013 | <b>92.8</b>  |       |
| 07/05/2013 | <b>90.7</b>  |       |
| 07/05/2013 | <b>85.1</b>  |       |
| 07/05/2013 | <b>90.0</b>  |       |
| 07/05/2013 | <b>99.4</b>  |       |
| 07/05/2013 | <b>88.9</b>  |       |
| 07/05/2013 | <b>95.0</b>  |       |
| 07/05/2013 | <b>92.1</b>  |       |
| 07/05/2013 | <b>91.0</b>  |       |
| 07/05/2013 | <b>90.8</b>  |       |
| 08/05/2013 | <b>106.4</b> |       |
| 08/05/2013 | <b>92.0</b>  |       |
| 08/05/2013 | <b>77.8</b>  |       |
| 08/05/2013 | <b>91.0</b>  |       |
| 08/05/2013 | <b>91.9</b>  |       |
| 08/05/2013 | <b>93.7</b>  |       |
| 08/05/2013 | <b>90.8</b>  |       |
| 08/05/2013 | <b>96.2</b>  | 84.2  |
| 08/05/2013 | <b>90.5</b>  |       |
| 08/05/2013 | <b>91.6</b>  |       |
| 09/05/2013 | <b>100.6</b> |       |
| 09/05/2013 | <b>88.0</b>  |       |
| 09/05/2013 | <b>80.0</b>  |       |
| 09/05/2013 | <b>89.2</b>  | 102.8 |
| 09/05/2013 | <b>85.7</b>  |       |
| 09/05/2013 | <b>90.7</b>  |       |
| 09/05/2013 | <b>85.2</b>  |       |
| 09/05/2013 | <b>91.1</b>  |       |
| 09/05/2013 | <b>89.7</b>  | 78.1  |
| 09/05/2013 | <b>94.0</b>  |       |
| 09/05/2013 | <b>91.0</b>  |       |
| 09/05/2013 | <b>91.7</b>  |       |
| 09/05/2013 | <b>92.1</b>  |       |
| 09/05/2013 | <b>92.7</b>  |       |
| 09/05/2013 | <b>90.9</b>  |       |
| 09/05/2013 | <b>99.6</b>  |       |

|            |              |      |
|------------|--------------|------|
| 09/05/2013 | <b>94.4</b>  |      |
| 09/05/2013 | <b>86.0</b>  |      |
| 09/05/2013 | <b>89.8</b>  |      |
| 09/05/2013 | <b>97.0</b>  |      |
| 09/05/2013 | <b>91.4</b>  |      |
| 09/05/2013 | <b>90.2</b>  | 95.9 |
| 09/05/2013 | <b>92.1</b>  | 85.7 |
| 09/05/2013 | <b>85.5</b>  |      |
| 09/05/2013 | <b>97.1</b>  |      |
| 09/05/2013 | <b>89.0</b>  |      |
| 10/05/2013 | <b>93.6</b>  |      |
| 10/05/2013 | <b>94.2</b>  |      |
| 10/05/2013 | <b>93.5</b>  |      |
| 10/05/2013 | <b>98.6</b>  |      |
| 11/05/2013 | <b>97.2</b>  |      |
| 10/05/2013 | <b>92.6</b>  |      |
| 10/05/2013 | <b>99.5</b>  |      |
| 10/05/2013 | <b>91.6</b>  |      |
| 10/05/2013 | <b>90.2</b>  |      |
| 10/05/2013 | <b>89.2</b>  |      |
| 10/05/2013 | <b>88.2</b>  |      |
| 10/05/2013 | <b>91.5</b>  |      |
| 10/05/2013 | <b>97.6</b>  |      |
| 10/05/2013 | <b>92.8</b>  |      |
| 10/05/2013 | <b>95.0</b>  |      |
| 10/05/2013 | <b>99.7</b>  |      |
| 10/05/2013 | <b>93.4</b>  |      |
| 10/05/2013 | <b>92.3</b>  |      |
| 10/05/2013 | <b>94.6</b>  |      |
| 10/05/2013 | <b>93.0</b>  |      |
| 10/05/2013 | <b>93.8</b>  |      |
| 10/05/2013 | <b>96.2</b>  |      |
| 10/05/2013 | <b>91.2</b>  |      |
| 10/05/2013 | <b>94.8</b>  |      |
| 10/05/2013 | <b>94.6</b>  |      |
| 10/05/2013 | <b>91.9</b>  |      |
| 10/05/2013 | <b>103.1</b> |      |
| 10/05/2013 | <b>97.0</b>  |      |
| 10/05/2013 | <b>96.2</b>  | 68.7 |
| 10/05/2013 | <b>90.4</b>  |      |
| 10/05/2013 | <b>108.3</b> |      |
| 10/05/2013 | <b>100.6</b> |      |
| 10/05/2013 | <b>98.2</b>  |      |
| 10/05/2013 | <b>95.7</b>  |      |
| 10/05/2013 | <b>112.2</b> |      |
| 10/05/2013 | <b>105.5</b> |      |
| 10/05/2013 | <b>113.8</b> |      |
| 10/05/2013 | <b>91.9</b>  |      |
| 10/05/2013 | <b>98.7</b>  |      |
| 10/05/2013 | <b>95.2</b>  |      |

|            |              |       |
|------------|--------------|-------|
| 10/05/2013 | <b>111.1</b> | 70.6  |
| 10/05/2013 | <b>94.3</b>  |       |
| 10/05/2013 | <b>108.1</b> |       |
| 10/05/2013 | <b>99.0</b>  |       |
| 10/05/2013 | <b>112.4</b> |       |
| 10/05/2013 | <b>98.8</b>  | 105.1 |
| 10/05/2013 | <b>113.7</b> |       |
| 10/05/2013 | <b>108.7</b> |       |
| 10/05/2013 | <b>98.8</b>  |       |
| 10/05/2013 | <b>99.3</b>  |       |
| 10/05/2013 | <b>95.9</b>  | 112.4 |
| 10/05/2013 | <b>105.1</b> |       |
| 10/05/2013 | <b>97.3</b>  | 81.8  |
| 10/05/2013 | <b>97.3</b>  |       |
| 10/05/2013 | <b>100.0</b> |       |
| 10/05/2013 | <b>96.3</b>  |       |
| 10/05/2013 | <b>106.1</b> |       |
| 10/05/2013 | <b>109.1</b> |       |
| 10/05/2013 | <b>111.4</b> |       |
| 10/05/2013 | <b>93.7</b>  | 94.5  |
| 10/05/2013 | <b>95.3</b>  |       |
| 14/05/2013 | <b>87.2</b>  |       |
| 14/05/2013 | <b>92.0</b>  |       |
| 14/05/2013 | <b>91.8</b>  |       |
| 14/05/2013 | <b>88.1</b>  |       |
| 14/05/2013 | <b>98.4</b>  |       |
| 14/05/2013 | <b>92.1</b>  |       |
| 14/05/2013 | <b>96.5</b>  | 95.2  |
| 14/05/2013 | <b>99.3</b>  |       |
| 14/05/2013 | <b>109.5</b> |       |
| 14/05/2013 | <b>110.3</b> |       |
| 14/05/2013 | <b>109.3</b> |       |
| 14/05/2013 | <b>98.2</b>  |       |
| 14/05/2013 | <b>100.5</b> |       |
| 14/05/2013 | <b>111.6</b> |       |
| 14/05/2013 | <b>103.3</b> |       |
| 14/05/2013 | <b>111.7</b> |       |
| 14/05/2013 | <b>111.0</b> |       |
| 14/05/2013 | <b>105.5</b> |       |
| 14/05/2013 | <b>101.4</b> |       |
| 14/05/2013 | <b>106.6</b> |       |
| 14/05/2013 | <b>110.4</b> |       |
| 14/05/2013 | <b>94.0</b>  |       |
| 14/05/2013 | <b>105.0</b> |       |
| 14/05/2013 | <b>107.3</b> |       |
| 14/05/2013 | <b>97.3</b>  |       |
| 14/05/2013 | <b>99.5</b>  |       |
| 14/05/2013 | <b>102.0</b> |       |
| 14/05/2013 | <b>91.5</b>  |       |
| 14/05/2013 | <b>99.6</b>  |       |

|            |              |       |
|------------|--------------|-------|
| 14/05/2013 | <b>103.2</b> |       |
| 14/05/2013 | <b>102.6</b> |       |
| 14/05/2013 | <b>102.1</b> |       |
| 14/05/2013 | <b>111.9</b> |       |
| 14/05/2013 | <b>103.3</b> |       |
| 14/05/2013 | <b>103.7</b> |       |
| 14/05/2013 | <b>102.9</b> |       |
| 14/05/2013 | <b>103.1</b> |       |
| 14/05/2013 | <b>107.7</b> |       |
| 14/05/2013 | <b>108.4</b> |       |
| 14/05/2013 | <b>105.1</b> |       |
| 14/05/2013 | <b>100.1</b> |       |
| 14/05/2013 | <b>108.0</b> |       |
| 14/05/2013 | <b>106.5</b> | 93.8  |
| 14/05/2013 | <b>94.0</b>  |       |
| 14/05/2013 | <b>108.4</b> |       |
| 15/05/2013 | <b>110.4</b> |       |
| 15/05/2013 | <b>104.2</b> |       |
| 15/05/2013 | <b>101.6</b> |       |
| 15/05/2013 | <b>97.0</b>  |       |
| 15/05/2013 | <b>97.8</b>  |       |
| 15/05/2013 | <b>90.0</b>  |       |
| 15/05/2013 | <b>105.0</b> |       |
| 15/05/2013 | <b>96.1</b>  |       |
| 15/05/2013 | <b>97.1</b>  |       |
| 15/05/2013 | <b>100.3</b> |       |
| 15/05/2013 | <b>95.3</b>  |       |
| 15/05/2013 | <b>98.8</b>  |       |
| 15/05/2013 | <b>102.6</b> |       |
| 15/05/2013 | <b>95.2</b>  |       |
| 15/05/2013 | <b>103.9</b> |       |
| 15/05/2013 | <b>100.7</b> |       |
| 15/05/2013 | <b>94.6</b>  |       |
| 15/05/2013 | <b>96.6</b>  |       |
| 15/05/2013 | <b>100.0</b> |       |
| 15/05/2013 | <b>89.6</b>  |       |
| 15/05/2013 | <b>108.9</b> |       |
| 15/05/2013 | <b>102.2</b> |       |
| 15/05/2013 | <b>94.5</b>  |       |
| 15/05/2013 | <b>100.3</b> |       |
| 15/05/2013 | <b>93.6</b>  |       |
| 15/05/2013 | <b>100.8</b> |       |
| 15/05/2013 | <b>100.1</b> | 94.1  |
| 15/05/2013 | <b>84.3</b>  |       |
| 15/05/2013 | <b>99.8</b>  | 106.4 |
| 15/05/2013 | <b>104.0</b> | 102.3 |
| 15/05/2013 | <b>105.5</b> |       |
| 15/05/2013 | <b>95.6</b>  | 99.1  |
| 15/05/2013 | <b>95.4</b>  |       |
| 15/05/2013 | <b>102.1</b> |       |

|            |              |       |
|------------|--------------|-------|
| 15/05/2013 | <b>106.5</b> |       |
| 15/05/2013 | <b>103.9</b> |       |
| 15/05/2013 | <b>100.1</b> |       |
| 15/05/2013 | <b>101.3</b> |       |
| 15/05/2013 | <b>103.3</b> | 100.9 |
| 15/05/2013 | <b>98.4</b>  | 100.0 |
| 15/05/2013 | <b>102.8</b> |       |
| 15/05/2013 | <b>100.5</b> |       |
| 15/05/2013 | <b>103.9</b> |       |
| 15/05/2013 | <b>100.3</b> |       |
| 15/05/2013 | <b>110.3</b> |       |
| 15/05/2013 | <b>105.0</b> |       |
| 15/05/2013 | <b>105.8</b> |       |
| 15/05/2013 | <b>97.7</b>  |       |
| 15/05/2013 | <b>95.8</b>  | 99.9  |
| 15/05/2013 | <b>92.3</b>  |       |
| 15/05/2013 | <b>100.1</b> |       |
| 15/05/2013 | <b>94.4</b>  |       |
| 15/05/2013 | <b>93.8</b>  |       |
| 15/05/2013 | <b>101.5</b> | 109.1 |
| 15/05/2013 | <b>105.5</b> |       |
| 15/05/2013 | <b>98.9</b>  |       |
| 15/05/2013 | <b>100.1</b> |       |
| 15/05/2013 | <b>93.8</b>  |       |
| 15/05/2013 | <b>92.8</b>  |       |
| 15/05/2013 | <b>94.9</b>  |       |
| 15/05/2013 | <b>97.1</b>  |       |
| 15/05/2013 | <b>99.5</b>  |       |
| 15/05/2013 | <b>92.1</b>  |       |
| 15/05/2013 | <b>95.0</b>  |       |
| 15/05/2013 | <b>106.1</b> |       |
| 15/05/2013 | <b>99.2</b>  |       |
| 15/05/2013 | <b>102.0</b> |       |
| 15/05/2013 | <b>96.0</b>  |       |
| 15/05/2013 | <b>104.6</b> |       |
| 15/05/2013 | <b>97.1</b>  |       |
| 15/05/2013 | <b>94.6</b>  |       |
| 15/05/2013 | <b>91.0</b>  |       |
| 15/05/2013 | <b>93.7</b>  |       |
| 15/05/2013 | <b>104.9</b> |       |
| 15/05/2013 | <b>99.7</b>  |       |
| 16/05/2013 | <b>85.3</b>  |       |
| 16/05/2013 | <b>93.9</b>  |       |
| 16/05/2013 | <b>94.9</b>  |       |
| 16/05/2013 | <b>96.1</b>  |       |
| 16/05/2013 | <b>94.9</b>  |       |
| 16/05/2013 | <b>92.3</b>  |       |
| 16/05/2013 | <b>90.4</b>  |       |
| 16/05/2013 | <b>94.2</b>  |       |
| 16/05/2013 | <b>91.9</b>  |       |



|            |              |       |
|------------|--------------|-------|
| 16/05/2013 | <b>97.6</b>  |       |
| 16/05/2013 | <b>86.4</b>  |       |
| 16/05/2013 | <b>99.5</b>  |       |
| 16/05/2013 | <b>96.5</b>  |       |
| 16/05/2013 | <b>98.3</b>  |       |
| 16/05/2013 | <b>88.2</b>  |       |
| 16/05/2013 | <b>89.2</b>  |       |
| 16/05/2013 | <b>85.0</b>  |       |
| 16/05/2013 | <b>101.1</b> | 96.3  |
| 16/05/2013 | <b>88.0</b>  |       |
| 16/05/2013 | <b>94.7</b>  |       |
| 16/05/2013 | <b>92.5</b>  |       |
| 16/05/2013 | <b>92.3</b>  |       |
| 16/05/2013 | <b>95.8</b>  |       |
| 16/05/2013 | <b>89.7</b>  |       |
| 16/05/2013 | <b>94.6</b>  |       |
| 16/05/2013 | <b>88.5</b>  |       |
| 16/05/2013 | <b>87.2</b>  |       |
| 16/05/2013 | <b>89.6</b>  |       |
| 16/05/2013 | <b>85.5</b>  |       |
| 16/05/2013 | <b>87.5</b>  |       |
| 16/05/2013 | <b>92.4</b>  | 99.5  |
| 16/05/2013 | <b>91.5</b>  |       |
| 16/05/2013 | <b>88.1</b>  | 99.3  |
| 16/05/2013 | <b>87.0</b>  |       |
| 16/05/2013 | <b>89.6</b>  |       |
| 16/05/2013 | <b>93.7</b>  |       |
| 16/05/2013 | <b>92.7</b>  |       |
| 16/05/2013 | <b>85.5</b>  |       |
| 16/05/2013 | <b>88.8</b>  |       |
| 16/05/2013 | <b>90.9</b>  | 86.4  |
| 16/05/2013 | <b>95.6</b>  |       |
| 16/05/2013 | <b>97.5</b>  | 91.3  |
| 16/05/2013 | <b>89.5</b>  |       |
| 16/05/2013 | <b>88.7</b>  |       |
| 16/05/2013 | <b>91.0</b>  |       |
| 16/05/2013 | <b>96.4</b>  |       |
| 16/05/2013 | <b>86.9</b>  | 92.7  |
| 16/05/2013 | <b>86.2</b>  | 100.0 |
| 16/05/2013 | <b>93.2</b>  |       |
| 16/05/2013 | <b>85.4</b>  |       |
| 16/05/2013 | <b>85.7</b>  |       |
| 16/05/2013 | <b>90.3</b>  |       |
| 16/05/2013 | <b>84.1</b>  |       |
| 16/05/2013 | <b>100.3</b> |       |
| 16/05/2013 | <b>86.2</b>  |       |
| 16/05/2013 | <b>85.3</b>  | 79.6  |
| 16/05/2013 | <b>96.6</b>  |       |
|            | -            |       |
|            | -            |       |



|            |              |       |
|------------|--------------|-------|
| 06/06/2013 | <b>107.7</b> |       |
| 06/06/2013 | <b>94.0</b>  |       |
| 06/06/2013 | <b>85.1</b>  |       |
| 06/06/2013 | <b>105.5</b> |       |
| 06/06/2013 | <b>109.2</b> |       |
| 06/06/2013 | <b>112.8</b> | 92.4  |
| 06/06/2013 | <b>106.9</b> |       |
| 06/06/2013 | <b>114.2</b> |       |
| 06/06/2013 | <b>112.0</b> |       |
| 06/06/2013 | <b>115.0</b> | 96.2  |
| 06/06/2013 | <b>113.5</b> |       |
| 06/06/2013 | <b>111.3</b> |       |
| 06/06/2013 | <b>105.7</b> |       |
| 06/06/2013 | <b>109.5</b> |       |
| 06/06/2013 | <b>105.8</b> |       |
| 06/06/2013 | <b>101.7</b> |       |
| 06/06/2013 | <b>107.7</b> |       |
| 06/06/2013 | <b>104.3</b> |       |
| 06/06/2013 | <b>114.9</b> |       |
| 06/06/2013 | <b>107.3</b> |       |
| 06/06/2013 | <b>103.1</b> |       |
| 06/06/2013 | <b>101.8</b> |       |
| 06/06/2013 | <b>105.6</b> |       |
| 06/06/2013 | <b>105.1</b> | 100.6 |
| 06/06/2013 | <b>112.9</b> |       |
| 06/06/2013 | <b>112.9</b> |       |
| 06/06/2013 | <b>107.6</b> |       |
| 06/06/2013 | <b>103.3</b> |       |
| 06/06/2013 | <b>109.0</b> |       |
| 06/06/2013 | <b>114.6</b> | 101.1 |
| 06/06/2013 | <b>113.7</b> |       |
| 06/06/2013 | <b>113.3</b> |       |
| 06/06/2013 | <b>91.2</b>  |       |
| 06/06/2013 | <b>88.2</b>  |       |
| 06/06/2013 | <b>94.4</b>  |       |
| 06/06/2013 | <b>98.8</b>  |       |
| 06/06/2013 | <b>93.0</b>  |       |
| 06/06/2013 | <b>95.8</b>  | 102.0 |
| 06/06/2013 | <b>87.1</b>  |       |
| 06/06/2013 | <b>99.2</b>  |       |
| 06/06/2013 | <b>97.4</b>  |       |
| 06/06/2013 | <b>96.4</b>  |       |
| 06/06/2013 | <b>90.3</b>  |       |
| 06/06/2013 | <b>90.3</b>  |       |
| 06/06/2013 | <b>91.1</b>  | 98.0  |
| 06/06/2013 | <b>92.1</b>  | 95.0  |
| 06/06/2013 | <b>94.6</b>  |       |
| 06/06/2013 | <b>90.2</b>  |       |
| 06/06/2013 | <b>91.0</b>  | 94.0  |
| 06/06/2013 | <b>93.1</b>  |       |

|            |       |             |            |
|------------|-------|-------------|------------|
| 06/06/2013 | 99.9  |             |            |
| 06/06/2013 | 97.4  |             |            |
| 06/06/2013 | 100.7 |             |            |
| 06/06/2013 | 95.8  |             |            |
| 06/06/2013 | 94.3  |             |            |
| 06/06/2013 | 95.1  |             |            |
| 06/06/2013 | 89.4  |             |            |
| 06/06/2013 | 99.0  |             |            |
| 06/06/2013 | 97.9  |             |            |
| 06/06/2013 | 95.6  | 89.0        |            |
| 06/06/2013 | 94.4  | 90.0        |            |
| 24/06/2013 | 99.2  |             |            |
| 24/06/2013 | 106.0 |             |            |
| 24/06/2013 | 98.2  |             |            |
| 24/06/2013 | 94.7  |             |            |
| 24/06/2013 | 95.2  |             |            |
| 24/06/2013 | 96.1  |             |            |
| 24/06/2013 | 96.0  |             |            |
| 24/06/2013 | 101.3 |             |            |
| 24/06/2013 | 97.3  |             |            |
| 24/06/2013 | 92.5  |             |            |
| 24/06/2013 | 96.0  |             |            |
| 24/06/2013 | 102.9 |             |            |
| 24/06/2013 | 96.3  |             |            |
| 24/06/2013 | 97.1  |             |            |
| 24/06/2013 | 93.4  |             |            |
| 24/06/2013 | 86.9  |             |            |
| 24/06/2013 | 91.1  |             |            |
| 24/06/2013 | 93.8  |             |            |
| 24/06/2013 | 90.1  |             |            |
| 24/06/2013 | 91.0  |             |            |
| 24/06/2013 | 88.1  |             |            |
| 24/06/2013 | 96.3  |             |            |
| 24/06/2013 | 95.7  |             |            |
| 24/06/2013 | 97.4  |             |            |
| 24/06/2013 | 92.3  |             |            |
| 25/06/2013 | 92.4  | pyrime 25   | 25/06/2013 |
| 25/06/2013 | 87.7  | pyrime 25   | 25/06/2013 |
| 25/06/2013 | 90.0  | pyrime 25   | 25/06/2013 |
| 25/06/2013 | 106.5 | pyrime 25   | 25/06/2013 |
| 25/06/2013 | 97.1  | pyrime 12.5 | 25/06/2013 |
| 25/06/2013 | 90.2  | pyrime 12.5 | 25/06/2013 |
| 25/06/2013 | 92.8  | pyrime 12.5 | 25/06/2013 |
| 25/06/2013 | 93.4  | pyrime 12.5 | 25/06/2013 |
| 25/06/2013 | 94.1  | pyrime 12.5 | 25/06/2013 |
| 25/06/2013 | 93.1  | pyrime 12.5 | 25/06/2013 |
| 25/06/2013 | 94.2  | pyrime 25   | 25/06/2013 |
| 25/06/2013 | 109.1 | pyrime 25   | 25/06/2013 |
| 25/06/2013 | 90.1  | pyrime 25   | 25/06/2013 |
| 25/06/2013 | 96.8  | pyrime 25   | 25/06/2013 |

|            |                |      |           |            |
|------------|----------------|------|-----------|------------|
| 25/06/2013 | 94.6           |      | pyrime 25 | 25/06/2013 |
| 25/06/2013 | 97.7           |      | pyrime 25 | 25/06/2013 |
| 25/06/2013 | 93.2           |      | pyrime 25 | 25/06/2013 |
| 25/06/2013 | 95.8           |      | pyrime 25 | 25/06/2013 |
| 25/06/2013 | 108.5          |      | pyrime 25 | 25/06/2013 |
| 25/06/2013 | 91.7           |      | pyrime 25 | 25/06/2013 |
| 25/06/2013 | 97.6           |      | pyrime 25 | 25/06/2013 |
| 25/06/2013 | 100.2          |      | pyrime 25 | 25/06/2013 |
| 25/06/2013 | 90.1           |      | pyrime 25 | 25/06/2013 |
| 25/06/2013 | 98.3           |      | pyrime 25 | 25/06/2013 |
| 25/06/2013 | 99.1           |      | pyrime 25 | 25/06/2013 |
|            | -              |      |           |            |
| 25/04/2013 | 91.5           |      |           |            |
| 25/04/2013 | 97.5           |      |           |            |
| 25/04/2013 | 98.2           | 85.6 |           |            |
| 25/04/2013 | 96.0           |      |           |            |
| 25/04/2013 | 111.0          | 92.5 |           |            |
| 25/04/2013 | 98.8           |      |           |            |
| 25/04/2013 | Not detectable |      |           |            |
| 25/04/2013 | 105.4          | 0.0  |           |            |
| 25/04/2013 | 112.7          |      |           |            |
| 25/04/2013 | 112.3          |      |           |            |
| 25/04/2013 | 104.2          |      |           |            |
| 25/04/2013 | 100.3          |      |           |            |
| 25/04/2013 | 109.4          |      |           |            |
| 25/04/2013 | 104.6          |      |           |            |
| 25/04/2013 | 98.5           |      |           |            |
| 25/04/2013 | 102.0          |      |           |            |
| 25/04/2013 | 111.3          |      |           |            |
| 25/04/2013 | 103.6          |      |           |            |
| 25/04/2013 | 102.2          |      |           |            |
| 25/04/2013 | 96.6           |      |           |            |
| 25/04/2013 | 109.4          |      |           |            |
| 25/04/2013 | Not detectable |      |           |            |
| 25/04/2013 | 99.5           | 0.0  |           |            |
| 25/04/2013 | Not detectable |      |           |            |
| 25/04/2013 | 114.7          | 0.0  |           |            |
| 25/04/2013 | 85.4           |      |           |            |
| 25/04/2013 | 92.7           |      |           |            |
| 25/04/2013 | 100.8          |      |           |            |
| 25/04/2013 | 96.1           |      |           |            |
| 25/04/2013 | 113.9          |      |           |            |
| 25/04/2013 | 94.2           |      |           |            |
| 25/04/2013 | 101.0          |      |           |            |
| 25/04/2013 | Not detectable |      |           |            |
| 25/04/2013 | 105.9          | 0.0  |           |            |
| 25/04/2013 | 114.2          |      |           |            |
| 25/04/2013 | 114.5          |      |           |            |
| 25/04/2013 | 99.7           |      |           |            |
| 25/04/2013 | 106.3          |      |           |            |

|            |              |       |            |
|------------|--------------|-------|------------|
| 25/04/2013 | <b>107.0</b> |       |            |
| 25/04/2013 | <b>100.7</b> | 83.1  |            |
| 25/04/2013 | <b>116.9</b> | 85.0  |            |
| 25/04/2013 | <b>100.6</b> |       |            |
| 25/04/2013 | <b>113.7</b> |       |            |
| 25/04/2013 | <b>95.2</b>  |       |            |
| 25/04/2013 | <b>114.1</b> |       |            |
| 25/04/2013 | <b>114.1</b> |       |            |
| 25/04/2013 | <b>107.8</b> |       |            |
| 25/04/2013 | <b>91.9</b>  |       |            |
| 25/04/2013 | <b>97.4</b>  |       |            |
| 25/04/2013 | <b>110.7</b> |       |            |
| 25/04/2013 | <b>107.8</b> |       |            |
| 25/04/2013 | <b>101.0</b> |       |            |
| 25/04/2013 | <b>106.1</b> |       |            |
| 25/04/2013 | <b>105.9</b> |       |            |
| 25/04/2013 | <b>109.3</b> | 80.6  |            |
| 25/04/2013 | <b>101.7</b> | 80.8  |            |
| 25/04/2013 | <b>101.8</b> |       |            |
| 25/04/2013 | <b>109.4</b> |       |            |
| 25/04/2013 | <b>106.1</b> |       |            |
| 25/04/2013 | <b>106.3</b> |       |            |
| 25/04/2013 | <b>108.5</b> |       |            |
| 25/04/2013 | <b>109.6</b> | 80.4  |            |
| 25/04/2013 | <b>100.0</b> |       |            |
| 25/04/2013 | <b>112.1</b> |       |            |
| 25/04/2013 | <b>113.7</b> |       |            |
| 25/04/2013 | <b>103.5</b> |       |            |
| 25/04/2013 | <b>99.9</b>  |       |            |
| 25/04/2013 | <b>106.4</b> |       |            |
| 25/04/2013 | <b>100.3</b> |       |            |
| 01/05/2013 | <b>104.6</b> |       | trimetř 90 |
| 01/05/2013 | <b>106.4</b> |       | trimetř 90 |
| 01/05/2013 | <b>96.0</b>  |       | trimetř 90 |
| 01/05/2013 | <b>95.6</b>  |       | trimetř 90 |
| 01/05/2013 | <b>94.5</b>  | 77.1  |            |
| 01/05/2013 | <b>90.1</b>  |       |            |
| 01/05/2013 | <b>98.7</b>  | 100.9 |            |
| 01/05/2013 | <b>86.9</b>  |       |            |
| 01/05/2013 | <b>89.1</b>  | 96.0  |            |
| 01/05/2013 | <b>98.8</b>  |       |            |
| 01/05/2013 | <b>96.5</b>  |       |            |
| 30/04/2013 | <b>95.2</b>  |       |            |
| 30/04/2013 | <b>91.0</b>  |       |            |
| 30/04/2013 | <b>96.9</b>  |       |            |
| 30/04/2013 | <b>112.3</b> |       |            |
| 30/04/2013 | <b>88.5</b>  |       |            |
| 30/04/2013 | <b>107.2</b> |       |            |
| 30/04/2013 | <b>101.1</b> |       |            |
| 30/04/2013 | <b>109.9</b> |       |            |

|            |              |
|------------|--------------|
| 30/04/2013 | <b>94.7</b>  |
| 30/04/2013 | <b>107.6</b> |
| 30/04/2013 | <b>106.5</b> |
| 30/04/2013 | <b>106.8</b> |
| 30/04/2013 | <b>107.8</b> |
| 30/04/2013 | <b>97.1</b>  |
| 30/04/2013 | <b>92.4</b>  |
| 30/04/2013 | <b>101.7</b> |
| 30/04/2013 | <b>94.9</b>  |
| 30/04/2013 | <b>101.8</b> |
| 30/04/2013 | <b>109.6</b> |
| 30/04/2013 | <b>105.0</b> |
| 30/04/2013 | <b>95.9</b>  |
| 30/04/2013 | <b>112.8</b> |
| 30/04/2013 | <b>113.8</b> |
| 30/04/2013 | <b>106.8</b> |
| 30/04/2013 | <b>84.1</b>  |
| 30/04/2013 | <b>97.3</b>  |
| 30/04/2013 | <b>108.6</b> |
| 30/04/2013 | <b>106.2</b> |
| 30/04/2013 | <b>86.4</b>  |
| 30/04/2013 | <b>93.2</b>  |
| 30/04/2013 | <b>96.7</b>  |
| 30/04/2013 | <b>91.6</b>  |
| 30/04/2013 | <b>95.4</b>  |
| 30/04/2013 | <b>97.7</b>  |
| 30/04/2013 | <b>96.3</b>  |
| 30/04/2013 | <b>111.3</b> |
| 30/04/2013 | <b>94.9</b>  |
| 30/04/2013 | <b>99.4</b>  |
| 30/04/2013 | <b>114.9</b> |
| 30/04/2013 | <b>111.0</b> |
| 30/04/2013 | <b>94.8</b>  |
| 30/04/2013 | <b>91.1</b>  |
| 30/04/2013 | <b>87.7</b>  |
| 30/04/2013 | <b>94.4</b>  |
| 30/04/2013 | <b>112.1</b> |
| 30/04/2013 | <b>110.6</b> |
| 30/04/2013 | <b>92.6</b>  |
| 01/05/2013 | <b>97.0</b>  |
| 01/05/2013 | <b>87.6</b>  |
| 01/05/2013 | <b>98.6</b>  |
| 01/05/2013 | <b>101.3</b> |
| 01/05/2013 | <b>100.6</b> |
| 17/05/2013 | <b>96.5</b>  |
| 17/05/2013 | <b>52.8</b>  |
| 17/05/2013 | <b>98.7</b>  |
| 17/05/2013 | <b>92.8</b>  |
| 02/08/2013 | <b>97.8</b>  |
| CDC        | <b>85.7</b>  |

|            |              |     |
|------------|--------------|-----|
| 02/08/2013 | <b>97.9</b>  | CDC |
| CDC        | <b>87</b>    |     |
| 02/08/2013 | <b>100.0</b> | CDC |
| CDC        | <b>91.4</b>  |     |
| 02/08/2013 | <b>98.1</b>  | CDC |
| 02/08/2013 | <b>97.2</b>  |     |
| CDC        | <b>88.9</b>  |     |
| 02/08/2013 | <b>99.2</b>  | CDC |
| 02/08/2013 | <b>81.1</b>  |     |
| CDC        | <b>94.9</b>  |     |
| 02/08/2013 | <b>90.1</b>  | CDC |
| 02/08/2013 | <b>98.1</b>  |     |
| 02/08/2013 | <b>99.0</b>  |     |
| CDC        | <b>87</b>    |     |
| 02/08/2013 | <b>95.5</b>  | CDC |
| CDC        | <b>97</b>    |     |
| 02/08/2013 | <b>99.4</b>  | CDC |
| CDC        | <b>89.3</b>  |     |
| 02/08/2013 | <b>99.4</b>  | CDC |
| 02/08/2013 | <b>99.8</b>  |     |
| CDC        | <b>92.6</b>  |     |
| 02/08/2013 | <b>99.6</b>  | CDC |
| CDC        | <b>90.9</b>  |     |
| 02/08/2013 | <b>102.3</b> | CDC |
| CDC        | <b>90.3</b>  |     |
| 02/08/2013 | <b>100.1</b> | CDC |
| CDC        | <b>88.9</b>  |     |
| 02/08/2013 | <b>100.3</b> | CDC |
| 02/08/2013 | <b>99.8</b>  |     |
| 02/08/2013 | <b>84.1</b>  |     |
| 02/08/2013 | <b>87.5</b>  |     |
| CDC        | <b>85.0</b>  |     |
| 02/08/2013 | <b>95.5</b>  | CDC |
| CDC        | <b>89</b>    |     |
| 02/08/2013 | <b>97.1</b>  | CDC |
| 02/08/2013 | <b>88.1</b>  |     |
| 02/08/2013 | <b>95.6</b>  |     |
| CDC        | <b>90.2</b>  |     |
| 02/08/2013 | <b>87.9</b>  | CDC |
| CDC        | <b>89</b>    |     |
| 02/08/2013 | <b>93.4</b>  | CDC |
| 02/08/2013 | <b>106.1</b> |     |
| 02/08/2013 | <b>97.0</b>  |     |
| 05/08/2013 | <b>110.6</b> |     |
| 05/08/2013 | <b>109.1</b> |     |
| CDC        | <b>107.4</b> |     |
| 05/08/2013 | <b>104.5</b> | CDC |
| CDC        | <b>100.9</b> |     |
| 05/08/2013 | <b>105.7</b> | CDC |
| CDC        | <b>105.8</b> |     |



|            |              |     |
|------------|--------------|-----|
| 05/08/2013 | <b>89.5</b>  | CDC |
| CDC        | <b>105.8</b> |     |
| 05/08/2013 | <b>112.6</b> | CDC |
| 05/08/2013 | <b>109.3</b> |     |
| 05/08/2013 | <b>106.9</b> |     |
| CDC        | <b>96.6</b>  |     |
| 05/08/2013 | <b>103.1</b> | CDC |
| 05/08/2013 | <b>110.4</b> |     |
| CDC        | <b>98.6</b>  |     |
| 05/08/2013 | <b>113.0</b> | CDC |
| CDC        | <b>83.6</b>  |     |
| 05/08/2013 | <b>110.8</b> | CDC |
| CDC        | <b>93.0</b>  |     |
| 05/08/2013 | <b>86.4</b>  | CDC |
| CDC        | <b>101.0</b> |     |
| 05/08/2013 | <b>109.5</b> | CDC |
| CDC        | <b>101.1</b> |     |
| 05/08/2013 | <b>110.0</b> | CDC |
| CDC        | <b>110.2</b> |     |
| 05/08/2013 | <b>111.4</b> | CDC |
| CDC        | <b>104.4</b> |     |
| 05/08/2013 | <b>114.0</b> | CDC |
| CDC        | <b>103.1</b> |     |
| 05/08/2013 | <b>106.6</b> | CDC |
| CDC        | <b>89.7</b>  |     |
| 05/08/2013 | <b>109.3</b> | CDC |
| CDC        | <b>102.5</b> |     |
| 05/08/2013 | <b>109.9</b> | CDC |
| 05/08/2013 | <b>97.1</b>  |     |
| 06/06/2013 | <b>27.9</b>  |     |
| 06/06/2013 | <b>28.3</b>  |     |
| 06/06/2013 | <b>28.5</b>  |     |
| 06/06/2013 | <b>26.6</b>  |     |
| 06/06/2013 | <b>32.4</b>  |     |
| 06/06/2013 | <b>29.2</b>  |     |
| 06/06/2013 | <b>35.0</b>  |     |
| 06/06/2013 | <b>32.2</b>  |     |
| 06/06/2013 | <b>41.7</b>  |     |
| 06/06/2013 | <b>39.9</b>  |     |
| 06/06/2013 | <b>38.4</b>  |     |
| 06/06/2013 | <b>106.2</b> |     |
|            | -            |     |
|            | -            |     |
|            | -            |     |
|            | -            |     |
|            | -            |     |
|            | -            |     |
| -          | -            |     |
| -          | -            |     |
|            | -            |     |

|            |              |     |
|------------|--------------|-----|
|            | -            |     |
|            | -            |     |
|            | -            |     |
|            | -            |     |
|            | -            |     |
|            | -            |     |
|            | -            |     |
|            | -            |     |
|            | -            |     |
| 16/08/2013 | <b>102.8</b> |     |
| 16/08/2013 | <b>99.1</b>  |     |
| 16/08/2013 | <b>101.9</b> |     |
| CDC        | <b>94.7</b>  |     |
| 16/08/2013 | <b>94.8</b>  | CDC |
| 16/08/2013 | <b>93.3</b>  |     |
| CDC        | <b>97.8</b>  |     |
| 16/08/2013 | <b>95.1</b>  | CDC |
| CDC        | <b>87.3</b>  |     |
| 16/08/2013 | <b>102.3</b> | CDC |
| CDC        | <b>92.2</b>  |     |
| 16/08/2013 | <b>94.0</b>  | CDC |
| 16/08/2013 | <b>94.8</b>  |     |
| 16/08/2013 | <b>89.7</b>  |     |
| CDC        | <b>96.6</b>  |     |
| 16/08/2013 | <b>90.7</b>  | CDC |
| CDC        | <b>94.8</b>  |     |
| 16/08/2013 | <b>84.3</b>  | CDC |
| 16/08/2013 | <b>90.6</b>  |     |
| CDC        | <b>95</b>    |     |
| 16/08/2013 | <b>102.9</b> | CDC |
| CDC        | <b>93.2</b>  |     |
| 16/08/2013 | <b>102.2</b> | CDC |
| CDC        | <b>90.5</b>  |     |

| mfddate | expdate | packsize | retailprice | comments |
|---------|---------|----------|-------------|----------|
| XXXXXX  | XXXXXX  | 24       | 9999999     |          |
| XXXXXX  | XXXXXX  | 24       | 600         |          |
| XXXXXX  | XXXXXX  | 24       | 550         |          |
| XXXXXX  | XXXXXX  | 24       | 550         |          |
| XXXXXX  | XXXXXX  | 24       | 450         |          |
| XXXXXX  | XXXXXX  | 24       | 550         |          |
| XXXXXX  | XXXXXX  | 24       | 250         |          |
| XXXXXX  | XXXXXX  | 24       | 600         |          |
| XXXXXX  | XXXXXX  | 24       | 580         |          |
| XXXXXX  | XXXXXX  | 24       | 700         |          |
| XXXXXX  | XXXXXX  | 24       | 9999999     |          |
| XXXXXX  | XXXXXX  | 24       | 980         |          |
| XXXXXX  | XXXXXX  | 24       | 1000        |          |
| XXXXXX  | XXXXXX  | 24       | 950         |          |
| XXXXXX  | XXXXXX  | 24       | 900         |          |
| XXXXXX  | XXXXXX  | 24       | 1000        |          |
| XXXXXX  | XXXXXX  | 24       | 900         |          |
| XXXXXX  | XXXXXX  | 24       | 1000        |          |
| XXXXXX  | XXXXXX  | 24       | 1100        |          |
| XXXXXX  | XXXXXX  | 24       | 450         |          |
| XXXXXX  | XXXXXX  | 24       | 300         |          |
| XXXXXX  | XXXXXX  | 24       | 400         |          |
| XXXXXX  | XXXXXX  | 24       | 250         |          |
| XXXXXX  | XXXXXX  | 24       | 300         |          |
| XXXXXX  | XXXXXX  | 24       | 300         |          |
| XXXXXX  | XXXXXX  | 24       | 300         |          |
| XXXXXX  | XXXXXX  | 24       | 300         |          |
| XXXXXX  | XXXXXX  | 24       | 300         |          |
| XXXXXX  | XXXXXX  | 24       | 350         |          |
| XXXXXX  | XXXXXX  | 24       | 250         |          |
| XXXXXX  | XXXXXX  | 24       | 9999999     |          |
| XXXXXX  | XXXXXX  | 6        | 200         |          |
| XXXXXX  | XXXXXX  | 12       | 200         |          |
| XXXXXX  | XXXXXX  | 6        | 250         |          |
| XXXXXX  | XXXXXX  | 6        | 300         |          |
| XXXXXX  | XXXXXX  | 18       | 250         |          |
| XXXXXX  | XXXXXX  | 12       | 250         |          |
| XXXXXX  | XXXXXX  | 24       | 200         |          |
| XXXXXX  | XXXXXX  | 24       | 250         |          |
| XXXXXX  | XXXXXX  | 24       | 250         |          |
| XXXXXX  | XXXXXX  | 24       | 450         |          |
| XXXXXX  | XXXXXX  | 24       | 400         |          |
| XXXXXX  | XXXXXX  | 24       | 200         |          |
| XXXXXX  | XXXXXX  | 24       | 9999999     |          |
| XXXXXX  | XXXXXX  | 24       | 9999999     |          |
| XXXXXX  | XXXXXX  | 18       | 300         |          |
| XXXXXX  | XXXXXX  | 6        | 350         |          |

|        |         |    |         |                                            |
|--------|---------|----|---------|--------------------------------------------|
| XXXXXX | XXXXXXX | 24 | 700     | Expired                                    |
| XXXXXX | XXXXXXX | 24 | 300     |                                            |
| XXXXXX | XXXXXXX | 24 | 350     |                                            |
| XXXXXX | XXXXXXX | 24 | 300     |                                            |
| XXXXXX | XXXXXXX | 24 | 500     |                                            |
| XXXXXX | XXXXXXX | 24 | 350     |                                            |
| XXXXXX | XXXXXXX | 12 | 150     | only 12 tablets from 24tab pack            |
| XXXXXX | XXXXXXX | 24 | 200     |                                            |
| XXXXXX | XXXXXXX | 24 | 250     |                                            |
| XXXXXX | XXXXXXX | 24 | 9999999 |                                            |
| XXXXXX | XXXXXXX | 24 | 600     |                                            |
| XXXXXX | XXXXXXX | 6  | 400     |                                            |
| XXXXXX | XXXXXXX | 12 | 9999999 |                                            |
| XXXXXX | XXXXXXX | 12 | 800     |                                            |
| XXXXXX | XXXXXXX | 12 | 650     |                                            |
| XXXXXX | XXXXXXX | 12 | 620     |                                            |
| XXXXXX | XXXXXXX | 12 | 9999999 |                                            |
| XXXXXX | XXXXXXX | 12 | 550     |                                            |
| XXXXXX | XXXXXXX | 12 | 650     |                                            |
| XXXXXX | XXXXXXX | 6  | 450     |                                            |
| XXXXXX | XXXXXXX | 6  | 9999999 |                                            |
| XXXXXX | XXXXXXX | 6  | 550     |                                            |
| XXXXXX | XXXXXXX | 6  | 700     |                                            |
| XXXXXX | XXXXXXX | 6  | 550     |                                            |
| XXXXXX | XXXXXXX | 6  | 9999999 |                                            |
| XXXXXX | XXXXXXX | 6  | 700     |                                            |
| XXXXXX | XXXXXXX | 6  | 9999999 |                                            |
| XXXXXX | XXXXXXX | 6  | 650     |                                            |
| XXXXXX | XXXXXXX | 6  | 550     | The original pack is in a bad condition    |
| XXXXXX | XXXXXXX | 6  | 650     |                                            |
| XXXXXX | XXXXXXX | 6  | 450     |                                            |
| XXXXXX | XXXXXXX | 6  | 9999999 |                                            |
| XXXXXX | XXXXXXX | 6  | 700     |                                            |
| XXXXXX | XXXXXXX | 6  | 500     |                                            |
| XXXXXX | XXXXXXX | 6  | 9999999 |                                            |
| XXXXXX | XXXXXXX | 6  | 700     |                                            |
| XXXXXX | XXXXXXX | 6  | 9999999 |                                            |
| XXXXXX | XXXXXXX | 6  | 650     |                                            |
| XXXXXX | XXXXXXX | 6  | 650     |                                            |
| XXXXXX | XXXXXXX | 6  | 550     |                                            |
| XXXXXX | XXXXXXX | 6  | 700     |                                            |
| XXXXXX | XXXXXXX | 6  | 9999999 | Have an identifying barcode on the blister |
| XXXXXX | XXXXXXX | 6  | 800     |                                            |
| XXXXXX | XXXXXXX | 6  | 750     |                                            |
| XXXXXX | XXXXXXX | 6  | 750     |                                            |
| XXXXXX | XXXXXXX | 6  | 700     |                                            |
| XXXXXX | XXXXXXX | 6  | 750     |                                            |
| XXXXXX | XXXXXXX | 6  | 750     |                                            |
| XXXXXX | XXXXXXX | 6  | 750     |                                            |
| XXXXXX | XXXXXXX | 6  | 750     |                                            |
| XXXXXX | XXXXXXX | 6  | 750     |                                            |

|        |         |    |                                                  |
|--------|---------|----|--------------------------------------------------|
| XXXXXX | XXXXXXX | 6  | 750 original pack is in a bad condition          |
| XXXXXX | XXXXXXX | 6  | 750                                              |
| XXXXXX | XXXXXXX | 6  | 750                                              |
| XXXXXX | XXXXXXX | 6  | 730                                              |
| XXXXXX | XXXXXXX | 6  | 850                                              |
| XXXXXX | XXXXXXX | 6  | 9999999                                          |
| XXXXXX | XXXXXXX | 6  | 9999999                                          |
| XXXXXX | XXXXXXX | 6  | 500 The original pack is in a bad condition      |
| XXXXXX | XXXXXXX | 6  | 600                                              |
| XXXXXX | XXXXXXX | 6  | 630                                              |
| XXXXXX | XXXXXXX | 6  | 650                                              |
| XXXXXX | XXXXXXX | 6  | 9999999                                          |
| XXXXXX | XXXXXXX | 6  | 600                                              |
| XXXXXX | XXXXXXX | 6  | 500                                              |
| XXXXXX | XXXXXXX | 6  | 650                                              |
| XXXXXX | XXXXXXX | 6  | 600                                              |
| XXXXXX | XXXXXXX | 6  | 700                                              |
| XXXXXX | XXXXXXX | 6  | 9999999                                          |
| XXXXXX | XXXXXXX | 6  | 9999999                                          |
| XXXXXX | XXXXXXX | 6  | 550                                              |
| XXXXXX | XXXXXXX | 6  | 600                                              |
| XXXXXX | XXXXXXX | 6  | 500                                              |
| XXXXXX | XXXXXXX | 6  | 9999999                                          |
| XXXXXX | XXXXXXX | 6  | 650                                              |
| XXXXXX | XXXXXXX | 6  | 600                                              |
| XXXXXX | XXXXXXX | 6  | 500                                              |
| XXXXXX | XXXXXXX | 6  | 450                                              |
| XXXXXX | XXXXXXX | 6  | 550                                              |
| XXXXXX | XXXXXXX | 6  | 550                                              |
| XXXXXX | XXXXXXX | 1  | 550                                              |
| XXXXXX | XXXXXXX | 1  | 600                                              |
| XXXXXX | XXXXXXX | 1  | 650                                              |
| XXXXXX | XXXXXXX | 1  | 650                                              |
| XXXXXX | XXXXXXX | 4  | 250                                              |
| XXXXXX | XXXXXXX | 12 | 300 monotherapy                                  |
| XXXXXX | XXXXXXX | 24 | 450                                              |
| XXXXXX | XXXXXXX | 24 | 450                                              |
| XXXXXX | XXXXXXX | 6  | 250                                              |
| XXXXXX | XXXXXXX | 12 | 320                                              |
| XXXXXX | XXXXXXX | 12 | 300                                              |
| XXXXXX | XXXXXXX | 12 | 270                                              |
| XXXXXX | XXXXXXX | 12 | 300 monotherapy                                  |
| XXXXXX | XXXXXXX | 12 | 300                                              |
| XXXXXX | XXXXXXX | 6  | 500                                              |
| XXXXXX | XXXXXXX | 6  | 300                                              |
| XXXXXX | XXXXXXX | 6  | 9999999 The blister is without its original pack |
| XXXXXX | XXXXXXX | 6  | 9999999                                          |
| XXXXXX | XXXXXXX | 12 | 9999999                                          |
| XXXXXX | XXXXXXX | 12 | 600                                              |

















































































|   |                          |    |     |
|---|--------------------------|----|-----|
| - | Dihydroarten tablets     | XX | XXX |
| - | Dihydroarten tablets     | XX | XXX |
| - | Dihydroarten tablets     | XX | XXX |
| - | Dihydroarten tablets     | XX | XXX |
| - | Dihydroarten tablets     | XX | XXX |
| - | Dihydroarten tablets     | XX | XXX |
| - | Dihydroarten tablets     | XX | XXX |
| - | Dihydroarten tablets     | XX | XXX |
| - | Dihydroarten tablets     | XX | XXX |
| - | Dihydroarten tablets     | XX | XXX |
| - | Dihydroarten tablets     | XX | XXX |
| - | Dihydroarten tablets     | XX | XXX |
| - | Dihydroarten tablets     | XX | XXX |
| - | Dihydroarten tablets     | XX | XXX |
| - | Dihydroarten tablets     | XX | XXX |
| - | Dihydroarten tablets     | XX | XXX |
| - | Dihydroarten tablets     | XX | XXX |
| - | Dihydroarten tablets     | XX | XXX |
| - | Dihydroarten tablets     | XX | XXX |
| - | Dihydroarten tablets     | XX | XXX |
| - | Dihydroarten tablets     | XX | XXX |
| - | Dihydroarten tablets     | XX | XXX |
| - | not sent to A suspension | XX | XXX |
| - | Artemether-I suspension  | XX | XXX |
| - | not sent to A suspension | XX | XXX |
| - | not sent to A suspension | XX | XXX |
| - | not sent to A suspension | XX | XXX |
| - | not sent to A suspension | XX | XXX |
| - | not sent to A suspension | XX | XXX |
| - | not sent to A suspension | XX | XXX |
| - | Artemether-I suspension  | XX | XXX |
| - | not sent to A suspension | XX | XXX |
| - | not sent to A suspension | XX | XXX |
| - | not sent to A suspension | XX | XXX |
| - | not sent to A suspension | XX | XXX |
| - | Artemether-I suspension  | XX | XXX |
| - | Artemether-I suspension  | XX | XXX |
| - | not sent to A suspension | XX | XXX |
| - | Artemether-I suspension  | XX | XXX |
| - | Artemether-I suspension  | XX | XXX |
| - | not sent to A suspension | XX | XXX |
| - | not sent to A suspension | XX | XXX |
| - | not sent to A suspension | XX | XXX |
| - | not sent to A suspension | XX | XXX |
| - | Artemether-I suspension  | XX | XXX |
| - | Artemether-I suspension  | XX | XXX |



|   |                          |    |     |
|---|--------------------------|----|-----|
| - | Artemether-I suspension  | XX | XXX |
| - | Artemether-I suspension  | XX | XXX |
| - | Artemether-I suspension  | XX | XXX |
| - | Artemether-I suspension  | XX | XXX |
| - | Artemether-I suspension  | XX | XXX |
| - | Artemether-I suspension  | XX | XXX |
| - | Artemether-I suspension  | XX | XXX |
| - | not sent to A suspension | XX | XXX |
| - | not sent to A suspension | XX | XXX |
| - | not sent to A suspension | XX | XXX |
| - | not sent to A suspension | XX | XXX |
| - | Artemether-I suspension  | XX | XXX |
| - | Artemether-I suspension  | XX | XXX |
| - | Artemether-I capsules    | XX | XXX |
| - | Artemether-I capsules    | XX | XXX |
| - | Artemether-I capsules    | XX | XXX |
| - | Artemether-I capsules    | XX | XXX |
| - | Artemether-I capsules    | XX | XXX |
| - | Artemether-I soft gel    | XX | XXX |
| - | Artemether-I soft gel    | XX | XXX |
| - | Artemether-I soft gel    | XX | XXX |
| - | Artemether-I granule     | XX | XXX |
| - | Artemether-I granule     | XX | XXX |
| - | Artemether-I granule     | XX | XXX |
| - | Artesunate suspension    | XX | XXX |
| - | not sent to A suspension | XX | XXX |
| - | Artesunate suspension    | XX | XXX |
| - | not sent to A suspension | XX | XXX |
| - | Artesunate suspension    | XX | XXX |
| - | not sent to A suspension | XX | XXX |
| - | Artesunate suspension    | XX | XXX |
| - | not sent to A suspension | XX | XXX |
| - | Artesunate suspension    | XX | XXX |
| - | not sent to A suspension | XX | XXX |
| - | Artesunate suspension    | XX | XXX |
| - | not sent to A suspension | XX | XXX |
| - | Artesunate-A suspension  | XX | XXX |
| - | not sent to A suspension | XX | XXX |
| - | not sent to A suspension | XX | XXX |
| - | Dihydroarten suspension  | XX | XXX |
| - | not sent to A suspension | XX | XXX |
| - | not sent to A suspension | XX | XXX |
| - | Dihydroarten suspension  | XX | XXX |
| - | not sent to A suspension | XX | XXX |
| - | not sent to A suspension | XX | XXX |













































---

| UniqueKey | Recstatus | dateofcapture | otherbname | altitude | coordinateN |
|-----------|-----------|---------------|------------|----------|-------------|
| 1093      | 1         | 26/06/2012    |            | 174      | 6.43651     |
| 1135      | 1         | 28/06/2012    |            | 173      | 6.458       |
| 1148      | 1         | 28/06/2012    |            | 174      | 6.41256     |
| 1166      | 1         | 29/06/2012    |            | 243      | 6.48775     |
| 1189      | 1         | 29/06/2012    |            | 137      | 6.47443     |
| 1204      | 1         | 29/06/2012    |            | 176      | 6.49644     |
| 1195      | 1         | 29/06/2012    |            | 137      | 6.47443     |
| 1128      | 1         | 28/06/2012    |            | 173      | 6.458       |
| 1192      | 1         | 29/06/2012    |            | 137      | 6.47443     |
| 1271      | 1         | 29/06/2012    |            | 101      | 6.41292     |
| 1113      | 1         | 26/06/2012    |            | 174      | 6.43651     |
| 1137      | 1         | 28/06/2012    |            | 173      | 6.458       |
| 1145      | 1         | 28/06/2012    |            | 125      | 6.46048     |
| 1155      | 1         | 29/06/2012    |            | 144      | 6.46361     |
| 1167      | 1         | 29/06/2012    |            | 243      | 6.48775     |
| 1182      | 1         | 29/06/2012    |            | 198      | 6.47732     |
| 1191      | 1         | 29/06/2012    |            | 137      | 6.47443     |
| 1209      | 1         | 29/06/2012    |            | 176      | 6.49644     |
| 1280      | 1         | 02/07/2012    |            | 156      | 6.42479     |
| 1125      | 1         | 28/06/2012    |            | 173      | 6.458       |
| 1154      | 1         | 29/06/2012    |            | 144      | 6.46361     |
| 1181      | 1         | 29/06/2012    |            | 198      | 6.47732     |
| 1194      | 1         | 29/06/2012    |            | 137      | 6.47443     |
| 1203      | 1         | 29/06/2012    |            | 155      | 6.47633     |
| 1208      | 1         | 29/06/2012    |            | 176      | 6.49644     |
| 1221      | 1         | 29/06/2012    |            | 165      | 6.43893     |
| 1230      | 1         | 29/06/2012    |            | 116      | 6.37491     |
| 1234      | 1         | 29/06/2012    |            | 174      | 6.4105      |
| 1250      | 1         | 29/06/2012    |            | 164      | 6.42491     |
| 1296      | 1         | 02/07/2012    |            | 0        | 0           |
| 1130      | 1         | 28/06/2012    |            | 173      | 6.458       |
| 1222      | 1         | 29/06/2012    |            | 165      | 6.43893     |
| 1238      | 1         | 29/06/2012    |            | 122      | 6.42468     |
| 1245      | 1         | 29/06/2012    |            | 174      | 6.41548     |
| 1264      | 1         | 29/06/2012    |            | 101      | 6.41292     |
| 1270      | 1         | 29/06/2012    |            | 101      | 6.41292     |
| 1151      | 1         | 28/06/2012    |            | 174      | 6.41256     |
| 1165      | 1         | 29/06/2012    |            | 243      | 6.48775     |
| 1231      | 1         | 29/06/2012    |            | 116      | 6.37491     |
| 1241      | 1         | 29/06/2012    |            | 122      | 6.42468     |
| 1246      | 1         | 29/06/2012    |            | 174      | 6.41548     |
| 1277      | 1         | 02/07/2012    |            | 156      | 6.42479     |
| 1289      | 1         | 02/07/2012    |            | 138      | 6.44296     |
| 1293      | 1         | 02/07/2012    |            | 0        | 0           |
| 1220      | 1         | 29/06/2012    |            | 165      | 6.43893     |
| 1217      | 1         | 29/06/2012    |            | 135      | 6.44303     |



|      |   |            |     |         |
|------|---|------------|-----|---------|
| 1211 | 1 | 29/06/2012 | 176 | 6.49644 |
| 1141 | 1 | 28/06/2012 | 173 | 6.458   |
| 1161 | 1 | 29/06/2012 | 144 | 6.46361 |
| 1176 | 1 | 29/06/2012 | 198 | 6.47732 |
| 1210 | 1 | 29/06/2012 | 176 | 6.49644 |
| 1216 | 1 | 29/06/2012 | 135 | 6.44303 |
| 1224 | 1 | 29/06/2012 | 145 | 6.39289 |
| 1239 | 1 | 29/06/2012 | 122 | 6.42468 |
| 1261 | 1 | 29/06/2012 | 101 | 6.41292 |
| 1101 | 1 | 26/06/2012 | 174 | 6.43651 |
| 1199 | 1 | 29/06/2012 | 137 | 6.47443 |
| 1122 | 1 | 28/06/2012 | 173 | 6.458   |
| 1103 | 1 | 26/06/2012 | 174 | 6.43651 |
| 1119 | 1 | 28/06/2012 | 173 | 6.458   |
| 1257 | 1 | 29/06/2012 | 164 | 6.42491 |
| 1283 | 1 | 02/07/2012 | 156 | 6.42479 |
| 1104 | 1 | 26/06/2012 | 174 | 6.43651 |
| 1172 | 1 | 29/06/2012 | 243 | 6.48775 |
| 1212 | 1 | 29/06/2012 | 135 | 6.44303 |
| 1285 | 1 | 02/07/2012 | 156 | 6.42479 |
| 1116 | 1 | 26/06/2012 | 174 | 6.43651 |
| 1170 | 1 | 29/06/2012 | 243 | 6.48775 |
| 1183 | 1 | 29/06/2012 | 198 | 6.47732 |
| 1254 | 1 | 29/06/2012 | 164 | 6.42491 |
| 1115 | 1 | 26/06/2012 | 174 | 6.43651 |
| 1180 | 1 | 29/06/2012 | 198 | 6.47732 |
| 1109 | 1 | 26/06/2012 | 174 | 6.43651 |
| 1136 | 1 | 28/06/2012 | 173 | 6.458   |
| 1163 | 1 | 29/06/2012 | 144 | 6.46361 |
| 1262 | 1 | 29/06/2012 | 101 | 6.41292 |
| 1276 | 1 | 02/07/2012 | 156 | 6.42479 |
| 1110 | 1 | 26/06/2012 | 174 | 6.43651 |
| 1124 | 1 | 28/06/2012 | 173 | 6.458   |
| 1247 | 1 | 29/06/2012 | 174 | 6.41548 |
| 1100 | 1 | 26/06/2012 | 174 | 6.43651 |
| 1126 | 1 | 28/06/2012 | 173 | 6.458   |
| 1112 | 1 | 26/06/2012 | 174 | 6.43651 |
| 1138 | 1 | 28/06/2012 | 173 | 6.458   |
| 1144 | 1 | 28/06/2012 | 125 | 6.46048 |
| 1156 | 1 | 29/06/2012 | 144 | 6.46361 |
| 1226 | 1 | 29/06/2012 | 145 | 6.39289 |
| 1092 | 1 | 26/06/2012 | 174 | 6.43651 |
| 1129 | 1 | 28/06/2012 | 173 | 6.458   |
| 1146 | 1 | 28/06/2012 | 125 | 6.46048 |
| 1150 | 1 | 28/06/2012 | 174 | 6.41256 |
| 1169 | 1 | 29/06/2012 | 243 | 6.48775 |
| 1184 | 1 | 29/06/2012 | 198 | 6.47732 |
| 1196 | 1 | 29/06/2012 | 137 | 6.47443 |
| 1201 | 1 | 29/06/2012 | 155 | 6.47633 |
| 1206 | 1 | 29/06/2012 | 176 | 6.49644 |

|      |   |            |     |         |
|------|---|------------|-----|---------|
| 1223 | 1 | 29/06/2012 | 165 | 6.43893 |
| 1228 | 1 | 29/06/2012 | 145 | 6.39289 |
| 1248 | 1 | 29/06/2012 | 164 | 6.42491 |
| 1267 | 1 | 29/06/2012 | 101 | 6.41292 |
| 1281 | 1 | 02/07/2012 | 156 | 6.42479 |
| 1291 | 1 | 02/07/2012 | 0   | 0       |
| 1095 | 1 | 26/06/2012 | 174 | 6.43651 |
| 1120 | 1 | 28/06/2012 | 173 | 6.458   |
| 1168 | 1 | 29/06/2012 | 243 | 6.48775 |
| 1265 | 1 | 29/06/2012 | 101 | 6.41292 |
| 1133 | 1 | 28/06/2012 | 173 | 6.458   |
| 1091 | 1 | 26/06/2012 | 174 | 6.43651 |
| 1131 | 1 | 28/06/2012 | 173 | 6.458   |
| 1200 | 1 | 29/06/2012 | 137 | 6.47443 |
| 1249 | 1 | 29/06/2012 | 164 | 6.42491 |
| 1269 | 1 | 29/06/2012 | 101 | 6.41292 |
| 1274 | 1 | 02/07/2012 | 156 | 6.42479 |
| 1295 | 1 | 02/07/2012 | 0   | 0       |
| 1090 | 1 | 26/06/2012 | 174 | 6.43651 |
| 1118 | 1 | 28/06/2012 | 173 | 6.458   |
| 1158 | 1 | 29/06/2012 | 144 | 6.46361 |
| 1190 | 1 | 29/06/2012 | 137 | 6.47443 |
| 1098 | 1 | 26/06/2012 | 174 | 6.43651 |
| 1117 | 1 | 28/06/2012 | 173 | 6.458   |
| 1153 | 1 | 29/06/2012 | 144 | 6.46361 |
| 1175 | 1 | 29/06/2012 | 198 | 6.47732 |
| 1197 | 1 | 29/06/2012 | 137 | 6.47443 |
| 1251 | 1 | 29/06/2012 | 164 | 6.42491 |
| 1258 | 1 | 29/06/2012 | 101 | 6.41292 |
| 1173 | 1 | 29/06/2012 | 243 | 6.48775 |
| 1236 | 1 | 29/06/2012 | 174 | 6.4105  |
| 1244 | 1 | 29/06/2012 | 122 | 6.42468 |
| 1273 | 1 | 02/07/2012 | 156 | 6.42479 |
| 1275 | 1 | 02/07/2012 | 156 | 6.42479 |
| 1152 | 1 | 28/06/2012 | 174 | 6.41256 |
| 1232 | 1 | 29/06/2012 | 116 | 6.37491 |
| 1260 | 1 | 29/06/2012 | 101 | 6.41292 |
| 1243 | 1 | 29/06/2012 | 122 | 6.42468 |
| 1185 | 1 | 29/06/2012 | 198 | 6.47732 |
| 1297 | 1 | 02/07/2012 | 198 | 6.47732 |
| 1299 | 1 | 02/07/2012 | 243 | 6.48775 |
| 1219 | 1 | 29/06/2012 | 165 | 6.43893 |
| 1227 | 1 | 29/06/2012 | 145 | 6.39289 |
| 1121 | 1 | 28/06/2012 | 173 | 6.458   |
| 1259 | 1 | 29/06/2012 | 101 | 6.41292 |
| 1290 | 1 | 02/07/2012 | 138 | 6.44296 |
| 1292 | 1 | 02/07/2012 | 0   | 0       |
| 1097 | 1 | 26/06/2012 | 174 | 6.43651 |
| 1134 | 1 | 28/06/2012 | 173 | 6.458   |

|      |   |            |     |         |
|------|---|------------|-----|---------|
| 1159 | 1 | 29/06/2012 | 144 | 6.46361 |
| 1198 | 1 | 29/06/2012 | 137 | 6.47443 |
| 1207 | 1 | 29/06/2012 | 176 | 6.49644 |
| 1214 | 1 | 29/06/2012 | 135 | 6.44303 |
| 1107 | 1 | 26/06/2012 | 174 | 6.43651 |
| 1288 | 1 | 02/07/2012 | 138 | 6.44296 |
| 1213 | 1 | 29/06/2012 | 135 | 6.44303 |
| 1140 | 1 | 28/06/2012 | 173 | 6.458   |
| 1253 | 1 | 29/06/2012 | 164 | 6.42491 |
| 1298 | 1 | 02/07/2012 | 198 | 6.47732 |
| 1301 | 1 | 02/07/2012 | 243 | 6.48775 |
| 1106 | 1 | 26/06/2012 | 174 | 6.43651 |
| 1215 | 1 | 29/06/2012 | 135 | 6.44303 |
| 1268 | 1 | 29/06/2012 | 101 | 6.41292 |
| 1096 | 1 | 26/06/2012 | 174 | 6.43651 |
| 1143 | 1 | 28/06/2012 | 125 | 6.46048 |
| 1160 | 1 | 29/06/2012 | 144 | 6.46361 |
| 1178 | 1 | 29/06/2012 | 198 | 6.47732 |
| 1266 | 1 | 29/06/2012 | 101 | 6.41292 |
| 1284 | 1 | 02/07/2012 | 156 | 6.42479 |
| 1286 | 1 | 02/07/2012 | 157 | 6.42643 |
| 1111 | 1 | 26/06/2012 | 174 | 6.43651 |
| 1105 | 1 | 26/06/2012 | 174 | 6.43651 |
| 1099 | 1 | 26/06/2012 | 174 | 6.43651 |
| 1177 | 1 | 29/06/2012 | 198 | 6.47732 |
| 1108 | 1 | 26/06/2012 | 174 | 6.43651 |
| 1123 | 1 | 28/06/2012 | 173 | 6.458   |
| 1179 | 1 | 29/06/2012 | 198 | 6.47732 |
| 1263 | 1 | 29/06/2012 | 101 | 6.41292 |
| 1287 | 1 | 02/07/2012 | 157 | 6.42643 |
| 1114 | 1 | 26/06/2012 | 174 | 6.43651 |
| 1132 | 1 | 28/06/2012 | 173 | 6.458   |
| 1149 | 1 | 28/06/2012 | 174 | 6.41256 |
| 1157 | 1 | 29/06/2012 | 144 | 6.46361 |
| 1171 | 1 | 29/06/2012 | 243 | 6.48775 |
| 1187 | 1 | 29/06/2012 | 198 | 6.47732 |
| 1193 | 1 | 29/06/2012 | 137 | 6.47443 |
| 1202 | 1 | 29/06/2012 | 155 | 6.47633 |
| 1218 | 1 | 29/06/2012 | 165 | 6.43893 |
| 1225 | 1 | 29/06/2012 | 145 | 6.39289 |
| 1229 | 1 | 29/06/2012 | 116 | 6.37491 |
| 1235 | 1 | 29/06/2012 | 174 | 6.4105  |
| 1242 | 1 | 29/06/2012 | 122 | 6.42468 |
| 1282 | 1 | 02/07/2012 | 156 | 6.42479 |
| 1294 | 1 | 02/07/2012 | 0   | 0       |
| 1102 | 1 | 26/06/2012 | 174 | 6.43651 |
| 1127 | 1 | 28/06/2012 | 173 | 6.458   |
| 1162 | 1 | 29/06/2012 | 144 | 6.46361 |

































































































































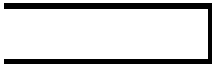

**coordinateE**

7.47968  
7.52716  
7.53534  
7.57523  
7.58727  
7.514  
7.58727  
7.52716  
7.58727  
7.49865  
7.47968  
7.52716  
7.49823  
7.49565  
7.57523  
7.4931  
7.58727  
7.514  
7.52928  
7.52716  
7.49565  
7.4931  
7.58727  
7.58271  
7.514  
7.49474  
7.52198  
7.48758  
7.47795  
0  
7.52716  
7.49474  
7.49319  
7.50597  
7.49865  
7.49865  
7.53534  
7.57523  
7.52198  
7.49319  
7.50597  
7.52928  
7.50048  
0  
7.49474  
7.49808

7.514  
7.52716  
7.49565  
7.4931  
7.514  
7.49808  
7.4975  
7.49319  
7.49865  
7.47968  
7.58727  
7.52716  
7.47968  
7.52716  
7.47795  
7.52928  
7.47968  
7.57523  
7.49808  
7.52928  
7.47968  
7.57523  
7.4931  
7.47795  
7.47968  
7.4931  
7.47968  
7.52716  
7.49565  
7.49865  
7.52928  
7.47968  
7.52716  
7.50597  
7.47968  
7.52716  
7.47968  
7.52716  
7.49823  
7.49565  
7.4975  
7.47968  
7.52716  
7.49823  
7.53534  
7.57523  
7.4931  
7.58727  
7.58271  
7.514

7.49474  
7.4975  
7.47795  
7.49865  
7.52928  
0  
7.47968  
7.52716  
7.57523  
7.49865  
7.52716  
7.47968  
7.52716  
7.58727  
7.47795  
7.49865  
7.52928  
0  
7.47968  
7.52716  
7.49565  
7.58727  
7.47968  
7.52716  
7.49565  
7.4931  
7.58727  
7.47795  
7.49865  
7.57523  
7.48758  
7.49319  
7.52928  
7.52928  
7.53534  
7.52198  
7.49865  
7.49319  
7.4931  
7.4931  
7.57523  
7.49474  
7.4975  
7.52716  
7.49865  
7.50048  
0  
7.47968  
7.52716

7.49565  
7.58727  
7.514  
7.49808  
7.47968  
7.50048  
7.49808  
7.52716  
7.47795  
7.4931  
7.57523  
7.47968  
7.49808  
7.49865  
7.47968  
7.49823  
7.49565  
7.4931  
7.49865  
7.52928  
7.48646  
7.47968  
7.47968  
7.47968  
7.4931  
7.47968  
7.52716  
7.4931  
7.49865  
7.48646  
7.47968  
7.52716  
7.53534  
7.49565  
7.57523  
7.4931  
7.58727  
7.58271  
7.49474  
7.4975  
7.52198  
7.48758  
7.49319  
7.52928  
0  
7.47968  
7.52716  
7.49565



7.57523  
7.4931  
7.514  
7.49319  
7.47795  
7.47968  
7.57523

| packsize | retailprice | UniqueKey | dateofcapt | AFDA       | Cregno |
|----------|-------------|-----------|------------|------------|--------|
| 24       | 550         | 1202      | 21-Jan-13  | XXXXXXXXXX |        |
| 24       | 500         | 399       | 09-Jan-13  | XXXXXXXXXX |        |
| 24       | 500         | 462       | 14-Jan-13  | XXXXXXXXXX |        |
| 6        | 350         | 833       | 17-Jan-13  | XXXXXXXXXX |        |
| 6        | 250         | 1015      | 17-Jan-13  | XXXXXXXXXX |        |
| 6        | 300         | 357       | 07-Jan-13  | XXXXXXXXXX |        |
| 6        | 150         | 505       | 10-Jan-13  | XXXXXXXXXX |        |
| 6        | 150         | 719       | 16-Jan-13  | XXXXXXXXXX |        |
| 6        | 200         | 983       | 17-Jan-13  | XXXXXXXXXX |        |
| 6        | 100         | 517       | 16-Jan-13  | XXXXXXXXXX |        |
| 6        | 200         | 1229      | 21-Jan-13  | XXXXXXXXXX |        |
| 6        |             | 701       | 16-Jan-13  | XXXXXXXXXX |        |
| 6        | 100         | 1144      | 21-Jan-13  | XXXXXXXXXX |        |
| 6        | 200         | 521       | 16-Jan-13  | XXXXXXXXXX |        |
| 6        | 200         | 488       | 09-Jan-13  | XXXXXXXXXX |        |
| 6        | 350         | 715       | 16-Jan-13  | XXXXXXXXXX |        |
| 6        | 150         | 1237      | 21-Jan-13  | XXXXXXXXXX |        |
| 6        |             | 678       | 16-Jan-13  | XXXXXXXXXX |        |
| 6        | 100         | 376       | 07-Jan-13  | XXXXXXXXXX |        |
| 6        | 150         | 1069      | 21-Jan-13  | XXXXXXXXXX |        |
| 6        | 150         | 1073      | 21-Jan-13  | XXXXXXXXXX |        |
| 6        | 150         | 616       | 15-Jan-13  | XXXXXXXXXX |        |
| 6        | 300         | 1254      | 22-Jan-13  | XXXXXXXXXX |        |
| 6        | 150         | 510       | 09-Jan-13  | XXXXXXXXXX |        |
| 6        |             | 706       | 16-Jan-13  | XXXXXXXXXX |        |
| 6        |             | 815       | 22-Jan-13  | XXXXXXXXXX |        |
| 6        | 300         | 598       | 16-Jan-13  | XXXXXXXXXX |        |
| 6        |             | 750       | 16-Jan-13  | XXXXXXXXXX |        |
| 6        | 300         | 775       | 22-Jan-13  | XXXXXXXXXX |        |
| 6        | 100         | 1107      | 21-Jan-13  | XXXXXXXXXX |        |
| 6        | 150         | 333       | 07-Jan-13  | XXXXXXXXXX |        |
| 6        | 200         | 358       | 07-Jan-13  | XXXXXXXXXX |        |
| 6        | 200         | 752       | 21-Jan-13  | XXXXXXXXXX |        |
| 6        | 300         | 448       | 09-Jan-13  | XXXXXXXXXX |        |
| 6        | 150         | 861       | 17-Jan-13  | XXXXXXXXXX |        |
| 6        | 300         | 607       | 15-Jan-13  | XXXXXXXXXX |        |
| 6        |             | 743       | 16-Jan-13  | XXXXXXXXXX |        |
| 6        | 150         | 350       | 08-Jan-13  | XXXXXXXXXX |        |
| 6        | 200         | 351       | 08-Jan-13  | XXXXXXXXXX |        |

|    |     |      |           |            |
|----|-----|------|-----------|------------|
| 6  | 150 | 373  | 08-Jan-13 | XXXXXXXXXX |
| 6  | 250 | 452  | 09-Jan-13 | XXXXXXXXXX |
| 6  | 150 | 590  | 17-Jan-13 | XXXXXXXXXX |
| 6  | 150 | 513  | 10-Jan-13 | XXXXXXXXXX |
| 6  |     | 1185 | 21-Jan-13 | XXXXXXXXXX |
| 6  | 100 | 704  | 21-Jan-13 | XXXXXXXXXX |
| 6  |     | 728  | 16-Jan-13 | XXXXXXXXXX |
| 12 | 300 | 1016 | 17-Jan-13 | XXXXXXXXXX |
| 12 | 200 | 1238 | 22-Jan-13 | XXXXXXXXXX |
| 12 | 250 | 718  | 16-Jan-13 | XXXXXXXXXX |
| 12 |     | 721  | 16-Jan-13 | XXXXXXXXXX |
| 12 | 200 | 692  | 21-Jan-13 | XXXXXXXXXX |
| 12 | 200 | 554  | 16-Jan-13 | XXXXXXXXXX |
| 12 |     | 814  | 22-Jan-13 | XXXXXXXXXX |
| 12 |     | 751  | 16-Jan-13 | XXXXXXXXXX |
| 12 | 250 | 1169 | 21-Jan-13 | XXXXXXXXXX |
| 12 | 200 | 335  | 07-Jan-13 | XXXXXXXXXX |
| 12 | 300 | 753  | 21-Jan-13 | XXXXXXXXXX |
| 12 | 400 | 644  | 17-Jan-13 | XXXXXXXXXX |
| 12 | 250 | 862  | 17-Jan-13 | XXXXXXXXXX |
| 12 |     | 746  | 16-Jan-13 | XXXXXXXXXX |
| 12 |     | 1184 | 21-Jan-13 | XXXXXXXXXX |
| 12 |     | 730  | 16-Jan-13 | XXXXXXXXXX |
| 12 |     |      |           | XXXXXXXXXX |
| 18 | 350 | 837  | 17-Jan-13 | XXXXXXXXXX |
| 18 | 350 | 1195 | 21-Jan-13 | XXXXXXXXXX |
| 18 | 250 | 1211 | 21-Jan-13 | XXXXXXXXXX |
| 18 |     | 1137 | 21-Jan-13 | XXXXXXXXXX |
| 18 |     | 1138 | 21-Jan-13 | XXXXXXXXXX |
| 18 | 300 | 748  | 21-Jan-13 | XXXXXXXXXX |
| 18 | 400 | 506  | 10-Jan-13 | XXXXXXXXXX |
| 18 | 300 | 1043 | 21-Jan-13 | XXXXXXXXXX |
| 18 | 250 | 516  | 16-Jan-13 | XXXXXXXXXX |
| 18 | 350 | 1181 | 21-Jan-13 | XXXXXXXXXX |
| 18 |     | 703  | 16-Jan-13 | XXXXXXXXXX |
| 18 | 300 | 635  | 15-Jan-13 | XXXXXXXXXX |
| 18 | 250 | 1145 | 21-Jan-13 | XXXXXXXXXX |
| 18 | 250 | 770  | 16-Jan-13 | XXXXXXXXXX |
| 18 |     | 683  | 16-Jan-13 | XXXXXXXXXX |
| 18 | 450 | 1080 | 21-Jan-13 | XXXXXXXXXX |
| 18 | 300 | 584  | 15-Jan-13 | XXXXXXXXXX |
| 18 | 350 | 591  | 15-Jan-13 | XXXXXXXXXX |
| 18 | 350 | 1255 | 22-Jan-13 | XXXXXXXXXX |
| 18 | 250 | 511  | 09-Jan-13 | XXXXXXXXXX |
| 18 | 300 | 603  | 17-Jan-13 | XXXXXXXXXX |
| 18 | 250 | 661  | 18-Jan-13 | XXXXXXXXXX |
| 18 |     | 708  | 16-Jan-13 | XXXXXXXXXX |
| 18 |     | 816  | 22-Jan-13 | XXXXXXXXXX |
| 18 |     | 752  | 16-Jan-13 | XXXXXXXXXX |
| 18 | 400 | 776  | 22-Jan-13 | XXXXXXXXXX |

|    |     |      |           |            |
|----|-----|------|-----------|------------|
| 18 |     | 673  | 16-Jan-13 | XXXXXXXXXX |
| 18 | 250 | 694  | 21-Jan-13 | XXXXXXXXXX |
| 18 | 200 | 1104 | 21-Jan-13 | XXXXXXXXXX |
| 18 | 400 | 1017 | 17-Jan-13 | XXXXXXXXXX |
| 18 |     | 336  | 07-Jan-13 | XXXXXXXXXX |
| 18 | 300 | 1045 | 21-Jan-13 | XXXXXXXXXX |
| 18 | 400 | 754  | 21-Jan-13 | XXXXXXXXXX |
| 18 |     | 744  | 16-Jan-13 | XXXXXXXXXX |
| 18 | 400 | 677  | 17-Jan-13 | XXXXXXXXXX |
| 18 | 300 | 1172 | 21-Jan-13 | XXXXXXXXXX |
| 18 | 300 | 717  | 21-Jan-13 | XXXXXXXXXX |
| 18 |     | 1182 | 21-Jan-13 | XXXXXXXXXX |
| 18 | 100 | 700  | 21-Jan-13 | XXXXXXXXXX |
| 18 | 300 | 363  | 07-Jan-13 | XXXXXXXXXX |
| 18 |     | 727  | 16-Jan-13 | XXXXXXXXXX |
| 24 | 300 | 330  | 07-Jan-13 | XXXXXXXXXX |
| 24 | 400 | 398  | 08-Jan-13 | XXXXXXXXXX |
| 24 | 350 | 549  | 16-Jan-13 | XXXXXXXXXX |
| 24 | 450 | 1194 | 21-Jan-13 | XXXXXXXXXX |
| 24 | 500 | 339  | 07-Jan-13 | XXXXXXXXXX |
| 24 | 350 | 411  | 08-Jan-13 | XXXXXXXXXX |
| 24 | 250 | 1249 | 22-Jan-13 | XXXXXXXXXX |
| 24 | 400 |      | 08-Jan-13 | XXXXXXXXXX |
| 24 | 800 | 1205 | 21-Jan-13 | XXXXXXXXXX |
| 24 | 350 | 353  | 07-Jan-13 | XXXXXXXXXX |
| 24 | 350 | 386  | 07-Jan-13 | XXXXXXXXXX |
| 24 | 350 | 800  | 16-Jan-13 | XXXXXXXXXX |
| 24 | 550 | 653  | 18-Jan-13 | XXXXXXXXXX |
| 24 | 300 | 469  | 15-Jan-13 | XXXXXXXXXX |
| 24 | 400 | 618  | 15-Jan-13 | XXXXXXXXXX |
| 24 | 350 | 565  | 14-Jan-13 | XXXXXXXXXX |
| 24 | 300 | 515  | 15-Jan-13 | XXXXXXXXXX |
| 24 | 400 | 635  | 17-Jan-13 | XXXXXXXXXX |
| 24 | 600 | 886  | 17-Jan-13 | XXXXXXXXXX |
| 24 | 250 | 768  | 16-Jan-13 | XXXXXXXXXX |
| 24 | 500 | 947  | 17-Jan-13 | XXXXXXXXXX |
| 24 | 700 | 627  | 17-Jan-13 | XXXXXXXXXX |
| 24 |     | 682  | 16-Jan-13 | XXXXXXXXXX |
| 24 | 300 | 375  | 07-Jan-13 | XXXXXXXXXX |
| 24 | 450 | 1076 | 21-Jan-13 | XXXXXXXXXX |
| 24 | 250 | 784  | 16-Jan-13 | XXXXXXXXXX |
| 24 | 300 | 852  | 17-Jan-13 | XXXXXXXXXX |
| 24 | 400 | 486  | 10-Jan-13 | XXXXXXXXXX |
| 24 | 450 | 659  | 18-Jan-13 | XXXXXXXXXX |
| 24 |     | 707  | 16-Jan-13 | XXXXXXXXXX |
| 24 |     | 817  | 22-Jan-13 | XXXXXXXXXX |
| 24 | 400 | 578  | 17-Jan-13 | XXXXXXXXXX |
| 24 | 500 | 616  | 16-Jan-13 | XXXXXXXXXX |
| 24 |     | 753  | 16-Jan-13 | XXXXXXXXXX |
| 24 | 400 | 355  | 07-Jan-13 | XXXXXXXXXX |

|    |      |      |           |            |
|----|------|------|-----------|------------|
| 24 | 450  | 424  | 08-Jan-13 | XXXXXXXXXX |
| 24 | 300  | 1034 | 21-Jan-13 | XXXXXXXXXX |
| 24 | 250  | 1105 | 21-Jan-13 | XXXXXXXXXX |
| 24 | 450  | 755  | 21-Jan-13 | XXXXXXXXXX |
| 24 | 300  | 697  | 21-Jan-13 | XXXXXXXXXX |
| 24 | 350  | 873  | 17-Jan-13 | XXXXXXXXXX |
| 24 | 600  | 621  | 15-Jan-13 | XXXXXXXXXX |
| 24 | 500  | 863  | 17-Jan-13 | XXXXXXXXXX |
| 24 | 450  | 605  | 15-Jan-13 | XXXXXXXXXX |
| 24 |      | 745  | 16-Jan-13 | XXXXXXXXXX |
| 24 | 400  | 440  | 14-Jan-13 | XXXXXXXXXX |
| 24 | 350  | 652  | 17-Jan-13 | XXXXXXXXXX |
| 24 | 300  | 735  | 16-Jan-13 | XXXXXXXXXX |
| 24 |      | 1183 | 21-Jan-13 | XXXXXXXXXX |
| 24 | 350  | 558  | 14-Jan-13 | XXXXXXXXXX |
| 24 | 350  | 426  | 14-Jan-13 | XXXXXXXXXX |
| 24 | 300  | 672  | 21-Jan-13 | XXXXXXXXXX |
| 24 |      | 729  | 16-Jan-13 | XXXXXXXXXX |
| 24 | 600  | 677  | 21-Jan-13 | XXXXXXXXXX |
| 24 | 600  | 928  | 17-Jan-13 | XXXXXXXXXX |
| 24 | 550  | 919  | 17-Jan-13 | XXXXXXXXXX |
| 24 | 950  | 614  | 15-Jan-13 | XXXXXXXXXX |
| 24 | 500  | 644  | 18-Jan-13 | XXXXXXXXXX |
| 24 | 550  | 897  | 17-Jan-13 | XXXXXXXXXX |
| 24 | 550  | 472  | 10-Jan-13 | XXXXXXXXXX |
| 24 | 750  | 475  | 15-Jan-13 | XXXXXXXXXX |
| 24 | 550  | 858  | 17-Jan-13 | XXXXXXXXXX |
| 24 | 700  | 658  | 18-Jan-13 | XXXXXXXXXX |
| 24 | 200  | 353  | 07-Jan-13 | XXXXXXXXXX |
| 24 | 1000 | 356  | 08-Jan-13 | XXXXXXXXXX |
| 24 | 650  | 1192 | 21-Jan-13 | XXXXXXXXXX |
| 24 | 500  | 1227 | 21-Jan-13 | XXXXXXXXXX |
| 24 |      |      |           | XXXXXXXXXX |
| 24 | 650  | 829  | 17-Jan-13 | XXXXXXXXXX |
| 24 | 750  | 391  | 07-Jan-13 | XXXXXXXXXX |
| 24 | 600  | 588  | 15-Jan-13 | XXXXXXXXXX |
| 24 | 600  | 432  | 08-Jan-13 | XXXXXXXXXX |
| 24 | 650  | 810  | 22-Jan-13 | XXXXXXXXXX |
| 24 | 650  | 441  | 14-Jan-13 | XXXXXXXXXX |
| 24 | 600  | 857  | 17-Jan-13 | XXXXXXXXXX |
| 24 | 600  | 483  | 10-Jan-13 | XXXXXXXXXX |
| 24 | 700  | 875  | 17-Jan-13 | XXXXXXXXXX |
| 24 | 700  | 880  | 17-Jan-13 | XXXXXXXXXX |
| 24 | 650  | 429  | 08-Jan-13 | XXXXXXXXXX |
| 24 | 400  | 627  | 15-Jan-13 | XXXXXXXXXX |
| 12 | 300  | 386  | 08-Jan-13 | XXXXXXXXXX |
| 24 | 400  | 385  | 07-Jan-13 | XXXXXXXXXX |
| 24 | 300  | 416  | 10-Jan-13 | XXXXXXXXXX |
| 24 | 300  | 907  | 17-Jan-13 | XXXXXXXXXX |
| 24 | 350  | 723  | 16-Jan-13 | XXXXXXXXXX |

|    |      |      |           |            |
|----|------|------|-----------|------------|
| 24 | 350  | 992  | 17-Jan-13 | XXXXXXXXXX |
| 24 | 350  | 401  | 08-Jan-13 | XXXXXXXXXX |
| 24 | 650  | 334  | 07-Jan-13 | XXXXXXXXXX |
| 24 | 350  | 525  | 11-Jan-13 | XXXXXXXXXX |
| 12 | 700  | 449  | 09-Jan-13 | XXXXXXXXXX |
| 12 | 300  | 507  | 15-Jan-13 | XXXXXXXXXX |
| 12 | 250  | 519  | 09-Jan-13 | XXXXXXXXXX |
| 24 | 800  | 708  | 21-Jan-13 | XXXXXXXXXX |
| 24 | 600  | 975  | 17-Jan-13 | XXXXXXXXXX |
| 24 | 600  | 412  | 10-Jan-13 | XXXXXXXXXX |
| 24 | 400  | 744  | 21-Jan-13 | XXXXXXXXXX |
| 24 | 650  | 811  | 22-Jan-13 | XXXXXXXXXX |
| 24 | 600  | 609  | 15-Jan-13 | XXXXXXXXXX |
| 24 | 650  | 859  | 17-Jan-13 | XXXXXXXXXX |
| 24 | 600  | 473  | 10-Jan-13 | XXXXXXXXXX |
| 24 | 450  | 476  | 09-Jan-13 | XXXXXXXXXX |
| 24 | 600  | 714  | 21-Jan-13 | XXXXXXXXXX |
| 24 | 500  | 619  | 17-Jan-13 | XXXXXXXXXX |
| 24 | 500  | 441  | 08-Jan-13 | XXXXXXXXXX |
| 24 | 600  | 495  | 09-Jan-13 | XXXXXXXXXX |
| 24 | 550  | 413  | 10-Jan-13 | XXXXXXXXXX |
| 24 | 700  | 484  | 09-Jan-13 | XXXXXXXXXX |
| 24 | 600  | 581  | 16-Jan-13 | XXXXXXXXXX |
| 24 | 650  | 612  | 17-Jan-13 | XXXXXXXXXX |
| 24 | 900  | 678  | 21-Jan-13 | XXXXXXXXXX |
| 24 | 1000 | 545  | 16-Jan-13 | XXXXXXXXXX |
| 24 | 480  | 372  | 07-Jan-13 | XXXXXXXXXX |
| 24 | 900  | 1273 | 22-Jan-13 | XXXXXXXXXX |
| 24 | 900  | 492  | 15-Jan-13 | XXXXXXXXXX |
| 24 | 950  | 980  | 17-Jan-13 | XXXXXXXXXX |
| 24 | 1100 | 933  | 17-Jan-13 | XXXXXXXXXX |
| 24 | 950  | 424  | 08-Jan-13 | XXXXXXXXXX |
| 24 | 900  | 556  | 16-Jan-13 | XXXXXXXXXX |
| 24 | 1000 | 1085 | 21-Jan-13 | XXXXXXXXXX |
| 24 | 1000 | 452  | 14-Jan-13 | XXXXXXXXXX |
| 24 | 1000 | 742  | 21-Jan-13 | XXXXXXXXXX |
| 24 | 1050 | 1269 | 22-Jan-13 | XXXXXXXXXX |
| 24 | 1200 | 1082 | 21-Jan-13 | XXXXXXXXXX |
| 24 | 1000 | 548  | 14-Jan-13 | XXXXXXXXXX |
| 24 | 1000 | 577  | 14-Jan-13 | XXXXXXXXXX |
| 24 | 980  | 973  | 17-Jan-13 | XXXXXXXXXX |
| 24 | 900  | 787  | 16-Jan-13 | XXXXXXXXXX |
| 24 | 900  | 854  | 17-Jan-13 | XXXXXXXXXX |
| 24 | 1150 | 594  | 16-Jan-13 | XXXXXXXXXX |
| 24 | 1000 | 936  | 17-Jan-13 | XXXXXXXXXX |
| 24 | 1000 | 442  | 08-Jan-13 | XXXXXXXXXX |
| 24 | 950  | 331  | 07-Jan-13 | XXXXXXXXXX |
| 24 | 1200 | 1046 | 21-Jan-13 | XXXXXXXXXX |
| 24 | 1000 | 1283 | 22-Jan-13 | XXXXXXXXXX |
| 24 | 950  | 516  | 11-Jan-13 | XXXXXXXXXX |

|    |      |      |           |            |
|----|------|------|-----------|------------|
| 24 | 1000 | 530  | 09-Jan-13 | XXXXXXXXXX |
| 24 | 950  | 872  | 17-Jan-13 | XXXXXXXXXX |
| 24 | 900  | 640  | 17-Jan-13 | XXXXXXXXXX |
| 24 | 1000 | 439  | 14-Jan-13 | XXXXXXXXXX |
| 24 | 1000 | 1126 | 21-Jan-13 | XXXXXXXXXX |
| 24 | 960  | 842  | 17-Jan-13 | XXXXXXXXXX |
| 24 | 1000 | 455  | 09-Jan-13 | XXXXXXXXXX |
| 24 | 1100 | 800  | 22-Jan-13 | XXXXXXXXXX |
| 24 | 1020 | 734  | 21-Jan-13 | XXXXXXXXXX |
| 24 | 1200 | 647  | 15-Jan-13 | XXXXXXXXXX |
| 24 | 1200 | 667  | 15-Jan-13 | XXXXXXXXXX |
| 24 | 1000 | 672  | 15-Jan-13 | XXXXXXXXXX |
| 24 | 1000 | 435  | 08-Jan-13 | XXXXXXXXXX |
| 24 | 1000 | 1301 | 22-Jan-13 | XXXXXXXXXX |
| 18 | 350  | 596  | 15-Jan-13 | XXXXXXXXXX |
| 18 | 350  | 497  | 09-Jan-13 | XXXXXXXXXX |
| 18 | 300  | 1228 | 21-Jan-13 | XXXXXXXXXX |
| 18 | 300  | 498  | 10-Jan-13 | XXXXXXXXXX |
| 18 | 300  | 675  | 17-Jan-13 | XXXXXXXXXX |
| 18 | 300  | 345  | 07-Jan-13 | XXXXXXXXXX |
| 18 | 350  | 698  | 21-Jan-13 | XXXXXXXXXX |
| 18 | 300  | 1117 | 21-Jan-13 | XXXXXXXXXX |
| 18 | 950  | 517  | 11-Jan-13 | XXXXXXXXXX |
| 18 | 300  | 366  | 08-Jan-13 | XXXXXXXXXX |
| 18 | 300  | 670  | 15-Jan-13 | XXXXXXXXXX |
| 18 | 250  | 695  | 16-Jan-13 | XXXXXXXXXX |
| 24 | 450  | 838  | 17-Jan-13 | XXXXXXXXXX |
| 24 | 300  | 1277 | 22-Jan-13 | XXXXXXXXXX |
| 24 | 600  | 1197 | 21-Jan-13 | XXXXXXXXXX |
| 24 | 450  | 341  | 07-Jan-13 | XXXXXXXXXX |
| 24 | 400  | 1250 | 22-Jan-13 | XXXXXXXXXX |
| 24 | 350  | 384  | 07-Jan-13 | XXXXXXXXXX |
| 24 | 500  | 932  | 17-Jan-13 | XXXXXXXXXX |
| 24 | 850  | 792  | 16-Jan-13 | XXXXXXXXXX |
| 24 | 300  | 615  | 15-Jan-13 | XXXXXXXXXX |
| 24 | 300  | 426  | 08-Jan-13 | XXXXXXXXXX |
| 24 | 300  | 1285 | 22-Jan-13 | XXXXXXXXXX |
| 24 | 300  | 894  | 17-Jan-13 | XXXXXXXXXX |
| 24 | 300  | 924  | 17-Jan-13 | XXXXXXXXXX |
| 24 | 550  | 541  | 09-Jan-13 | XXXXXXXXXX |
| 24 | 500  | 946  | 17-Jan-13 | XXXXXXXXXX |
| 24 | 400  | 1089 | 21-Jan-13 | XXXXXXXXXX |
| 24 | 350  | 687  | 16-Jan-13 | XXXXXXXXXX |
| 24 | 350  | 1164 | 21-Jan-13 | XXXXXXXXXX |
| 24 | 300  | 374  | 07-Jan-13 | XXXXXXXXXX |
| 24 | 350  | 1258 | 22-Jan-13 | XXXXXXXXXX |
| 24 | 480  | 963  | 17-Jan-13 | XXXXXXXXXX |
| 24 | 400  | 1214 | 21-Jan-13 | XXXXXXXXXX |
| 24 | 450  | 408  | 08-Jan-13 | XXXXXXXXXX |
| 24 | 400  | 346  | 07-Jan-13 | XXXXXXXXXX |

|    |     |      |           |            |
|----|-----|------|-----------|------------|
| 24 | 400 | 396  | 08-Jan-13 | XXXXXXXXXX |
| 24 | 400 | 330  | 07-Jan-13 | XXXXXXXXXX |
| 24 | 400 | 1014 | 17-Jan-13 | XXXXXXXXXX |
| 24 | 350 | 501  | 09-Jan-13 | XXXXXXXXXX |
| 24 | 500 | 474  | 09-Jan-13 | XXXXXXXXXX |
| 24 | 700 | 884  | 17-Jan-13 | XXXXXXXXXX |
| 24 | 400 | 819  | 17-Jan-13 | XXXXXXXXXX |
| 24 | 500 | 1168 | 21-Jan-13 | XXXXXXXXXX |
| 24 | 500 | 451  | 09-Jan-13 | XXXXXXXXXX |
| 24 | 500 | 1190 | 21-Jan-13 | XXXXXXXXXX |
| 24 | 700 | 646  | 15-Jan-13 | XXXXXXXXXX |
| 24 | 300 | 1062 | 21-Jan-13 | XXXXXXXXXX |
| 24 | 500 | 789  | 22-Jan-13 | XXXXXXXXXX |
| 24 | 250 | 409  | 08-Jan-13 | XXXXXXXXXX |
| 24 | 600 | 389  | 08-Jan-13 | XXXXXXXXXX |
| 24 | 300 | 689  | 21-Jan-13 | XXXXXXXXXX |
| 24 | 400 | 691  | 21-Jan-13 | XXXXXXXXXX |
| 24 | 350 | 467  | 10-Jan-13 | XXXXXXXXXX |
| 24 | 350 | 374  | 07-Jan-13 | XXXXXXXXXX |
| 24 | 250 | 1118 | 21-Jan-13 | XXXXXXXXXX |
| 24 | 400 | 688  | 21-Jan-13 | XXXXXXXXXX |
| 24 | 350 | 497  | 10-Jan-13 | XXXXXXXXXX |
| 24 | 600 | 583  | 15-Jan-13 | XXXXXXXXXX |
| 24 | 500 | 531  | 16-Jan-13 | XXXXXXXXXX |
| 24 | 300 | 606  | 17-Jan-13 | XXXXXXXXXX |
| 24 | 500 | 674  | 17-Jan-13 | XXXXXXXXXX |
| 24 | 400 | 581  | 17-Jan-13 | XXXXXXXXXX |
| 24 | 400 | 387  | 09-Jan-13 | XXXXXXXXXX |
| 24 | 300 | 596  | 17-Jan-13 | XXXXXXXXXX |
| 24 | 400 | 615  | 16-Jan-13 | XXXXXXXXXX |
| 24 | 350 | 403  | 08-Jan-13 | XXXXXXXXXX |
| 24 | 400 | 406  | 10-Jan-13 | XXXXXXXXXX |
| 24 | 300 | 493  | 10-Jan-13 | XXXXXXXXXX |
| 24 | 400 | 614  | 17-Jan-13 | XXXXXXXXXX |
| 24 | 350 | 509  | 10-Jan-13 | XXXXXXXXXX |
| 24 | 520 | 735  | 21-Jan-13 | XXXXXXXXXX |
| 24 | 400 | 422  | 14-Jan-13 | XXXXXXXXXX |
| 24 | 300 | 478  | 10-Jan-13 | XXXXXXXXXX |
| 24 | 350 | 570  | 16-Jan-13 | XXXXXXXXXX |
| 24 | 350 | 665  | 21-Jan-13 | XXXXXXXXXX |
| 24 | 500 | 1175 | 21-Jan-13 | XXXXXXXXXX |
| 6  | 300 | 1012 | 17-Jan-13 | XXXXXXXXXX |
| 6  | 300 | 1125 | 21-Jan-13 | XXXXXXXXXX |
| 6  | 200 | 388  | 08-Jan-13 | XXXXXXXXXX |
| 6  | 200 |      |           | XXXXXXXXXX |
| 6  | 200 | 351  | 07-Jan-13 | XXXXXXXXXX |
| 6  | 250 | 1040 | 21-Jan-13 | XXXXXXXXXX |
| 6  | 250 | 931  | 17-Jan-13 | XXXXXXXXXX |
| 6  | 150 | 1287 | 22-Jan-13 | XXXXXXXXXX |
| 6  | 150 | 1141 | 21-Jan-13 | XXXXXXXXXX |

|    |      |      |           |            |
|----|------|------|-----------|------------|
| 6  | 350  | 771  | 16-Jan-13 | XXXXXXXXXX |
| 6  | 350  | 540  | 09-Jan-13 | XXXXXXXXXX |
| 6  | 150  | 1235 | 21-Jan-13 | XXXXXXXXXX |
| 6  | 300  | 485  | 15-Jan-13 | XXXXXXXXXX |
| 6  | 200  | 499  | 10-Jan-13 | XXXXXXXXXX |
| 6  | 250  | 788  | 16-Jan-13 | XXXXXXXXXX |
| 6  | 300  | 585  | 17-Jan-13 | XXXXXXXXXX |
| 6  | 220  | 597  | 17-Jan-13 | XXXXXXXXXX |
| 6  | 350  | 407  | 08-Jan-13 | XXXXXXXXXX |
| 6  | 150  | 343  | 07-Jan-13 | XXXXXXXXXX |
| 6  | 150  | 400  | 08-Jan-13 | XXXXXXXXXX |
| 6  | 150  | 1119 | 21-Jan-13 | XXXXXXXXXX |
| 6  | 200  | 604  | 16-Jan-13 | XXXXXXXXXX |
| 6  | 200  | 801  | 16-Jan-13 | XXXXXXXXXX |
| 6  | 350  | 405  | 10-Jan-13 | XXXXXXXXXX |
| 6  | 200  | 487  | 10-Jan-13 | XXXXXXXXXX |
| 6  | 1250 | 640  | 15-Jan-13 | XXXXXXXXXX |
| 6  | 300  | 660  | 15-Jan-13 | XXXXXXXXXX |
| 6  | 300  | 1097 | 21-Jan-13 | XXXXXXXXXX |
| 6  | 250  | 347  | 08-Jan-13 | XXXXXXXXXX |
| 6  | 250  | 1024 | 21-Jan-13 | XXXXXXXXXX |
| 6  | 180  | 680  | 21-Jan-13 | XXXXXXXXXX |
| 6  | 200  | 421  | 14-Jan-13 | XXXXXXXXXX |
| 6  | 500  | 689  | 16-Jan-13 | XXXXXXXXXX |
| 6  | 250  | 376  | 08-Jan-13 | XXXXXXXXXX |
| 6  | 250  | 505  | 15-Jan-13 | XXXXXXXXXX |
| 6  | 100  | 765  | 21-Jan-13 | XXXXXXXXXX |
| 12 | 300  | 681  | 21-Jan-13 | XXXXXXXXXX |
| 12 | 300  | 1013 | 17-Jan-13 | XXXXXXXXXX |
| 12 | 250  | 550  | 16-Jan-13 | XXXXXXXXXX |
| 12 | 350  | 784  | 22-Jan-13 | XXXXXXXXXX |
| 12 | 300  | 1124 | 21-Jan-13 | XXXXXXXXXX |
| 12 | 200  | 1213 | 21-Jan-13 | XXXXXXXXXX |
| 12 | 250  | 352  | 07-Jan-13 | XXXXXXXXXX |
| 12 | 250  | 1041 | 21-Jan-13 | XXXXXXXXXX |
| 12 | 200  | 981  | 17-Jan-13 | XXXXXXXXXX |
| 12 | 250  | 425  | 08-Jan-13 | XXXXXXXXXX |
| 12 | 200  | 1286 | 22-Jan-13 | XXXXXXXXXX |
| 12 | 300  | 895  | 17-Jan-13 | XXXXXXXXXX |
| 12 | 200  | 633  | 15-Jan-13 | XXXXXXXXXX |
| 12 | 250  | 437  | 08-Jan-13 | XXXXXXXXXX |
| 12 | 280  | 725  | 16-Jan-13 | XXXXXXXXXX |
| 12 | 200  | 607  | 17-Jan-13 | XXXXXXXXXX |
| 12 | 250  | 614  | 16-Jan-13 | XXXXXXXXXX |
| 12 | 300  | 346  | 07-Jan-13 | XXXXXXXXXX |
| 12 | 200  | 344  | 07-Jan-13 | XXXXXXXXXX |
| 12 | 250  | 393  | 08-Jan-13 | XXXXXXXXXX |
| 12 | 150  | 1030 | 21-Jan-13 | XXXXXXXXXX |
| 12 | 250  | 814  | 16-Jan-13 | XXXXXXXXXX |
| 12 | 300  | 1044 | 21-Jan-13 | XXXXXXXXXX |



|    |     |      |           |            |
|----|-----|------|-----------|------------|
| 12 | 200 | 359  | 07-Jan-13 | XXXXXXXXXX |
| 12 | 300 | 696  | 21-Jan-13 | XXXXXXXXXX |
| 12 | 450 | 447  | 09-Jan-13 | XXXXXXXXXX |
| 12 | 250 | 865  | 17-Jan-13 | XXXXXXXXXX |
| 12 | 350 | 407  | 10-Jan-13 | XXXXXXXXXX |
| 12 | 200 | 505  | 09-Jan-13 | XXXXXXXXXX |
| 12 | 250 | 461  | 08-Jan-13 | XXXXXXXXXX |
| 12 | 250 | 396  | 08-Jan-13 | XXXXXXXXXX |
| 12 | 350 | 367  | 07-Jan-13 | XXXXXXXXXX |
| 24 | 550 | 912  | 17-Jan-13 | XXXXXXXXXX |
| 24 | 500 | 454  | 09-Jan-13 | XXXXXXXXXX |
| 24 | 460 | 727  | 21-Jan-13 | XXXXXXXXXX |
| 24 | 600 | 913  | 17-Jan-13 | XXXXXXXXXX |
| 24 | 700 | 453  | 14-Jan-13 | XXXXXXXXXX |
| 24 | 650 | 743  | 21-Jan-13 | XXXXXXXXXX |
| 24 | 600 | 966  | 17-Jan-13 | XXXXXXXXXX |
| 24 | 650 | 941  | 17-Jan-13 | XXXXXXXXXX |
| 24 | 640 | 529  | 11-Jan-13 | XXXXXXXXXX |
| 24 | 650 | 586  | 16-Jan-13 | XXXXXXXXXX |
| 24 | 630 | 475  | 09-Jan-13 | XXXXXXXXXX |
| 24 | 750 | 1307 | 22-Jan-13 | XXXXXXXXXX |
| 24 | 750 | 431  | 08-Jan-13 | XXXXXXXXXX |
| 6  | 300 | 538  | 09-Jan-13 | XXXXXXXXXX |
| 6  |     | 710  | 16-Jan-13 | XXXXXXXXXX |
| 6  | 200 | 523  | 16-Jan-13 | XXXXXXXXXX |
| 6  | 250 | 955  | 17-Jan-13 | XXXXXXXXXX |
| 12 | 300 | 793  | 16-Jan-13 | XXXXXXXXXX |
| 12 | 150 | 1106 | 21-Jan-13 | XXXXXXXXXX |
| 12 | 350 | 1008 | 17-Jan-13 | XXXXXXXXXX |
| 12 | 200 | 706  | 21-Jan-13 | XXXXXXXXXX |
| 24 | 350 | 1196 | 21-Jan-13 | XXXXXXXXXX |
| 24 | 350 | 976  | 17-Jan-13 | XXXXXXXXXX |
| 24 | 350 | 1230 | 21-Jan-13 | XXXXXXXXXX |
| 24 | 350 | 901  | 17-Jan-13 | XXXXXXXXXX |
| 24 | 250 | 804  | 16-Jan-13 | XXXXXXXXXX |
| 24 | 400 | 818  | 17-Jan-13 | XXXXXXXXXX |
| 24 | 300 | 488  | 10-Jan-13 | XXXXXXXXXX |
| 24 | 300 | 716  | 21-Jan-13 | XXXXXXXXXX |
| 24 | 280 | 392  | 08-Jan-13 | XXXXXXXXXX |
| 24 | 550 | 663  | 17-Jan-13 | XXXXXXXXXX |
| 24 | 600 | 507  | 09-Jan-13 | XXXXXXXXXX |
| 12 | 650 | 775  | 16-Jan-13 | XXXXXXXXXX |
| 24 | 350 | 599  | 17-Jan-13 | XXXXXXXXXX |
| 12 |     | 757  | 16-Jan-13 | XXXXXXXXXX |
| 6  | 250 | 615  | 15-Jan-13 | XXXXXXXXXX |
| 6  | 150 |      |           | XXXXXXXXXX |
| 6  | 300 | 795  | 16-Jan-13 | XXXXXXXXXX |
| 6  | 200 | 598  | 15-Jan-13 | XXXXXXXXXX |
| 6  | 250 | 1322 | 22-Jan-13 | XXXXXXXXXX |
| 6  | 250 | 1178 | 21-Jan-13 | XXXXXXXXXX |

|    |     |      |           |            |
|----|-----|------|-----------|------------|
| 6  | 100 | 909  | 17-Jan-13 | XXXXXXXXXX |
| 6  | 150 | 724  | 16-Jan-13 | XXXXXXXXXX |
| 6  | 200 | 1146 | 21-Jan-13 | XXXXXXXXXX |
| 6  | 250 | 769  | 16-Jan-13 | XXXXXXXXXX |
| 6  | 150 | 480  | 15-Jan-13 | XXXXXXXXXX |
| 6  | 250 | 512  | 09-Jan-13 | XXXXXXXXXX |
| 6  | 300 | 660  | 18-Jan-13 | XXXXXXXXXX |
| 6  | 100 | 592  | 16-Jan-13 | XXXXXXXXXX |
| 6  | 400 | 349  | 07-Jan-13 | XXXXXXXXXX |
| 6  | 300 | 499  | 09-Jan-13 | XXXXXXXXXX |
| 6  | 250 | 660  | 17-Jan-13 | XXXXXXXXXX |
| 6  | 200 | 733  | 16-Jan-13 | XXXXXXXXXX |
| 6  | 150 | 669  | 15-Jan-13 | XXXXXXXXXX |
| 6  | 200 | 425  | 14-Jan-13 | XXXXXXXXXX |
| 12 | 350 | 835  | 17-Jan-13 | XXXXXXXXXX |
| 12 | 350 | 1023 | 21-Jan-13 | XXXXXXXXXX |
| 12 | 150 |      |           | XXXXXXXXXX |
| 12 | 200 | 541  | 16-Jan-13 | XXXXXXXXXX |
| 12 | 250 | 1179 | 21-Jan-13 | XXXXXXXXXX |
| 12 | 250 | 410  | 10-Jan-13 | XXXXXXXXXX |
| 12 | 150 | 1233 | 21-Jan-13 | XXXXXXXXXX |
| 12 | 200 | 949  | 17-Jan-13 | XXXXXXXXXX |
| 12 | 250 | 529  | 16-Jan-13 | XXXXXXXXXX |
| 12 | 250 | 608  | 17-Jan-13 | XXXXXXXXXX |
| 12 | 400 | 937  | 17-Jan-13 | XXXXXXXXXX |
| 12 | 400 | 656  | 18-Jan-13 | XXXXXXXXXX |
| 12 | 350 | 773  | 22-Jan-13 | XXXXXXXXXX |
| 12 |     |      |           | XXXXXXXXXX |
| 12 | 200 | 697  | 21-Jan-13 | XXXXXXXXXX |
| 12 | 150 | 1033 | 21-Jan-13 | XXXXXXXXXX |
| 12 | 250 | 821  | 17-Jan-13 | XXXXXXXXXX |
| 12 | 250 | 822  | 17-Jan-13 | XXXXXXXXXX |
| 12 | 160 | 469  | 09-Jan-13 | XXXXXXXXXX |
| 12 | 250 | 394  | 09-Jan-13 | XXXXXXXXXX |
| 12 | 200 | 348  | 08-Jan-13 | XXXXXXXXXX |
| 12 | 120 | 848  | 17-Jan-13 | XXXXXXXXXX |
| 12 | 200 | 1224 | 21-Jan-13 | XXXXXXXXXX |
| 18 | 230 | 445  | 14-Jan-13 | XXXXXXXXXX |
| 18 | 200 | 377  | 08-Jan-13 | XXXXXXXXXX |
| 18 | 100 | 728  | 21-Jan-13 | XXXXXXXXXX |
| 24 | 750 | 834  | 17-Jan-13 | XXXXXXXXXX |
| 24 | 300 | 680  | 21-Jan-13 | XXXXXXXXXX |
| 24 | 500 | 718  | 21-Jan-13 | XXXXXXXXXX |
| 24 | 300 | 1003 | 17-Jan-13 | XXXXXXXXXX |
| 24 | 300 | 548  | 16-Jan-13 | XXXXXXXXXX |
| 24 | 350 | 1198 | 21-Jan-13 | XXXXXXXXXX |
| 24 | 600 | 1121 | 21-Jan-13 | XXXXXXXXXX |
| 24 | 300 | 710  | 21-Jan-13 | XXXXXXXXXX |
| 24 | 200 | 368  | 07-Jan-13 | XXXXXXXXXX |
| 24 | 250 | 358  | 07-Jan-13 | XXXXXXXXXX |

|    |     |      |           |            |
|----|-----|------|-----------|------------|
| 24 | 300 | 383  | 07-Jan-13 | XXXXXXXXXX |
| 24 | 300 | 1241 | 22-Jan-13 | XXXXXXXXXX |
| 24 | 350 | 717  | 16-Jan-13 | XXXXXXXXXX |
| 24 | 350 | 387  | 07-Jan-13 | XXXXXXXXXX |
| 24 | 30  | 1039 | 21-Jan-13 | XXXXXXXXXX |
| 24 | 350 | 417  | 14-Jan-13 | XXXXXXXXXX |
| 24 | 600 | 982  | 17-Jan-13 | XXXXXXXXXX |
| 24 | 300 | 468  | 14-Jan-13 | XXXXXXXXXX |
| 24 | 300 | 636  | 17-Jan-13 | XXXXXXXXXX |
| 24 | 300 | 419  | 08-Jan-13 | XXXXXXXXXX |
| 24 | 300 | 551  | 16-Jan-13 | XXXXXXXXXX |
| 24 | 350 | 535  | 09-Jan-13 | XXXXXXXXXX |
| 24 | 300 | 1150 | 21-Jan-13 | XXXXXXXXXX |
| 24 | 350 | 892  | 17-Jan-13 | XXXXXXXXXX |
| 24 | 300 | 925  | 17-Jan-13 | XXXXXXXXXX |
| 24 | 350 | 1180 | 21-Jan-13 | XXXXXXXXXX |
| 24 | 300 | 1147 | 21-Jan-13 | XXXXXXXXXX |
| 24 | 250 | 522  | 16-Jan-13 | XXXXXXXXXX |
| 24 | 500 | 945  | 17-Jan-13 | XXXXXXXXXX |
| 24 | 350 | 1090 | 21-Jan-13 | XXXXXXXXXX |
| 24 | 300 | 1160 | 21-Jan-13 | XXXXXXXXXX |
| 24 | 450 | 950  | 17-Jan-13 | XXXXXXXXXX |
| 24 | 300 | 443  | 14-Jan-13 | XXXXXXXXXX |
| 24 | 400 | 1256 | 22-Jan-13 | XXXXXXXXXX |
| 24 | 350 | 630  | 17-Jan-13 | XXXXXXXXXX |
| 24 | 350 | 597  | 16-Jan-13 | XXXXXXXXXX |
| 24 | 300 | 672  | 17-Jan-13 | XXXXXXXXXX |
| 24 | 350 | 580  | 17-Jan-13 | XXXXXXXXXX |
| 24 | 300 | 600  | 16-Jan-13 | XXXXXXXXXX |
| 24 | 450 | 774  | 22-Jan-13 | XXXXXXXXXX |
| 24 | 350 | 404  | 08-Jan-13 | XXXXXXXXXX |
| 24 | 450 | 425  | 08-Jan-13 | XXXXXXXXXX |
| 24 | 300 | 455  | 08-Jan-13 | XXXXXXXXXX |
| 24 | 250 | 698  | 21-Jan-13 | XXXXXXXXXX |
| 24 | 250 | 498  | 15-Jan-13 | XXXXXXXXXX |
| 24 | 250 | 1031 | 21-Jan-13 | XXXXXXXXXX |
| 24 | 500 | 1176 | 21-Jan-13 | XXXXXXXXXX |
| 24 | 350 | 1051 | 21-Jan-13 | XXXXXXXXXX |
| 24 | 300 | 476  | 10-Jan-13 | XXXXXXXXXX |
| 24 | 250 | 380  | 08-Jan-13 | XXXXXXXXXX |
| 24 | 350 | 695  | 21-Jan-13 | XXXXXXXXXX |
| 24 | 250 | 363  | 07-Jan-13 | XXXXXXXXXX |
| 24 | 800 | 617  | 15-Jan-13 | XXXXXXXXXX |
| 24 | 400 | 526  | 09-Jan-13 | XXXXXXXXXX |
| 24 | 300 | 500  | 09-Jan-13 | XXXXXXXXXX |
| 24 | 400 | 643  | 17-Jan-13 | XXXXXXXXXX |
| 24 | 500 | 645  | 17-Jan-13 | XXXXXXXXXX |
| 24 | 550 | 620  | 15-Jan-13 | XXXXXXXXXX |
| 24 | 300 | 570  | 14-Jan-13 | XXXXXXXXXX |
| 24 | 480 | 508  | 09-Jan-13 | XXXXXXXXXX |

|    |     |      |           |            |
|----|-----|------|-----------|------------|
| 24 | 500 | 403  | 10-Jan-13 | XXXXXXXXXX |
| 24 | 400 | 823  | 17-Jan-13 | XXXXXXXXXX |
| 24 | 300 | 489  | 10-Jan-13 | XXXXXXXXXX |
| 24 | 250 | 370  | 08-Jan-13 | XXXXXXXXXX |
| 24 | 250 | 609  | 17-Jan-13 | XXXXXXXXXX |
| 24 | 500 | 462  | 09-Jan-13 | XXXXXXXXXX |
| 24 | 400 | 687  | 21-Jan-13 | XXXXXXXXXX |
| 24 | 250 | 732  | 21-Jan-13 | XXXXXXXXXX |
| 24 | 400 | 1226 | 21-Jan-13 | XXXXXXXXXX |
| 24 | 450 | 759  | 16-Jan-13 | XXXXXXXXXX |
| 24 | 550 | 652  | 15-Jan-13 | XXXXXXXXXX |
| 24 | 300 | 557  | 14-Jan-13 | XXXXXXXXXX |
| 24 | 300 | 424  | 14-Jan-13 | XXXXXXXXXX |
| 24 | 300 | 602  | 15-Jan-13 | XXXXXXXXXX |
| 24 | 300 | 702  | 21-Jan-13 | XXXXXXXXXX |
| 24 | 300 | 1060 | 21-Jan-13 | XXXXXXXXXX |
| 24 | 300 | 539  | 11-Jan-13 | XXXXXXXXXX |
| 24 | 200 | 569  | 16-Jan-13 | XXXXXXXXXX |
| 24 | 280 | 393  | 08-Jan-13 | XXXXXXXXXX |
| 18 | 450 | 488  | 15-Jan-13 | XXXXXXXXXX |
| 6  | 300 | 487  | 15-Jan-13 | XXXXXXXXXX |
| 12 | 350 | 560  | 16-Jan-13 | XXXXXXXXXX |
| 6  | 280 | 522  | 11-Jan-13 | XXXXXXXXXX |
| 6  | 350 | 459  | 09-Jan-13 | XXXXXXXXXX |
| 18 | 530 | 523  | 11-Jan-13 | XXXXXXXXXX |
| 24 | 650 | 524  | 11-Jan-13 | XXXXXXXXXX |
| 24 | 600 | 1006 | 17-Jan-13 | XXXXXXXXXX |
| 24 | 700 | 786  | 22-Jan-13 | XXXXXXXXXX |
| 24 | 700 | 592  | 15-Jan-13 | XXXXXXXXXX |
| 24 | 600 | 492  | 09-Jan-13 | XXXXXXXXXX |
| 24 | 600 | 638  | 18-Jan-13 | XXXXXXXXXX |
| 24 | 550 | 466  | 10-Jan-13 | XXXXXXXXXX |
| 24 | 600 | 550  | 11-Jan-13 | XXXXXXXXXX |
| 24 | 600 | 906  | 17-Jan-13 | XXXXXXXXXX |
| 24 | 650 | 401  | 09-Jan-13 | XXXXXXXXXX |
| 24 | 550 | 482  | 15-Jan-13 | XXXXXXXXXX |
| 24 | 650 | 860  | 17-Jan-13 | XXXXXXXXXX |
| 24 | 550 | 622  | 17-Jan-13 | XXXXXXXXXX |
| 24 | 550 | 690  | 21-Jan-13 | XXXXXXXXXX |
| 24 | 500 | 650  | 15-Jan-13 | XXXXXXXXXX |
| 24 | 600 | 506  | 15-Jan-13 | XXXXXXXXXX |
| 24 | 600 | 889  | 17-Jan-13 | XXXXXXXXXX |
| 24 | 400 | 687  | 21-Jan-13 | XXXXXXXXXX |
| 24 | 500 | 478  | 09-Jan-13 | XXXXXXXXXX |
| 12 | 650 | 537  | 16-Jan-13 | XXXXXXXXXX |
| 12 | 600 | 435  | 08-Jan-13 | XXXXXXXXXX |
| 12 | 650 | 1244 | 22-Jan-13 | XXXXXXXXXX |
| 12 | 650 | 338  | 07-Jan-13 | XXXXXXXXXX |
| 12 | 450 | 805  | 16-Jan-13 | XXXXXXXXXX |
| 12 | 500 | 633  | 17-Jan-13 | XXXXXXXXXX |

|    |     |      |           |            |
|----|-----|------|-----------|------------|
| 12 | 550 | 1010 | 17-Jan-13 | XXXXXXXXXX |
| 12 | 700 | 790  | 22-Jan-13 | XXXXXXXXXX |
| 12 | 550 | 1042 | 21-Jan-13 | XXXXXXXXXX |
| 12 | 550 | 468  | 10-Jan-13 | XXXXXXXXXX |
| 12 | 500 | 898  | 17-Jan-13 | XXXXXXXXXX |
| 12 | 650 | 1245 | 22-Jan-13 | XXXXXXXXXX |
| 12 | 650 | 607  | 15-Jan-13 | XXXXXXXXXX |
| 12 | 600 | 405  | 08-Jan-13 | XXXXXXXXXX |
| 12 | 650 | 421  | 08-Jan-13 | XXXXXXXXXX |
| 12 | 600 | 823  | 22-Jan-13 | XXXXXXXXXX |
| 12 | 700 | 589  | 16-Jan-13 | XXXXXXXXXX |
| 12 | 700 | 881  | 17-Jan-13 | XXXXXXXXXX |
| 12 | 700 | 922  | 17-Jan-13 | XXXXXXXXXX |
| 12 | 500 | 845  | 17-Jan-13 | XXXXXXXXXX |
| 12 | 600 | 1309 | 22-Jan-13 | XXXXXXXXXX |
| 12 | 500 | 688  | 16-Jan-13 | XXXXXXXXXX |
| 12 | 380 | 764  | 16-Jan-13 | XXXXXXXXXX |
| 12 | 450 | 447  | 14-Jan-13 | XXXXXXXXXX |
| 12 | 550 | 652  | 18-Jan-13 | XXXXXXXXXX |
| 12 | 550 | 462  | 10-Jan-13 | XXXXXXXXXX |
| 12 | 400 | 451  | 14-Jan-13 | XXXXXXXXXX |
| 12 | 470 | 514  | 11-Jan-13 | XXXXXXXXXX |
| 12 | 650 | 628  | 17-Jan-13 | XXXXXXXXXX |
| 12 | 300 | 610  | 17-Jan-13 | XXXXXXXXXX |
| 12 | 600 | 585  | 15-Jan-13 | XXXXXXXXXX |
| 12 | 700 | 587  | 15-Jan-13 | XXXXXXXXXX |
| 12 | 650 | 458  | 14-Jan-13 | XXXXXXXXXX |
| 6  | 600 | 335  | 07-Jan-13 | XXXXXXXXXX |
| 6  | 600 | 381  | 07-Jan-13 | XXXXXXXXXX |
| 6  | 650 | 419  | 14-Jan-13 | XXXXXXXXXX |
| 6  | 600 | 984  | 17-Jan-13 | XXXXXXXXXX |
| 6  | 700 | 459  | 14-Jan-13 | XXXXXXXXXX |
| 6  | 650 | 606  | 15-Jan-13 | XXXXXXXXXX |
| 6  | 540 | 959  | 17-Jan-13 | XXXXXXXXXX |
| 6  | 700 | 667  | 17-Jan-13 | XXXXXXXXXX |
| 6  |     | 450  | 08-Jan-13 | XXXXXXXXXX |
| 6  | 550 | 403  | 08-Jan-13 | XXXXXXXXXX |
| 6  | 750 | 824  | 22-Jan-13 | XXXXXXXXXX |
| 6  | 600 | 809  | 16-Jan-13 | XXXXXXXXXX |
| 6  | 750 | 619  | 15-Jan-13 | XXXXXXXXXX |
| 6  | 600 | 564  | 14-Jan-13 | XXXXXXXXXX |
| 6  | 700 | 622  | 17-Jan-13 | XXXXXXXXXX |
| 6  | 600 | 1099 | 21-Jan-13 | XXXXXXXXXX |
| 6  | 600 | 1155 | 21-Jan-13 | XXXXXXXXXX |
| 6  | 600 | 560  | 14-Jan-13 | XXXXXXXXXX |
| 6  | 650 | 696  | 16-Jan-13 | XXXXXXXXXX |
| 6  | 550 | 574  | 16-Jan-13 | XXXXXXXXXX |
| 6  | 500 | 664  | 21-Jan-13 | XXXXXXXXXX |
| 6  | 500 | 537  | 11-Jan-13 | XXXXXXXXXX |
| 6  | 550 | 364  | 07-Jan-13 | XXXXXXXXXX |

|    |     |      |           |            |
|----|-----|------|-----------|------------|
| 6  | 600 | 645  | 18-Jan-13 | XXXXXXXXXX |
| 6  | 550 | 376  | 07-Jan-13 | XXXXXXXXXX |
| 6  | 600 | 481  | 09-Jan-13 | XXXXXXXXXX |
| 6  | 600 | 988  | 17-Jan-13 | XXXXXXXXXX |
| 6  | 600 | 442  | 14-Jan-13 | XXXXXXXXXX |
| 6  | 540 | 960  | 17-Jan-13 | XXXXXXXXXX |
| 6  | 600 | 634  | 17-Jan-13 | XXXXXXXXXX |
| 6  | 700 | 423  | 08-Jan-13 | XXXXXXXXXX |
| 6  | 650 | 1048 | 21-Jan-13 | XXXXXXXXXX |
| 6  | 550 | 1280 | 22-Jan-13 | XXXXXXXXXX |
| 6  | 600 | 518  | 11-Jan-13 | XXXXXXXXXX |
| 6  | 650 | 621  | 15-Jan-13 | XXXXXXXXXX |
| 6  | 600 | 587  | 16-Jan-13 | XXXXXXXXXX |
| 6  | 600 | 569  | 14-Jan-13 | XXXXXXXXXX |
| 6  | 650 | 620  | 17-Jan-13 | XXXXXXXXXX |
| 6  | 650 | 506  | 09-Jan-13 | XXXXXXXXXX |
| 6  | 600 | 1103 | 21-Jan-13 | XXXXXXXXXX |
| 6  | 650 | 620  | 17-Jan-13 | XXXXXXXXXX |
| 6  | 700 | 1303 | 22-Jan-13 | XXXXXXXXXX |
| 6  | 650 | 985  | 17-Jan-13 | XXXXXXXXXX |
| 6  | 650 | 1246 | 22-Jan-13 | XXXXXXXXXX |
| 6  | 650 | 613  | 15-Jan-13 | XXXXXXXXXX |
| 6  | 800 | 443  | 08-Jan-13 | XXXXXXXXXX |
| 6  | 700 | 402  | 08-Jan-13 | XXXXXXXXXX |
| 6  | 630 | 531  | 11-Jan-13 | XXXXXXXXXX |
| 6  | 700 | 513  | 15-Jan-13 | XXXXXXXXXX |
| 6  | 480 | 967  | 17-Jan-13 | XXXXXXXXXX |
| 6  | 570 | 533  | 11-Jan-13 | XXXXXXXXXX |
| 6  | 600 | 590  | 16-Jan-13 | XXXXXXXXXX |
| 6  | 600 | 1329 | 22-Jan-13 | XXXXXXXXXX |
| 6  | 700 | 551  | 14-Jan-13 | XXXXXXXXXX |
| 6  | 650 | 437  | 08-Jan-13 | XXXXXXXXXX |
| 6  | 750 | 479  | 15-Jan-13 | XXXXXXXXXX |
| 6  | 750 | 777  | 22-Jan-13 | XXXXXXXXXX |
| 6  | 750 | 760  | 16-Jan-13 | XXXXXXXXXX |
| 12 | 650 | 1084 | 21-Jan-13 | XXXXXXXXXX |
| 6  | 800 | 1120 | 21-Jan-13 | XXXXXXXXXX |
| 6  | 500 | 344  | 07-Jan-13 | XXXXXXXXXX |
| 6  | 600 | 582  | 15-Jan-13 | XXXXXXXXXX |
| 6  | 500 | 1057 | 21-Jan-13 | XXXXXXXXXX |
| 6  | 700 | 584  | 15-Jan-13 | XXXXXXXXXX |
| 6  | 550 | 469  | 10-Jan-13 | XXXXXXXXXX |
| 6  | 550 | 483  | 09-Jan-13 | XXXXXXXXXX |
| 6  | 550 | 399  | 08-Jan-13 | XXXXXXXXXX |
| 6  | 700 | 629  | 17-Jan-13 | XXXXXXXXXX |
| 6  | 550 | 570  | 14-Jan-13 | XXXXXXXXXX |
| 6  | 600 | 691  | 21-Jan-13 | XXXXXXXXXX |
| 6  | 600 | 1087 | 21-Jan-13 | XXXXXXXXXX |
| 6  | 600 | 382  | 07-Jan-13 | XXXXXXXXXX |
| 6  |     |      |           | XXXXXXXXXX |

|   |     |      |           |            |
|---|-----|------|-----------|------------|
| 6 |     | 722  | 16-Jan-13 | XXXXXXXXXX |
| 6 | 550 | 595  | 16-Jan-13 | XXXXXXXXXX |
| 6 | 650 | 940  | 17-Jan-13 | XXXXXXXXXX |
| 6 | 750 | 827  | 22-Jan-13 | XXXXXXXXXX |
| 6 | 550 | 1094 | 21-Jan-13 | XXXXXXXXXX |
| 6 | 300 | 715  | 21-Jan-13 | XXXXXXXXXX |
| 6 | 500 | 617  | 16-Jan-13 | XXXXXXXXXX |
| 6 | 550 | 679  | 21-Jan-13 | XXXXXXXXXX |
| 6 | 600 | 1219 | 21-Jan-13 | XXXXXXXXXX |
| 6 | 500 | 644  | 15-Jan-13 | XXXXXXXXXX |
| 6 | 900 | 370  | 07-Jan-13 | XXXXXXXXXX |
| 6 | 500 | 595  | 15-Jan-13 | XXXXXXXXXX |
| 6 | 600 | 586  | 15-Jan-13 | XXXXXXXXXX |
| 6 | 550 | 549  | 11-Jan-13 | XXXXXXXXXX |
| 6 | 700 | 457  | 14-Jan-13 | XXXXXXXXXX |
| 6 | 750 | 972  | 17-Jan-13 | XXXXXXXXXX |
| 6 | 540 | 965  | 17-Jan-13 | XXXXXXXXXX |
| 6 | 600 | 628  | 17-Jan-13 | XXXXXXXXXX |
| 6 | 600 | 599  | 16-Jan-13 | XXXXXXXXXX |
| 6 | 800 | 451  | 08-Jan-13 | XXXXXXXXXX |
| 6 | 550 | 395  | 08-Jan-13 | XXXXXXXXXX |
| 6 | 650 | 812  | 16-Jan-13 | XXXXXXXXXX |
| 6 | 570 | 520  | 11-Jan-13 | XXXXXXXXXX |
| 6 | 650 | 625  | 15-Jan-13 | XXXXXXXXXX |
| 6 | 600 | 623  | 17-Jan-13 | XXXXXXXXXX |
| 6 | 600 | 371  | 08-Jan-13 | XXXXXXXXXX |
| 6 | 530 | 663  | 21-Jan-13 | XXXXXXXXXX |
| 6 | 650 | 832  | 17-Jan-13 | XXXXXXXXXX |
| 6 | 600 | 1201 | 21-Jan-13 | XXXXXXXXXX |
| 6 | 750 | 1112 | 21-Jan-13 | XXXXXXXXXX |
| 6 | 800 | 624  | 17-Jan-13 | XXXXXXXXXX |
| 6 | 550 | 402  | 08-Jan-13 | XXXXXXXXXX |
| 6 | 750 | 826  | 22-Jan-13 | XXXXXXXXXX |
| 6 | 500 | 1018 | 17-Jan-13 | XXXXXXXXXX |
| 6 | 600 | 337  | 07-Jan-13 | XXXXXXXXXX |
| 6 | 600 | 662  | 17-Jan-13 | XXXXXXXXXX |
| 6 |     |      |           | XXXXXXXXXX |
| 6 | 550 | 957  | 17-Jan-13 | XXXXXXXXXX |
| 6 | 650 | 542  | 16-Jan-13 | XXXXXXXXXX |
| 6 | 650 | 373  | 07-Jan-13 | XXXXXXXXXX |
| 6 | 800 | 1324 | 22-Jan-13 | XXXXXXXXXX |
| 6 | 650 | 339  | 07-Jan-13 | XXXXXXXXXX |
| 6 | 500 | 347  | 07-Jan-13 | XXXXXXXXXX |
| 6 | 650 | 1314 | 22-Jan-13 | XXXXXXXXXX |
| 6 | 650 | 1200 | 21-Jan-13 | XXXXXXXXXX |
| 6 | 750 | 473  | 15-Jan-13 | XXXXXXXXXX |
| 6 | 700 | 485  | 09-Jan-13 | XXXXXXXXXX |
| 6 | 750 | 813  | 22-Jan-13 | XXXXXXXXXX |
| 6 | 600 | 604  | 15-Jan-13 | XXXXXXXXXX |
| 6 | 650 | 942  | 17-Jan-13 | XXXXXXXXXX |

|   |     |      |           |            |
|---|-----|------|-----------|------------|
| 6 | 800 | 452  | 08-Jan-13 | XXXXXXXXXX |
| 6 | 570 | 528  | 11-Jan-13 | XXXXXXXXXX |
| 6 | 650 | 627  | 15-Jan-13 | XXXXXXXXXX |
| 6 | 750 | 662  | 15-Jan-13 | XXXXXXXXXX |
| 6 | 540 | 737  | 21-Jan-13 | XXXXXXXXXX |
| 6 | 600 | 489  | 09-Jan-13 | XXXXXXXXXX |
| 6 | 750 | 415  | 10-Jan-13 | XXXXXXXXXX |
| 6 | 600 | 551  | 11-Jan-13 | XXXXXXXXXX |
| 6 | 650 | 397  | 09-Jan-13 | XXXXXXXXXX |
| 6 | 650 | 581  | 15-Jan-13 | XXXXXXXXXX |
| 6 | 600 | 633  | 17-Jan-13 | XXXXXXXXXX |
| 6 | 600 | 534  | 11-Jan-13 | XXXXXXXXXX |
| 6 | 650 | 629  | 15-Jan-13 | XXXXXXXXXX |
| 6 | 600 | 582  | 16-Jan-13 | XXXXXXXXXX |
| 6 | 750 | 435  | 14-Jan-13 | XXXXXXXXXX |
| 6 | 700 | 681  | 21-Jan-13 | XXXXXXXXXX |
| 6 | 600 | 463  | 14-Jan-13 | XXXXXXXXXX |
| 6 | 650 | 797  | 16-Jan-13 | XXXXXXXXXX |
| 6 | 700 | 896  | 17-Jan-13 | XXXXXXXXXX |
| 6 | 850 | 765  | 16-Jan-13 | XXXXXXXXXX |
| 6 | 750 | 1068 | 21-Jan-13 | XXXXXXXXXX |
| 6 | 700 | 515  | 09-Jan-13 | XXXXXXXXXX |
| 6 | 650 | 1047 | 21-Jan-13 | XXXXXXXXXX |
| 6 | 750 | 527  | 09-Jan-13 | XXXXXXXXXX |
| 6 | 700 | 879  | 17-Jan-13 | XXXXXXXXXX |
| 6 | 600 | 817  | 17-Jan-13 | XXXXXXXXXX |
| 6 | 750 | 761  | 16-Jan-13 | XXXXXXXXXX |
| 6 | 600 | 561  | 14-Jan-13 | XXXXXXXXXX |
| 6 | 850 | 758  | 16-Jan-13 | XXXXXXXXXX |
| 6 | 600 | 799  | 16-Jan-13 | XXXXXXXXXX |
| 6 | 750 | 790  | 16-Jan-13 | XXXXXXXXXX |
| 6 | 600 | 535  | 16-Jan-13 | XXXXXXXXXX |
| 6 | 650 | 340  | 07-Jan-13 | XXXXXXXXXX |
| 6 | 550 | 682  | 21-Jan-13 | XXXXXXXXXX |
| 6 | 550 | 446  | 14-Jan-13 | XXXXXXXXXX |
| 6 | 500 | 371  | 07-Jan-13 | XXXXXXXXXX |
| 6 | 620 | 1208 | 21-Jan-13 | XXXXXXXXXX |
| 6 | 600 | 371  | 07-Jan-13 | XXXXXXXXXX |
| 6 | 600 | 1083 | 21-Jan-13 | XXXXXXXXXX |
| 6 | 570 | 990  | 17-Jan-13 | XXXXXXXXXX |
| 6 | 650 | 474  | 15-Jan-13 | XXXXXXXXXX |
| 6 | 600 | 1270 | 22-Jan-13 | XXXXXXXXXX |
| 6 | 500 | 776  | 16-Jan-13 | XXXXXXXXXX |
| 6 | 600 | 528  | 16-Jan-13 | XXXXXXXXXX |
| 6 | 600 | 629  | 17-Jan-13 | XXXXXXXXXX |
| 6 | 800 | 447  | 08-Jan-13 | XXXXXXXXXX |
| 6 | 570 | 515  | 11-Jan-13 | XXXXXXXXXX |
| 6 | 650 | 618  | 15-Jan-13 | XXXXXXXXXX |
| 6 | 600 | 473  | 09-Jan-13 | XXXXXXXXXX |
| 6 | 700 | 877  | 17-Jan-13 | XXXXXXXXXX |



|   |     |      |           |            |
|---|-----|------|-----------|------------|
| 6 | 750 | 1221 | 21-Jan-13 | XXXXXXXXXX |
| 6 | 600 | 438  | 08-Jan-13 | XXXXXXXXXX |
| 6 | 750 | 836  | 17-Jan-13 | XXXXXXXXXX |
| 6 | 750 | 684  | 21-Jan-13 | XXXXXXXXXX |
| 6 | 800 | 724  | 21-Jan-13 | XXXXXXXXXX |
| 6 | 700 | 397  | 08-Jan-13 | XXXXXXXXXX |
| 6 | 700 | 1276 | 22-Jan-13 | XXXXXXXXXX |
| 6 | 750 | 418  | 08-Jan-13 | XXXXXXXXXX |
| 6 | 850 | 787  | 22-Jan-13 | XXXXXXXXXX |
| 6 | 750 | 340  | 07-Jan-13 | XXXXXXXXXX |
| 6 | 750 | 1252 | 22-Jan-13 | XXXXXXXXXX |
| 6 | 680 | 373  | 07-Jan-13 | XXXXXXXXXX |
| 6 | 750 | 359  | 07-Jan-13 | XXXXXXXXXX |
| 6 | 800 | 1111 | 21-Jan-13 | XXXXXXXXXX |
| 6 | 680 | 1272 | 22-Jan-13 | XXXXXXXXXX |
| 6 | 780 | 736  | 16-Jan-13 | XXXXXXXXXX |
| 6 | 850 |      |           | XXXXXXXXXX |
| 6 | 750 | 418  | 14-Jan-13 | XXXXXXXXXX |
| 6 | 750 | 979  | 17-Jan-13 | XXXXXXXXXX |
| 6 | 800 | 934  | 17-Jan-13 | XXXXXXXXXX |
| 6 | 500 | 916  | 17-Jan-13 | XXXXXXXXXX |
| 6 | 750 | 472  | 15-Jan-13 | XXXXXXXXXX |
| 6 | 950 | 613  | 15-Jan-13 | XXXXXXXXXX |
| 6 | 600 | 519  | 16-Jan-13 | XXXXXXXXXX |
| 6 | 750 | 420  | 08-Jan-13 | XXXXXXXXXX |
| 6 | 800 | 536  | 09-Jan-13 | XXXXXXXXXX |
| 6 | 750 | 890  | 17-Jan-13 | XXXXXXXXXX |
| 6 | 700 | 366  | 07-Jan-13 | XXXXXXXXXX |
| 6 | 750 | 411  | 10-Jan-13 | XXXXXXXXXX |
| 6 | 650 | 902  | 17-Jan-13 | XXXXXXXXXX |
| 6 | 850 | 716  | 16-Jan-13 | XXXXXXXXXX |
| 6 | 800 | 625  | 17-Jan-13 | XXXXXXXXXX |
| 6 | 750 | 1091 | 21-Jan-13 | XXXXXXXXXX |
| 6 | 750 | 986  | 17-Jan-13 | XXXXXXXXXX |
| 6 |     | 681  | 16-Jan-13 | XXXXXXXXXX |
| 6 | 850 | 484  | 15-Jan-13 | XXXXXXXXXX |
| 6 | 800 | 740  | 21-Jan-13 | XXXXXXXXXX |
| 6 | 750 | 1264 | 22-Jan-13 | XXXXXXXXXX |
| 6 | 800 | 580  | 15-Jan-13 | XXXXXXXXXX |
| 6 | 800 | 550  | 14-Jan-13 | XXXXXXXXXX |
| 6 | 750 | 579  | 14-Jan-13 | XXXXXXXXXX |
| 6 | 200 | 467  | 14-Jan-13 | XXXXXXXXXX |
| 6 | 800 | 969  | 17-Jan-13 | XXXXXXXXXX |
| 6 | 750 | 786  | 16-Jan-13 | XXXXXXXXXX |
| 6 | 780 | 964  | 17-Jan-13 | XXXXXXXXXX |
| 6 | 250 | 604  | 17-Jan-13 | XXXXXXXXXX |
| 6 | 850 | 593  | 16-Jan-13 | XXXXXXXXXX |
| 6 | 850 | 673  | 17-Jan-13 | XXXXXXXXXX |
| 6 | 800 | 939  | 17-Jan-13 | XXXXXXXXXX |
| 6 | 800 | 579  | 17-Jan-13 | XXXXXXXXXX |

|   |     |      |           |            |
|---|-----|------|-----------|------------|
| 6 | 700 | 593  | 17-Jan-13 | XXXXXXXXXX |
| 6 | 800 | 352  | 07-Jan-13 | XXXXXXXXXX |
| 6 | 950 | 782  | 22-Jan-13 | XXXXXXXXXX |
| 6 | 800 | 406  | 08-Jan-13 | XXXXXXXXXX |
| 6 | 600 | 694  | 21-Jan-13 | XXXXXXXXXX |
| 6 | 700 | 397  | 08-Jan-13 | XXXXXXXXXX |
| 6 | 700 | 1116 | 21-Jan-13 | XXXXXXXXXX |
| 6 | 750 | 821  | 22-Jan-13 | XXXXXXXXXX |
| 6 | 850 | 500  | 15-Jan-13 | XXXXXXXXXX |
| 6 | 750 | 332  | 07-Jan-13 | XXXXXXXXXX |
| 6 | 700 | 1028 | 21-Jan-13 | XXXXXXXXXX |
| 6 | 750 | 1000 | 17-Jan-13 | XXXXXXXXXX |
| 6 | 750 | 338  | 07-Jan-13 | XXXXXXXXXX |
| 6 | 700 | 1053 | 21-Jan-13 | XXXXXXXXXX |
| 6 | 700 | 477  | 10-Jan-13 | XXXXXXXXXX |
| 6 | 750 | 354  | 07-Jan-13 | XXXXXXXXXX |
| 6 | 570 | 381  | 08-Jan-13 | XXXXXXXXXX |
| 6 | 750 | 1278 | 22-Jan-13 | XXXXXXXXXX |
| 6 | 750 | 362  | 07-Jan-13 | XXXXXXXXXX |
| 6 | 800 | 770  | 21-Jan-13 | XXXXXXXXXX |
| 6 | 750 | 527  | 11-Jan-13 | XXXXXXXXXX |
| 6 | 800 | 568  | 14-Jan-13 | XXXXXXXXXX |
| 6 | 850 | 624  | 15-Jan-13 | XXXXXXXXXX |
| 6 | 800 | 580  | 16-Jan-13 | XXXXXXXXXX |
| 6 | 800 | 529  | 09-Jan-13 | XXXXXXXXXX |
| 6 | 750 | 565  | 14-Jan-13 | XXXXXXXXXX |
| 6 | 800 | 869  | 17-Jan-13 | XXXXXXXXXX |
| 6 | 650 | 642  | 17-Jan-13 | XXXXXXXXXX |
| 6 | 750 | 619  | 15-Jan-13 | XXXXXXXXXX |
| 6 | 750 | 477  | 09-Jan-13 | XXXXXXXXXX |
| 6 | 750 | 624  | 17-Jan-13 | XXXXXXXXXX |
| 6 | 750 | 606  | 15-Jan-13 | XXXXXXXXXX |
| 6 | 700 | 502  | 09-Jan-13 | XXXXXXXXXX |
| 6 | 850 | 438  | 14-Jan-13 | XXXXXXXXXX |
| 6 | 750 | 631  | 17-Jan-13 | XXXXXXXXXX |
| 6 | 800 | 883  | 17-Jan-13 | XXXXXXXXXX |
| 6 | 700 | 471  | 09-Jan-13 | XXXXXXXXXX |
| 6 | 700 | 641  | 15-Jan-13 | XXXXXXXXXX |
| 6 | 700 | 491  | 10-Jan-13 | XXXXXXXXXX |
| 6 | 700 | 768  | 21-Jan-13 | XXXXXXXXXX |
| 6 | 700 | 1128 | 21-Jan-13 | XXXXXXXXXX |
| 6 | 800 | 1098 | 21-Jan-13 | XXXXXXXXXX |
| 6 | 700 | 739  | 16-Jan-13 | XXXXXXXXXX |
| 6 | 750 | 349  | 08-Jan-13 | XXXXXXXXXX |
| 6 | 750 | 615  | 17-Jan-13 | XXXXXXXXXX |
| 6 | 800 | 453  | 09-Jan-13 | XXXXXXXXXX |
| 6 | 750 | 568  | 14-Jan-13 | XXXXXXXXXX |
| 6 | 800 | 587  | 17-Jan-13 | XXXXXXXXXX |
| 6 | 750 | 512  | 10-Jan-13 | XXXXXXXXXX |
| 6 | 820 | 801  | 22-Jan-13 | XXXXXXXXXX |

|   |     |      |           |            |
|---|-----|------|-----------|------------|
| 6 | 800 | 1186 | 21-Jan-13 | XXXXXXXXXX |
| 6 | 800 | 688  | 21-Jan-13 | XXXXXXXXXX |
| 6 | 810 | 733  | 21-Jan-13 | XXXXXXXXXX |
| 6 | 600 | 1225 | 21-Jan-13 | XXXXXXXXXX |
| 6 | 800 | 1026 | 21-Jan-13 | XXXXXXXXXX |
| 6 | 800 | 1311 | 22-Jan-13 | XXXXXXXXXX |
| 6 | 800 | 659  | 15-Jan-13 | XXXXXXXXXX |
| 6 | 890 | 610  | 15-Jan-13 | XXXXXXXXXX |
| 6 | 750 | 562  | 14-Jan-13 | XXXXXXXXXX |
| 6 | 750 | 594  | 15-Jan-13 | XXXXXXXXXX |
| 6 | 750 | 433  | 08-Jan-13 | XXXXXXXXXX |
| 6 | 800 | 701  | 21-Jan-13 | XXXXXXXXXX |
| 6 | 750 | 479  | 10-Jan-13 | XXXXXXXXXX |
| 6 | 700 | 577  | 16-Jan-13 | XXXXXXXXXX |
| 6 | 600 | 674  | 21-Jan-13 | XXXXXXXXXX |
| 6 | 750 | 360  | 07-Jan-13 | XXXXXXXXXX |
| 6 | 800 | 1298 | 22-Jan-13 | XXXXXXXXXX |
| 6 |     |      |           | XXXXXXXXXX |
| 6 | 600 | 370  | 07-Jan-13 | XXXXXXXXXX |
| 6 | 630 | 545  | 11-Jan-13 | XXXXXXXXXX |
| 6 | 700 | 885  | 17-Jan-13 | XXXXXXXXXX |
| 6 | 780 | 617  | 17-Jan-13 | XXXXXXXXXX |
| 6 | 550 | 1154 | 21-Jan-13 | XXXXXXXXXX |
| 6 | 650 | 691  | 16-Jan-13 | XXXXXXXXXX |
| 6 | 700 | 399  | 08-Jan-13 | XXXXXXXXXX |
| 6 | 600 | 491  | 15-Jan-13 | XXXXXXXXXX |
| 6 | 650 | 463  | 10-Jan-13 | XXXXXXXXXX |
| 6 | 650 | 436  | 08-Jan-13 | XXXXXXXXXX |
| 6 | 650 | 1093 | 21-Jan-13 | XXXXXXXXXX |
| 6 | 700 | 812  | 22-Jan-13 | XXXXXXXXXX |
| 6 | 650 | 783  | 16-Jan-13 | XXXXXXXXXX |
| 6 | 700 | 853  | 17-Jan-13 | XXXXXXXXXX |
| 6 | 650 | 341  | 07-Jan-13 | XXXXXXXXXX |
| 6 | 750 | 1011 | 17-Jan-13 | XXXXXXXXXX |
| 6 | 650 | 1056 | 21-Jan-13 | XXXXXXXXXX |
| 6 | 700 | 585  | 16-Jan-13 | XXXXXXXXXX |
| 6 | 750 | 528  | 09-Jan-13 | XXXXXXXXXX |
| 6 | 700 | 503  | 09-Jan-13 | XXXXXXXXXX |
| 6 | 650 | 1127 | 21-Jan-13 | XXXXXXXXXX |
| 6 | 750 | 576  | 14-Jan-13 | XXXXXXXXXX |
| 6 | 750 | 692  | 16-Jan-13 | XXXXXXXXXX |
| 6 | 650 | 536  | 11-Jan-13 | XXXXXXXXXX |
| 6 | 690 | 662  | 21-Jan-13 | XXXXXXXXXX |
| 6 | 650 | 392  | 07-Jan-13 | XXXXXXXXXX |
| 6 | 550 | 438  | 08-Jan-13 | XXXXXXXXXX |
| 6 | 700 | 487  | 09-Jan-13 | XXXXXXXXXX |
| 6 | 450 | 530  | 11-Jan-13 | XXXXXXXXXX |
| 6 | 650 | 621  | 17-Jan-13 | XXXXXXXXXX |
| 6 | 650 | 389  | 07-Jan-13 | XXXXXXXXXX |
| 6 | 650 | 605  | 15-Jan-13 | XXXXXXXXXX |

|   |      |      |           |            |
|---|------|------|-----------|------------|
| 6 | 650  | 811  | 16-Jan-13 | XXXXXXXXXX |
| 6 | 500  | 514  | 15-Jan-13 | XXXXXXXXXX |
| 6 | 600  | 331  | 07-Jan-13 | XXXXXXXXXX |
| 6 | 650  | 796  | 16-Jan-13 | XXXXXXXXXX |
| 6 | 650  | 518  | 16-Jan-13 | XXXXXXXXXX |
| 6 | 600  | 591  | 15-Jan-13 | XXXXXXXXXX |
| 6 | 600  | 555  | 16-Jan-13 | XXXXXXXXXX |
| 6 | 600  | 433  | 08-Jan-13 | XXXXXXXXXX |
| 6 | 600  | 1243 | 22-Jan-13 | XXXXXXXXXX |
| 6 | 600  | 855  | 17-Jan-13 | XXXXXXXXXX |
| 6 | 750  | 825  | 22-Jan-13 | XXXXXXXXXX |
| 6 | 700  | 333  | 07-Jan-13 | XXXXXXXXXX |
| 6 | 600  | 810  | 16-Jan-13 | XXXXXXXXXX |
| 6 | 600  | 1049 | 21-Jan-13 | XXXXXXXXXX |
| 6 | 650  | 474  | 10-Jan-13 | XXXXXXXXXX |
| 6 | 600  | 1281 | 22-Jan-13 | XXXXXXXXXX |
| 6 | 600  | 584  | 16-Jan-13 | XXXXXXXXXX |
| 6 | 600  | 560  | 14-Jan-13 | XXXXXXXXXX |
| 6 | 600  | 639  | 17-Jan-13 | XXXXXXXXXX |
| 6 | 750  | 625  | 17-Jan-13 | XXXXXXXXXX |
| 6 | 550  | 1132 | 21-Jan-13 | XXXXXXXXXX |
| 6 | 650  | 436  | 08-Jan-13 | XXXXXXXXXX |
| 6 | 550  | 512  | 15-Jan-13 | XXXXXXXXXX |
| 6 | 600  | 918  | 17-Jan-13 | XXXXXXXXXX |
| 6 | 500  | 566  | 16-Jan-13 | XXXXXXXXXX |
| 6 | 600  | 910  | 17-Jan-13 | XXXXXXXXXX |
| 6 | 600  | 1290 | 22-Jan-13 | XXXXXXXXXX |
| 6 | 600  | 576  | 14-Jan-13 | XXXXXXXXXX |
| 6 | 800  | 974  | 17-Jan-13 | XXXXXXXXXX |
| 6 | 550  | 856  | 17-Jan-13 | XXXXXXXXXX |
| 6 | 750  | 669  | 17-Jan-13 | XXXXXXXXXX |
| 6 | 700  | 1001 | 17-Jan-13 | XXXXXXXXXX |
| 6 | 700  | 626  | 15-Jan-13 | XXXXXXXXXX |
| 6 | 500  | 601  | 15-Jan-13 | XXXXXXXXXX |
| 6 | 650  | 517  | 09-Jan-13 | XXXXXXXXXX |
| 6 | 600  | 978  | 17-Jan-13 | XXXXXXXXXX |
| 6 | 450  | 471  | 15-Jan-13 | XXXXXXXXXX |
| 6 | 700  | 415  | 08-Jan-13 | XXXXXXXXXX |
| 6 | 650  | 540  | 16-Jan-13 | XXXXXXXXXX |
| 6 | 550  | 900  | 17-Jan-13 | XXXXXXXXXX |
| 6 | 650  | 1079 | 21-Jan-13 | XXXXXXXXXX |
| 6 | 550  | 611  | 15-Jan-13 | XXXXXXXXXX |
| 6 | 450  | 594  | 17-Jan-13 | XXXXXXXXXX |
| 6 | 850  | 406  | 08-Jan-13 | XXXXXXXXXX |
| 6 | 600  | 521  | 11-Jan-13 | XXXXXXXXXX |
| 6 | 500  | 588  | 16-Jan-13 | XXXXXXXXXX |
| 6 | 1000 | 353  | 08-Jan-13 | XXXXXXXXXX |
| 6 | 500  | 1027 | 21-Jan-13 | XXXXXXXXXX |
| 6 | 550  | 466  | 14-Jan-13 | XXXXXXXXXX |
| 6 | 800  | 1108 | 21-Jan-13 | XXXXXXXXXX |

|    |      |      |           |            |
|----|------|------|-----------|------------|
| 6  | 600  | 929  | 17-Jan-13 | XXXXXXXXXX |
| 6  | 750  | 422  | 08-Jan-13 | XXXXXXXXXX |
| 6  | 600  | 590  | 15-Jan-13 | XXXXXXXXXX |
| 6  | 700  | 486  | 09-Jan-13 | XXXXXXXXXX |
| 6  | 650  | 483  | 15-Jan-13 | XXXXXXXXXX |
| 6  | 750  | 586  | 15-Jan-13 | XXXXXXXXXX |
| 6  | 750  | 670  | 17-Jan-13 | XXXXXXXXXX |
| 6  | 1000 | 822  | 22-Jan-13 | XXXXXXXXXX |
| 6  | 600  | 339  | 07-Jan-13 | XXXXXXXXXX |
| 6  | 600  | 1282 | 22-Jan-13 | XXXXXXXXXX |
| 6  | 700  | 627  | 17-Jan-13 | XXXXXXXXXX |
| 6  | 1000 | 355  | 08-Jan-13 | XXXXXXXXXX |
| 6  | 500  | 731  | 21-Jan-13 | XXXXXXXXXX |
| 12 | 350  | 772  | 21-Jan-13 | XXXXXXXXXX |
| 12 | 250  | 774  | 16-Jan-13 | XXXXXXXXXX |
| 12 | 350  | 830  | 17-Jan-13 | XXXXXXXXXX |
| 12 | 600  | 336  | 07-Jan-13 | XXXXXXXXXX |
| 12 | 300  | 679  | 21-Jan-13 | XXXXXXXXXX |
| 12 | 350  | 723  | 21-Jan-13 | XXXXXXXXXX |
| 12 | 350  | 417  | 08-Jan-13 | XXXXXXXXXX |
| 12 | 380  | 1021 | 21-Jan-13 | XXXXXXXXXX |
| 12 | 300  | 1199 | 21-Jan-13 | XXXXXXXXXX |
| 12 | 450  | 677  | 16-Jan-13 | XXXXXXXXXX |
| 12 | 300  | 1253 | 22-Jan-13 | XXXXXXXXXX |
| 12 | 400  | 1259 | 22-Jan-13 | XXXXXXXXXX |
| 12 | 300  | 711  | 21-Jan-13 | XXXXXXXXXX |
| 12 | 300  | 379  | 07-Jan-13 | XXXXXXXXXX |
| 12 | 350  | 1109 | 21-Jan-13 | XXXXXXXXXX |
| 12 | 350  | 751  | 21-Jan-13 | XXXXXXXXXX |
| 12 | 350  | 408  | 08-Jan-13 | XXXXXXXXXX |
| 12 | 350  | 338  | 07-Jan-13 | XXXXXXXXXX |
| 12 | 350  | 390  | 08-Jan-13 | XXXXXXXXXX |
| 12 | 300  | 493  | 15-Jan-13 | XXXXXXXXXX |
| 12 | 300  | 420  | 14-Jan-13 | XXXXXXXXXX |
| 12 |      | 685  | 21-Jan-13 | XXXXXXXXXX |
| 12 | 280  | 641  | 18-Jan-13 | XXXXXXXXXX |
| 12 | 350  | 534  | 09-Jan-13 | XXXXXXXXXX |
| 12 | 300  | 1328 | 22-Jan-13 | XXXXXXXXXX |
| 12 | 780  | 369  | 07-Jan-13 | XXXXXXXXXX |
| 12 | 300  | 1288 | 22-Jan-13 | XXXXXXXXXX |
| 12 | 350  | 1174 | 21-Jan-13 | XXXXXXXXXX |
| 12 | 300  | 1265 | 22-Jan-13 | XXXXXXXXXX |
| 12 | 270  | 504  | 10-Jan-13 | XXXXXXXXXX |
| 12 | 350  | 1162 | 21-Jan-13 | XXXXXXXXXX |
| 12 | 350  | 948  | 17-Jan-13 | XXXXXXXXXX |
| 12 | 300  | 1257 | 22-Jan-13 | XXXXXXXXXX |
| 12 | 350  | 1302 | 22-Jan-13 | XXXXXXXXXX |
| 12 | 350  | 354  | 07-Jan-13 | XXXXXXXXXX |
| 12 | 400  | 385  | 08-Jan-13 | XXXXXXXXXX |
| 12 | 350  | 779  | 22-Jan-13 | XXXXXXXXXX |

|    |     |      |           |            |
|----|-----|------|-----------|------------|
| 12 | 350 | 620  | 15-Jan-13 | XXXXXXXXXX |
| 12 | 300 | 693  | 21-Jan-13 | XXXXXXXXXX |
| 12 | 350 | 422  | 08-Jan-13 | XXXXXXXXXX |
| 12 | 300 | 342  | 07-Jan-13 | XXXXXXXXXX |
| 12 | 300 | 340  | 07-Jan-13 | XXXXXXXXXX |
| 12 | 300 | 401  | 08-Jan-13 | XXXXXXXXXX |
| 12 | 300 | 606  | 16-Jan-13 | XXXXXXXXXX |
| 12 | 300 | 1170 | 21-Jan-13 | XXXXXXXXXX |
| 12 | 300 | 1055 | 21-Jan-13 | XXXXXXXXXX |
| 12 | 350 | 378  | 08-Jan-13 | XXXXXXXXXX |
| 12 | 300 | 794  | 22-Jan-13 | XXXXXXXXXX |
| 12 | 300 | 525  | 09-Jan-13 | XXXXXXXXXX |
| 12 | 350 | 445  | 09-Jan-13 | XXXXXXXXXX |
| 12 | 330 | 464  | 09-Jan-13 | XXXXXXXXXX |
| 12 | 300 | 867  | 17-Jan-13 | XXXXXXXXXX |
| 12 | 300 | 509  | 09-Jan-13 | XXXXXXXXXX |
| 12 | 350 | 434  | 14-Jan-13 | XXXXXXXXXX |
| 12 | 300 | 632  | 17-Jan-13 | XXXXXXXXXX |
| 12 | 290 | 470  | 09-Jan-13 | XXXXXXXXXX |
| 12 | 400 | 661  | 15-Jan-13 | XXXXXXXXXX |
| 12 | 400 | 393  | 09-Jan-13 | XXXXXXXXXX |
| 12 | 350 | 678  | 17-Jan-13 | XXXXXXXXXX |
| 12 | 300 | 741  | 16-Jan-13 | XXXXXXXXXX |
| 12 |     |      |           | XXXXXXXXXX |
| 12 | 300 | 346  | 07-Jan-13 | XXXXXXXXXX |
| 12 | 300 | 363  | 08-Jan-13 | XXXXXXXXXX |
| 12 | 300 | 843  | 17-Jan-13 | XXXXXXXXXX |
| 12 | 300 | 463  | 09-Jan-13 | XXXXXXXXXX |
| 12 | 300 | 571  | 14-Jan-13 | XXXXXXXXXX |
| 12 | 200 | 732  | 16-Jan-13 | XXXXXXXXXX |
| 12 | 320 | 796  | 22-Jan-13 | XXXXXXXXXX |
| 12 | 350 | 1193 | 21-Jan-13 | XXXXXXXXXX |
| 12 | 330 | 736  | 21-Jan-13 | XXXXXXXXXX |
| 12 | 800 | 1220 | 21-Jan-13 | XXXXXXXXXX |
| 12 | 350 | 1318 | 22-Jan-13 | XXXXXXXXXX |
| 12 | 370 | 611  | 15-Jan-13 | XXXXXXXXXX |
| 12 | 300 | 432  | 08-Jan-13 | XXXXXXXXXX |
| 12 | 350 | 374  | 08-Jan-13 | XXXXXXXXXX |
| 12 | 300 | 1061 | 21-Jan-13 | XXXXXXXXXX |
| 12 | 300 | 579  | 16-Jan-13 | XXXXXXXXXX |
| 12 | 350 | 518  | 09-Jan-13 | XXXXXXXXXX |
| 12 | 300 | 766  | 21-Jan-13 | XXXXXXXXXX |
| 12 | 300 | 637  | 15-Jan-13 | XXXXXXXXXX |
| 12 | 360 | 654  | 18-Jan-13 | XXXXXXXXXX |
| 12 | 250 | 498  | 09-Jan-13 | XXXXXXXXXX |
| 12 | 400 | 537  | 09-Jan-13 | XXXXXXXXXX |
| 12 | 350 | 1072 | 21-Jan-13 | XXXXXXXXXX |
| 12 | 300 | 484  | 10-Jan-13 | XXXXXXXXXX |
| 12 | 300 | 825  | 17-Jan-13 | XXXXXXXXXX |
| 12 |     | 709  | 16-Jan-13 | XXXXXXXXXX |

|    |     |      |           |            |
|----|-----|------|-----------|------------|
| 16 | 250 | 567  | 16-Jan-13 | XXXXXXXXXX |
| 12 | 250 | 431  | 08-Jan-13 | XXXXXXXXXX |
| 6  | 280 | 994  | 17-Jan-13 | XXXXXXXXXX |
| 6  | 420 | 427  | 08-Jan-13 | XXXXXXXXXX |
| 6  | 650 | 1078 | 21-Jan-13 | XXXXXXXXXX |
| 3  | 250 | 350  | 07-Jan-13 | XXXXXXXXXX |
| 3  | 200 | 684  | 21-Jan-13 | XXXXXXXXXX |
| 3  | 240 | 415  | 08-Jan-13 | XXXXXXXXXX |
| 3  |     | 1139 | 21-Jan-13 | XXXXXXXXXX |
| 3  | 250 | 555  | 14-Jan-13 | XXXXXXXXXX |
| 3  | 200 | 624  | 15-Jan-13 | XXXXXXXXXX |
| 3  | 200 | 482  | 09-Jan-13 | XXXXXXXXXX |
| 3  | 150 | 746  | 21-Jan-13 | XXXXXXXXXX |
| 6  | 150 | 1262 | 22-Jan-13 | XXXXXXXXXX |
| 3  | 250 | 953  | 17-Jan-13 | XXXXXXXXXX |
| 3  | 200 | 547  | 14-Jan-13 | XXXXXXXXXX |
| 3  |     | 705  | 16-Jan-13 | XXXXXXXXXX |
| 3  |     | 818  | 22-Jan-13 | XXXXXXXXXX |
| 3  |     | 749  | 16-Jan-13 | XXXXXXXXXX |
| 3  |     | 674  | 16-Jan-13 | XXXXXXXXXX |
| 3  | 250 | 349  | 07-Jan-13 | XXXXXXXXXX |
| 3  | 300 | 998  | 17-Jan-13 | XXXXXXXXXX |
| 3  | 250 |      |           | XXXXXXXXXX |
| 3  | 150 | 793  | 22-Jan-13 | XXXXXXXXXX |
| 3  | 100 | 567  | 14-Jan-13 | XXXXXXXXXX |
| 3  | 300 | 573  | 14-Jan-13 | XXXXXXXXXX |
| 3  | 300 | 430  | 14-Jan-13 | XXXXXXXXXX |
| 3  | 150 | 816  | 17-Jan-13 | XXXXXXXXXX |
| 3  | 300 | 504  | 15-Jan-13 | XXXXXXXXXX |
| 3  | 200 | 675  | 21-Jan-13 | XXXXXXXXXX |
| 3  | 200 | 521  | 09-Jan-13 | XXXXXXXXXX |
| 24 | 500 | 581  | 15-Jan-13 | XXXXXXXXXX |
| 24 | 550 | 534  | 16-Jan-13 | XXXXXXXXXX |
| 6  | 200 | 759  | 21-Jan-13 | XXXXXXXXXX |
| 6  | 180 | 379  | 07-Jan-13 | XXXXXXXXXX |
| 6  | 150 | 1142 | 21-Jan-13 | XXXXXXXXXX |
| 6  | 150 | 1234 | 21-Jan-13 | XXXXXXXXXX |
| 6  | 250 | 1161 | 21-Jan-13 | XXXXXXXXXX |
| 6  | 100 | 377  | 07-Jan-13 | XXXXXXXXXX |
| 6  | 300 | 1020 | 17-Jan-13 | XXXXXXXXXX |
| 3  | 300 | 572  | 14-Jan-13 | XXXXXXXXXX |
| 6  | 300 | 465  | 09-Jan-13 | XXXXXXXXXX |
| 6  | 250 | 866  | 17-Jan-13 | XXXXXXXXXX |
| 6  | 150 | 650  | 17-Jan-13 | XXXXXXXXXX |
| 6  | 200 | 613  | 17-Jan-13 | XXXXXXXXXX |
| 6  | 200 | 731  | 16-Jan-13 | XXXXXXXXXX |
| 6  | 200 | 705  | 21-Jan-13 | XXXXXXXXXX |
| 12 | 180 | 385  | 08-Jan-13 | XXXXXXXXXX |
| 12 | 250 | 592  | 15-Jan-13 | XXXXXXXXXX |
| 24 | 450 | 1007 | 17-Jan-13 | XXXXXXXXXX |

|    |     |      |           |            |
|----|-----|------|-----------|------------|
| 24 | 350 | 410  | 08-Jan-13 | XXXXXXXXXX |
| 24 | 150 |      |           | XXXXXXXXXX |
| 24 | 300 | 749  | 21-Jan-13 | XXXXXXXXXX |
| 24 | 300 | 561  | 16-Jan-13 | XXXXXXXXXX |
| 24 | 300 | 626  | 15-Jan-13 | XXXXXXXXXX |
| 24 | 250 | 1143 | 21-Jan-13 | XXXXXXXXXX |
| 24 | 500 | 539  | 09-Jan-13 | XXXXXXXXXX |
| 24 | 600 | 685  | 16-Jan-13 | XXXXXXXXXX |
| 24 | 300 | 600  | 17-Jan-13 | XXXXXXXXXX |
| 24 | 300 | 692  | 21-Jan-13 | XXXXXXXXXX |
| 24 | 350 | 460  | 08-Jan-13 | XXXXXXXXXX |
| 6  | 400 | 478  | 15-Jan-13 | XXXXXXXXXX |
| 6  |     | 684  | 16-Jan-13 | XXXXXXXXXX |
| 6  |     | 754  | 16-Jan-13 | XXXXXXXXXX |
| 24 | 300 | 564  | 14-Jan-13 | XXXXXXXXXX |
| 6  | 350 | 369  | 07-Jan-13 | XXXXXXXXXX |
| 6  | 250 | 532  | 16-Jan-13 | XXXXXXXXXX |
| 6  | 300 | 578  | 16-Jan-13 | XXXXXXXXXX |
| 6  | 180 | 556  | 11-Jan-13 | XXXXXXXXXX |
| 6  | 200 | 773  | 16-Jan-13 | XXXXXXXXXX |
| 6  | 200 |      |           | XXXXXXXXXX |
| 6  | 200 | 785  | 16-Jan-13 | XXXXXXXXXX |
| 6  | 250 | 495  | 10-Jan-13 | XXXXXXXXXX |
| 3  |     |      |           | XXXXXXXXXX |
| 3  |     | 1140 | 21-Jan-13 | XXXXXXXXXX |
| 3  | 250 | 1327 | 22-Jan-13 | XXXXXXXXXX |
| 3  | 100 | 1289 | 22-Jan-13 | XXXXXXXXXX |
| 3  |     | 680  | 16-Jan-13 | XXXXXXXXXX |
| 3  | 150 | 745  | 21-Jan-13 | XXXXXXXXXX |
| 3  | 150 | 1261 | 22-Jan-13 | XXXXXXXXXX |
| 3  | 250 | 956  | 17-Jan-13 | XXXXXXXXXX |
| 3  | 200 | 546  | 14-Jan-13 | XXXXXXXXXX |
| 3  |     | 748  | 16-Jan-13 | XXXXXXXXXX |
| 3  | 300 | 997  | 17-Jan-13 | XXXXXXXXXX |
| 3  | 150 | 792  | 22-Jan-13 | XXXXXXXXXX |
| 3  | 300 | 429  | 14-Jan-13 | XXXXXXXXXX |
| 3  | 150 | 815  | 17-Jan-13 | XXXXXXXXXX |
| 3  | 300 | 1096 | 21-Jan-13 | XXXXXXXXXX |
| 3  | 250 | 618  | 16-Jan-13 | XXXXXXXXXX |
| 3  | 200 | 589  | 17-Jan-13 | XXXXXXXXXX |
| 3  | 200 |      |           | XXXXXXXXXX |
| 6  | 400 | 413  | 08-Jan-13 | XXXXXXXXXX |
| 6  |     |      |           | XXXXXXXXXX |
| 6  | 450 | 412  | 08-Jan-13 | XXXXXXXXXX |
| 6  | 300 | 1134 | 21-Jan-13 | XXXXXXXXXX |
| 6  |     |      |           | XXXXXXXXXX |
| 6  | 300 | 599  | 15-Jan-13 | XXXXXXXXXX |
| 6  | 300 | 566  | 14-Jan-13 | XXXXXXXXXX |
| 6  | 300 | 520  | 16-Jan-13 | XXXXXXXXXX |
| 6  |     | 720  | 16-Jan-13 | XXXXXXXXXX |



|    |     |      |           |            |
|----|-----|------|-----------|------------|
| 6  | 350 | 494  | 09-Jan-13 | XXXXXXXXXX |
| 6  | 300 | 1149 | 21-Jan-13 | XXXXXXXXXX |
| 6  | 300 | 927  | 17-Jan-13 | XXXXXXXXXX |
| 6  | 280 | 378  | 07-Jan-13 | XXXXXXXXXX |
| 6  |     | 702  | 16-Jan-13 | XXXXXXXXXX |
| 6  | 300 | 547  | 11-Jan-13 | XXXXXXXXXX |
| 6  | 200 | 747  | 21-Jan-13 | XXXXXXXXXX |
| 6  | 450 | 593  | 15-Jan-13 | XXXXXXXXXX |
| 6  | 450 | 578  | 14-Jan-13 | XXXXXXXXXX |
| 6  | 550 | 533  | 16-Jan-13 | XXXXXXXXXX |
| 6  | 350 | 485  | 10-Jan-13 | XXXXXXXXXX |
| 6  |     | 704  | 16-Jan-13 | XXXXXXXXXX |
| 6  |     | 819  | 22-Jan-13 | XXXXXXXXXX |
| 6  | 500 | 655  | 18-Jan-13 | XXXXXXXXXX |
| 6  | 300 | 595  | 17-Jan-13 | XXXXXXXXXX |
| 6  | 250 | 601  | 16-Jan-13 | XXXXXXXXXX |
| 6  |     | 747  | 16-Jan-13 | XXXXXXXXXX |
| 6  | 500 | 426  | 08-Jan-13 | XXXXXXXXXX |
| 6  | 450 | 412  | 08-Jan-13 | XXXXXXXXXX |
| 6  | 500 | 348  | 07-Jan-13 | XXXXXXXXXX |
| 6  | 400 | 1115 | 21-Jan-13 | XXXXXXXXXX |
| 6  | 350 | 1035 | 21-Jan-13 | XXXXXXXXXX |
| 6  | 400 | 996  | 17-Jan-13 | XXXXXXXXXX |
| 6  | 200 | 699  | 21-Jan-13 | XXXXXXXXXX |
| 6  |     |      |           | XXXXXXXXXX |
| 6  | 200 | 365  | 07-Jan-13 | XXXXXXXXXX |
| 6  | 400 | 646  | 17-Jan-13 | XXXXXXXXXX |
| 6  | 300 | 467  | 09-Jan-13 | XXXXXXXXXX |
| 6  | 350 | 806  | 16-Jan-13 | XXXXXXXXXX |
| 6  | 500 | 433  | 14-Jan-13 | XXXXXXXXXX |
| 6  | 300 | 820  | 17-Jan-13 | XXXXXXXXXX |
| 6  | 300 | 642  | 15-Jan-13 | XXXXXXXXXX |
| 6  | 400 | 1095 | 21-Jan-13 | XXXXXXXXXX |
| 6  | 150 | 368  | 08-Jan-13 | XXXXXXXXXX |
| 6  | 200 | 611  | 17-Jan-13 | XXXXXXXXXX |
| 6  | 400 | 1187 | 21-Jan-13 | XXXXXXXXXX |
| 6  | 300 | 1222 | 21-Jan-13 | XXXXXXXXXX |
| 6  | 300 | 600  | 15-Jan-13 | XXXXXXXXXX |
| 6  | 400 | 508  | 15-Jan-13 | XXXXXXXXXX |
| 6  | 350 | 414  | 08-Jan-13 | XXXXXXXXXX |
| 6  | 300 | 413  | 08-Jan-13 | XXXXXXXXXX |
| 6  | 400 | 1325 | 22-Jan-13 | XXXXXXXXXX |
| 6  | 400 | 514  | 09-Jan-13 | XXXXXXXXXX |
| 6  | 350 | 522  | 09-Jan-13 | XXXXXXXXXX |
| 12 | 500 | 640  | 18-Jan-13 | XXXXXXXXXX |
| 12 |     | 516  | 09-Jan-13 | XXXXXXXXXX |
| 6  | 350 | 543  | 16-Jan-13 | XXXXXXXXXX |
| 6  | 350 | 1240 | 22-Jan-13 | XXXXXXXXXX |
| 6  | 350 | 497  | 15-Jan-13 | XXXXXXXXXX |
| 6  | 300 | 612  | 16-Jan-13 | XXXXXXXXXX |

|    |     |      |           |            |
|----|-----|------|-----------|------------|
| 6  | 300 | 418  | 08-Jan-13 | XXXXXXXXXX |
| 6  | 350 | 646  | 18-Jan-13 | XXXXXXXXXX |
| 6  | 380 | 1231 | 21-Jan-13 | XXXXXXXXXX |
| 6  | 350 |      |           | XXXXXXXXXX |
| 6  | 550 | 911  | 17-Jan-13 | XXXXXXXXXX |
| 6  | 350 | 954  | 17-Jan-13 | XXXXXXXXXX |
| 6  | 300 | 782  | 16-Jan-13 | XXXXXXXXXX |
| 6  | 390 | 501  | 15-Jan-13 | XXXXXXXXXX |
| 6  | 400 | 566  | 14-Jan-13 | XXXXXXXXXX |
| 6  | 350 | 803  | 16-Jan-13 | XXXXXXXXXX |
| 6  | 400 | 432  | 14-Jan-13 | XXXXXXXXXX |
| 6  | 500 | 1102 | 21-Jan-13 | XXXXXXXXXX |
| 6  | 350 | 365  | 08-Jan-13 | XXXXXXXXXX |
| 6  | 450 | 840  | 17-Jan-13 | XXXXXXXXXX |
| 6  | 450 | 645  | 15-Jan-13 | XXXXXXXXXX |
| 6  | 500 | 668  | 15-Jan-13 | XXXXXXXXXX |
| 6  | 400 | 598  | 15-Jan-13 | XXXXXXXXXX |
| 6  | 450 | 442  | 08-Jan-13 | XXXXXXXXXX |
| 6  | 400 | 509  | 15-Jan-13 | XXXXXXXXXX |
| 6  | 400 | 540  | 11-Jan-13 | XXXXXXXXXX |
| 6  | 400 | 362  | 07-Jan-13 | XXXXXXXXXX |
| 12 | 600 | 683  | 21-Jan-13 | XXXXXXXXXX |
| 12 | 800 | 726  | 21-Jan-13 | XXXXXXXXXX |
| 12 | 450 | 547  | 16-Jan-13 | XXXXXXXXXX |
| 12 | 450 | 977  | 17-Jan-13 | XXXXXXXXXX |
| 12 | 550 | 611  | 16-Jan-13 | XXXXXXXXXX |
| 12 | 600 | 601  | 15-Jan-13 | XXXXXXXXXX |
| 12 | 550 | 567  | 14-Jan-13 | XXXXXXXXXX |
| 12 | 500 | 915  | 17-Jan-13 | XXXXXXXXXX |
| 12 | 500 |      |           | XXXXXXXXXX |
| 12 | 600 | 608  | 15-Jan-13 | XXXXXXXXXX |
| 12 | 550 | 632  | 17-Jan-13 | XXXXXXXXXX |
| 12 | 650 |      |           | XXXXXXXXXX |
| 12 | 580 | 502  | 15-Jan-13 | XXXXXXXXXX |
| 12 | 100 | 1284 | 22-Jan-13 | XXXXXXXXXX |
| 12 |     | 563  | 14-Jan-13 | XXXXXXXXXX |
| 12 | 500 | 408  | 10-Jan-13 | XXXXXXXXXX |
| 12 | 500 | 643  | 15-Jan-13 | XXXXXXXXXX |
| 12 | 700 |      |           | XXXXXXXXXX |
| 12 | 600 | 658  | 15-Jan-13 | XXXXXXXXXX |
| 12 | 500 | 439  | 08-Jan-13 | XXXXXXXXXX |
| 12 | 600 | 575  | 16-Jan-13 | XXXXXXXXXX |
| 12 | 600 | 1293 | 22-Jan-13 | XXXXXXXXXX |
| 12 | 450 | 1019 | 17-Jan-13 | XXXXXXXXXX |
| 12 | 550 | 538  | 16-Jan-13 | XXXXXXXXXX |
| 12 | 500 | 628  | 15-Jan-13 | XXXXXXXXXX |
| 12 | 350 | 459  | 08-Jan-13 | XXXXXXXXXX |
| 6  |     | 755  | 16-Jan-13 | XXXXXXXXXX |
| 6  | 650 | 414  | 10-Jan-13 | XXXXXXXXXX |
| 6  | 550 | 636  | 15-Jan-13 | XXXXXXXXXX |

|   |      |      |           |            |
|---|------|------|-----------|------------|
| 6 | 600  | 1004 | 17-Jan-13 | XXXXXXXXXX |
| 6 | 250  | 417  | 08-Jan-13 | XXXXXXXXXX |
| 6 | 300  | 342  | 07-Jan-13 | XXXXXXXXXX |
| 6 | 350  | 1239 | 22-Jan-13 | XXXXXXXXXX |
| 6 | 300  | 495  | 15-Jan-13 | XXXXXXXXXX |
| 6 | 500  | 501  | 10-Jan-13 | XXXXXXXXXX |
| 6 | 300  | 789  | 16-Jan-13 | XXXXXXXXXX |
| 6 | 400  | 431  | 14-Jan-13 | XXXXXXXXXX |
| 6 | 280  | 352  | 08-Jan-13 | XXXXXXXXXX |
| 6 | 300  | 648  | 15-Jan-13 | XXXXXXXXXX |
| 6 | 300  | 599  | 15-Jan-13 | XXXXXXXXXX |
| 6 | 350  | 361  | 07-Jan-13 | XXXXXXXXXX |
| 6 | 300  | 494  | 15-Jan-13 | XXXXXXXXXX |
| 6 | 300  | 888  | 17-Jan-13 | XXXXXXXXXX |
| 6 | 270  | 409  | 10-Jan-13 | XXXXXXXXXX |
| 6 | 250  | 628  | 15-Jan-13 | XXXXXXXXXX |
| 6 | 270  | 546  | 11-Jan-13 | XXXXXXXXXX |
| 6 | 600  | 400  | 09-Jan-13 | XXXXXXXXXX |
| 6 | 350  | 460  | 14-Jan-13 | XXXXXXXXXX |
| 6 | 500  | 502  | 10-Jan-13 | XXXXXXXXXX |
| 6 | 350  | 549  | 14-Jan-13 | XXXXXXXXXX |
| 6 | 250  | 951  | 17-Jan-13 | XXXXXXXXXX |
| 6 | 300  | 781  | 16-Jan-13 | XXXXXXXXXX |
| 6 | 300  | 341  | 07-Jan-13 | XXXXXXXXXX |
| 6 | 200  | 1032 | 21-Jan-13 | XXXXXXXXXX |
| 6 | 300  | 878  | 17-Jan-13 | XXXXXXXXXX |
| 6 | 250  | 630  | 17-Jan-13 | XXXXXXXXXX |
| 6 | 250  | 367  | 08-Jan-13 | XXXXXXXXXX |
| 6 | 300  | 839  | 17-Jan-13 | XXXXXXXXXX |
| 6 | 300  | 573  | 14-Jan-13 | XXXXXXXXXX |
| 6 | 300  | 510  | 10-Jan-13 | XXXXXXXXXX |
| 6 | 390  | 802  | 22-Jan-13 | XXXXXXXXXX |
| 6 | 270  | 1059 | 21-Jan-13 | XXXXXXXXXX |
| 6 | 270  | 395  | 08-Jan-13 | XXXXXXXXXX |
| 6 | 300  | 361  | 07-Jan-13 | XXXXXXXXXX |
| 6 | 300  | 1294 | 22-Jan-13 | XXXXXXXXXX |
| 6 | 900  | 719  | 21-Jan-13 | XXXXXXXXXX |
| 6 | 700  | 1009 | 17-Jan-13 | XXXXXXXXXX |
| 6 | 650  | 557  | 16-Jan-13 | XXXXXXXXXX |
| 6 | 650  | 903  | 17-Jan-13 | XXXXXXXXXX |
| 6 |      | 395  | 09-Jan-13 | XXXXXXXXXX |
| 6 | 850  | 552  | 14-Jan-13 | XXXXXXXXXX |
| 6 | 750  | 558  | 14-Jan-13 | XXXXXXXXXX |
| 6 | 1000 | 636  | 17-Jan-13 | XXXXXXXXXX |
| 6 | 690  | 434  | 08-Jan-13 | XXXXXXXXXX |
| 6 | 750  | 707  | 21-Jan-13 | XXXXXXXXXX |
| 6 | 650  | 914  | 17-Jan-13 | XXXXXXXXXX |
| 6 | 650  | 623  | 17-Jan-13 | XXXXXXXXXX |
| 6 | 1100 | 722  | 21-Jan-13 | XXXXXXXXXX |
| 6 | 950  | 1005 | 17-Jan-13 | XXXXXXXXXX |

|   |      |      |           |            |
|---|------|------|-----------|------------|
| 6 | 1000 | 546  | 16-Jan-13 | XXXXXXXXXX |
| 6 | 950  | 496  | 15-Jan-13 | XXXXXXXXXX |
| 6 | 950  | 470  | 15-Jan-13 | XXXXXXXXXX |
| 6 | 900  | 623  | 15-Jan-13 | XXXXXXXXXX |
| 6 | 950  | 1088 | 21-Jan-13 | XXXXXXXXXX |
| 6 | 1000 | 1267 | 22-Jan-13 | XXXXXXXXXX |
| 6 | 960  | 962  | 17-Jan-13 | XXXXXXXXXX |
| 6 | 1000 | 543  | 14-Jan-13 | XXXXXXXXXX |
| 6 | 980  | 665  | 17-Jan-13 | XXXXXXXXXX |
| 6 | 1500 | 820  | 22-Jan-13 | XXXXXXXXXX |
| 6 | 950  | 1050 | 21-Jan-13 | XXXXXXXXXX |
| 6 | 1000 | 583  | 16-Jan-13 | XXXXXXXXXX |
| 6 | 1000 | 557  | 14-Jan-13 | XXXXXXXXXX |
| 6 | 950  | 870  | 17-Jan-13 | XXXXXXXXXX |
| 6 | 1000 | 637  | 17-Jan-13 | XXXXXXXXXX |
| 6 | 900  | 807  | 16-Jan-13 | XXXXXXXXXX |
| 6 | 900  | 496  | 10-Jan-13 | XXXXXXXXXX |
| 6 | 1000 | 1129 | 21-Jan-13 | XXXXXXXXXX |
| 6 | 1040 | 1100 | 21-Jan-13 | XXXXXXXXXX |
| 6 | 500  | 1166 | 21-Jan-13 | XXXXXXXXXX |
| 6 | 1000 | 847  | 17-Jan-13 | XXXXXXXXXX |
| 6 | 1000 | 1151 | 21-Jan-13 | XXXXXXXXXX |
| 6 | 1080 | 795  | 22-Jan-13 | XXXXXXXXXX |
| 6 | 1000 | 738  | 21-Jan-13 | XXXXXXXXXX |
| 6 | 950  | 1218 | 21-Jan-13 | XXXXXXXXXX |
| 6 | 1000 | 649  | 15-Jan-13 | XXXXXXXXXX |
| 6 | 1050 | 666  | 15-Jan-13 | XXXXXXXXXX |
| 6 | 1040 | 612  | 15-Jan-13 | XXXXXXXXXX |
| 6 | 950  | 450  | 14-Jan-13 | XXXXXXXXXX |
| 6 | 980  | 690  | 16-Jan-13 | XXXXXXXXXX |
| 6 | 900  | 576  | 16-Jan-13 | XXXXXXXXXX |
| 6 | 950  | 1300 | 22-Jan-13 | XXXXXXXXXX |
| 6 | 580  | 555  | 11-Jan-13 | XXXXXXXXXX |
| 4 | 200  | 559  | 14-Jan-13 | XXXXXXXXXX |
| 9 | 350  | 675  | 16-Jan-13 | XXXXXXXXXX |
| 6 | 380  | 421  | 08-Jan-13 | XXXXXXXXXX |
| 9 | 500  | 642  | 18-Jan-13 | XXXXXXXXXX |
| 9 | 400  | 1323 | 22-Jan-13 | XXXXXXXXXX |
| 9 | 550  | 1092 | 21-Jan-13 | XXXXXXXXXX |
| 9 | 500  | 347  | 07-Jan-13 | XXXXXXXXXX |
| 6 | 660  | 530  | 16-Jan-13 | XXXXXXXXXX |
| 6 | 550  | 1153 | 21-Jan-13 | XXXXXXXXXX |
| 6 | 500  | 583  | 15-Jan-13 | XXXXXXXXXX |
| 6 | 550  | 526  | 16-Jan-13 | XXXXXXXXXX |
| 3 | 500  | 632  | 15-Jan-13 | XXXXXXXXXX |
| 3 | 600  |      | 20-Sep-13 | XXXXXXXXXX |
| 3 | 600  | 396  | 09-Jan-13 | XXXXXXXXXX |
| 3 | 650  | 1268 | 22-Jan-13 | XXXXXXXXXX |
| 3 | 520  | 614  | 15-Jan-13 | XXXXXXXXXX |
| 3 | 450  |      | 20-Sep-13 | XXXXXXXXXX |

|    |     |      |           |            |
|----|-----|------|-----------|------------|
| 3  | 650 | 561  | 14-Jan-13 | XXXXXXXXXX |
| 3  | 650 | 803  | 22-Jan-13 | XXXXXXXXXX |
| 3  | 650 | 1317 | 22-Jan-13 | XXXXXXXXXX |
| 12 | 300 | 999  | 17-Jan-13 | XXXXXXXXXX |
| 3  | 720 |      | 20-Sep-13 | XXXXXXXXXX |
| 3  | 800 | 788  | 22-Jan-13 | XXXXXXXXXX |
| 3  | 700 | 493  | 09-Jan-13 | XXXXXXXXXX |
| 3  | 700 | 562  | 16-Jan-13 | XXXXXXXXXX |
| 3  | 850 | 455  | 14-Jan-13 | XXXXXXXXXX |
| 3  | 850 | 1266 | 22-Jan-13 | XXXXXXXXXX |
| 3  | 780 | 612  | 15-Jan-13 | XXXXXXXXXX |
| 3  | 850 | 671  | 17-Jan-13 | XXXXXXXXXX |
| 3  | 850 | 523  | 09-Jan-13 | XXXXXXXXXX |
| 3  | 600 | 562  | 14-Jan-13 | XXXXXXXXXX |
| 3  | 700 | 808  | 16-Jan-13 | XXXXXXXXXX |
| 3  | 800 | 920  | 17-Jan-13 | XXXXXXXXXX |
| 3  | 720 | 841  | 17-Jan-13 | XXXXXXXXXX |
| 3  | 950 | 1315 | 22-Jan-13 | XXXXXXXXXX |
| 3  | 800 | 657  | 15-Jan-13 | XXXXXXXXXX |
| 3  | 850 | 665  | 15-Jan-13 | XXXXXXXXXX |
| 3  | 650 | 694  | 16-Jan-13 | XXXXXXXXXX |
| 3  | 480 | 1067 | 21-Jan-13 | XXXXXXXXXX |
| 3  | 750 | 1304 | 22-Jan-13 | XXXXXXXXXX |
| 8  | 400 | 390  | 07-Jan-13 | XXXXXXXXXX |
| 8  | 380 | 565  | 16-Jan-13 | XXXXXXXXXX |
| 8  | 500 | 893  | 17-Jan-13 | XXXXXXXXXX |
| 8  | 400 | 602  | 17-Jan-13 | XXXXXXXXXX |
| 8  | 850 | 449  | 08-Jan-13 | XXXXXXXXXX |
| 8  | 500 | 428  | 14-Jan-13 | XXXXXXXXXX |
| 8  | 400 | 357  | 08-Jan-13 | XXXXXXXXXX |
| 8  | 450 | 618  | 17-Jan-13 | XXXXXXXXXX |
| 8  | 450 | 460  | 09-Jan-13 | XXXXXXXXXX |
| 8  | 480 | 428  | 08-Jan-13 | XXXXXXXXXX |
| 8  | 500 | 589  | 15-Jan-13 | XXXXXXXXXX |
| 8  | 550 | 454  | 14-Jan-13 | XXXXXXXXXX |
| 8  | 400 | 653  | 17-Jan-13 | XXXXXXXXXX |
| 12 | 350 | 758  | 21-Jan-13 | XXXXXXXXXX |
| 12 | 450 | 648  | 18-Jan-13 | XXXXXXXXXX |
| 12 | 450 | 634  | 15-Jan-13 | XXXXXXXXXX |
| 12 | 300 | 332  | 07-Jan-13 | XXXXXXXXXX |
| 12 | 300 | 682  | 21-Jan-13 | XXXXXXXXXX |
| 12 | 350 | 725  | 21-Jan-13 | XXXXXXXXXX |
| 12 | 350 | 1275 | 22-Jan-13 | XXXXXXXXXX |
| 12 | 350 | 785  | 22-Jan-13 | XXXXXXXXXX |
| 12 | 300 | 676  | 16-Jan-13 | XXXXXXXXXX |
| 12 | 300 | 1251 | 22-Jan-13 | XXXXXXXXXX |
| 12 | 350 | 1260 | 22-Jan-13 | XXXXXXXXXX |
| 12 | 350 |      | 21-Jan-13 | XXXXXXXXXX |
| 12 | 300 | 360  | 07-Jan-13 | XXXXXXXXXX |
| 12 | 300 | 380  | 07-Jan-13 | XXXXXXXXXX |

|    |     |      |           |            |
|----|-----|------|-----------|------------|
| 12 | 300 | 1110 | 21-Jan-13 | XXXXXXXXXX |
| 12 | 350 | 737  | 16-Jan-13 | XXXXXXXXXX |
| 12 | 300 |      |           | XXXXXXXXXX |
| 12 |     | 1136 | 21-Jan-13 | XXXXXXXXXX |
| 12 | 350 | 750  | 21-Jan-13 | XXXXXXXXXX |
| 12 | 350 | 407  | 08-Jan-13 | XXXXXXXXXX |
| 12 | 350 | 336  | 07-Jan-13 | XXXXXXXXXX |
| 12 | 450 | 391  | 08-Jan-13 | XXXXXXXXXX |
| 12 | 300 | 490  | 15-Jan-13 | XXXXXXXXXX |
| 12 | 350 | 935  | 17-Jan-13 | XXXXXXXXXX |
| 12 | 300 | 794  | 16-Jan-13 | XXXXXXXXXX |
| 12 | 300 | 613  | 16-Jan-13 | XXXXXXXXXX |
| 12 | 300 | 616  | 15-Jan-13 | XXXXXXXXXX |
| 12 | 300 | 600  | 15-Jan-13 | XXXXXXXXXX |
| 12 | 350 | 686  | 21-Jan-13 | XXXXXXXXXX |
| 12 | 300 | 637  | 17-Jan-13 | XXXXXXXXXX |
| 12 | 300 | 414  | 08-Jan-13 | XXXXXXXXXX |
| 12 | 300 | 496  | 09-Jan-13 | XXXXXXXXXX |
| 12 | 400 | 690  | 21-Jan-13 | XXXXXXXXXX |
| 12 | 300 | 539  | 16-Jan-13 | XXXXXXXXXX |
| 12 | 280 | 647  | 18-Jan-13 | XXXXXXXXXX |
| 12 | 300 | 531  | 09-Jan-13 | XXXXXXXXXX |
| 12 | 300 | 1326 | 22-Jan-13 | XXXXXXXXXX |
| 12 | 300 | 887  | 17-Jan-13 | XXXXXXXXXX |
| 12 | 300 | 926  | 17-Jan-13 | XXXXXXXXXX |
| 12 | 300 | 464  | 10-Jan-13 | XXXXXXXXXX |
| 12 | 280 | 384  | 07-Jan-13 | XXXXXXXXXX |
| 12 | 280 | 631  | 15-Jan-13 | XXXXXXXXXX |
| 12 | 300 | 552  | 11-Jan-13 | XXXXXXXXXX |
| 12 | 280 | 904  | 17-Jan-13 | XXXXXXXXXX |
| 12 | 300 | 726  | 16-Jan-13 | XXXXXXXXXX |
| 12 | 300 | 1148 | 21-Jan-13 | XXXXXXXXXX |
| 12 | 350 | 772  | 16-Jan-13 | XXXXXXXXXX |
| 12 | 400 | 525  | 16-Jan-13 | XXXXXXXXXX |
| 12 | 280 | 479  | 09-Jan-13 | XXXXXXXXXX |
| 12 | 400 | 542  | 09-Jan-13 | XXXXXXXXXX |
| 12 | 350 | 714  | 16-Jan-13 | XXXXXXXXXX |
| 12 | 300 | 1236 | 21-Jan-13 | XXXXXXXXXX |
| 12 | 300 | 626  | 17-Jan-13 | XXXXXXXXXX |
| 12 | 300 | 993  | 17-Jan-13 | XXXXXXXXXX |
| 12 | 350 | 686  | 16-Jan-13 | XXXXXXXXXX |
| 12 | 350 | 456  | 14-Jan-13 | XXXXXXXXXX |
| 12 | 350 | 481  | 15-Jan-13 | XXXXXXXXXX |
| 12 | 300 | 739  | 21-Jan-13 | XXXXXXXXXX |
| 12 | 400 | 503  | 10-Jan-13 | XXXXXXXXXX |
| 12 | 350 | 1159 | 21-Jan-13 | XXXXXXXXXX |
| 12 | 350 | 1071 | 21-Jan-13 | XXXXXXXXXX |
| 12 | 350 | 579  | 15-Jan-13 | XXXXXXXXXX |
| 12 | 350 | 952  | 17-Jan-13 | XXXXXXXXXX |
| 12 | 350 | 580  | 14-Jan-13 | XXXXXXXXXX |

|    |     |      |           |            |
|----|-----|------|-----------|------------|
| 12 | 300 | 777  | 16-Jan-13 | XXXXXXXXXX |
| 12 | 350 | 527  | 16-Jan-13 | XXXXXXXXXX |
| 12 | 300 | 605  | 17-Jan-13 | XXXXXXXXXX |
| 12 | 340 | 596  | 16-Jan-13 | XXXXXXXXXX |
| 12 | 350 | 666  | 17-Jan-13 | XXXXXXXXXX |
| 12 | 350 | 337  | 07-Jan-13 | XXXXXXXXXX |
| 12 | 400 | 938  | 17-Jan-13 | XXXXXXXXXX |
| 12 | 350 | 586  | 17-Jan-13 | XXXXXXXXXX |
| 12 | 400 | 657  | 18-Jan-13 | XXXXXXXXXX |
| 12 | 300 | 592  | 17-Jan-13 | XXXXXXXXXX |
| 12 | 350 | 610  | 16-Jan-13 | XXXXXXXXXX |
| 12 | 300 | 603  | 16-Jan-13 | XXXXXXXXXX |
| 12 | 385 | 446  | 08-Jan-13 | XXXXXXXXXX |
| 12 | 400 | 384  | 08-Jan-13 | XXXXXXXXXX |
| 12 | 300 | 1058 | 21-Jan-13 | XXXXXXXXXX |
| 12 | 300 | 456  | 08-Jan-13 | XXXXXXXXXX |
| 12 | 300 | 699  | 21-Jan-13 | XXXXXXXXXX |
| 12 | 300 | 1113 | 21-Jan-13 | XXXXXXXXXX |
| 12 | 300 | 503  | 15-Jan-13 | XXXXXXXXXX |
| 12 | 300 | 1036 | 21-Jan-13 | XXXXXXXXXX |
| 12 | 300 | 813  | 16-Jan-13 | XXXXXXXXXX |
| 12 | 300 |      |           | XXXXXXXXXX |
| 12 | 300 | 1171 | 21-Jan-13 | XXXXXXXXXX |
| 12 | 300 | 1052 | 21-Jan-13 | XXXXXXXXXX |
| 12 | 300 | 475  | 10-Jan-13 | XXXXXXXXXX |
| 12 | 300 | 356  | 07-Jan-13 | XXXXXXXXXX |
| 12 | 300 | 756  | 21-Jan-13 | XXXXXXXXXX |
| 12 | 300 | 771  | 21-Jan-13 | XXXXXXXXXX |
| 12 | 300 | 526  | 11-Jan-13 | XXXXXXXXXX |
| 12 | 350 | 622  | 15-Jan-13 | XXXXXXXXXX |
| 12 | 350 | 876  | 17-Jan-13 | XXXXXXXXXX |
| 12 | 300 | 641  | 17-Jan-13 | XXXXXXXXXX |
| 12 | 380 | 647  | 17-Jan-13 | XXXXXXXXXX |
| 12 | 380 | 622  | 15-Jan-13 | XXXXXXXXXX |
| 12 | 300 | 661  | 17-Jan-13 | XXXXXXXXXX |
| 12 | 450 | 446  | 09-Jan-13 | XXXXXXXXXX |
| 12 |     |      |           | XXXXXXXXXX |
| 12 | 300 | 472  | 09-Jan-13 | XXXXXXXXXX |
| 12 | 300 | 626  | 17-Jan-13 | XXXXXXXXXX |
| 12 | 350 | 864  | 17-Jan-13 | XXXXXXXXXX |
| 12 | 300 | 802  | 16-Jan-13 | XXXXXXXXXX |
| 12 | 300 | 504  | 09-Jan-13 | XXXXXXXXXX |
| 12 | 350 | 436  | 14-Jan-13 | XXXXXXXXXX |
| 12 | 450 | 404  | 10-Jan-13 | XXXXXXXXXX |
| 12 | 300 | 824  | 17-Jan-13 | XXXXXXXXXX |
| 12 | 300 | 648  | 17-Jan-13 | XXXXXXXXXX |
| 12 | 300 | 468  | 09-Jan-13 | XXXXXXXXXX |
| 12 | 350 | 921  | 17-Jan-13 | XXXXXXXXXX |
| 12 | 300 | 639  | 15-Jan-13 | XXXXXXXXXX |
| 12 | 300 | 490  | 10-Jan-13 | XXXXXXXXXX |

|    |     |      |           |            |
|----|-----|------|-----------|------------|
| 12 | 300 | 767  | 21-Jan-13 | XXXXXXXXXX |
| 12 | 400 | 386  | 08-Jan-13 | XXXXXXXXXX |
| 12 | 300 | 1133 | 21-Jan-13 | XXXXXXXXXX |
| 12 | 300 | 1101 | 21-Jan-13 | XXXXXXXXXX |
| 12 | 350 | 676  | 17-Jan-13 | XXXXXXXXXX |
| 12 | 300 | 740  | 16-Jan-13 | XXXXXXXXXX |
| 12 | 300 | 345  | 07-Jan-13 | XXXXXXXXXX |
| 12 | 300 | 359  | 08-Jan-13 | XXXXXXXXXX |
| 12 | 500 | 712  | 21-Jan-13 | XXXXXXXXXX |
| 12 | 350 | 372  | 08-Jan-13 | XXXXXXXXXX |
| 12 | 400 | 1167 | 21-Jan-13 | XXXXXXXXXX |
| 12 | 350 | 461  | 09-Jan-13 | XXXXXXXXXX |
| 12 | 300 | 572  | 14-Jan-13 | XXXXXXXXXX |
| 12 | 350 | 457  | 08-Jan-13 | XXXXXXXXXX |
| 12 | 350 | 511  | 10-Jan-13 | XXXXXXXXXX |
| 12 | 300 | 734  | 16-Jan-13 | XXXXXXXXXX |
| 12 | 500 | 354  | 08-Jan-13 | XXXXXXXXXX |
| 12 | 320 | 799  | 22-Jan-13 | XXXXXXXXXX |
| 12 | 350 | 1191 | 21-Jan-13 | XXXXXXXXXX |
| 12 | 350 | 686  | 21-Jan-13 | XXXXXXXXXX |
| 12 | 330 | 729  | 21-Jan-13 | XXXXXXXXXX |
| 12 | 800 | 1223 | 21-Jan-13 | XXXXXXXXXX |
| 12 | 350 | 656  | 15-Jan-13 | XXXXXXXXXX |
| 12 | 350 | 609  | 15-Jan-13 | XXXXXXXXXX |
| 12 | 300 | 563  | 14-Jan-13 | XXXXXXXXXX |
| 12 | 300 | 671  | 15-Jan-13 | XXXXXXXXXX |
| 12 | 350 | 423  | 14-Jan-13 | XXXXXXXXXX |
| 12 | 300 | 597  | 15-Jan-13 | XXXXXXXXXX |
| 12 | 300 | 465  | 14-Jan-13 | XXXXXXXXXX |
| 12 | 300 | 693  | 16-Jan-13 | XXXXXXXXXX |
| 12 | 350 | 375  | 08-Jan-13 | XXXXXXXXXX |
| 12 | 300 | 568  | 16-Jan-13 | XXXXXXXXXX |
| 12 | 300 | 671  | 21-Jan-13 | XXXXXXXXXX |
| 12 | 300 | 538  | 11-Jan-13 | XXXXXXXXXX |
| 12 | 350 | 520  | 09-Jan-13 | XXXXXXXXXX |
| 12 | 300 | 366  | 07-Jan-13 | XXXXXXXXXX |
| 12 | 300 | 764  | 21-Jan-13 | XXXXXXXXXX |
| 12 | 350 | 1299 | 22-Jan-13 | XXXXXXXXXX |
| 8  | 420 | 368  | 07-Jan-13 | XXXXXXXXXX |
| 8  | 400 | 630  | 15-Jan-13 | XXXXXXXXXX |
| 8  | 500 | 905  | 17-Jan-13 | XXXXXXXXXX |
| 8  | 300 | 1037 | 21-Jan-13 | XXXXXXXXXX |
| 8  | 650 | 871  | 17-Jan-13 | XXXXXXXXXX |
| 8  | 400 | 1188 | 21-Jan-13 | XXXXXXXXXX |
| 8  | 500 | 490  | 09-Jan-13 | XXXXXXXXXX |
| 8  | 550 | 643  | 18-Jan-13 | XXXXXXXXXX |
| 8  | 650 | 377  | 07-Jan-13 | XXXXXXXXXX |
| 8  | 600 | 908  | 17-Jan-13 | XXXXXXXXXX |
| 8  | 500 | 477  | 15-Jan-13 | XXXXXXXXXX |
| 8  | 500 | 1025 | 21-Jan-13 | XXXXXXXXXX |



|   |      |      |           |            |
|---|------|------|-----------|------------|
| 8 | 500  | 783  | 22-Jan-13 | XXXXXXXXXX |
| 8 | 500  | 923  | 17-Jan-13 | XXXXXXXXXX |
| 8 | 500  | 603  | 15-Jan-13 | XXXXXXXXXX |
| 8 | 650  | 809  | 22-Jan-13 | XXXXXXXXXX |
| 8 | 650  | 1075 | 21-Jan-13 | XXXXXXXXXX |
| 9 | 1280 | 382  | 07-Jan-13 | XXXXXXXXXX |
| 9 | 1000 | 899  | 17-Jan-13 | XXXXXXXXXX |
| 9 | 950  | 634  | 17-Jan-13 | XXXXXXXXXX |
| 9 | 750  | 369  | 08-Jan-13 | XXXXXXXXXX |
| 9 | 1070 | 440  | 08-Jan-13 | XXXXXXXXXX |
| 8 | 440  | 591  | 16-Jan-13 | XXXXXXXXXX |
| 8 | 500  | 629  | 15-Jan-13 | XXXXXXXXXX |
| 8 | 600  | 846  | 17-Jan-13 | XXXXXXXXXX |
| 9 | 750  | 630  | 15-Jan-13 | XXXXXXXXXX |
| 8 | 650  | 1316 | 22-Jan-13 | XXXXXXXXXX |
| 8 | 600  | 427  | 14-Jan-13 | XXXXXXXXXX |
| 8 | 450  | 553  | 16-Jan-13 | XXXXXXXXXX |
| 8 | 400  | 476  | 15-Jan-13 | XXXXXXXXXX |
| 8 | 450  | 578  | 15-Jan-13 | XXXXXXXXXX |
| 8 | 500  | 610  | 15-Jan-13 | XXXXXXXXXX |
| 8 | 500  | 334  | 07-Jan-13 | XXXXXXXXXX |
| 8 | 650  | 721  | 21-Jan-13 | XXXXXXXXXX |
| 8 | 550  | 416  | 08-Jan-13 | XXXXXXXXXX |
| 8 | 450  | 544  | 16-Jan-13 | XXXXXXXXXX |
| 8 | 600  | 791  | 22-Jan-13 | XXXXXXXXXX |
| 8 | 600  | 387  | 08-Jan-13 | XXXXXXXXXX |
| 8 | 450  | 1271 | 22-Jan-13 | XXXXXXXXXX |
| 8 | 650  | 738  | 16-Jan-13 | XXXXXXXXXX |
| 8 | 550  |      |           | XXXXXXXXXX |
| 8 | 700  | 343  | 07-Jan-13 | XXXXXXXXXX |
| 8 | 650  | 930  | 17-Jan-13 | XXXXXXXXXX |
| 8 | 550  | 798  | 16-Jan-13 | XXXXXXXXXX |
| 8 | 500  | 917  | 17-Jan-13 | XXXXXXXXXX |
| 8 | 650  | 651  | 18-Jan-13 | XXXXXXXXXX |
| 8 | 850  | 617  | 15-Jan-13 | XXXXXXXXXX |
| 8 | 500  | 593  | 15-Jan-13 | XXXXXXXXXX |
| 8 | 500  | 416  | 08-Jan-13 | XXXXXXXXXX |
| 8 | 600  | 532  | 09-Jan-13 | XXXXXXXXXX |
| 8 | 500  | 1330 | 22-Jan-13 | XXXXXXXXXX |
| 8 | 550  | 470  | 10-Jan-13 | XXXXXXXXXX |
| 8 | 520  | 402  | 09-Jan-13 | XXXXXXXXXX |
| 8 | 550  | 1086 | 21-Jan-13 | XXXXXXXXXX |
| 8 | 480  | 987  | 17-Jan-13 | XXXXXXXXXX |
| 8 | 700  | 461  | 14-Jan-13 | XXXXXXXXXX |
| 8 | 600  | 486  | 15-Jan-13 | XXXXXXXXXX |
| 8 | 550  | 1163 | 21-Jan-13 | XXXXXXXXXX |
| 8 | 650  | 1070 | 21-Jan-13 | XXXXXXXXXX |
| 8 | 650  | 582  | 15-Jan-13 | XXXXXXXXXX |
| 8 | 500  | 575  | 14-Jan-13 | XXXXXXXXXX |
| 8 | 600  | 970  | 17-Jan-13 | XXXXXXXXXX |

|   |     |      |           |            |
|---|-----|------|-----------|------------|
| 8 | 450 | 779  | 16-Jan-13 | XXXXXXXXXX |
| 8 | 450 | 544  | 14-Jan-13 | XXXXXXXXXX |
| 8 | 500 | 601  | 17-Jan-13 | XXXXXXXXXX |
| 8 | 550 | 631  | 17-Jan-13 | XXXXXXXXXX |
| 8 | 550 | 582  | 17-Jan-13 | XXXXXXXXXX |
| 8 | 650 | 444  | 08-Jan-13 | XXXXXXXXXX |
| 8 | 500 | 696  | 21-Jan-13 | XXXXXXXXXX |
| 8 | 550 | 409  | 08-Jan-13 | XXXXXXXXXX |
| 8 | 550 | 499  | 15-Jan-13 | XXXXXXXXXX |
| 8 | 550 | 335  | 07-Jan-13 | XXXXXXXXXX |
| 8 | 450 | 1029 | 21-Jan-13 | XXXXXXXXXX |
| 8 | 500 |      |           | XXXXXXXXXX |
| 8 | 500 | 1054 | 21-Jan-13 | XXXXXXXXXX |
| 8 | 500 | 379  | 08-Jan-13 | XXXXXXXXXX |
| 8 | 500 | 1279 | 22-Jan-13 | XXXXXXXXXX |
| 8 | 500 | 364  | 07-Jan-13 | XXXXXXXXXX |
| 8 | 650 | 769  | 21-Jan-13 | XXXXXXXXXX |
| 8 | 480 | 535  | 11-Jan-13 | XXXXXXXXXX |
| 8 | 650 | 623  | 15-Jan-13 | XXXXXXXXXX |
| 8 | 600 | 524  | 09-Jan-13 | XXXXXXXXXX |
| 8 | 700 | 868  | 17-Jan-13 | XXXXXXXXXX |
| 8 | 500 | 635  | 17-Jan-13 | XXXXXXXXXX |
| 8 | 550 | 608  | 15-Jan-13 | XXXXXXXXXX |
| 8 | 550 | 437  | 14-Jan-13 | XXXXXXXXXX |
| 8 | 600 | 882  | 17-Jan-13 | XXXXXXXXXX |
| 8 | 500 | 651  | 17-Jan-13 | XXXXXXXXXX |
| 8 | 460 | 1131 | 21-Jan-13 | XXXXXXXXXX |
| 8 | 450 | 742  | 16-Jan-13 | XXXXXXXXXX |
| 8 | 600 | 1165 | 21-Jan-13 | XXXXXXXXXX |
| 8 | 500 | 844  | 17-Jan-13 | XXXXXXXXXX |
| 8 | 480 | 616  | 17-Jan-13 | XXXXXXXXXX |
| 8 | 530 | 457  | 09-Jan-13 | XXXXXXXXXX |
| 8 | 500 | 1152 | 21-Jan-13 | XXXXXXXXXX |
| 8 | 520 | 798  | 22-Jan-13 | XXXXXXXXXX |
| 8 | 550 | 689  | 21-Jan-13 | XXXXXXXXXX |
| 8 | 500 | 730  | 21-Jan-13 | XXXXXXXXXX |
| 8 | 550 | 762  | 16-Jan-13 | XXXXXXXXXX |
| 8 | 600 | 1310 | 22-Jan-13 | XXXXXXXXXX |
| 8 | 500 | 654  | 15-Jan-13 | XXXXXXXXXX |
| 8 | 560 | 654  | 17-Jan-13 | XXXXXXXXXX |
| 8 | 450 | 559  | 14-Jan-13 | XXXXXXXXXX |
| 8 | 500 | 596  | 15-Jan-13 | XXXXXXXXXX |
| 8 | 500 | 430  | 08-Jan-13 | XXXXXXXXXX |
| 8 | 500 | 703  | 21-Jan-13 | XXXXXXXXXX |
| 8 | 500 | 510  | 15-Jan-13 | XXXXXXXXXX |
| 8 | 550 | 481  | 10-Jan-13 | XXXXXXXXXX |
| 8 | 500 | 394  | 08-Jan-13 | XXXXXXXXXX |
| 8 | 550 | 365  | 07-Jan-13 | XXXXXXXXXX |
| 8 | 480 | 763  | 21-Jan-13 | XXXXXXXXXX |
| 8 | 500 | 1296 | 22-Jan-13 | XXXXXXXXXX |

|   |     |      |           |            |
|---|-----|------|-----------|------------|
| 8 | 600 | 333  | 07-Jan-13 | XXXXXXXXXX |
| 8 | 580 | 553  | 11-Jan-13 | XXXXXXXXXX |
| 8 | 650 | 804  | 22-Jan-13 | XXXXXXXXXX |
| 8 | 570 | 532  | 11-Jan-13 | XXXXXXXXXX |
| 8 | 650 | 649  | 17-Jan-13 | XXXXXXXXXX |
| 8 | 500 | 1130 | 21-Jan-13 | XXXXXXXXXX |
| 8 | 550 | 831  | 17-Jan-13 | XXXXXXXXXX |
| 8 | 500 | 348  | 07-Jan-13 | XXXXXXXXXX |
| 8 | 750 | 1002 | 17-Jan-13 | XXXXXXXXXX |
| 8 | 550 | 664  | 17-Jan-13 | XXXXXXXXXX |
| 8 | 650 | 621  | 17-Jan-13 | XXXXXXXXXX |
| 8 | 650 | 1022 | 21-Jan-13 | XXXXXXXXXX |
| 8 | 450 | 709  | 21-Jan-13 | XXXXXXXXXX |
| 8 | 500 | 423  | 08-Jan-13 | XXXXXXXXXX |
| 8 | 650 | 1081 | 21-Jan-13 | XXXXXXXXXX |
| 8 | 650 | 874  | 17-Jan-13 | XXXXXXXXXX |
| 8 | 500 |      |           | XXXXXXXXXX |
| 8 | 500 | 663  | 15-Jan-13 | XXXXXXXXXX |
| 8 | 450 | 1189 | 21-Jan-13 | XXXXXXXXXX |
| 8 | 550 | 683  | 21-Jan-13 | XXXXXXXXXX |
| 8 | 400 | 604  | 15-Jan-13 | XXXXXXXXXX |
|   | 800 | 533  | 09-Jan-13 | XXXXXXXXXX |
|   | 680 | 380  | 07-Jan-13 | XXXXXXXXXX |
|   | 800 | 767  | 16-Jan-13 | XXXXXXXXXX |
|   | 850 | 1247 | 22-Jan-13 | XXXXXXXXXX |
|   | 700 | 574  | 14-Jan-13 | XXXXXXXXXX |
|   | 700 | 1308 | 22-Jan-13 | XXXXXXXXXX |
|   | 800 | 448  | 14-Jan-13 | XXXXXXXXXX |
|   | 700 | 572  | 16-Jan-13 | XXXXXXXXXX |
|   | 750 | 669  | 21-Jan-13 | XXXXXXXXXX |
|   | 750 | 1295 | 22-Jan-13 | XXXXXXXXXX |
|   | 450 | 991  | 17-Jan-13 | XXXXXXXXXX |
| 1 | 600 | 807  | 22-Jan-13 | XXXXXXXXXX |
|   | 550 | 791  | 16-Jan-13 | XXXXXXXXXX |
| 1 | 600 | 808  | 22-Jan-13 | XXXXXXXXXX |
|   | 550 | 544  | 11-Jan-13 | XXXXXXXXXX |
| 1 | 550 | 536  | 16-Jan-13 | XXXXXXXXXX |
| 1 | 350 | 398  | 09-Jan-13 | XXXXXXXXXX |
| 1 | 500 | 351  | 07-Jan-13 | XXXXXXXXXX |
|   | 600 | 454  | 08-Jan-13 | XXXXXXXXXX |
|   | 300 | 1065 | 21-Jan-13 | XXXXXXXXXX |
|   | 400 | 1122 | 21-Jan-13 | XXXXXXXXXX |
|   | 600 | 344  | 07-Jan-13 | XXXXXXXXXX |
|   | 500 | 554  | 11-Jan-13 | XXXXXXXXXX |
|   | 600 | 944  | 17-Jan-13 | XXXXXXXXXX |
|   | 400 | 989  | 17-Jan-13 | XXXXXXXXXX |
|   | 500 | 361  | 08-Jan-13 | XXXXXXXXXX |
|   | 550 | 577  | 14-Jan-13 | XXXXXXXXXX |
|   | 450 | 699  | 16-Jan-13 | XXXXXXXXXX |
|   | 450 | 571  | 16-Jan-13 | XXXXXXXXXX |

|   |     |      |           |                          |
|---|-----|------|-----------|--------------------------|
|   | 600 | 826  | 17-Jan-13 | XXXXXXXXXX               |
| 1 | 500 | 594  | 15-Jan-13 | XXXXXXXXXX               |
|   | 520 | 564  | 16-Jan-13 | XXXXXXXXXX               |
|   | 500 | 1319 | 22-Jan-13 | XXXXXXXXXX               |
|   | 600 | 943  | 17-Jan-13 | XXXXXXXXXX               |
|   |     | 679  | 16-Jan-13 | XXXXXXXXXX               |
|   | 500 | 778  | 16-Jan-13 | XXXXXXXXXX               |
|   | 650 | 445  | 08-Jan-13 | XXXXXXXXXX               |
|   | 500 | 394  | 08-Jan-13 | XXXXXXXXXX               |
|   | 300 | 1216 | 21-Jan-13 | XXXXXXXXXX               |
|   | 500 | 668  | 21-Jan-13 | XXXXXXXXXX               |
|   | 350 | 995  | 17-Jan-13 | XXXXXXXXXX               |
|   | 450 | 381  | 07-Jan-13 | XXXXXXXXXX               |
|   | 450 | 548  | 11-Jan-13 | XXXXXXXXXX               |
|   | 550 | 588  | 15-Jan-13 | XXXXXXXXXX               |
|   | 600 | 1217 | 21-Jan-13 | XXXXXXXXXX               |
|   | 600 | 337  | 07-Jan-13 | XXXXXXXXXX               |
|   | 600 | 1248 | 22-Jan-13 | XXXXXXXXXX               |
|   | 700 | 420  | 08-Jan-13 | XXXXXXXXXX               |
|   | 500 | 638  | 15-Jan-13 | XXXXXXXXXX               |
|   | 630 | 667  | 21-Jan-13 | XXXXXXXXXX               |
|   | 500 | 430  | 08-Jan-13 | XXXXXXXXXX               |
| 1 | 400 | 443  | 08-Jan-13 | XXXXXXXXXX               |
|   | 600 | 587  | 15-Jan-13 | XXXXXXXXXX               |
|   | 600 | 343  | 07-Jan-13 | XXXXXXXXXX               |
|   | 650 | 350  | 07-Jan-13 | XXXXXXXXXX               |
|   |     | 1135 | 21-Jan-13 | XXXXXXXXXX               |
|   | 600 | 489  | 15-Jan-13 | XXXXXXXXXX<br>XXXXXXXXXX |
|   | 550 | 597  | 15-Jan-13 | XXXXXXXXXX               |
|   | 600 | 563  | 16-Jan-13 | XXXXXXXXXX               |
|   | 600 | 1320 | 22-Jan-13 | XXXXXXXXXX               |
|   | 650 | 585  | 15-Jan-13 | XXXXXXXXXX               |
|   | 800 | 1263 | 22-Jan-13 | XXXXXXXXXX               |
|   | 600 | 1158 | 21-Jan-13 | XXXXXXXXXX               |
|   | 750 | 1074 | 21-Jan-13 | XXXXXXXXXX               |
|   | 650 | 968  | 17-Jan-13 | XXXXXXXXXX               |
|   | 650 | 444  | 14-Jan-13 | XXXXXXXXXX               |
|   | 650 | 583  | 17-Jan-13 | XXXXXXXXXX               |
|   | 600 | 602  | 16-Jan-13 | XXXXXXXXXX               |
|   | 755 | 441  | 08-Jan-13 | XXXXXXXXXX               |
|   | 850 | 781  | 22-Jan-13 | XXXXXXXXXX               |
|   | 650 | 400  | 08-Jan-13 | XXXXXXXXXX               |
|   | 500 | 453  | 08-Jan-13 | XXXXXXXXXX               |
|   | 600 | 693  | 21-Jan-13 | XXXXXXXXXX               |
|   | 550 | 405  | 08-Jan-13 | XXXXXXXXXX               |
|   | 350 | 1173 | 21-Jan-13 | XXXXXXXXXX               |
|   | 600 | 360  | 08-Jan-13 | XXXXXXXXXX               |
|   | 630 | 591  | 17-Jan-13 | XXXXXXXXXX               |
|   | 650 | 456  | 09-Jan-13 | XXXXXXXXXX               |

|    |     |      |           |            |
|----|-----|------|-----------|------------|
|    | 650 | 569  | 14-Jan-13 | XXXXXXXXXX |
|    | 750 | 1312 | 22-Jan-13 | XXXXXXXXXX |
|    | 600 | 653  | 15-Jan-13 | XXXXXXXXXX |
|    | 600 | 556  | 14-Jan-13 | XXXXXXXXXX |
|    | 600 | 1064 | 21-Jan-13 | XXXXXXXXXX |
|    | 800 | 673  | 21-Jan-13 | XXXXXXXXXX |
|    | 600 | 511  | 15-Jan-13 | XXXXXXXXXX |
|    | 580 | 760  | 21-Jan-13 | XXXXXXXXXX |
|    | 600 | 1292 | 22-Jan-13 | XXXXXXXXXX |
| 1  | 500 | 491  | 09-Jan-13 | XXXXXXXXXX |
| 1  | 450 | 1321 | 22-Jan-13 | XXXXXXXXXX |
| 1  | 550 | 766  | 16-Jan-13 | XXXXXXXXXX |
| 1  | 550 | 595  | 15-Jan-13 | XXXXXXXXXX |
| 12 | 500 | 639  | 18-Jan-13 | XXXXXXXXXX |
| 12 | 500 | 545  | 14-Jan-13 | XXXXXXXXXX |
| 12 |     | 756  | 16-Jan-13 | XXXXXXXXXX |
| 12 | 550 | 519  | 11-Jan-13 | XXXXXXXXXX |
| 12 | 550 | 466  | 09-Jan-13 | XXXXXXXXXX |
| 6  | 700 | 603  | 15-Jan-13 | XXXXXXXXXX |
| 12 | 450 | 372  | 07-Jan-13 | XXXXXXXXXX |
| 12 | 500 | 602  | 15-Jan-13 | XXXXXXXXXX |
| 6  | 450 | 1291 | 22-Jan-13 | XXXXXXXXXX |
| 6  | 450 | 391  | 09-Jan-13 | XXXXXXXXXX |
| 6  | 400 | 685  | 21-Jan-13 | XXXXXXXXXX |
| 1  | 480 | 1123 | 21-Jan-13 | XXXXXXXXXX |
| 1  | 500 | 757  | 21-Jan-13 | XXXXXXXXXX |
| 1  | 500 | 1157 | 21-Jan-13 | XXXXXXXXXX |
| 1  | 850 | 439  | 08-Jan-13 | XXXXXXXXXX |
| 1  | 600 | 382  | 08-Jan-13 | XXXXXXXXXX |
| 1  | 550 | 780  | 22-Jan-13 | XXXXXXXXXX |
| 1  | 650 | 411  | 08-Jan-13 | XXXXXXXXXX |
| 1  | 450 | 404  | 08-Jan-13 | XXXXXXXXXX |
| 1  | 450 | 364  | 08-Jan-13 | XXXXXXXXXX |
| 1  | 500 | 851  | 17-Jan-13 | XXXXXXXXXX |
| 1  | 450 | 507  | 10-Jan-13 | XXXXXXXXXX |
| 1  | 650 | 797  | 22-Jan-13 | XXXXXXXXXX |
| 1  | 480 | 444  | 08-Jan-13 | XXXXXXXXXX |
| 1  | 460 | 1063 | 21-Jan-13 | XXXXXXXXXX |
| 1  | 480 | 670  | 21-Jan-13 | XXXXXXXXXX |
| 1  | 460 | 762  | 21-Jan-13 | XXXXXXXXXX |
| 1  | 500 | 778  | 22-Jan-13 | XXXXXXXXXX |
| 1  | 550 | 449  | 14-Jan-13 | XXXXXXXXXX |
| 1  | 600 | 1306 | 22-Jan-13 | XXXXXXXXXX |
| 1  | 650 | 828  | 17-Jan-13 | XXXXXXXXXX |
| 1  | 650 | 720  | 21-Jan-13 | XXXXXXXXXX |
| 1  | 550 | 345  | 07-Jan-13 | XXXXXXXXXX |
| 1  | 500 | 1232 | 21-Jan-13 | XXXXXXXXXX |
| 1  | 500 | 891  | 17-Jan-13 | XXXXXXXXXX |
| 1  | 500 | 1177 | 21-Jan-13 | XXXXXXXXXX |
| 1  | 650 | 806  | 22-Jan-13 | XXXXXXXXXX |

|    |     |      |           |            |
|----|-----|------|-----------|------------|
| 1  | 500 | 1156 | 21-Jan-13 | XXXXXXXXXX |
| 1  | 650 | 1077 | 21-Jan-13 | XXXXXXXXXX |
| 1  | 500 | 554  | 14-Jan-13 | XXXXXXXXXX |
| 1  | 500 | 574  | 14-Jan-13 | XXXXXXXXXX |
| 1  | 450 | 780  | 16-Jan-13 | XXXXXXXXXX |
| 1  | 550 | 584  | 17-Jan-13 | XXXXXXXXXX |
| 1  | 650 | 598  | 17-Jan-13 | XXXXXXXXXX |
| 1  | 550 | 608  | 16-Jan-13 | XXXXXXXXXX |
| 1  | 650 | 440  | 08-Jan-13 | XXXXXXXXXX |
| 1  | 650 | 383  | 08-Jan-13 | XXXXXXXXXX |
| 1  | 500 | 695  | 21-Jan-13 | XXXXXXXXXX |
| 1  | 650 | 410  | 08-Jan-13 | XXXXXXXXXX |
| 1  | 500 | 398  | 08-Jan-13 | XXXXXXXXXX |
| 1  | 450 | 1114 | 21-Jan-13 | XXXXXXXXXX |
| 1  | 500 | 392  | 09-Jan-13 | XXXXXXXXXX |
| 1  | 480 | 358  | 08-Jan-13 | XXXXXXXXXX |
| 1  | 500 | 849  | 17-Jan-13 | XXXXXXXXXX |
| 1  | 550 | 458  | 09-Jan-13 | XXXXXXXXXX |
| 1  | 600 | 575  | 14-Jan-13 | XXXXXXXXXX |
| 1  | 550 | 508  | 10-Jan-13 | XXXXXXXXXX |
| 1  | 500 | 763  | 16-Jan-13 | XXXXXXXXXX |
| 1  | 600 | 1313 | 22-Jan-13 | XXXXXXXXXX |
| 1  | 500 | 655  | 15-Jan-13 | XXXXXXXXXX |
| 1  | 480 | 700  | 16-Jan-13 | XXXXXXXXXX |
| 1  | 500 | 1066 | 21-Jan-13 | XXXXXXXXXX |
| 1  | 500 | 573  | 16-Jan-13 | XXXXXXXXXX |
| 1  | 500 | 666  | 21-Jan-13 | XXXXXXXXXX |
| 1  | 500 | 542  | 11-Jan-13 | XXXXXXXXXX |
| 1  | 460 | 761  | 21-Jan-13 | XXXXXXXXXX |
| 1  | 500 | 1297 | 22-Jan-13 | XXXXXXXXXX |
| 1  |     |      |           | XXXXXXXXXX |
| 1  | 500 | 429  | 08-Jan-13 | XXXXXXXXXX |
| 1  | 650 | 805  | 22-Jan-13 | XXXXXXXXXX |
| 1  | 650 | 958  | 17-Jan-13 | XXXXXXXXXX |
| 1  | 500 | 1305 | 22-Jan-13 | XXXXXXXXXX |
| 1  | 500 | 553  | 14-Jan-13 | XXXXXXXXXX |
| 24 | 600 | 1021 | 09-Apr-13 | XXXXXXXXXX |
| 6  | 150 | 1085 | 10-Apr-13 | XXXXXXXXXX |
| 6  | 100 | 1041 | 10-Apr-13 | XXXXXXXXXX |
| 6  | 250 | 1049 | 09-Apr-13 | XXXXXXXXXX |
| 6  | 250 | 909  | 09-Apr-13 | XXXXXXXXXX |
| 6  | 140 | 988  | 09-Apr-13 | XXXXXXXXXX |
| 6  | 150 | 825  | 05-Apr-13 | XXXXXXXXXX |
| 6  | 150 | 1242 | 10-Apr-13 | XXXXXXXXXX |
| 6  | 100 | 1286 | 10-Apr-13 | XXXXXXXXXX |
| 6  | 150 | 962  | 08-Apr-13 | XXXXXXXXXX |
| 6  | 200 | 923  | 09-Apr-13 | XXXXXXXXXX |
| 6  | 200 | 743  | 14-Mar-13 | XXXXXXXXXX |
| 6  | 250 | 879  | 08-Apr-13 | XXXXXXXXXX |
| 6  | 180 | 993  | 09-Apr-13 | XXXXXXXXXX |

|    |      |      |           |            |
|----|------|------|-----------|------------|
| 6  | 150  | 950  | 09-Apr-13 | XXXXXXXXXX |
| 6  | 80   | 708  | 14-Mar-13 | XXXXXXXXXX |
| 12 | 200  | 1345 | 11-Apr-13 | XXXXXXXXXX |
| 12 | 250  | 929  | 08-Apr-13 | XXXXXXXXXX |
| 12 | 300  | 1303 | 11-Apr-13 | XXXXXXXXXX |
| 12 | 300  | 880  | 08-Apr-13 | XXXXXXXXXX |
| 18 | 300  | 1024 | 10-Apr-13 | XXXXXXXXXX |
| 18 | 150  | 982  | 09-Apr-13 | XXXXXXXXXX |
| 18 | 400  | 1348 | 11-Apr-13 | XXXXXXXXXX |
| 18 | 650  | 1389 | 11-Apr-13 | XXXXXXXXXX |
| 18 | 400  | 1300 | 11-Apr-13 | XXXXXXXXXX |
| 18 | 250  | 1278 | 10-Apr-13 | XXXXXXXXXX |
| 18 | 300  | 882  | 08-Apr-13 | XXXXXXXXXX |
| 18 | 250  | 845  | 08-Apr-13 | XXXXXXXXXX |
| 18 | 350  | 767  | 05-Apr-13 | XXXXXXXXXX |
| 18 | 250  | 1321 | 11-Apr-13 | XXXXXXXXXX |
| 24 | 350  | 809  | 05-Apr-13 | XXXXXXXXXX |
| 24 | 350  | 1082 | 09-Apr-13 | XXXXXXXXXX |
| 24 | 300  | 980  | 09-Apr-13 | XXXXXXXXXX |
| 24 | 300  | 888  | 08-Apr-13 | XXXXXXXXXX |
| 24 | 400  | 725  | 14-Mar-13 | XXXXXXXXXX |
| 24 | 300  | 863  | 08-Apr-13 | XXXXXXXXXX |
| 24 | 350  | 990  | 09-Apr-13 | XXXXXXXXXX |
| 24 | 450  | 959  | 08-Apr-13 | XXXXXXXXXX |
| 24 | 350  | 924  | 09-Apr-13 | XXXXXXXXXX |
| 24 | 300  | 966  | 09-Apr-13 | XXXXXXXXXX |
| 24 | 300  | 1183 | 10-Apr-13 | XXXXXXXXXX |
| 24 | 250  | 1177 | 10-Apr-13 | XXXXXXXXXX |
| 24 | 350  | 883  | 08-Apr-13 | XXXXXXXXXX |
| 24 | 400  | 1114 | 09-Apr-13 | XXXXXXXXXX |
| 24 | 400  | 849  | 08-Apr-13 | XXXXXXXXXX |
| 24 | 300  | 1158 | 10-Apr-13 | XXXXXXXXXX |
| 24 | 300  | 846  | 08-Apr-13 | XXXXXXXXXX |
| 24 | 300  | 916  | 08-Apr-13 | XXXXXXXXXX |
| 24 | 300  | 951  | 09-Apr-13 | XXXXXXXXXX |
| 24 | 400  | 768  | 05-Apr-13 | XXXXXXXXXX |
| 24 | 300  | 930  | 09-Apr-13 | XXXXXXXXXX |
| 24 | 570  | 1089 | 10-Apr-13 | XXXXXXXXXX |
| 24 | 1000 | 752  | 14-Mar-13 | XXXXXXXXXX |
| 24 | 650  | 977  | 09-Apr-13 | XXXXXXXXXX |
| 24 | 600  | 1065 | 09-Apr-13 | XXXXXXXXXX |
| 24 | 600  | 837  | 05-Apr-13 | XXXXXXXXXX |
| 24 | 600  | 942  | 08-Apr-13 | XXXXXXXXXX |
| 24 | 700  | 1255 | 10-Apr-13 | XXXXXXXXXX |
| 24 | 500  | 913  | 08-Apr-13 | XXXXXXXXXX |
| 24 | 550  | 831  | 05-Apr-13 | XXXXXXXXXX |
| 24 | 550  | 819  | 05-Apr-13 | XXXXXXXXXX |
| 24 | 700  | 1333 | 11-Apr-13 | XXXXXXXXXX |
| 24 | 650  | 1230 | 10-Apr-13 | XXXXXXXXXX |
| 24 | 650  | 1187 | 10-Apr-13 | XXXXXXXXXX |

|    |      |      |           |            |
|----|------|------|-----------|------------|
| 24 | 600  | 799  | 05-Apr-13 | XXXXXXXXXX |
| 12 | 400  | 722  | 14-Mar-13 | XXXXXXXXXX |
| 12 | 700  | 1252 | 10-Apr-13 | XXXXXXXXXX |
| 24 | 550  | 1037 | 10-Apr-13 | XXXXXXXXXX |
| 24 | 250  | 1061 | 09-Apr-13 | XXXXXXXXXX |
| 24 | 350  | 889  | 08-Apr-13 | XXXXXXXXXX |
| 24 | 350  | 919  | 08-Apr-13 | XXXXXXXXXX |
| 24 | 500  | 938  | 09-Apr-13 | XXXXXXXXXX |
| 24 | 500  | 1037 | 09-Apr-13 | XXXXXXXXXX |
| 24 | 500  | 1124 | 09-Apr-13 | XXXXXXXXXX |
| 24 | 1000 | 1111 | 10-Apr-13 | XXXXXXXXXX |
| 24 | 1000 | 1094 | 10-Apr-13 | XXXXXXXXXX |
| 24 | 1030 | 1146 | 09-Apr-13 | XXXXXXXXXX |
| 24 | 950  | 1033 | 10-Apr-13 | XXXXXXXXXX |
| 24 | 1100 | 906  | 08-Apr-13 | XXXXXXXXXX |
| 24 | 1000 | 1336 | 11-Apr-13 | XXXXXXXXXX |
| 24 | 960  | 1072 | 10-Apr-13 | XXXXXXXXXX |
| 24 | 550  | 982  | 09-Apr-13 | XXXXXXXXXX |
| 24 | 1000 | 1055 | 09-Apr-13 | XXXXXXXXXX |
| 24 | 1000 | 1074 | 09-Apr-13 | XXXXXXXXXX |
| 24 | 1000 | 1083 | 09-Apr-13 | XXXXXXXXXX |
| 24 | 980  | 1100 | 09-Apr-13 | XXXXXXXXXX |
| 24 | 1000 | 1125 | 09-Apr-13 | XXXXXXXXXX |
| 24 | 1000 | 1377 | 11-Apr-13 | XXXXXXXXXX |
| 24 | 950  | 869  | 08-Apr-13 | XXXXXXXXXX |
| 24 | 1000 | 952  | 08-Apr-13 | XXXXXXXXXX |
| 24 | 1100 | 892  | 08-Apr-13 | XXXXXXXXXX |
| 24 | 1000 | 1169 | 10-Apr-13 | XXXXXXXXXX |
| 24 | 1000 | 1015 | 09-Apr-13 | XXXXXXXXXX |
| 24 | 1100 | 973  | 08-Apr-13 | XXXXXXXXXX |
| 24 | 1000 | 790  | 05-Apr-13 | XXXXXXXXXX |
| 24 | 950  | 1316 | 11-Apr-13 | XXXXXXXXXX |
| 24 | 1000 | 1386 | 11-Apr-13 | XXXXXXXXXX |
| 24 | 950  | 1216 | 10-Apr-13 | XXXXXXXXXX |
| 24 | 1000 | 912  | 08-Apr-13 | XXXXXXXXXX |
| 24 | 1000 | 1176 | 10-Apr-13 | XXXXXXXXXX |
| 24 | 900  | 872  | 08-Apr-13 | XXXXXXXXXX |
| 24 | 950  | 833  | 05-Apr-13 | XXXXXXXXXX |
| 24 | 950  | 1070 | 09-Apr-13 | XXXXXXXXXX |
| 24 | 900  | 818  | 05-Apr-13 | XXXXXXXXXX |
| 24 | 1000 | 761  | 14-Mar-13 | XXXXXXXXXX |
| 24 | 1000 | 933  | 09-Apr-13 | XXXXXXXXXX |
| 24 | 950  | 1359 | 11-Apr-13 | XXXXXXXXXX |
| 18 | 300  | 1202 | 10-Apr-13 | XXXXXXXXXX |
| 18 | 450  | 975  | 09-Apr-13 | XXXXXXXXXX |
| 18 | 190  | 991  | 09-Apr-13 | XXXXXXXXXX |
| 18 | 250  | 953  | 09-Apr-13 | XXXXXXXXXX |
| 18 | 300  | 1019 | 09-Apr-13 | XXXXXXXXXX |
| 24 | 400  | 714  | 14-Mar-13 | XXXXXXXXXX |
| 24 | 300  | 1100 | 10-Apr-13 | XXXXXXXXXX |



|    |      |      |           |            |
|----|------|------|-----------|------------|
| 24 | 450  | 812  | 05-Apr-13 | XXXXXXXXXX |
| 24 | 300  | 1051 | 10-Apr-13 | XXXXXXXXXX |
| 1  | 1150 | 920  | 09-Apr-13 | XXXXXXXXXX |
| 24 | 600  | 908  | 08-Apr-13 | XXXXXXXXXX |
| 24 | 400  | 979  | 09-Apr-13 | XXXXXXXXXX |
| 24 | 500  | 986  | 09-Apr-13 | XXXXXXXXXX |
| 24 | 650  | 1034 | 09-Apr-13 | XXXXXXXXXX |
| 24 | 350  | 892  | 08-Apr-13 | XXXXXXXXXX |
| 24 | 450  | 1003 | 09-Apr-13 | XXXXXXXXXX |
| 24 | 250  | 998  | 09-Apr-13 | XXXXXXXXXX |
| 24 | 350  | 742  | 14-Mar-13 | XXXXXXXXXX |
| 24 | 650  | 1391 | 11-Apr-13 | XXXXXXXXXX |
| 24 | 700  | 829  | 05-Apr-13 | XXXXXXXXXX |
| 24 | 800  | 891  | 08-Apr-13 | XXXXXXXXXX |
| 24 | 350  | 1279 | 10-Apr-13 | XXXXXXXXXX |
| 24 | 900  | 1258 | 10-Apr-13 | XXXXXXXXXX |
| 24 | 400  | 1191 | 10-Apr-13 | XXXXXXXXXX |
| 24 | 300  | 730  | 14-Mar-13 | XXXXXXXXXX |
| 24 | 450  | 1119 | 10-Apr-13 | XXXXXXXXXX |
| 24 | 450  | 940  | 08-Apr-13 | XXXXXXXXXX |
| 24 | 500  | 1004 | 10-Apr-13 | XXXXXXXXXX |
| 24 | 350  | 1110 | 09-Apr-13 | XXXXXXXXXX |
| 24 | 400  | 774  | 05-Apr-13 | XXXXXXXXXX |
| 24 | 450  | 958  | 08-Apr-13 | XXXXXXXXXX |
| 24 | 300  | 727  | 14-Mar-13 | XXXXXXXXXX |
| 6  | 150  | 1101 | 10-Apr-13 | XXXXXXXXXX |
| 6  | 250  | 1340 | 11-Apr-13 | XXXXXXXXXX |
| 6  | 300  | 985  | 09-Apr-13 | XXXXXXXXXX |
| 6  | 200  | 985  | 09-Apr-13 | XXXXXXXXXX |
| 6  | 450  | 1032 | 09-Apr-13 | XXXXXXXXXX |
| 6  | 300  | 1092 | 09-Apr-13 | XXXXXXXXXX |
| 6  | 150  | 1062 | 10-Apr-13 | XXXXXXXXXX |
| 6  | 550  | 1392 | 11-Apr-13 | XXXXXXXXXX |
| 6  | 300  | 935  | 08-Apr-13 | XXXXXXXXXX |
| 6  | 250  | 1297 | 11-Apr-13 | XXXXXXXXXX |
| 12 | 280  | 1047 | 09-Apr-13 | XXXXXXXXXX |
| 12 | 200  | 1062 | 09-Apr-13 | XXXXXXXXXX |
| 12 | 300  | 830  | 05-Apr-13 | XXXXXXXXXX |
| 12 | 250  | 1238 | 10-Apr-13 | XXXXXXXXXX |
| 12 | 200  | 967  | 09-Apr-13 | XXXXXXXXXX |
| 12 | 200  | 775  | 05-Apr-13 | XXXXXXXXXX |
| 24 | 700  | 981  | 09-Apr-13 | XXXXXXXXXX |
| 24 | 700  | 1054 | 09-Apr-13 | XXXXXXXXXX |
| 24 | 650  | 951  | 08-Apr-13 | XXXXXXXXXX |
| 24 | 650  | 896  | 08-Apr-13 | XXXXXXXXXX |
| 24 | 650  | 1190 | 10-Apr-13 | XXXXXXXXXX |
| 24 | 640  | 1213 | 10-Apr-13 | XXXXXXXXXX |
| 6  | 300  | 901  | 08-Apr-13 | XXXXXXXXXX |
| 12 | 300  | 1093 | 09-Apr-13 | XXXXXXXXXX |
| 12 | 300  | 937  | 08-Apr-13 | XXXXXXXXXX |

|    |     |      |           |            |
|----|-----|------|-----------|------------|
| 24 | 250 | 1058 | 09-Apr-13 | XXXXXXXXXX |
| 24 | 300 | 862  | 08-Apr-13 | XXXXXXXXXX |
| 24 | 350 | 1236 | 10-Apr-13 | XXXXXXXXXX |
| 6  | 300 | 965  | 09-Apr-13 | XXXXXXXXXX |
| 6  | 350 | 846  | 08-Apr-13 | XXXXXXXXXX |
| 6  | 150 | 1224 | 10-Apr-13 | XXXXXXXXXX |
| 6  | 700 | 797  | 05-Apr-13 | XXXXXXXXXX |
| 12 | 200 | 947  | 09-Apr-13 | XXXXXXXXXX |
| 12 | 200 | 1089 | 09-Apr-13 | XXXXXXXXXX |
| 12 | 150 | 1059 | 09-Apr-13 | XXXXXXXXXX |
| 12 | 300 | 964  | 09-Apr-13 | XXXXXXXXXX |
| 12 | 300 | 904  | 08-Apr-13 | XXXXXXXXXX |
| 12 | 400 | 845  | 08-Apr-13 | XXXXXXXXXX |
| 12 | 200 | 766  | 05-Apr-13 | XXXXXXXXXX |
| 12 | 200 | 1087 | 10-Apr-13 | XXXXXXXXXX |
| 12 | 250 | 1026 | 10-Apr-13 | XXXXXXXXXX |
| 12 | 100 | 983  | 09-Apr-13 | XXXXXXXXXX |
| 12 | 100 | 1035 | 09-Apr-13 | XXXXXXXXXX |
| 12 | 300 | 1022 | 09-Apr-13 | XXXXXXXXXX |
| 12 | 300 | 1004 | 09-Apr-13 | XXXXXXXXXX |
| 12 | 150 | 1057 | 10-Apr-13 | XXXXXXXXXX |
| 12 | 250 | 836  | 05-Apr-13 | XXXXXXXXXX |
| 12 | 160 | 989  | 09-Apr-13 | XXXXXXXXXX |
| 12 | 300 | 1288 | 10-Apr-13 | XXXXXXXXXX |
| 12 | 250 | 764  | 05-Apr-13 | XXXXXXXXXX |
| 18 | 150 | 709  | 14-Mar-13 | XXXXXXXXXX |
| 24 | 300 | 721  | 14-Mar-13 | XXXXXXXXXX |
| 24 | 500 | 1032 | 10-Apr-13 | XXXXXXXXXX |
| 24 | 400 | 1344 | 11-Apr-13 | XXXXXXXXXX |
| 24 | 300 | 1029 | 09-Apr-13 | XXXXXXXXXX |
| 24 | 300 | 978  | 09-Apr-13 | XXXXXXXXXX |
| 24 | 350 | 1023 | 09-Apr-13 | XXXXXXXXXX |
| 24 | 250 | 1375 | 11-Apr-13 | XXXXXXXXXX |
| 24 | 200 | 824  | 05-Apr-13 | XXXXXXXXXX |
| 24 | 300 | 826  | 05-Apr-13 | XXXXXXXXXX |
| 24 | 850 | 931  | 08-Apr-13 | XXXXXXXXXX |
| 24 | 450 | 1347 | 11-Apr-13 | XXXXXXXXXX |
| 24 | 600 | 1118 | 10-Apr-13 | XXXXXXXXXX |
| 24 | 350 | 941  | 08-Apr-13 | XXXXXXXXXX |
| 24 | 350 | 1131 | 09-Apr-13 | XXXXXXXXXX |
| 24 | 750 | 854  | 08-Apr-13 | XXXXXXXXXX |
| 24 | 250 | 918  | 08-Apr-13 | XXXXXXXXXX |
| 24 | 400 | 765  | 05-Apr-13 | XXXXXXXXXX |
| 24 | 350 | 1309 | 11-Apr-13 | XXXXXXXXXX |
| 24 | 300 | 1086 | 10-Apr-13 | XXXXXXXXXX |
| 24 | 300 | 1208 | 10-Apr-13 | XXXXXXXXXX |
| 24 | 450 | 811  | 05-Apr-13 | XXXXXXXXXX |
| 24 | 500 | 877  | 08-Apr-13 | XXXXXXXXXX |
| 24 | 300 | 946  | 09-Apr-13 | XXXXXXXXXX |
| 24 | 300 | 979  | 09-Apr-13 | XXXXXXXXXX |

|    |      |      |           |            |
|----|------|------|-----------|------------|
| 24 | 300  | 910  | 09-Apr-13 | XXXXXXXXXX |
| 24 | 350  | 937  | 09-Apr-13 | XXXXXXXXXX |
| 24 | 120  | 984  | 09-Apr-13 | XXXXXXXXXX |
| 24 | 200  | 1038 | 09-Apr-13 | XXXXXXXXXX |
| 24 | 350  | 1101 | 09-Apr-13 | XXXXXXXXXX |
| 24 | 250  | 1245 | 10-Apr-13 | XXXXXXXXXX |
| 24 | 200  | 783  | 05-Apr-13 | XXXXXXXXXX |
| 24 | 250  | 777  | 05-Apr-13 | XXXXXXXXXX |
| 24 | 150  | 741  | 14-Mar-13 | XXXXXXXXXX |
| 24 | 350  | 954  | 09-Apr-13 | XXXXXXXXXX |
| 24 | 240  | 990  | 09-Apr-13 | XXXXXXXXXX |
| 24 | 300  | 861  | 08-Apr-13 | XXXXXXXXXX |
| 24 | 300  | 988  | 09-Apr-13 | XXXXXXXXXX |
| 24 | 250  | 887  | 08-Apr-13 | XXXXXXXXXX |
| 24 | 350  | 1281 | 10-Apr-13 | XXXXXXXXXX |
| 24 | 600  | 1251 | 10-Apr-13 | XXXXXXXXXX |
| 24 | 400  | 731  | 14-Mar-13 | XXXXXXXXXX |
| 24 | 300  | 1153 | 09-Apr-13 | XXXXXXXXXX |
| 24 | 400  | 1111 | 09-Apr-13 | XXXXXXXXXX |
| 24 | 300  | 832  | 05-Apr-13 | XXXXXXXXXX |
| 24 | 300  | 1016 | 09-Apr-13 | XXXXXXXXXX |
| 24 | 200  | 1353 | 11-Apr-13 | XXXXXXXXXX |
| 24 | 300  | 1366 | 11-Apr-13 | XXXXXXXXXX |
| 24 | 300  | 753  | 14-Mar-13 | XXXXXXXXXX |
| 24 | 800  | 1259 | 10-Apr-13 | XXXXXXXXXX |
| 24 | 400  | 957  | 08-Apr-13 | XXXXXXXXXX |
| 24 | 750  | 907  | 08-Apr-13 | XXXXXXXXXX |
| 24 | 670  | 1143 | 09-Apr-13 | XXXXXXXXXX |
| 24 | 580  | 1046 | 09-Apr-13 | XXXXXXXXXX |
| 24 | 630  | 1382 | 11-Apr-13 | XXXXXXXXXX |
| 24 | 650  | 1233 | 10-Apr-13 | XXXXXXXXXX |
| 24 | 650  | 970  | 09-Apr-13 | XXXXXXXXXX |
| 24 | 600  | 858  | 08-Apr-13 | XXXXXXXXXX |
| 24 | 500  | 1199 | 10-Apr-13 | XXXXXXXXXX |
| 12 | 720  | 905  | 08-Apr-13 | XXXXXXXXXX |
| 12 | 600  | 1263 | 10-Apr-13 | XXXXXXXXXX |
| 12 | 600  | 864  | 08-Apr-13 | XXXXXXXXXX |
| 12 | 500  | 1088 | 10-Apr-13 | XXXXXXXXXX |
| 12 | 500  | 1050 | 10-Apr-13 | XXXXXXXXXX |
| 12 | 1000 | 751  | 14-Mar-13 | XXXXXXXXXX |
| 12 | 520  | 902  | 08-Apr-13 | XXXXXXXXXX |
| 12 | 600  | 1068 | 10-Apr-13 | XXXXXXXXXX |
| 12 | 550  | 1016 | 10-Apr-13 | XXXXXXXXXX |
| 12 | 850  | 933  | 08-Apr-13 | XXXXXXXXXX |
| 12 | 500  | 859  | 08-Apr-13 | XXXXXXXXXX |
| 12 | 600  | 1166 | 10-Apr-13 | XXXXXXXXXX |
| 12 | 500  | 1324 | 11-Apr-13 | XXXXXXXXXX |
| 12 | 400  | 897  | 08-Apr-13 | XXXXXXXXXX |
| 12 | 450  | 1264 | 10-Apr-13 | XXXXXXXXXX |
| 12 | 500  | 711  | 14-Mar-13 | XXXXXXXXXX |

|    |      |      |           |            |
|----|------|------|-----------|------------|
| 12 | 550  | 822  | 05-Apr-13 | XXXXXXXXXX |
| 12 | 600  | 926  | 08-Apr-13 | XXXXXXXXXX |
| 12 | 500  | 925  | 09-Apr-13 | XXXXXXXXXX |
| 12 | 650  | 754  | 14-Mar-13 | XXXXXXXXXX |
| 12 | 600  | 867  | 08-Apr-13 | XXXXXXXXXX |
| 12 | 650  | 1065 | 10-Apr-13 | XXXXXXXXXX |
| 12 | 500  | 1327 | 11-Apr-13 | XXXXXXXXXX |
| 12 | 650  | 1229 | 10-Apr-13 | XXXXXXXXXX |
| 12 | 600  | 1231 | 10-Apr-13 | XXXXXXXXXX |
| 12 | 600  | 973  | 09-Apr-13 | XXXXXXXXXX |
| 6  | 500  | 1203 | 10-Apr-13 | XXXXXXXXXX |
| 6  | 480  | 1048 | 10-Apr-13 | XXXXXXXXXX |
| 6  | 650  | 903  | 08-Apr-13 | XXXXXXXXXX |
| 6  | 650  | 1064 | 10-Apr-13 | XXXXXXXXXX |
| 6  | 550  | 1018 | 10-Apr-13 | XXXXXXXXXX |
| 6  | 750  | 980  | 09-Apr-13 | XXXXXXXXXX |
| 6  | 650  | 886  | 08-Apr-13 | XXXXXXXXXX |
| 6  | 900  | 785  | 05-Apr-13 | XXXXXXXXXX |
| 6  | 600  | 864  | 08-Apr-13 | XXXXXXXXXX |
| 6  | 700  | 888  | 08-Apr-13 | XXXXXXXXXX |
| 6  | 600  | 1168 | 10-Apr-13 | XXXXXXXXXX |
| 6  | 600  | 792  | 05-Apr-13 | XXXXXXXXXX |
| 6  | 600  | 1387 | 11-Apr-13 | XXXXXXXXXX |
| 6  | 550  | 878  | 08-Apr-13 | XXXXXXXXXX |
| 6  | 600  | 1115 | 09-Apr-13 | XXXXXXXXXX |
| 6  | 650  | 844  | 08-Apr-13 | XXXXXXXXXX |
| 6  | 600  | 1071 | 09-Apr-13 | XXXXXXXXXX |
| 6  | 550  | 710  | 14-Mar-13 | XXXXXXXXXX |
| 6  | 600  | 926  | 09-Apr-13 | XXXXXXXXXX |
| 6  | 650  | 1023 | 10-Apr-13 | XXXXXXXXXX |
| 6  | 700  | 1332 | 11-Apr-13 | XXXXXXXXXX |
| 6  | 600  | 1014 | 10-Apr-13 | XXXXXXXXXX |
| 6  | 680  | 1044 | 09-Apr-13 | XXXXXXXXXX |
| 6  | 550  | 1379 | 11-Apr-13 | XXXXXXXXXX |
| 6  | 650  | 733  | 14-Mar-13 | XXXXXXXXXX |
| 6  | 700  | 1313 | 11-Apr-13 | XXXXXXXXXX |
| 6  | 650  | 1097 | 09-Apr-13 | XXXXXXXXXX |
| 6  | 630  | 1145 | 09-Apr-13 | XXXXXXXXXX |
| 6  | 750  | 1039 | 10-Apr-13 | XXXXXXXXXX |
| 6  | 1000 | 749  | 14-Mar-13 | XXXXXXXXXX |
| 6  | 600  | 1385 | 11-Apr-13 | XXXXXXXXXX |
| 6  | 630  | 1221 | 10-Apr-13 | XXXXXXXXXX |
| 6  | 800  | 927  | 09-Apr-13 | XXXXXXXXXX |
| 6  | 650  | 1063 | 10-Apr-13 | XXXXXXXXXX |
| 6  | 700  | 1107 | 09-Apr-13 | XXXXXXXXXX |
| 6  | 630  | 1121 | 09-Apr-13 | XXXXXXXXXX |
| 6  | 600  | 870  | 08-Apr-13 | XXXXXXXXXX |
| 6  | 650  | 1028 | 09-Apr-13 | XXXXXXXXXX |
| 6  | 300  | 1271 | 10-Apr-13 | XXXXXXXXXX |
| 6  | 500  | 1059 | 10-Apr-13 | XXXXXXXXXX |

|   |     |      |           |            |
|---|-----|------|-----------|------------|
| 6 | 700 | 1235 | 10-Apr-13 | XXXXXXXXXX |
| 6 | 550 | 821  | 05-Apr-13 | XXXXXXXXXX |
| 6 | 550 | 1322 | 11-Apr-13 | XXXXXXXXXX |
| 6 | 500 | 1265 | 10-Apr-13 | XXXXXXXXXX |
| 6 | 600 | 755  | 14-Mar-13 | XXXXXXXXXX |
| 6 | 600 | 1036 | 09-Apr-13 | XXXXXXXXXX |
| 6 | 850 | 932  | 08-Apr-13 | XXXXXXXXXX |
| 6 | 650 | 1289 | 10-Apr-13 | XXXXXXXXXX |
| 6 | 600 | 1250 | 10-Apr-13 | XXXXXXXXXX |
| 6 | 500 | 871  | 08-Apr-13 | XXXXXXXXXX |
| 6 | 500 | 1180 | 10-Apr-13 | XXXXXXXXXX |
| 6 | 550 | 847  | 08-Apr-13 | XXXXXXXXXX |
| 6 | 540 | 1148 | 09-Apr-13 | XXXXXXXXXX |
| 6 | 600 | 1013 | 10-Apr-13 | XXXXXXXXXX |
| 6 | 700 | 1077 | 09-Apr-13 | XXXXXXXXXX |
| 6 | 680 | 995  | 09-Apr-13 | XXXXXXXXXX |
| 6 | 700 | 1103 | 09-Apr-13 | XXXXXXXXXX |
| 6 | 550 | 1060 | 10-Apr-13 | XXXXXXXXXX |
| 6 | 650 | 858  | 08-Apr-13 | XXXXXXXXXX |
| 6 | 650 | 956  | 09-Apr-13 | XXXXXXXXXX |
| 6 | 450 | 866  | 08-Apr-13 | XXXXXXXXXX |
| 6 | 650 | 969  | 08-Apr-13 | XXXXXXXXXX |
| 6 | 800 | 798  | 05-Apr-13 | XXXXXXXXXX |
| 6 | 550 | 1055 | 10-Apr-13 | XXXXXXXXXX |
| 6 | 600 | 1127 | 09-Apr-13 | XXXXXXXXXX |
| 6 | 550 | 1378 | 11-Apr-13 | XXXXXXXXXX |
| 6 | 600 | 867  | 08-Apr-13 | XXXXXXXXXX |
| 6 | 650 | 1283 | 10-Apr-13 | XXXXXXXXXX |
| 6 | 650 | 1012 | 10-Apr-13 | XXXXXXXXXX |
| 6 | 650 | 911  | 09-Apr-13 | XXXXXXXXXX |
| 6 | 600 | 1086 | 09-Apr-13 | XXXXXXXXXX |
| 6 | 700 | 997  | 09-Apr-13 | XXXXXXXXXX |
| 6 | 600 | 779  | 05-Apr-13 | XXXXXXXXXX |
| 6 | 750 | 964  | 08-Apr-13 | XXXXXXXXXX |
| 6 | 600 | 1212 | 10-Apr-13 | XXXXXXXXXX |
| 6 | 650 | 862  | 08-Apr-13 | XXXXXXXXXX |
| 6 | 600 | 902  | 08-Apr-13 | XXXXXXXXXX |
| 6 | 550 | 873  | 08-Apr-13 | XXXXXXXXXX |
| 6 | 500 | 848  | 08-Apr-13 | XXXXXXXXXX |
| 6 | 650 | 1181 | 10-Apr-13 | XXXXXXXXXX |
| 6 | 600 | 1064 | 09-Apr-13 | XXXXXXXXXX |
| 6 | 600 | 857  | 08-Apr-13 | XXXXXXXXXX |
| 6 | 700 | 996  | 09-Apr-13 | XXXXXXXXXX |
| 6 | 650 | 1033 | 09-Apr-13 | XXXXXXXXXX |
| 6 | 650 | 1020 | 09-Apr-13 | XXXXXXXXXX |
| 6 | 600 | 884  | 08-Apr-13 | XXXXXXXXXX |
| 6 | 600 | 963  | 08-Apr-13 | XXXXXXXXXX |
| 6 | 600 | 974  | 08-Apr-13 | XXXXXXXXXX |
| 6 | 650 | 900  | 08-Apr-13 | XXXXXXXXXX |
| 6 | 500 | 1182 | 10-Apr-13 | XXXXXXXXXX |

|    |     |      |           |            |
|----|-----|------|-----------|------------|
| 6  | 750 | 769  | 05-Apr-13 | XXXXXXXXXX |
| 6  | 580 | 719  | 14-Mar-13 | XXXXXXXXXX |
| 6  | 650 | 1107 | 10-Apr-13 | XXXXXXXXXX |
| 1  | 500 | 1135 | 09-Apr-13 | XXXXXXXXXX |
| 6  | 550 | 1017 | 10-Apr-13 | XXXXXXXXXX |
| 6  | 550 | 1116 | 09-Apr-13 | XXXXXXXXXX |
| 6  | 600 | 885  | 08-Apr-13 | XXXXXXXXXX |
| 6  | 600 | 1005 | 09-Apr-13 | XXXXXXXXXX |
| 6  | 650 | 839  | 05-Apr-13 | XXXXXXXXXX |
| 6  | 500 | 860  | 08-Apr-13 | XXXXXXXXXX |
| 6  | 650 | 1287 | 10-Apr-13 | XXXXXXXXXX |
| 6  | 600 | 944  | 08-Apr-13 | XXXXXXXXXX |
| 6  | 570 | 1215 | 10-Apr-13 | XXXXXXXXXX |
| 6  | 600 | 771  | 05-Apr-13 | XXXXXXXXXX |
| 6  | 550 | 823  | 05-Apr-13 | XXXXXXXXXX |
| 6  | 570 | 925  | 08-Apr-13 | XXXXXXXXXX |
| 6  | 700 | 718  | 14-Mar-13 | XXXXXXXXXX |
| 6  | 800 | 1093 | 10-Apr-13 | XXXXXXXXXX |
| 6  | 700 | 1207 | 10-Apr-13 | XXXXXXXXXX |
| 6  | 800 | 804  | 05-Apr-13 | XXXXXXXXXX |
| 6  | 750 | 1028 | 10-Apr-13 | XXXXXXXXXX |
| 6  | 750 | 1047 | 10-Apr-13 | XXXXXXXXXX |
| 12 | 900 | 748  | 14-Mar-13 | XXXXXXXXXX |
| 6  | 840 | 893  | 08-Apr-13 | XXXXXXXXXX |
| 6  | 800 | 1331 | 11-Apr-13 | XXXXXXXXXX |
| 6  | 750 | 1071 | 10-Apr-13 | XXXXXXXXXX |
| 6  | 800 | 1105 | 09-Apr-13 | XXXXXXXXXX |
| 6  | 750 | 1007 | 10-Apr-13 | XXXXXXXXXX |
| 6  | 750 | 1030 | 09-Apr-13 | XXXXXXXXXX |
| 6  | 800 | 875  | 08-Apr-13 | XXXXXXXXXX |
| 6  | 850 | 984  | 09-Apr-13 | XXXXXXXXXX |
| 6  | 850 | 1053 | 09-Apr-13 | XXXXXXXXXX |
| 6  | 850 | 1078 | 09-Apr-13 | XXXXXXXXXX |
| 6  | 800 | 935  | 09-Apr-13 | XXXXXXXXXX |
| 6  | 750 | 1118 | 09-Apr-13 | XXXXXXXXXX |
| 6  | 800 | 1102 | 09-Apr-13 | XXXXXXXXXX |
| 6  | 800 | 890  | 08-Apr-13 | XXXXXXXXXX |
| 6  | 790 | 1128 | 09-Apr-13 | XXXXXXXXXX |
| 6  | 700 | 1094 | 09-Apr-13 | XXXXXXXXXX |
| 6  | 700 | 1246 | 10-Apr-13 | XXXXXXXXXX |
| 6  | 750 | 1381 | 11-Apr-13 | XXXXXXXXXX |
| 6  | 700 | 786  | 05-Apr-13 | XXXXXXXXXX |
| 6  | 750 | 968  | 09-Apr-13 | XXXXXXXXXX |
| 6  | 700 | 782  | 05-Apr-13 | XXXXXXXXXX |
| 6  | 750 | 734  | 14-Mar-13 | XXXXXXXXXX |
| 6  | 750 | 843  | 05-Apr-13 | XXXXXXXXXX |
| 6  | 700 | 1390 | 11-Apr-13 | XXXXXXXXXX |
| 6  | 750 | 957  | 09-Apr-13 | XXXXXXXXXX |
| 6  | 700 | 986  | 09-Apr-13 | XXXXXXXXXX |
| 6  | 700 | 856  | 08-Apr-13 | XXXXXXXXXX |

|   |     |      |           |            |
|---|-----|------|-----------|------------|
| 6 | 750 | 1301 | 11-Apr-13 | XXXXXXXXXX |
| 6 | 750 | 1239 | 10-Apr-13 | XXXXXXXXXX |
| 6 | 800 | 886  | 08-Apr-13 | XXXXXXXXXX |
| 6 | 750 | 1163 | 10-Apr-13 | XXXXXXXXXX |
| 6 | 750 | 882  | 08-Apr-13 | XXXXXXXXXX |
| 6 | 850 | 968  | 08-Apr-13 | XXXXXXXXXX |
| 6 | 800 | 1192 | 10-Apr-13 | XXXXXXXXXX |
| 6 | 850 | 922  | 09-Apr-13 | XXXXXXXXXX |
| 6 | 750 | 729  | 14-Mar-13 | XXXXXXXXXX |
| 6 | 750 | 789  | 05-Apr-13 | XXXXXXXXXX |
| 6 | 900 | 1116 | 10-Apr-13 | XXXXXXXXXX |
| 6 | 700 | 958  | 09-Apr-13 | XXXXXXXXXX |
| 6 | 750 | 939  | 08-Apr-13 | XXXXXXXXXX |
| 6 | 750 | 1315 | 11-Apr-13 | XXXXXXXXXX |
| 6 | 700 | 1096 | 09-Apr-13 | XXXXXXXXXX |
| 6 | 750 | 745  | 14-Mar-13 | XXXXXXXXXX |
| 6 | 850 | 1002 | 10-Apr-13 | XXXXXXXXXX |
| 6 | 750 | 1388 | 11-Apr-13 | XXXXXXXXXX |
| 6 | 750 | 1217 | 10-Apr-13 | XXXXXXXXXX |
| 6 | 800 | 914  | 08-Apr-13 | XXXXXXXXXX |
| 6 | 750 | 1188 | 10-Apr-13 | XXXXXXXXXX |
| 6 | 700 | 875  | 08-Apr-13 | XXXXXXXXXX |
| 6 | 750 | 1112 | 09-Apr-13 | XXXXXXXXXX |
| 6 | 750 | 848  | 08-Apr-13 | XXXXXXXXXX |
| 6 | 750 | 851  | 08-Apr-13 | XXXXXXXXXX |
| 6 | 750 | 850  | 08-Apr-13 | XXXXXXXXXX |
| 6 | 700 | 942  | 09-Apr-13 | XXXXXXXXXX |
| 6 | 750 | 835  | 05-Apr-13 | XXXXXXXXXX |
| 6 | 700 | 1225 | 10-Apr-13 | XXXXXXXXXX |
| 6 | 750 | 1068 | 09-Apr-13 | XXXXXXXXXX |
| 6 | 900 | 773  | 05-Apr-13 | XXXXXXXXXX |
| 6 | 700 | 1017 | 09-Apr-13 | XXXXXXXXXX |
| 6 | 800 | 1310 | 11-Apr-13 | XXXXXXXXXX |
| 6 | 750 | 803  | 05-Apr-13 | XXXXXXXXXX |
| 6 | 700 | 817  | 05-Apr-13 | XXXXXXXXXX |
| 6 | 800 | 1364 | 11-Apr-13 | XXXXXXXXXX |
| 6 | 750 | 1228 | 10-Apr-13 | XXXXXXXXXX |
| 6 | 700 | 1317 | 11-Apr-13 | XXXXXXXXXX |
| 6 | 750 | 760  | 14-Mar-13 | XXXXXXXXXX |
| 6 | 750 | 932  | 09-Apr-13 | XXXXXXXXXX |
| 6 | 750 | 1363 | 11-Apr-13 | XXXXXXXXXX |
| 6 | 630 | 1134 | 09-Apr-13 | XXXXXXXXXX |
| 6 | 650 | 1020 | 10-Apr-13 | XXXXXXXXXX |
| 6 | 600 | 1015 | 10-Apr-13 | XXXXXXXXXX |
| 6 | 550 | 1323 | 11-Apr-13 | XXXXXXXXXX |
| 6 | 700 | 1108 | 10-Apr-13 | XXXXXXXXXX |
| 6 | 650 | 1211 | 10-Apr-13 | XXXXXXXXXX |
| 6 | 750 | 1049 | 10-Apr-13 | XXXXXXXXXX |
| 6 | 800 | 1343 | 11-Apr-13 | XXXXXXXXXX |
| 6 | 750 | 1067 | 10-Apr-13 | XXXXXXXXXX |

|    |     |      |           |            |
|----|-----|------|-----------|------------|
| 6  | 800 | 876  | 08-Apr-13 | XXXXXXXXXX |
| 6  | 850 | 976  | 09-Apr-13 | XXXXXXXXXX |
| 6  | 670 | 1380 | 11-Apr-13 | XXXXXXXXXX |
| 6  | 700 | 974  | 09-Apr-13 | XXXXXXXXXX |
| 6  | 800 | 895  | 08-Apr-13 | XXXXXXXXXX |
| 6  | 650 | 1328 | 11-Apr-13 | XXXXXXXXXX |
| 6  | 650 | 706  | 14-Mar-13 | XXXXXXXXXX |
| 6  | 650 | 820  | 05-Apr-13 | XXXXXXXXXX |
| 6  | 800 | 1368 | 11-Apr-13 | XXXXXXXXXX |
| 6  | 650 | 756  | 14-Mar-13 | XXXXXXXXXX |
| 6  | 650 | 1046 | 10-Apr-13 | XXXXXXXXXX |
| 6  | 600 | 778  | 05-Apr-13 | XXXXXXXXXX |
| 6  | 600 | 1189 | 10-Apr-13 | XXXXXXXXXX |
| 6  | 600 | 863  | 08-Apr-13 | XXXXXXXXXX |
| 6  | 600 | 1312 | 11-Apr-13 | XXXXXXXXXX |
| 6  | 500 | 928  | 09-Apr-13 | XXXXXXXXXX |
| 6  | 630 | 1139 | 09-Apr-13 | XXXXXXXXXX |
| 6  | 580 | 1117 | 09-Apr-13 | XXXXXXXXXX |
| 6  | 650 | 987  | 09-Apr-13 | XXXXXXXXXX |
| 6  | 600 | 1196 | 10-Apr-13 | XXXXXXXXXX |
| 6  | 600 | 793  | 05-Apr-13 | XXXXXXXXXX |
| 6  | 600 | 861  | 08-Apr-13 | XXXXXXXXXX |
| 6  | 700 | 1113 | 09-Apr-13 | XXXXXXXXXX |
| 6  | 600 | 849  | 08-Apr-13 | XXXXXXXXXX |
| 6  | 650 | 1069 | 09-Apr-13 | XXXXXXXXXX |
| 6  | 550 | 931  | 09-Apr-13 | XXXXXXXXXX |
| 6  | 550 | 1034 | 10-Apr-13 | XXXXXXXXXX |
| 6  | 700 | 1104 | 09-Apr-13 | XXXXXXXXXX |
| 6  | 650 | 1123 | 09-Apr-13 | XXXXXXXXXX |
| 6  | 600 | 1000 | 09-Apr-13 | XXXXXXXXXX |
| 6  | 850 | 930  | 08-Apr-13 | XXXXXXXXXX |
| 6  | 500 | 1326 | 11-Apr-13 | XXXXXXXXXX |
| 6  | 700 | 941  | 09-Apr-13 | XXXXXXXXXX |
| 6  | 600 | 750  | 14-Mar-13 | XXXXXXXXXX |
| 6  | 600 | 1080 | 09-Apr-13 | XXXXXXXXXX |
| 6  | 850 | 934  | 08-Apr-13 | XXXXXXXXXX |
| 6  | 750 | 1347 | 11-Apr-13 | XXXXXXXXXX |
| 6  | 480 | 879  | 08-Apr-13 | XXXXXXXXXX |
| 6  | 500 | 1295 | 11-Apr-13 | XXXXXXXXXX |
| 6  | 600 | 966  | 08-Apr-13 | XXXXXXXXXX |
| 6  | 550 | 1179 | 10-Apr-13 | XXXXXXXXXX |
| 6  | 500 | 1194 | 10-Apr-13 | XXXXXXXXXX |
| 6  | 715 | 900  | 08-Apr-13 | XXXXXXXXXX |
| 6  | 550 | 978  | 09-Apr-13 | XXXXXXXXXX |
| 6  | 500 | 1234 | 10-Apr-13 | XXXXXXXXXX |
| 6  | 700 | 890  | 08-Apr-13 | XXXXXXXXXX |
| 6  | 800 | 1280 | 10-Apr-13 | XXXXXXXXXX |
| 6  | 480 | 1219 | 10-Apr-13 | XXXXXXXXXX |
| 12 | 300 | 1156 | 10-Apr-13 | XXXXXXXXXX |
| 12 | 300 | 1371 | 11-Apr-13 | XXXXXXXXXX |



|    |     |      |           |            |
|----|-----|------|-----------|------------|
| 12 | 320 | 1099 | 10-Apr-13 | XXXXXXXXXX |
| 12 | 350 | 1073 | 10-Apr-13 | XXXXXXXXXX |
| 12 | 350 | 808  | 05-Apr-13 | XXXXXXXXXX |
| 12 | 320 | 896  | 08-Apr-13 | XXXXXXXXXX |
| 12 | 350 | 1342 | 11-Apr-13 | XXXXXXXXXX |
| 12 | 350 | 1081 | 09-Apr-13 | XXXXXXXXXX |
| 12 | 300 | 1085 | 09-Apr-13 | XXXXXXXXXX |
| 12 | 400 | 1350 | 11-Apr-13 | XXXXXXXXXX |
| 12 | 300 | 788  | 05-Apr-13 | XXXXXXXXXX |
| 12 | 300 | 728  | 14-Mar-13 | XXXXXXXXXX |
| 12 | 300 | 738  | 14-Mar-13 | XXXXXXXXXX |
| 12 | 320 | 1237 | 10-Apr-13 | XXXXXXXXXX |
| 12 | 300 | 1171 | 10-Apr-13 | XXXXXXXXXX |
| 12 | 300 | 1006 | 09-Apr-13 | XXXXXXXXXX |
| 12 | 350 | 946  | 08-Apr-13 | XXXXXXXXXX |
| 12 | 350 | 1260 | 10-Apr-13 | XXXXXXXXXX |
| 12 | 350 | 1113 | 10-Apr-13 | XXXXXXXXXX |
| 12 | 350 | 1314 | 11-Apr-13 | XXXXXXXXXX |
| 12 | 350 | 1099 | 09-Apr-13 | XXXXXXXXXX |
| 12 | 320 | 1223 | 10-Apr-13 | XXXXXXXXXX |
| 12 | 300 | 898  | 08-Apr-13 | XXXXXXXXXX |
| 12 | 350 | 881  | 08-Apr-13 | XXXXXXXXXX |
| 12 | 300 | 1150 | 09-Apr-13 | XXXXXXXXXX |
| 12 | 350 | 1157 | 10-Apr-13 | XXXXXXXXXX |
| 12 | 300 | 943  | 09-Apr-13 | XXXXXXXXXX |
| 12 | 350 | 917  | 08-Apr-13 | XXXXXXXXXX |
| 12 | 300 | 952  | 09-Apr-13 | XXXXXXXXXX |
| 12 | 300 | 1352 | 11-Apr-13 | XXXXXXXXXX |
| 12 | 300 | 802  | 05-Apr-13 | XXXXXXXXXX |
| 12 | 650 | 814  | 05-Apr-13 | XXXXXXXXXX |
| 12 | 350 | 1367 | 11-Apr-13 | XXXXXXXXXX |
| 12 | 300 | 1227 | 10-Apr-13 | XXXXXXXXXX |
| 12 | 300 | 1319 | 11-Apr-13 | XXXXXXXXXX |
| 12 | 300 | 757  | 14-Mar-13 | XXXXXXXXXX |
| 12 | 320 | 924  | 08-Apr-13 | XXXXXXXXXX |
| 12 | 300 | 1031 | 10-Apr-13 | XXXXXXXXXX |
| 12 | 300 | 954  | 08-Apr-13 | XXXXXXXXXX |
| 6  | 300 | 1383 | 11-Apr-13 | XXXXXXXXXX |
| 6  | 280 | 922  | 08-Apr-13 | XXXXXXXXXX |
| 3  | 200 | 1084 | 10-Apr-13 | XXXXXXXXXX |
| 3  | 100 | 784  | 05-Apr-13 | XXXXXXXXXX |
| 3  | 150 | 949  | 08-Apr-13 | XXXXXXXXXX |
| 24 | 500 | 1232 | 10-Apr-13 | XXXXXXXXXX |
| 6  | 150 | 1106 | 10-Apr-13 | XXXXXXXXXX |
| 6  | 200 | 1095 | 10-Apr-13 | XXXXXXXXXX |
| 6  | 150 | 945  | 09-Apr-13 | XXXXXXXXXX |
| 6  | 100 | 1248 | 10-Apr-13 | XXXXXXXXXX |
| 6  | 300 | 899  | 08-Apr-13 | XXXXXXXXXX |
| 12 | 250 | 1019 | 10-Apr-13 | XXXXXXXXXX |
| 24 | 500 | 955  | 08-Apr-13 | XXXXXXXXXX |

|    |     |      |           |            |
|----|-----|------|-----------|------------|
| 6  | 300 | 1090 | 09-Apr-13 | XXXXXXXXXX |
| 24 | 300 | 949  | 09-Apr-13 | XXXXXXXXXX |
| 24 | 400 | 868  | 08-Apr-13 | XXXXXXXXXX |
| 6  | 300 | 720  | 14-Mar-13 | XXXXXXXXXX |
| 6  | 200 | 1075 | 10-Apr-13 | XXXXXXXXXX |
| 6  | 400 | 1052 | 10-Apr-13 | XXXXXXXXXX |
| 6  | 400 | 1109 | 09-Apr-13 | XXXXXXXXXX |
| 6  | 400 | 998  | 09-Apr-13 | XXXXXXXXXX |
| 6  | 250 | 981  | 09-Apr-13 | XXXXXXXXXX |
| 6  | 250 | 1120 | 09-Apr-13 | XXXXXXXXXX |
| 6  | 750 | 1395 | 11-Apr-13 | XXXXXXXXXX |
| 6  | 500 | 724  | 14-Mar-13 | XXXXXXXXXX |
| 6  | 300 | 878  | 08-Apr-13 | XXXXXXXXXX |
| 6  | 750 | 965  | 08-Apr-13 | XXXXXXXXXX |
| 6  | 350 | 963  | 09-Apr-13 | XXXXXXXXXX |
| 6  | 350 | 744  | 14-Mar-13 | XXXXXXXXXX |
| 6  | 250 | 866  | 08-Apr-13 | XXXXXXXXXX |
| 6  | 300 | 905  | 08-Apr-13 | XXXXXXXXXX |
| 6  | 250 | 884  | 08-Apr-13 | XXXXXXXXXX |
| 6  | 300 | 1154 | 09-Apr-13 | XXXXXXXXXX |
| 6  | 350 | 1132 | 09-Apr-13 | XXXXXXXXXX |
| 6  | 300 | 1159 | 10-Apr-13 | XXXXXXXXXX |
| 3  | 300 | 844  | 08-Apr-13 | XXXXXXXXXX |
| 6  | 500 | 940  | 09-Apr-13 | XXXXXXXXXX |
| 6  | 400 | 770  | 05-Apr-13 | XXXXXXXXXX |
| 6  | 350 | 1298 | 11-Apr-13 | XXXXXXXXXX |
| 6  | 300 | 1355 | 11-Apr-13 | XXXXXXXXXX |
| 6  | 400 | 929  | 09-Apr-13 | XXXXXXXXXX |
| 3  | 200 | 1074 | 10-Apr-13 | XXXXXXXXXX |
| 3  | 180 | 948  | 09-Apr-13 | XXXXXXXXXX |
| 3  | 150 | 948  | 08-Apr-13 | XXXXXXXXXX |
| 3  | 150 | 1318 | 11-Apr-13 | XXXXXXXXXX |
| 12 | 500 | 871  | 08-Apr-13 | XXXXXXXXXX |
| 12 | 600 | 800  | 05-Apr-13 | XXXXXXXXXX |
| 6  | 350 | 1275 | 10-Apr-13 | XXXXXXXXXX |
| 12 | 600 | 712  | 14-Mar-13 | XXXXXXXXXX |
| 12 | 500 | 1096 | 10-Apr-13 | XXXXXXXXXX |
| 6  | 450 | 1209 | 10-Apr-13 | XXXXXXXXXX |
| 12 | 550 | 1030 | 10-Apr-13 | XXXXXXXXXX |
| 12 | 520 | 1056 | 10-Apr-13 | XXXXXXXXXX |
| 12 | 650 | 913  | 09-Apr-13 | XXXXXXXXXX |
| 12 | 600 | 889  | 08-Apr-13 | XXXXXXXXXX |
| 12 | 500 | 857  | 08-Apr-13 | XXXXXXXXXX |
| 12 | 480 | 1011 | 09-Apr-13 | XXXXXXXXXX |
| 12 | 650 | 1282 | 10-Apr-13 | XXXXXXXXXX |
| 12 | 700 | 1262 | 10-Apr-13 | XXXXXXXXXX |
| 12 | 500 | 1197 | 10-Apr-13 | XXXXXXXXXX |
| 12 | 500 | 1222 | 10-Apr-13 | XXXXXXXXXX |
| 12 | 550 | 1161 | 10-Apr-13 | XXXXXXXXXX |
| 12 | 500 | 923  | 08-Apr-13 | XXXXXXXXXX |

|    |      |      |           |            |
|----|------|------|-----------|------------|
| 12 | 500  | 1362 | 11-Apr-13 | XXXXXXXXXX |
| 6  | 400  | 715  | 14-Mar-13 | XXXXXXXXXX |
| 6  | 350  | 1098 | 10-Apr-13 | XXXXXXXXXX |
| 6  | 350  | 1210 | 10-Apr-13 | XXXXXXXXXX |
| 6  | 370  | 1012 | 09-Apr-13 | XXXXXXXXXX |
| 6  | 380  | 921  | 08-Apr-13 | XXXXXXXXXX |
| 6  | 550  | 1040 | 10-Apr-13 | XXXXXXXXXX |
| 6  | 450  | 1008 | 10-Apr-13 | XXXXXXXXXX |
| 6  | 600  | 1141 | 09-Apr-13 | XXXXXXXXXX |
| 6  | 500  | 868  | 08-Apr-13 | XXXXXXXXXX |
| 6  | 550  | 1266 | 10-Apr-13 | XXXXXXXXXX |
| 6  | 690  | 1138 | 09-Apr-13 | XXXXXXXXXX |
| 6  | 600  | 1069 | 10-Apr-13 | XXXXXXXXXX |
| 6  | 750  | 1285 | 10-Apr-13 | XXXXXXXXXX |
| 6  | 720  | 992  | 09-Apr-13 | XXXXXXXXXX |
| 6  | 650  | 927  | 08-Apr-13 | XXXXXXXXXX |
| 6  | 1100 | 1112 | 10-Apr-13 | XXXXXXXXXX |
| 6  | 950  | 1042 | 10-Apr-13 | XXXXXXXXXX |
| 6  | 1100 | 895  | 08-Apr-13 | XXXXXXXXXX |
| 6  | 1050 | 1338 | 11-Apr-13 | XXXXXXXXXX |
| 6  | 1100 | 1106 | 09-Apr-13 | XXXXXXXXXX |
| 6  | 900  | 739  | 14-Mar-13 | XXXXXXXXXX |
| 6  | 50   | 828  | 05-Apr-13 | XXXXXXXXXX |
| 6  | 950  | 870  | 08-Apr-13 | XXXXXXXXXX |
| 6  | 950  | 1164 | 10-Apr-13 | XXXXXXXXXX |
| 1  | 1000 | 1291 | 10-Apr-13 | XXXXXXXXXX |
| 6  | 1020 | 1013 | 09-Apr-13 | XXXXXXXXXX |
| 6  | 1100 | 972  | 08-Apr-13 | XXXXXXXXXX |
| 6  | 1000 | 1254 | 10-Apr-13 | XXXXXXXXXX |
| 6  | 900  | 960  | 09-Apr-13 | XXXXXXXXXX |
| 6  | 900  | 1269 | 10-Apr-13 | XXXXXXXXXX |
| 6  | 1000 | 1354 | 11-Apr-13 | XXXXXXXXXX |
| 6  | 550  | 815  | 05-Apr-13 | XXXXXXXXXX |
| 6  | 900  | 759  | 14-Mar-13 | XXXXXXXXXX |
| 6  | 1000 | 1357 | 11-Apr-13 | XXXXXXXXXX |
| 6  | 760  | 904  | 08-Apr-13 | XXXXXXXXXX |
| 6  | 600  | 996  | 09-Apr-13 | XXXXXXXXXX |
| 6  | 650  | 898  | 08-Apr-13 | XXXXXXXXXX |
| 9  | 400  | 1274 | 10-Apr-13 | XXXXXXXXXX |
| 9  | 550  | 762  | 14-Mar-13 | XXXXXXXXXX |
| 3  | 600  | 716  | 14-Mar-13 | XXXXXXXXXX |
| 3  | 750  | 1053 | 10-Apr-13 | XXXXXXXXXX |
| 3  | 650  | 1341 | 11-Apr-13 | XXXXXXXXXX |
| 3  | 480  | 1014 | 09-Apr-13 | XXXXXXXXXX |
| 3  | 900  | 1256 | 10-Apr-13 | XXXXXXXXXX |
| 3  | 600  | 1003 | 10-Apr-13 | XXXXXXXXXX |
| 3  | 650  | 1109 | 10-Apr-13 | XXXXXXXXXX |
| 3  | 630  | 1142 | 09-Apr-13 | XXXXXXXXXX |
| 3  | 800  | 1025 | 10-Apr-13 | XXXXXXXXXX |
| 6  | 720  | 901  | 08-Apr-13 | XXXXXXXXXX |

|    |     |      |           |            |
|----|-----|------|-----------|------------|
| 3  | 780 | 1108 | 09-Apr-13 | XXXXXXXXXX |
| 3  | 650 | 1011 | 10-Apr-13 | XXXXXXXXXX |
| 3  | 800 | 917  | 09-Apr-13 | XXXXXXXXXX |
| 3  | 850 | 1079 | 09-Apr-13 | XXXXXXXXXX |
| 3  | 800 | 1119 | 09-Apr-13 | XXXXXXXXXX |
| 3  | 650 | 1284 | 10-Apr-13 | XXXXXXXXXX |
| 6  | 650 | 865  | 08-Apr-13 | XXXXXXXXXX |
| 3  | 720 | 993  | 09-Apr-13 | XXXXXXXXXX |
| 3  | 700 | 1270 | 10-Apr-13 | XXXXXXXXXX |
| 3  | 750 | 928  | 08-Apr-13 | XXXXXXXXXX |
| 3  | 650 | 1361 | 11-Apr-13 | XXXXXXXXXX |
| 8  | 350 | 1320 | 11-Apr-13 | XXXXXXXXXX |
| 12 | 300 | 717  | 14-Mar-13 | XXXXXXXXXX |
| 12 | 350 | 1110 | 10-Apr-13 | XXXXXXXXXX |
| 12 | 330 | 1091 | 10-Apr-13 | XXXXXXXXXX |
| 12 | 300 | 1147 | 09-Apr-13 | XXXXXXXXXX |
| 12 | 350 | 1043 | 10-Apr-13 | XXXXXXXXXX |
| 12 | 350 | 1076 | 10-Apr-13 | XXXXXXXXXX |
| 12 | 350 | 806  | 05-Apr-13 | XXXXXXXXXX |
| 12 | 500 | 747  | 14-Mar-13 | XXXXXXXXXX |
| 12 | 300 | 1337 | 11-Apr-13 | XXXXXXXXXX |
| 12 | 300 | 1027 | 09-Apr-13 | XXXXXXXXXX |
| 12 | 300 | 874  | 08-Apr-13 | XXXXXXXXXX |
| 12 | 300 | 873  | 08-Apr-13 | XXXXXXXXXX |
| 12 | 300 | 1045 | 09-Apr-13 | XXXXXXXXXX |
| 1  | 300 | 944  | 09-Apr-13 | XXXXXXXXXX |
| 12 | 400 | 914  | 09-Apr-13 | XXXXXXXXXX |
| 12 | 350 | 912  | 09-Apr-13 | XXXXXXXXXX |
| 12 | 350 | 1076 | 09-Apr-13 | XXXXXXXXXX |
| 12 | 330 | 1084 | 09-Apr-13 | XXXXXXXXXX |
| 12 | 300 | 936  | 09-Apr-13 | XXXXXXXXXX |
| 12 | 350 | 977  | 09-Apr-13 | XXXXXXXXXX |
| 12 | 350 | 891  | 08-Apr-13 | XXXXXXXXXX |
| 12 | 300 | 1002 | 09-Apr-13 | XXXXXXXXXX |
| 12 | 350 | 1349 | 11-Apr-13 | XXXXXXXXXX |
| 12 | 300 | 1061 | 10-Apr-13 | XXXXXXXXXX |
| 12 | 300 | 1247 | 10-Apr-13 | XXXXXXXXXX |
| 12 | 300 | 780  | 05-Apr-13 | XXXXXXXXXX |
| 12 | 350 | 736  | 14-Mar-13 | XXXXXXXXXX |
| 12 | 550 | 1394 | 11-Apr-13 | XXXXXXXXXX |
| 12 | 300 | 726  | 14-Mar-13 | XXXXXXXXXX |
| 12 | 300 | 987  | 09-Apr-13 | XXXXXXXXXX |
| 12 | 350 | 827  | 05-Apr-13 | XXXXXXXXXX |
| 12 |     | 855  | 08-Apr-13 | XXXXXXXXXX |
| 12 | 350 | 1304 | 11-Apr-13 | XXXXXXXXXX |
| 12 | 350 | 1240 | 10-Apr-13 | XXXXXXXXXX |
| 12 | 350 | 894  | 08-Apr-13 | XXXXXXXXXX |
| 12 | 300 | 1170 | 10-Apr-13 | XXXXXXXXXX |
| 12 | 300 | 881  | 08-Apr-13 | XXXXXXXXXX |
| 12 | 300 | 994  | 09-Apr-13 | XXXXXXXXXX |

|    |     |      |           |            |
|----|-----|------|-----------|------------|
| 12 | 350 | 945  | 08-Apr-13 | XXXXXXXXXX |
| 12 | 350 | 1253 | 10-Apr-13 | XXXXXXXXXX |
| 12 | 300 | 1193 | 10-Apr-13 | XXXXXXXXXX |
| 12 | 350 | 921  | 09-Apr-13 | XXXXXXXXXX |
| 12 | 300 | 732  | 14-Mar-13 | XXXXXXXXXX |
| 12 | 350 | 791  | 05-Apr-13 | XXXXXXXXXX |
| 12 | 400 | 1117 | 10-Apr-13 | XXXXXXXXXX |
| 12 | 300 | 938  | 08-Apr-13 | XXXXXXXXXX |
| 12 | 300 | 1098 | 09-Apr-13 | XXXXXXXXXX |
| 12 | 350 | 746  | 14-Mar-13 | XXXXXXXXXX |
| 12 | 350 | 1000 | 10-Apr-13 | XXXXXXXXXX |
| 12 | 320 | 1220 | 10-Apr-13 | XXXXXXXXXX |
| 12 | 300 | 903  | 08-Apr-13 | XXXXXXXXXX |
| 12 | 300 | 908  | 08-Apr-13 | XXXXXXXXXX |
| 12 | 300 | 1186 | 10-Apr-13 | XXXXXXXXXX |
| 12 | 350 | 1178 | 10-Apr-13 | XXXXXXXXXX |
| 12 | 300 | 1151 | 09-Apr-13 | XXXXXXXXXX |
| 12 | 300 | 992  | 09-Apr-13 | XXXXXXXXXX |
| 12 | 300 | 877  | 08-Apr-13 | XXXXXXXXXX |
| 12 | 300 | 1160 | 10-Apr-13 | XXXXXXXXXX |
| 12 | 300 | 853  | 08-Apr-13 | XXXXXXXXXX |
| 12 | 300 | 834  | 05-Apr-13 | XXXXXXXXXX |
| 12 | 250 | 1307 | 11-Apr-13 | XXXXXXXXXX |
| 12 | 300 | 705  | 14-Mar-13 | XXXXXXXXXX |
| 12 | 350 | 1018 | 09-Apr-13 | XXXXXXXXXX |
| 12 | 300 | 1308 | 11-Apr-13 | XXXXXXXXXX |
| 12 | 350 | 953  | 08-Apr-13 | XXXXXXXXXX |
| 12 | 300 | 816  | 05-Apr-13 | XXXXXXXXXX |
| 12 | 300 | 1365 | 11-Apr-13 | XXXXXXXXXX |
| 12 | 300 | 763  | 14-Mar-13 | XXXXXXXXXX |
| 12 | 350 | 1360 | 11-Apr-13 | XXXXXXXXXX |
| 8  | 750 | 1043 | 09-Apr-13 | XXXXXXXXXX |
| 8  | 450 | 1370 | 11-Apr-13 | XXXXXXXXXX |
| 8  | 500 | 971  | 09-Apr-13 | XXXXXXXXXX |
| 8  | 500 | 1296 | 11-Apr-13 | XXXXXXXXXX |
| 8  | 500 | 999  | 10-Apr-13 | XXXXXXXXXX |
| 8  | 450 | 1091 | 09-Apr-13 | XXXXXXXXXX |
| 8  | 650 | 713  | 14-Mar-13 | XXXXXXXXXX |
| 8  | 540 | 1008 | 09-Apr-13 | XXXXXXXXXX |
| 8  | 350 | 1384 | 11-Apr-13 | XXXXXXXXXX |
| 8  | 600 | 874  | 08-Apr-13 | XXXXXXXXXX |
| 8  | 600 | 1372 | 11-Apr-13 | XXXXXXXXXX |
| 8  | 500 | 1092 | 10-Apr-13 | XXXXXXXXXX |
| 8  | 500 | 1205 | 10-Apr-13 | XXXXXXXXXX |
| 8  | 500 | 1038 | 10-Apr-13 | XXXXXXXXXX |
| 8  | 550 | 805  | 05-Apr-13 | XXXXXXXXXX |
| 8  | 500 | 1027 | 10-Apr-13 | XXXXXXXXXX |
| 8  | 500 | 1329 | 11-Apr-13 | XXXXXXXXXX |
| 8  | 500 | 1006 | 10-Apr-13 | XXXXXXXXXX |
| 8  | 530 | 1042 | 09-Apr-13 | XXXXXXXXXX |

|    |     |      |           |            |
|----|-----|------|-----------|------------|
| 8  | 600 | 983  | 09-Apr-13 | XXXXXXXXXX |
| 8  | 600 | 1052 | 09-Apr-13 | XXXXXXXXXX |
| 8  | 450 | 1087 | 09-Apr-13 | XXXXXXXXXX |
| 8  | 600 | 994  | 09-Apr-13 | XXXXXXXXXX |
| 8  | 450 | 1063 | 09-Apr-13 | XXXXXXXXXX |
| 8  | 480 | 1376 | 11-Apr-13 | XXXXXXXXXX |
| 8  | 480 | 787  | 05-Apr-13 | XXXXXXXXXX |
| 8  | 550 | 841  | 05-Apr-13 | XXXXXXXXXX |
| 8  | 650 | 1393 | 11-Apr-13 | XXXXXXXXXX |
| 8  | 500 | 723  | 14-Mar-13 | XXXXXXXXXX |
| 8  | 500 | 853  | 08-Apr-13 | XXXXXXXXXX |
| 8  | 500 | 1299 | 11-Apr-13 | XXXXXXXXXX |
| 8  | 600 | 1241 | 10-Apr-13 | XXXXXXXXXX |
| 8  | 550 | 1167 | 10-Apr-13 | XXXXXXXXXX |
| 8  | 650 | 967  | 08-Apr-13 | XXXXXXXXXX |
| 8  | 460 | 1009 | 09-Apr-13 | XXXXXXXXXX |
| 8  | 500 | 1257 | 10-Apr-13 | XXXXXXXXXX |
| 8  | 500 | 1195 | 10-Apr-13 | XXXXXXXXXX |
| 8  | 500 | 1095 | 09-Apr-13 | XXXXXXXXXX |
| 8  | 500 | 1001 | 10-Apr-13 | XXXXXXXXXX |
| 8  | 480 | 1218 | 10-Apr-13 | XXXXXXXXXX |
| 8  | 500 | 910  | 08-Apr-13 | XXXXXXXXXX |
| 8  | 480 | 1175 | 10-Apr-13 | XXXXXXXXXX |
| 8  | 500 | 1152 | 09-Apr-13 | XXXXXXXXXX |
| 8  | 450 | 876  | 08-Apr-13 | XXXXXXXXXX |
| 8  | 555 | 847  | 08-Apr-13 | XXXXXXXXXX |
| 8  | 500 | 852  | 08-Apr-13 | XXXXXXXXXX |
| 8  | 450 | 1267 | 10-Apr-13 | XXXXXXXXXX |
| 8  | 450 | 707  | 14-Mar-13 | XXXXXXXXXX |
| 8  | 600 | 772  | 05-Apr-13 | XXXXXXXXXX |
| 8  | 500 | 1311 | 11-Apr-13 | XXXXXXXXXX |
| 8  | 500 | 801  | 05-Apr-13 | XXXXXXXXXX |
| 8  | 500 | 1369 | 11-Apr-13 | XXXXXXXXXX |
| 8  | 550 | 813  | 05-Apr-13 | XXXXXXXXXX |
| 8  | 450 | 1226 | 10-Apr-13 | XXXXXXXXXX |
| 8  | 550 | 758  | 14-Mar-13 | XXXXXXXXXX |
| 8  | 480 | 920  | 08-Apr-13 | XXXXXXXXXX |
| 8  | 500 | 934  | 09-Apr-13 | XXXXXXXXXX |
| 8  | 500 | 1358 | 11-Apr-13 | XXXXXXXXXX |
| 8  | 550 | 955  | 09-Apr-13 | XXXXXXXXXX |
| 8  | 400 | 1090 | 10-Apr-13 | XXXXXXXXXX |
| 8  | 550 | 1075 | 09-Apr-13 | XXXXXXXXXX |
| 8  | 550 | 1276 | 10-Apr-13 | XXXXXXXXXX |
| 8  | 450 | 855  | 08-Apr-13 | XXXXXXXXXX |
| 12 | 500 | 869  | 08-Apr-13 | XXXXXXXXXX |
| 12 | 550 | 865  | 08-Apr-13 | XXXXXXXXXX |
| 12 | 500 | 989  | 09-Apr-13 | XXXXXXXXXX |
| 6  | 550 | 1306 | 11-Apr-13 | XXXXXXXXXX |
| 1  | 600 | 1103 | 10-Apr-13 | XXXXXXXXXX |
| 1  | 600 | 1206 | 10-Apr-13 | XXXXXXXXXX |

|   |      |      |           |            |
|---|------|------|-----------|------------|
| 1 | 600  | 887  | 08-Apr-13 | XXXXXXXXXX |
| 1 | 600  | 976  | 08-Apr-13 | XXXXXXXXXX |
| 1 | 600  | 795  | 05-Apr-13 | XXXXXXXXXX |
| 1 | 500  | 703  | 14-Mar-13 | XXXXXXXXXX |
| 1 | 550  | 971  | 08-Apr-13 | XXXXXXXXXX |
| 1 | 570  | 1079 | 10-Apr-13 | XXXXXXXXXX |
| 1 | 750  | 919  | 09-Apr-13 | XXXXXXXXXX |
| 1 | 700  | 885  | 08-Apr-13 | XXXXXXXXXX |
| 1 | 400  | 1066 | 10-Apr-13 | XXXXXXXXXX |
| 1 | 500  | 1294 | 10-Apr-13 | XXXXXXXXXX |
| 1 | 550  | 1021 | 10-Apr-13 | XXXXXXXXXX |
| 1 | 500  | 939  | 09-Apr-13 | XXXXXXXXXX |
| 1 | 600  | 1056 | 09-Apr-13 | XXXXXXXXXX |
| 1 | 600  | 838  | 05-Apr-13 | XXXXXXXXXX |
| 1 | 550  | 1290 | 10-Apr-13 | XXXXXXXXXX |
| 1 | 650  | 947  | 08-Apr-13 | XXXXXXXXXX |
| 1 | 750  | 1081 | 10-Apr-13 | XXXXXXXXXX |
| 1 | 750  | 1137 | 09-Apr-13 | XXXXXXXXXX |
| 1 | 850  | 894  | 08-Apr-13 | XXXXXXXXXX |
| 1 | 800  | 915  | 09-Apr-13 | XXXXXXXXXX |
| 1 | 850  | 1072 | 09-Apr-13 | XXXXXXXXXX |
| 1 | 1000 | 1031 | 09-Apr-13 | XXXXXXXXXX |
| 1 | 850  | 840  | 05-Apr-13 | XXXXXXXXXX |
| 1 | 700  | 1302 | 11-Apr-13 | XXXXXXXXXX |
| 1 | 780  | 950  | 08-Apr-13 | XXXXXXXXXX |
| 1 | 850  | 1293 | 10-Apr-13 | XXXXXXXXXX |
| 1 |      | 1102 | 10-Apr-13 | XXXXXXXXXX |
| 1 | 900  | 1249 | 10-Apr-13 | XXXXXXXXXX |
| 1 | 450  | 1272 | 10-Apr-13 | XXXXXXXXXX |
| 1 | 600  | 860  | 08-Apr-13 | XXXXXXXXXX |
| 1 | 500  | 1136 | 09-Apr-13 | XXXXXXXXXX |
| 1 | 600  | 1024 | 09-Apr-13 | XXXXXXXXXX |
| 1 | 500  | 1040 | 09-Apr-13 | XXXXXXXXXX |
| 1 | 500  | 776  | 05-Apr-13 | XXXXXXXXXX |
| 1 |      | 943  | 08-Apr-13 | XXXXXXXXXX |
| 1 | 500  | 1041 | 09-Apr-13 | XXXXXXXXXX |
| 1 | 600  | 1165 | 10-Apr-13 | XXXXXXXXXX |
| 1 | 500  | 1373 | 11-Apr-13 | XXXXXXXXXX |
| 1 | 700  | 796  | 05-Apr-13 | XXXXXXXXXX |
| 1 | 550  | 962  | 09-Apr-13 | XXXXXXXXXX |
| 1 | 530  | 1214 | 10-Apr-13 | XXXXXXXXXX |
| 1 | 400  | 1122 | 09-Apr-13 | XXXXXXXXXX |
| 1 | 650  | 700  | 14-Mar-13 | XXXXXXXXXX |
| 1 | 400  | 1022 | 10-Apr-13 | XXXXXXXXXX |
| 1 | 650  | 1104 | 10-Apr-13 | XXXXXXXXXX |
| 1 | 600  | 1082 | 10-Apr-13 | XXXXXXXXXX |
| 1 | 600  | 1140 | 09-Apr-13 | XXXXXXXXXX |
| 1 | 600  | 1204 | 10-Apr-13 | XXXXXXXXXX |
| 1 | 630  | 1044 | 10-Apr-13 | XXXXXXXXXX |
| 1 | 650  | 807  | 05-Apr-13 | XXXXXXXXXX |

|   |     |      |           |            |
|---|-----|------|-----------|------------|
| 1 | 600 | 1054 | 10-Apr-13 | XXXXXXXXXX |
| 1 | 650 | 899  | 08-Apr-13 | XXXXXXXXXX |
| 1 | 600 | 1330 | 11-Apr-13 | XXXXXXXXXX |
| 1 | 750 | 916  | 09-Apr-13 | XXXXXXXXXX |
| 1 | 600 | 1058 | 10-Apr-13 | XXXXXXXXXX |
| 1 | 600 | 1243 | 10-Apr-13 | XXXXXXXXXX |
| 1 | 550 | 969  | 09-Apr-13 | XXXXXXXXXX |
| 1 | 250 | 842  | 05-Apr-13 | XXXXXXXXXX |
| 1 | 600 | 1305 | 11-Apr-13 | XXXXXXXXXX |
| 1 | 700 | 893  | 08-Apr-13 | XXXXXXXXXX |
| 1 | 600 | 1162 | 10-Apr-13 | XXXXXXXXXX |
| 1 | 550 | 883  | 08-Apr-13 | XXXXXXXXXX |
| 1 | 650 | 1292 | 10-Apr-13 | XXXXXXXXXX |
| 1 | 650 | 960  | 08-Apr-13 | XXXXXXXXXX |
| 1 | 800 | 1261 | 10-Apr-13 | XXXXXXXXXX |
| 1 | 700 | 794  | 05-Apr-13 | XXXXXXXXXX |
| 1 | 850 | 1115 | 10-Apr-13 | XXXXXXXXXX |
| 1 | 550 | 959  | 09-Apr-13 | XXXXXXXXXX |
| 1 | 580 | 1325 | 11-Apr-13 | XXXXXXXXXX |
| 1 | 600 | 907  | 08-Apr-13 | XXXXXXXXXX |
| 1 | 600 | 915  | 08-Apr-13 | XXXXXXXXXX |
| 1 | 600 | 1184 | 10-Apr-13 | XXXXXXXXXX |
| 1 | 680 | 1174 | 10-Apr-13 | XXXXXXXXXX |
| 1 | 600 | 1149 | 09-Apr-13 | XXXXXXXXXX |
| 1 |     | 850  | 08-Apr-13 | XXXXXXXXXX |
| 1 | 600 | 851  | 08-Apr-13 | XXXXXXXXXX |
| 1 | 650 | 1066 | 09-Apr-13 | XXXXXXXXXX |
| 1 | 580 | 702  | 14-Mar-13 | XXXXXXXXXX |
| 1 | 450 | 1088 | 09-Apr-13 | XXXXXXXXXX |
| 6 | 250 | 1273 | 10-Apr-13 | XXXXXXXXXX |
| 6 | 300 | 1201 | 10-Apr-13 | XXXXXXXXXX |
| 6 | 300 | 1029 | 10-Apr-13 | XXXXXXXXXX |
| 6 | 250 | 1010 | 09-Apr-13 | XXXXXXXXXX |
| 6 | 260 | 1097 | 10-Apr-13 | XXXXXXXXXX |
| 6 | 280 | 1144 | 09-Apr-13 | XXXXXXXXXX |
| 6 | 300 | 1200 | 10-Apr-13 | XXXXXXXXXX |
| 6 | 300 | 1339 | 11-Apr-13 | XXXXXXXXXX |
| 6 | 300 | 1048 | 09-Apr-13 | XXXXXXXXXX |
| 6 | 350 | 1001 | 09-Apr-13 | XXXXXXXXXX |
| 6 | 300 | 737  | 14-Mar-13 | XXXXXXXXXX |
| 6 | 260 | 995  | 09-Apr-13 | XXXXXXXXXX |
| 1 | 480 | 1105 | 10-Apr-13 | XXXXXXXXXX |
| 1 | 480 | 1083 | 10-Apr-13 | XXXXXXXXXX |
| 1 | 550 | 1045 | 10-Apr-13 | XXXXXXXXXX |
| 1 | 650 | 897  | 08-Apr-13 | XXXXXXXXXX |
| 1 | 500 | 1335 | 11-Apr-13 | XXXXXXXXXX |
| 1 | 470 | 1070 | 10-Apr-13 | XXXXXXXXXX |
| 1 | 430 | 1039 | 09-Apr-13 | XXXXXXXXXX |
| 1 | 450 | 999  | 09-Apr-13 | XXXXXXXXXX |
| 1 | 500 | 1244 | 10-Apr-13 | XXXXXXXXXX |



|   |     |      |           |            |
|---|-----|------|-----------|------------|
| 1 | 450 | 781  | 05-Apr-13 | XXXXXXXXXX |
| 1 | 460 | 997  | 09-Apr-13 | XXXXXXXXXX |
| 1 | 500 | 975  | 08-Apr-13 | XXXXXXXXXX |
| 1 | 600 | 1114 | 10-Apr-13 | XXXXXXXXXX |
| 1 | 450 | 961  | 09-Apr-13 | XXXXXXXXXX |
| 1 | 500 | 936  | 08-Apr-13 | XXXXXXXXXX |
| 1 | 450 | 909  | 08-Apr-13 | XXXXXXXXXX |
| 1 | 550 | 1173 | 10-Apr-13 | XXXXXXXXXX |
| 1 | 450 | 1130 | 09-Apr-13 | XXXXXXXXXX |
| 1 | 500 | 1356 | 11-Apr-13 | XXXXXXXXXX |
| 1 | 480 | 1080 | 10-Apr-13 | XXXXXXXXXX |
| 1 | 490 | 1077 | 10-Apr-13 | XXXXXXXXXX |
| 1 | 500 | 1334 | 11-Apr-13 | XXXXXXXXXX |
| 1 | 500 | 1010 | 10-Apr-13 | XXXXXXXXXX |
| 1 | 550 | 1026 | 09-Apr-13 | XXXXXXXXXX |
| 1 | 650 | 918  | 09-Apr-13 | XXXXXXXXXX |
| 1 | 700 | 1050 | 09-Apr-13 | XXXXXXXXXX |
| 1 | 550 | 1073 | 09-Apr-13 | XXXXXXXXXX |
| 1 | 480 | 1126 | 09-Apr-13 | XXXXXXXXXX |
| 1 | 500 | 1057 | 09-Apr-13 | XXXXXXXXXX |
| 1 | 500 | 1374 | 11-Apr-13 | XXXXXXXXXX |
| 1 | 500 | 880  | 08-Apr-13 | XXXXXXXXXX |
| 1 | 460 | 991  | 09-Apr-13 | XXXXXXXXXX |
| 1 | 480 | 1172 | 10-Apr-13 | XXXXXXXXXX |
| 1 | 550 | 906  | 08-Apr-13 | XXXXXXXXXX |
| 1 | 500 | 911  | 08-Apr-13 | XXXXXXXXXX |
| 1 | 500 | 1185 | 10-Apr-13 | XXXXXXXXXX |
| 1 | 450 | 1129 | 09-Apr-13 | XXXXXXXXXX |
| 1 | 500 | 852  | 08-Apr-13 | XXXXXXXXXX |
| 1 |     |      | 15-Apr-13 | XXXXXXXXXX |
| 1 | 860 | 1078 | 10-Apr-13 | XXXXXXXXXX |
| 1 | 570 | 1133 | 09-Apr-13 | XXXXXXXXXX |
| 1 | 550 | 1009 | 10-Apr-13 | XXXXXXXXXX |
| 1 | 480 | 1007 | 09-Apr-13 | XXXXXXXXXX |
